# Supplementary material for: Evaluation of surface-based hippocampal registration using ground-truth subfield definitions
Source: eLife journal article supplement (doi:10.7554/elife.88404), 2023-06-30

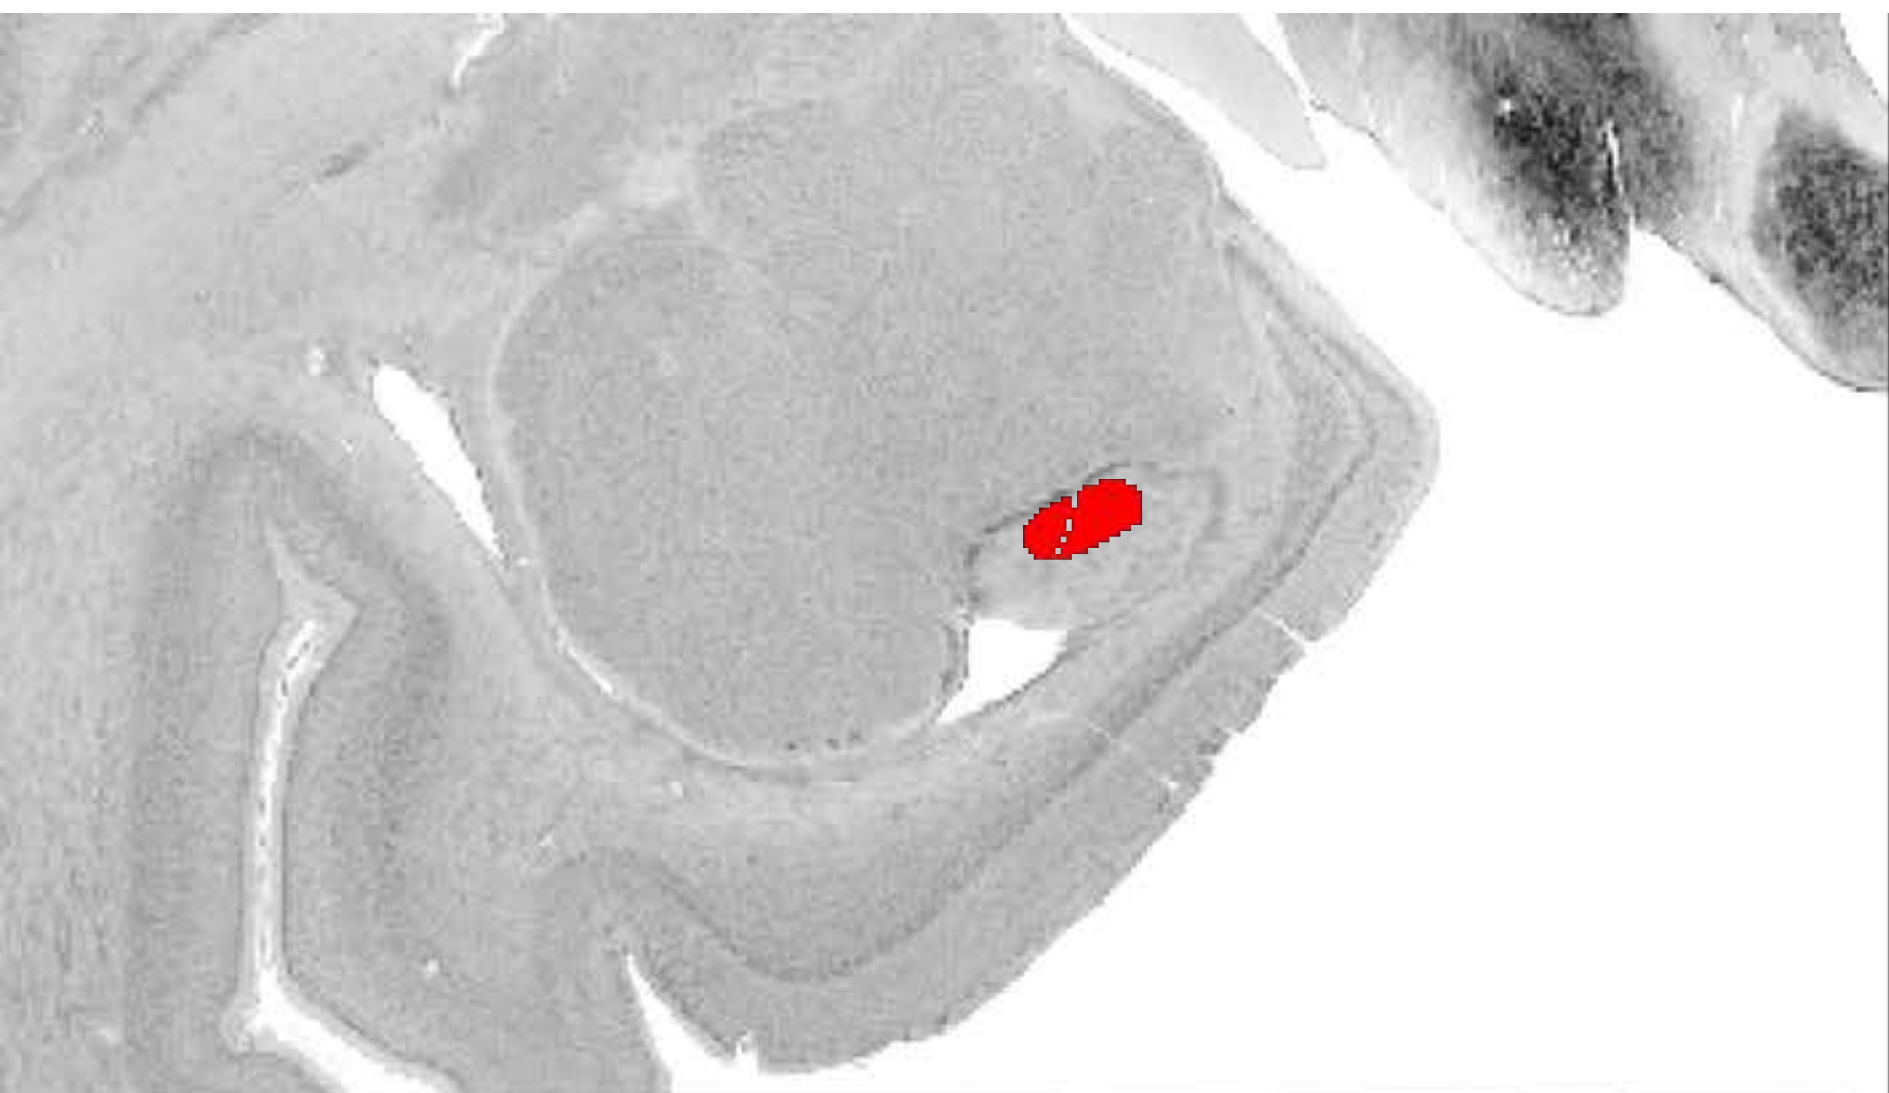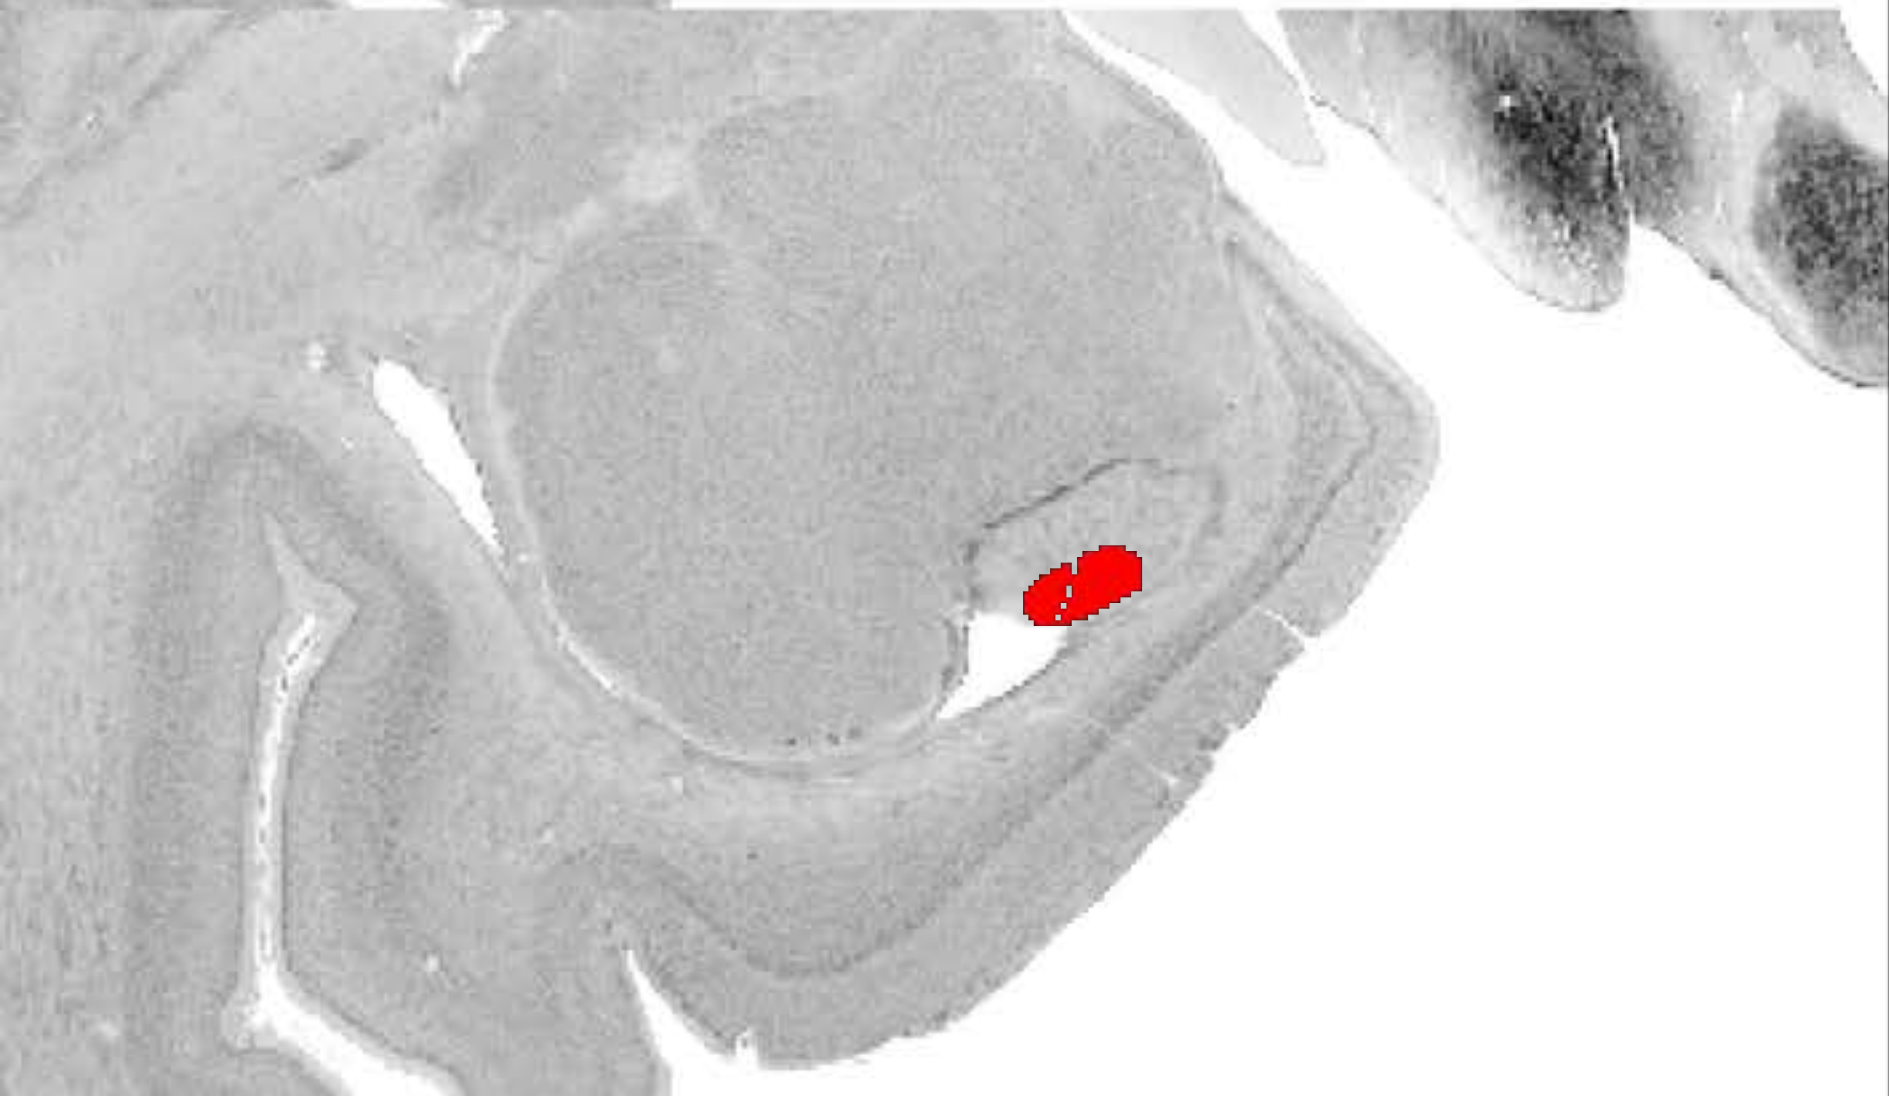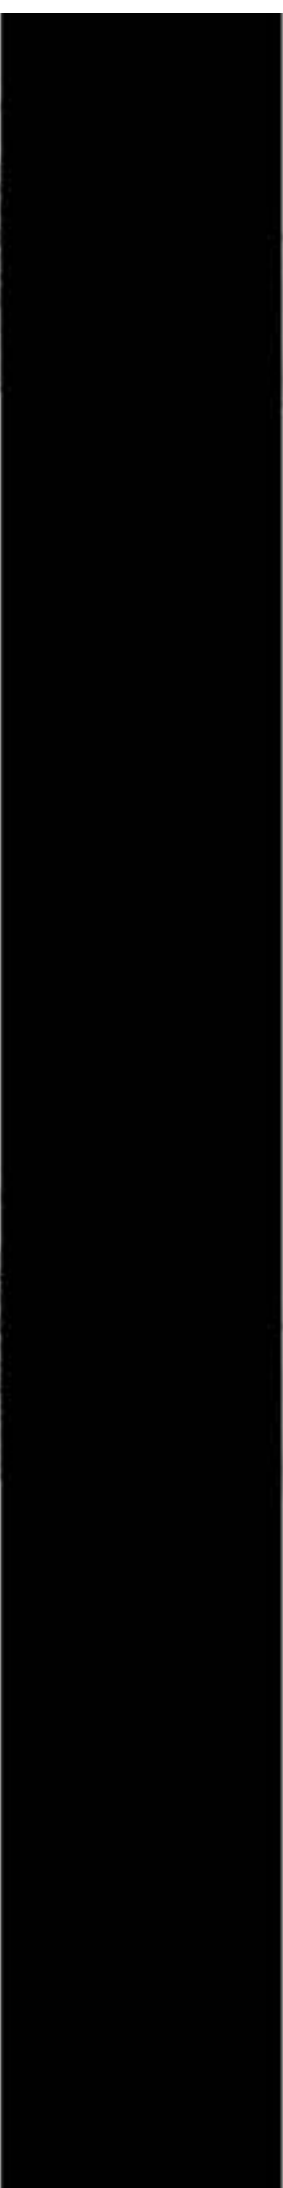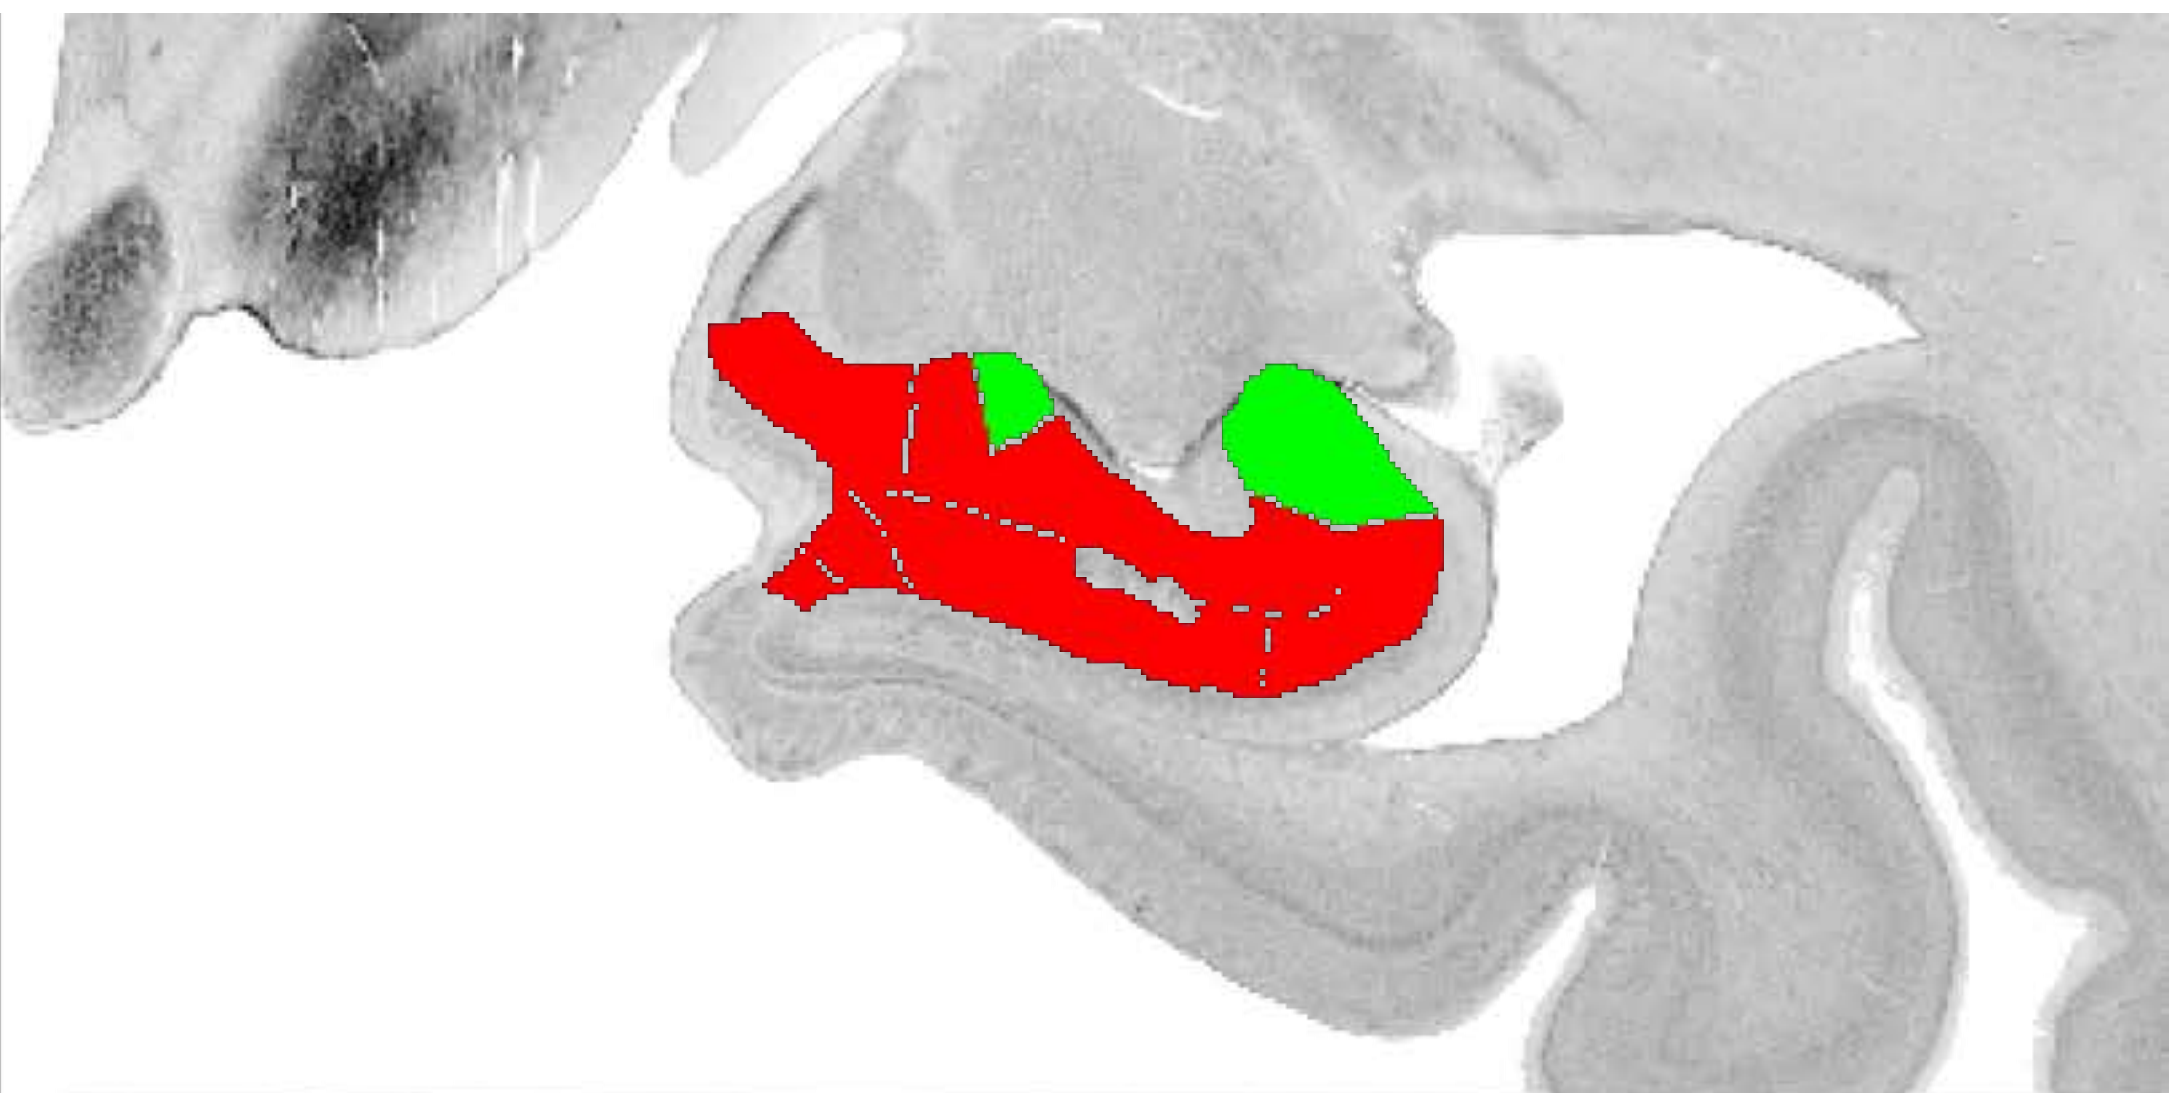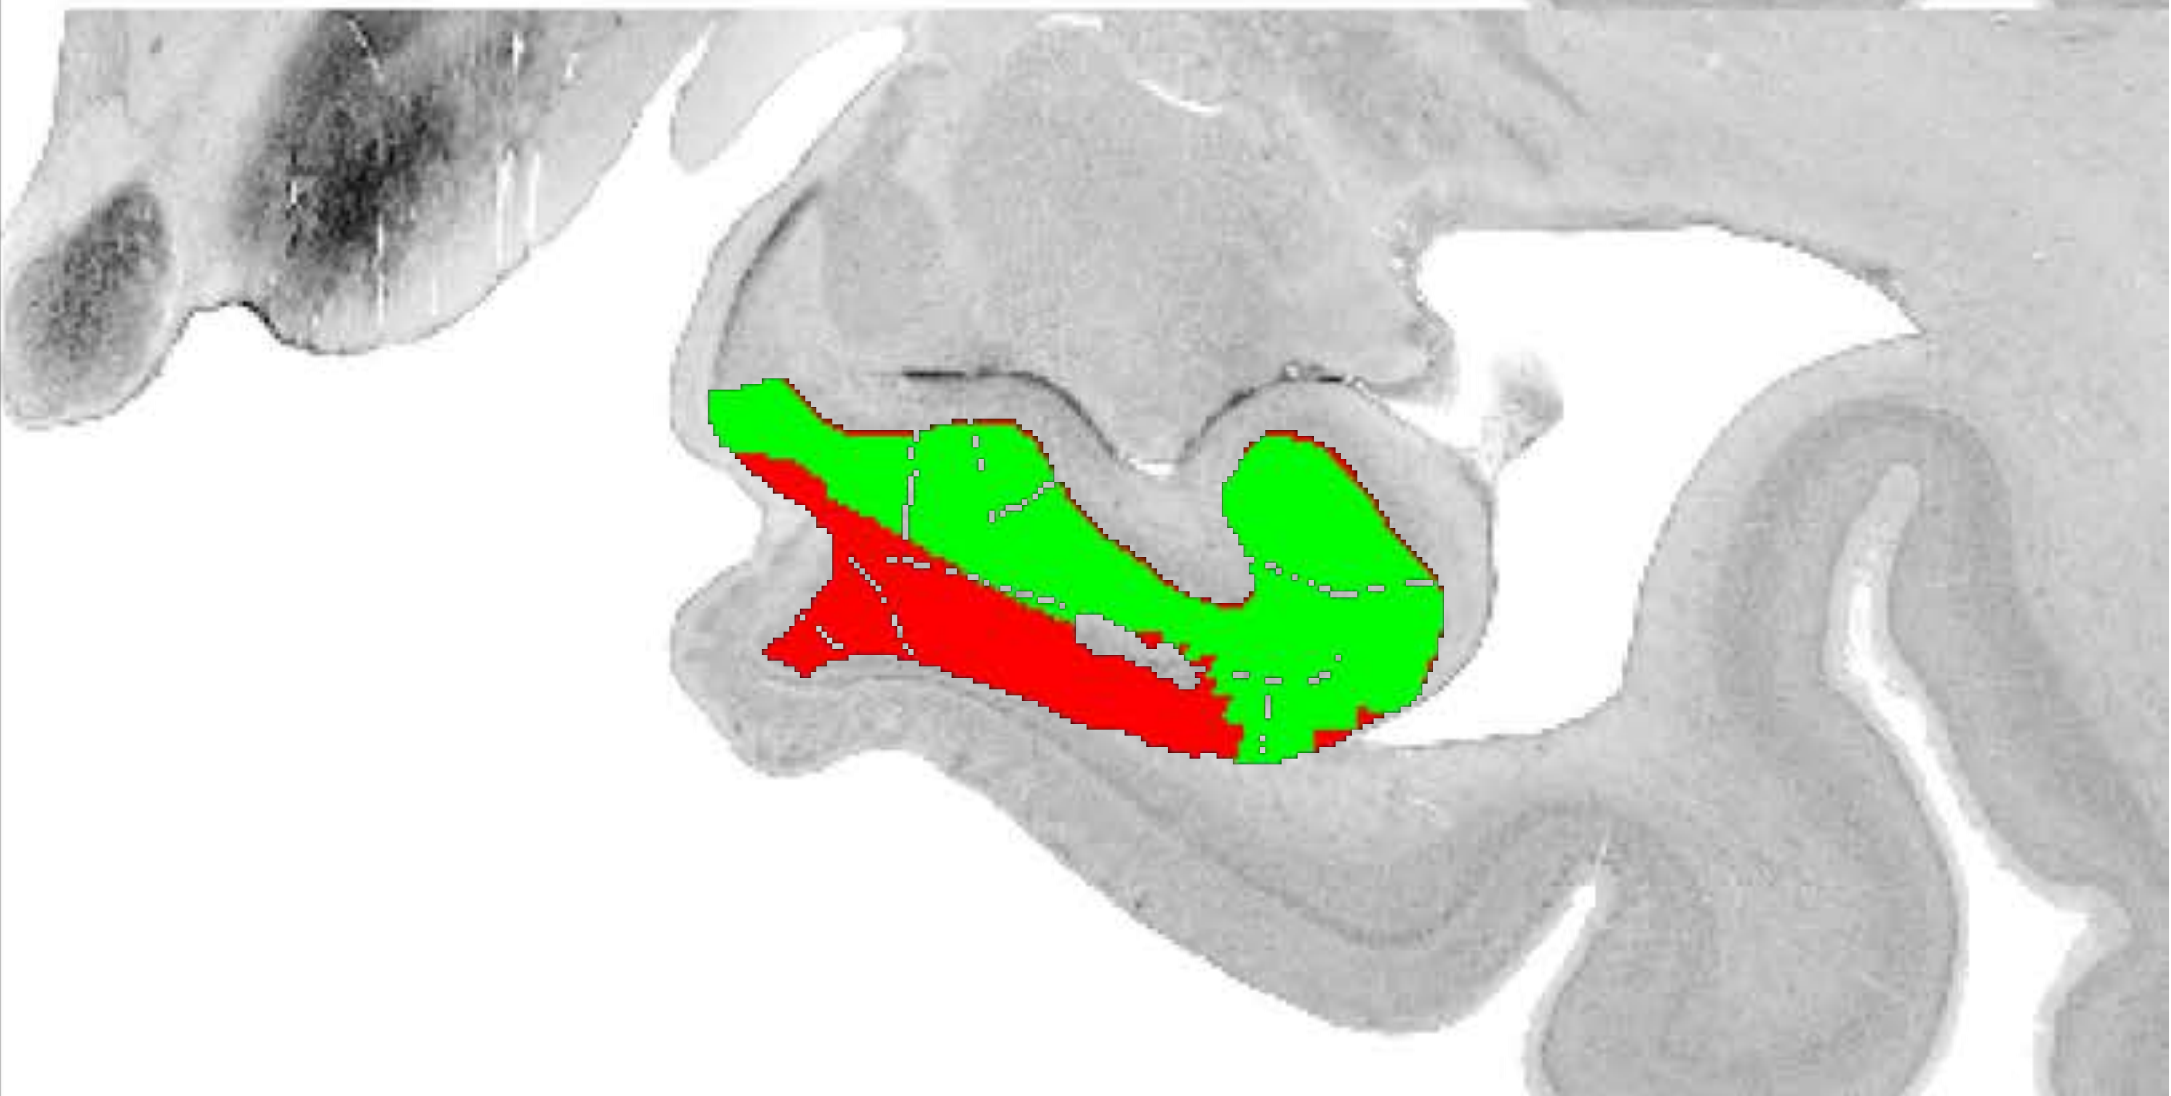



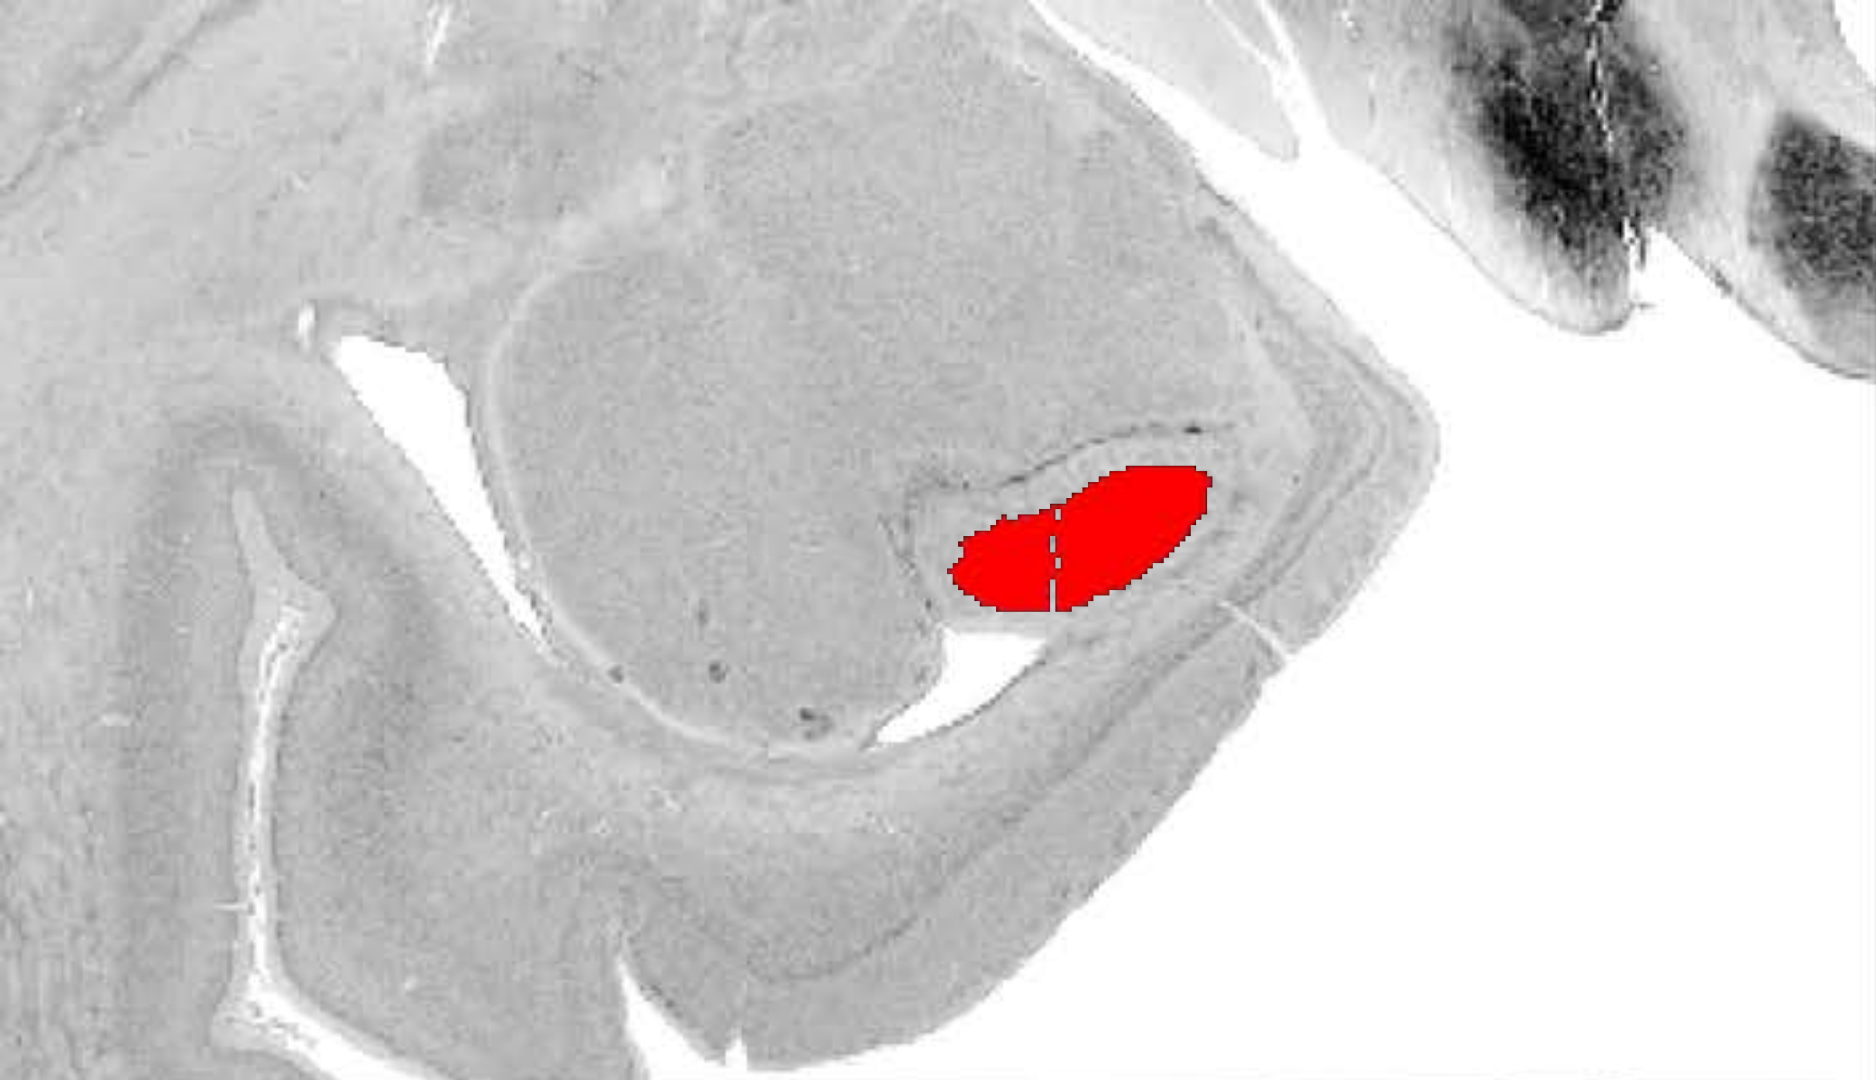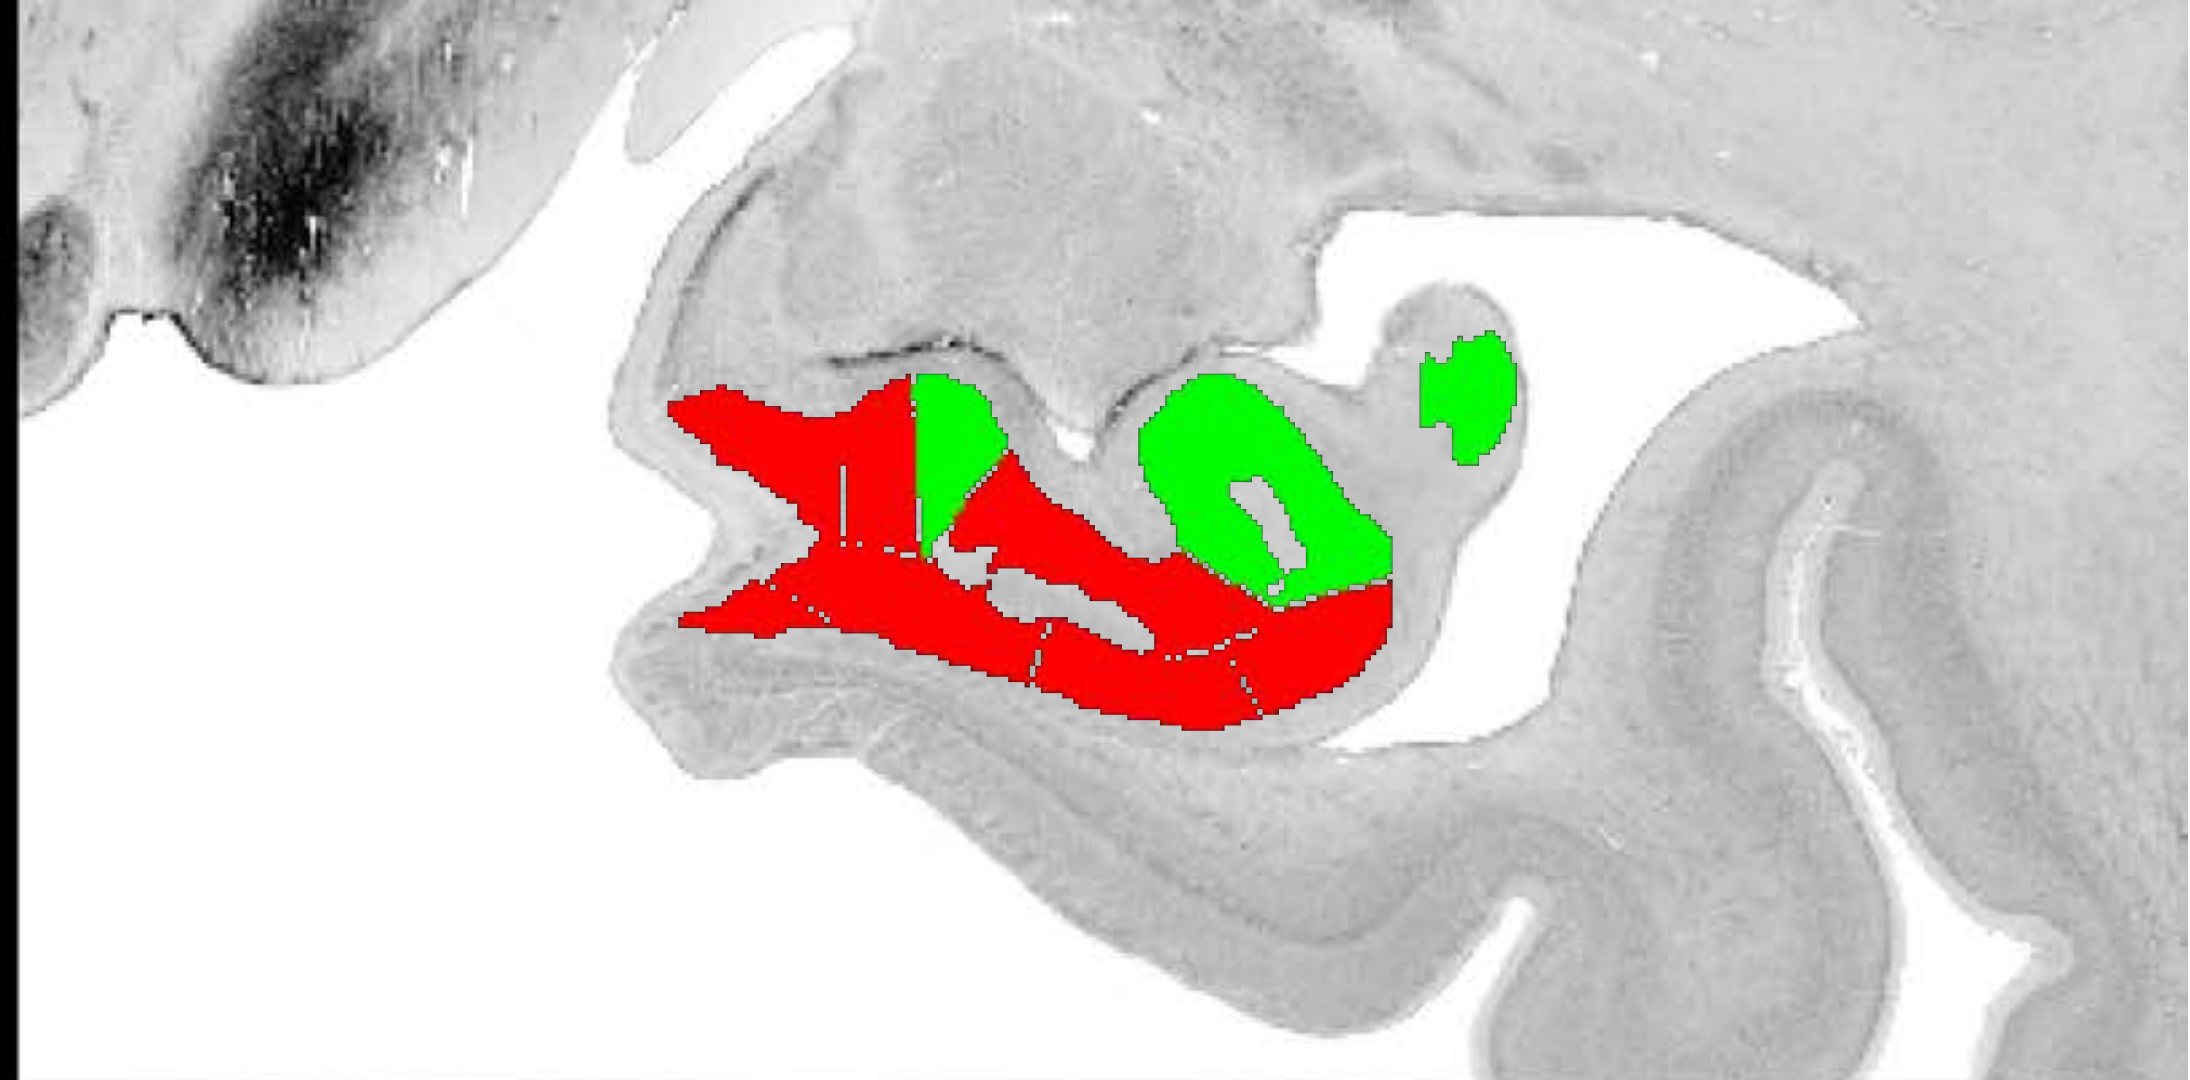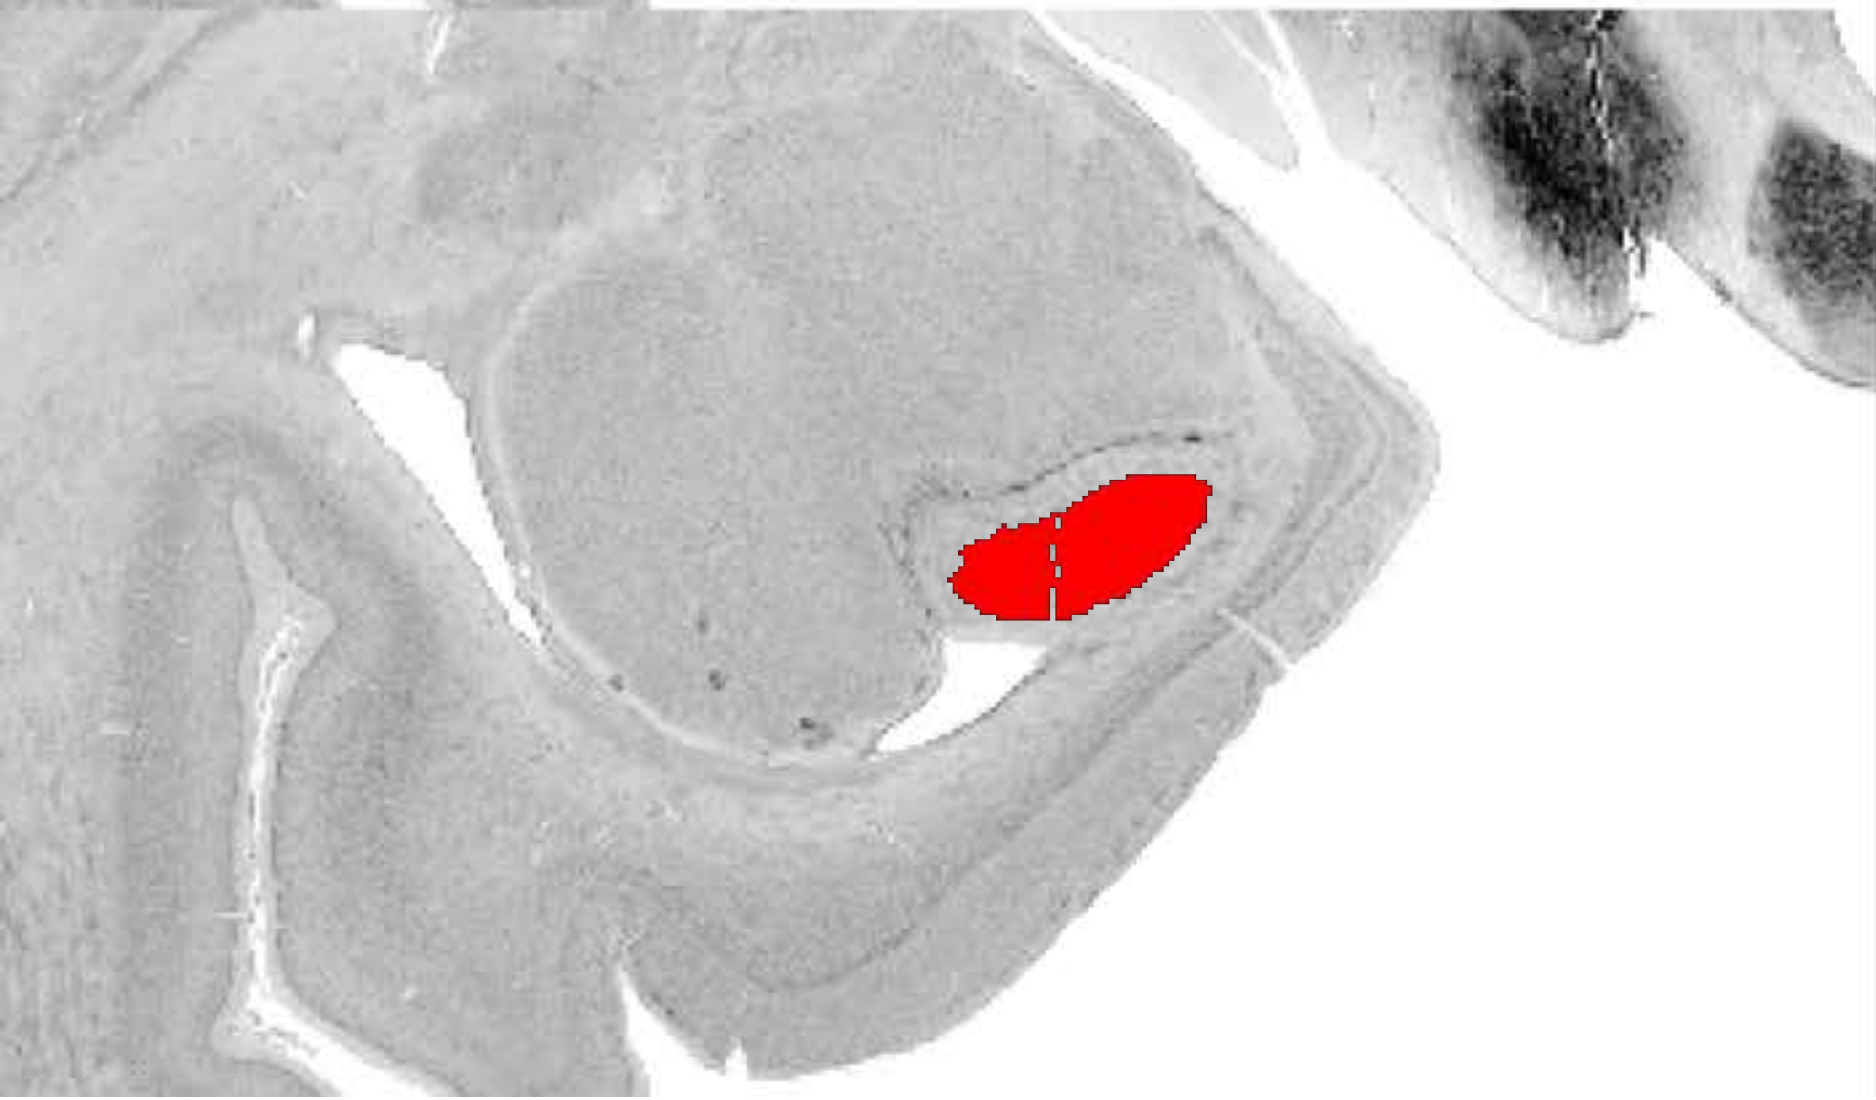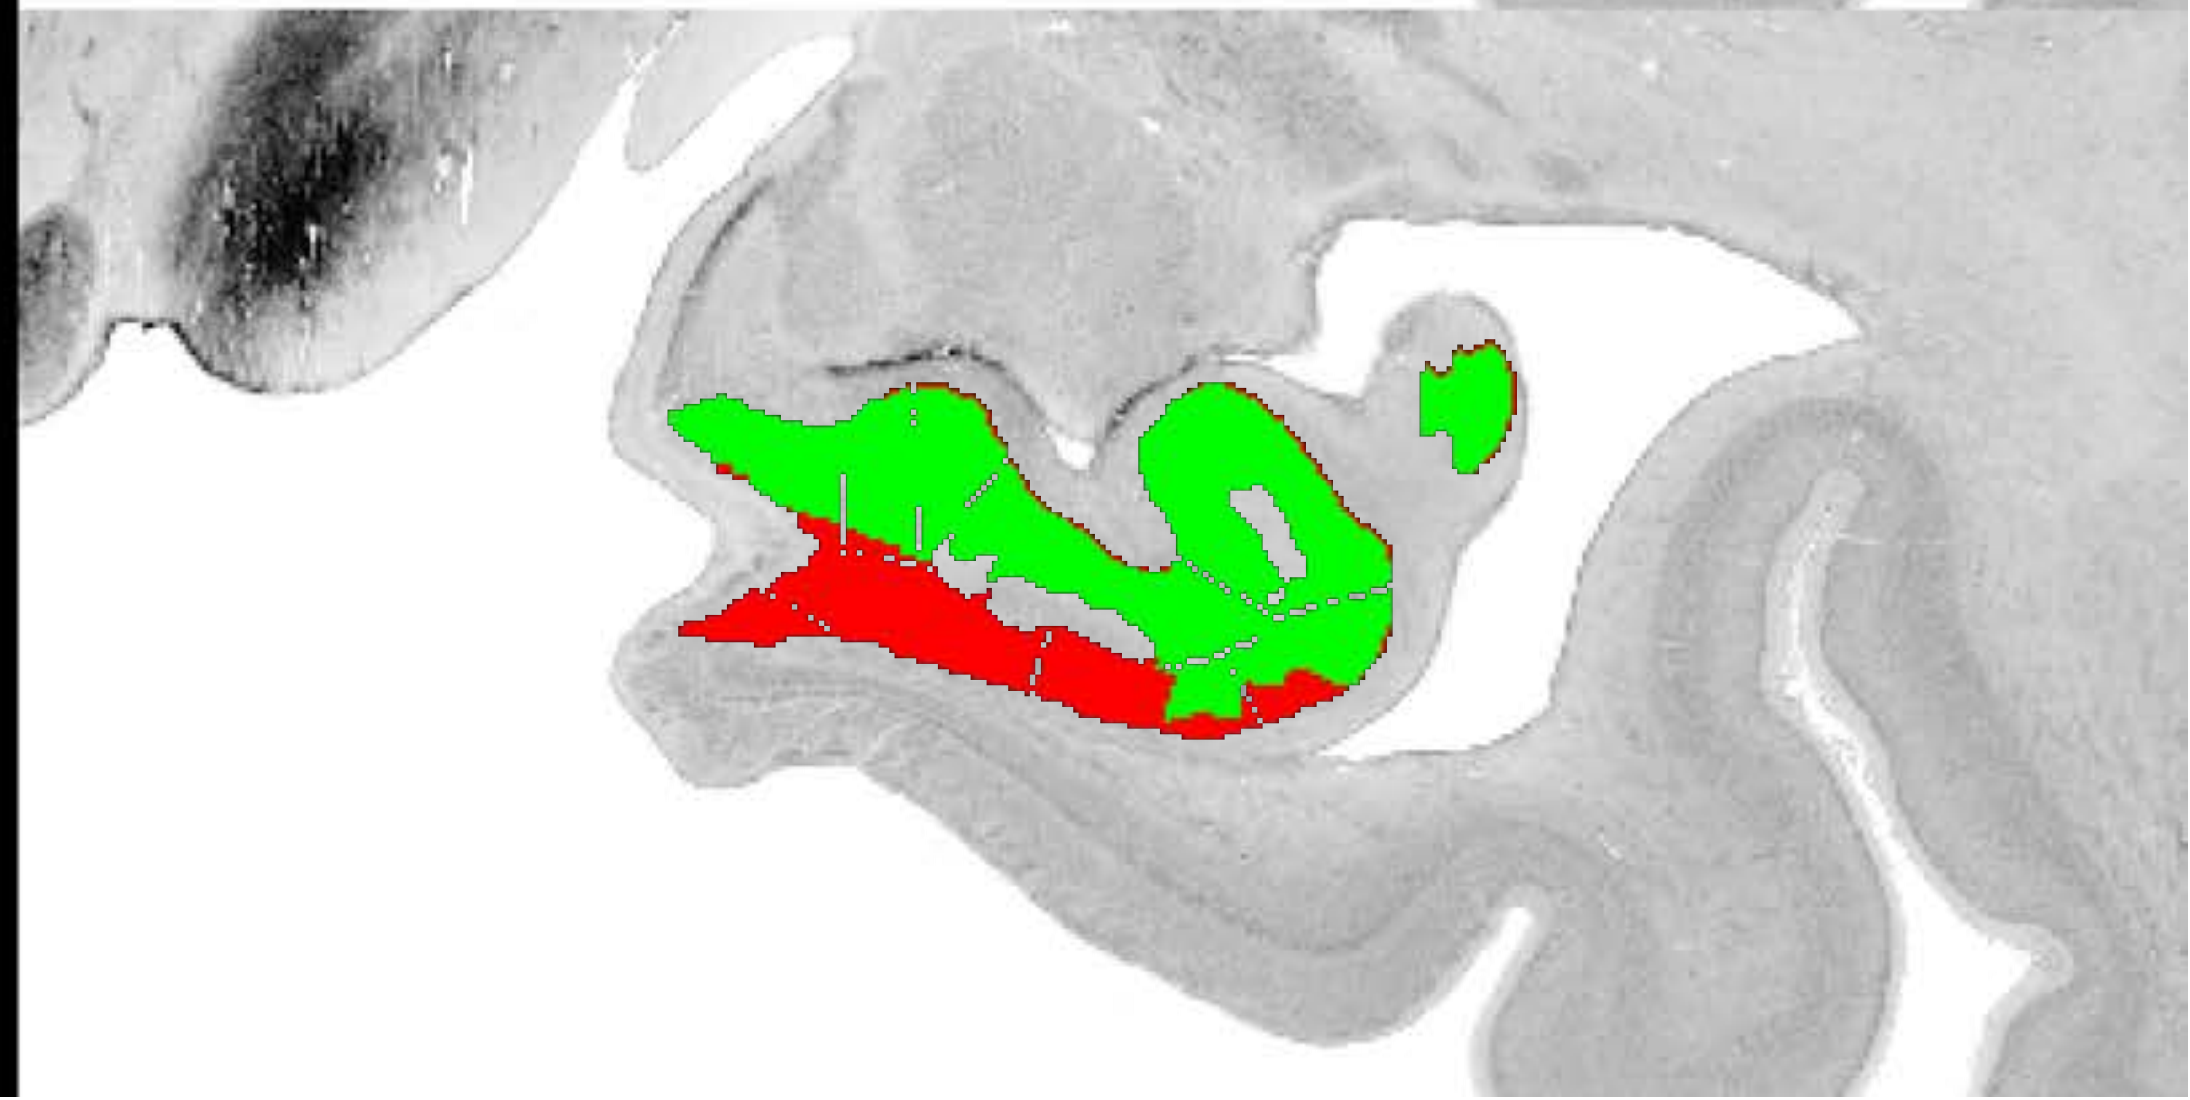



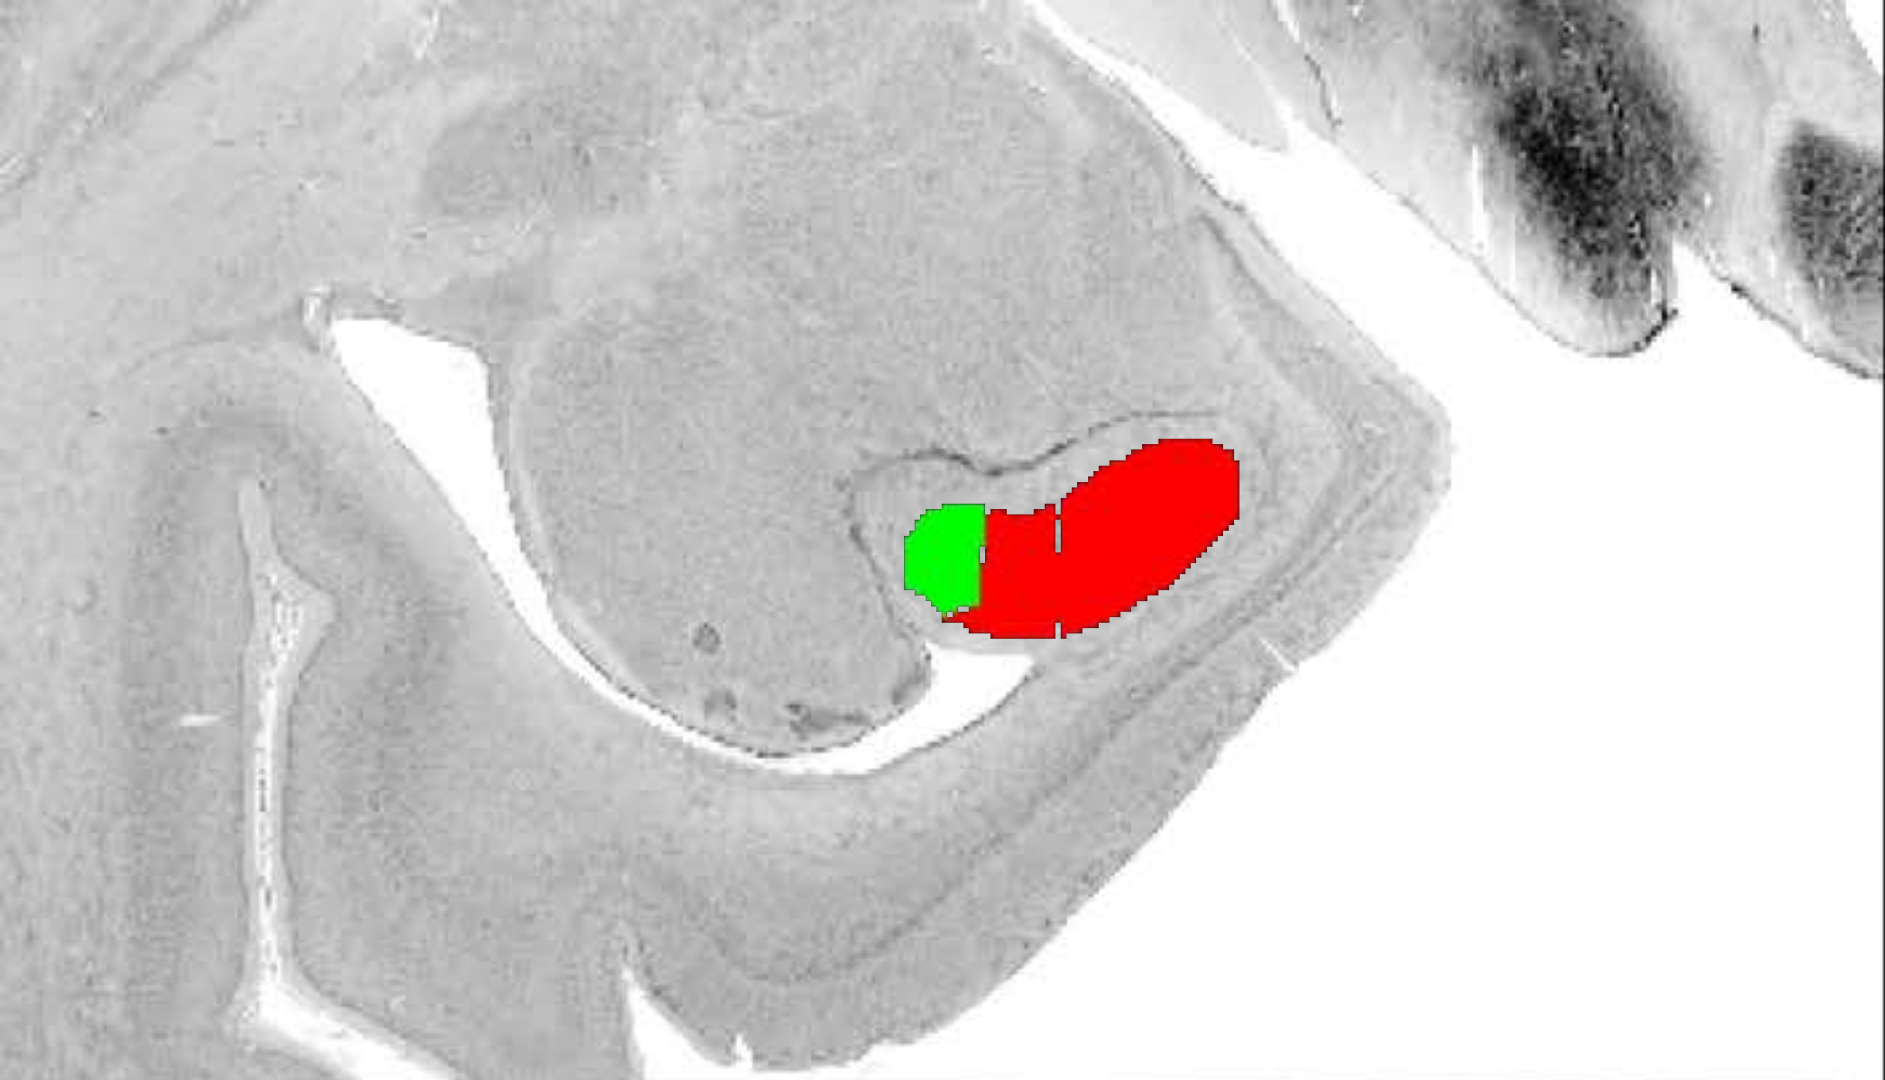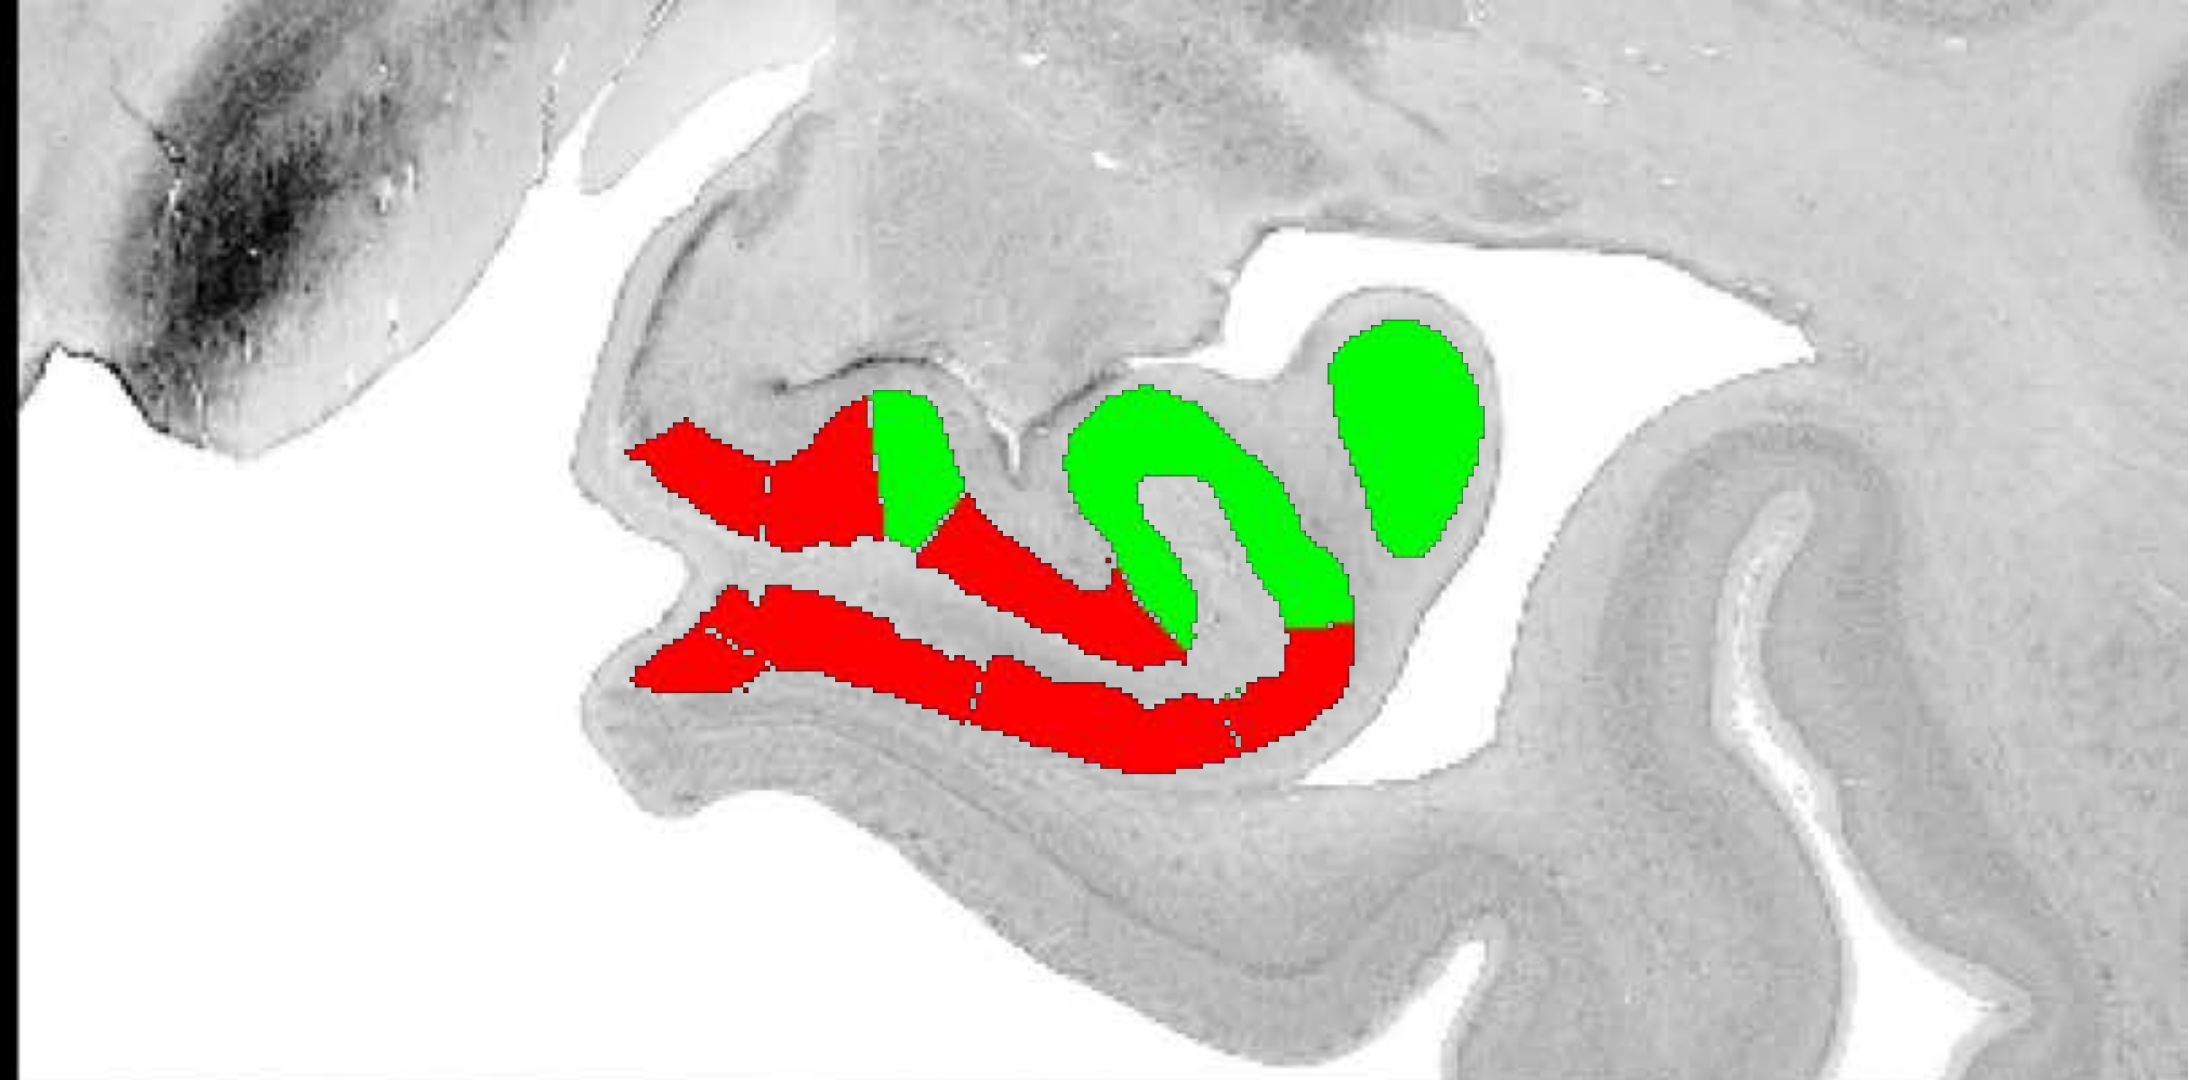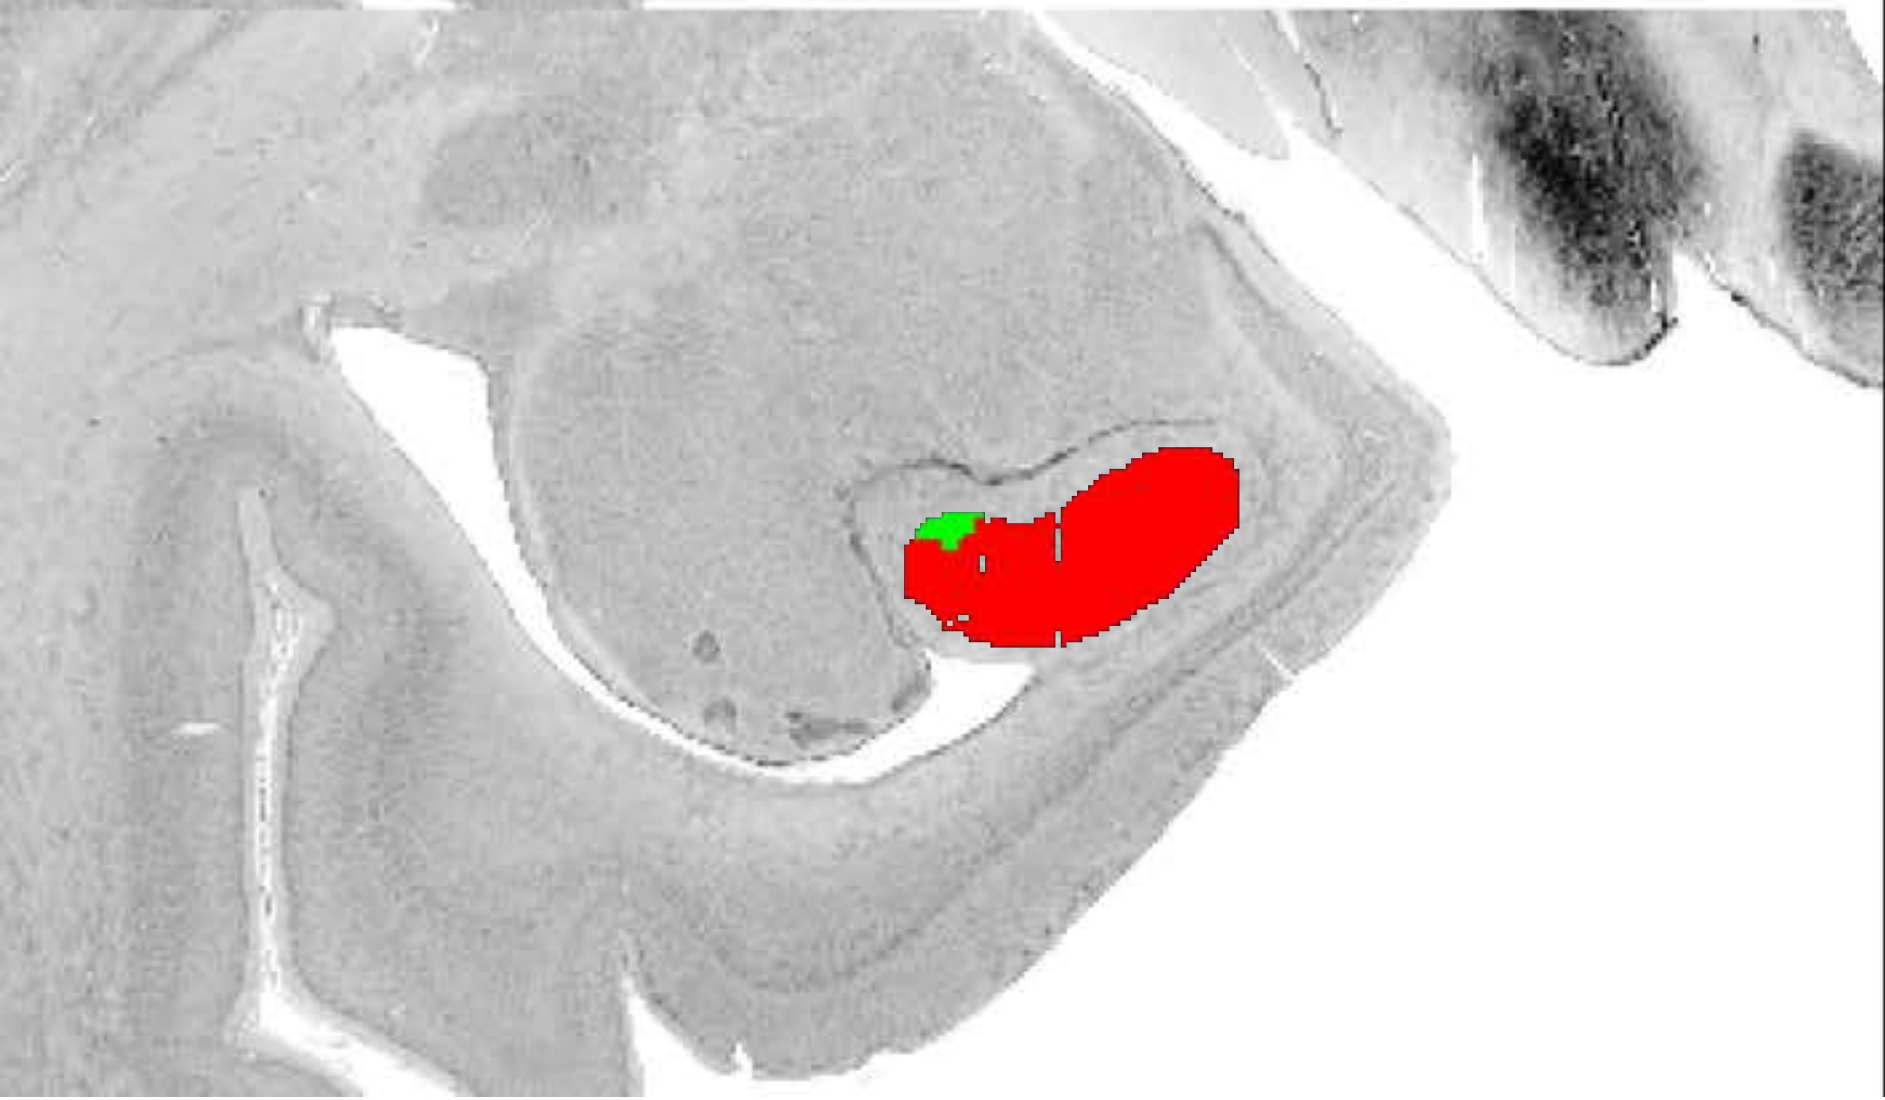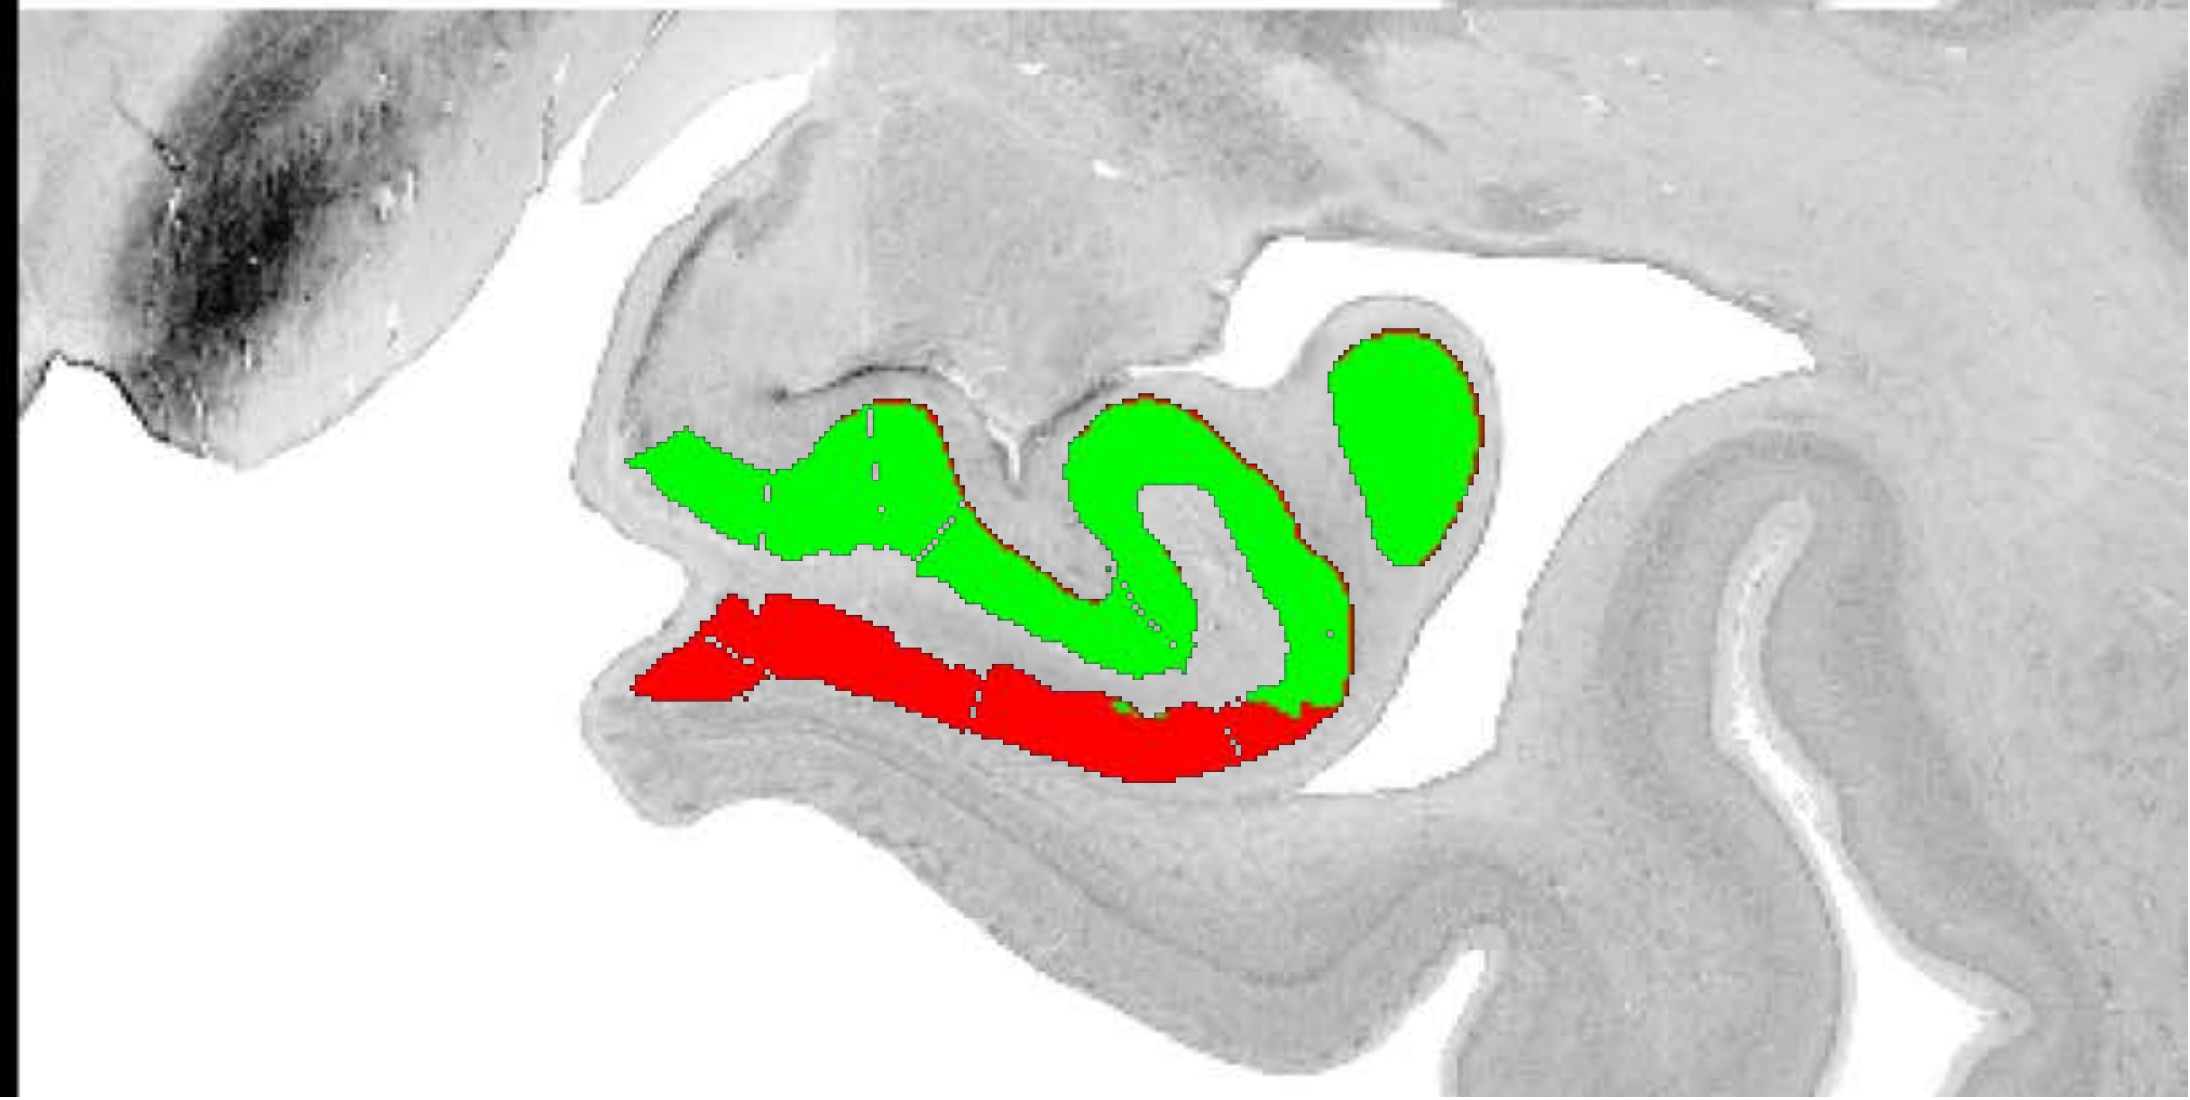



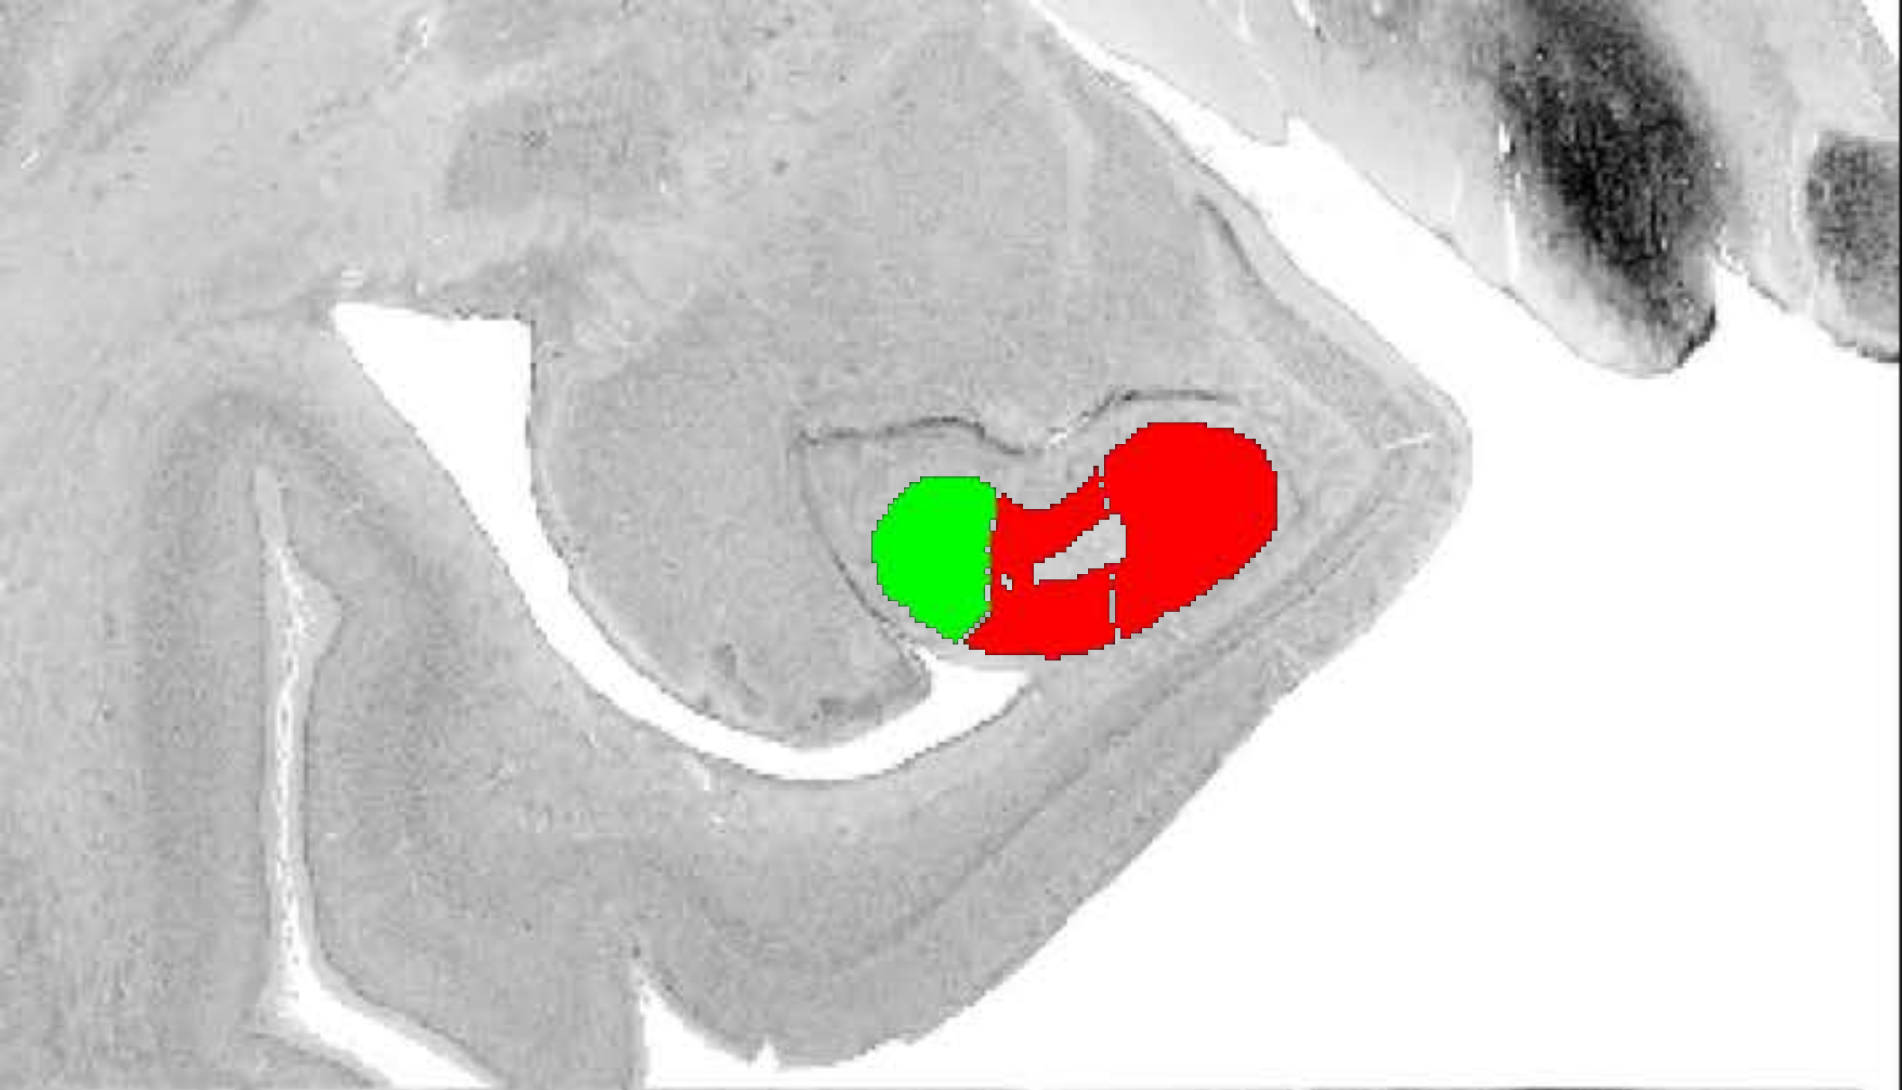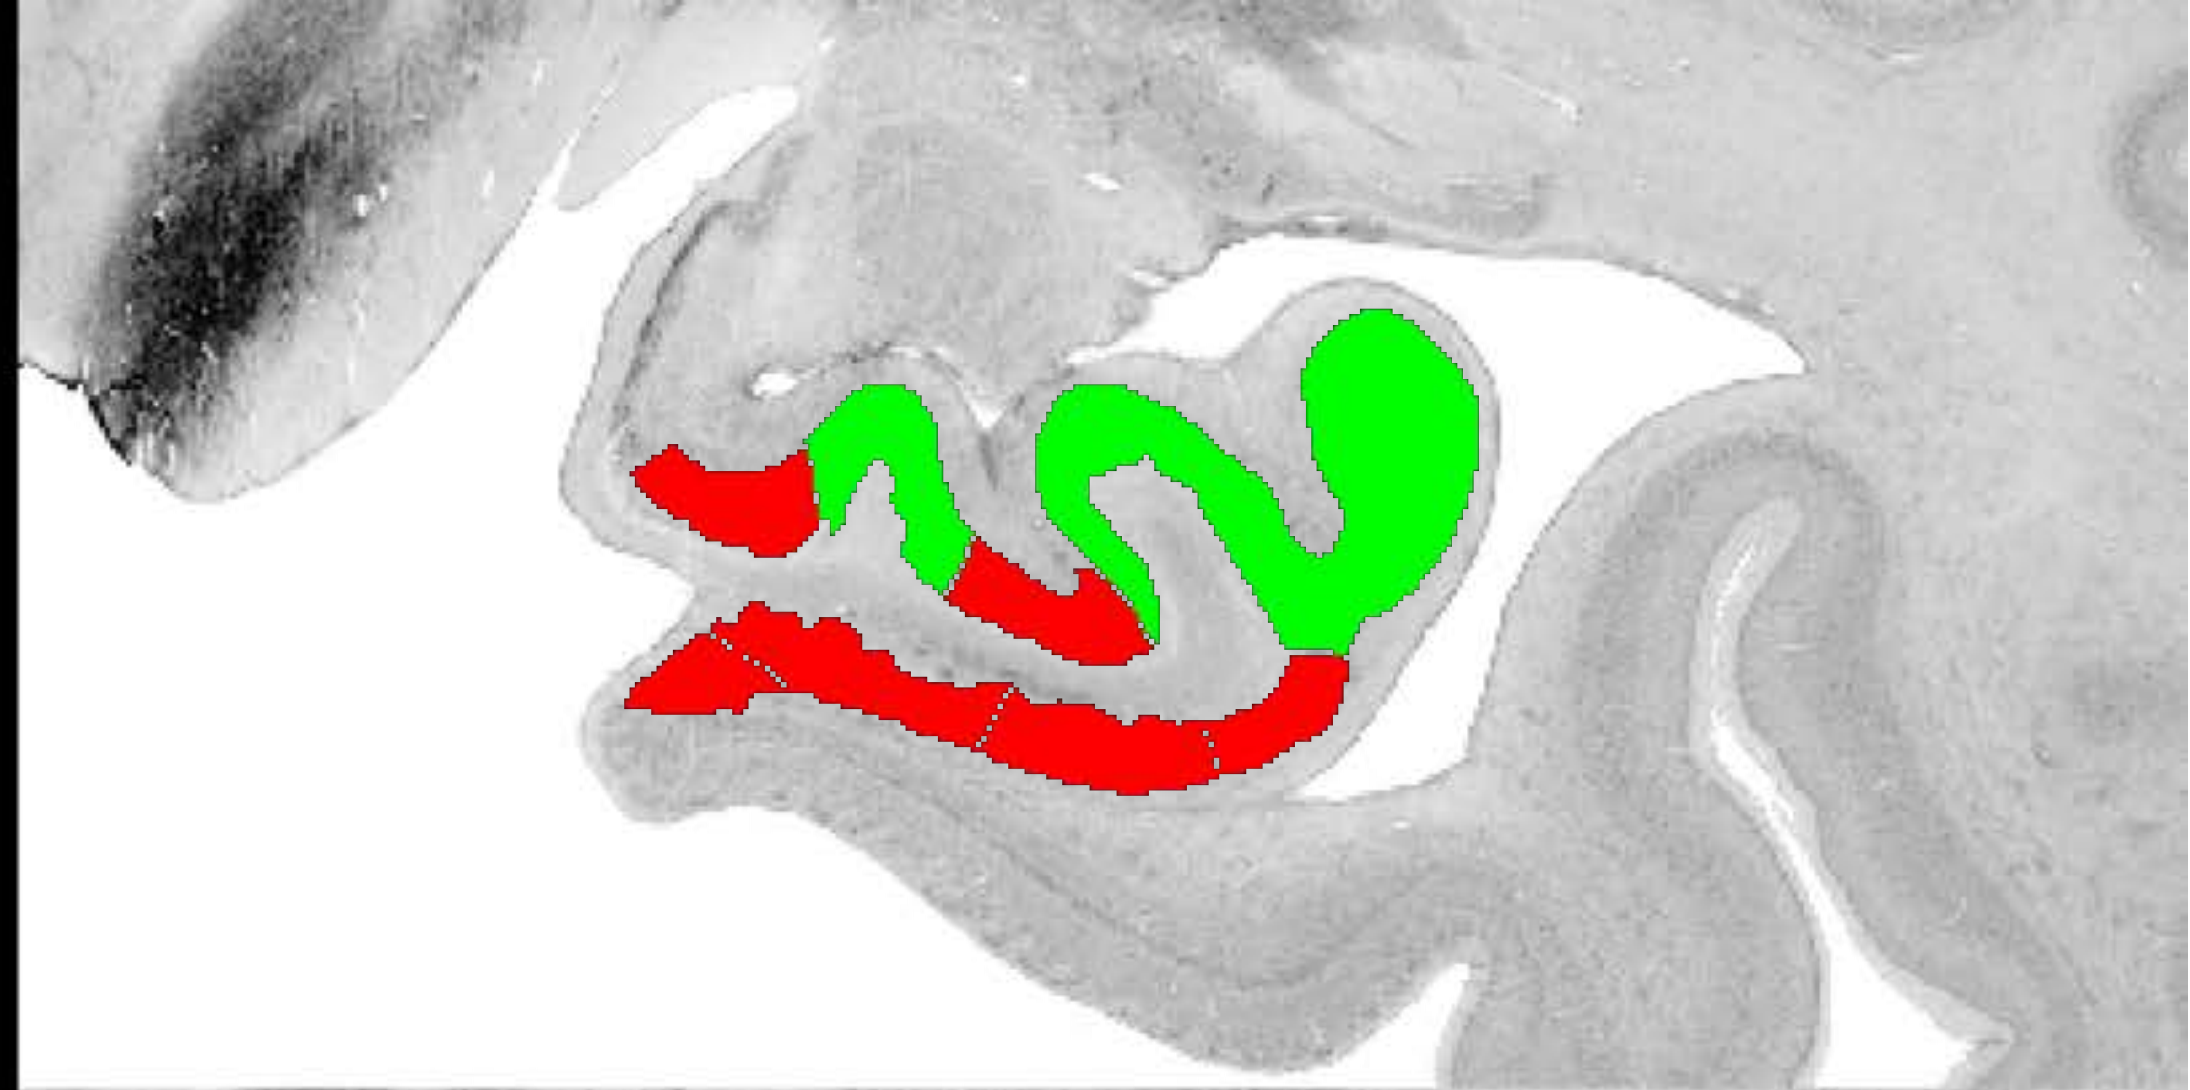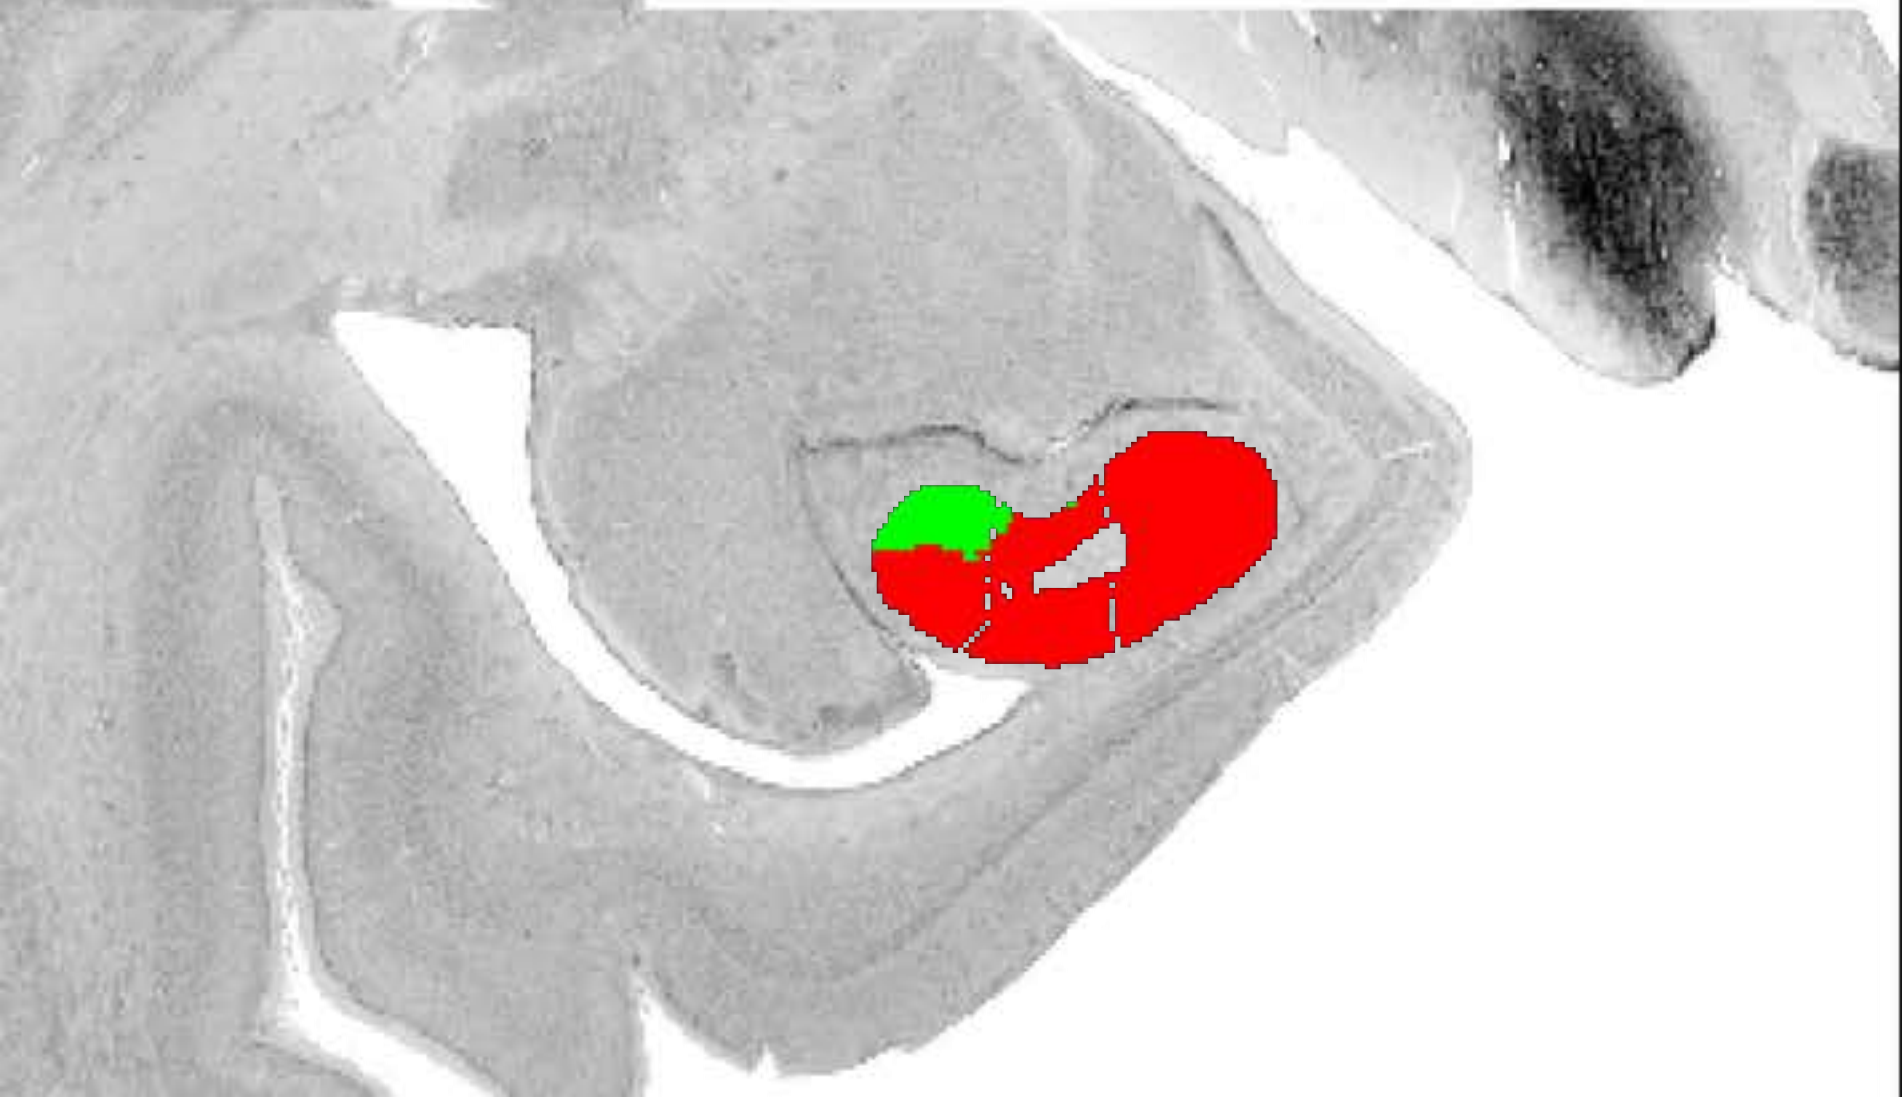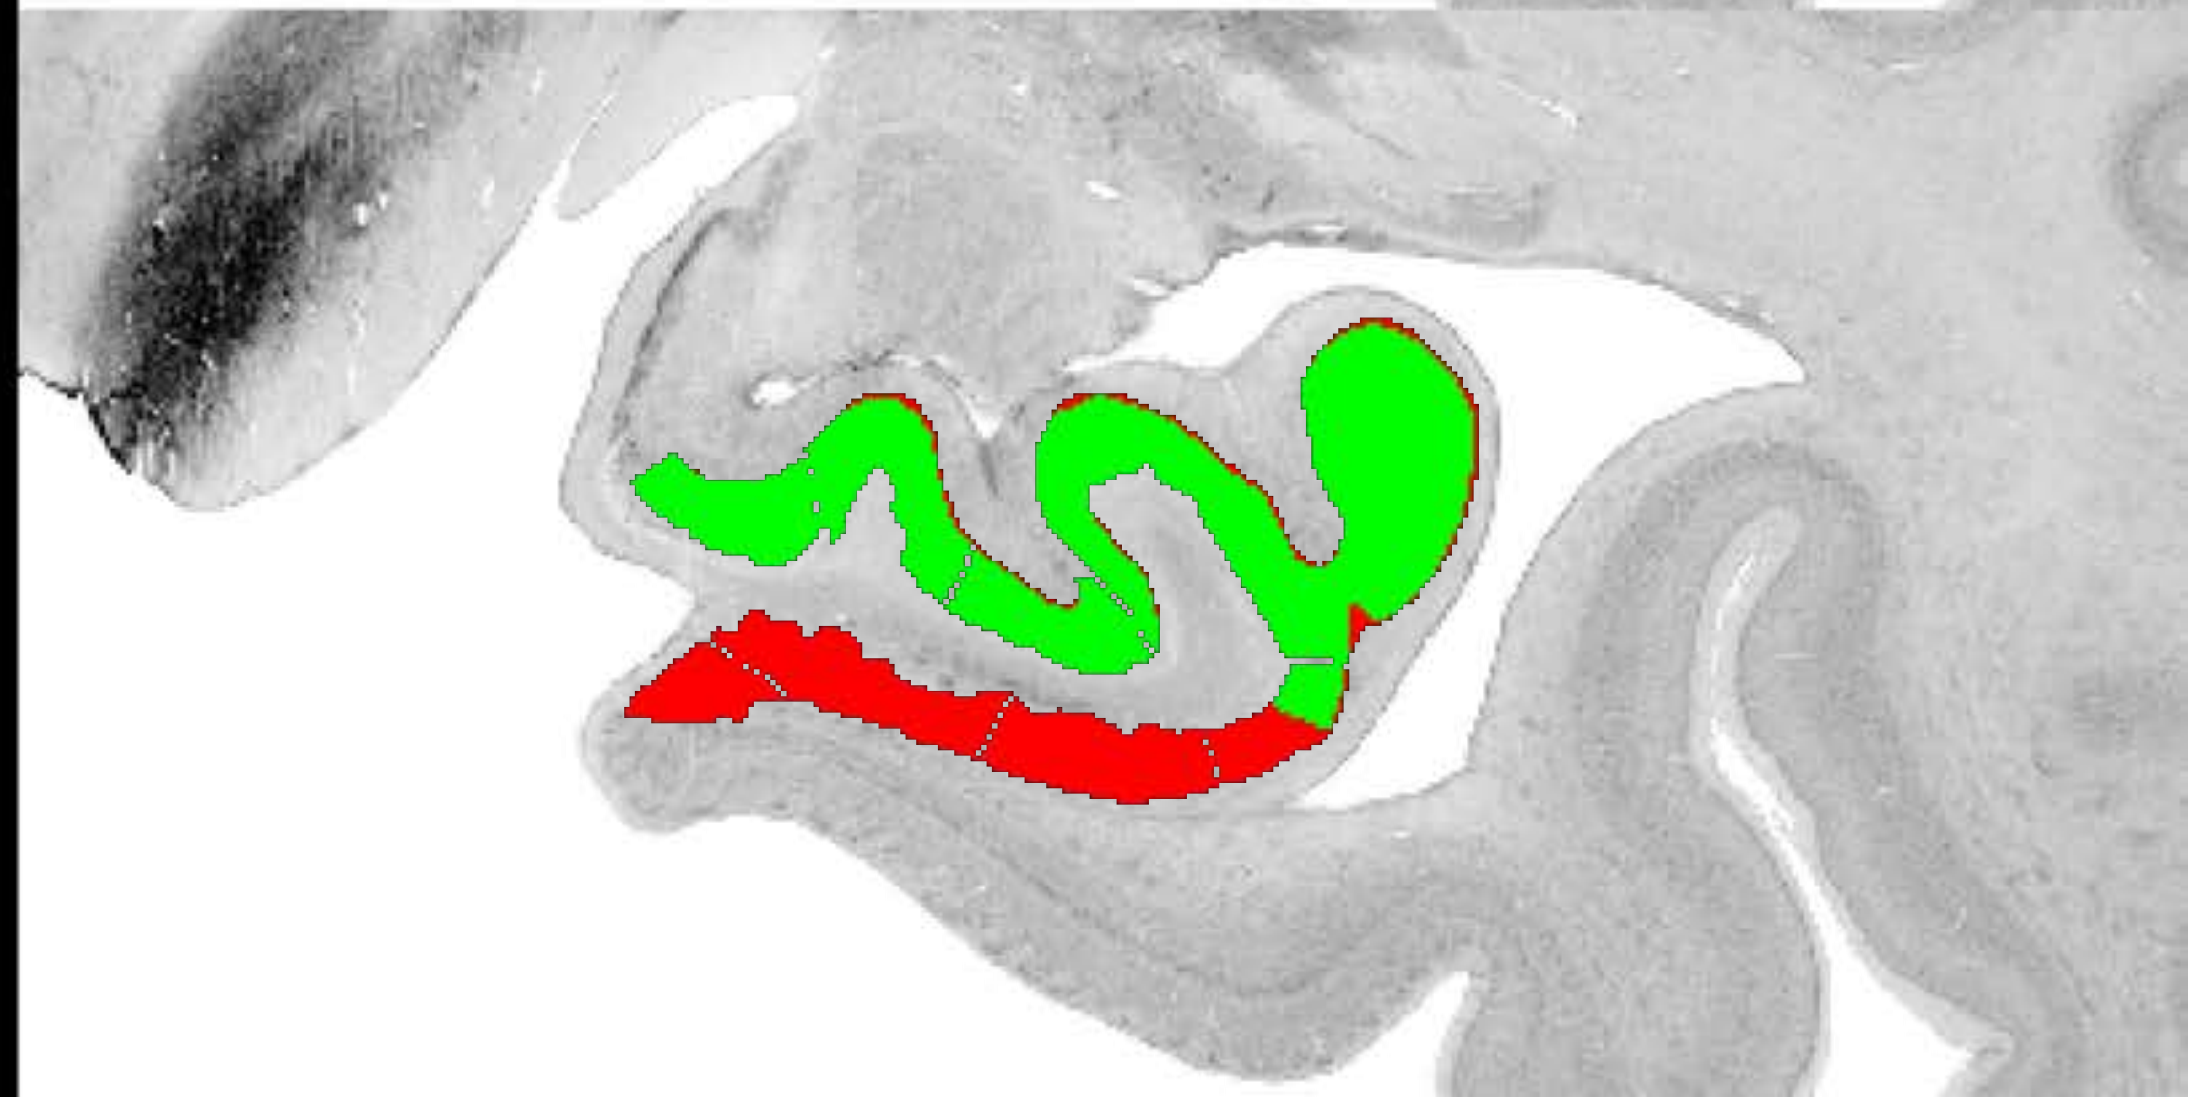



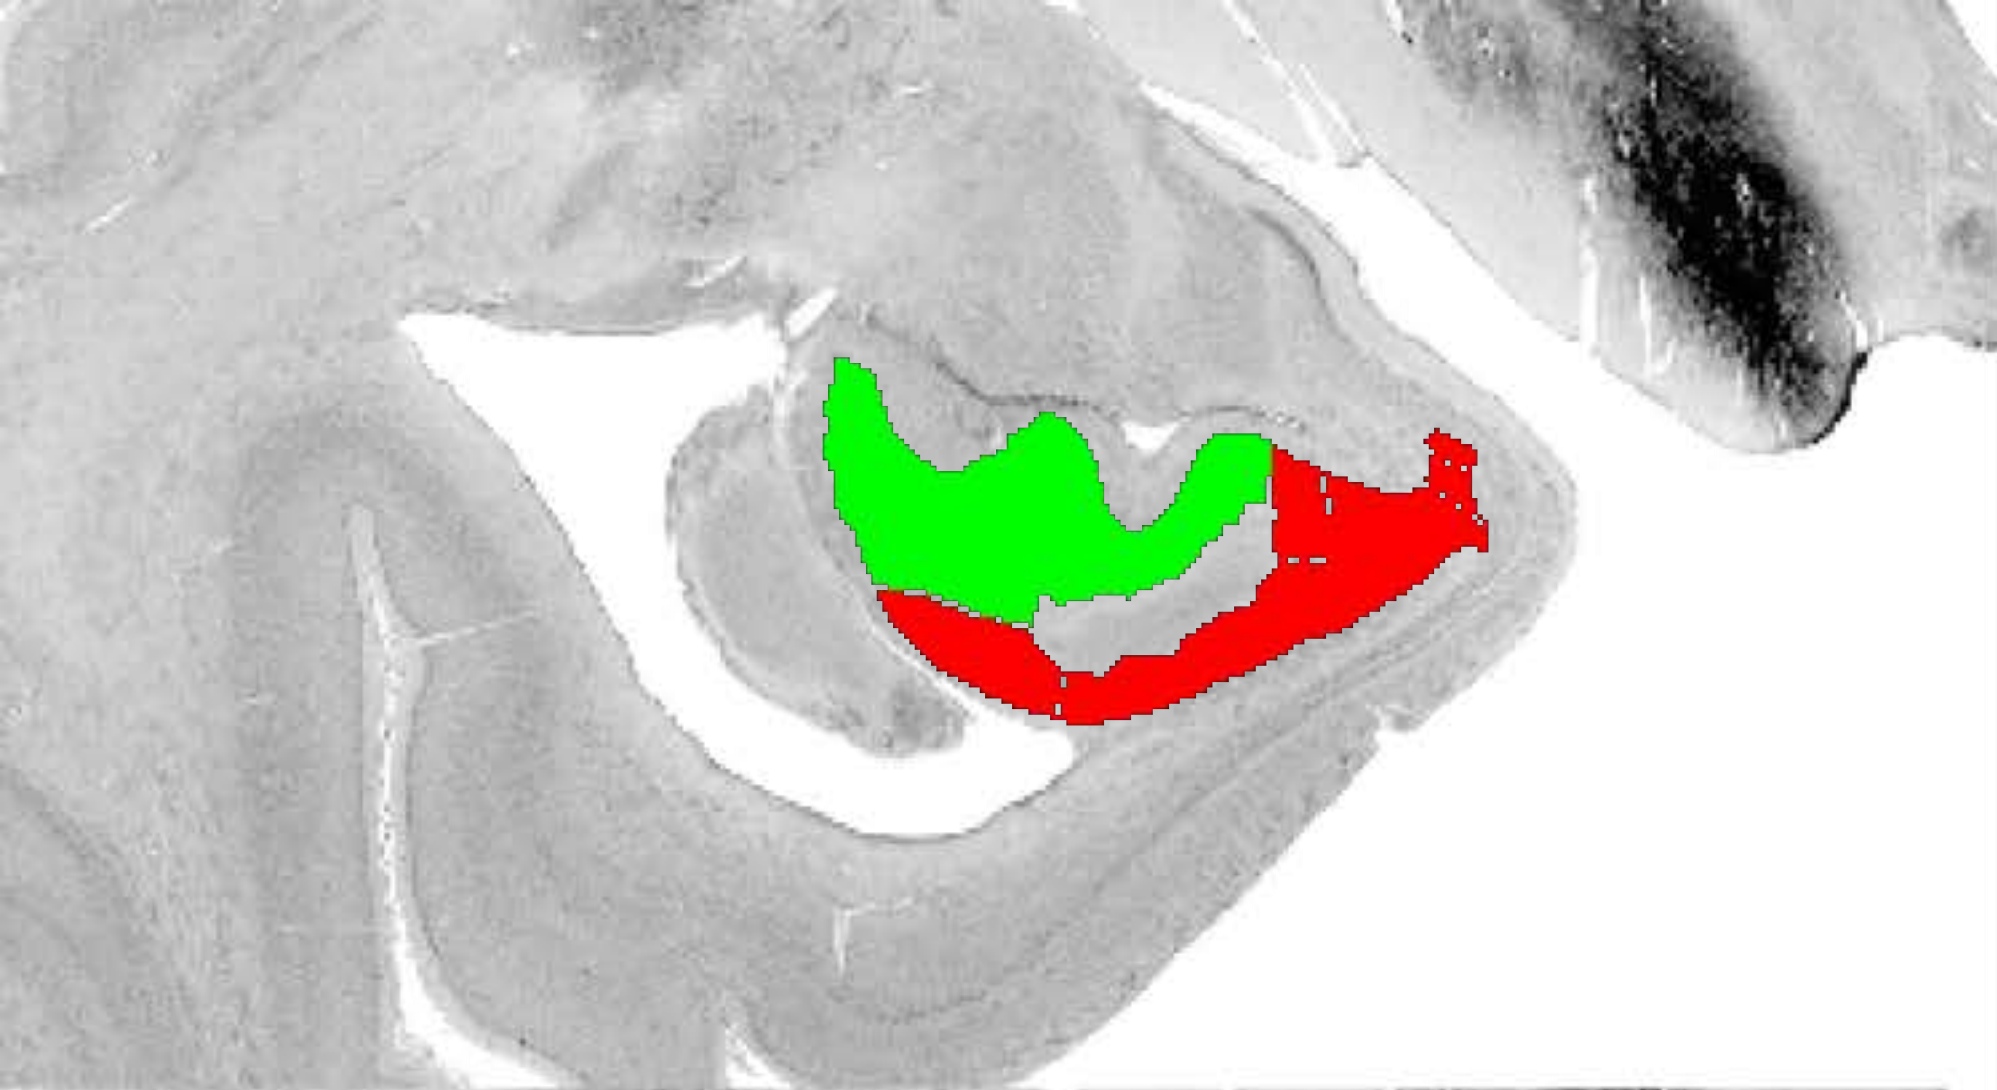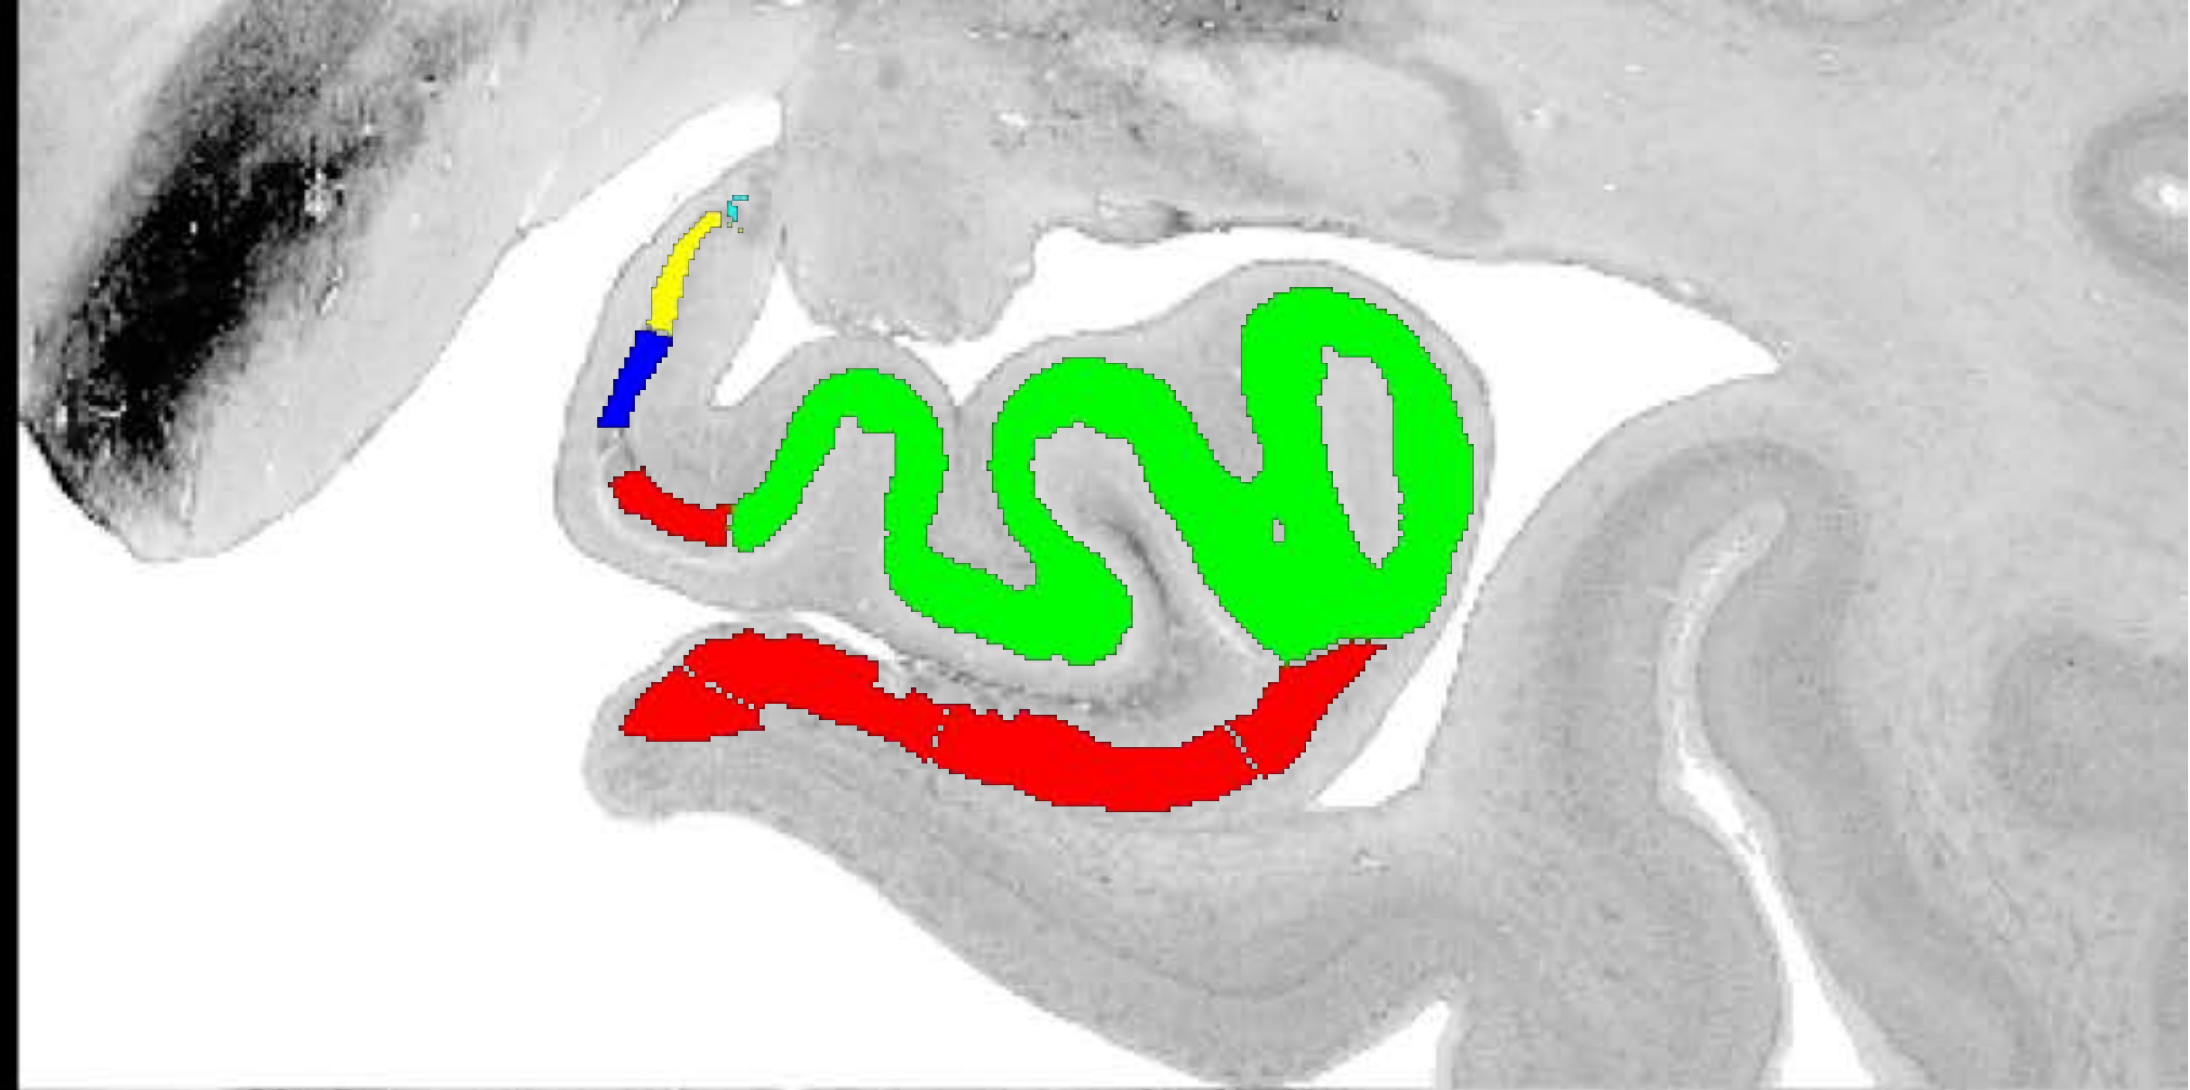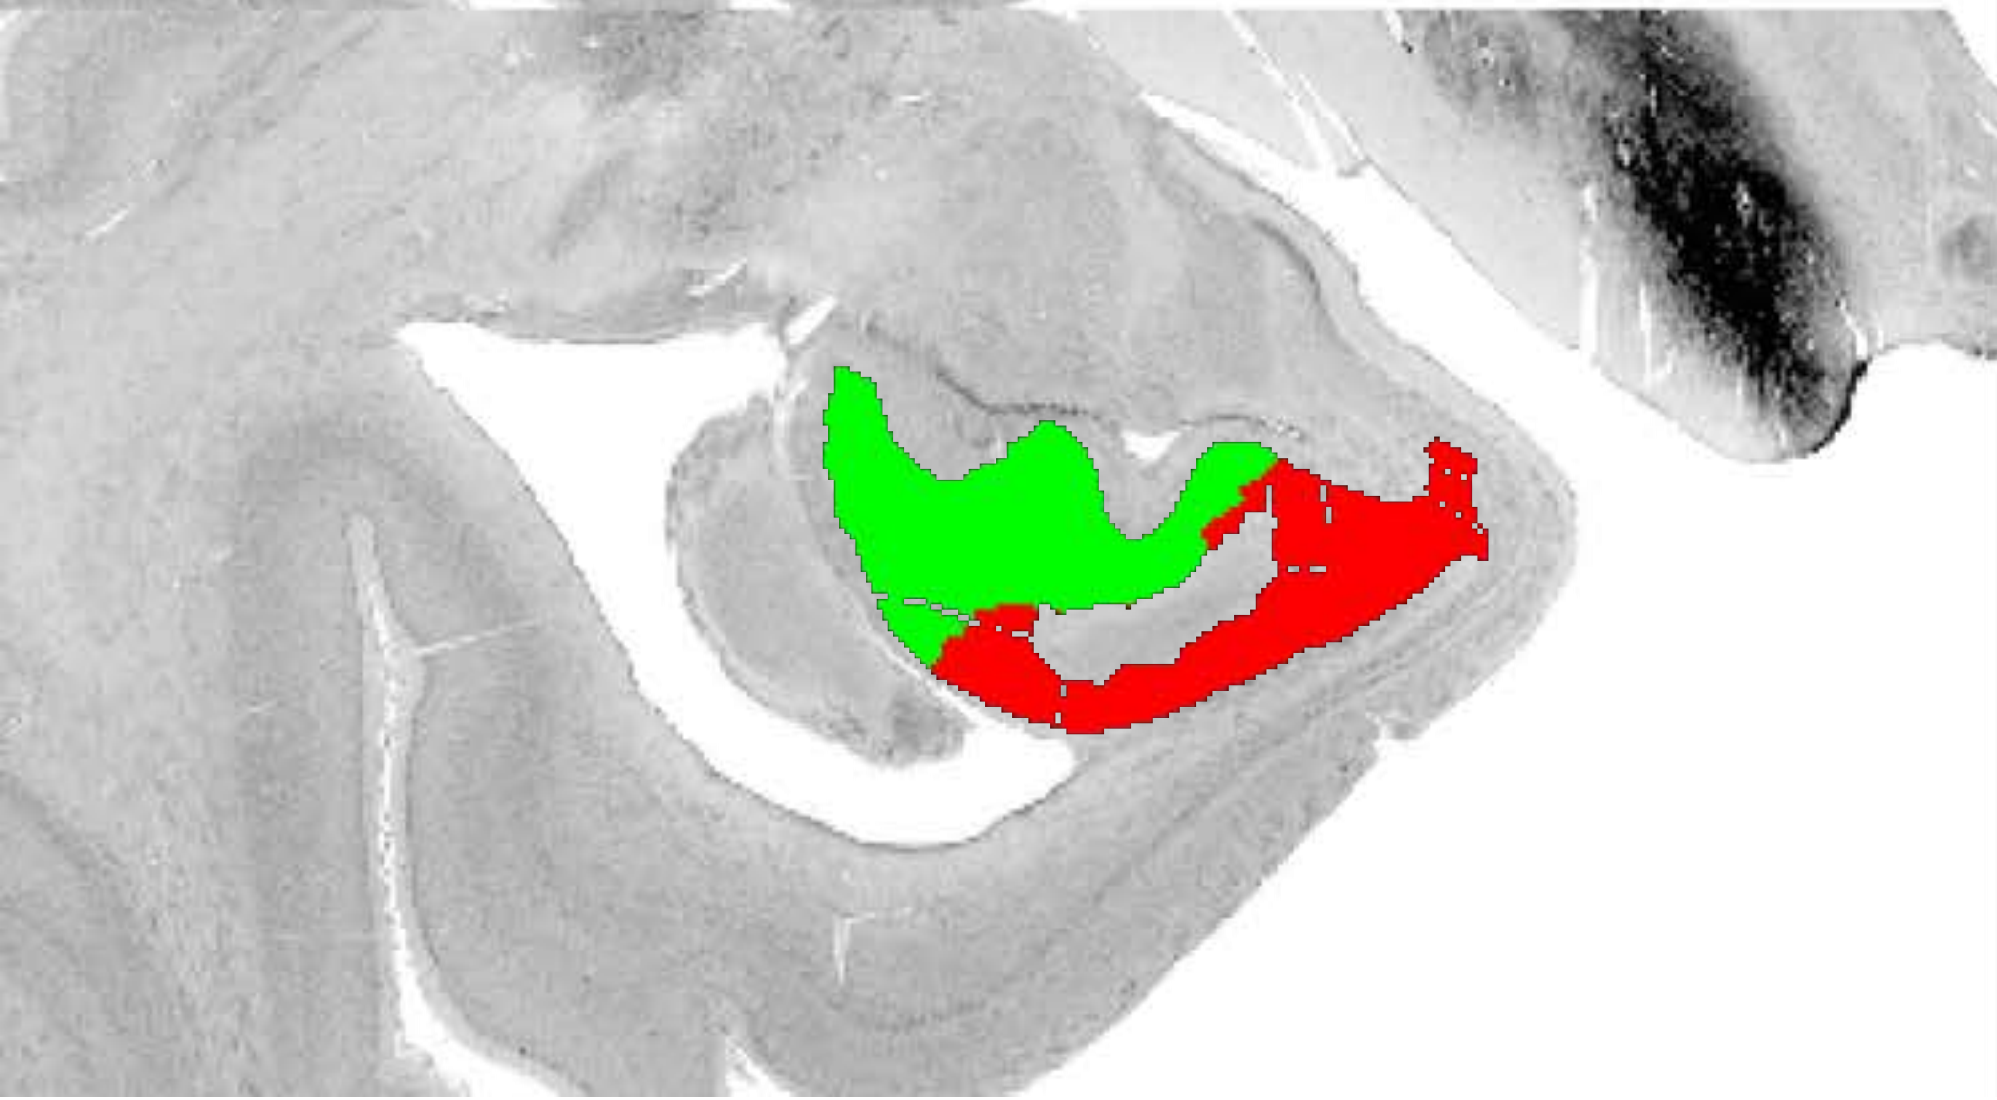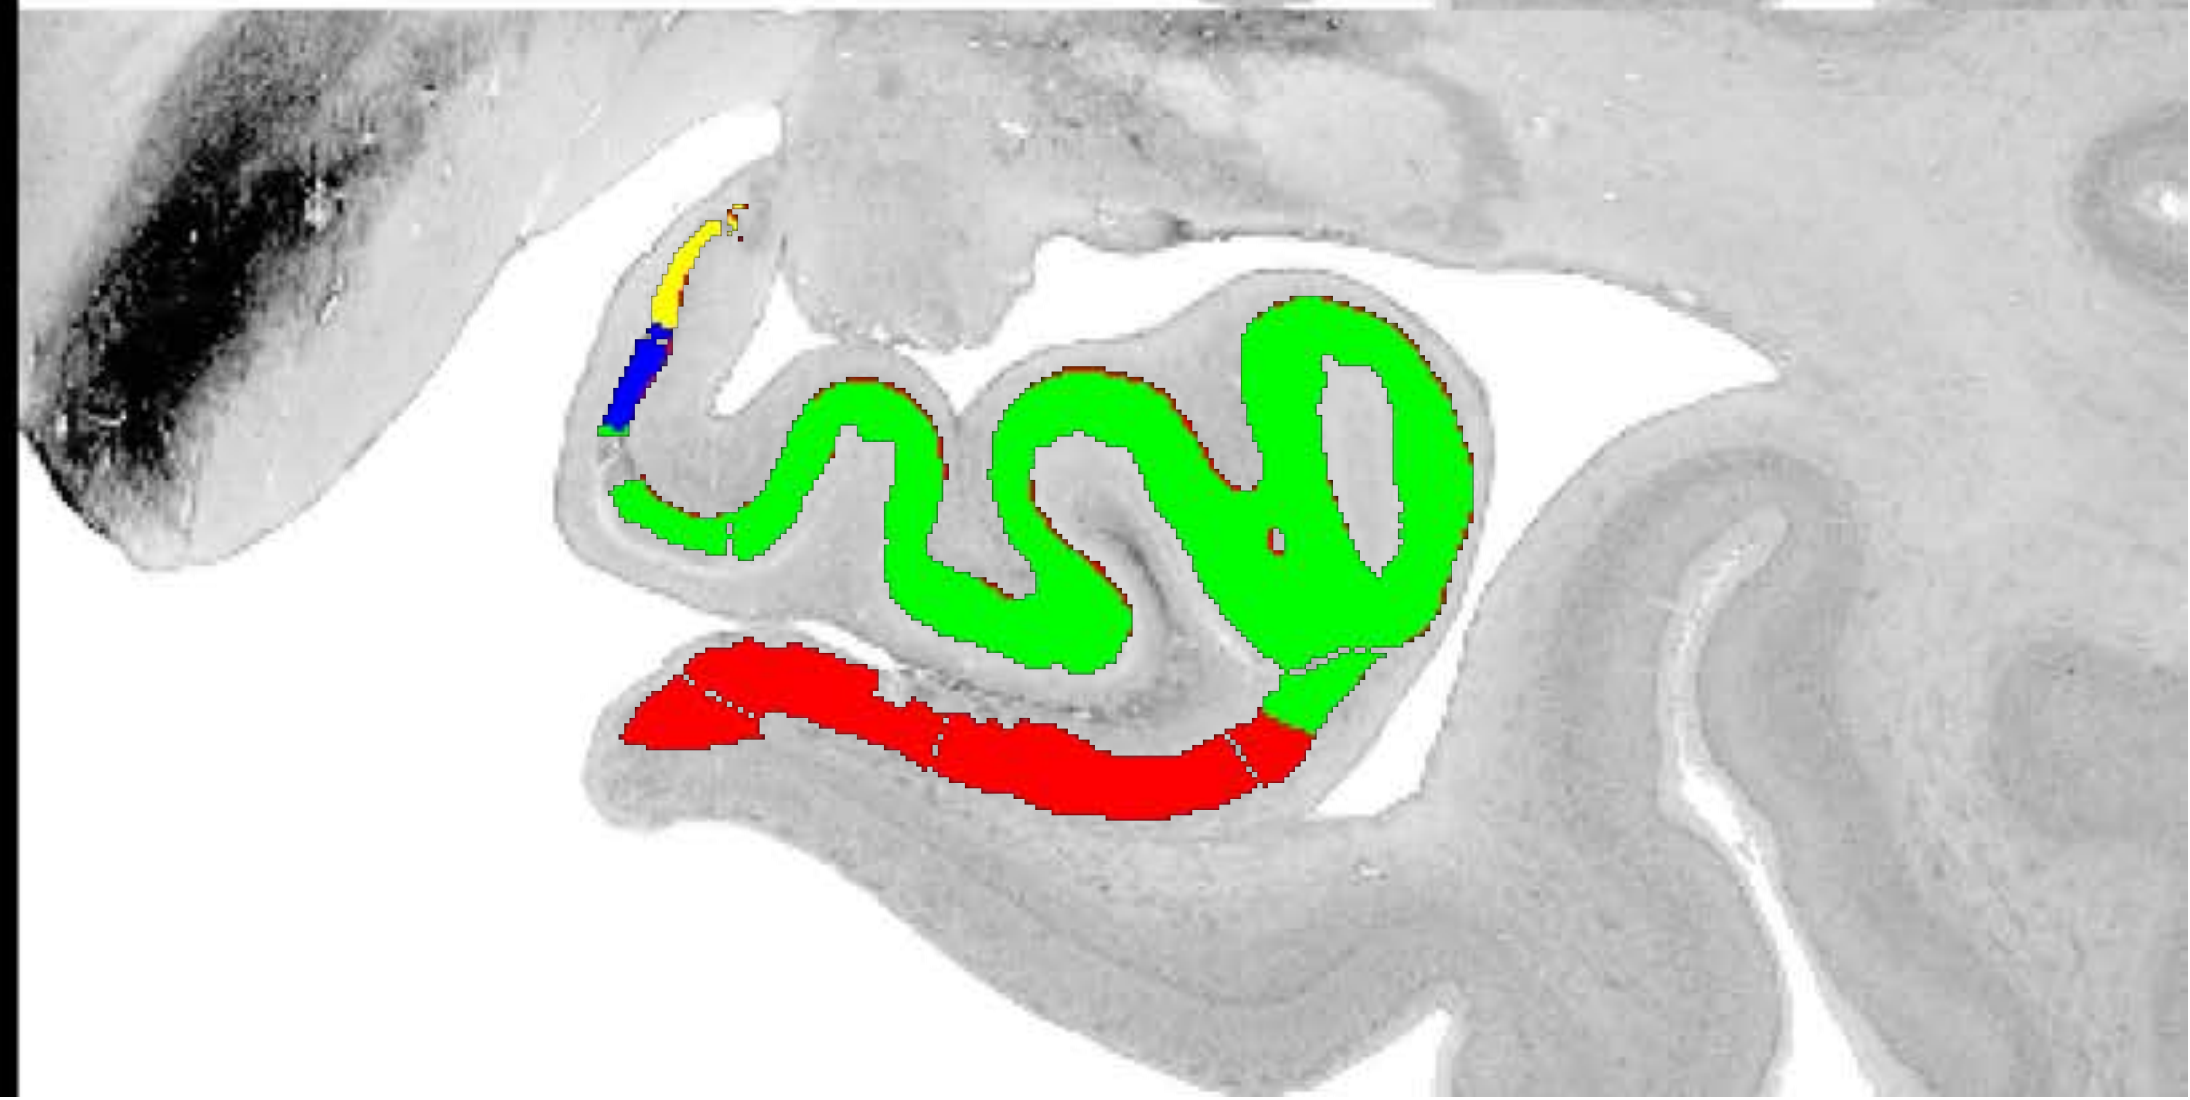



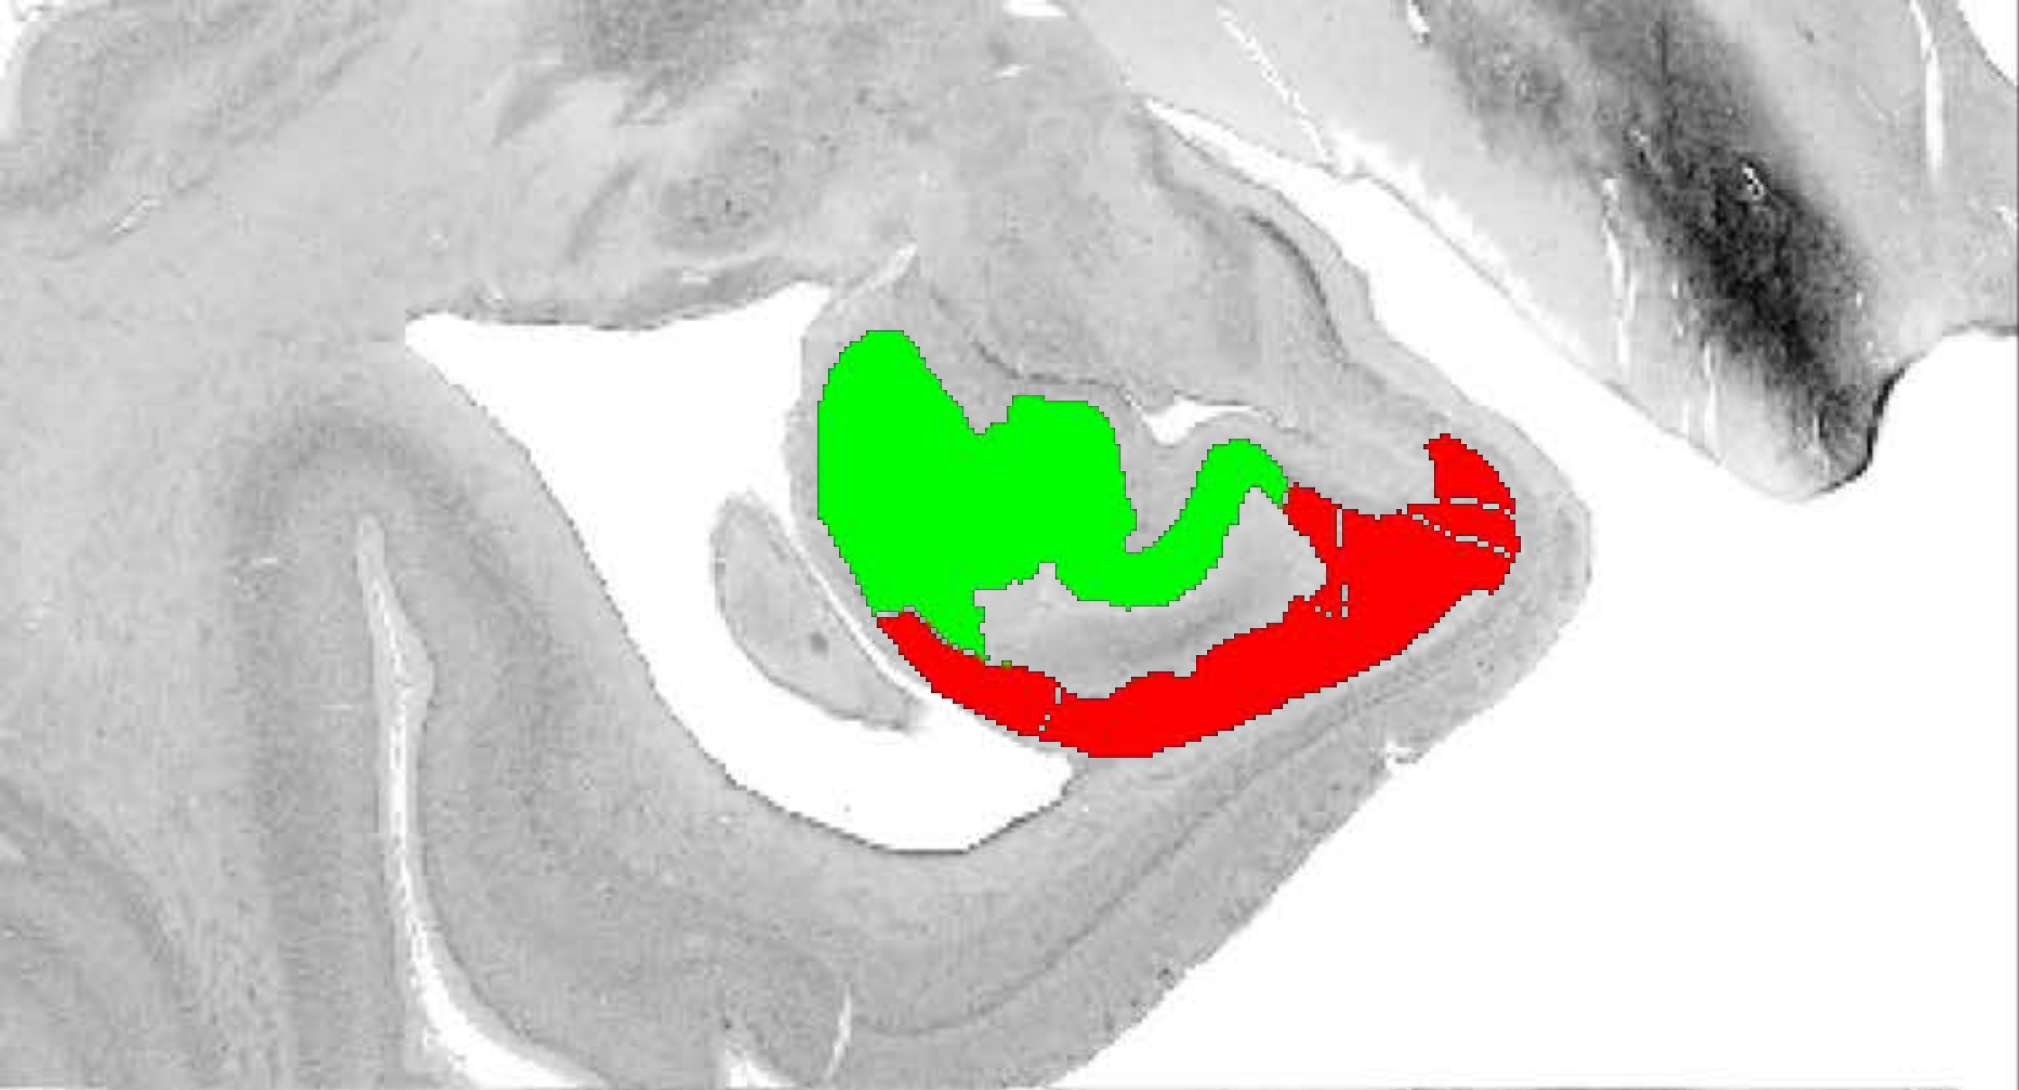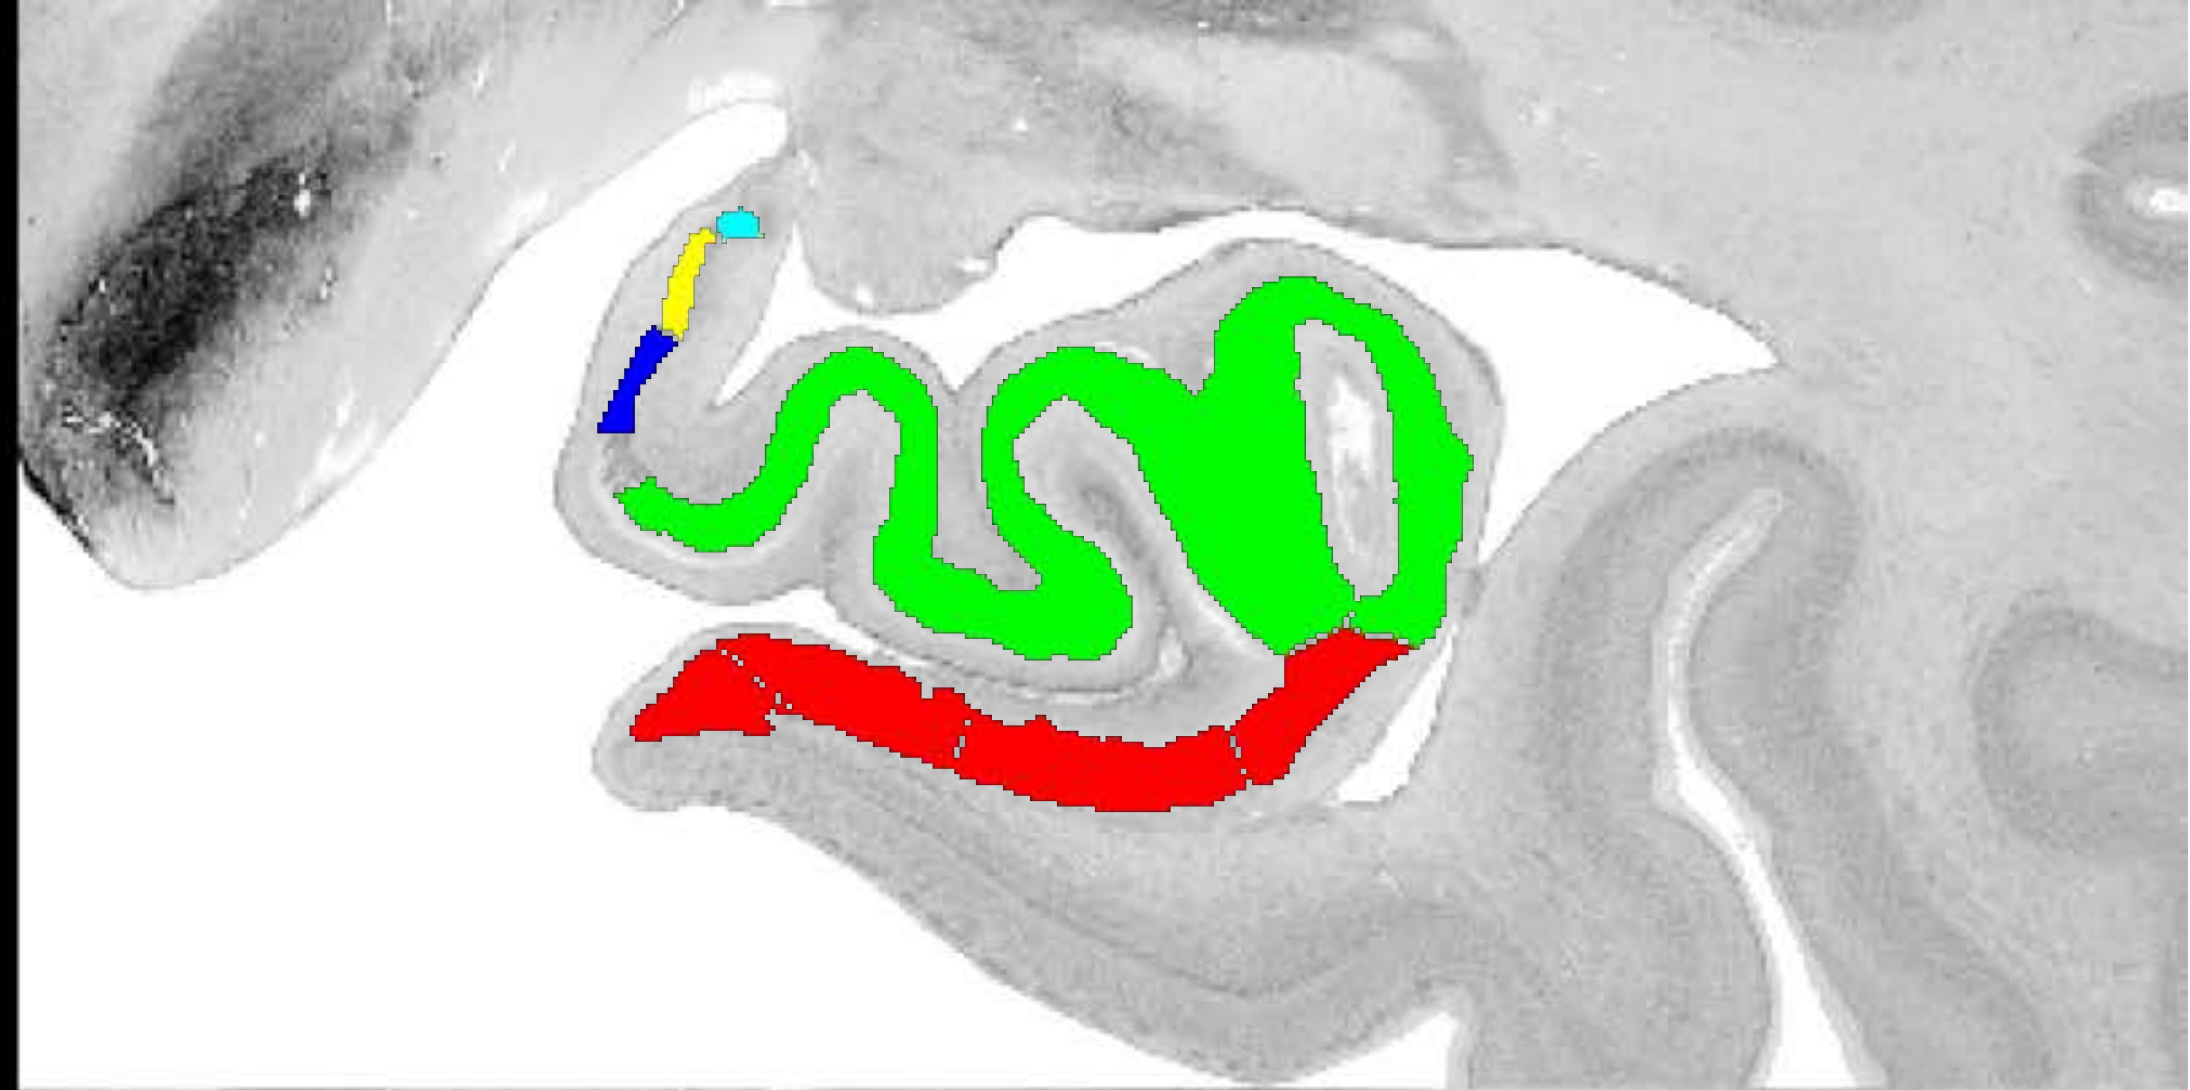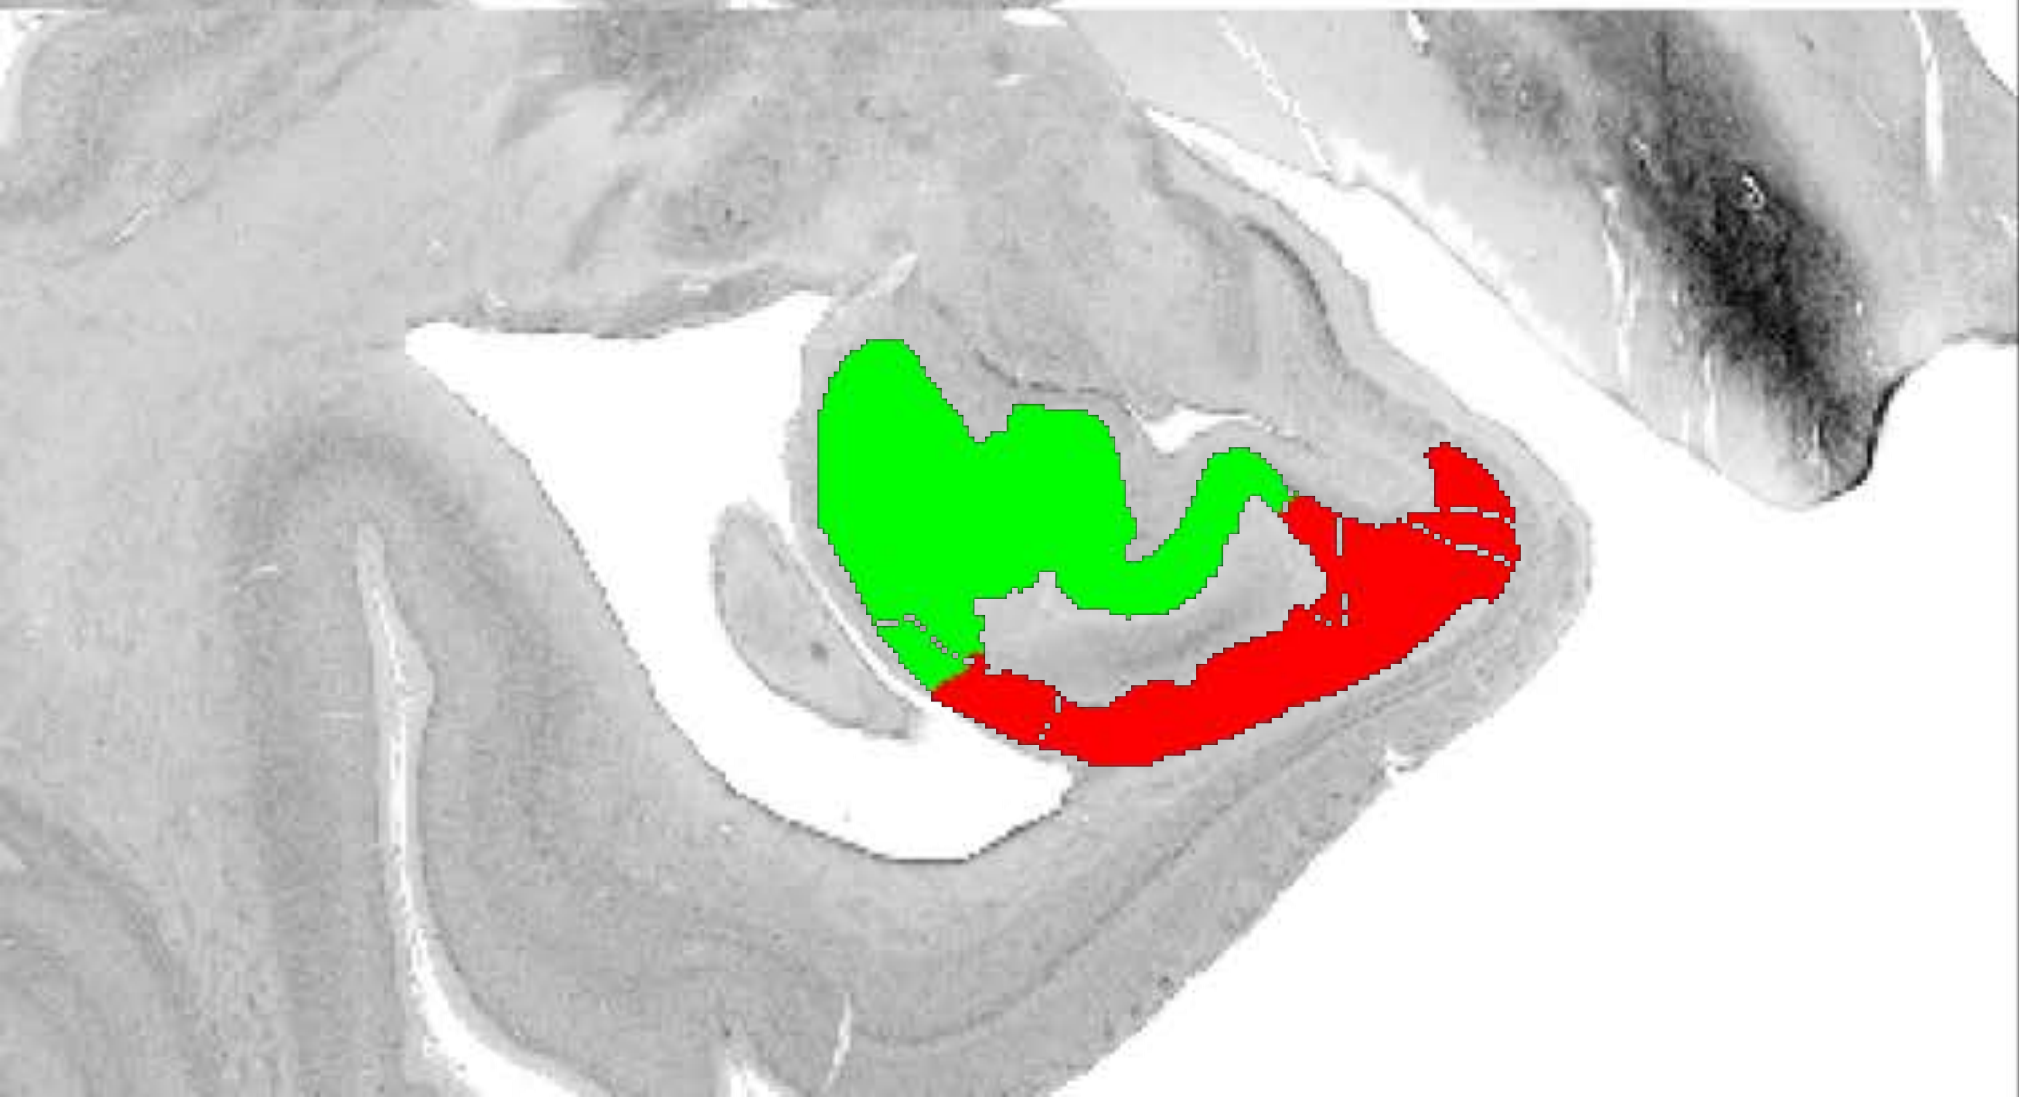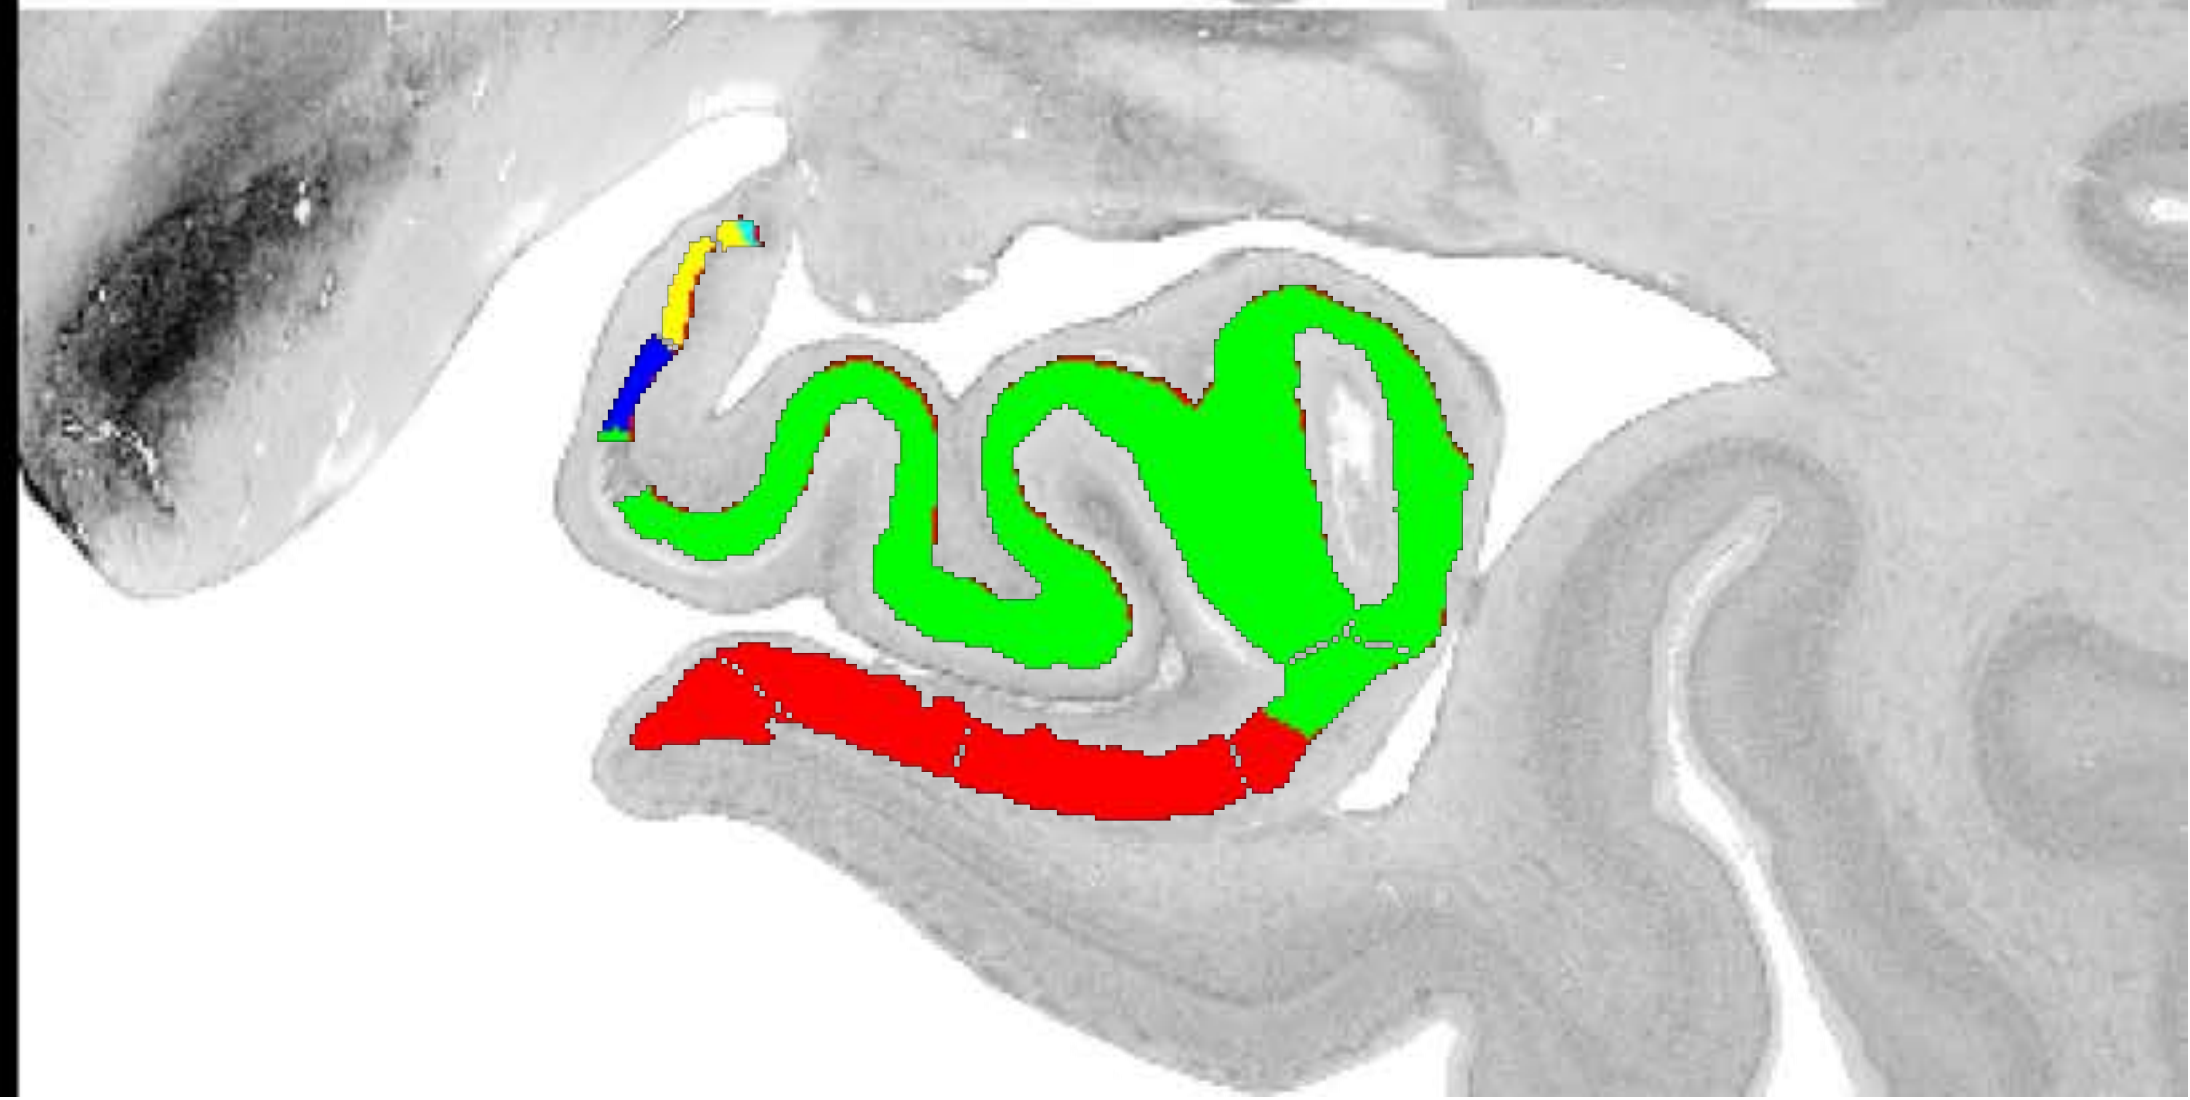



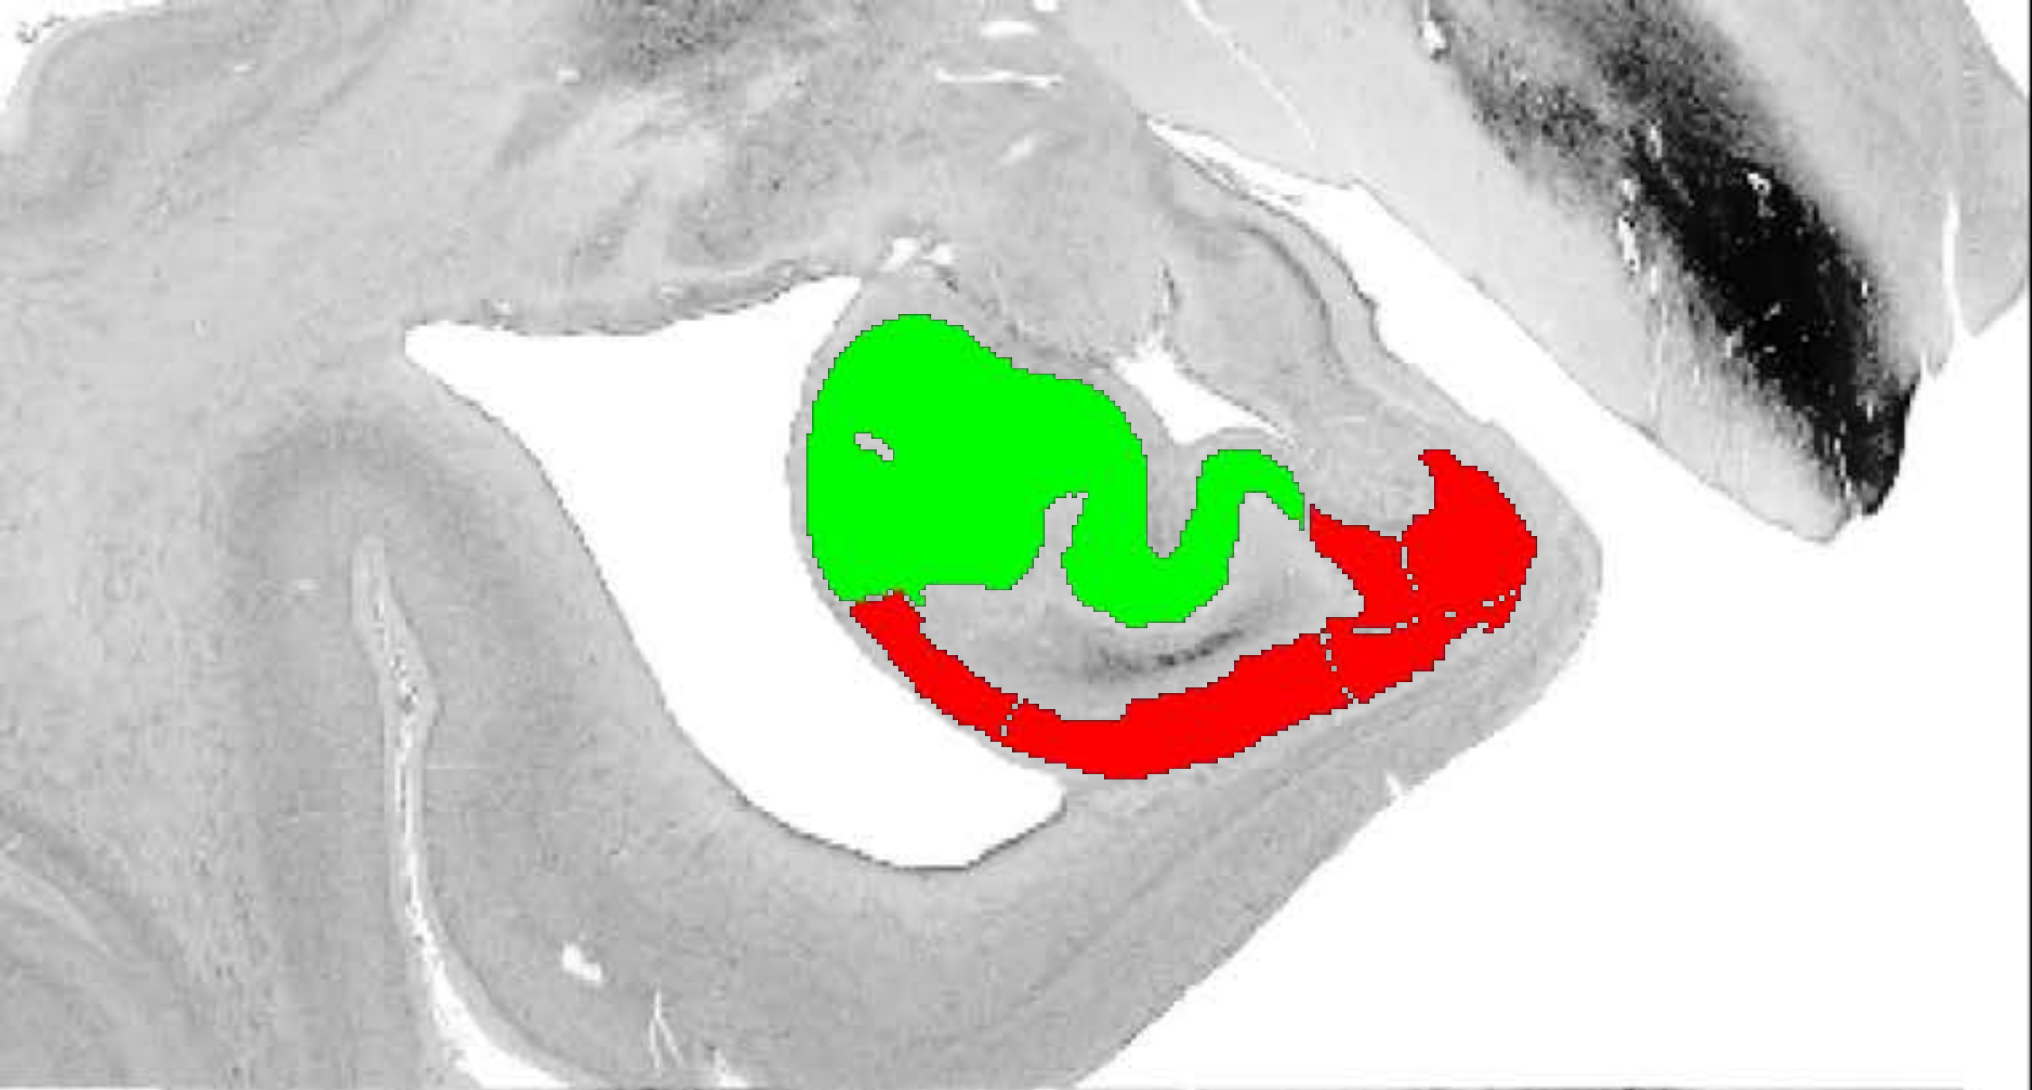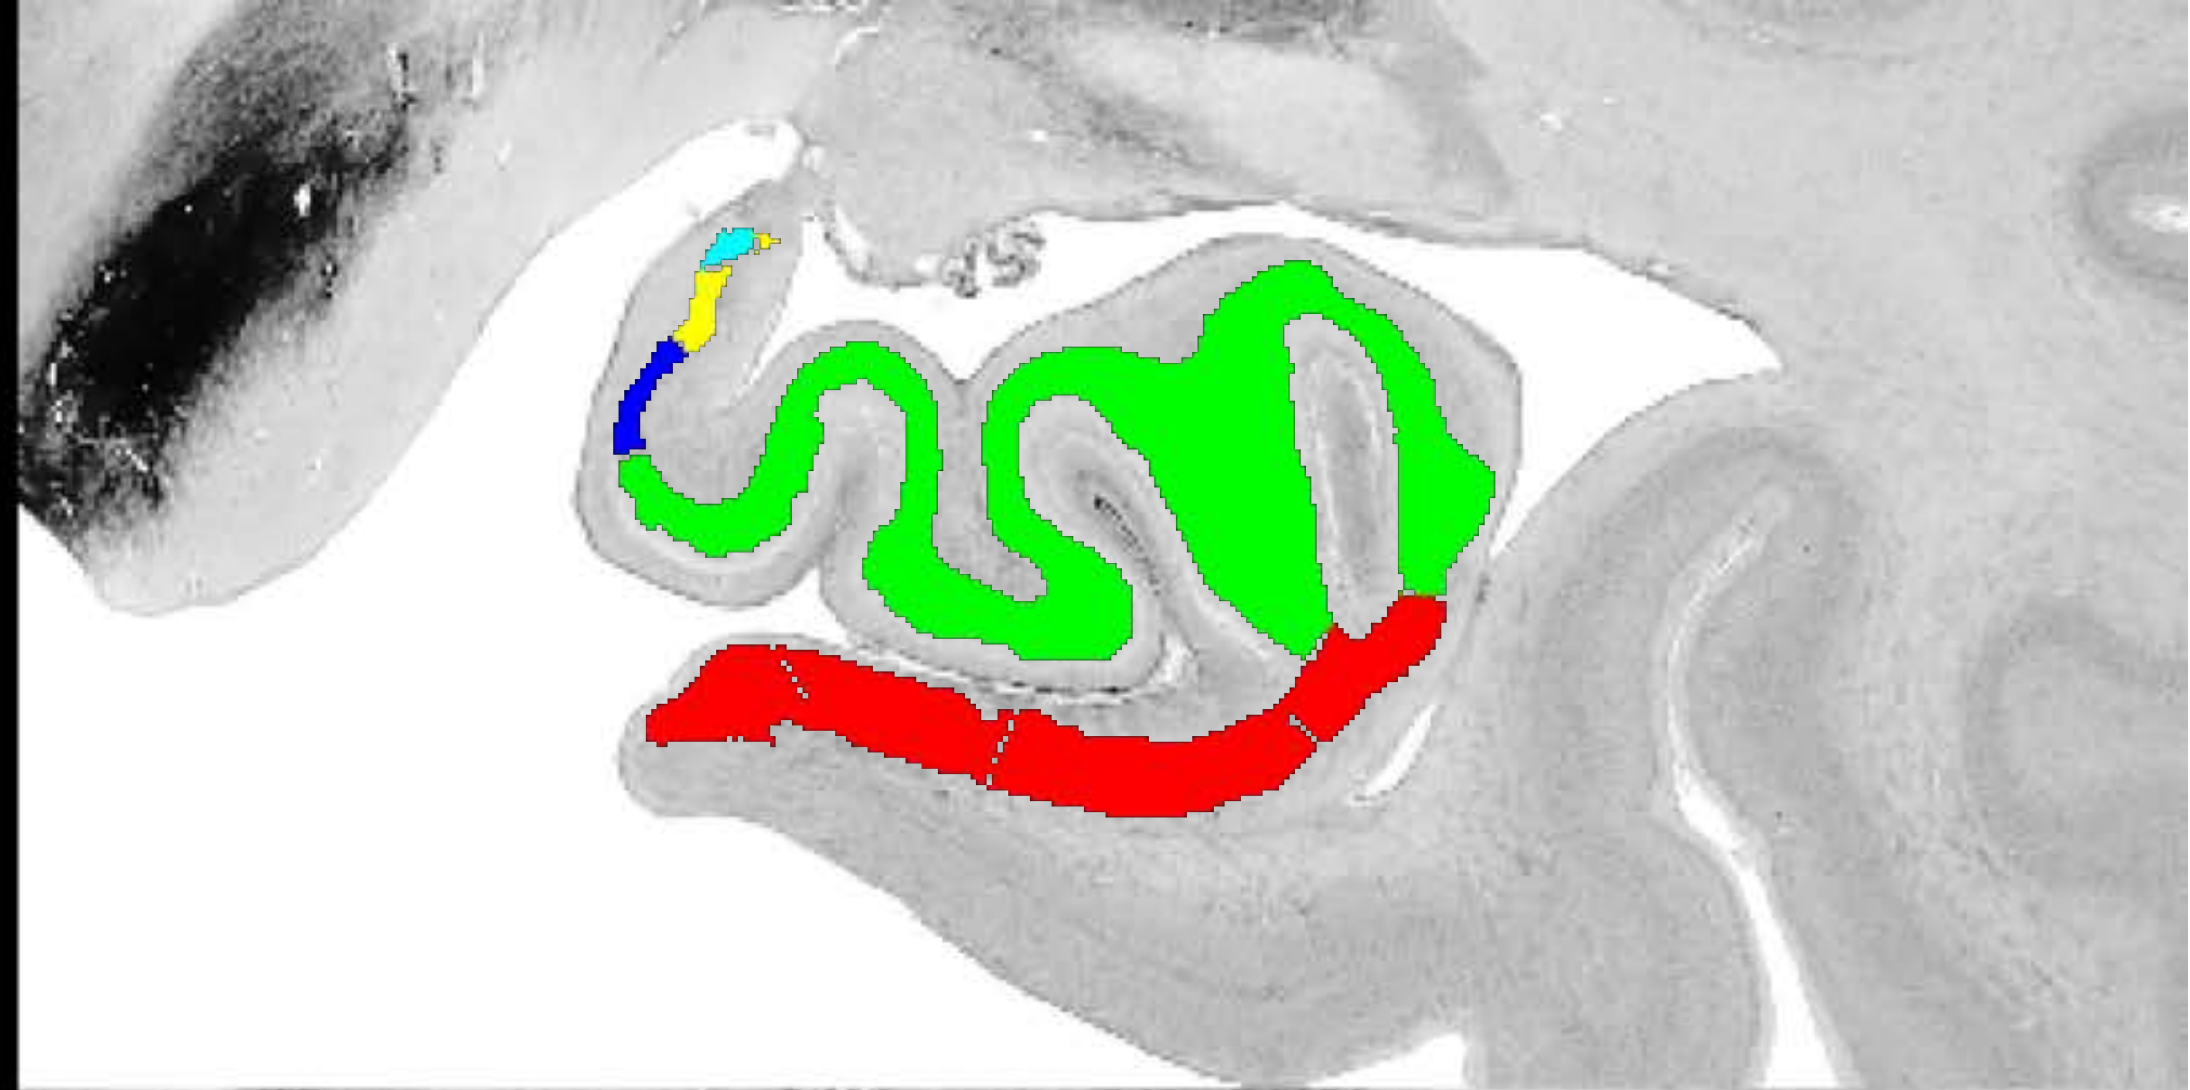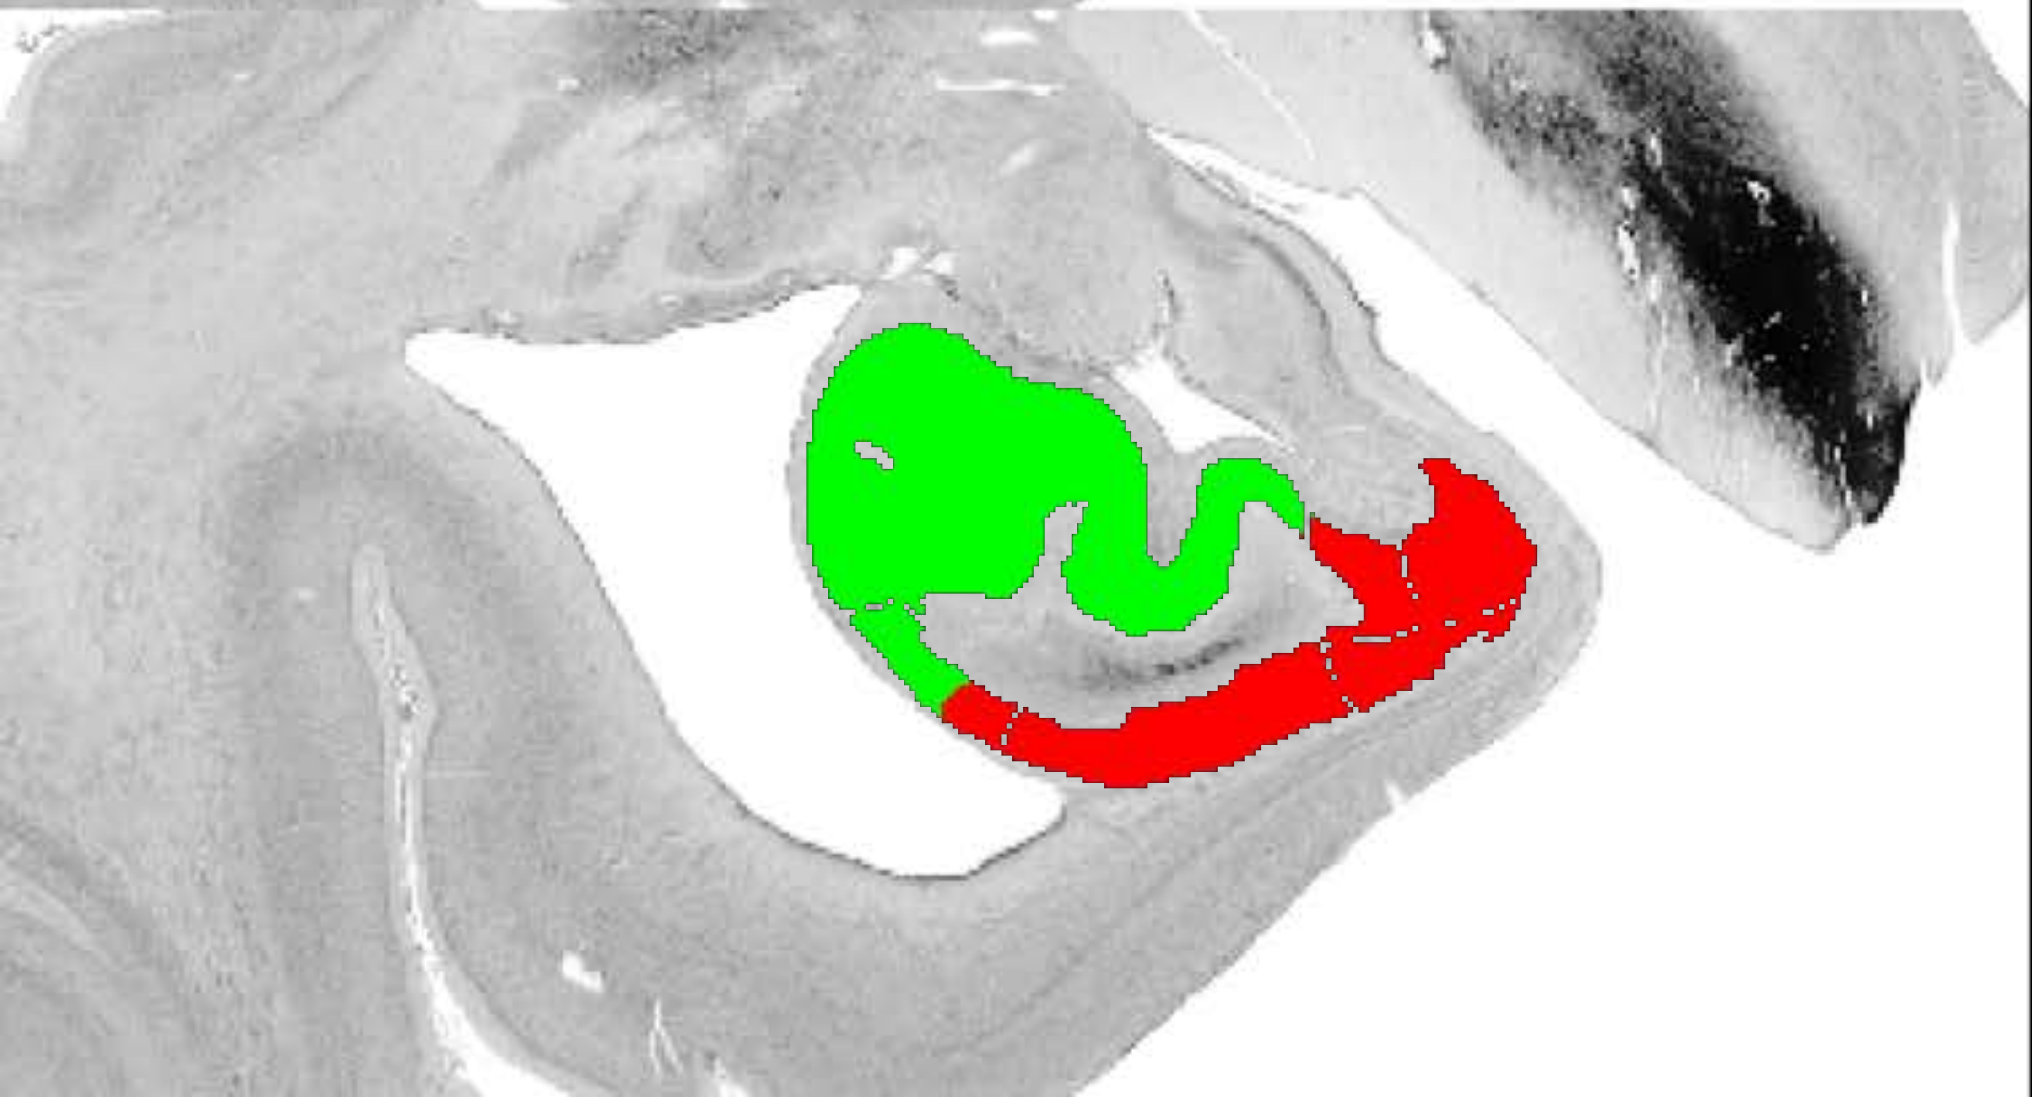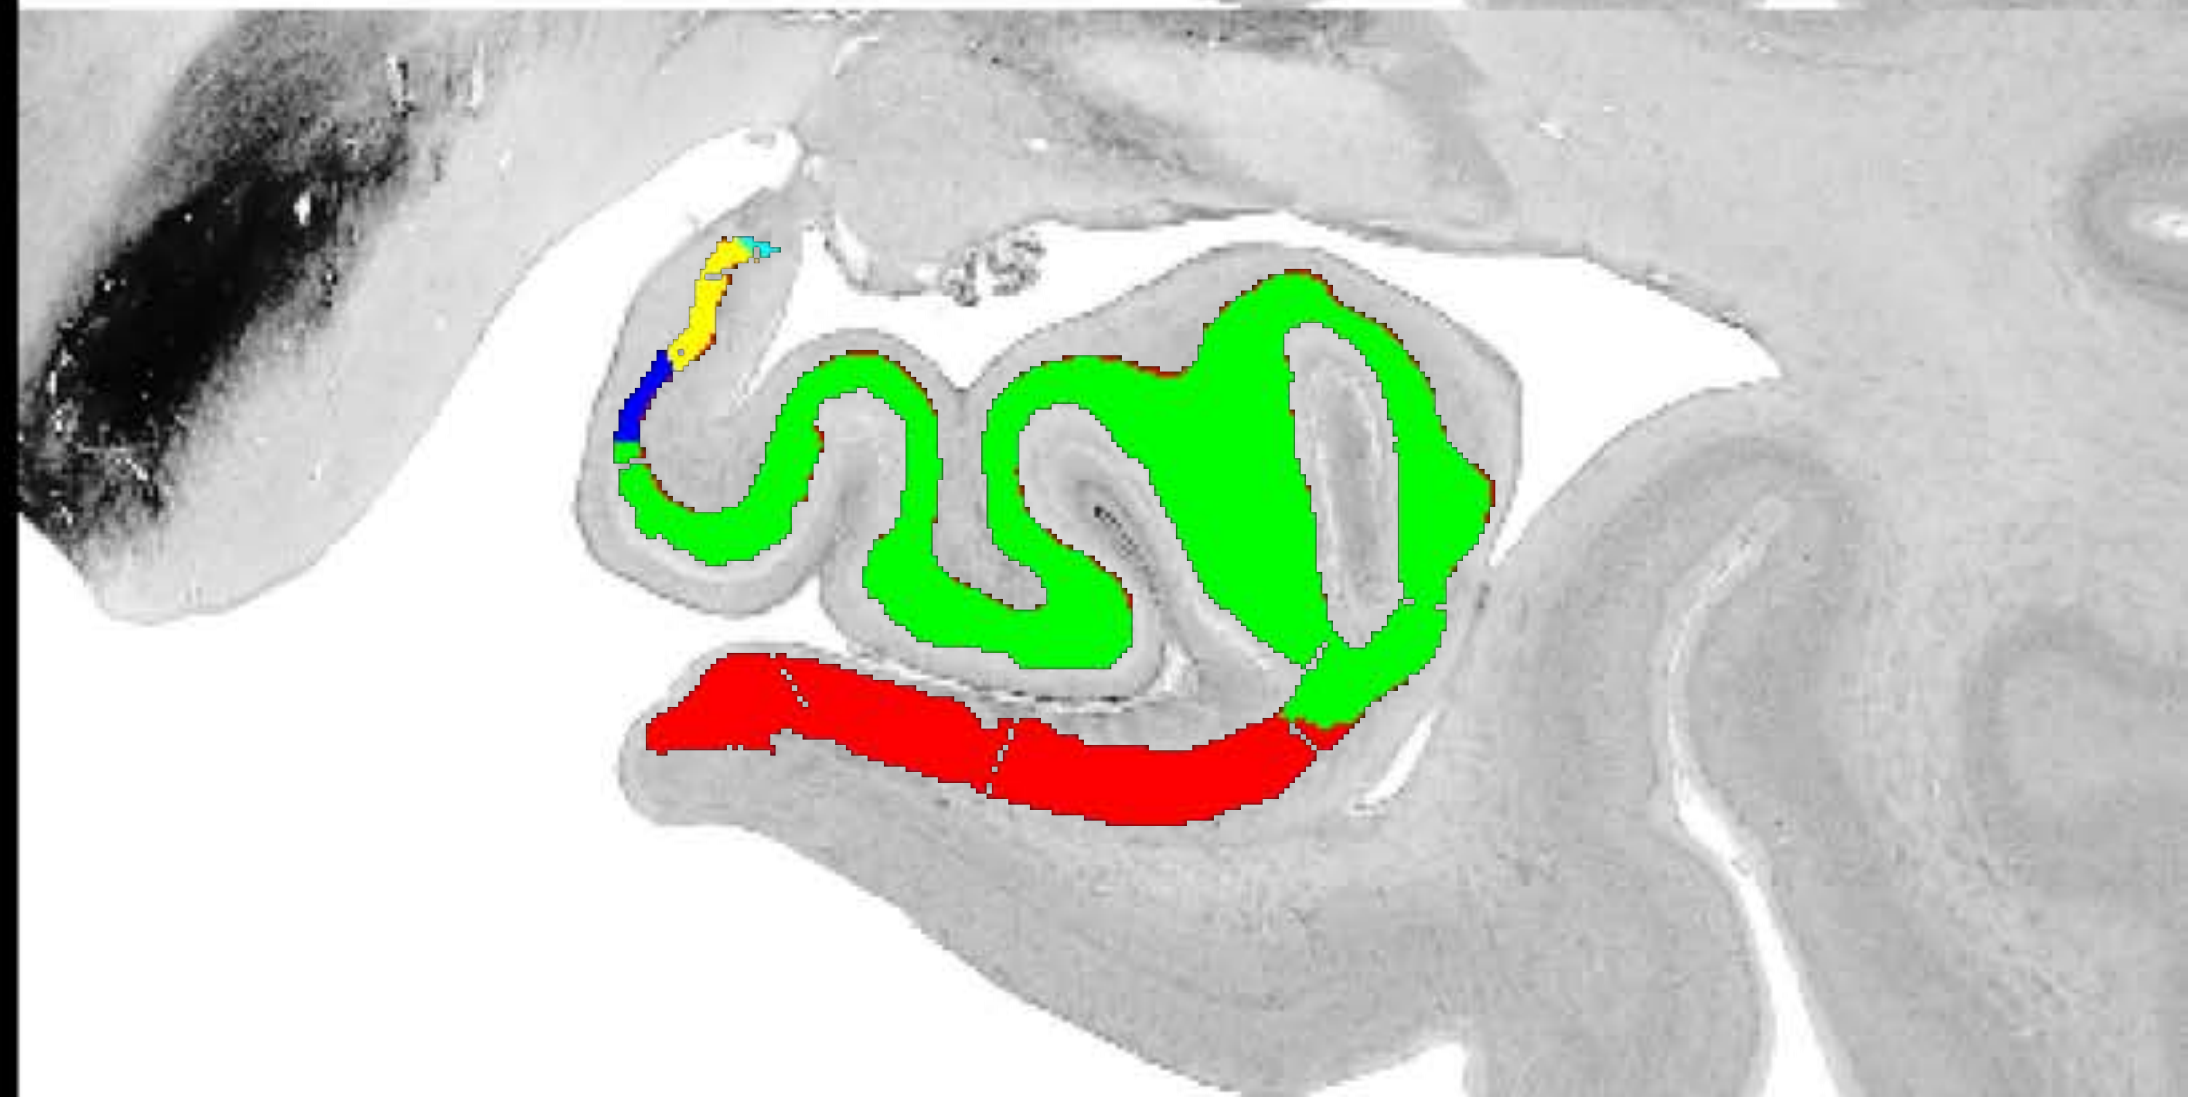



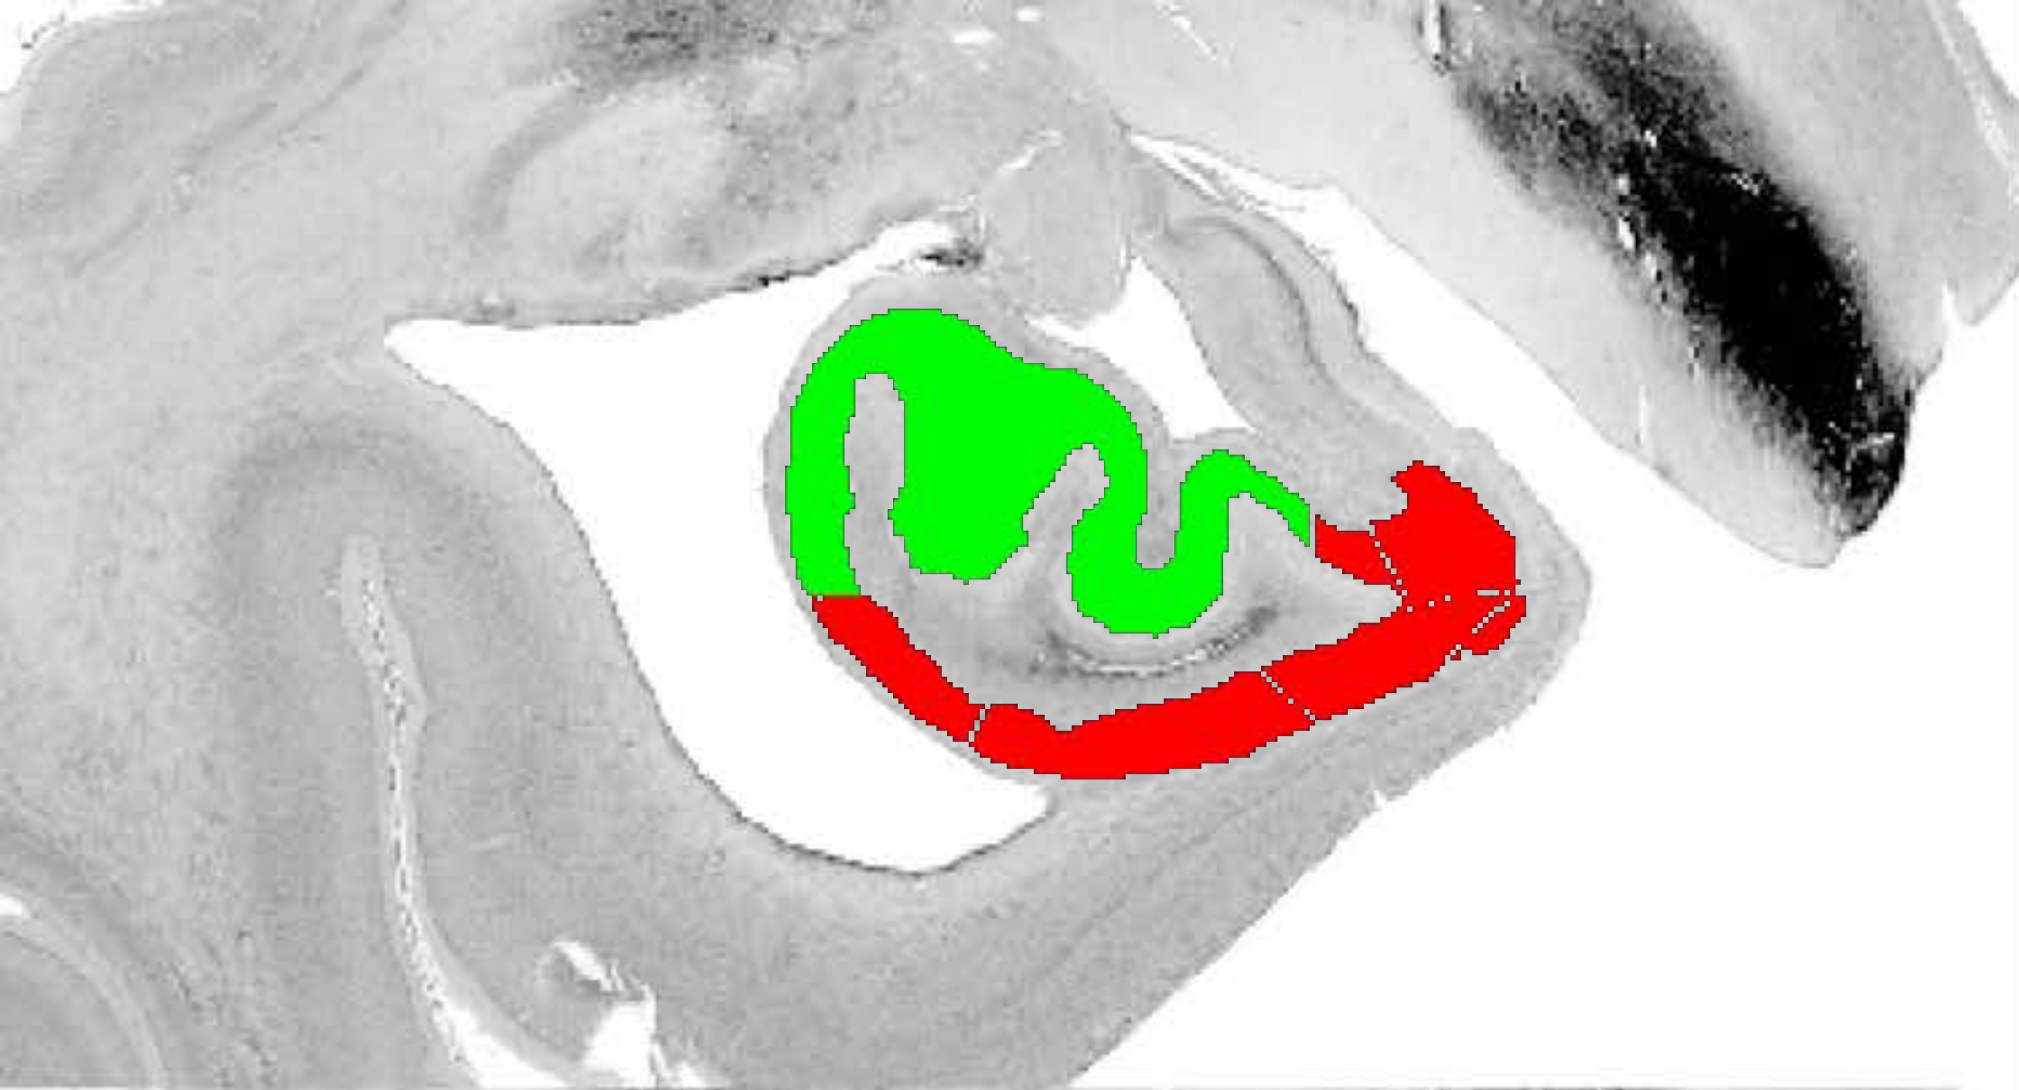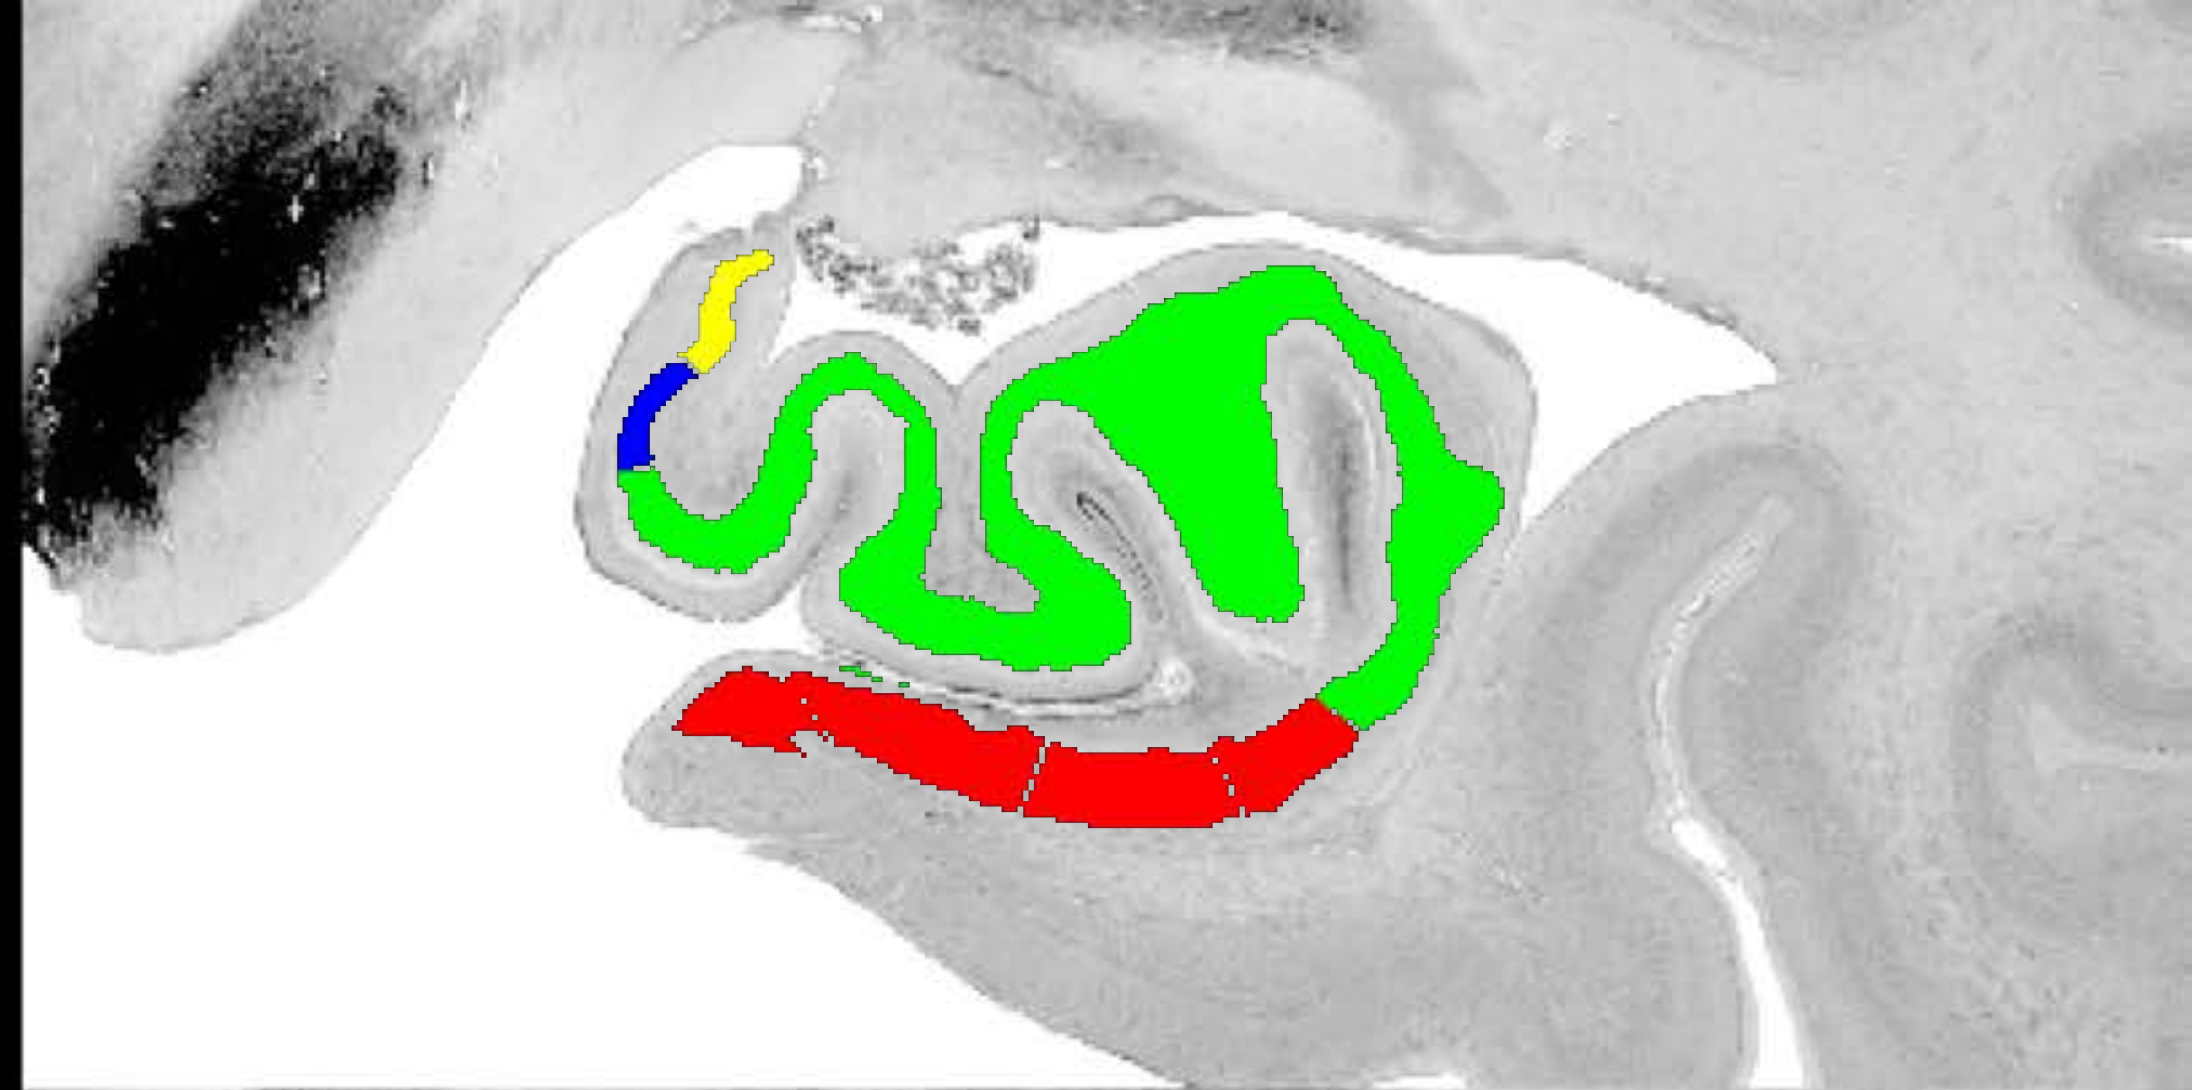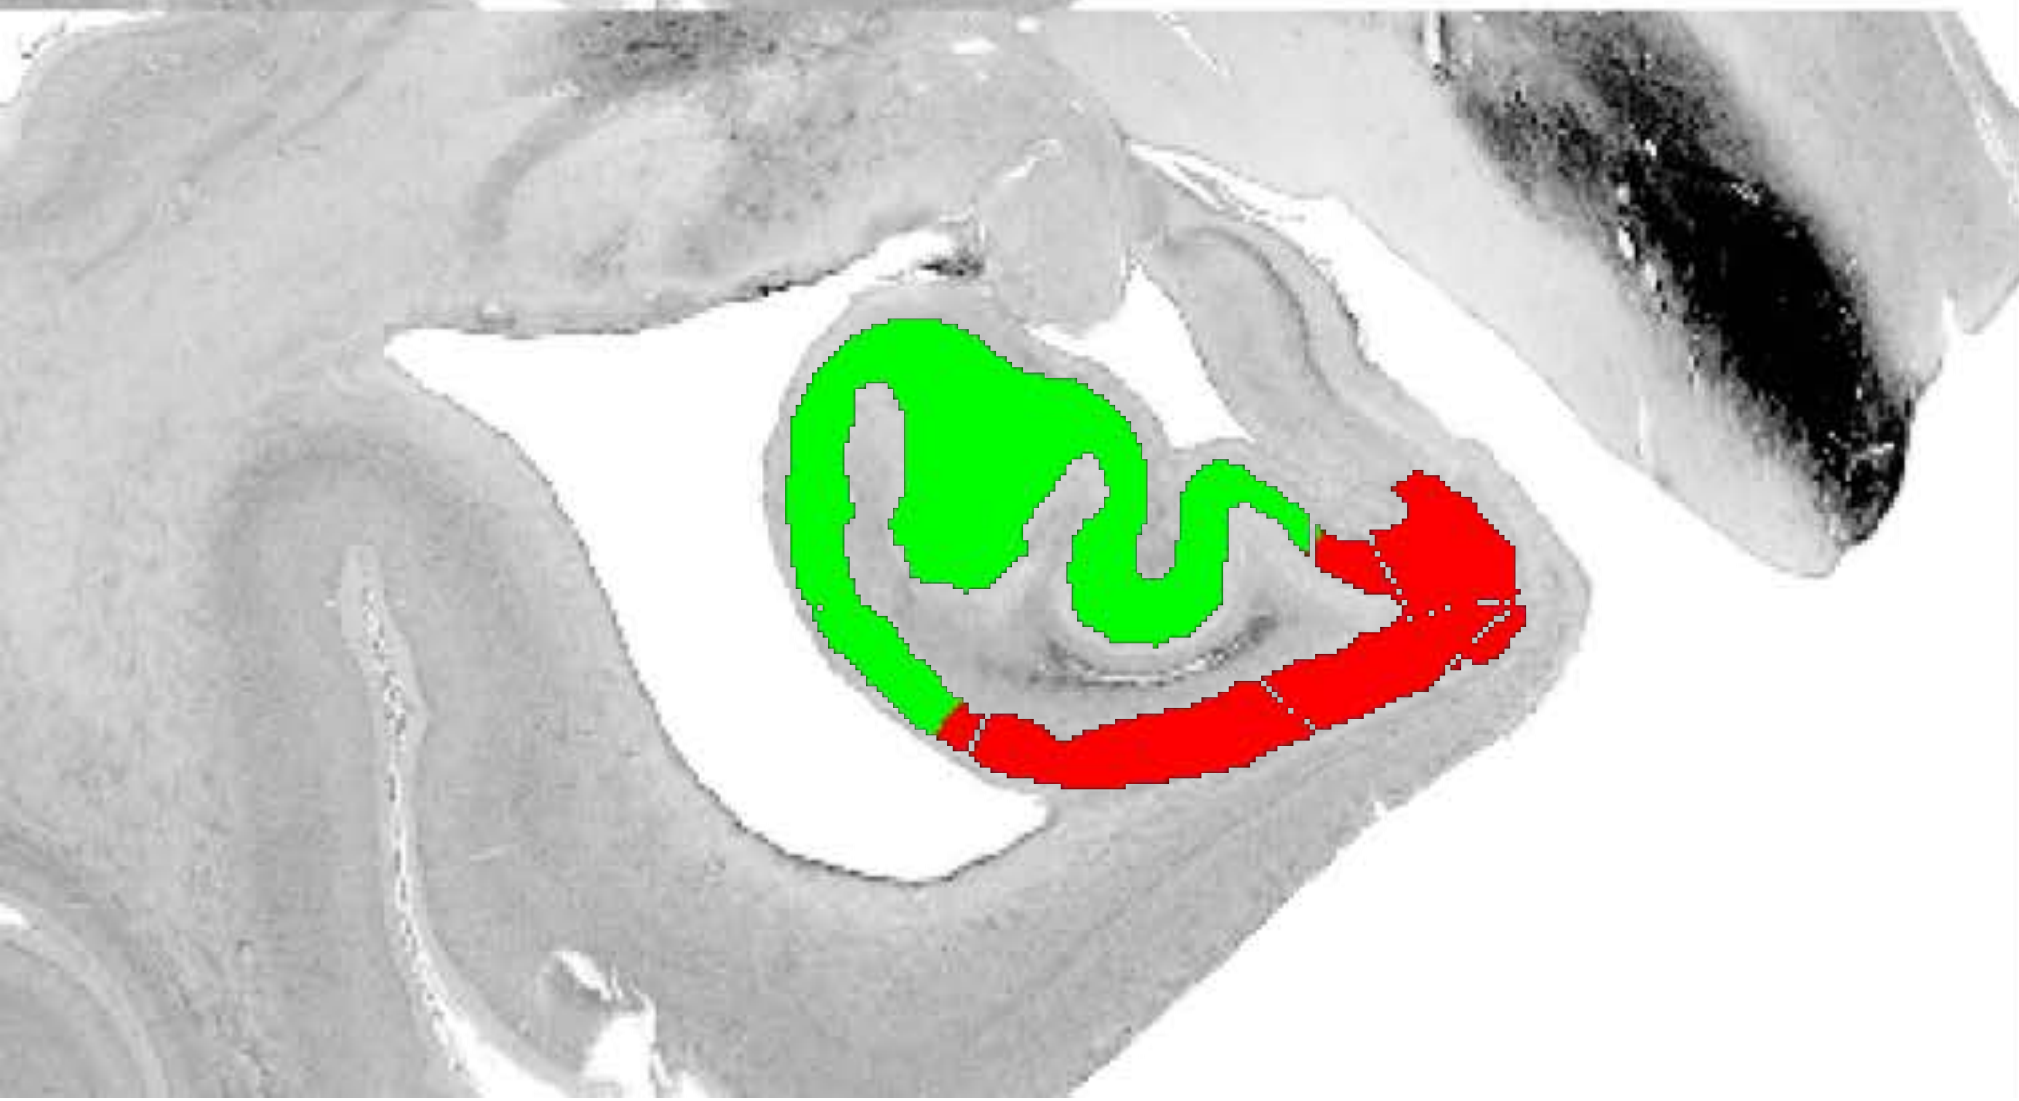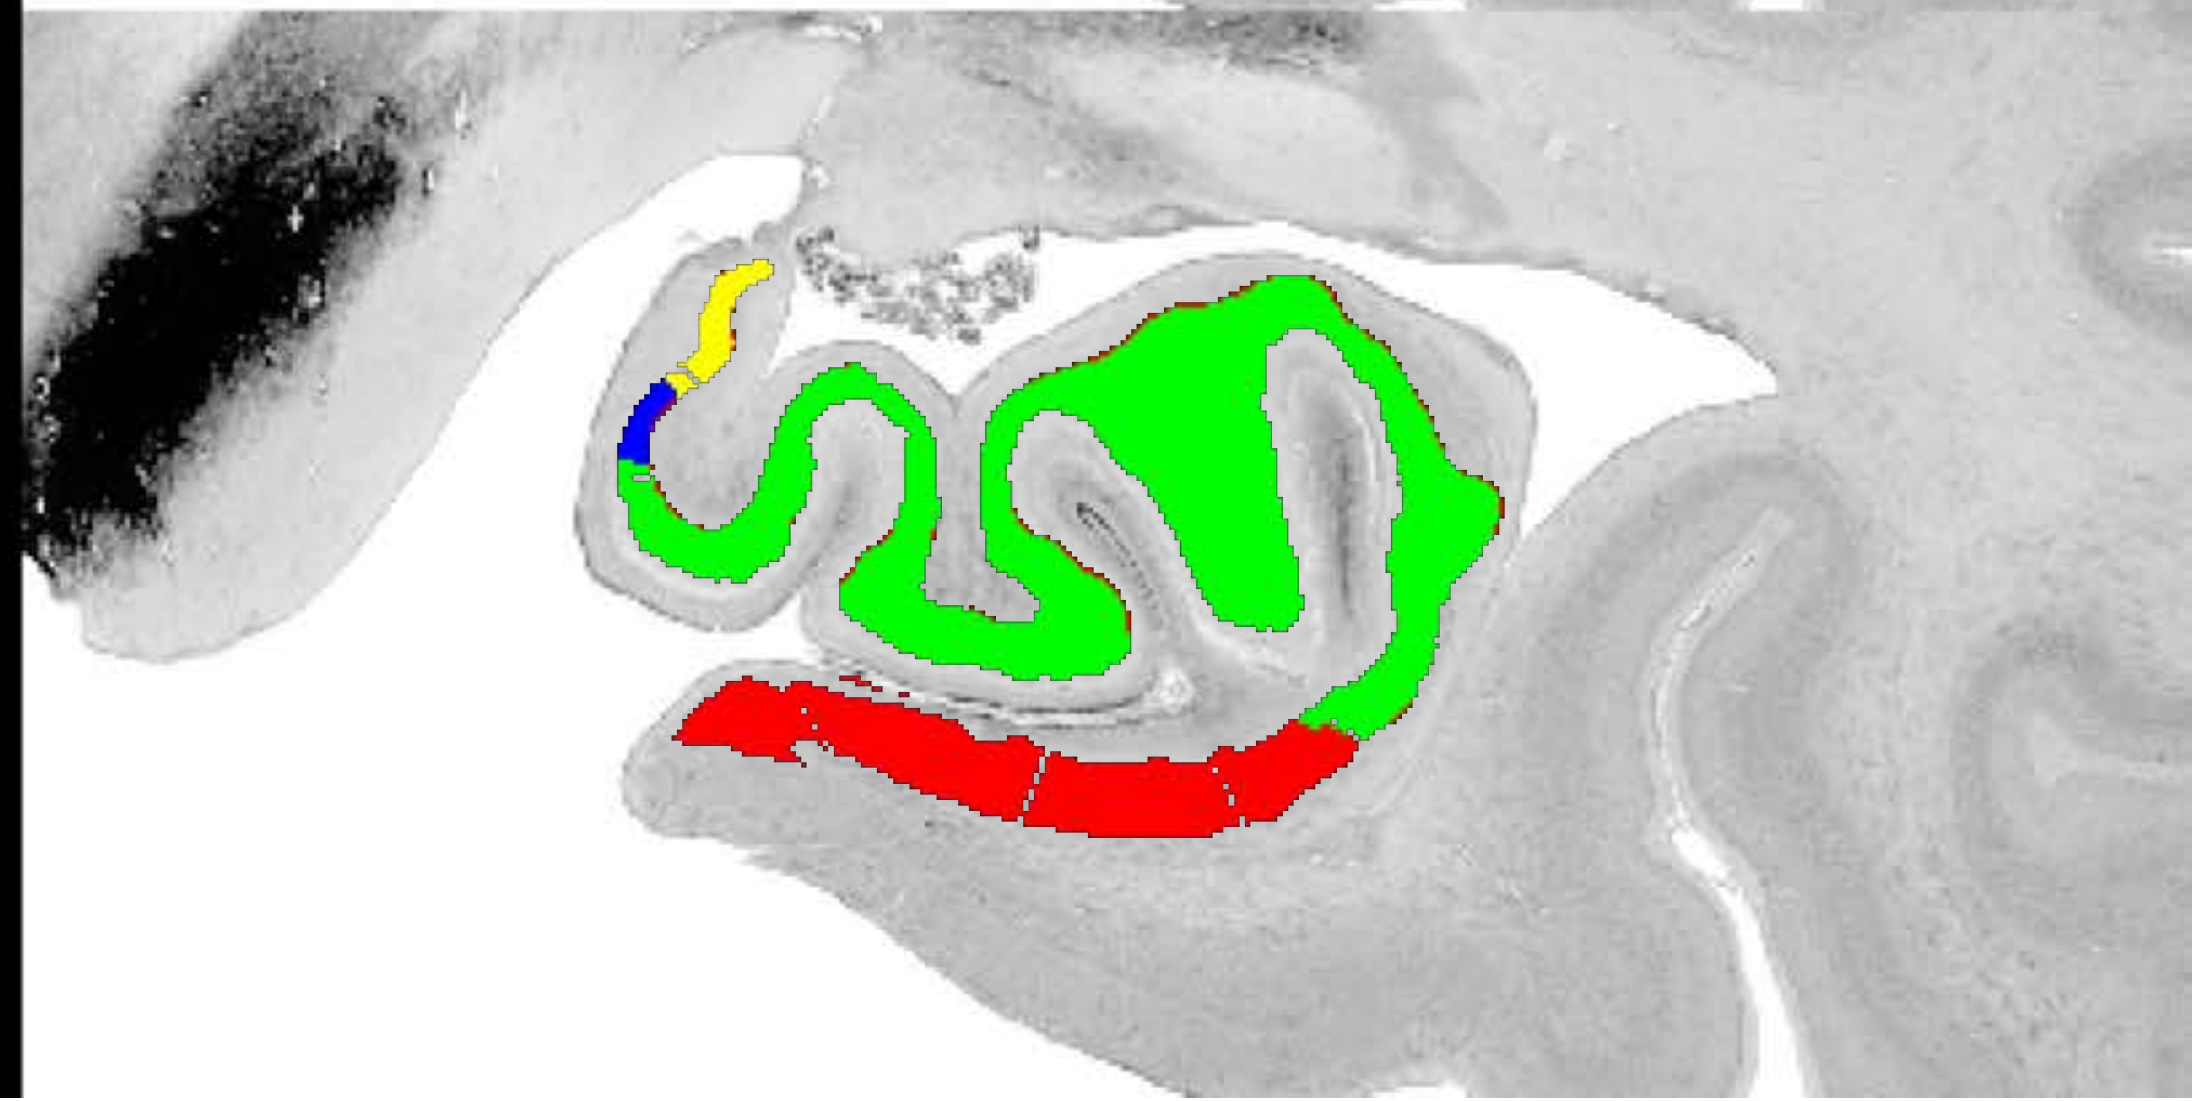



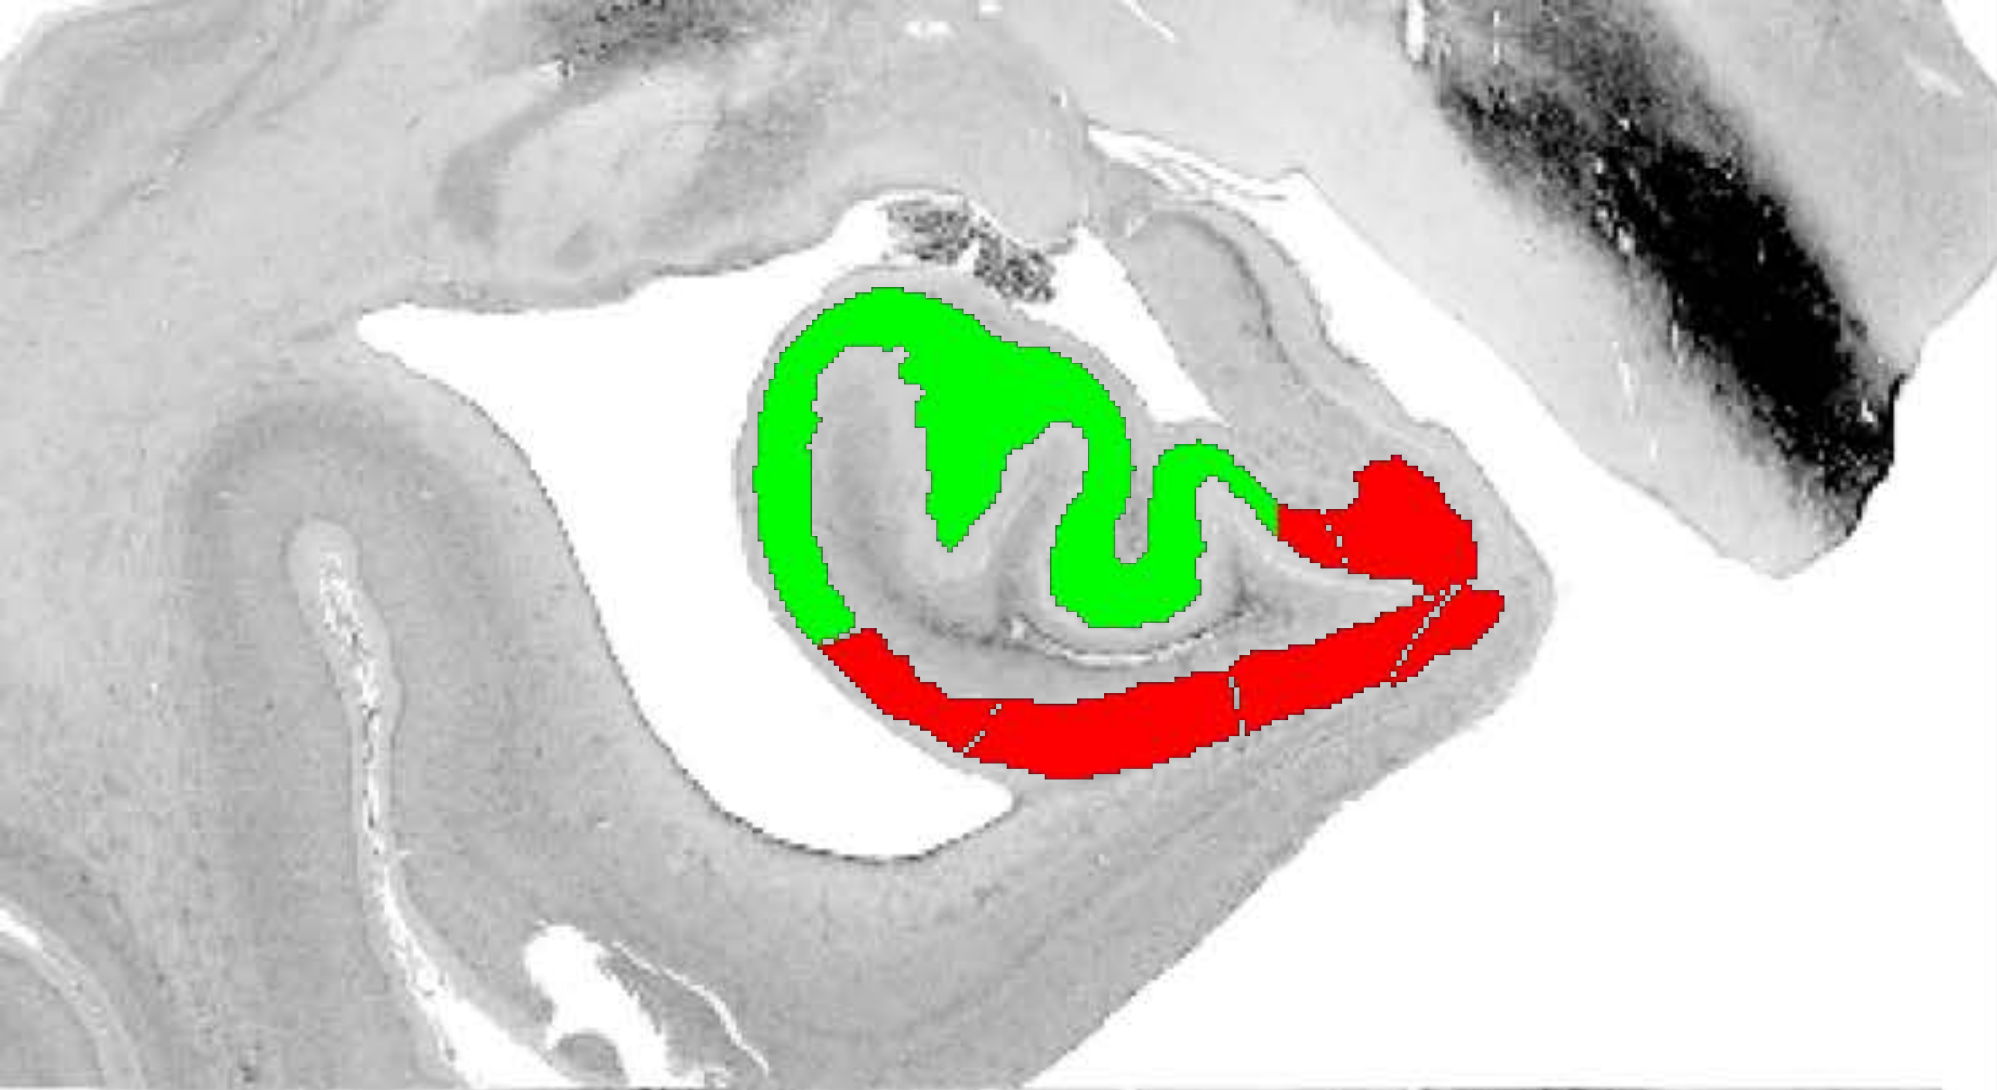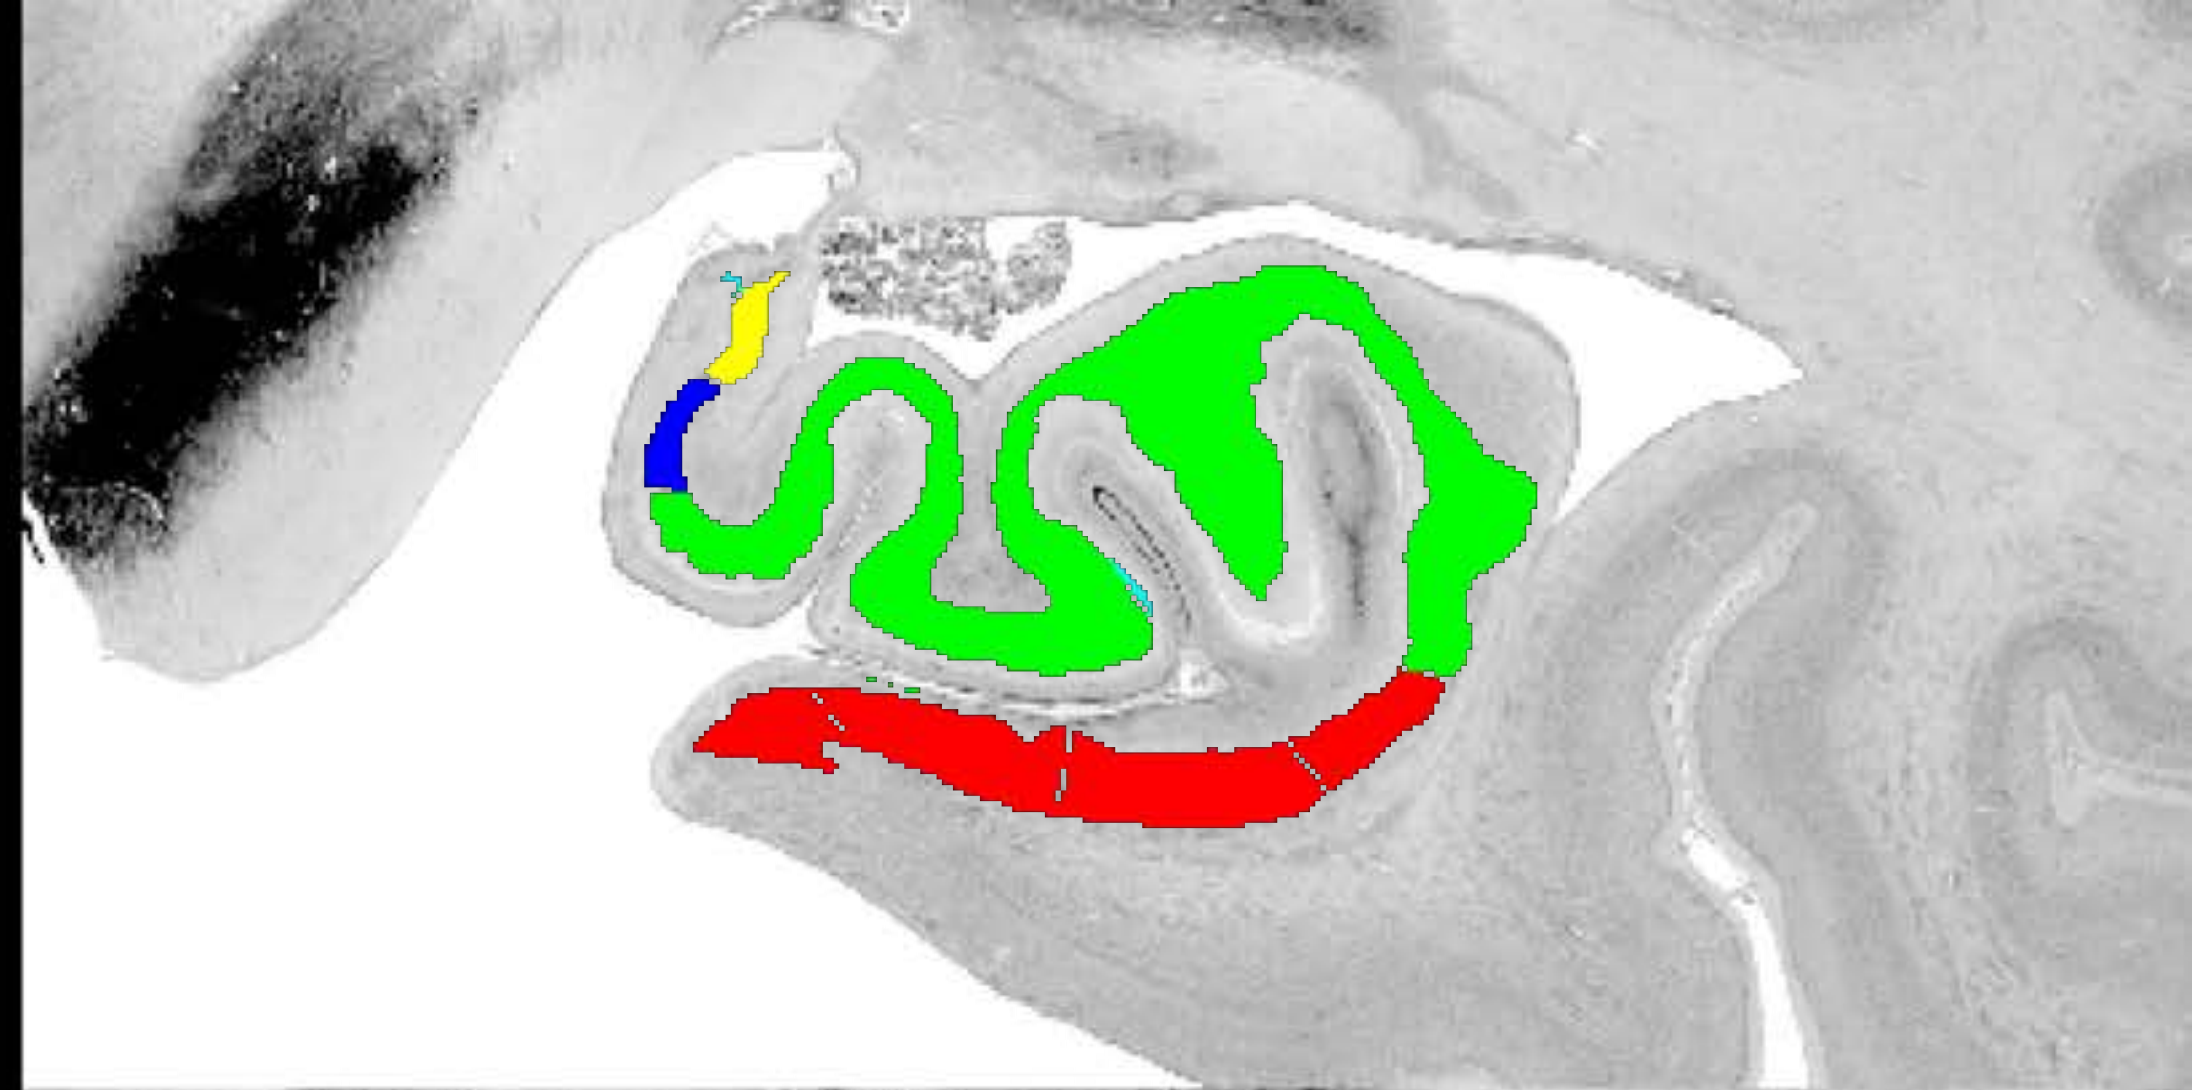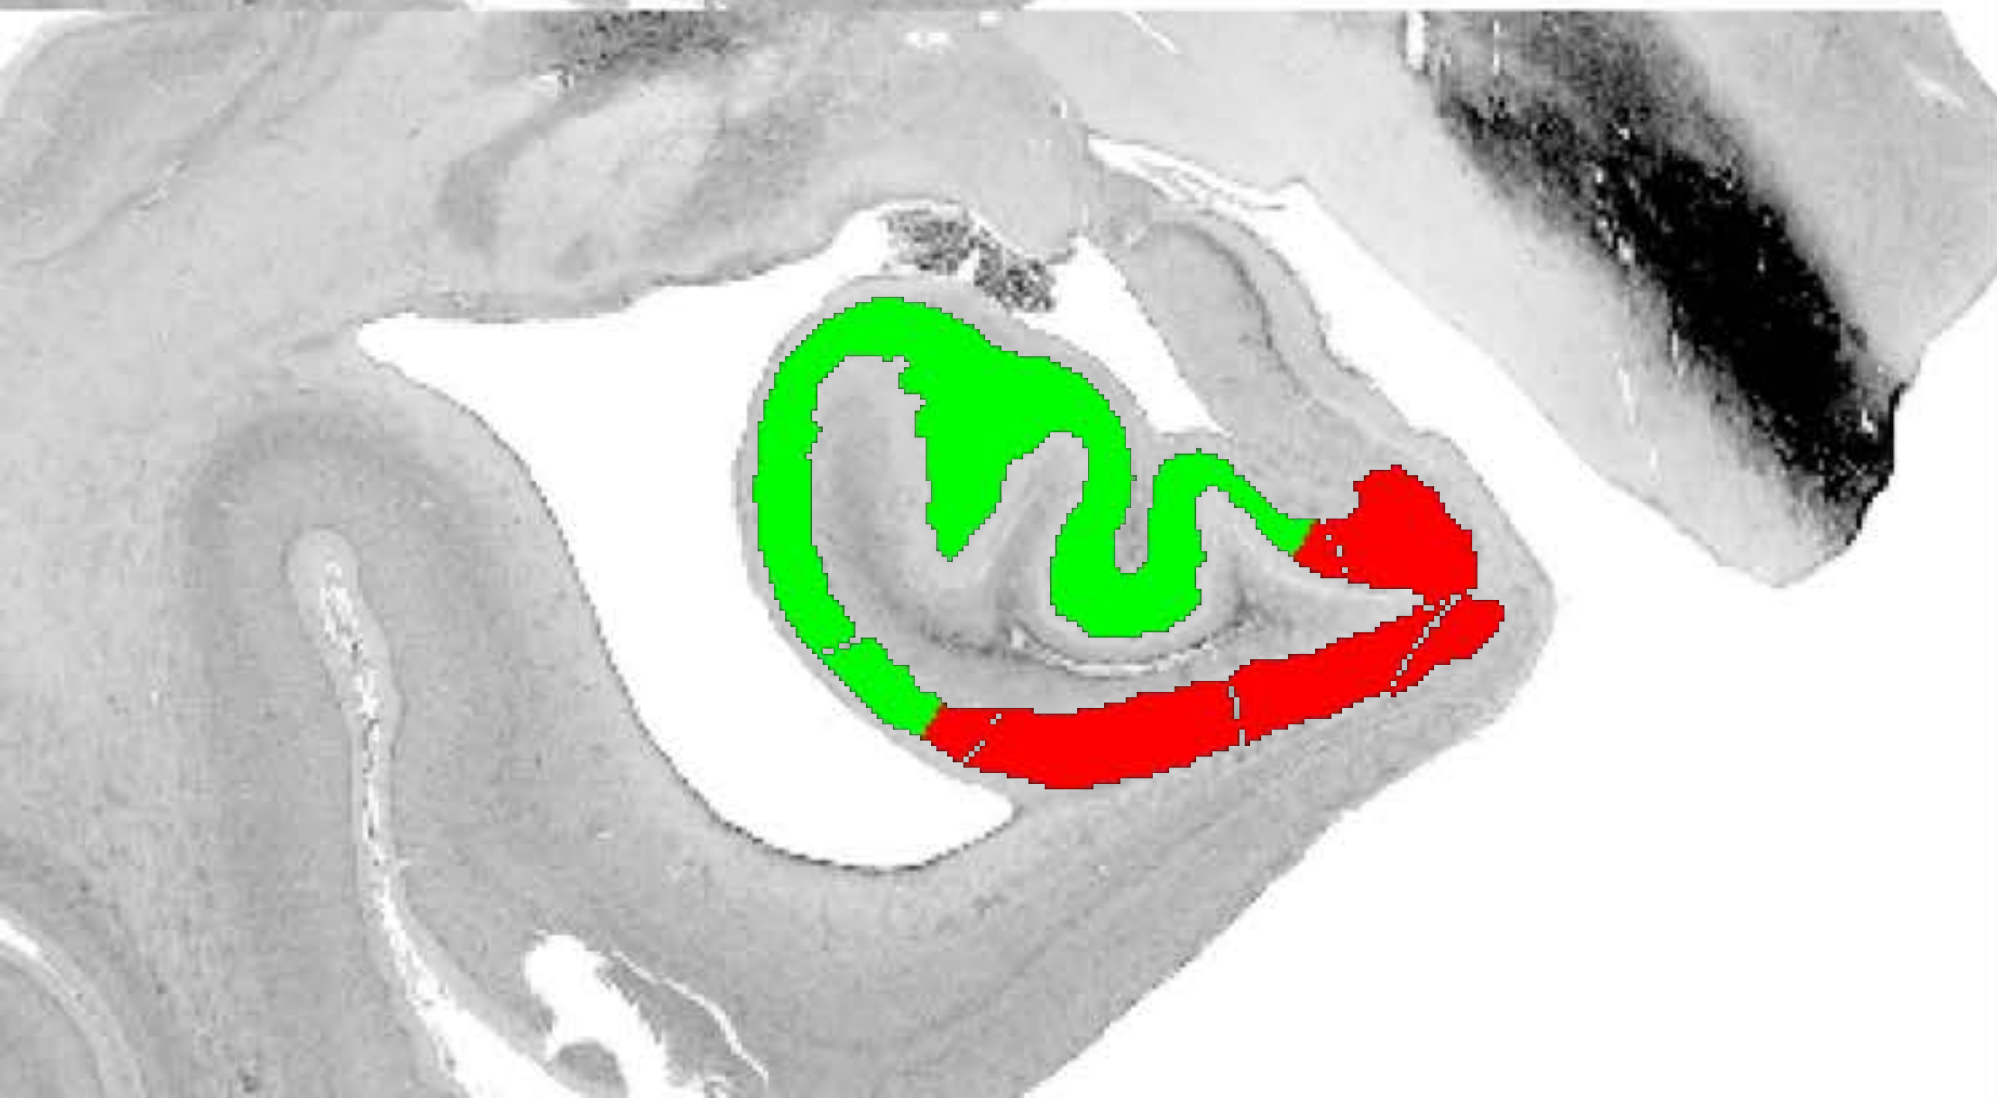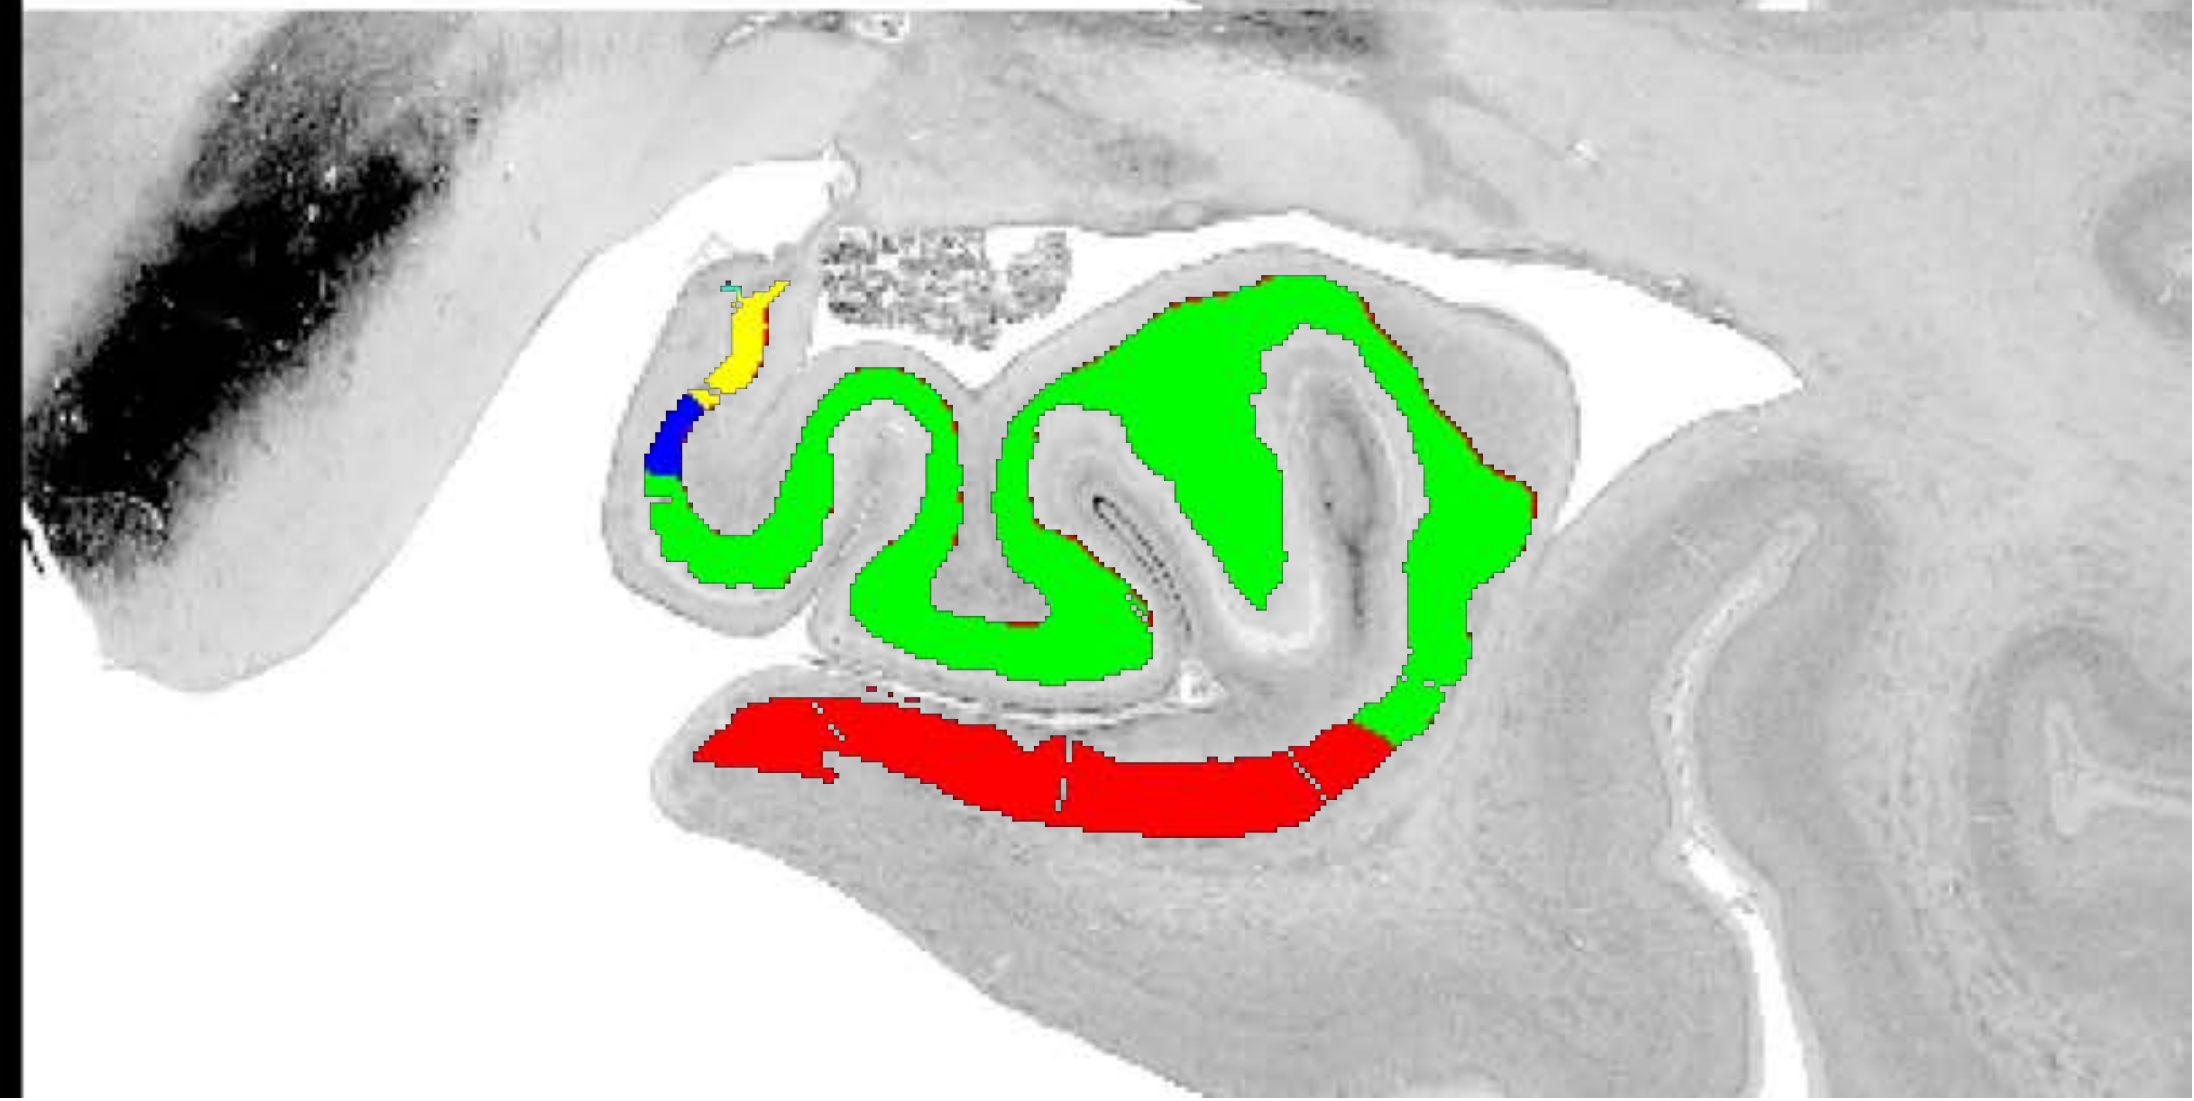



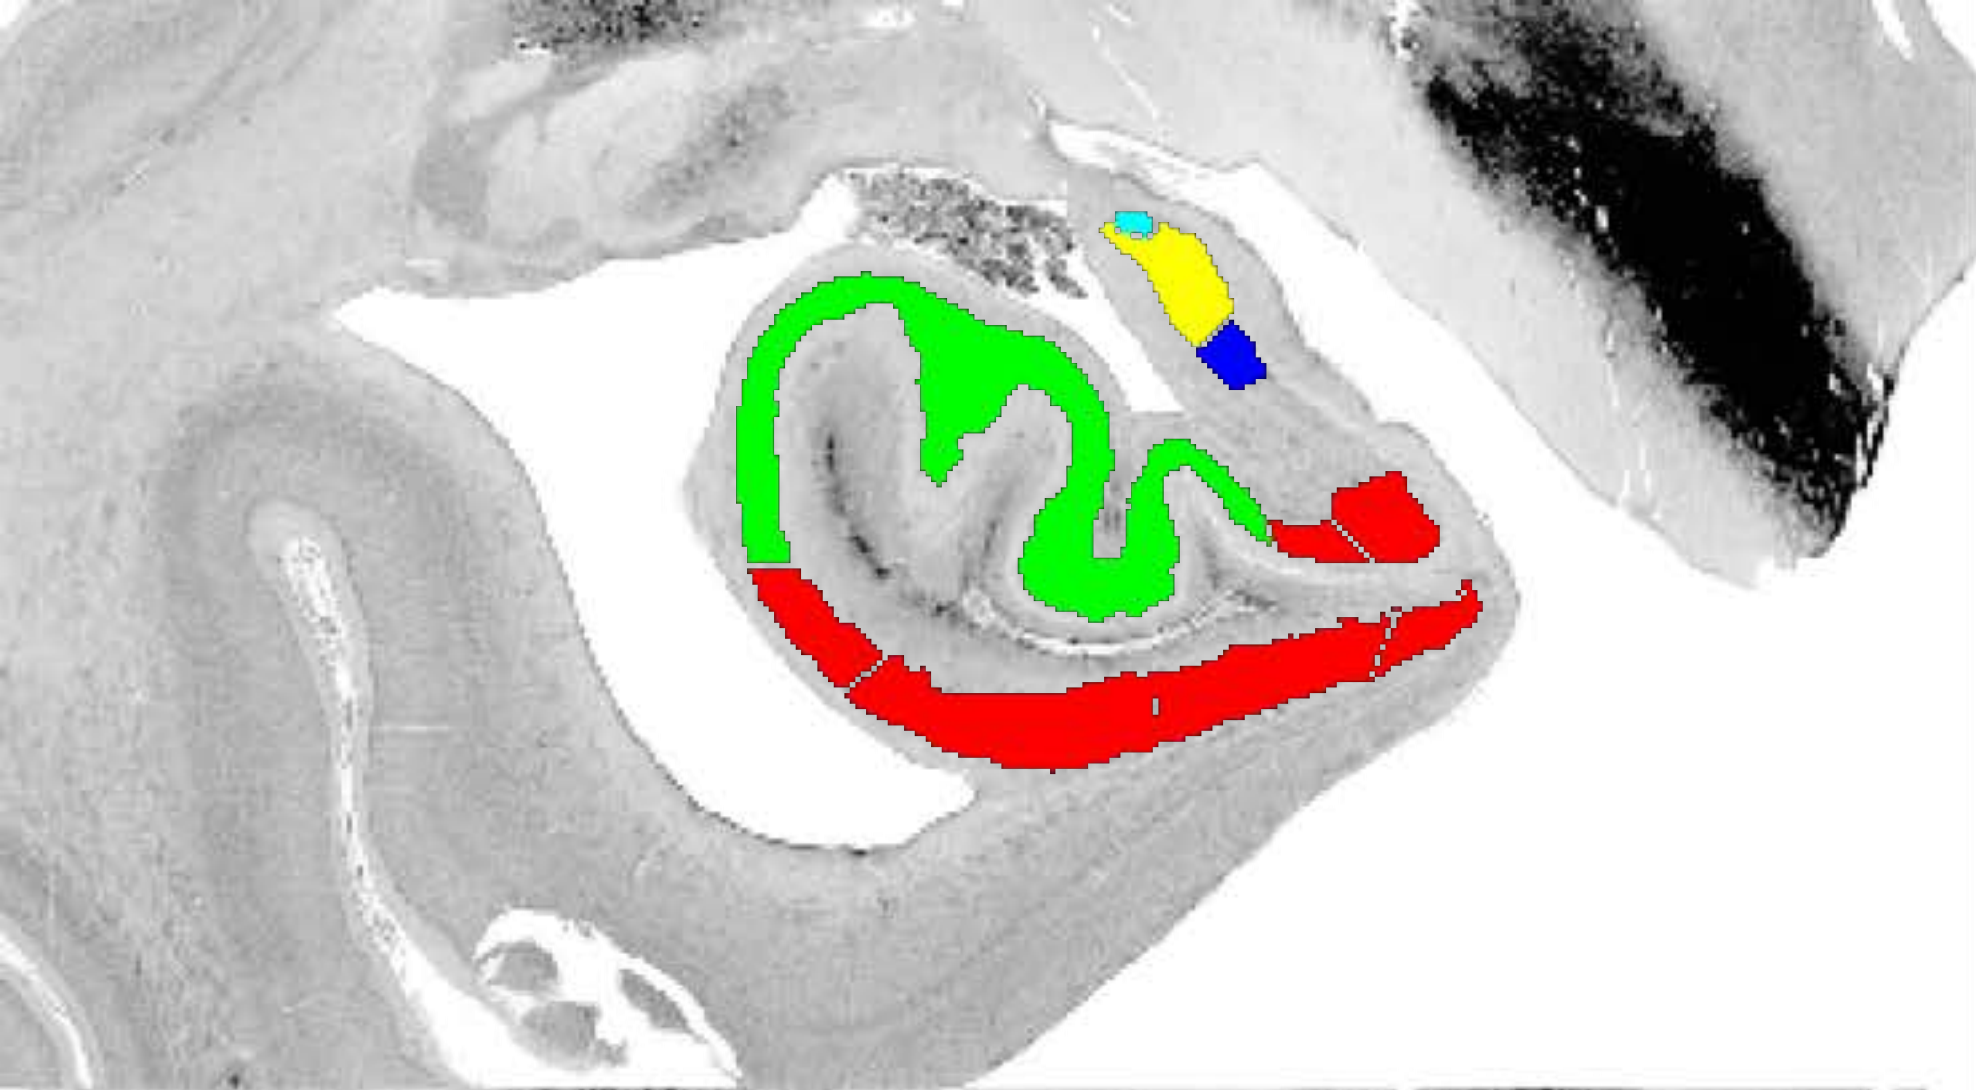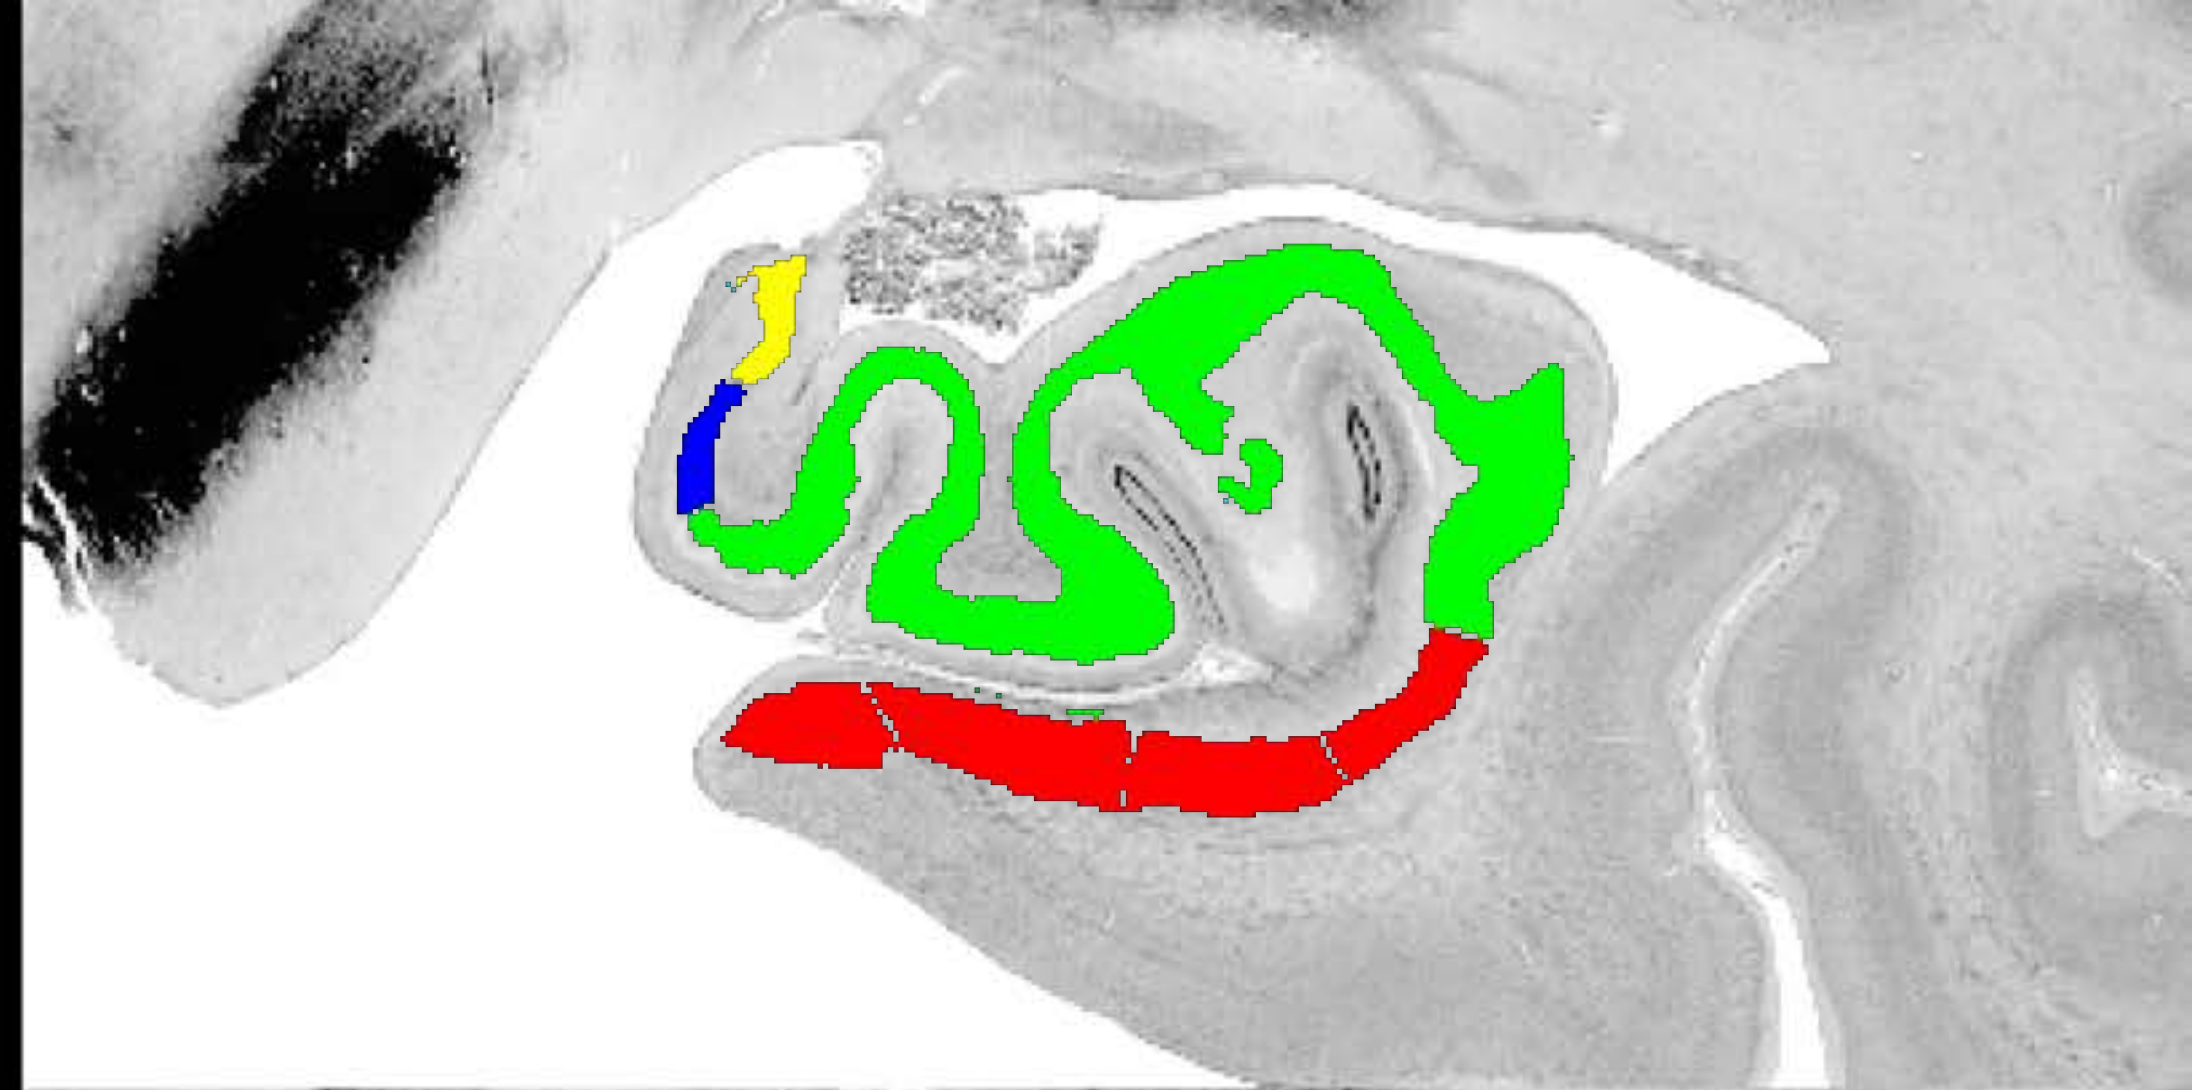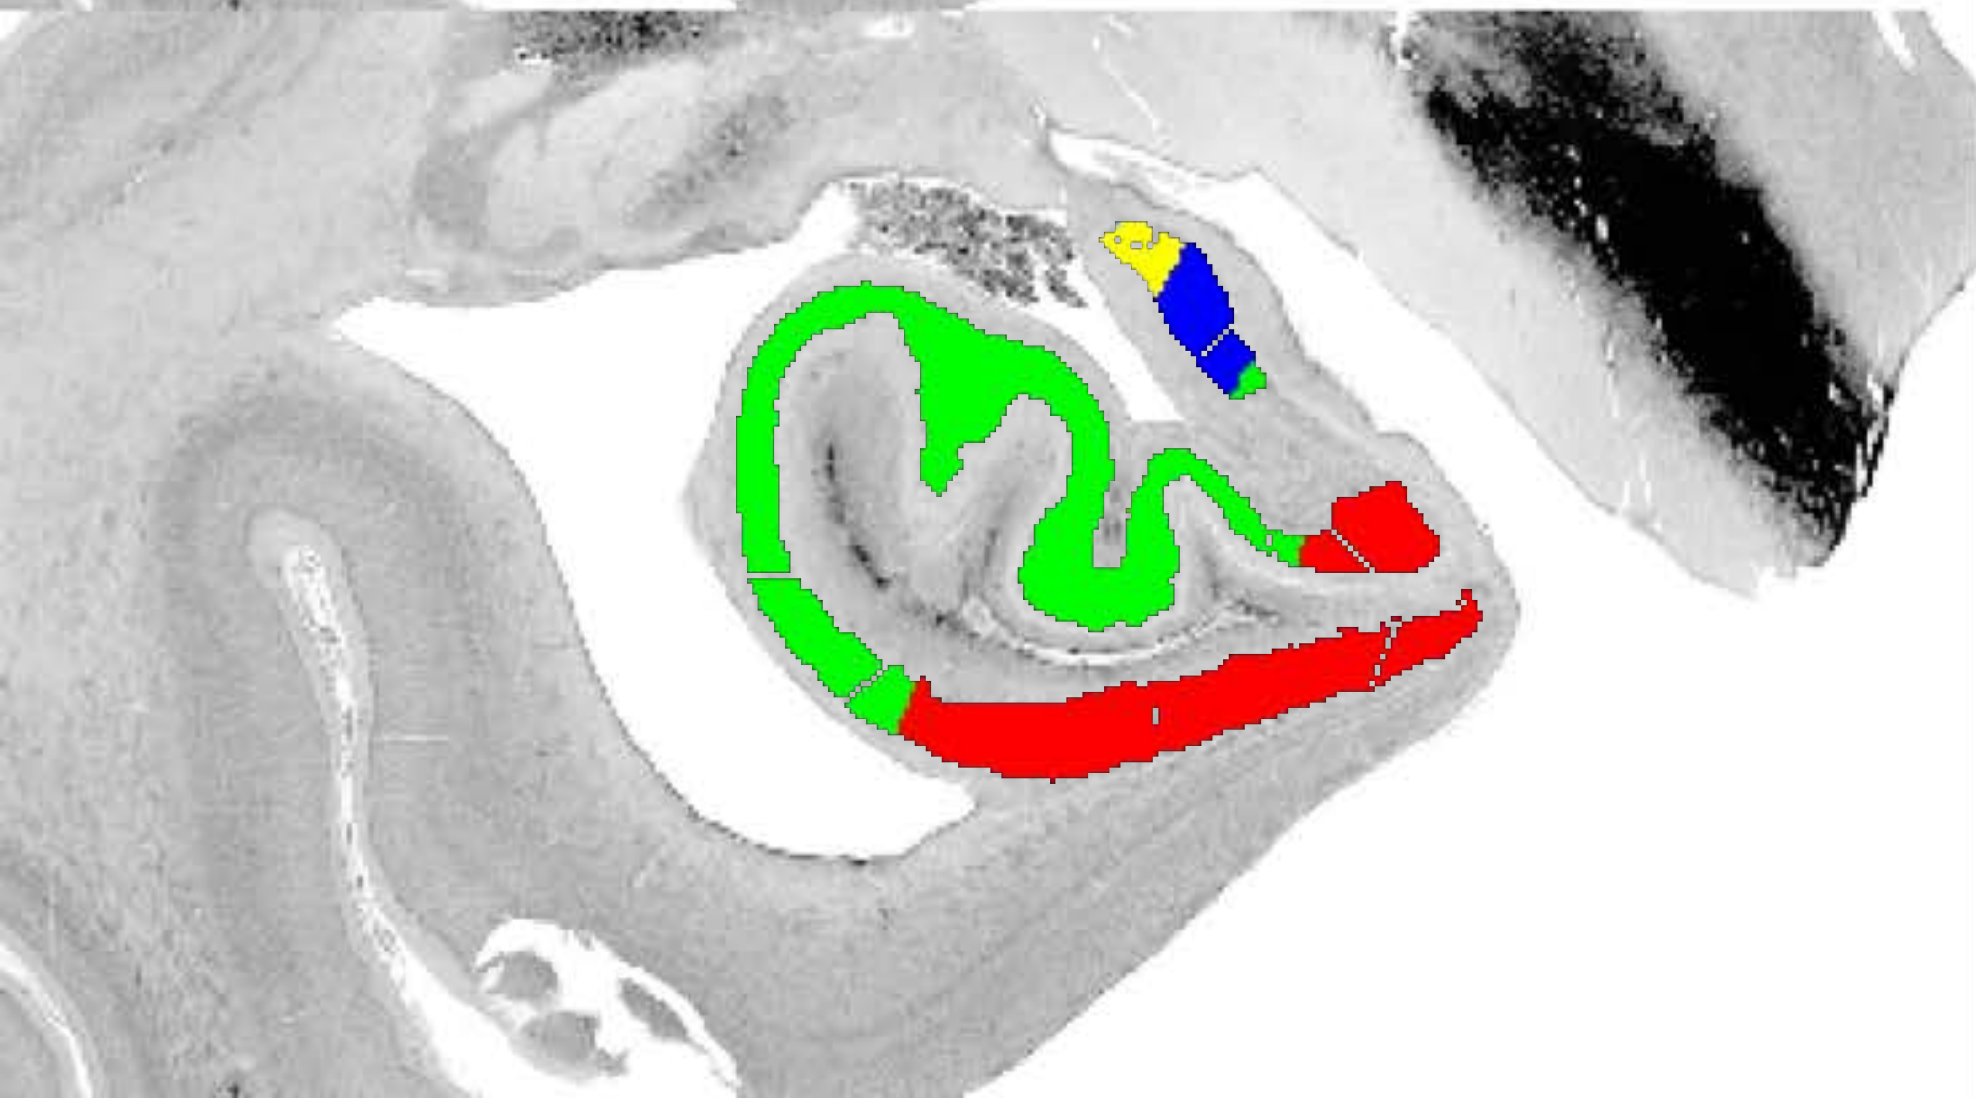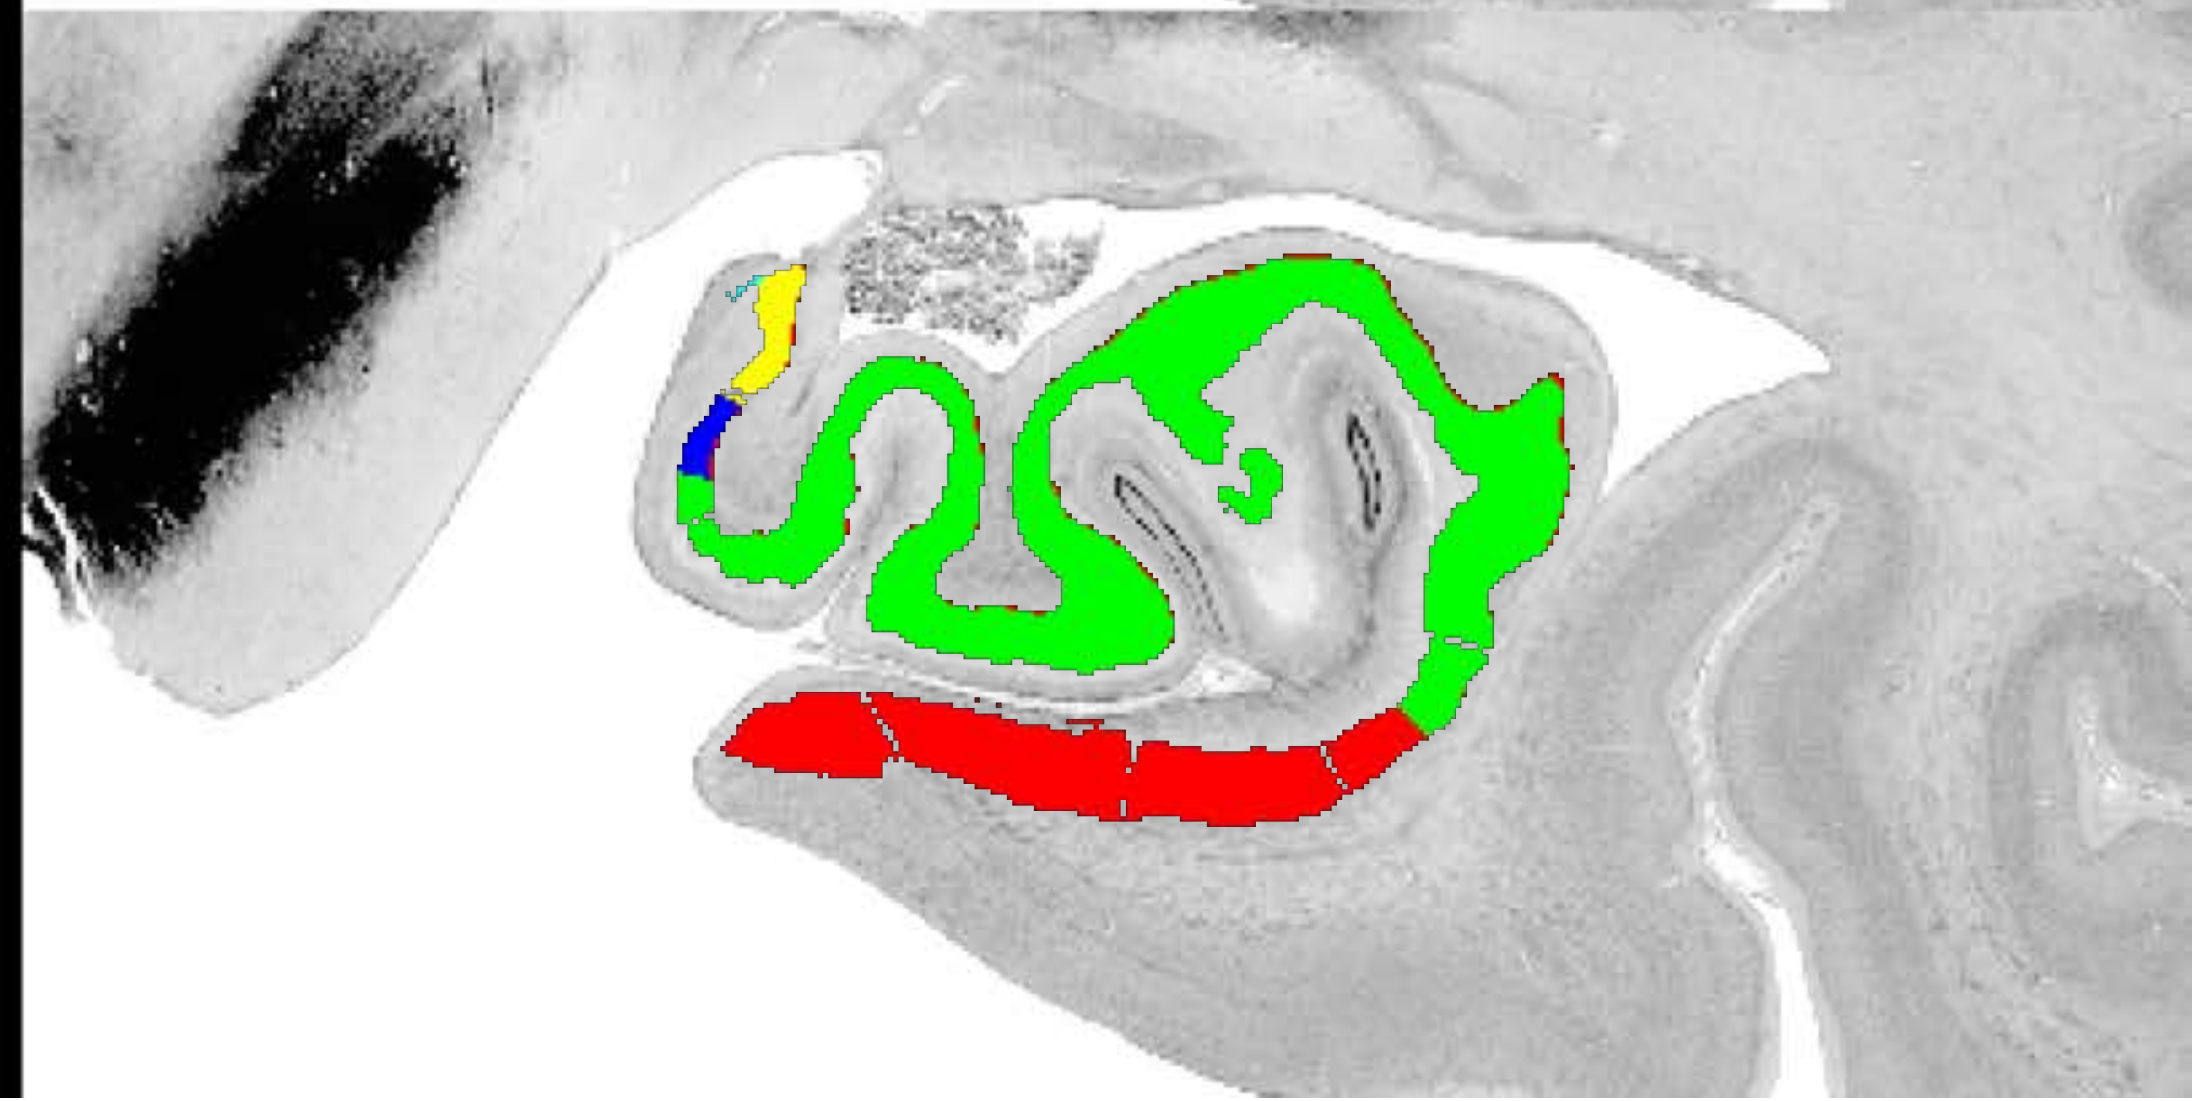



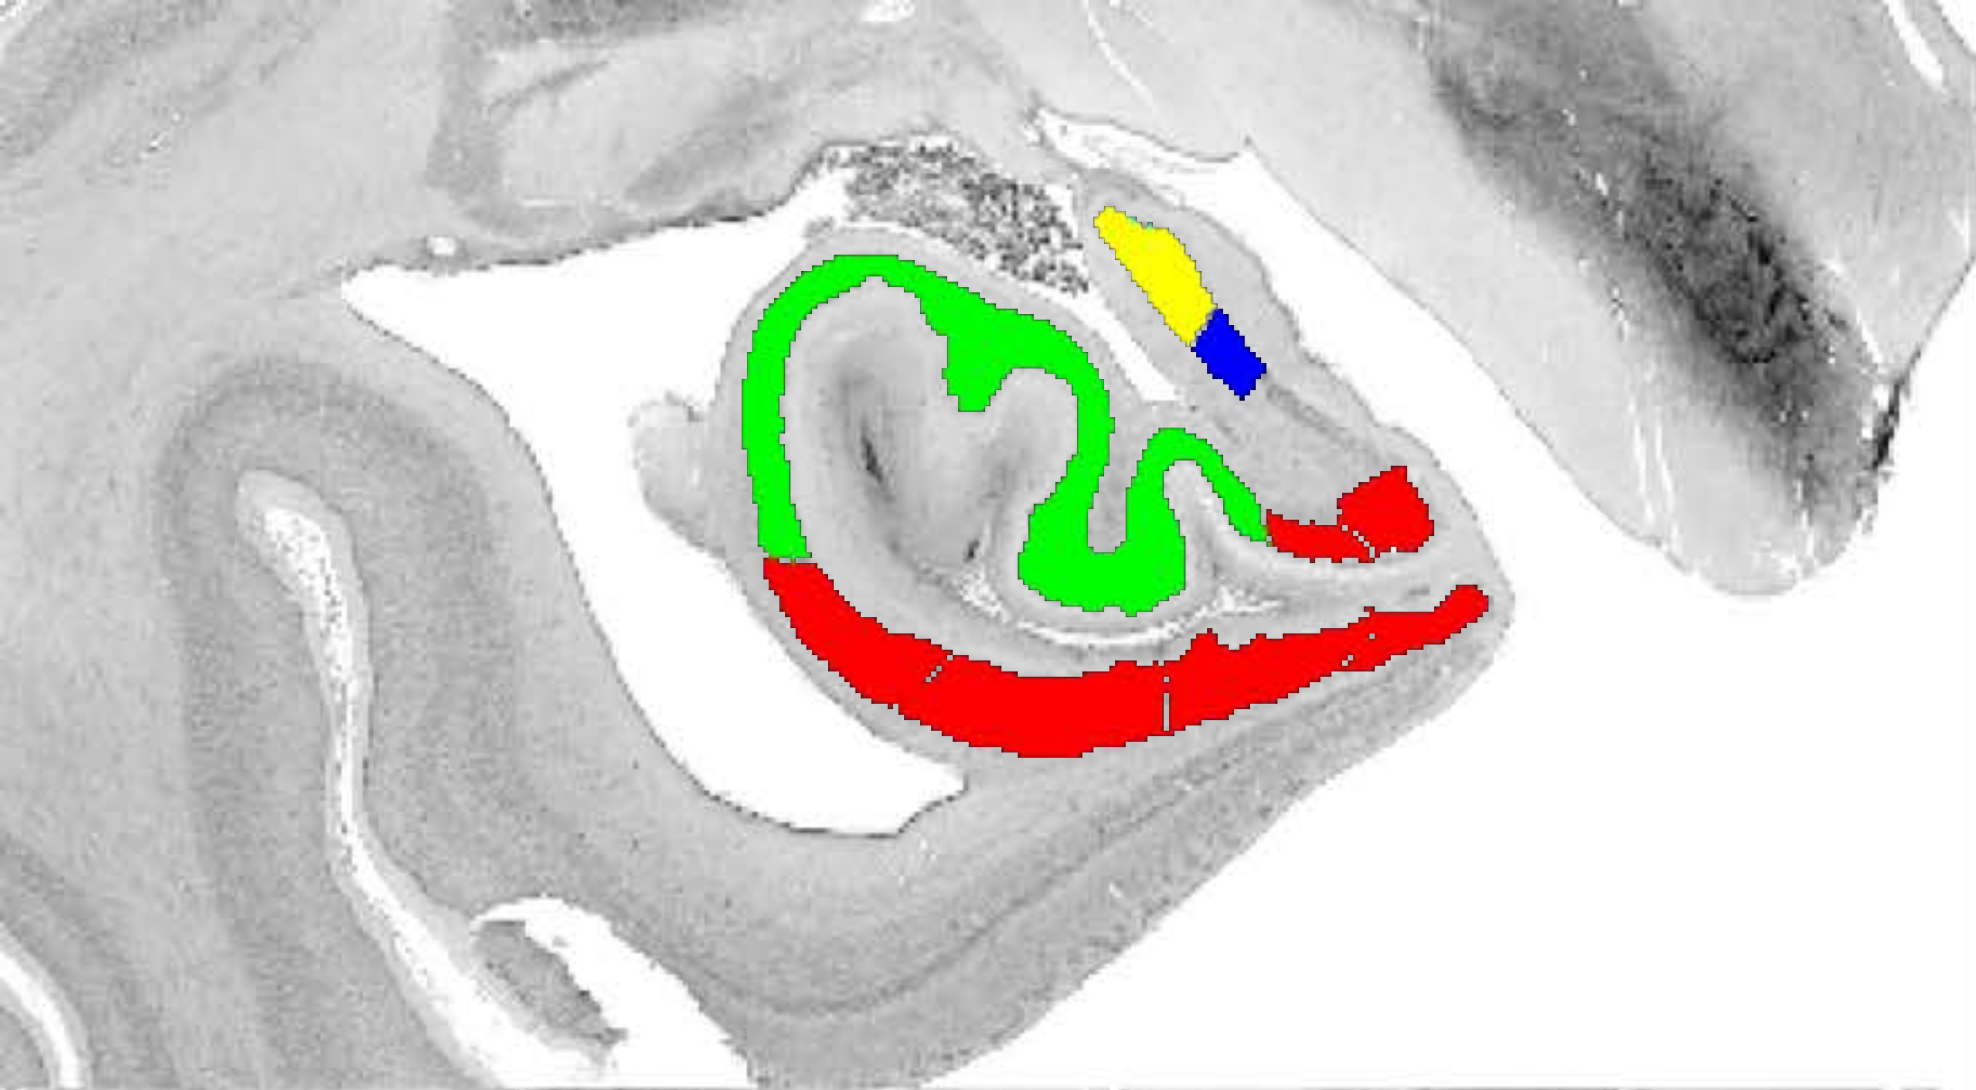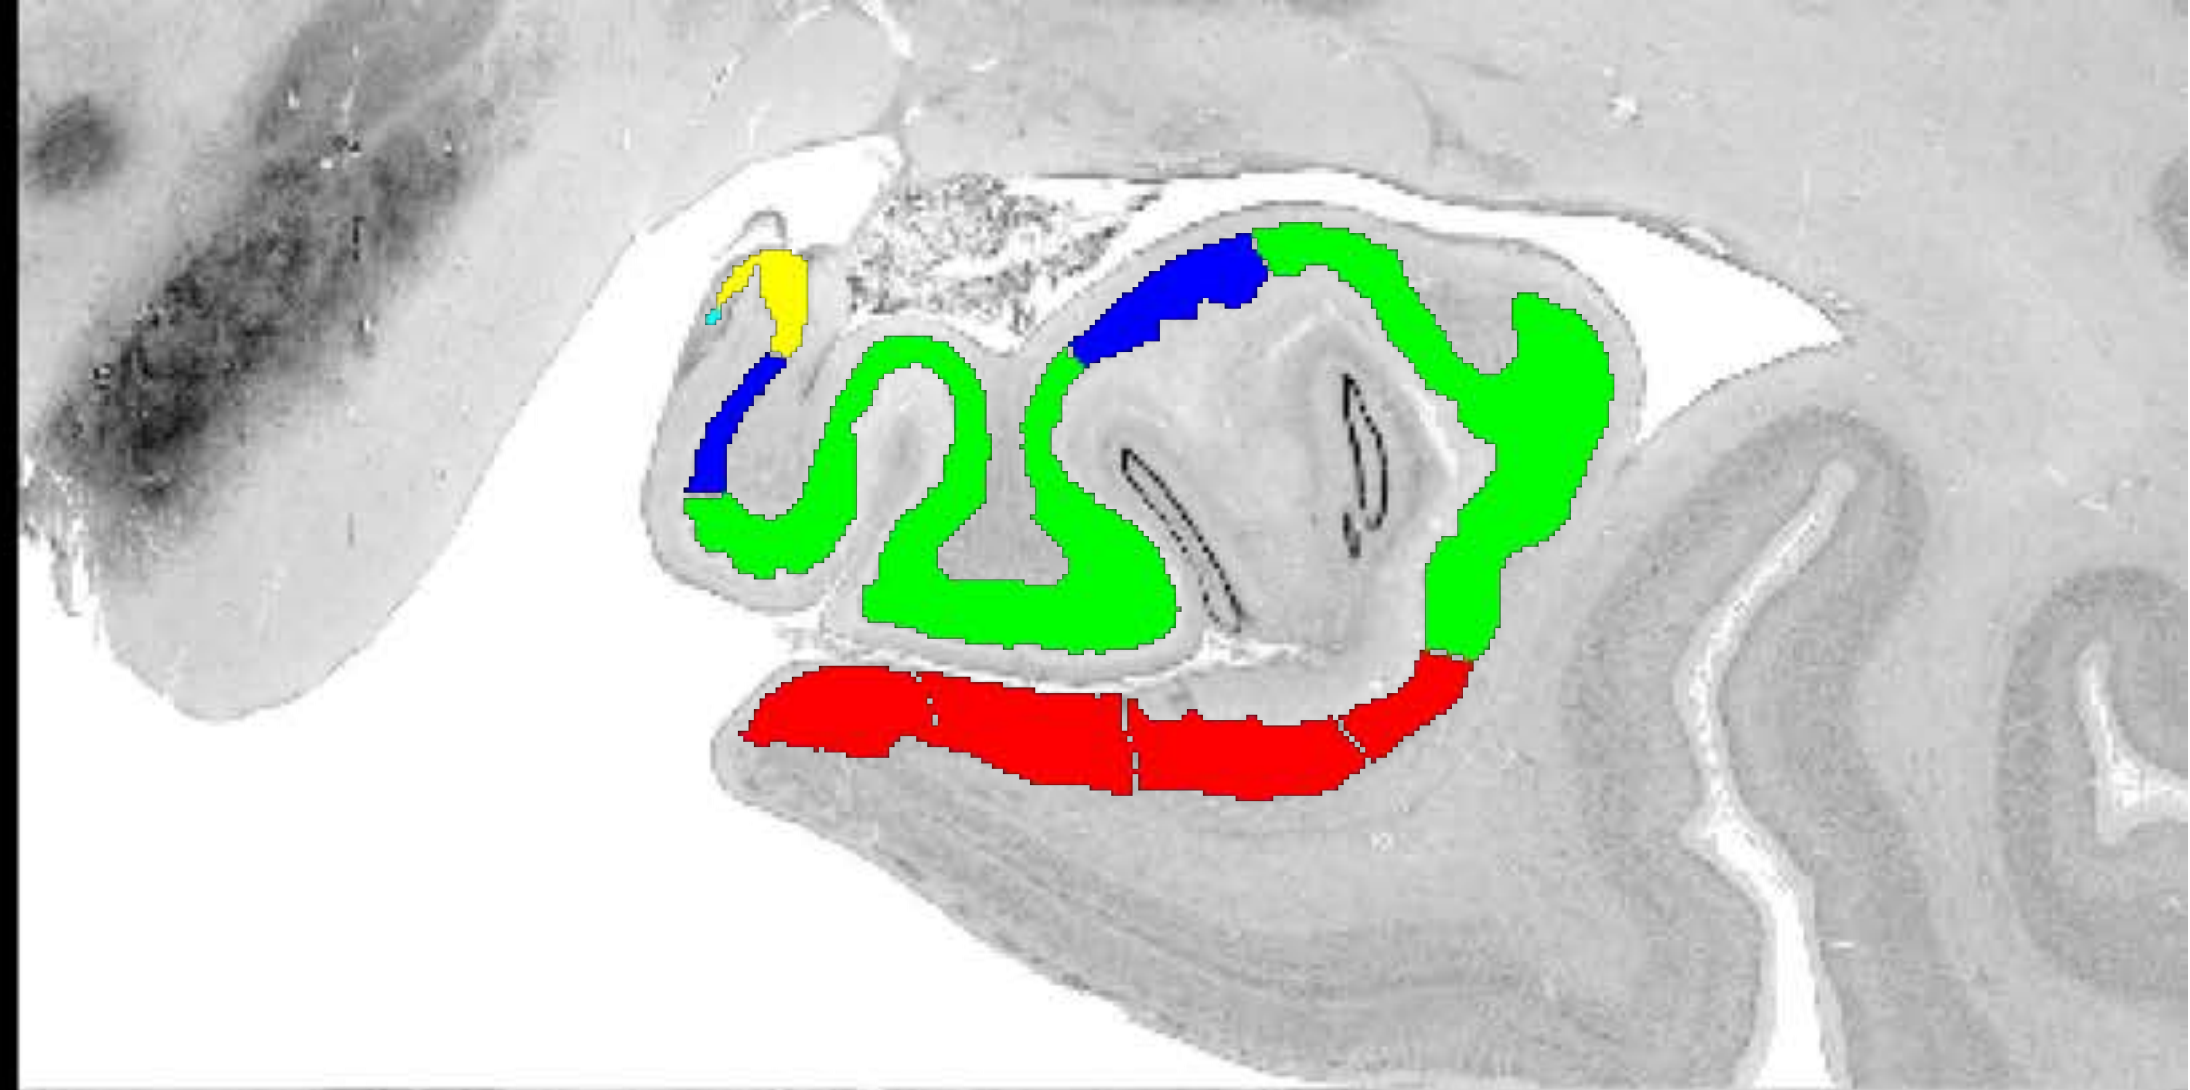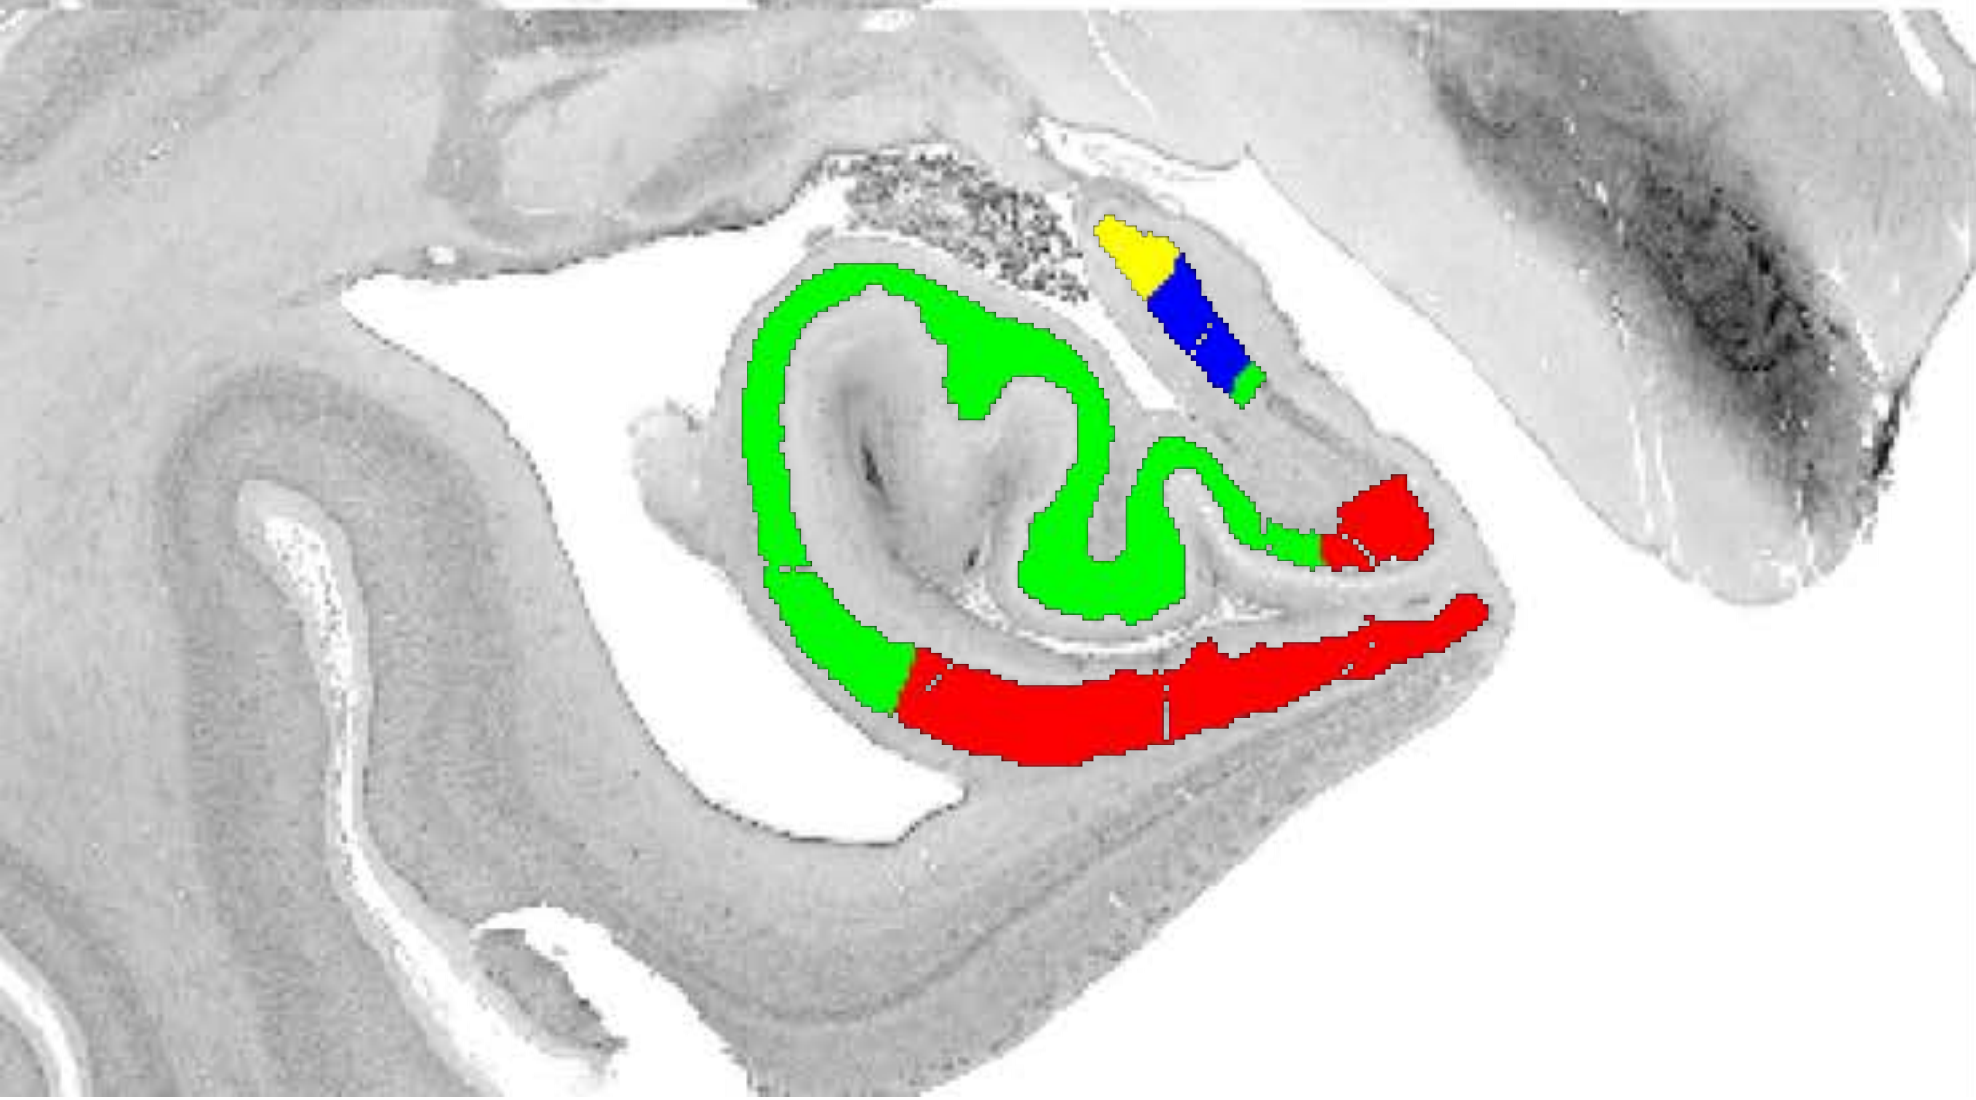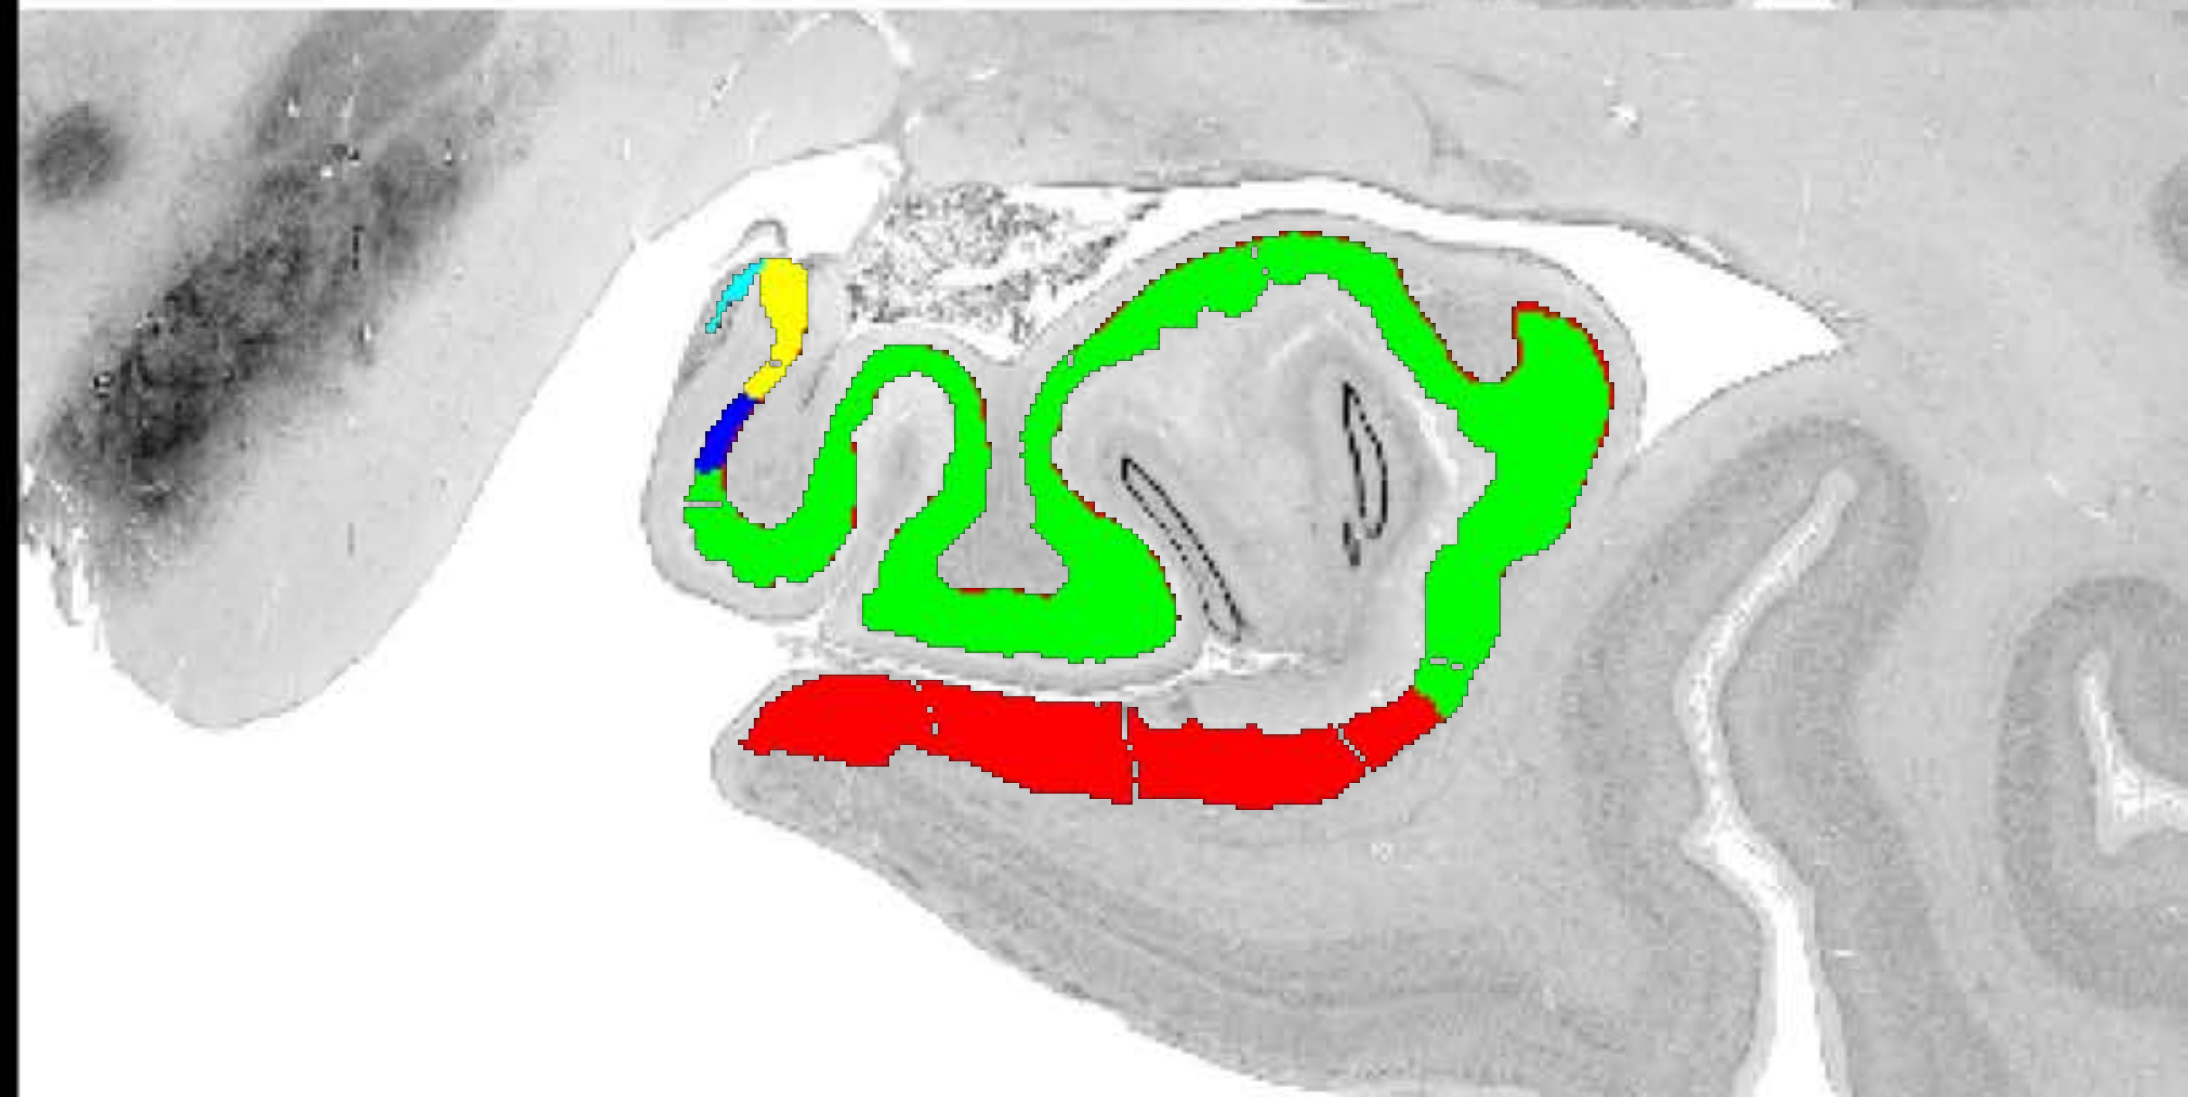



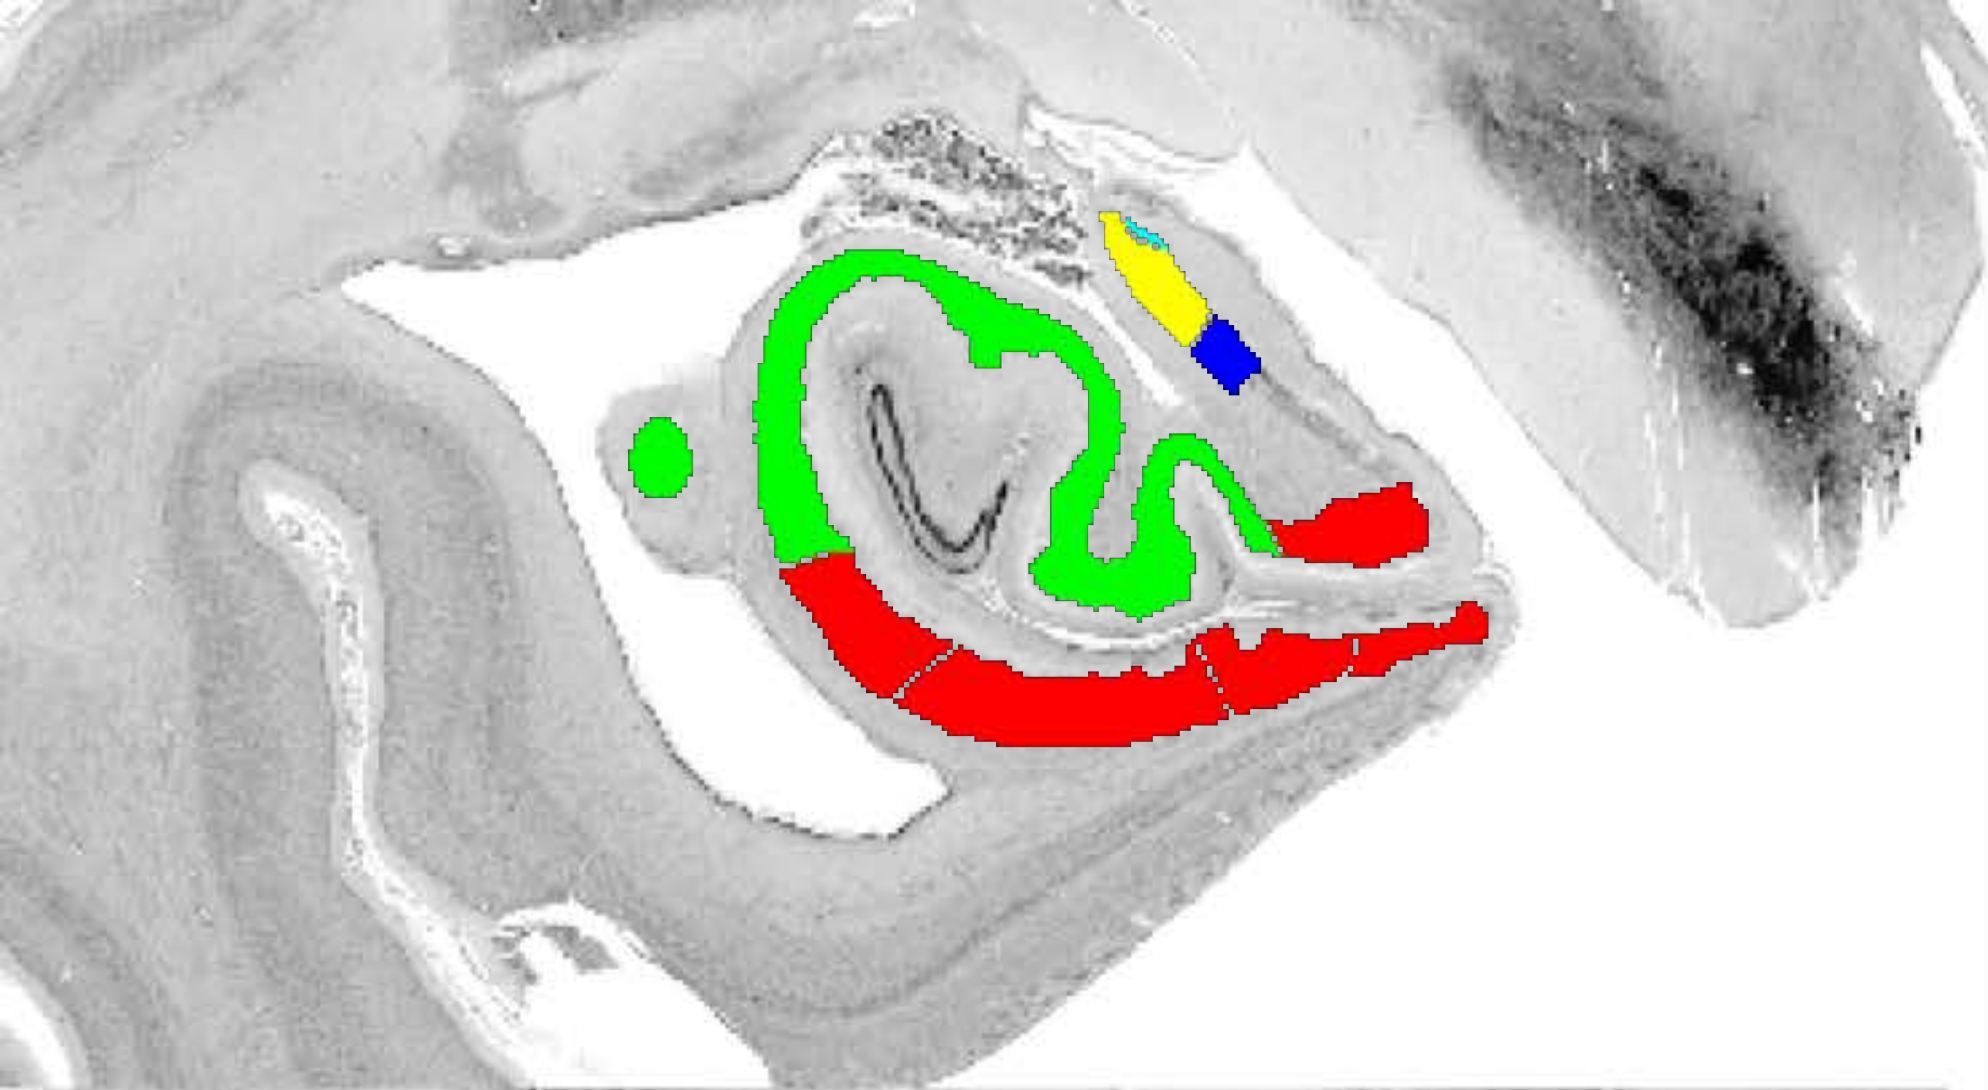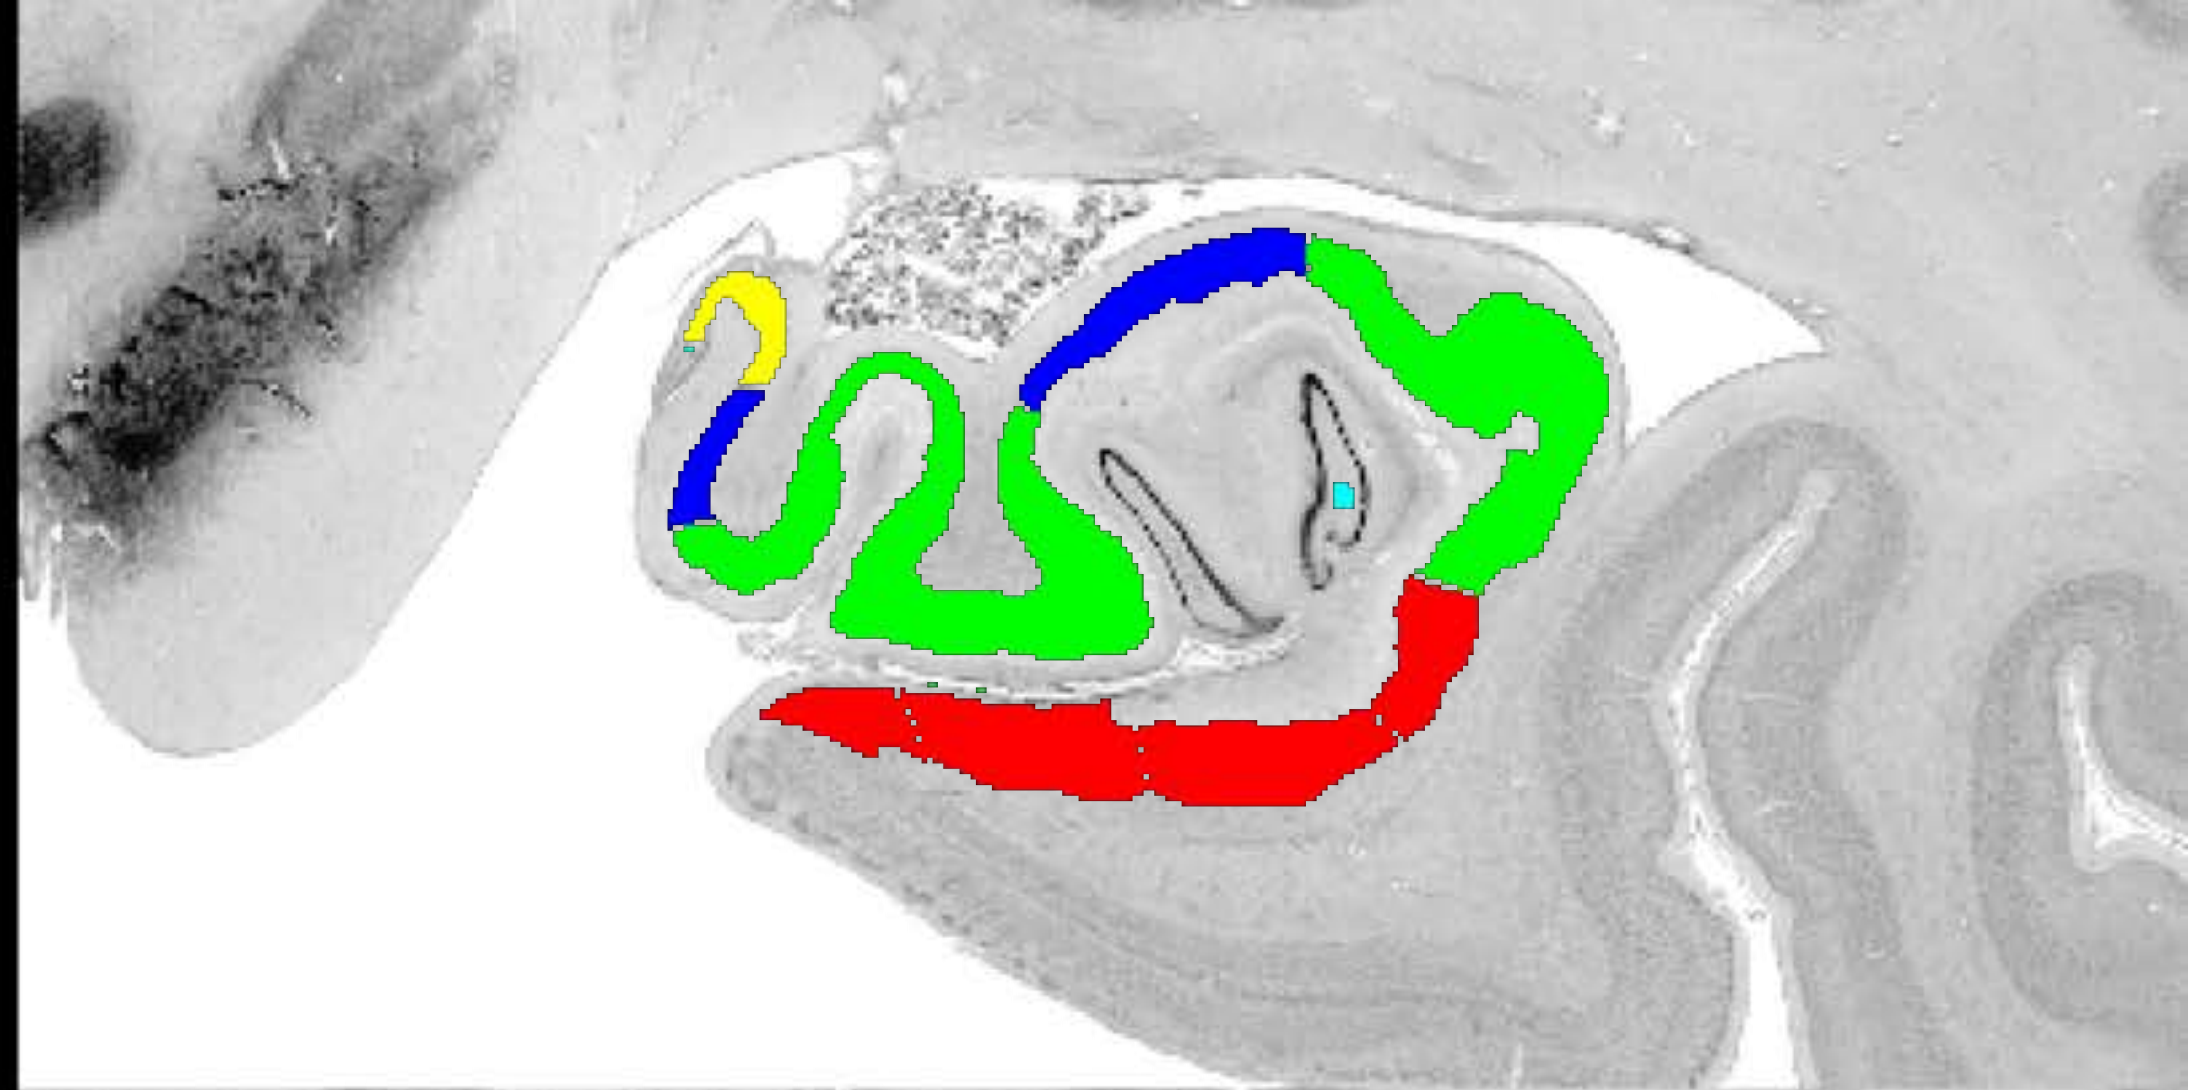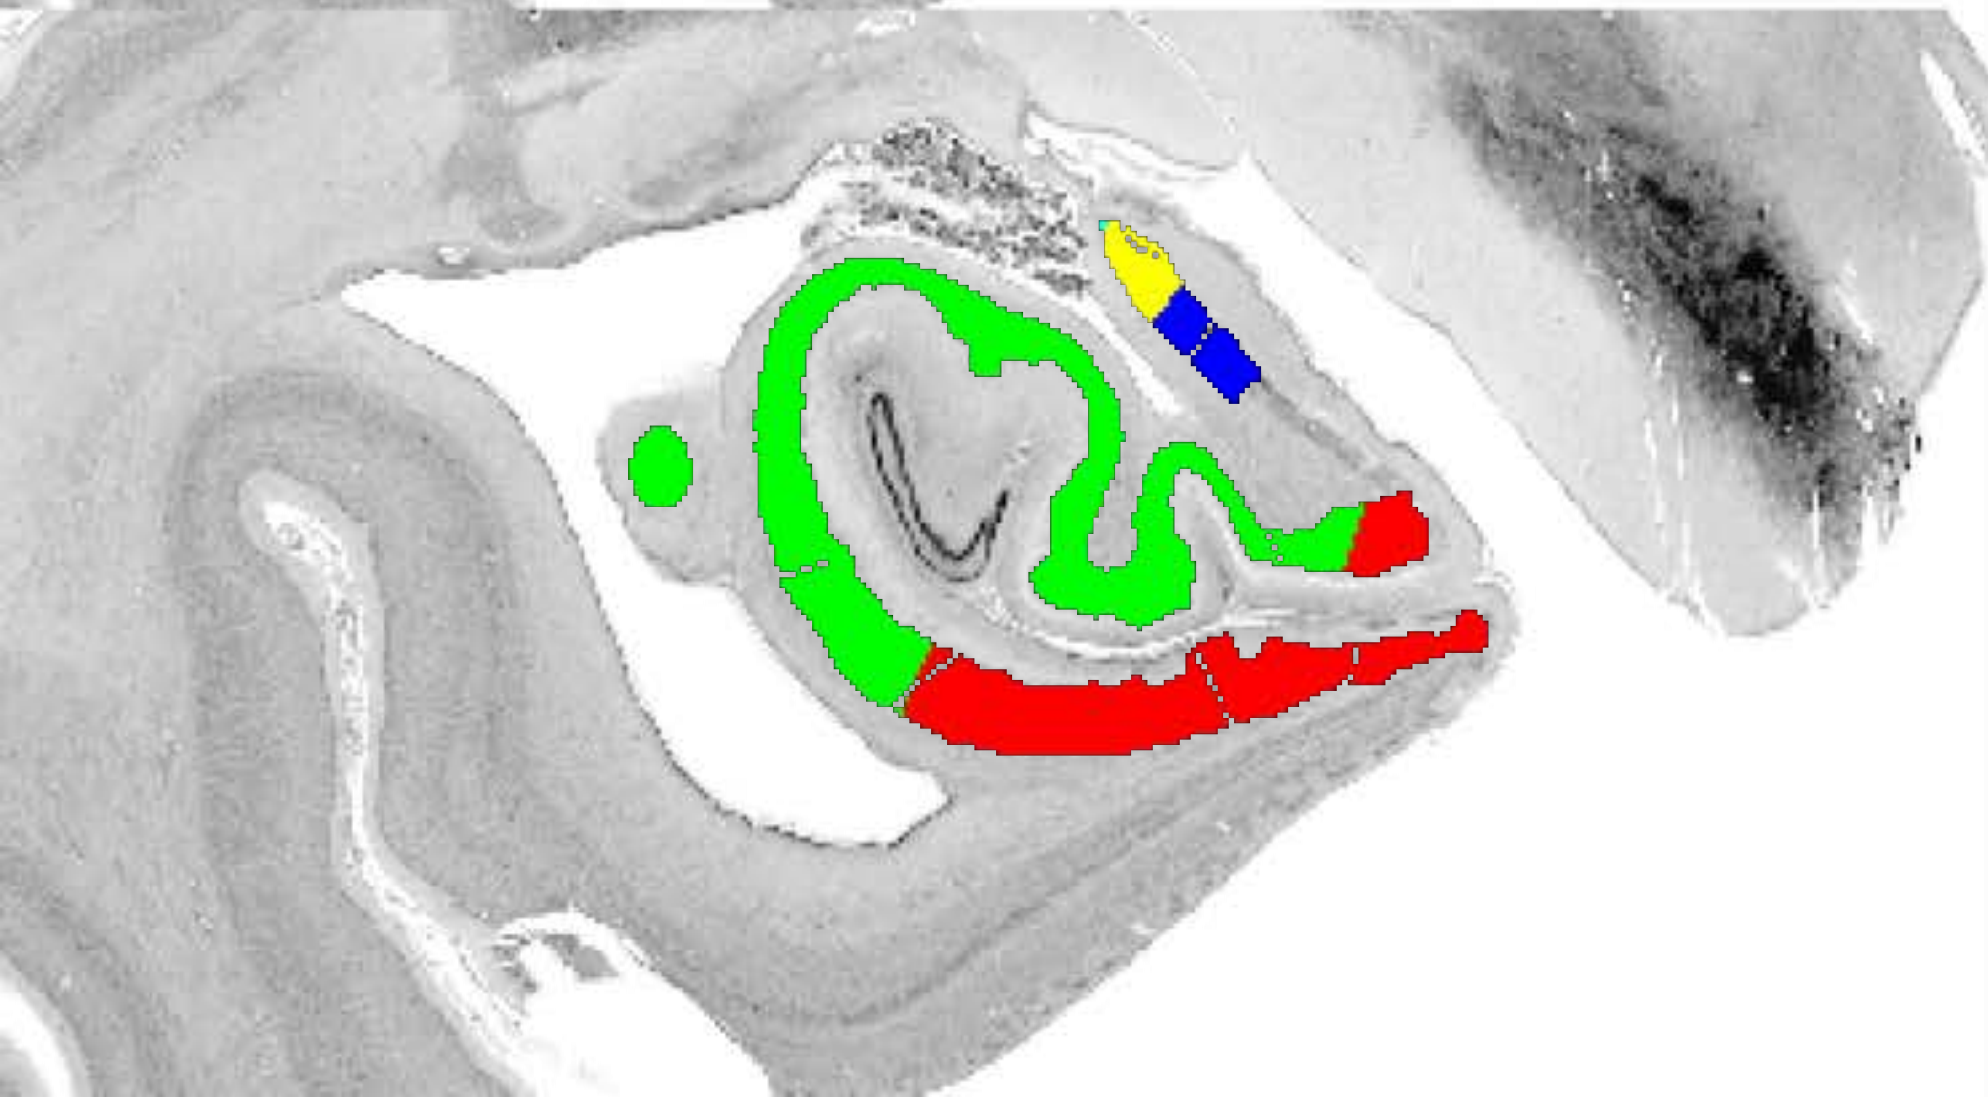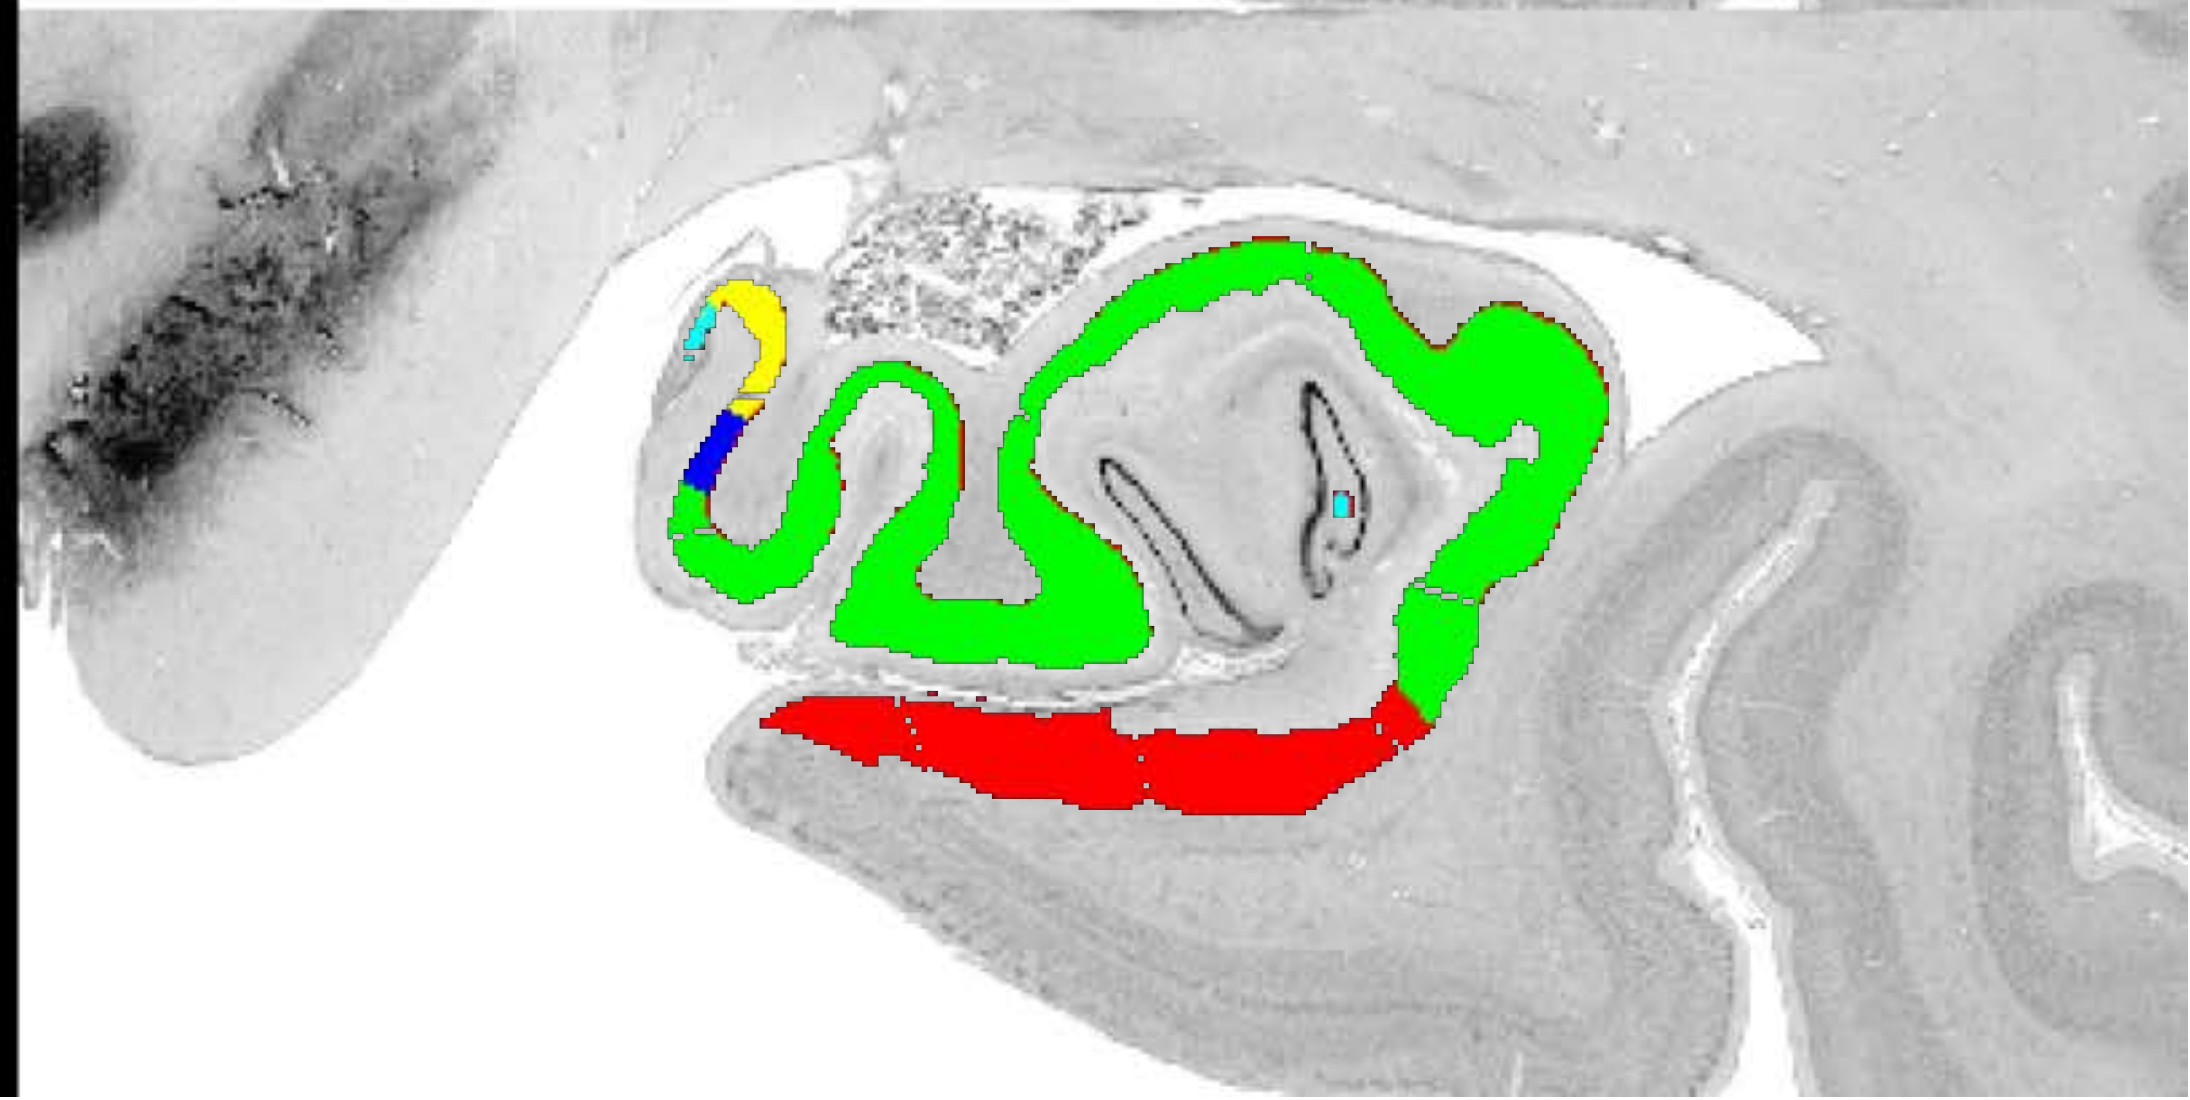



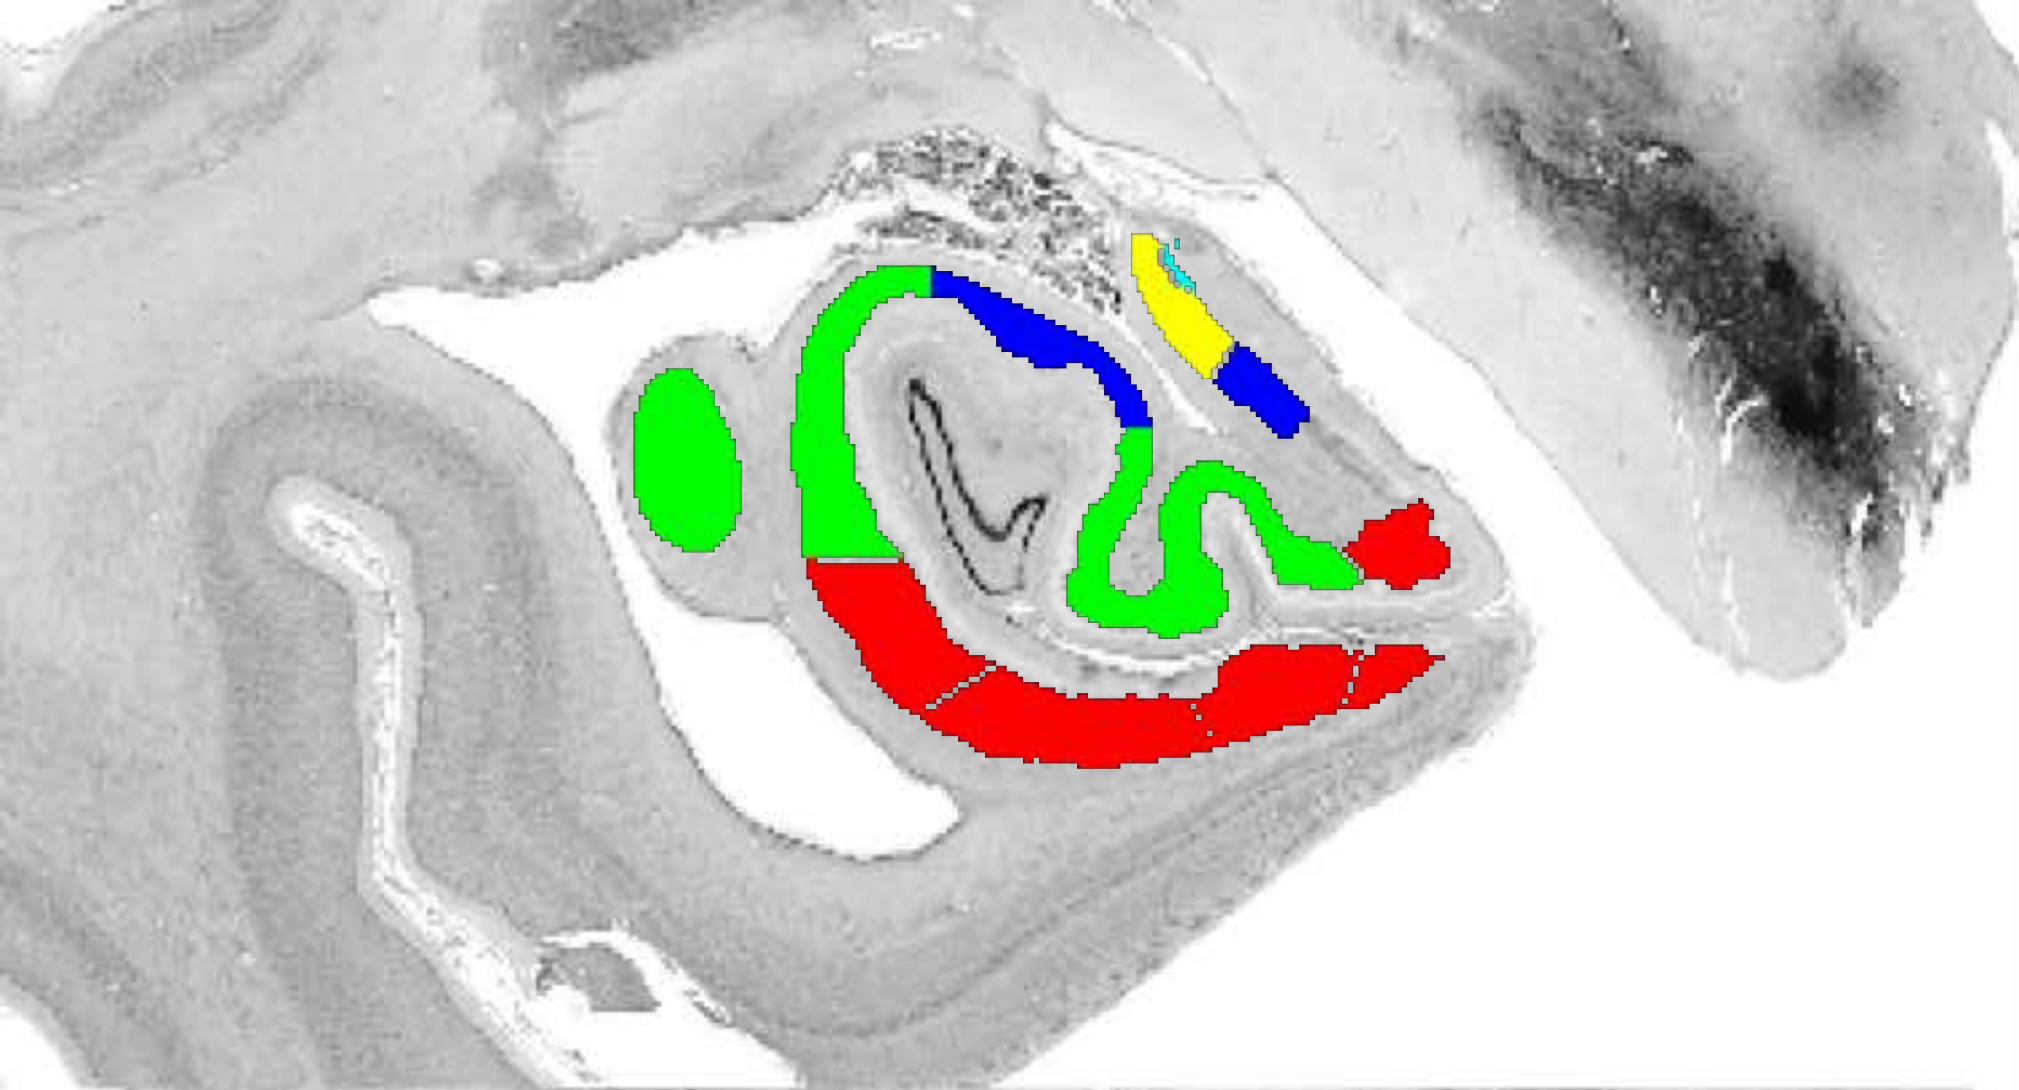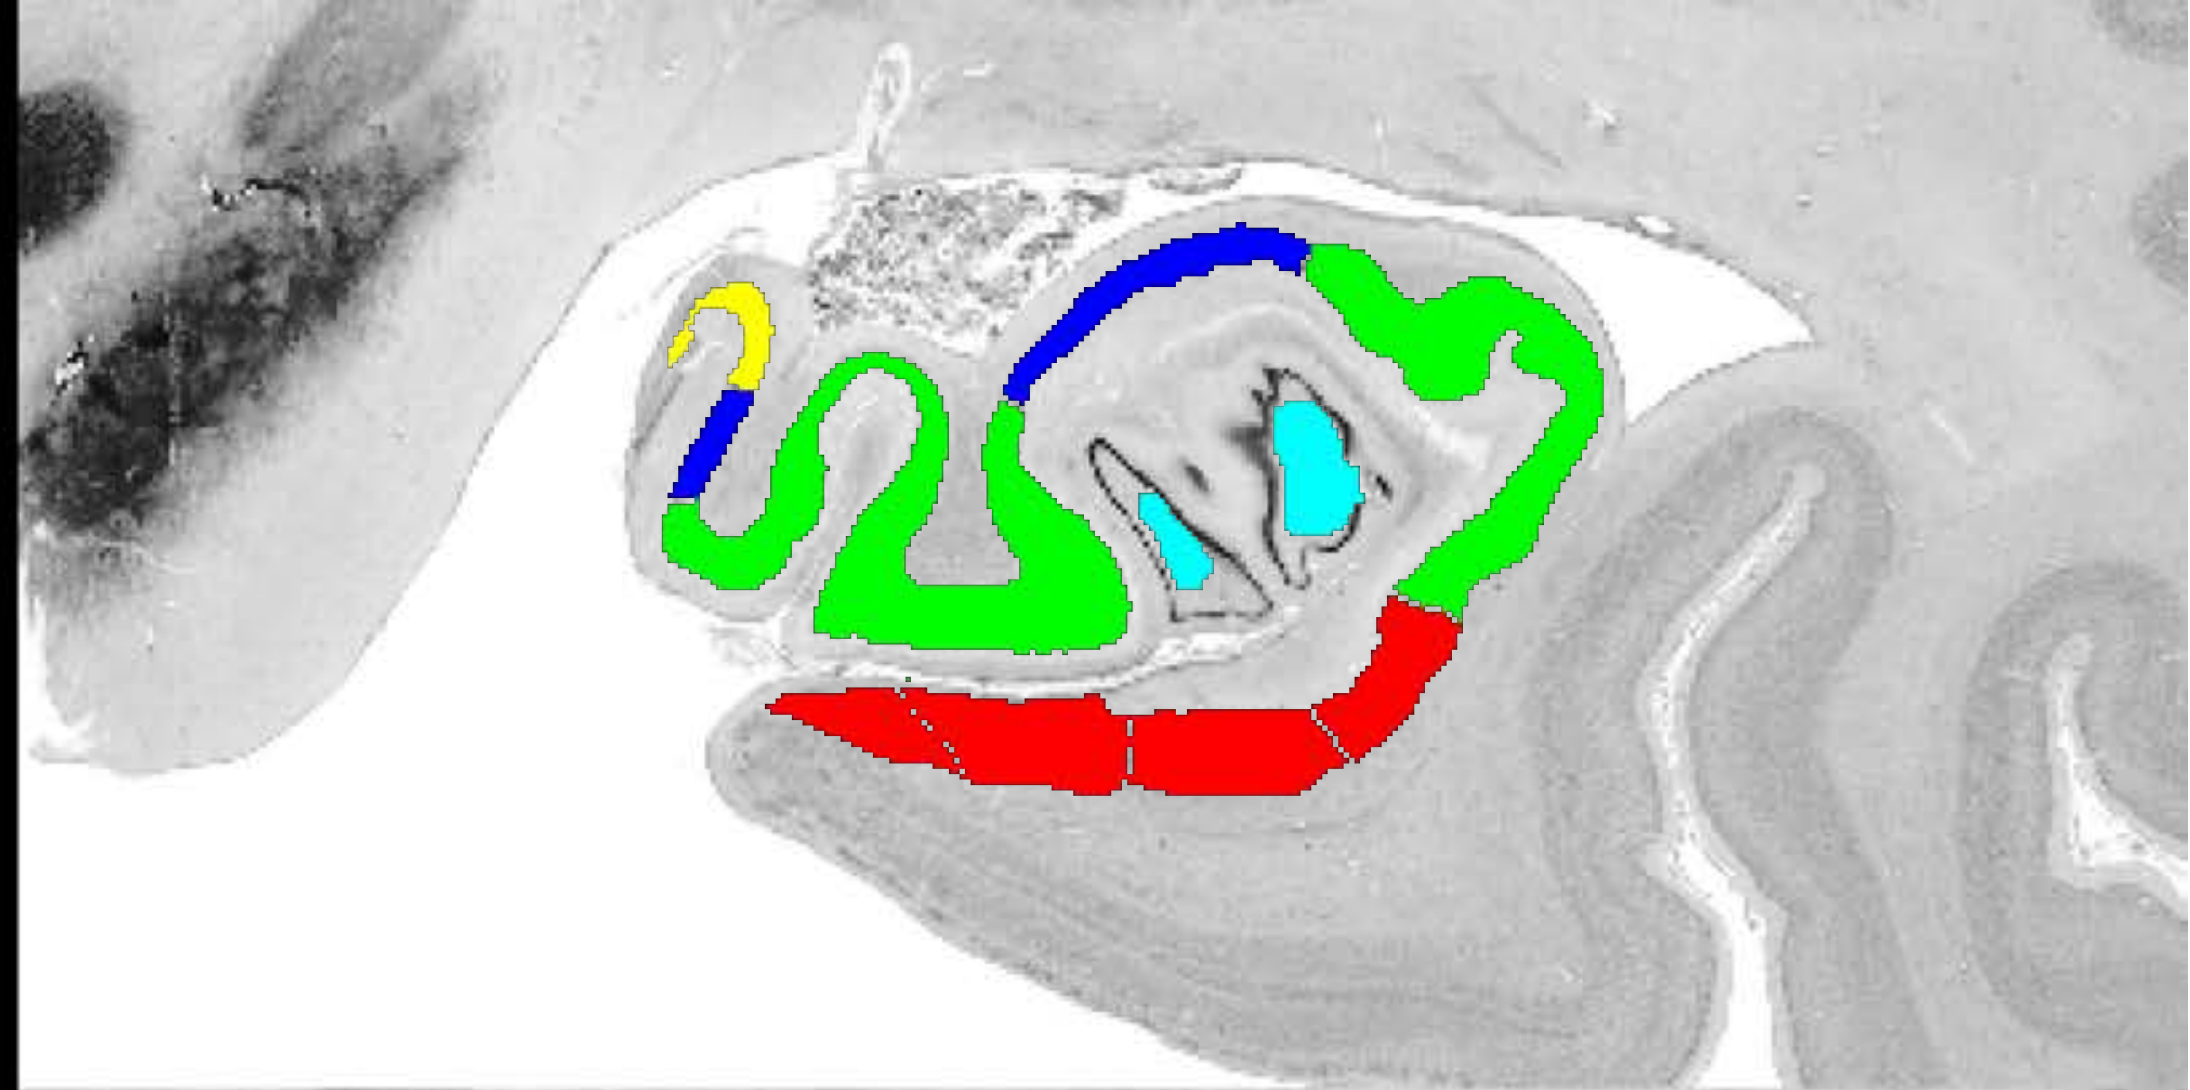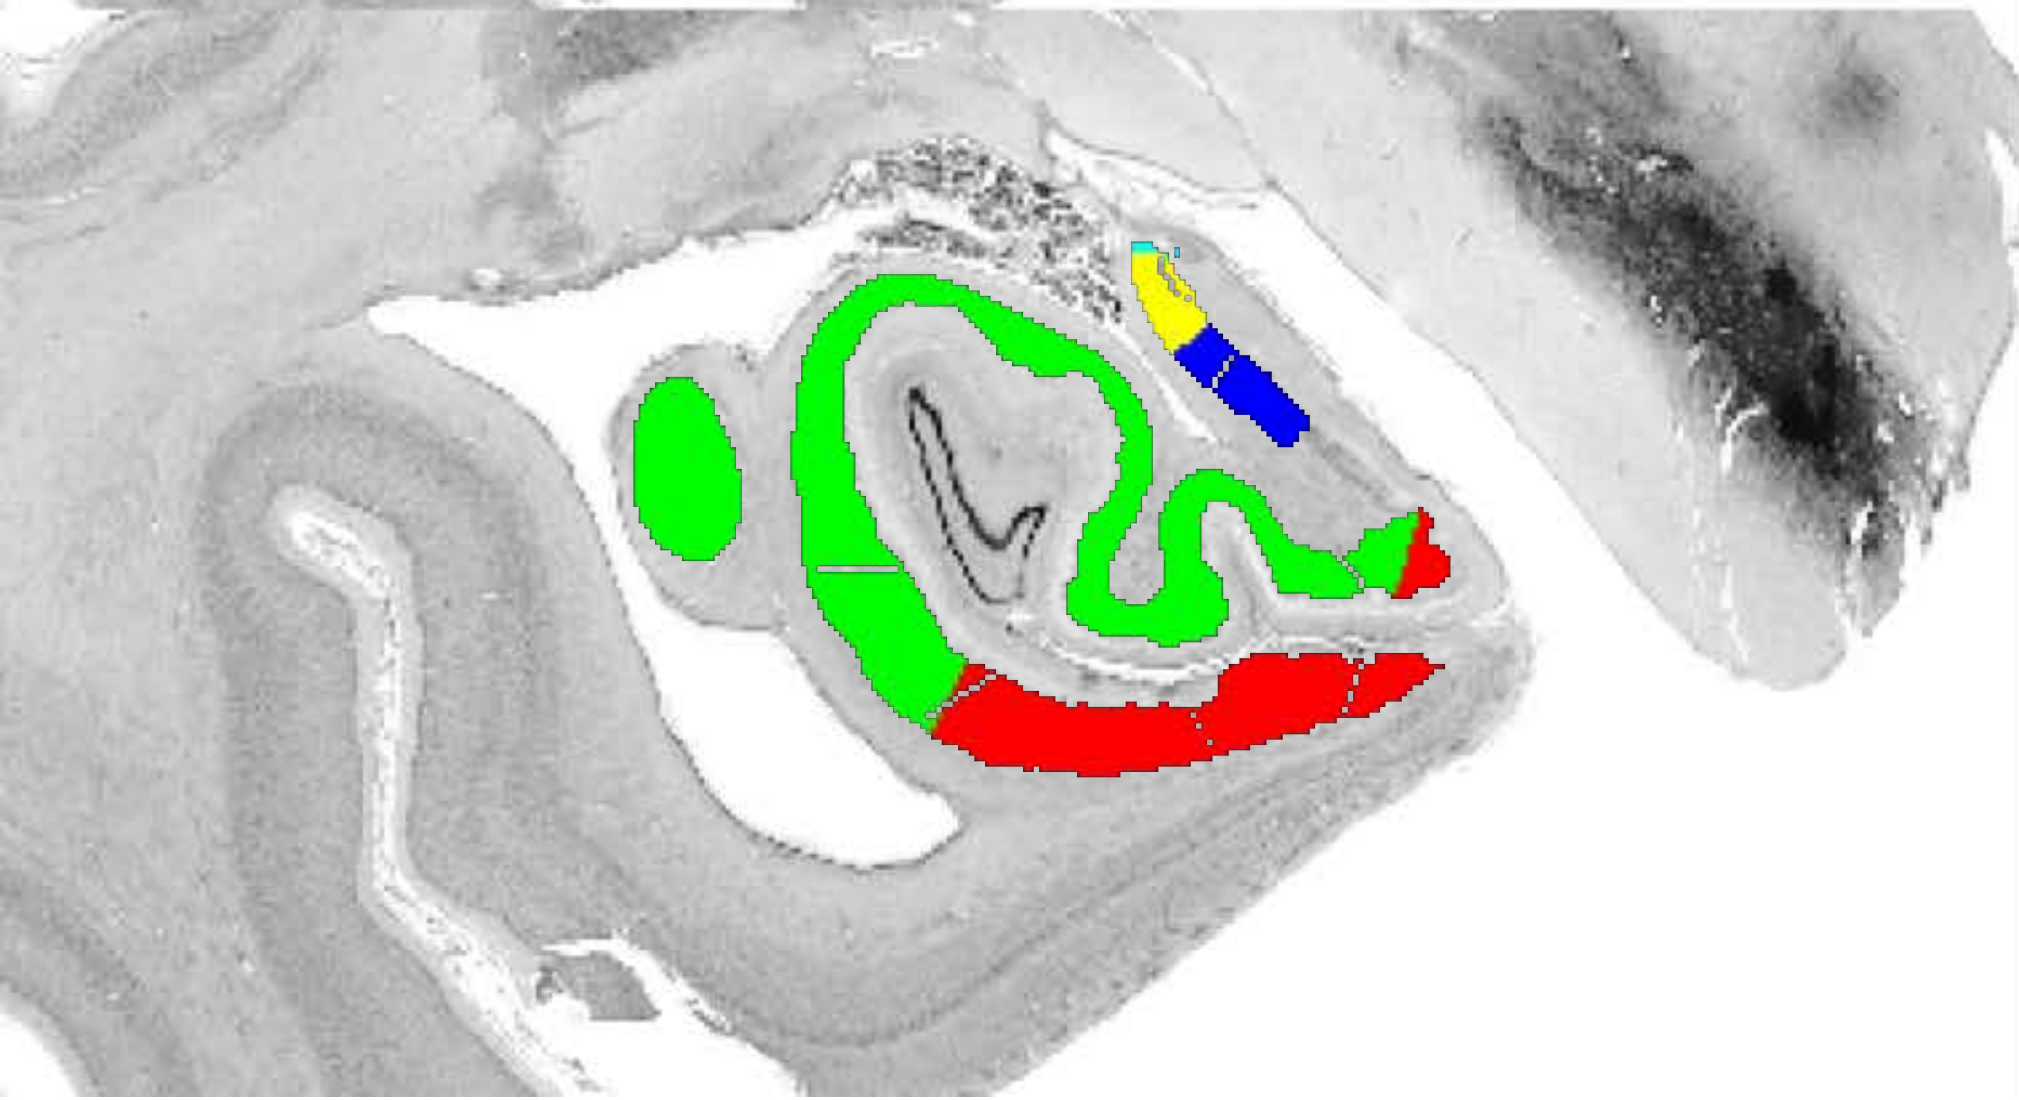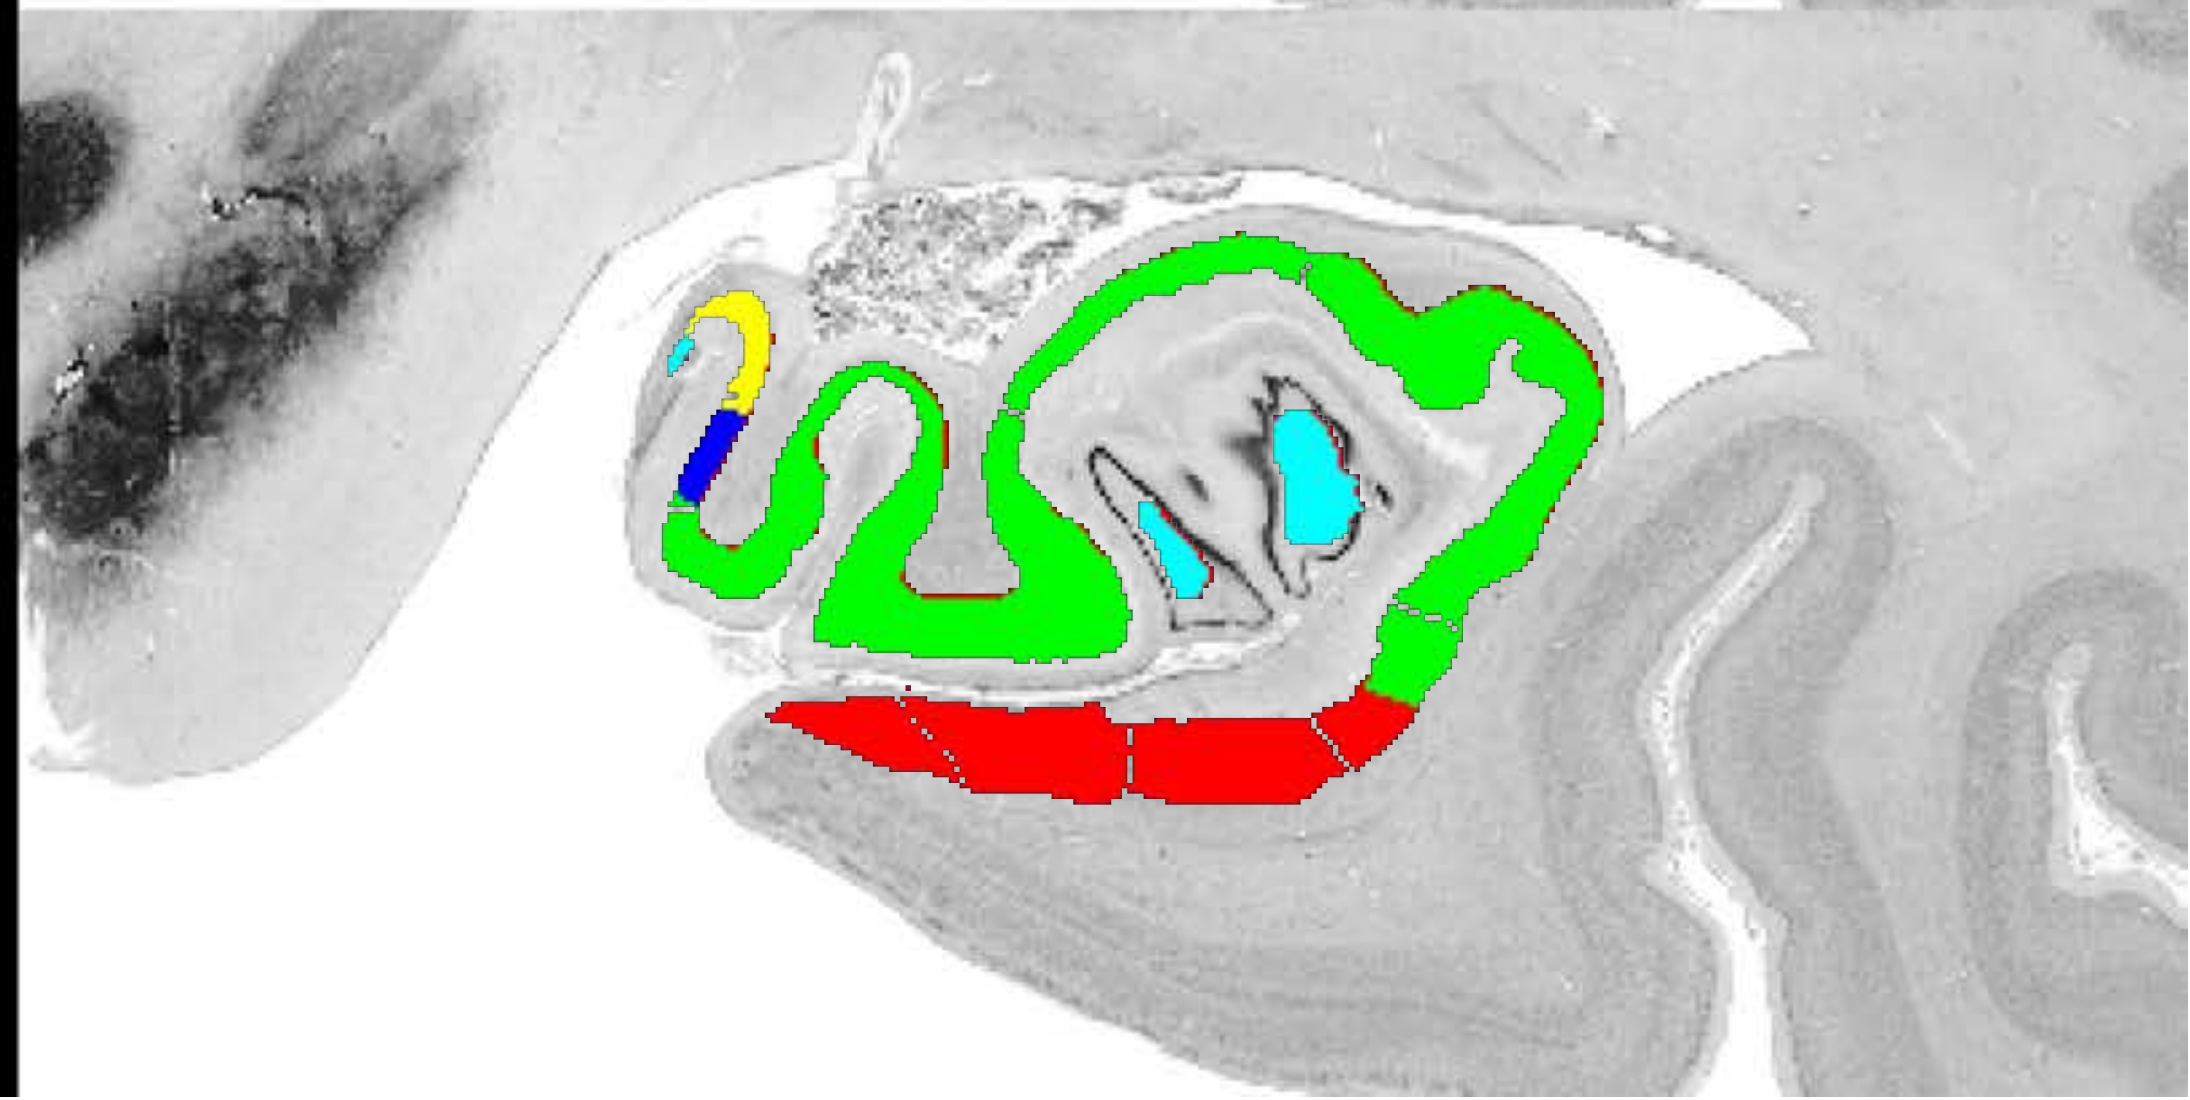



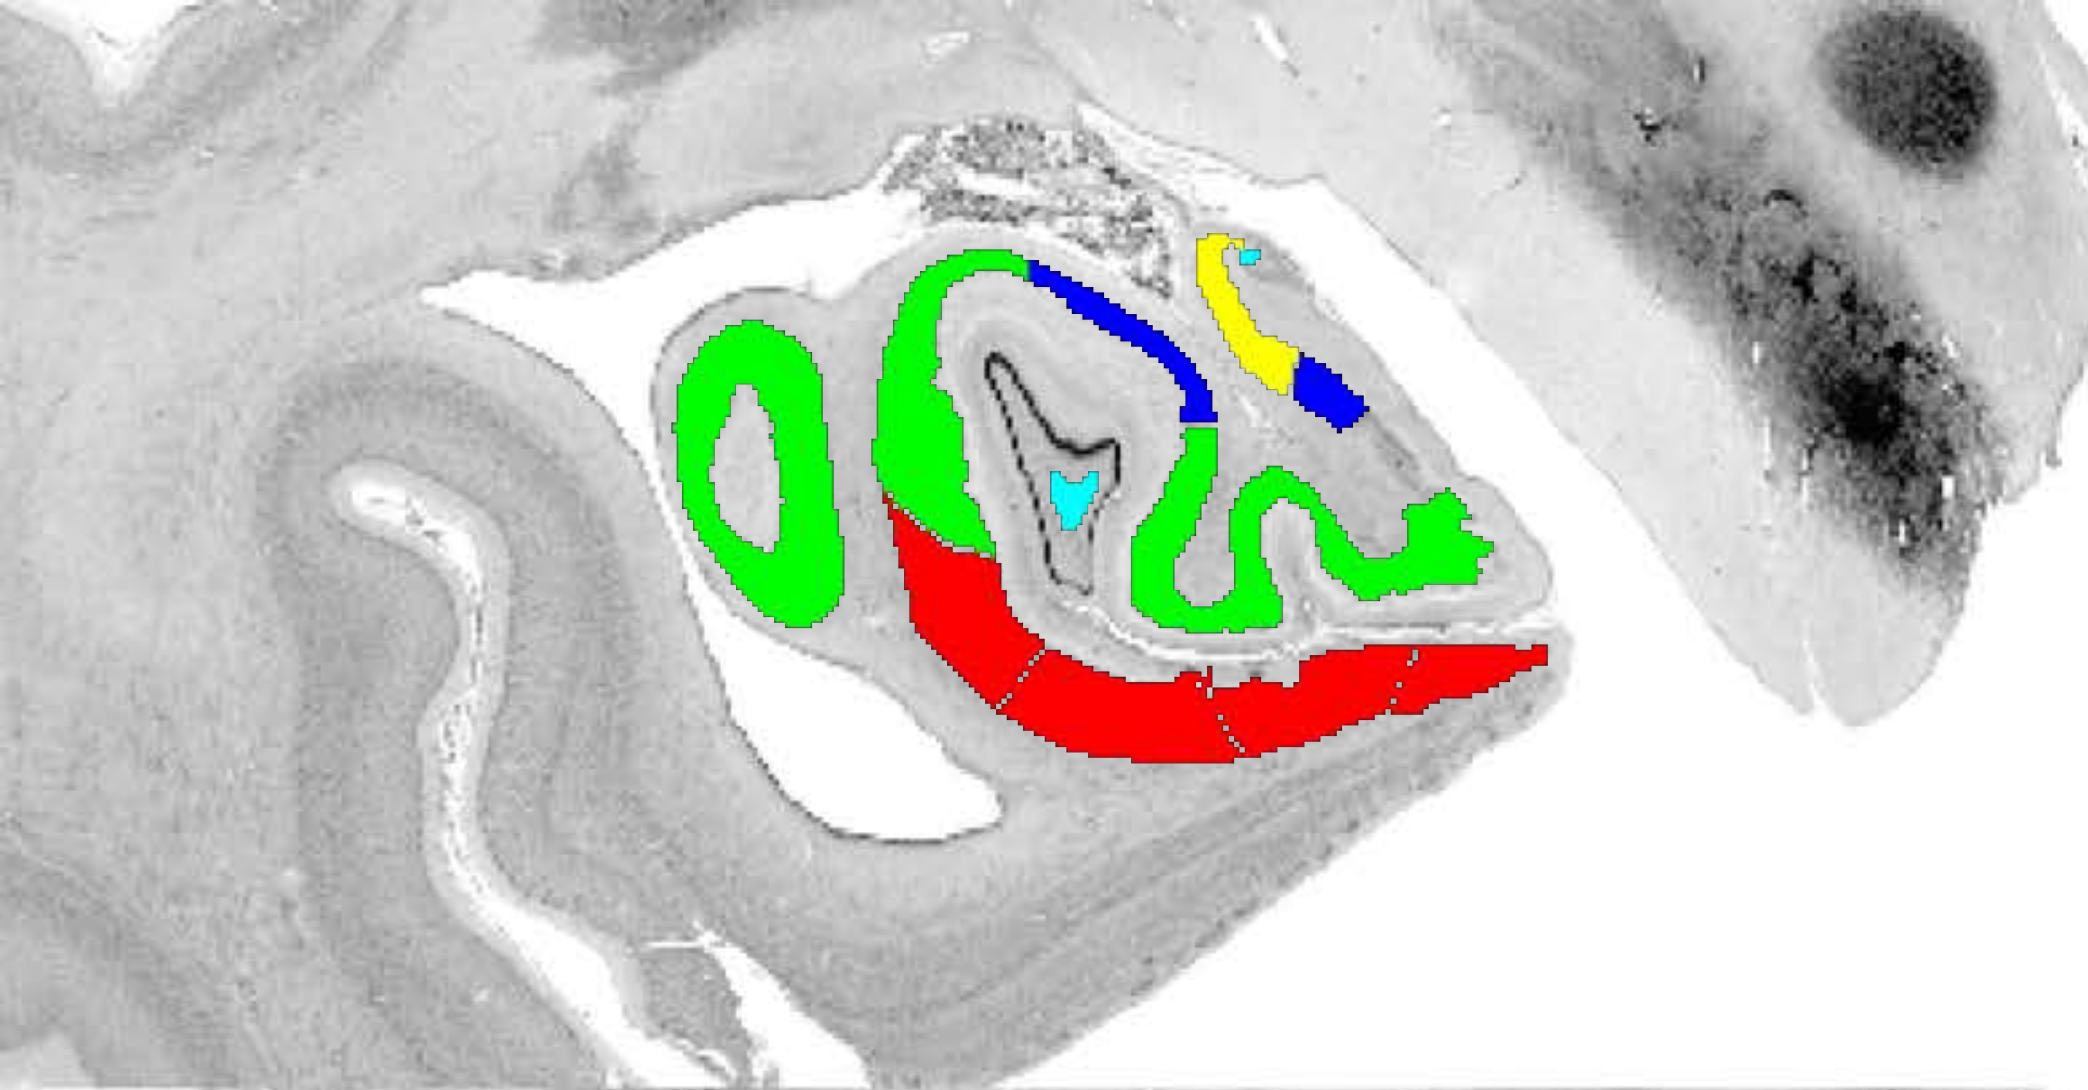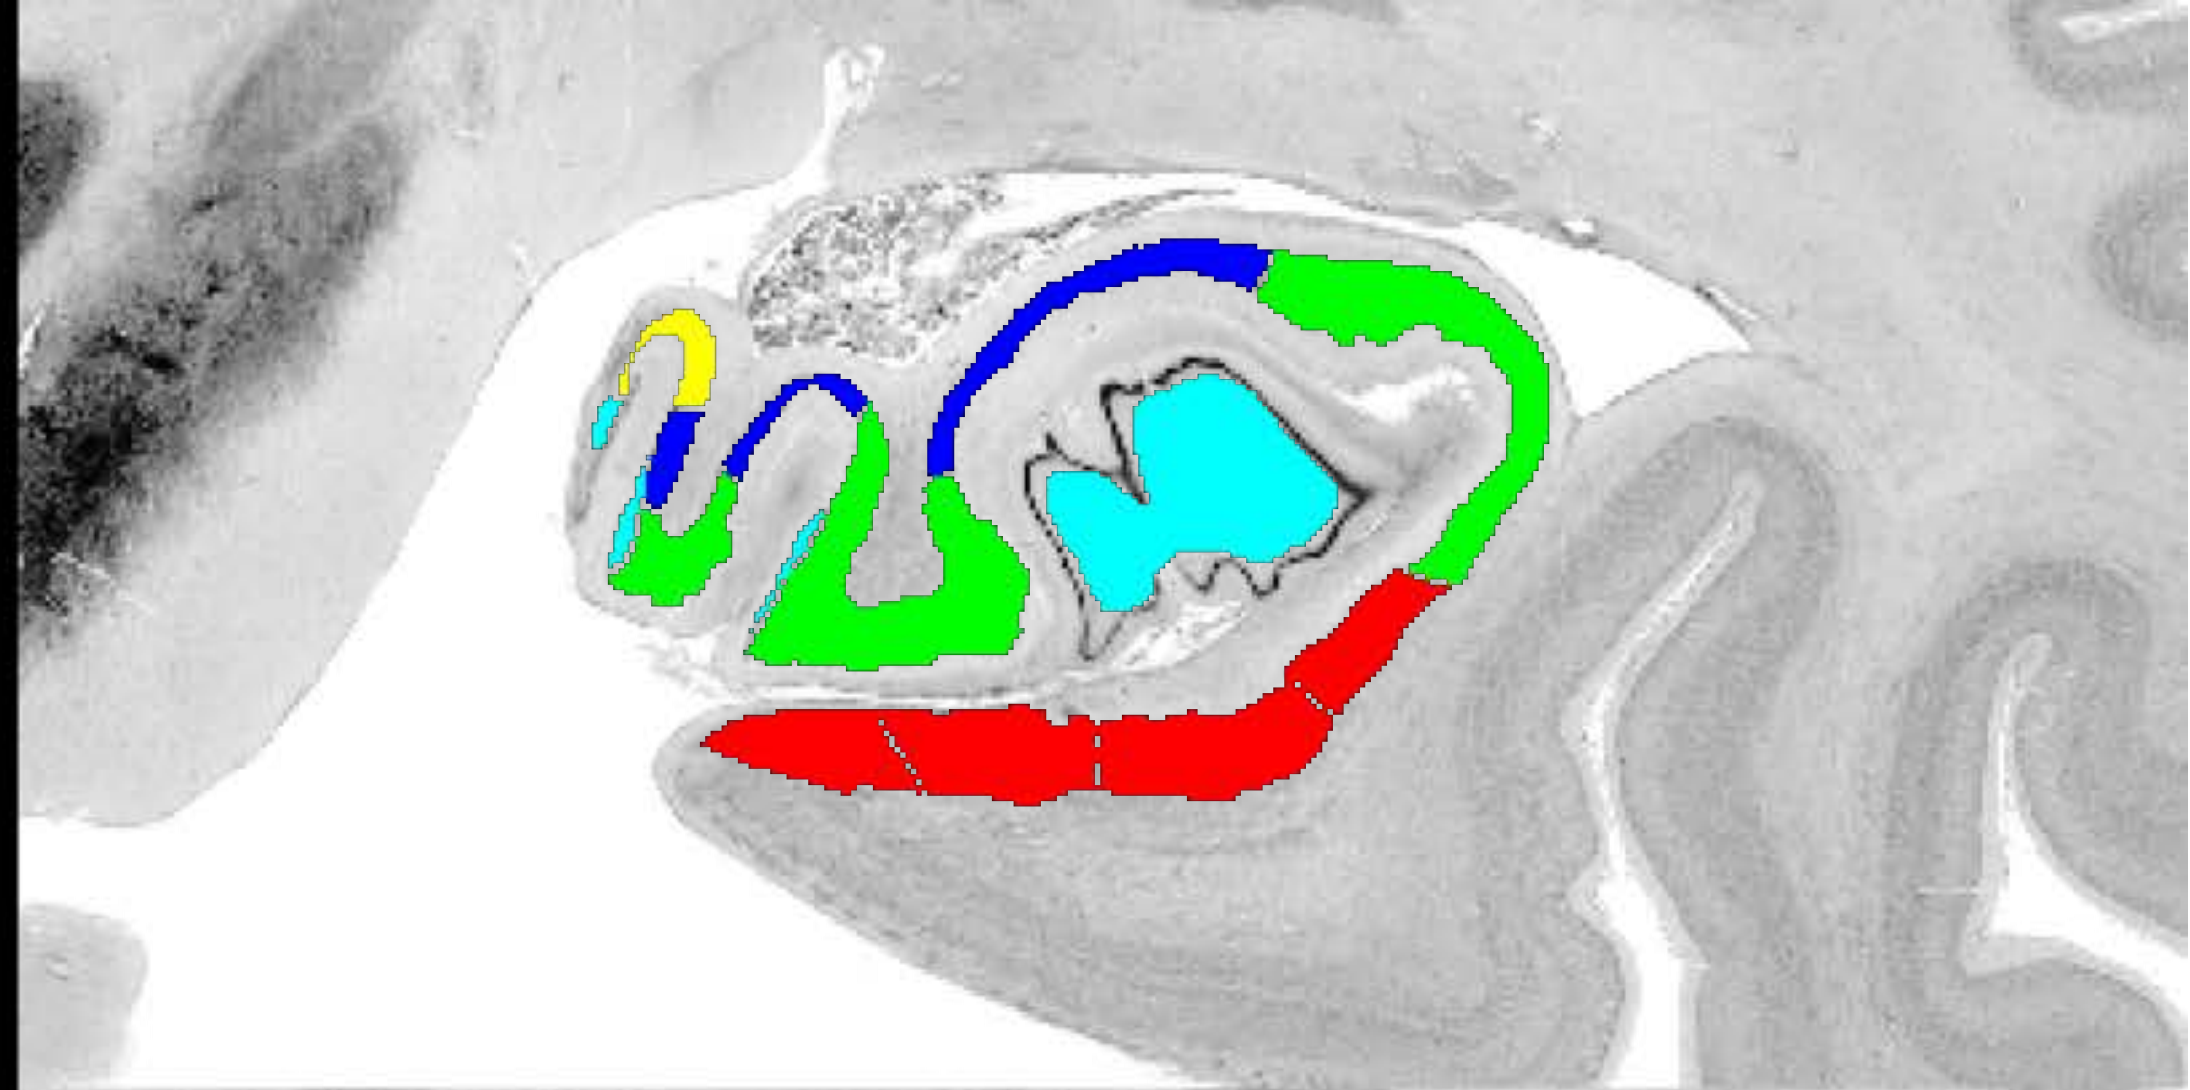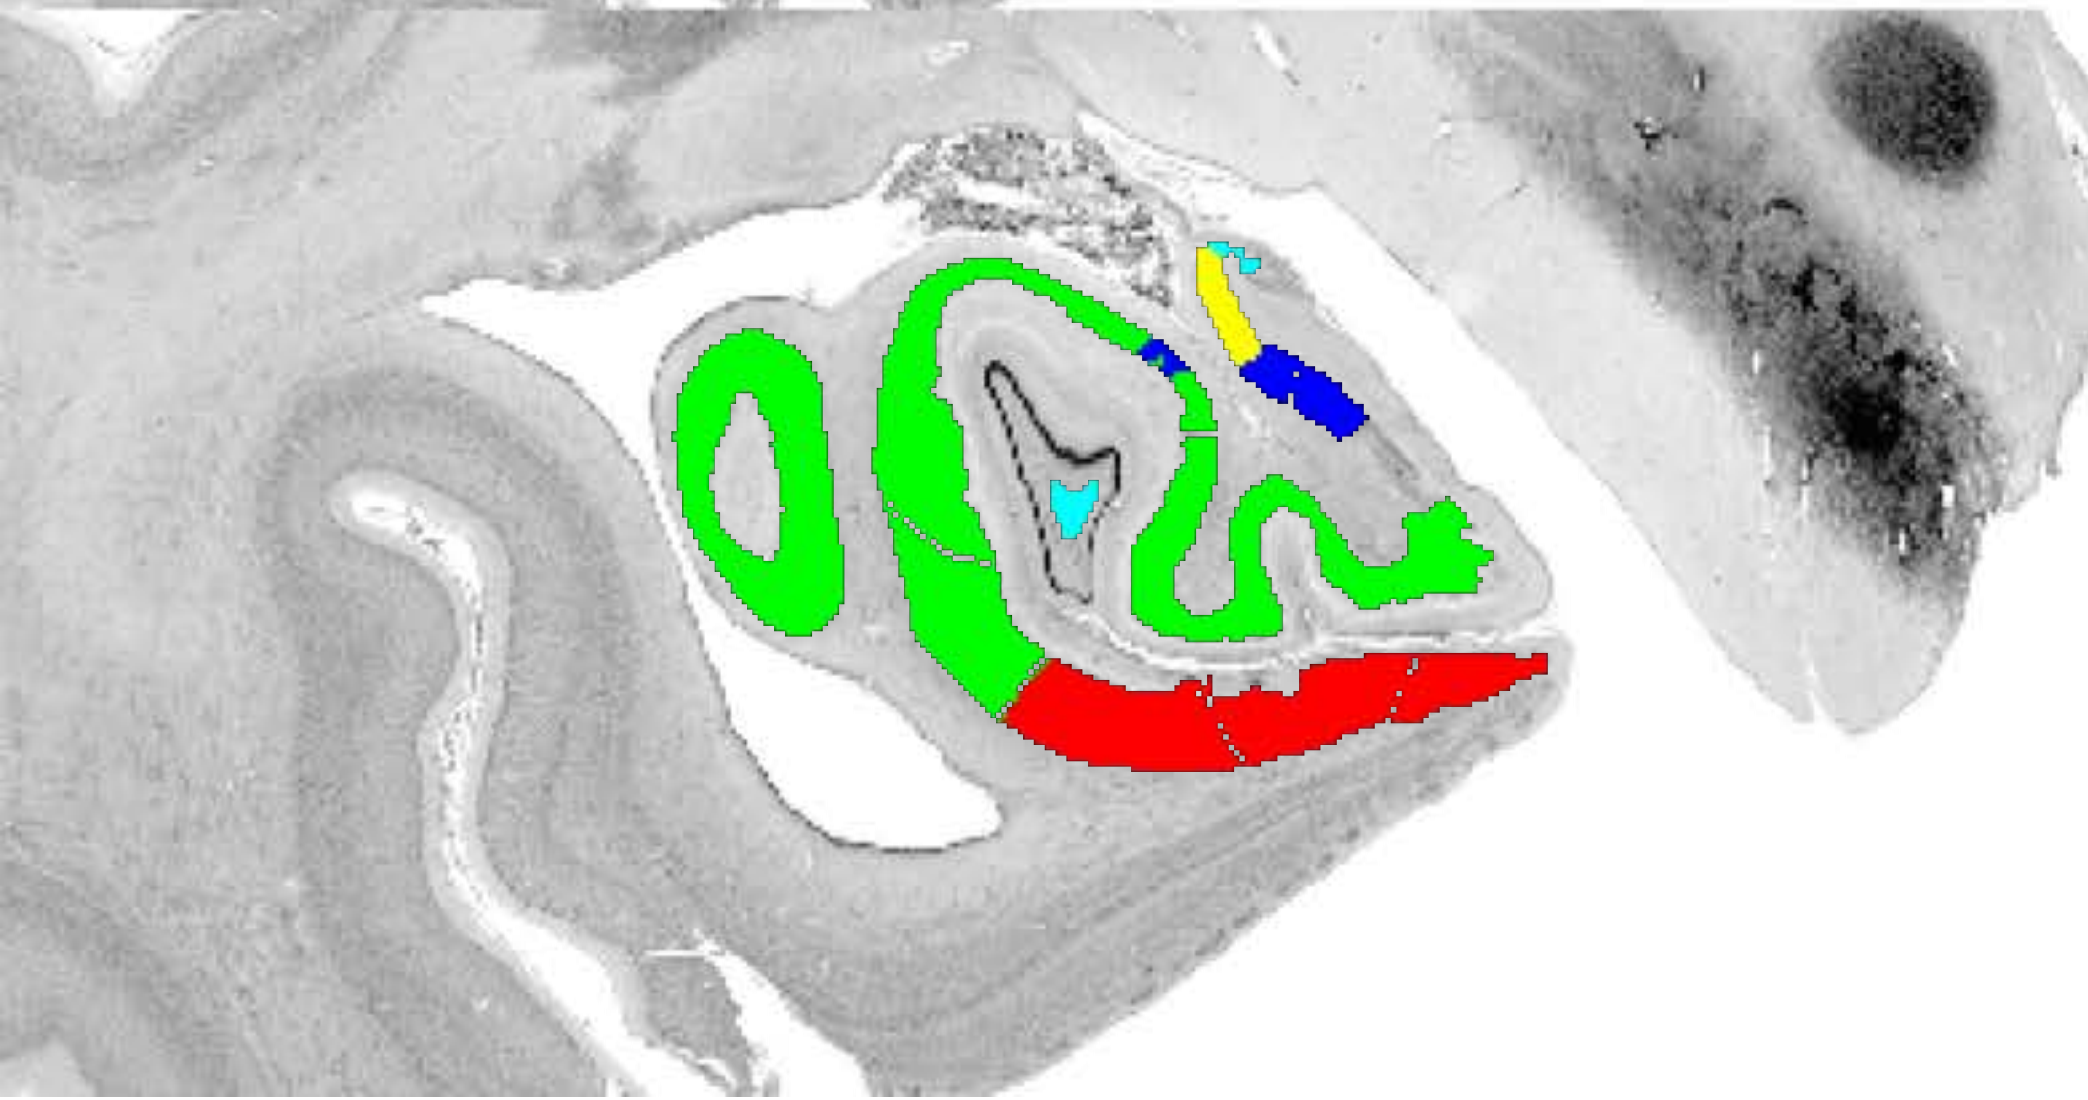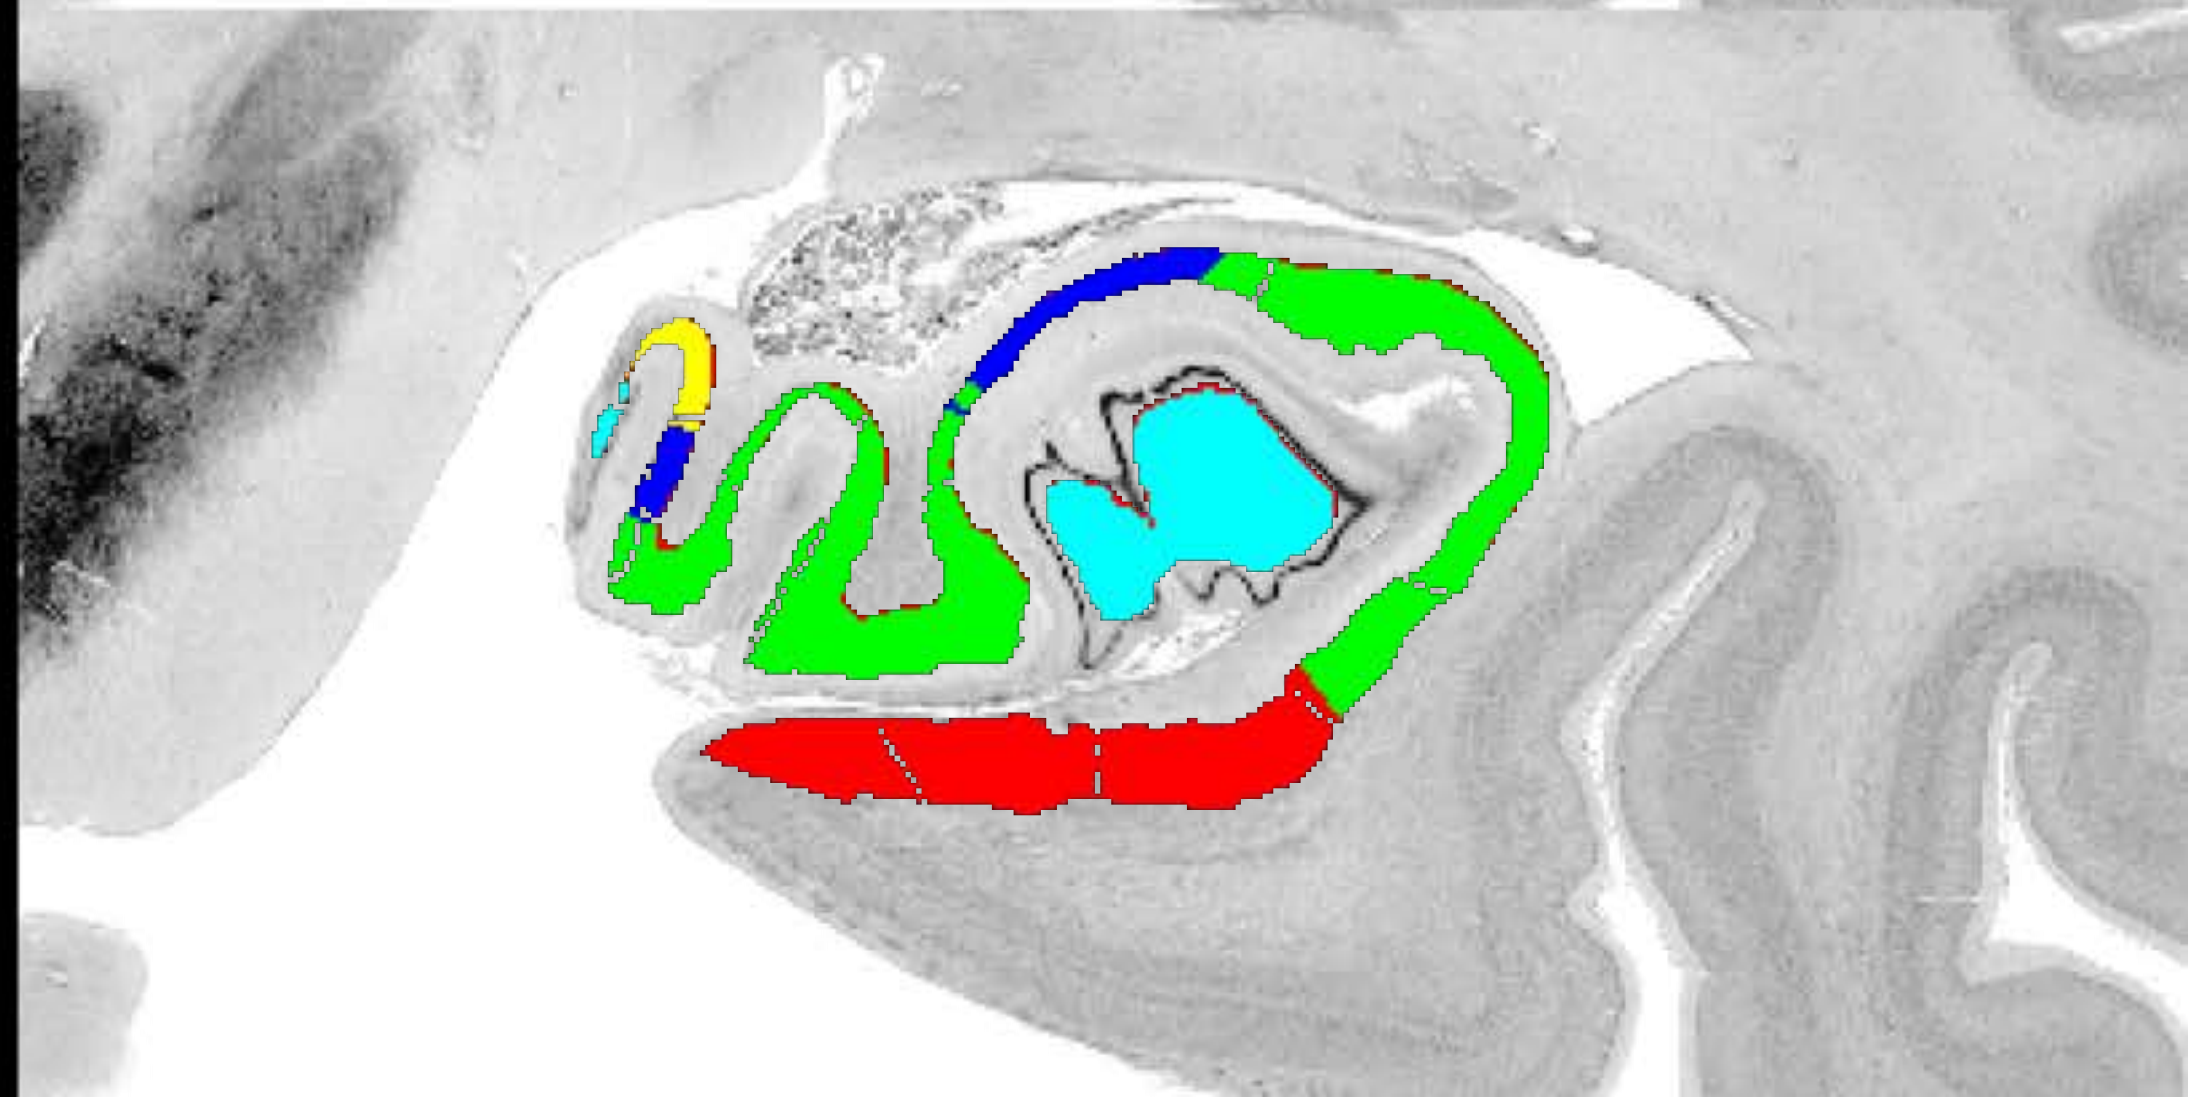



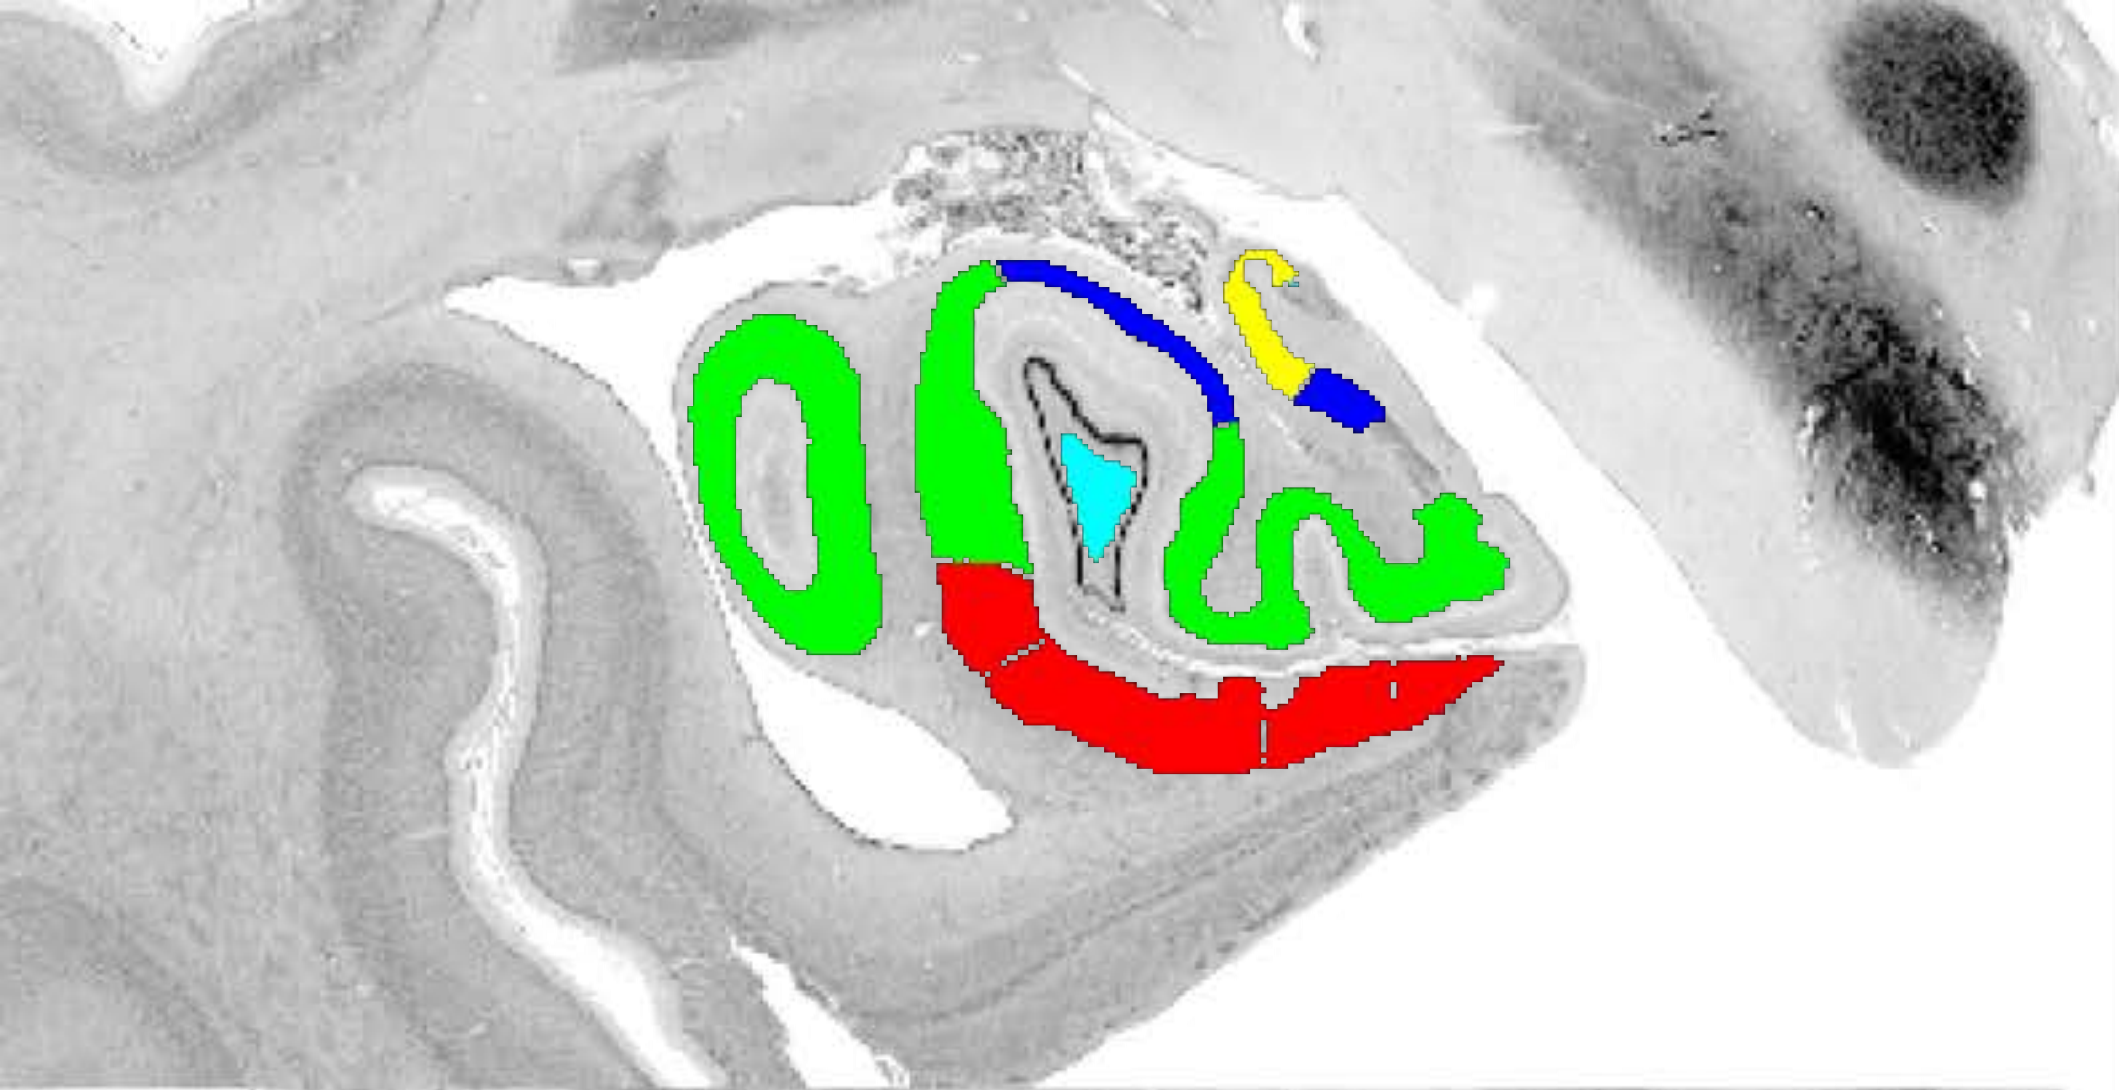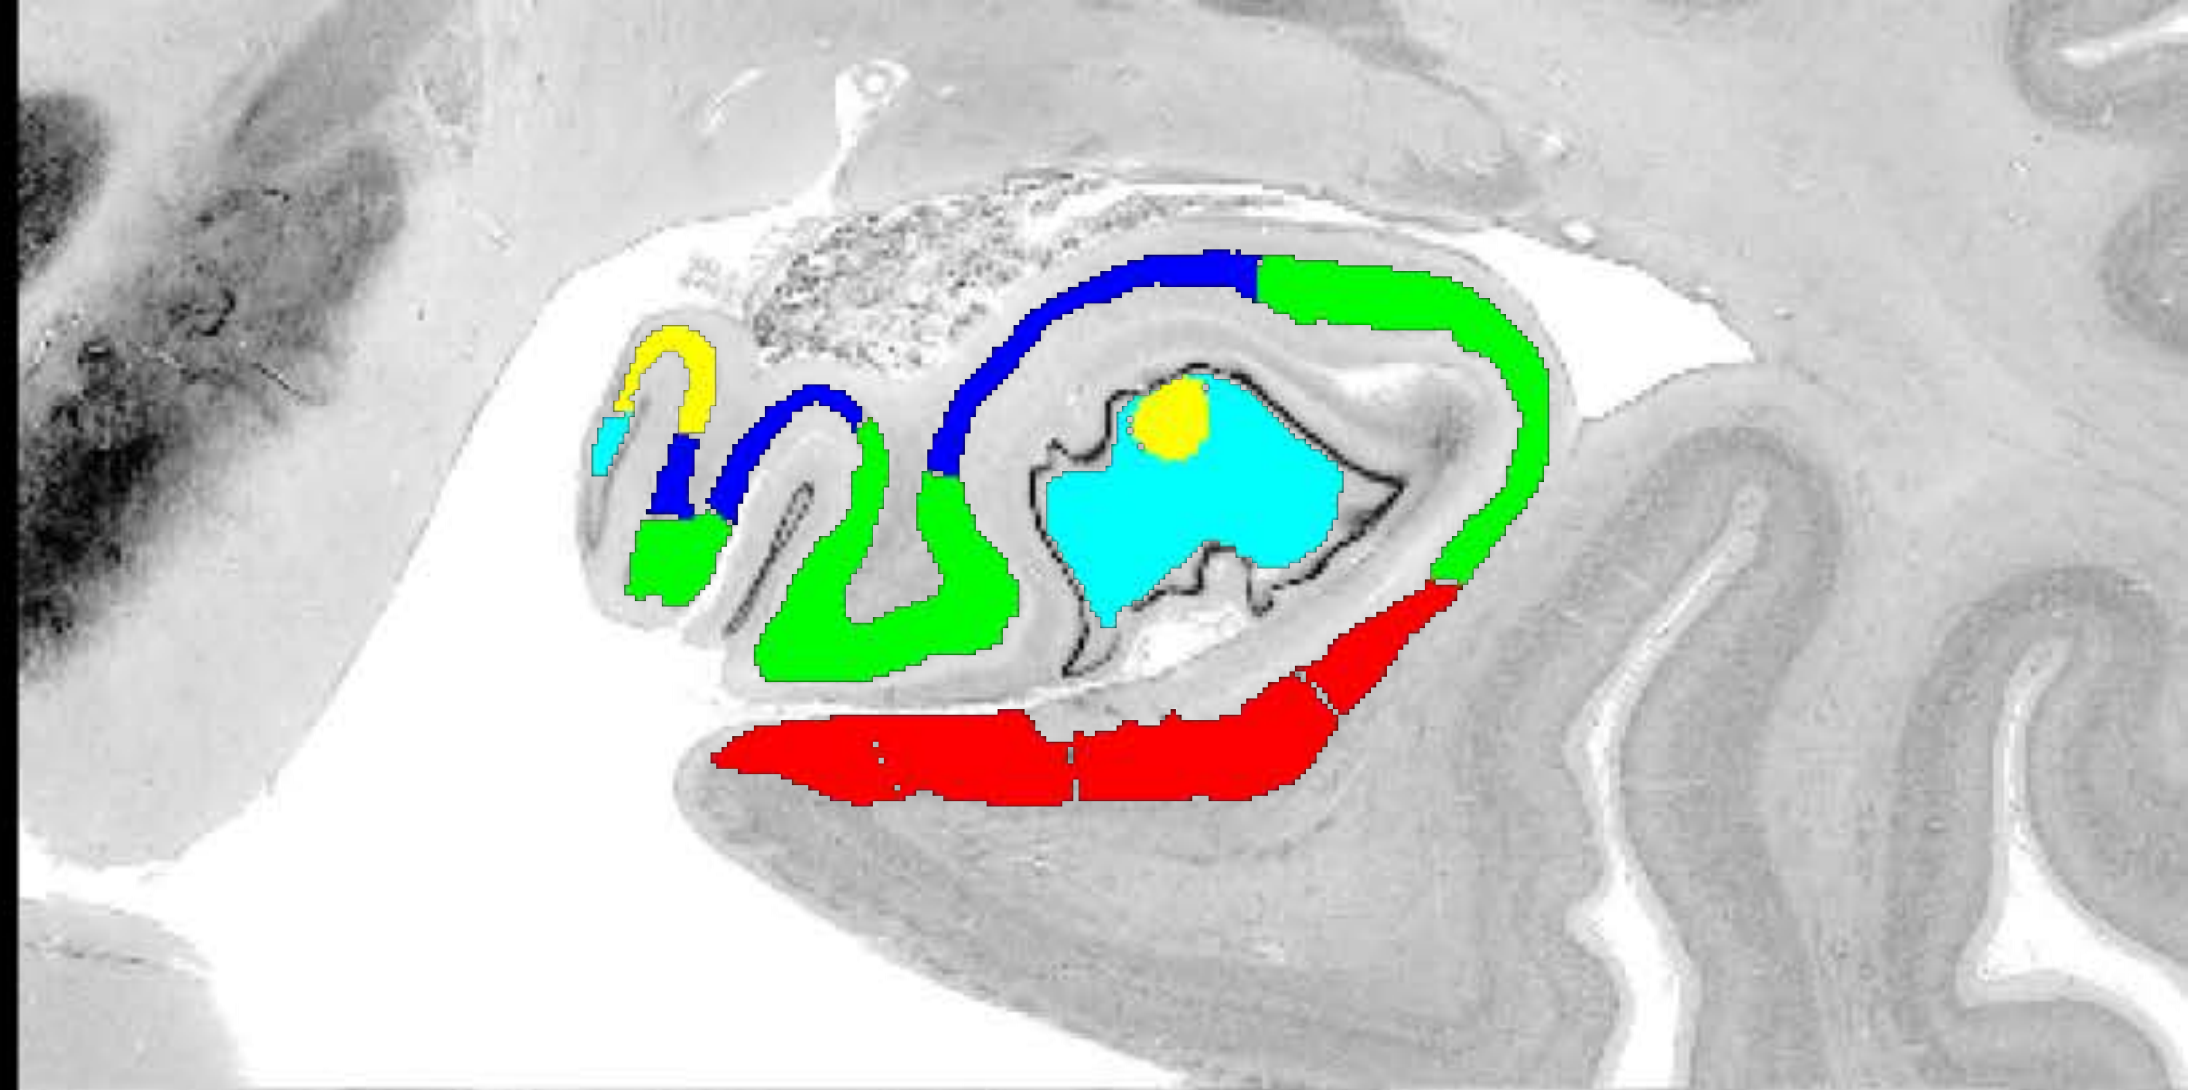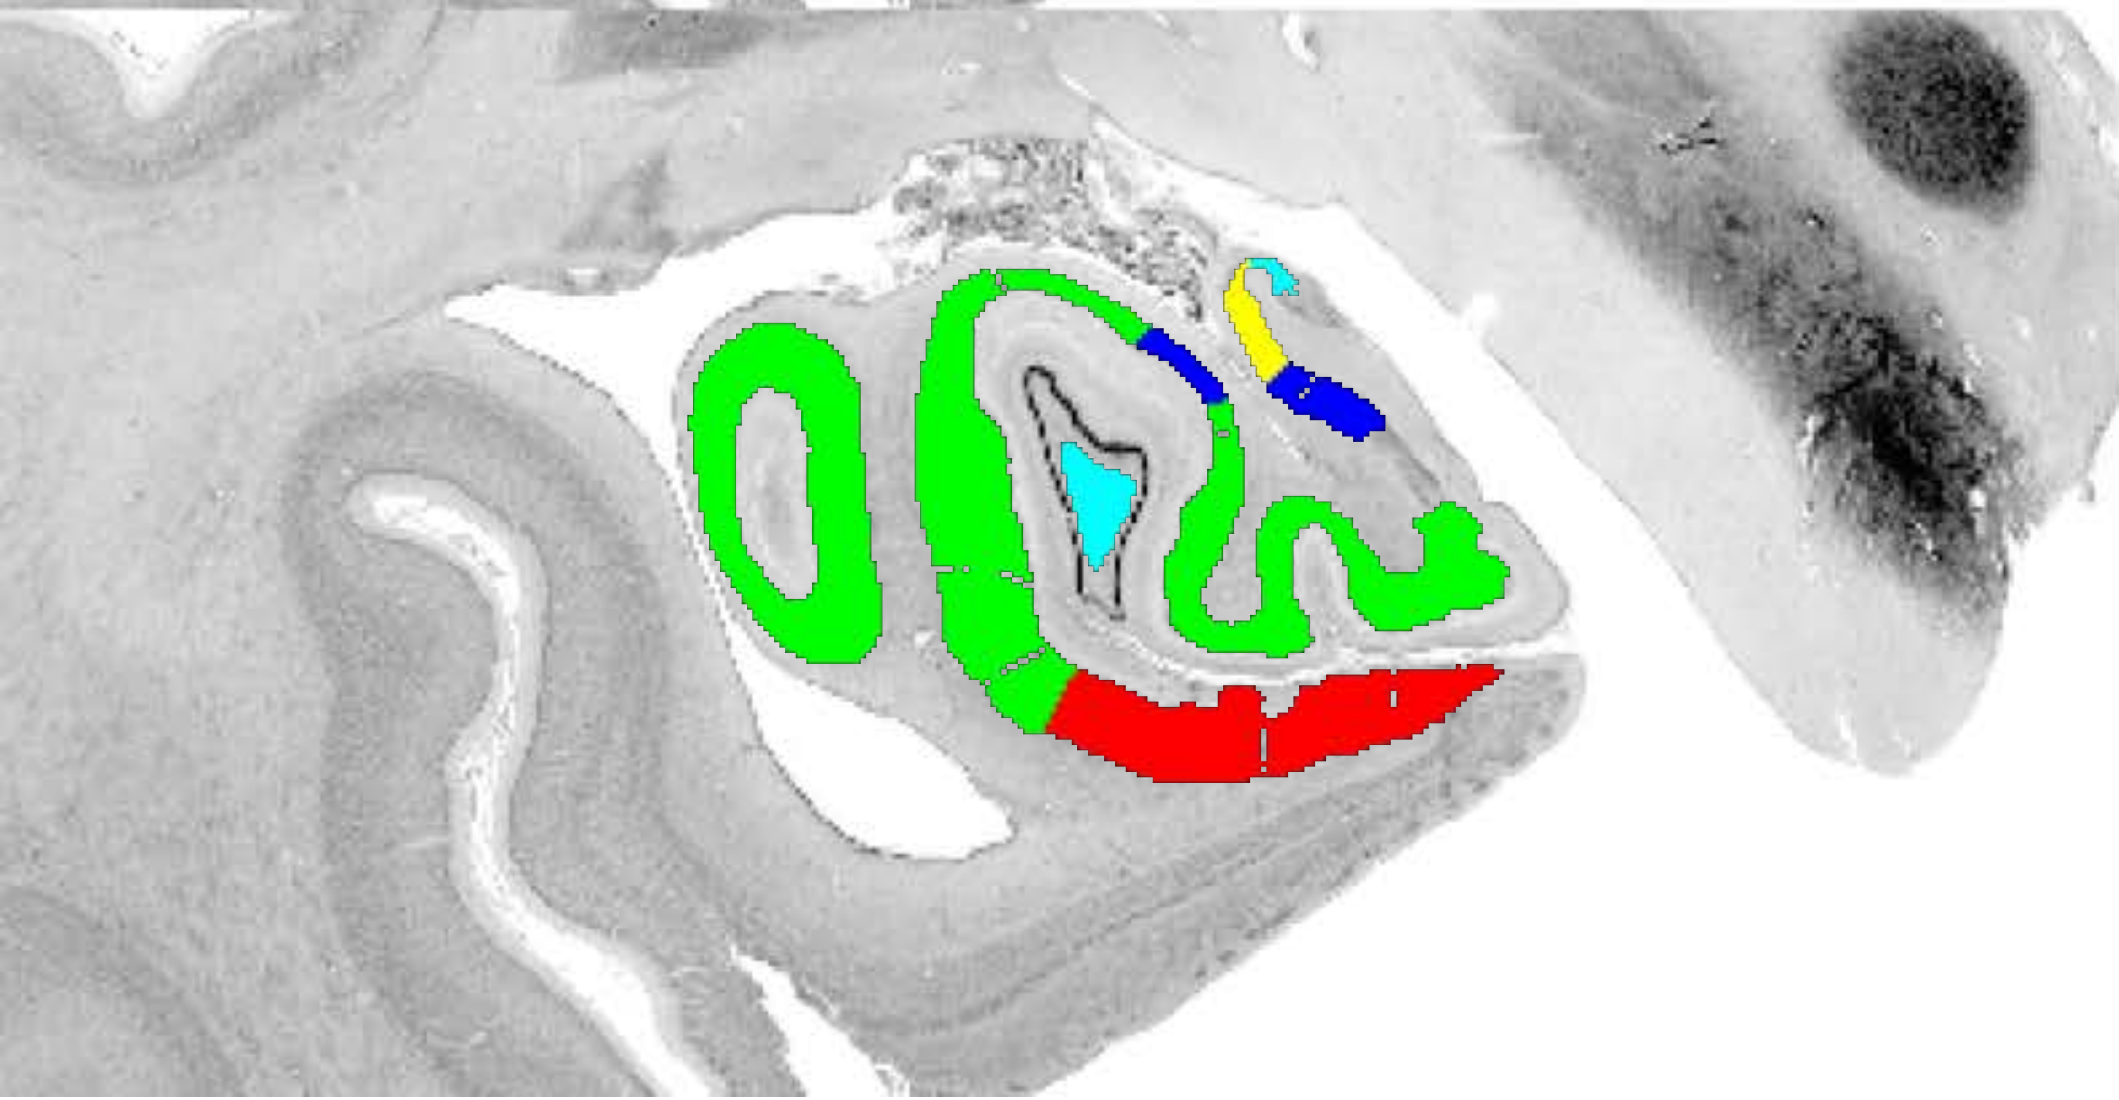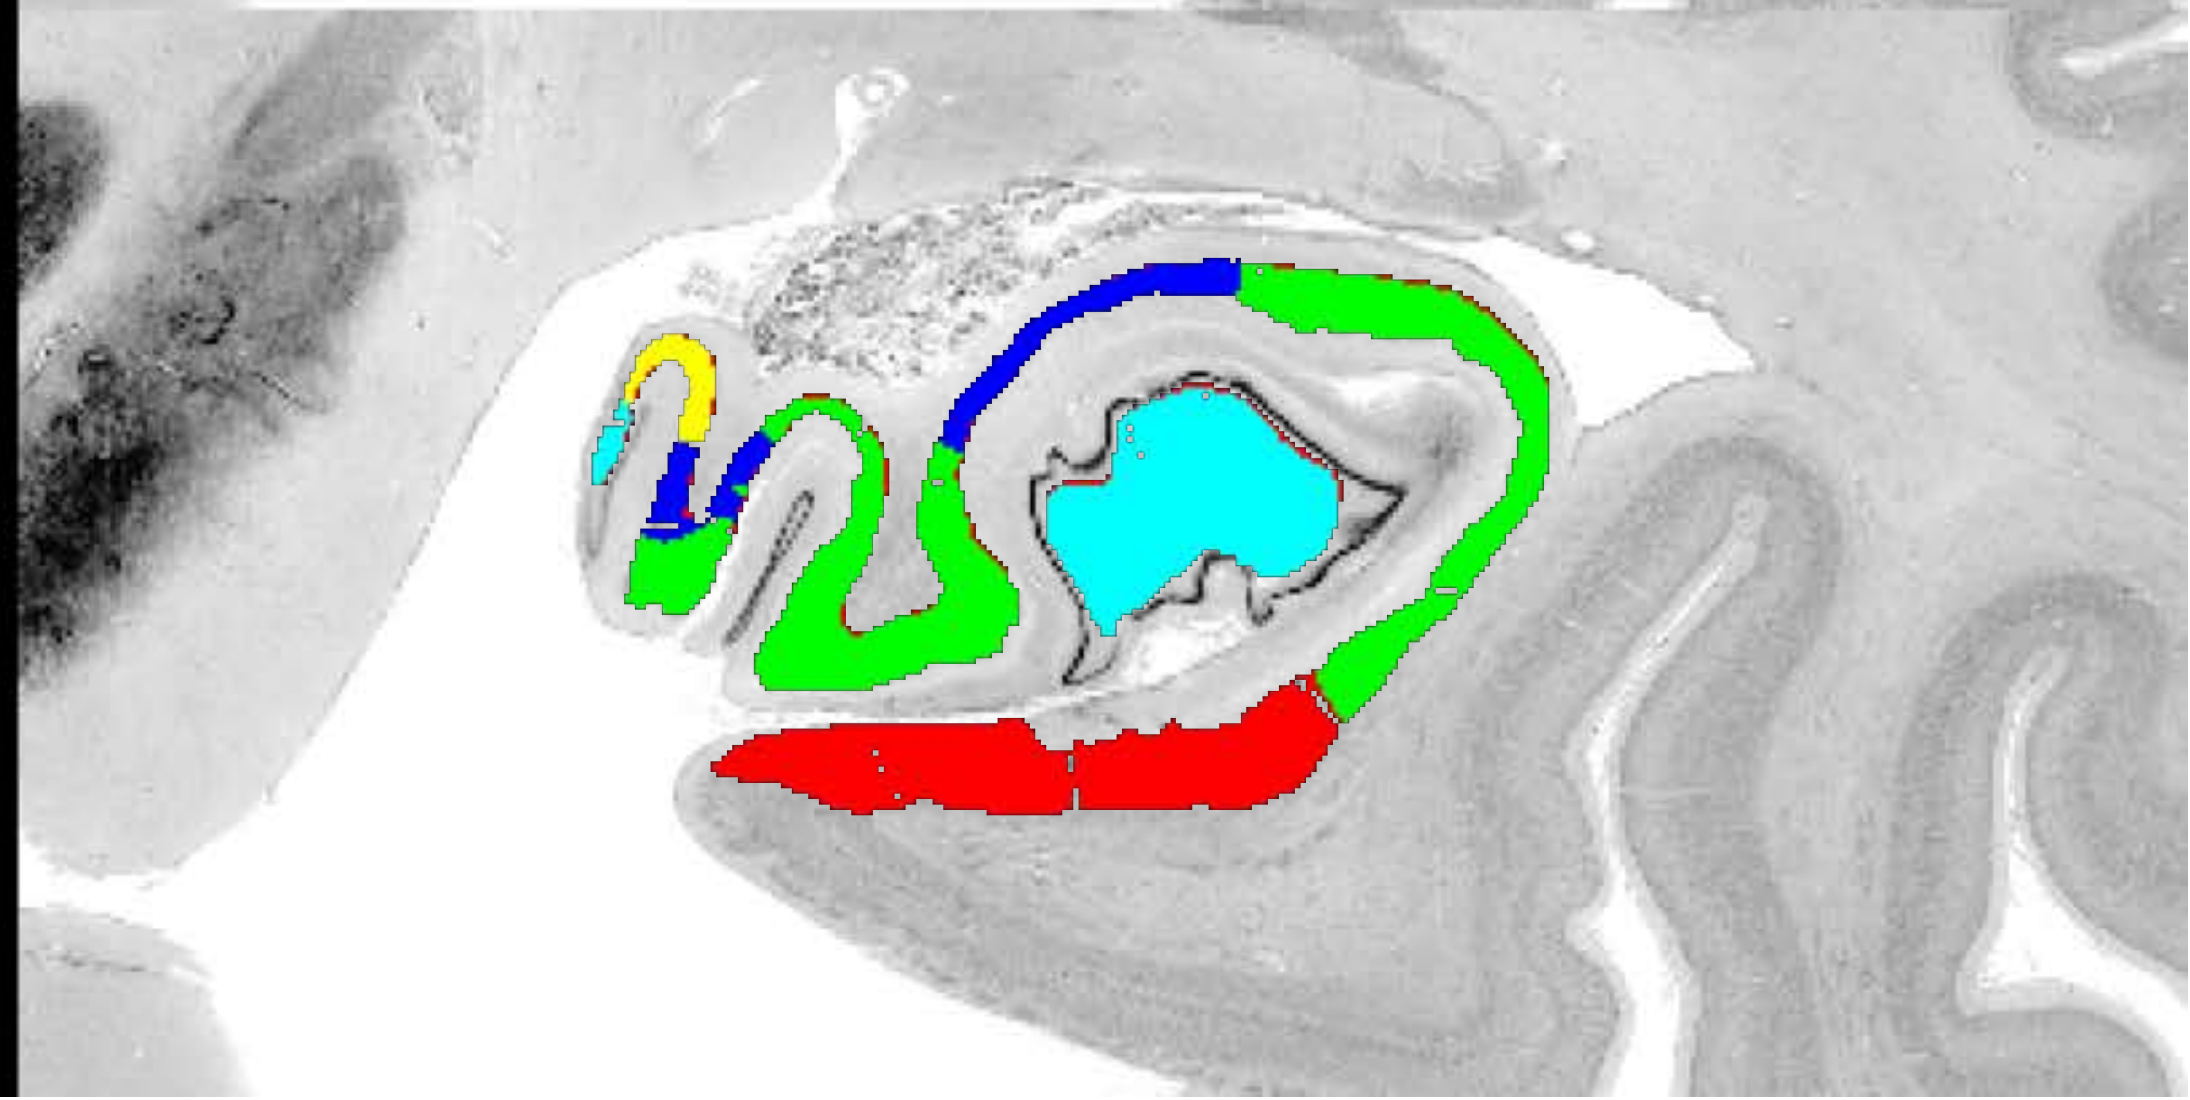



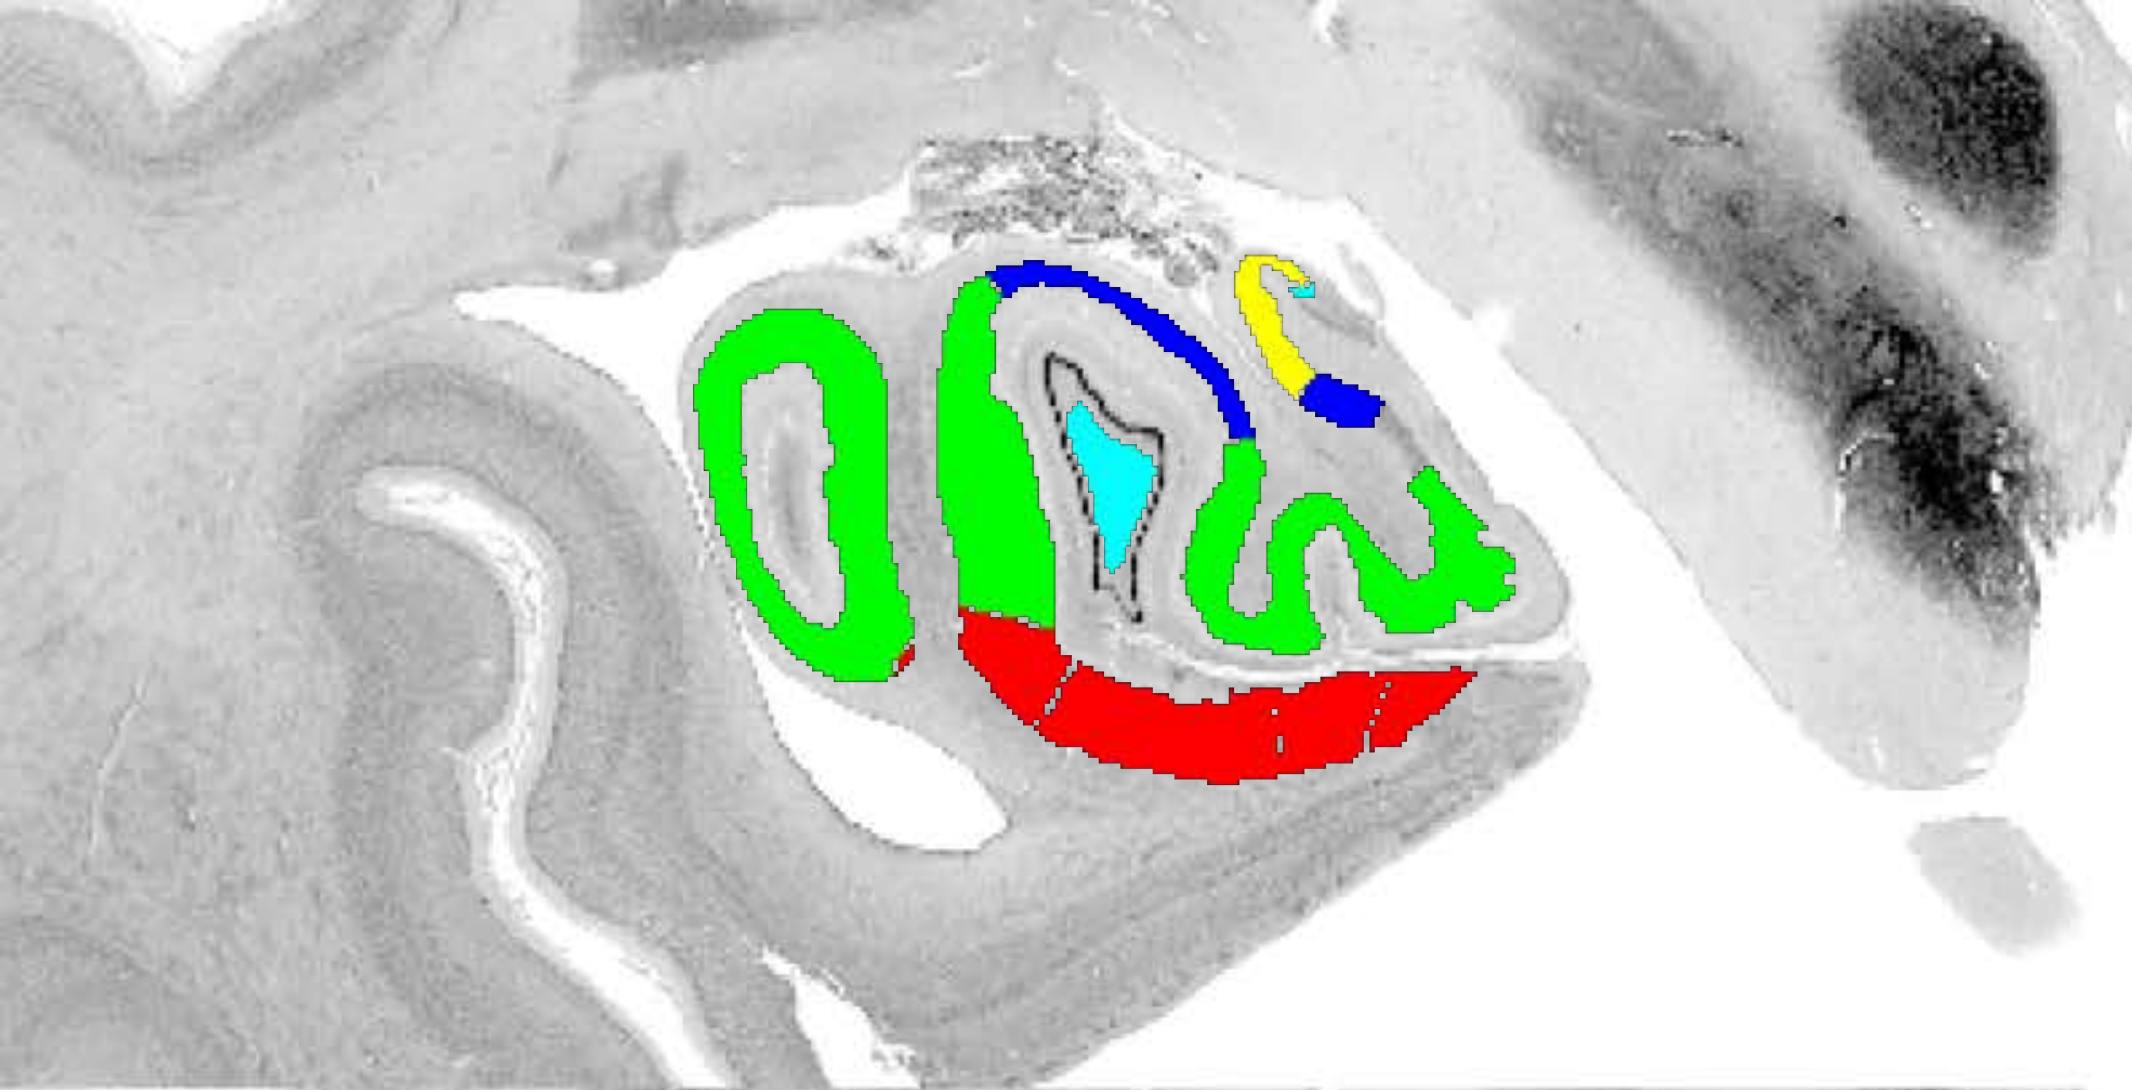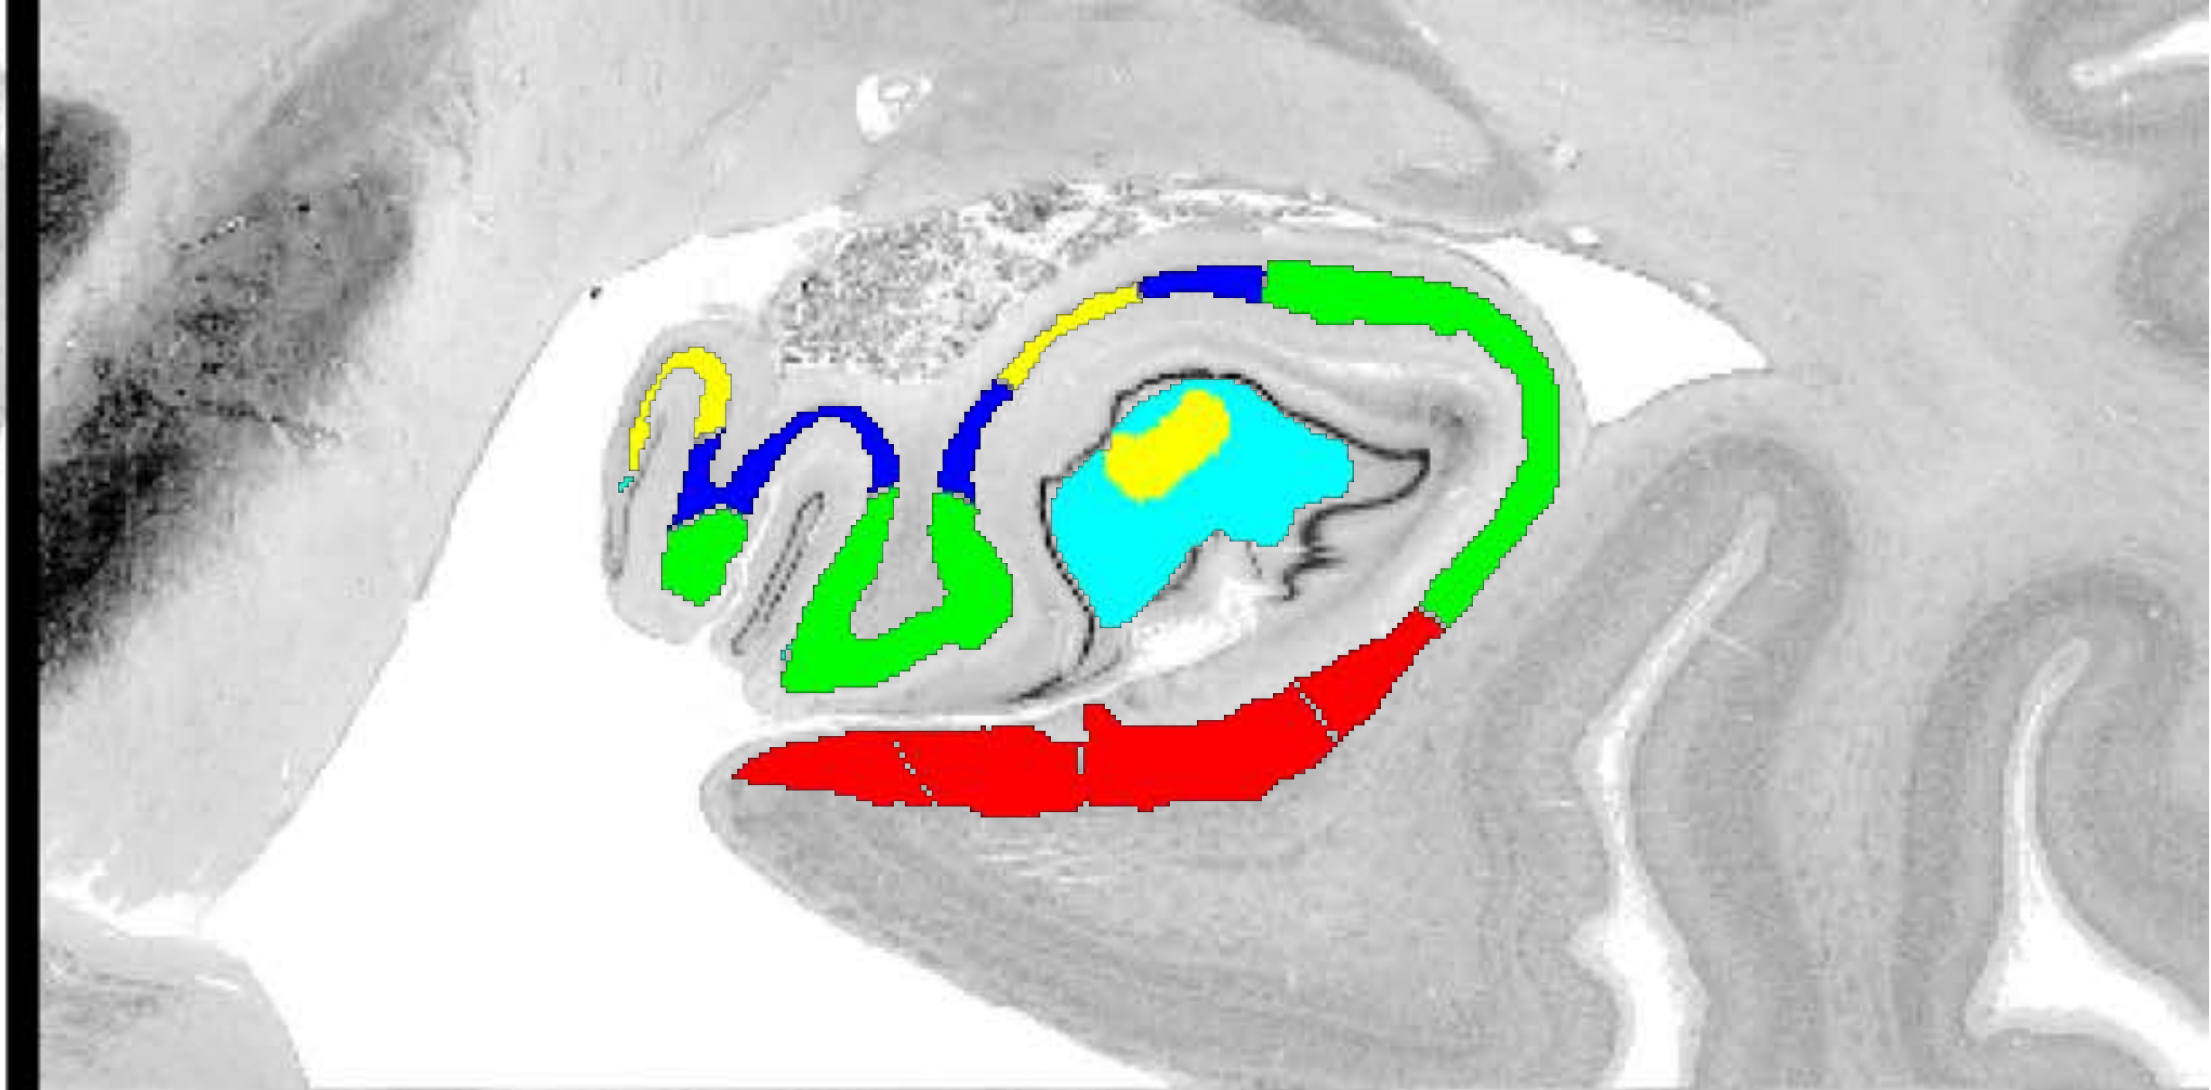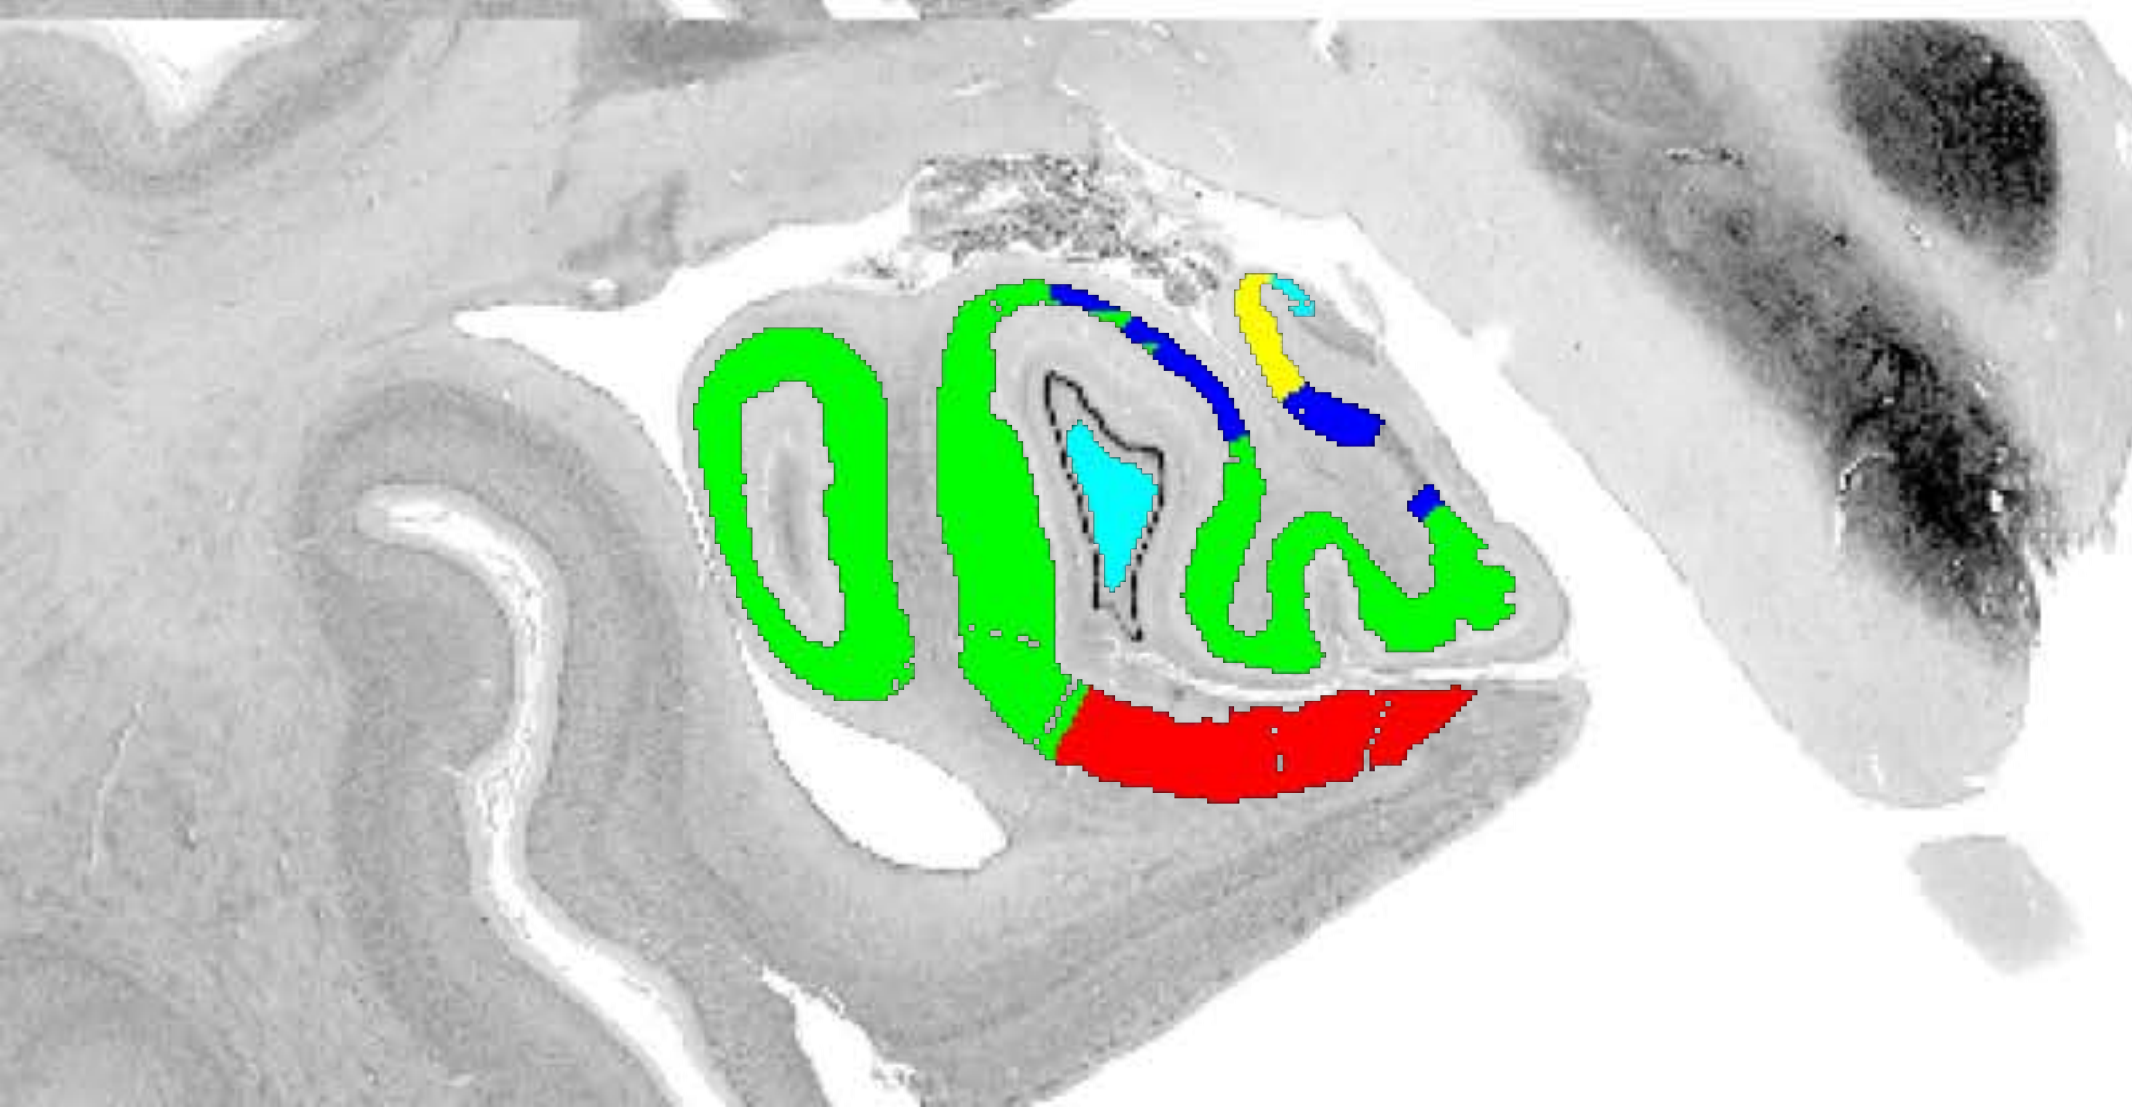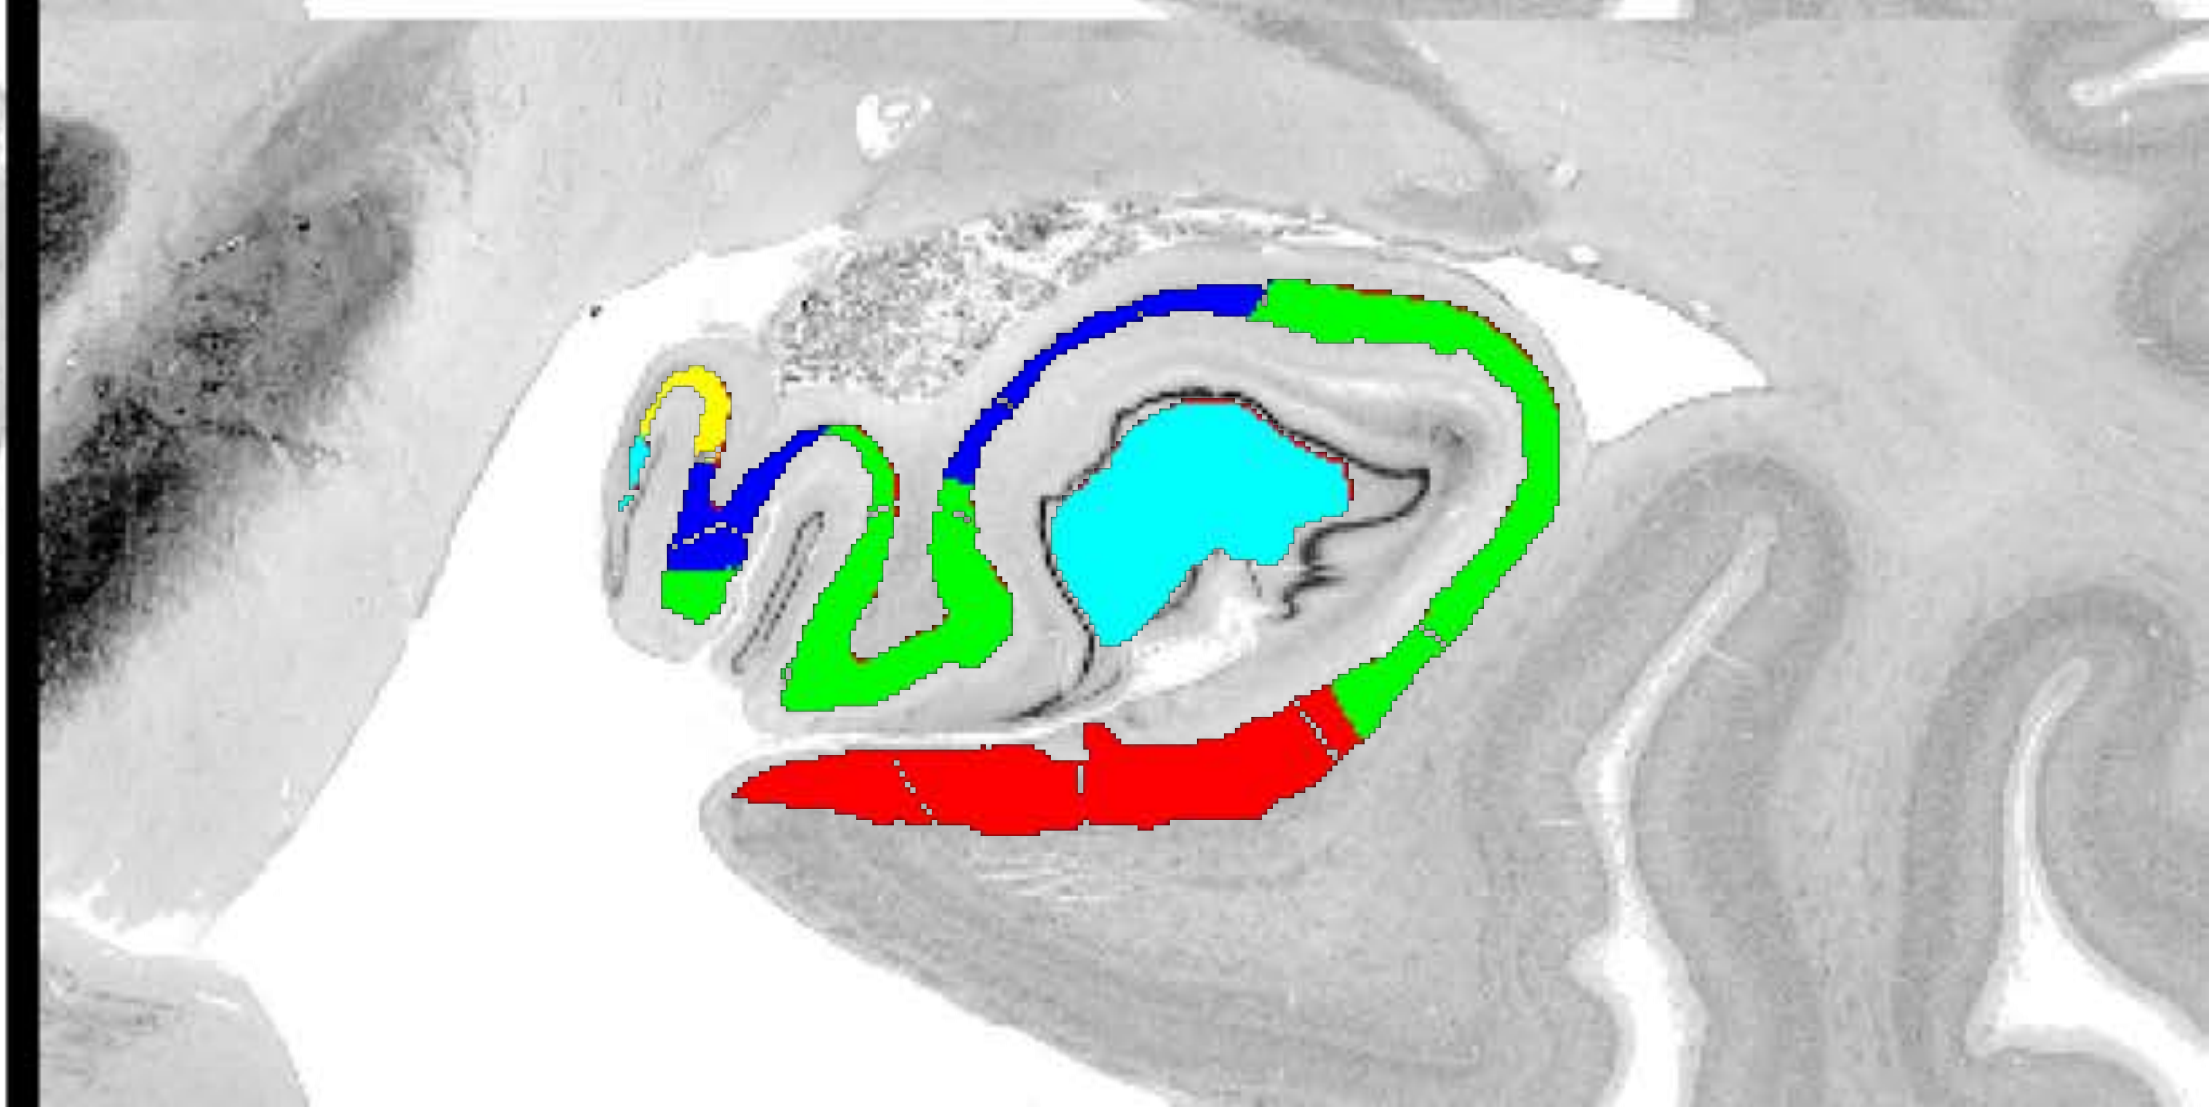



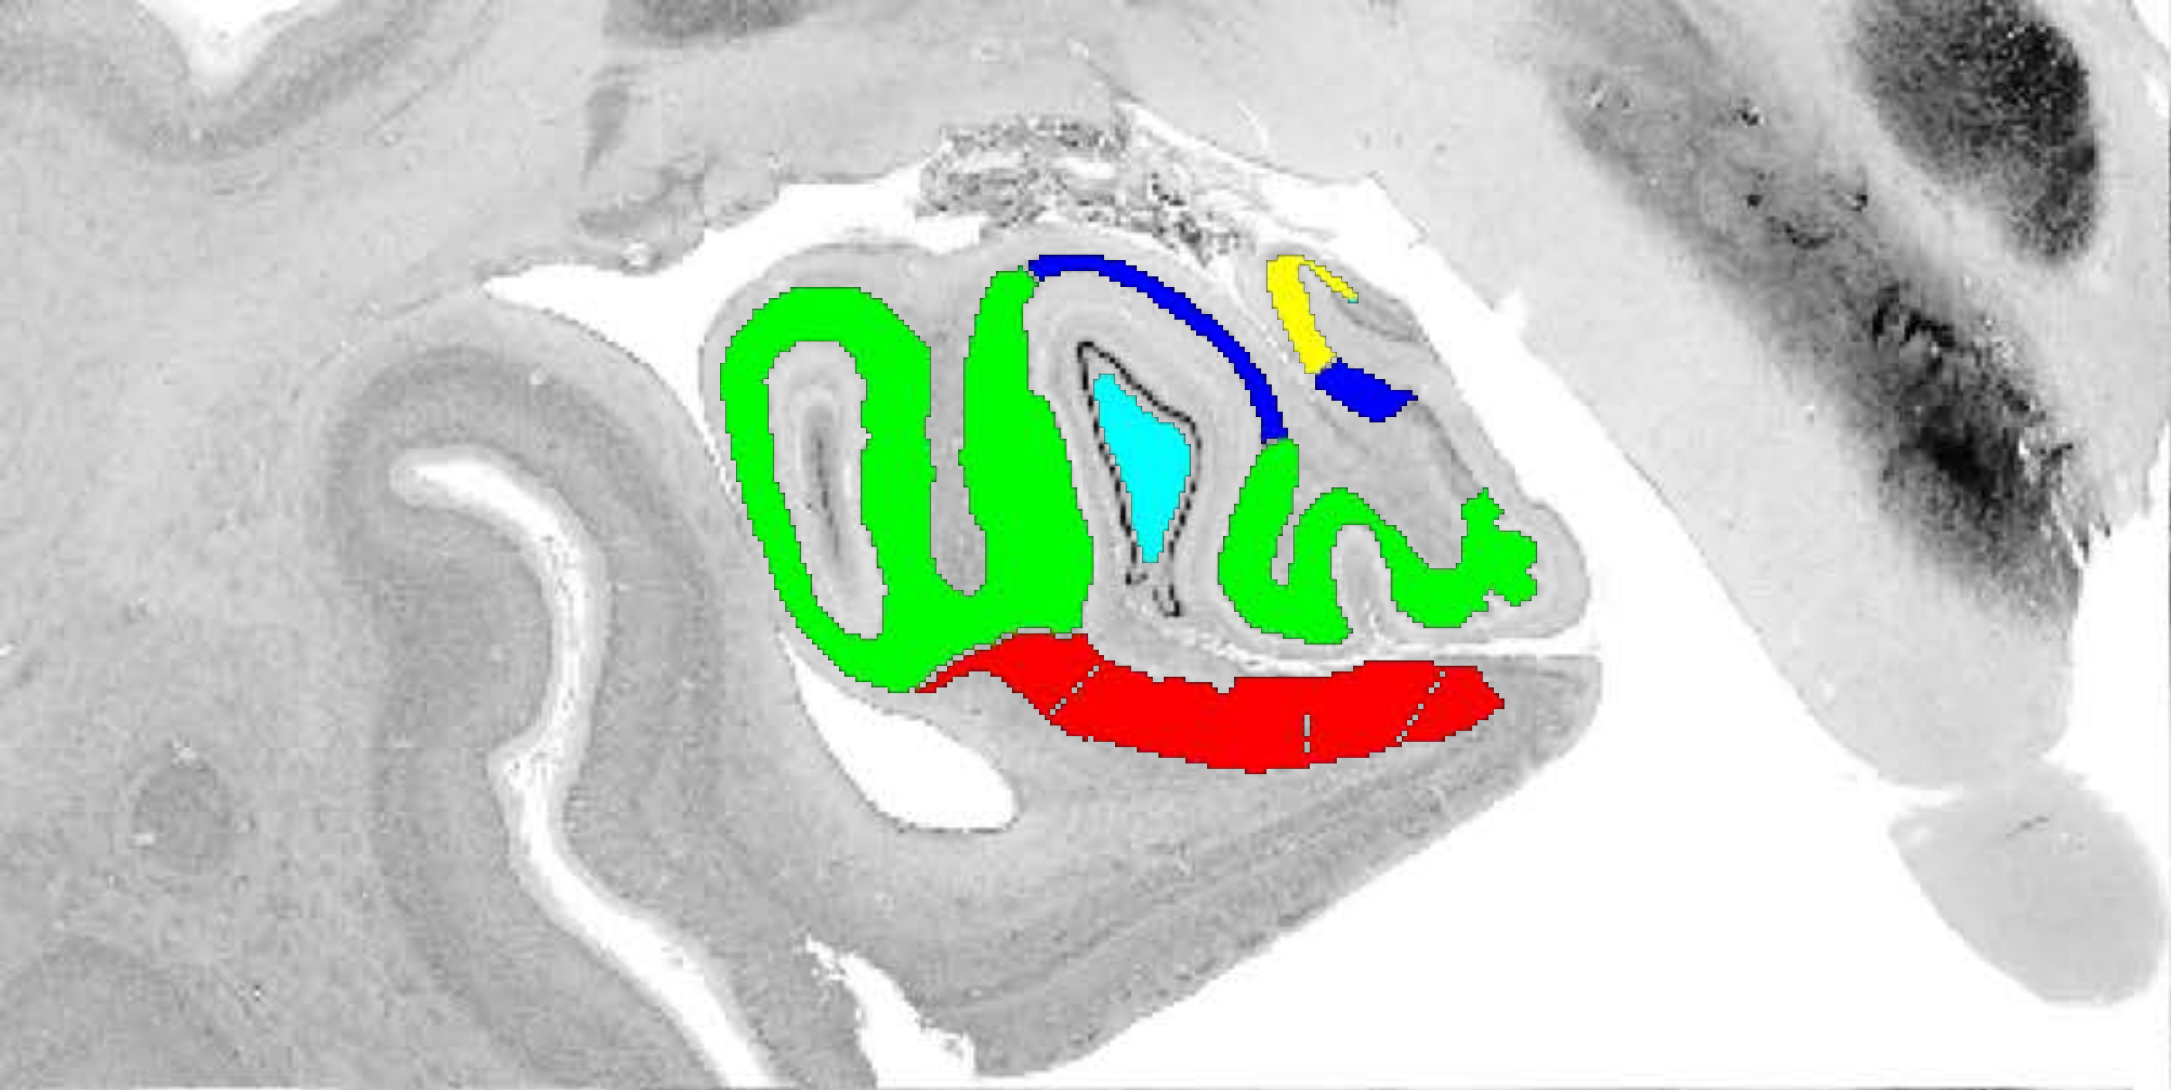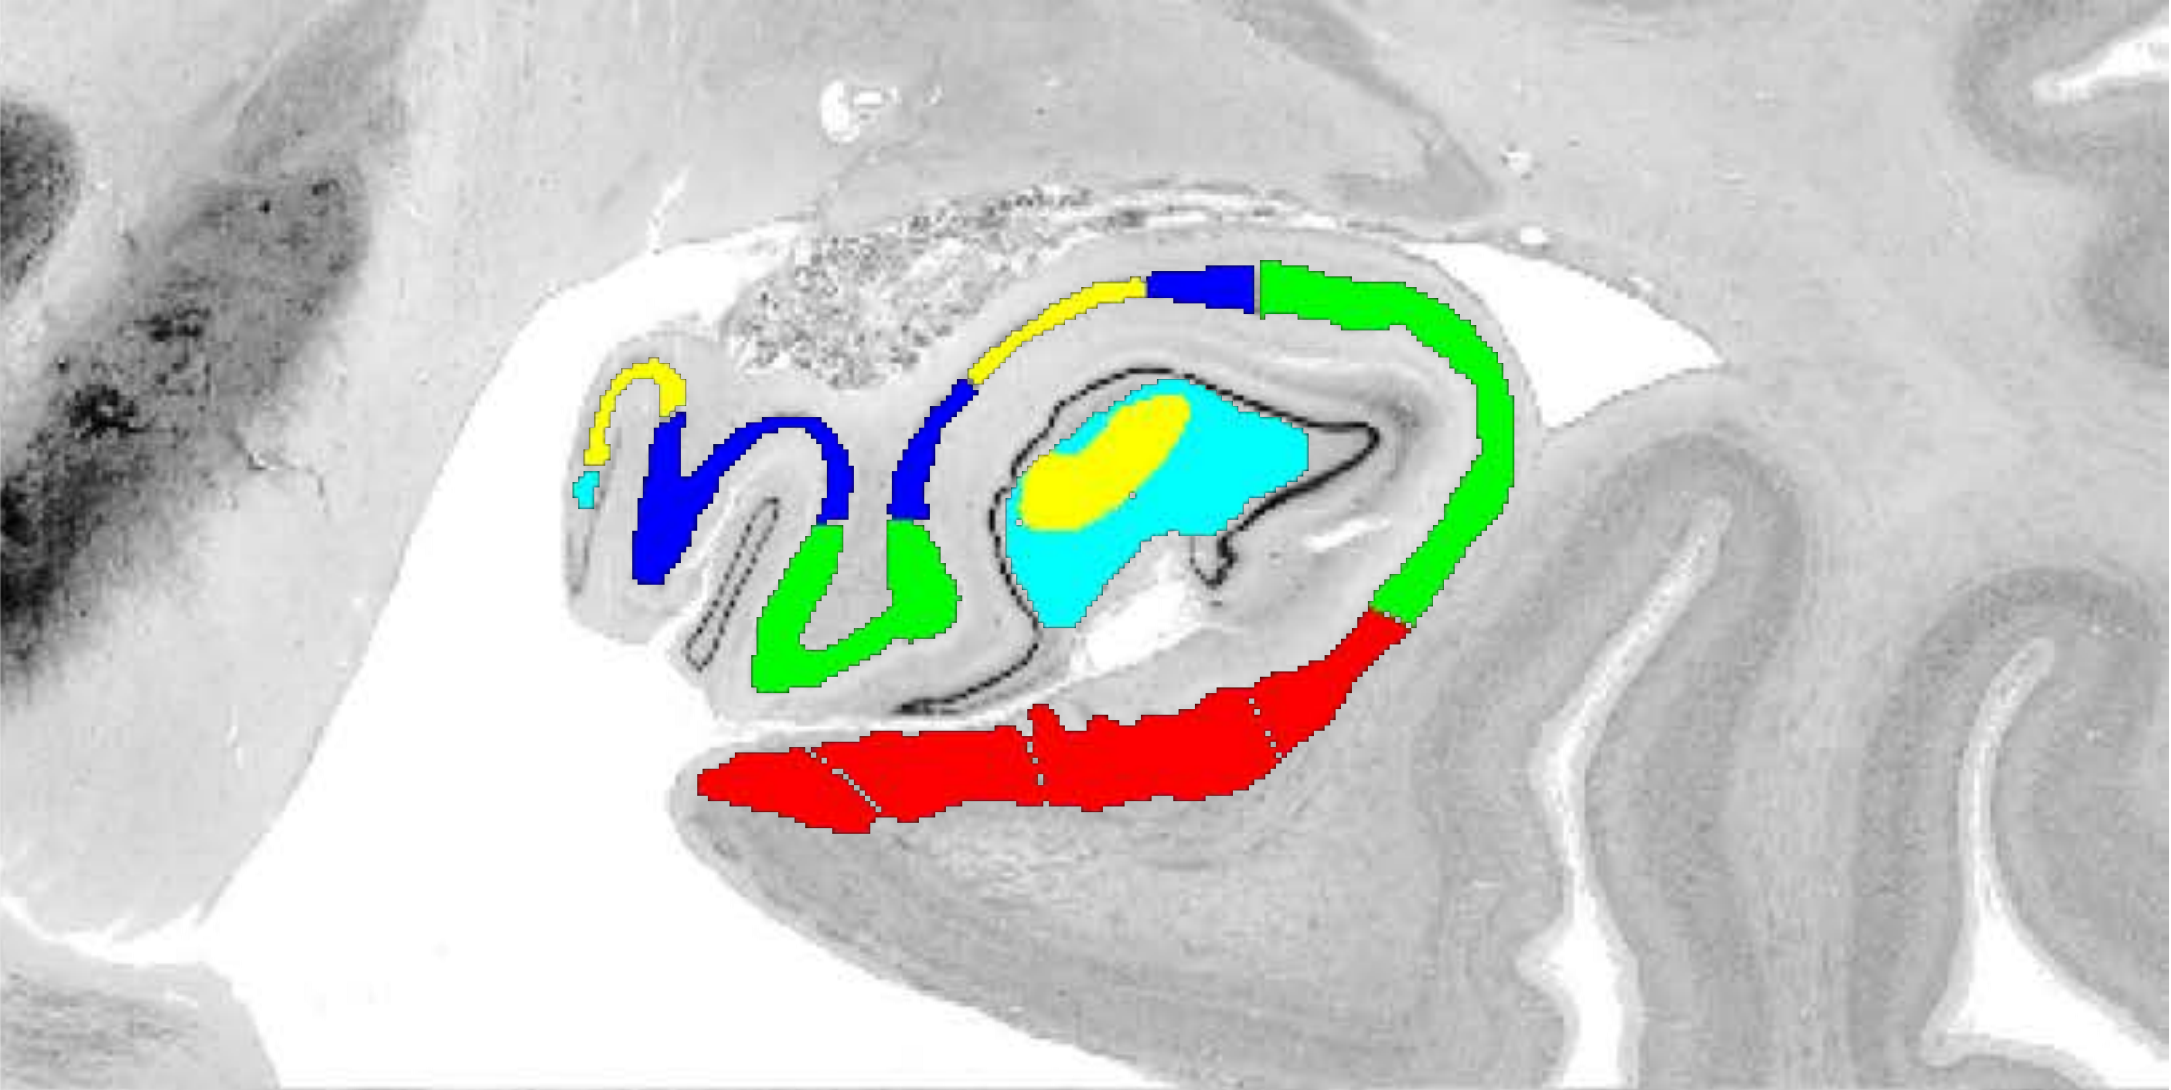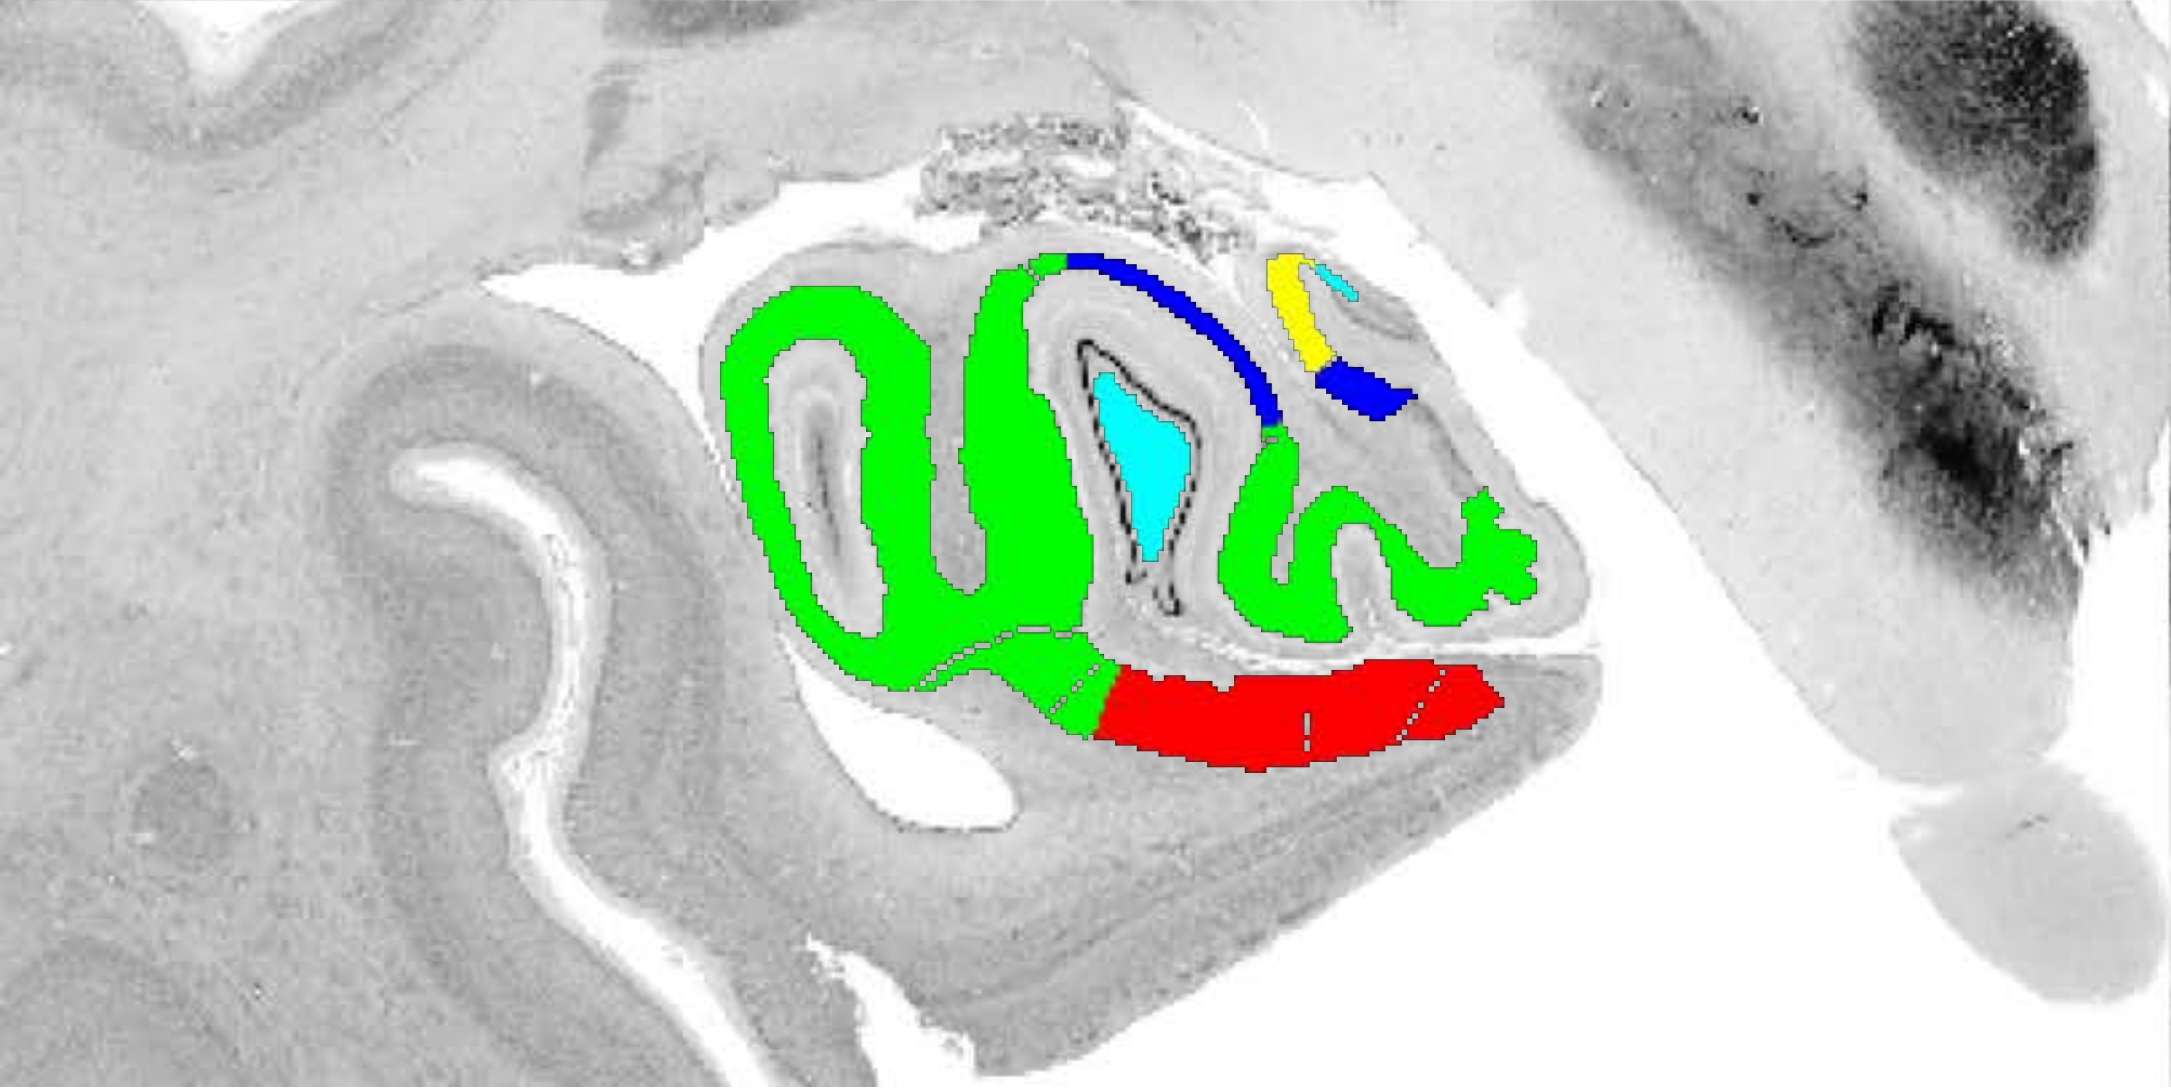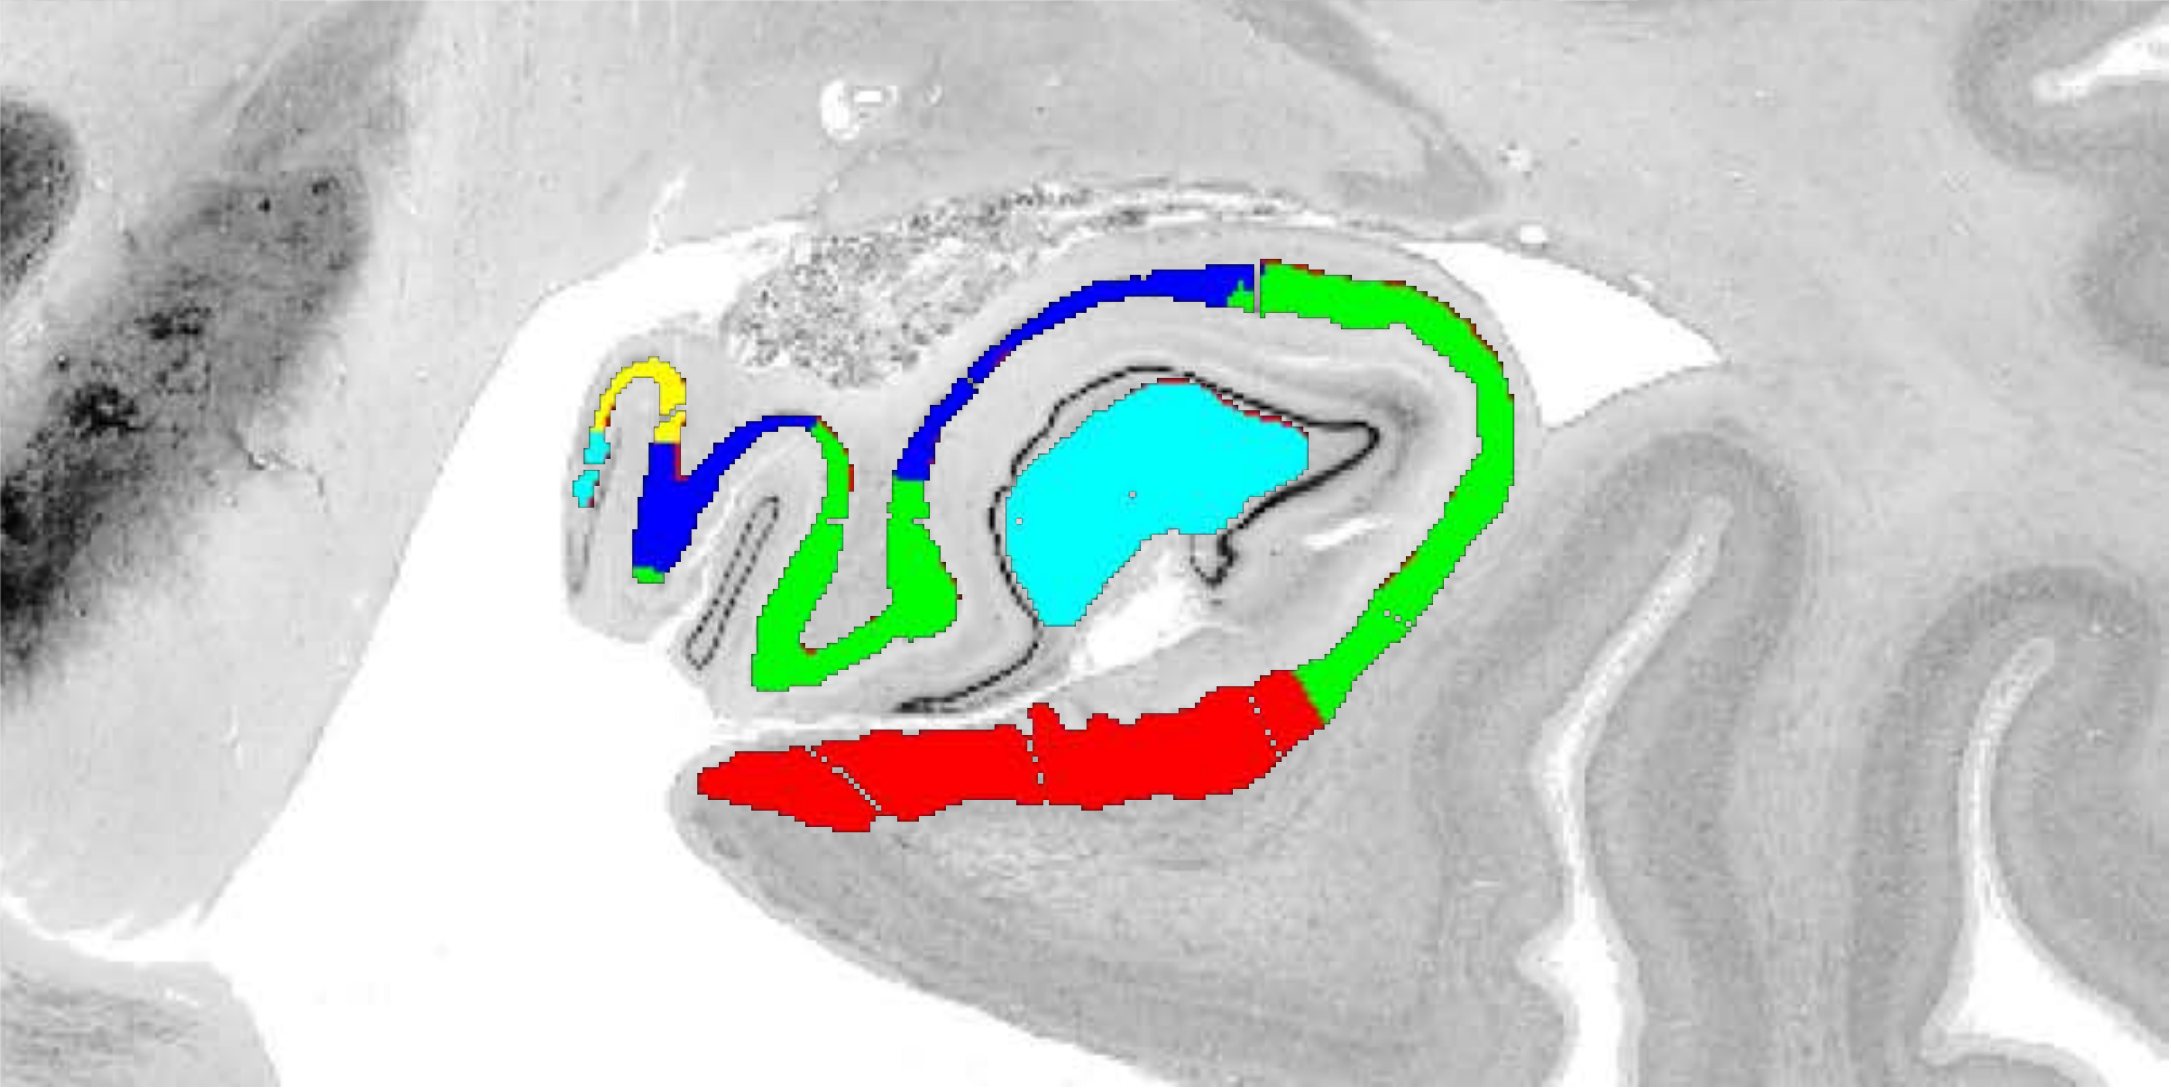



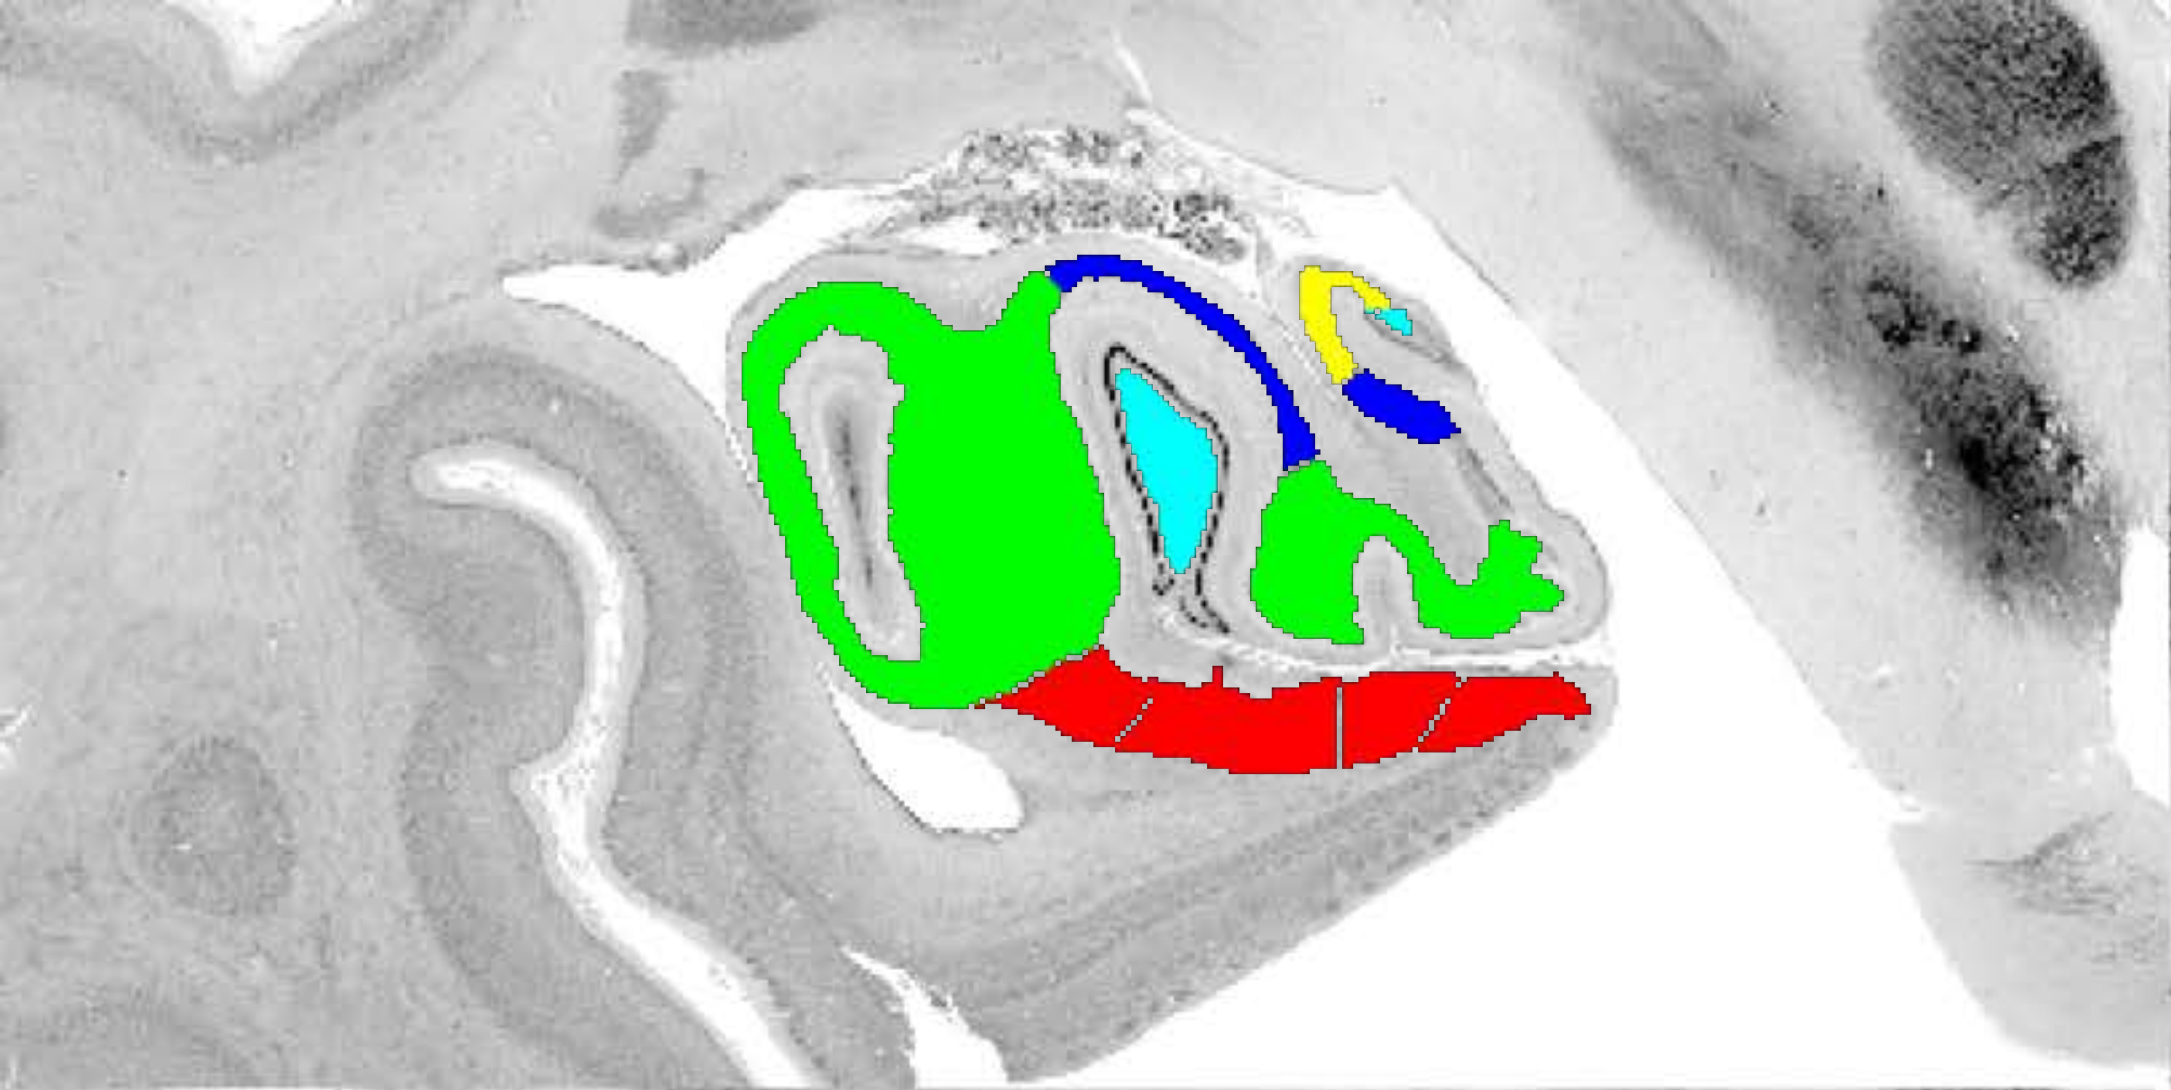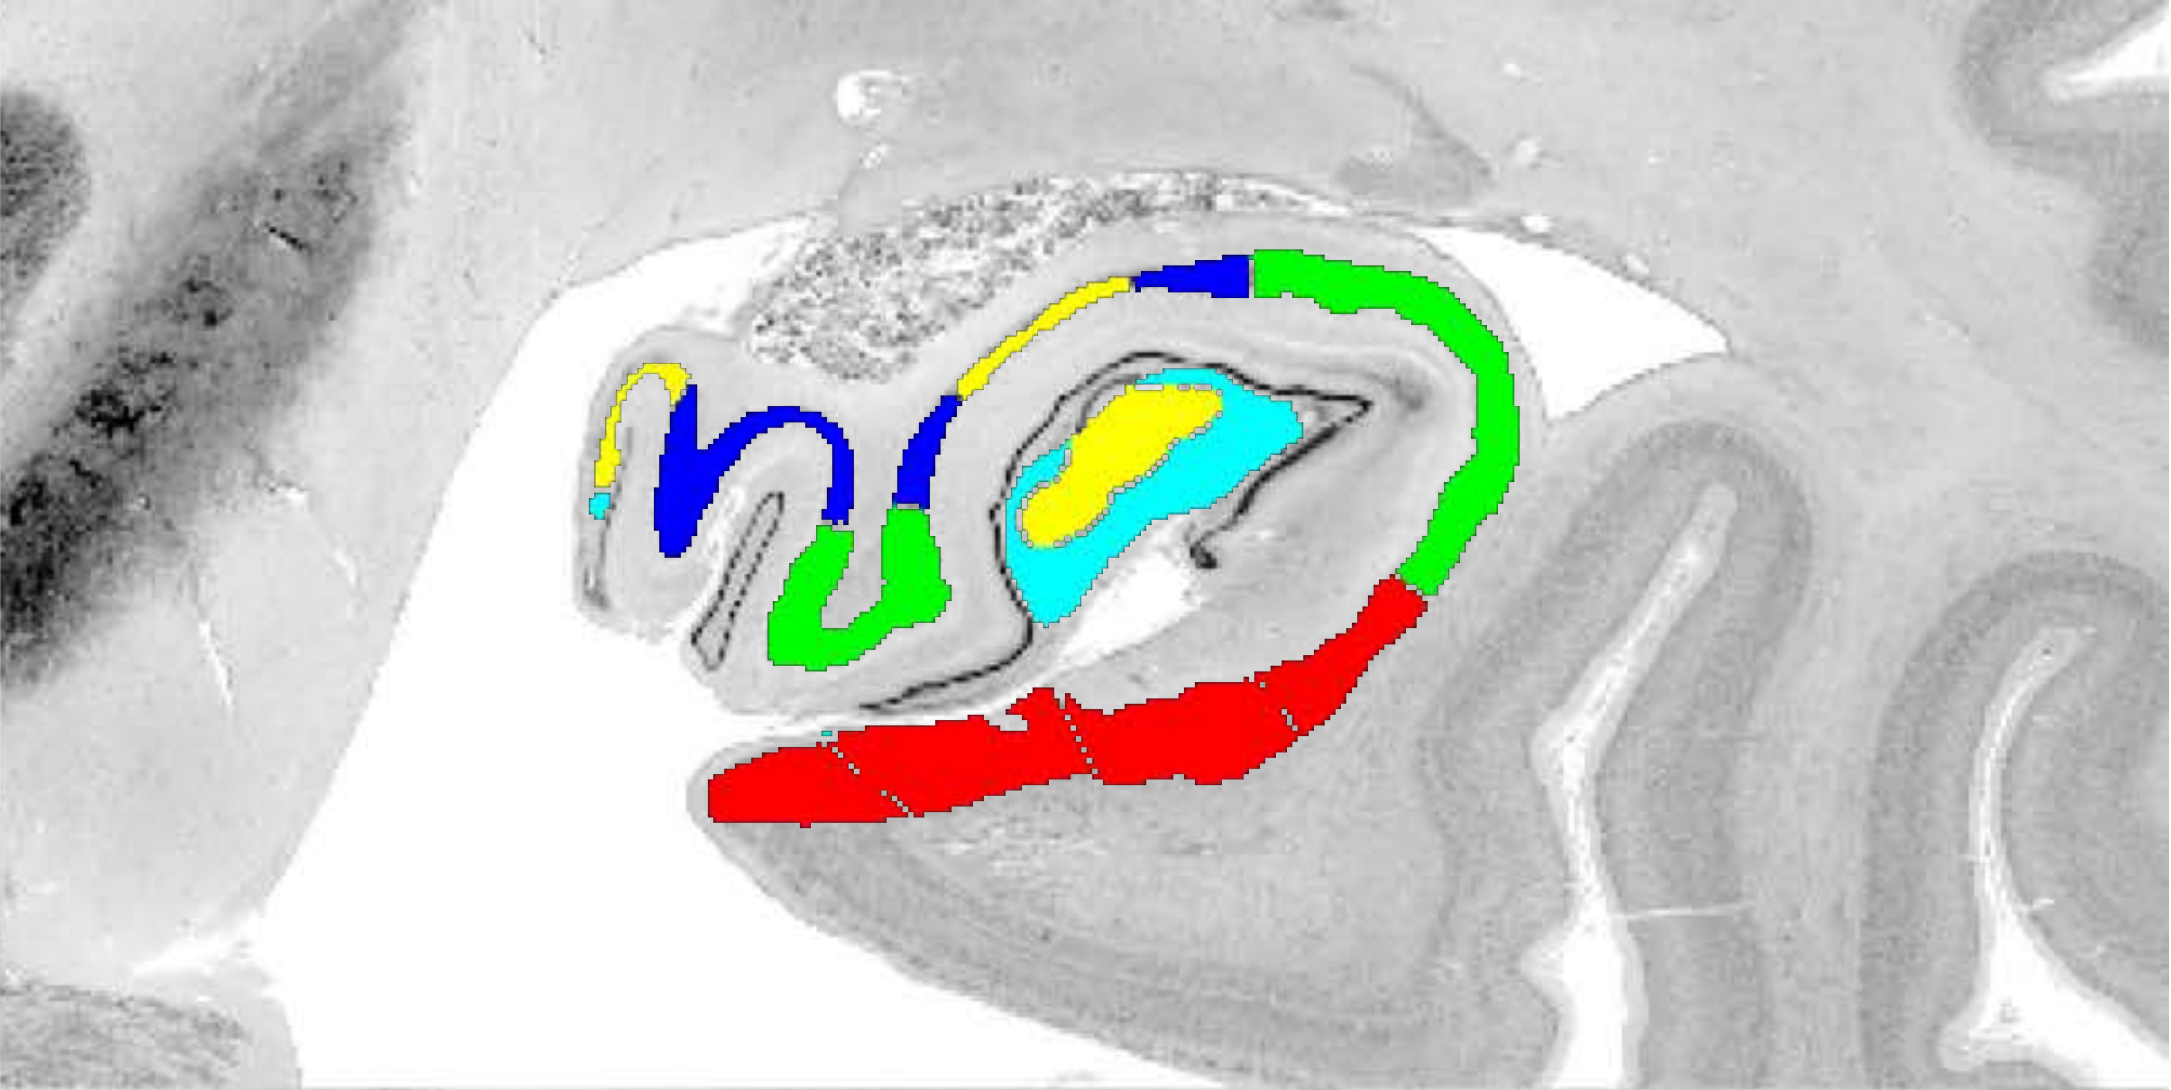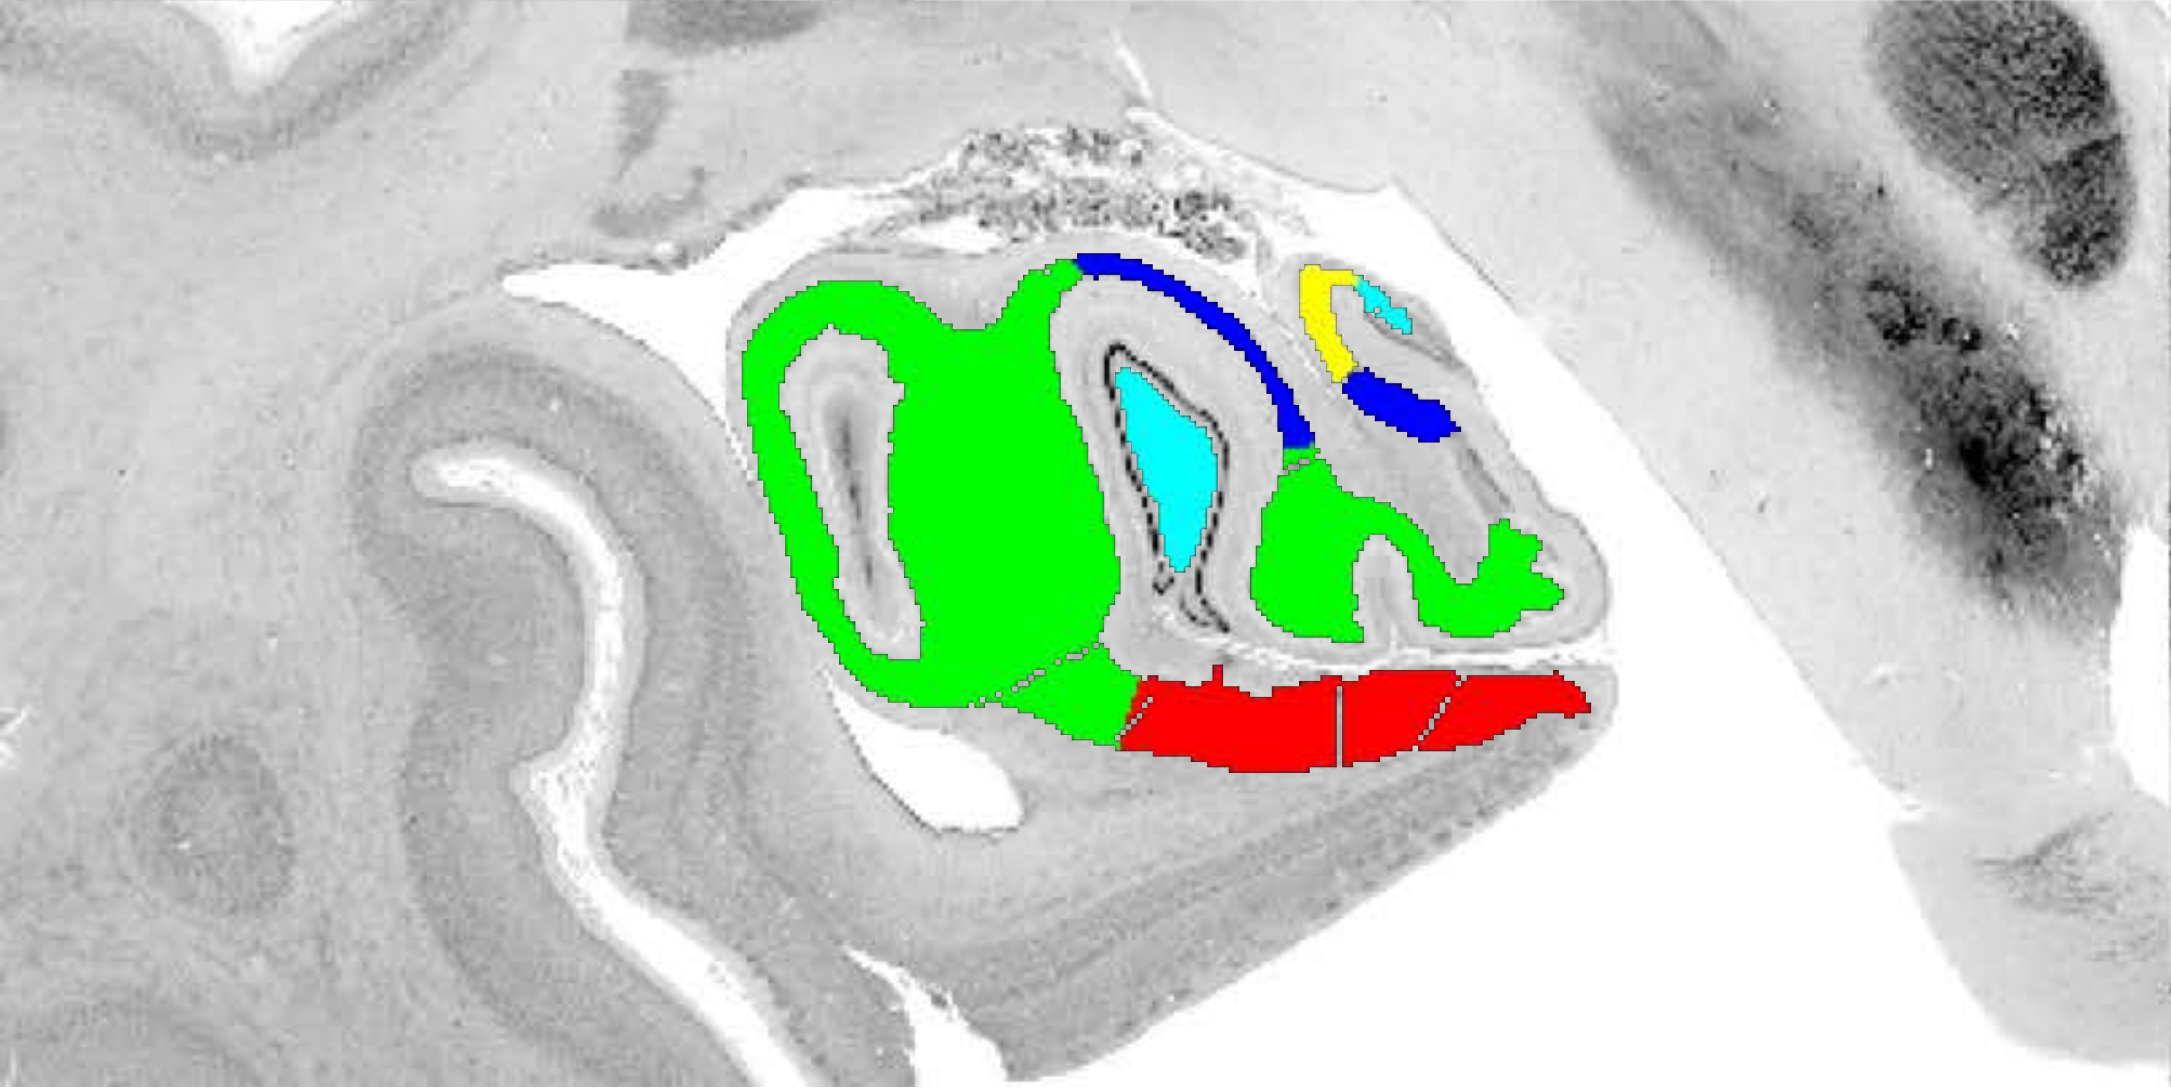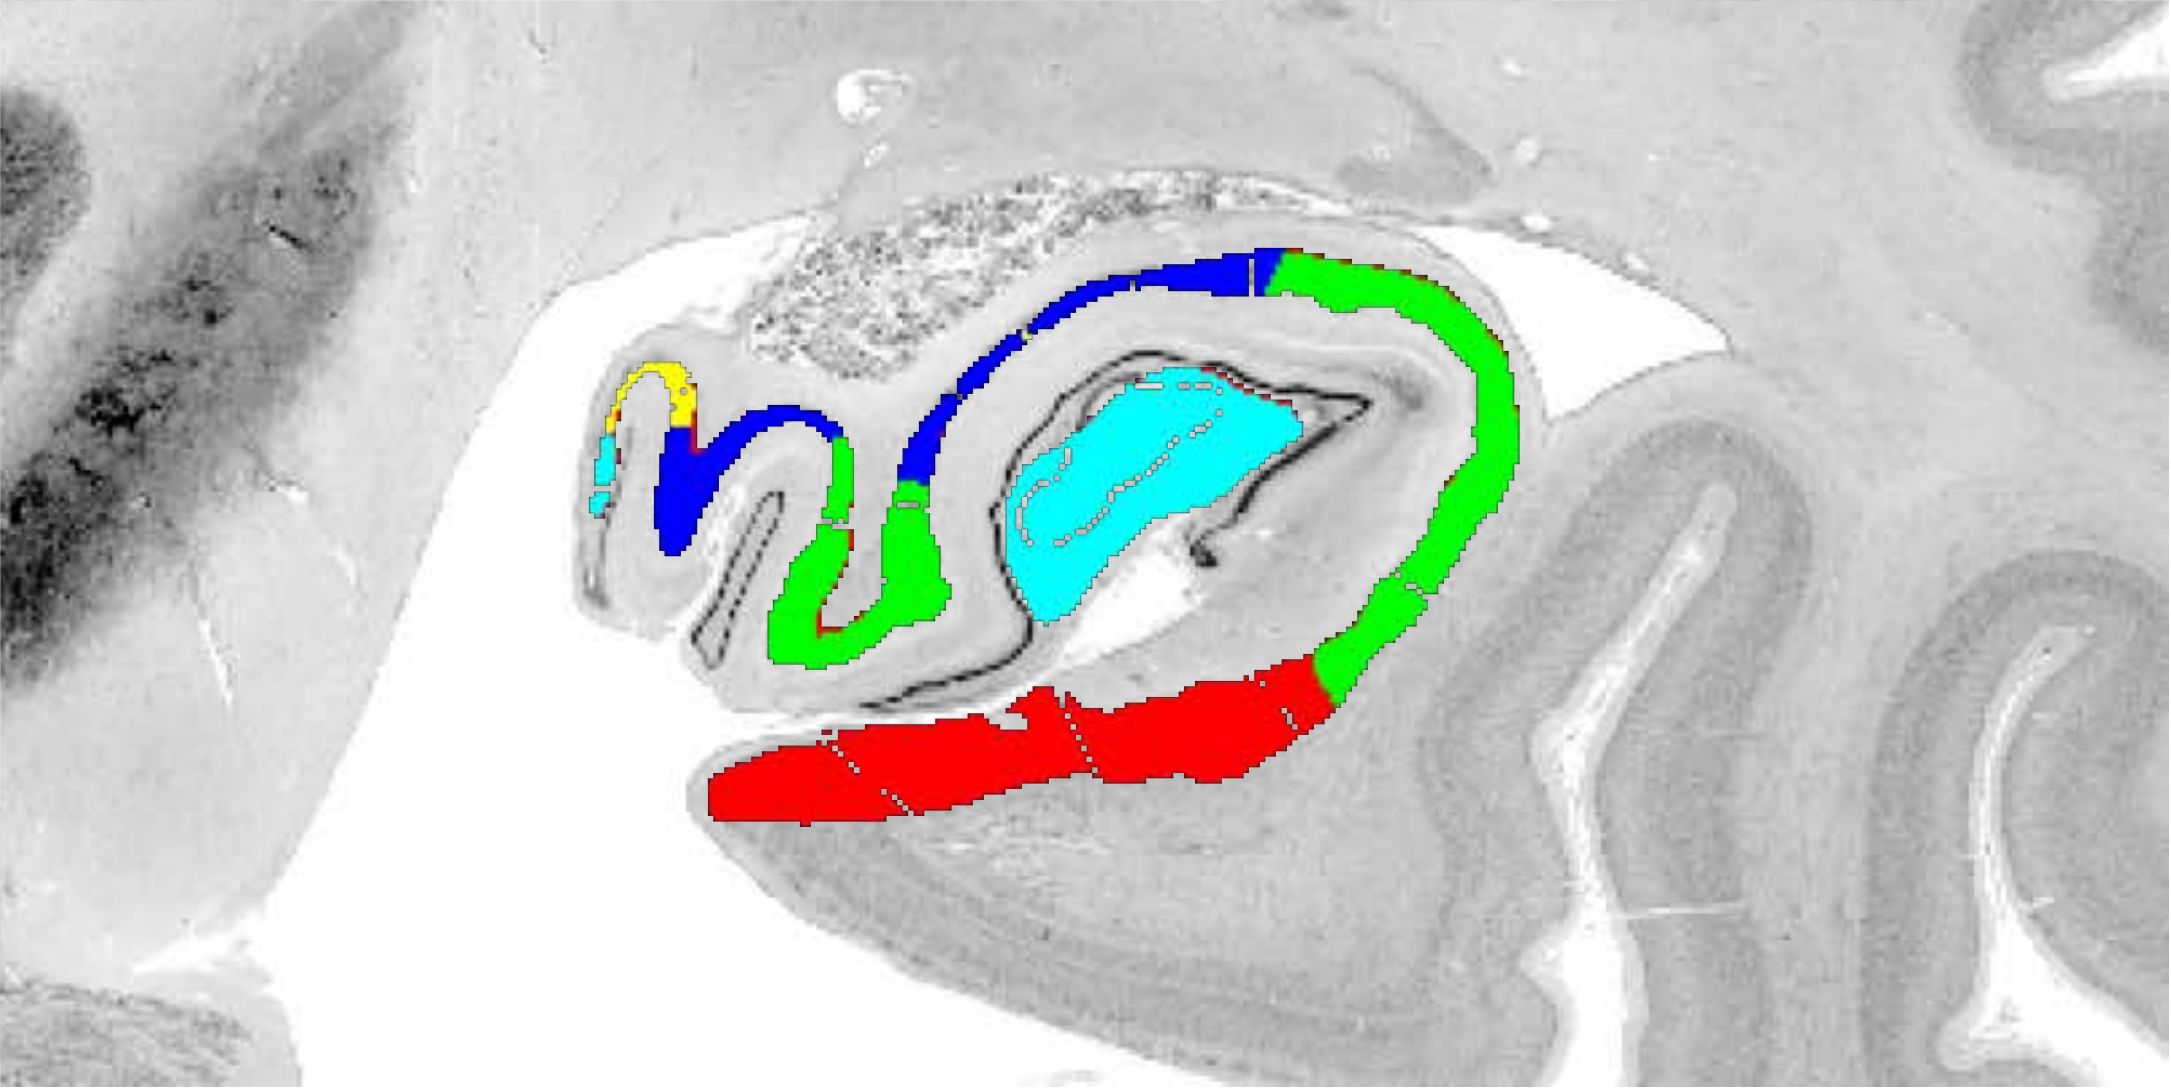



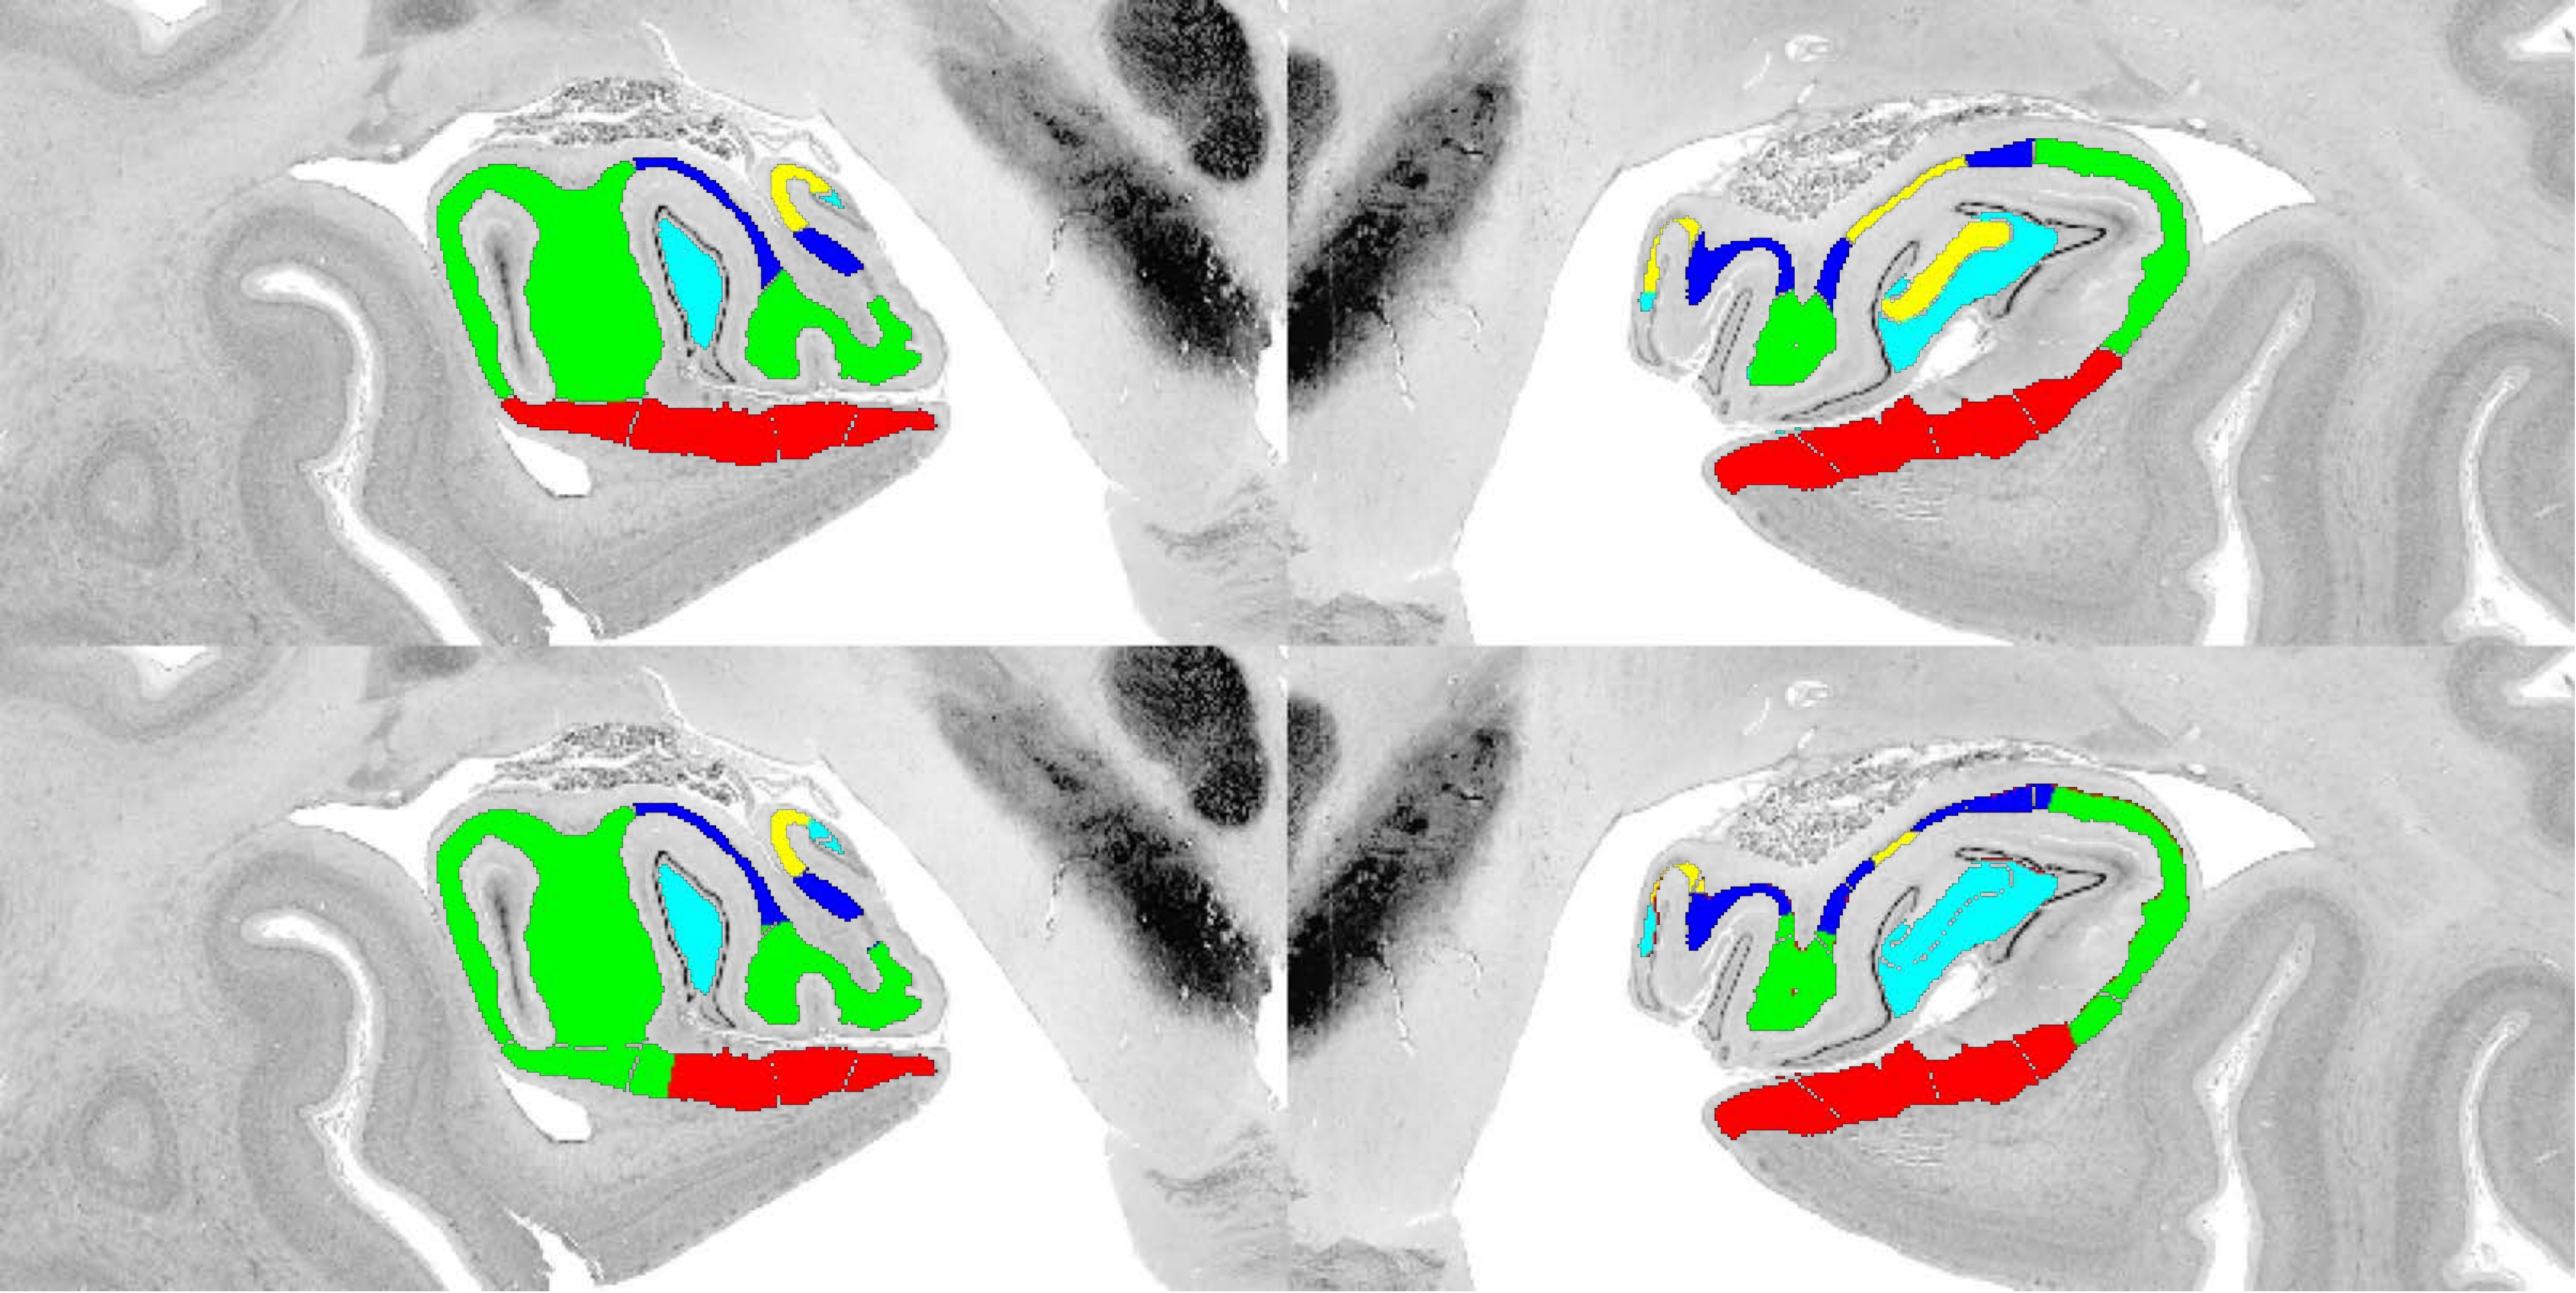



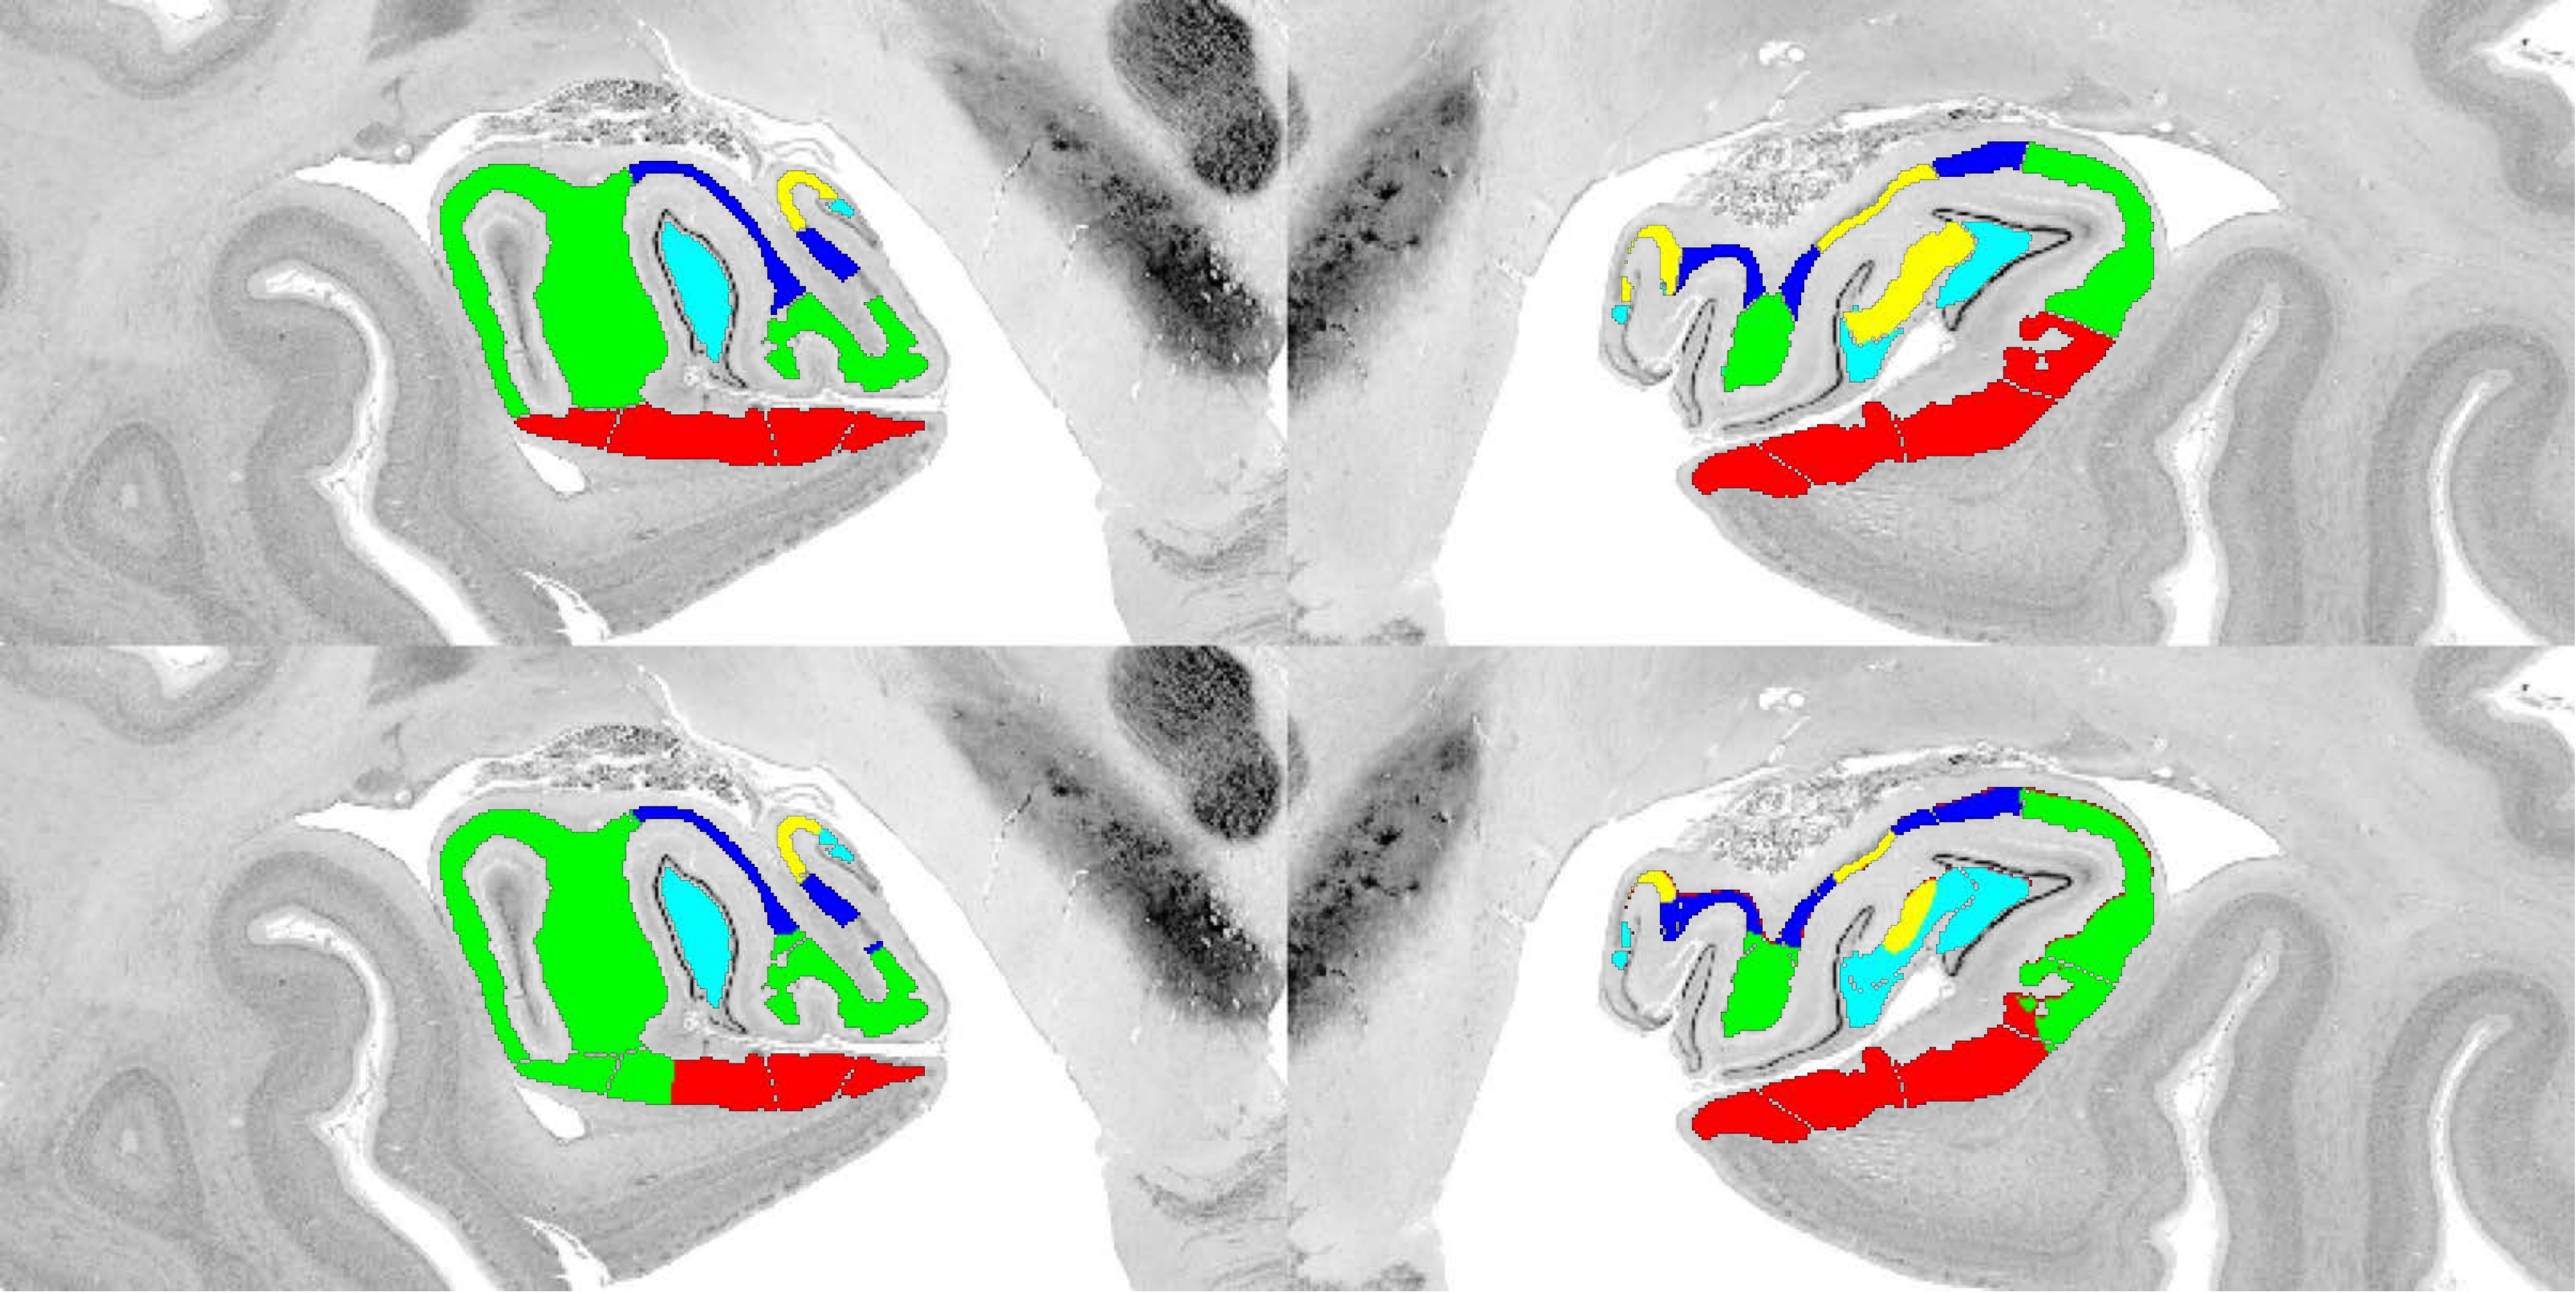



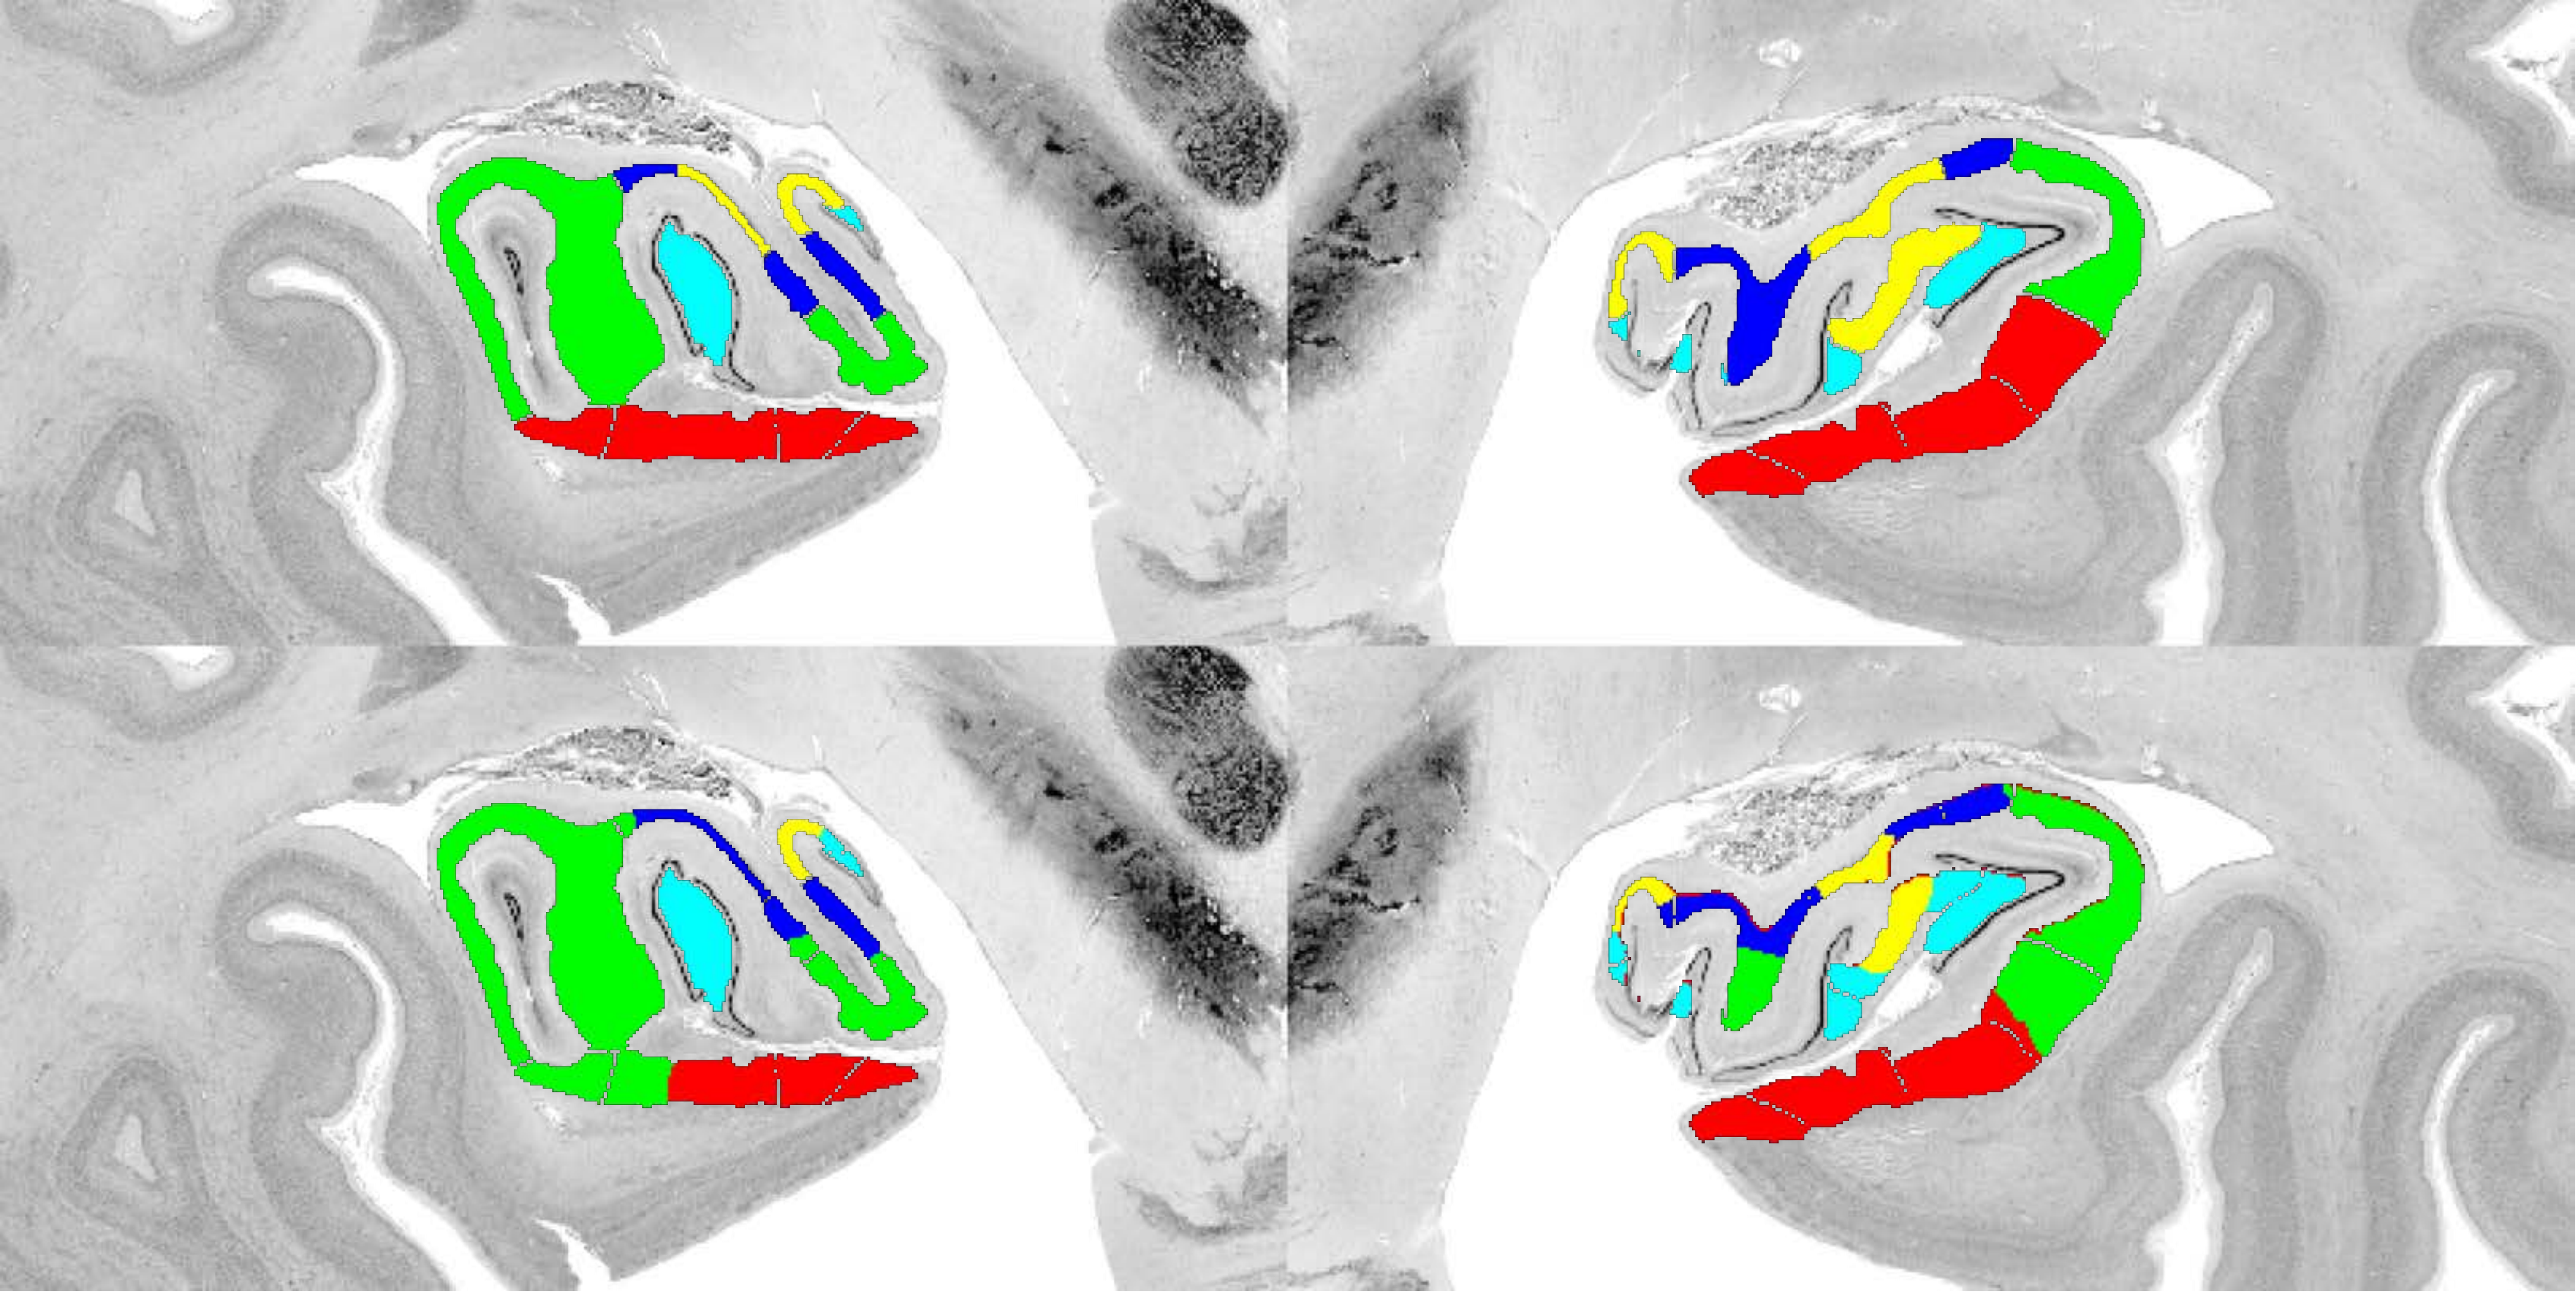



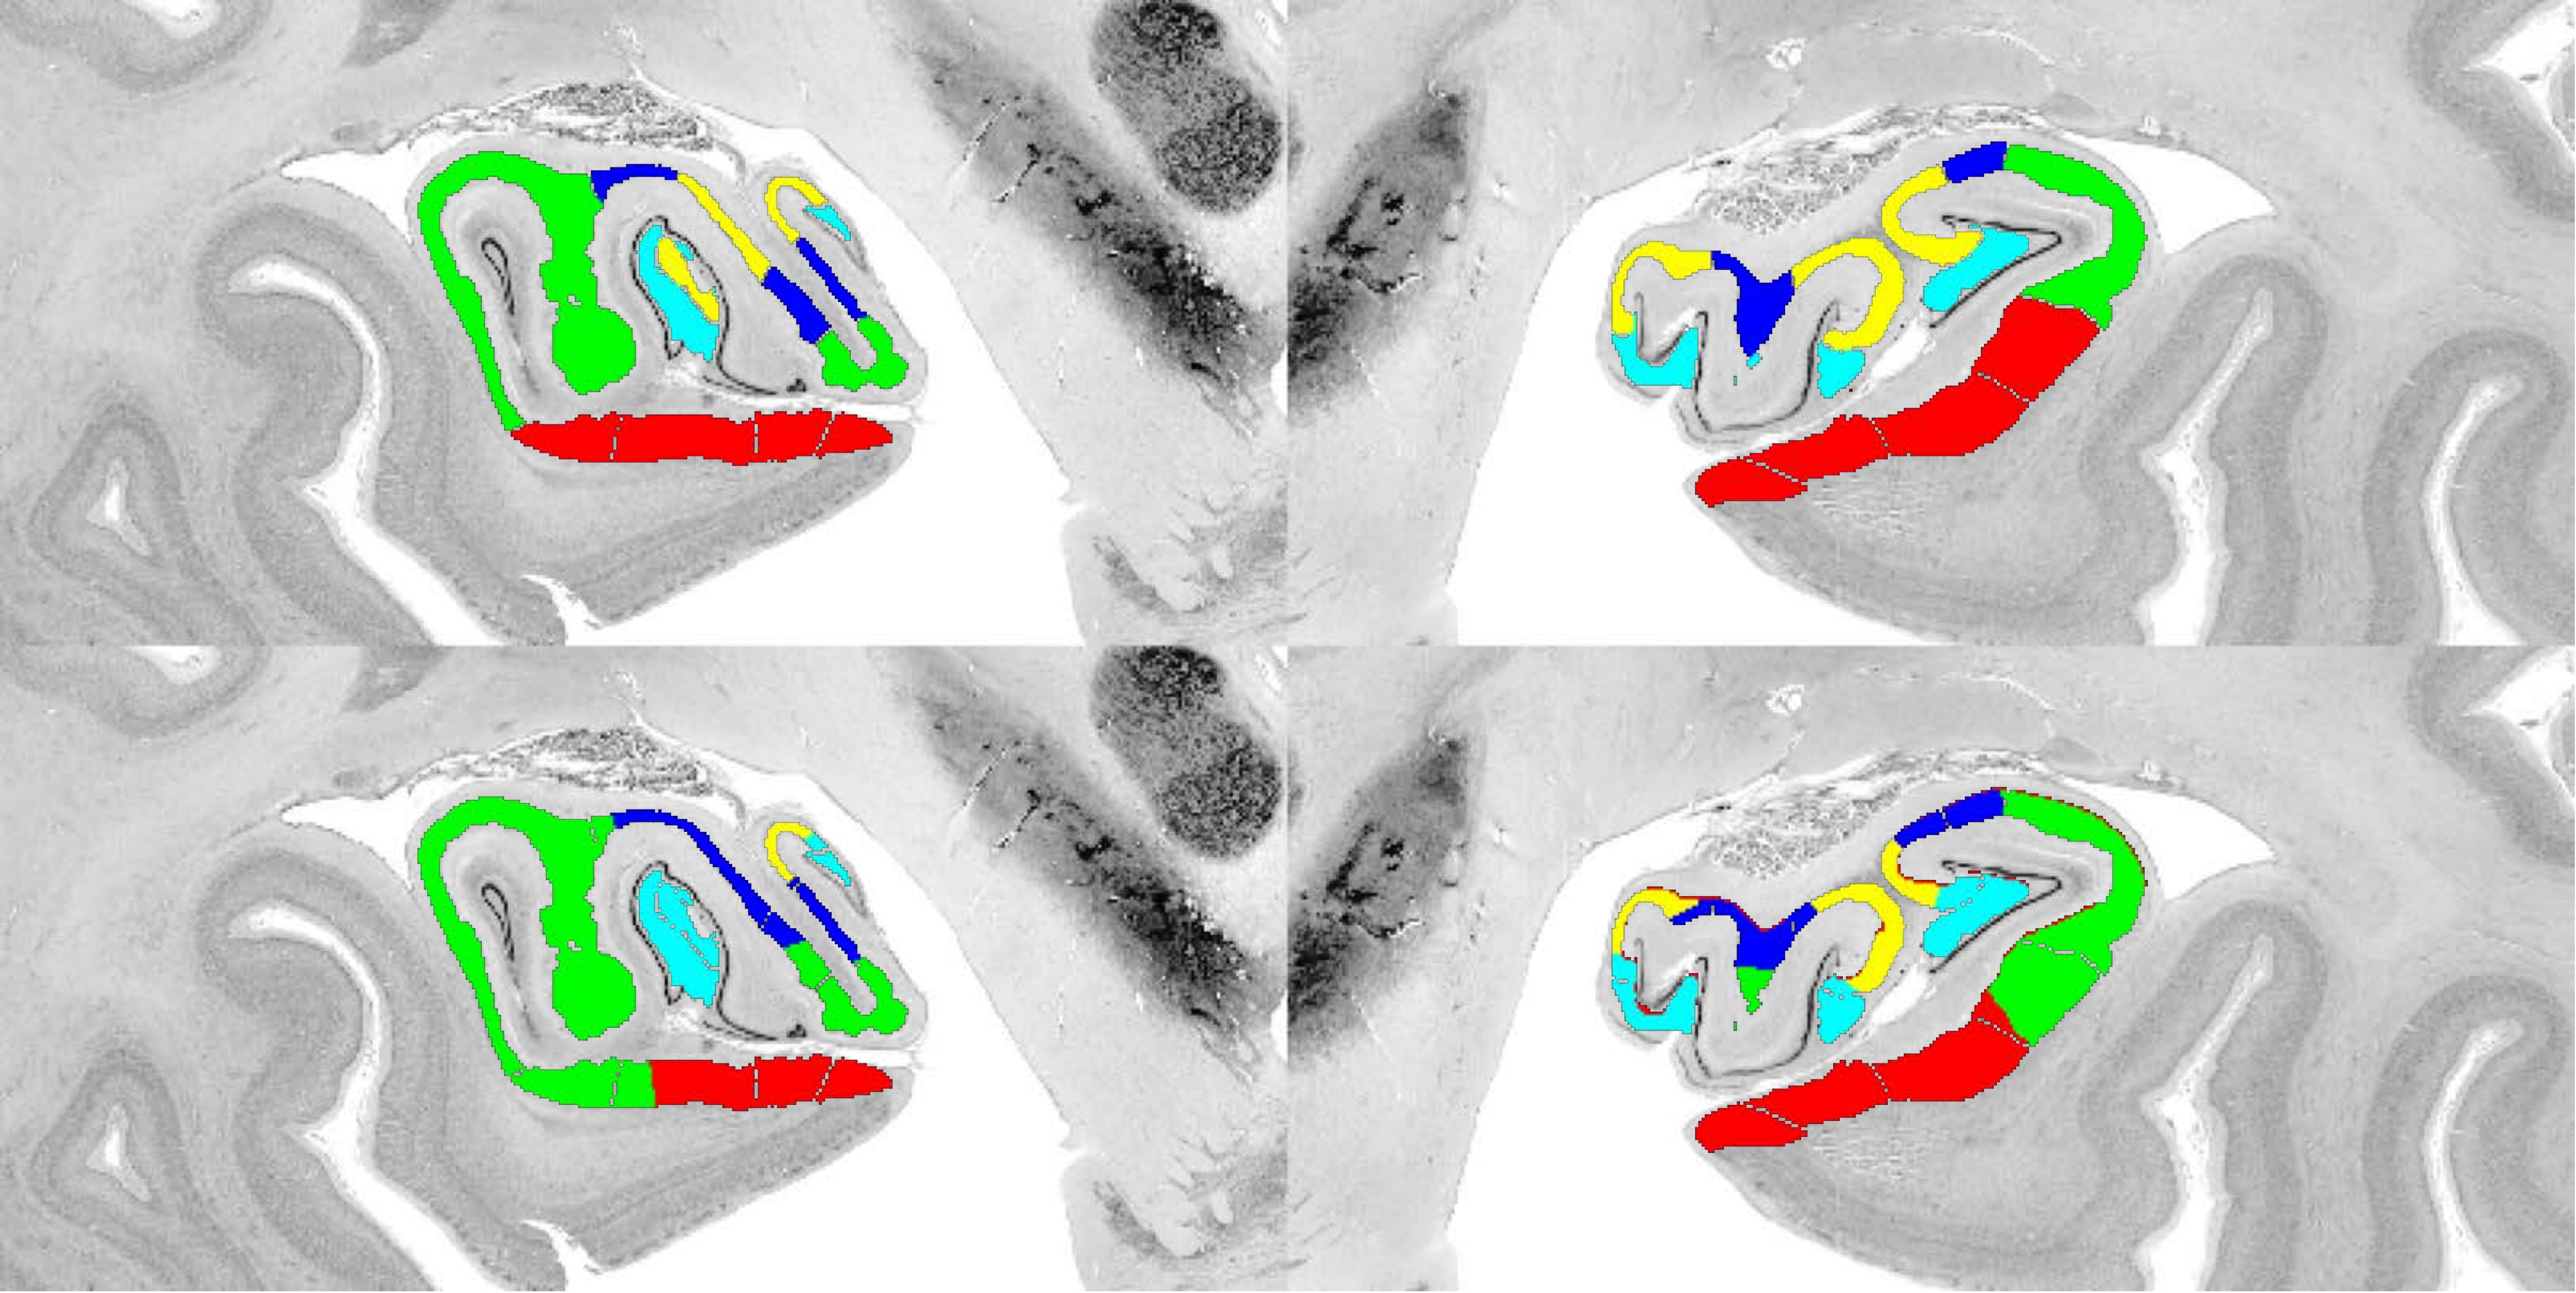



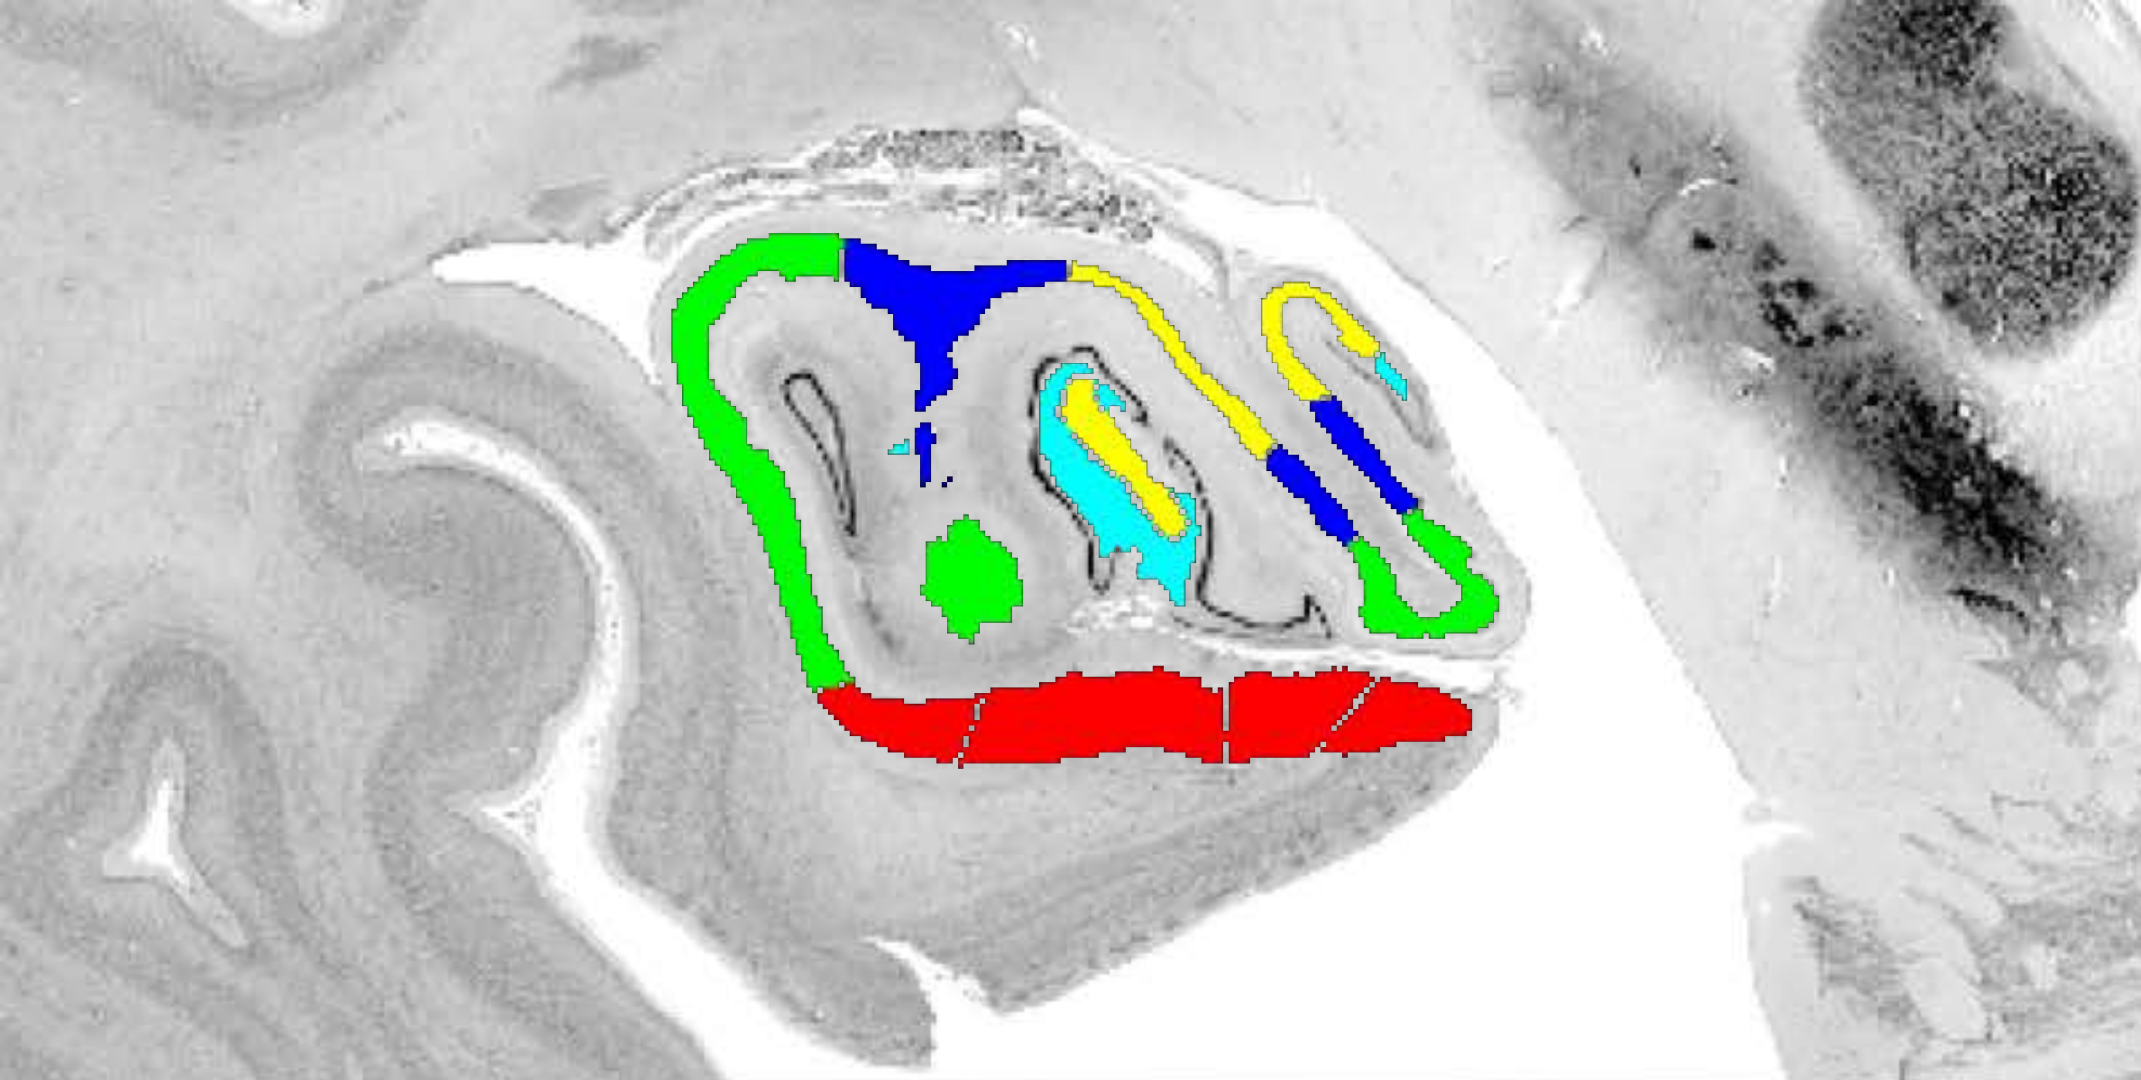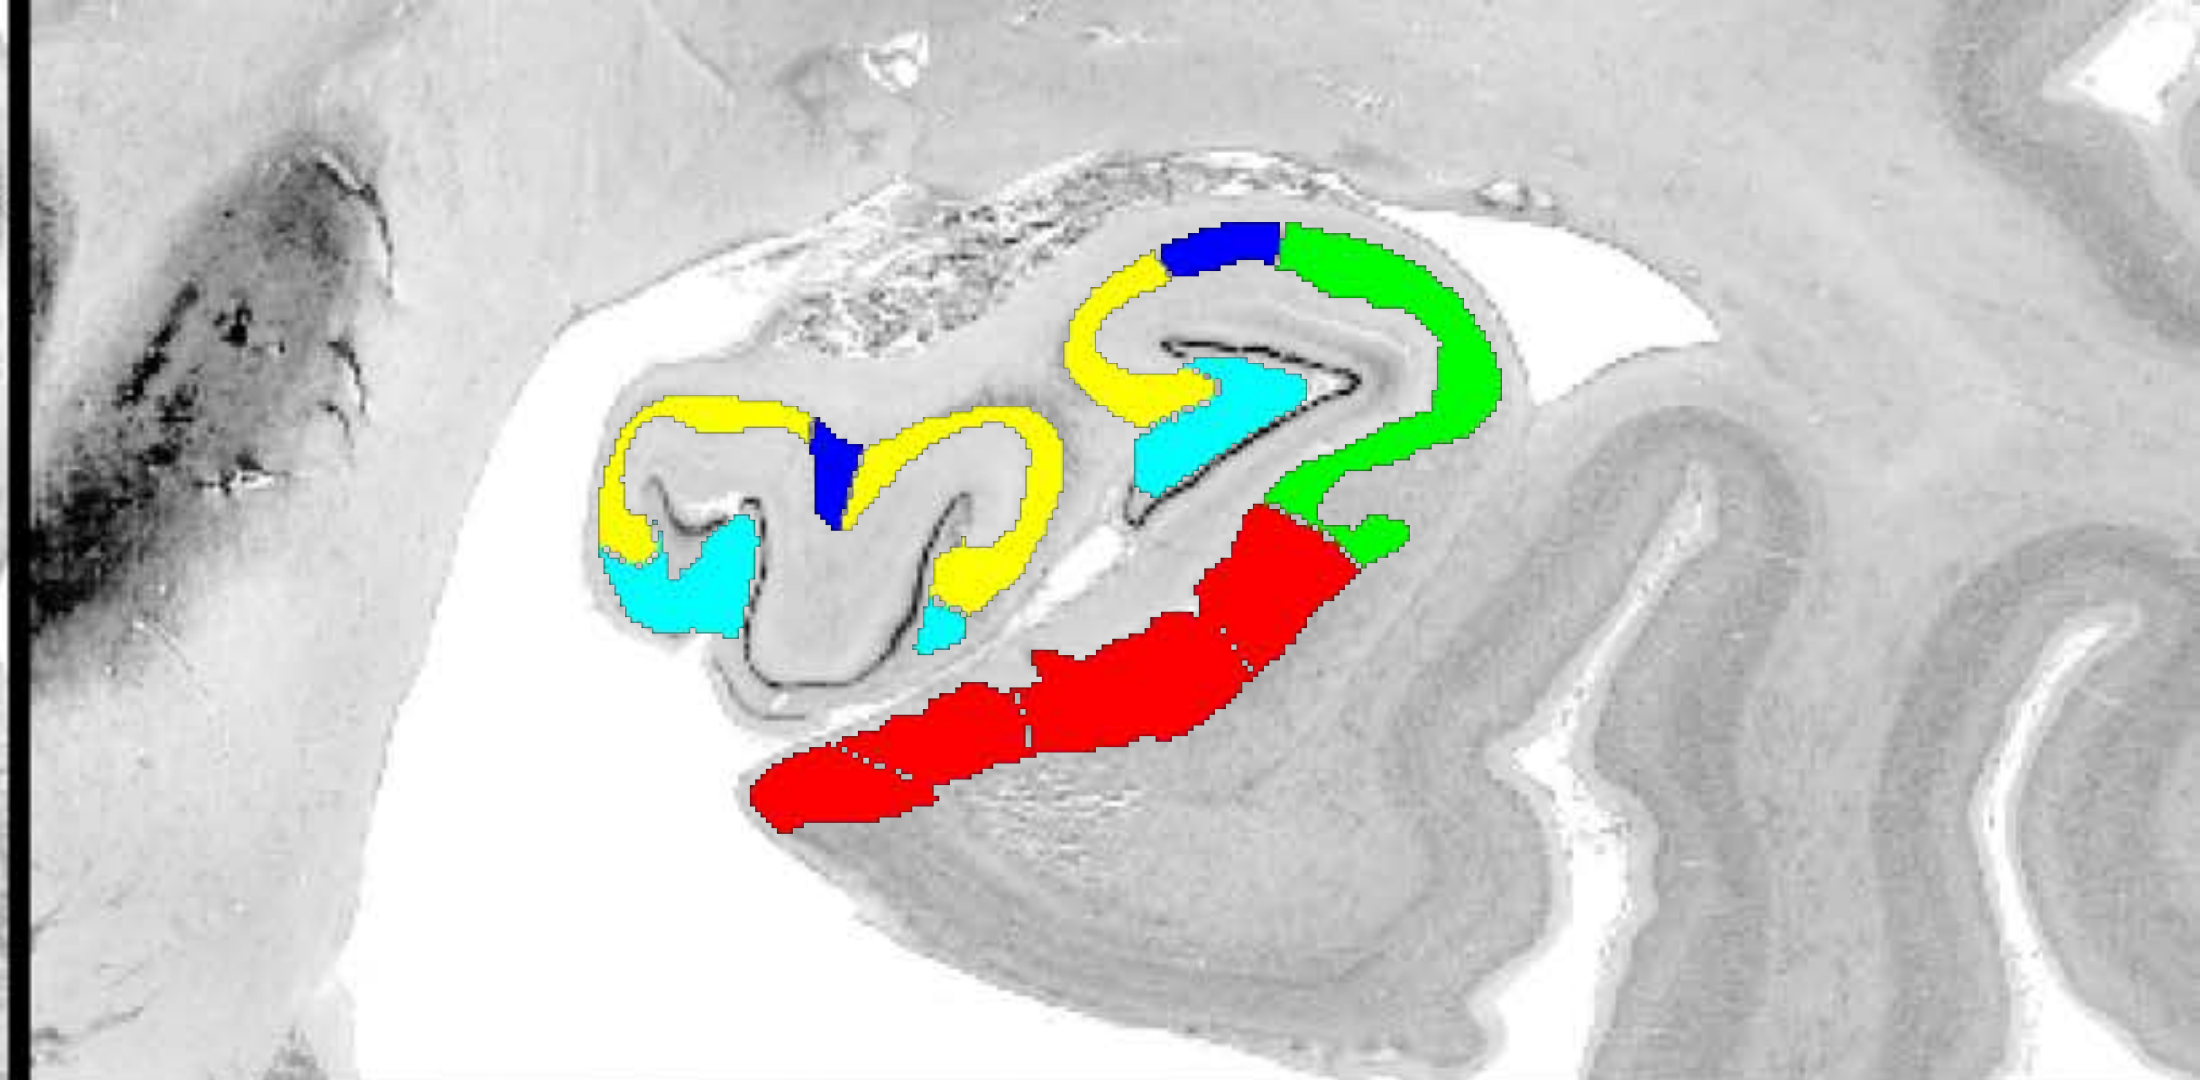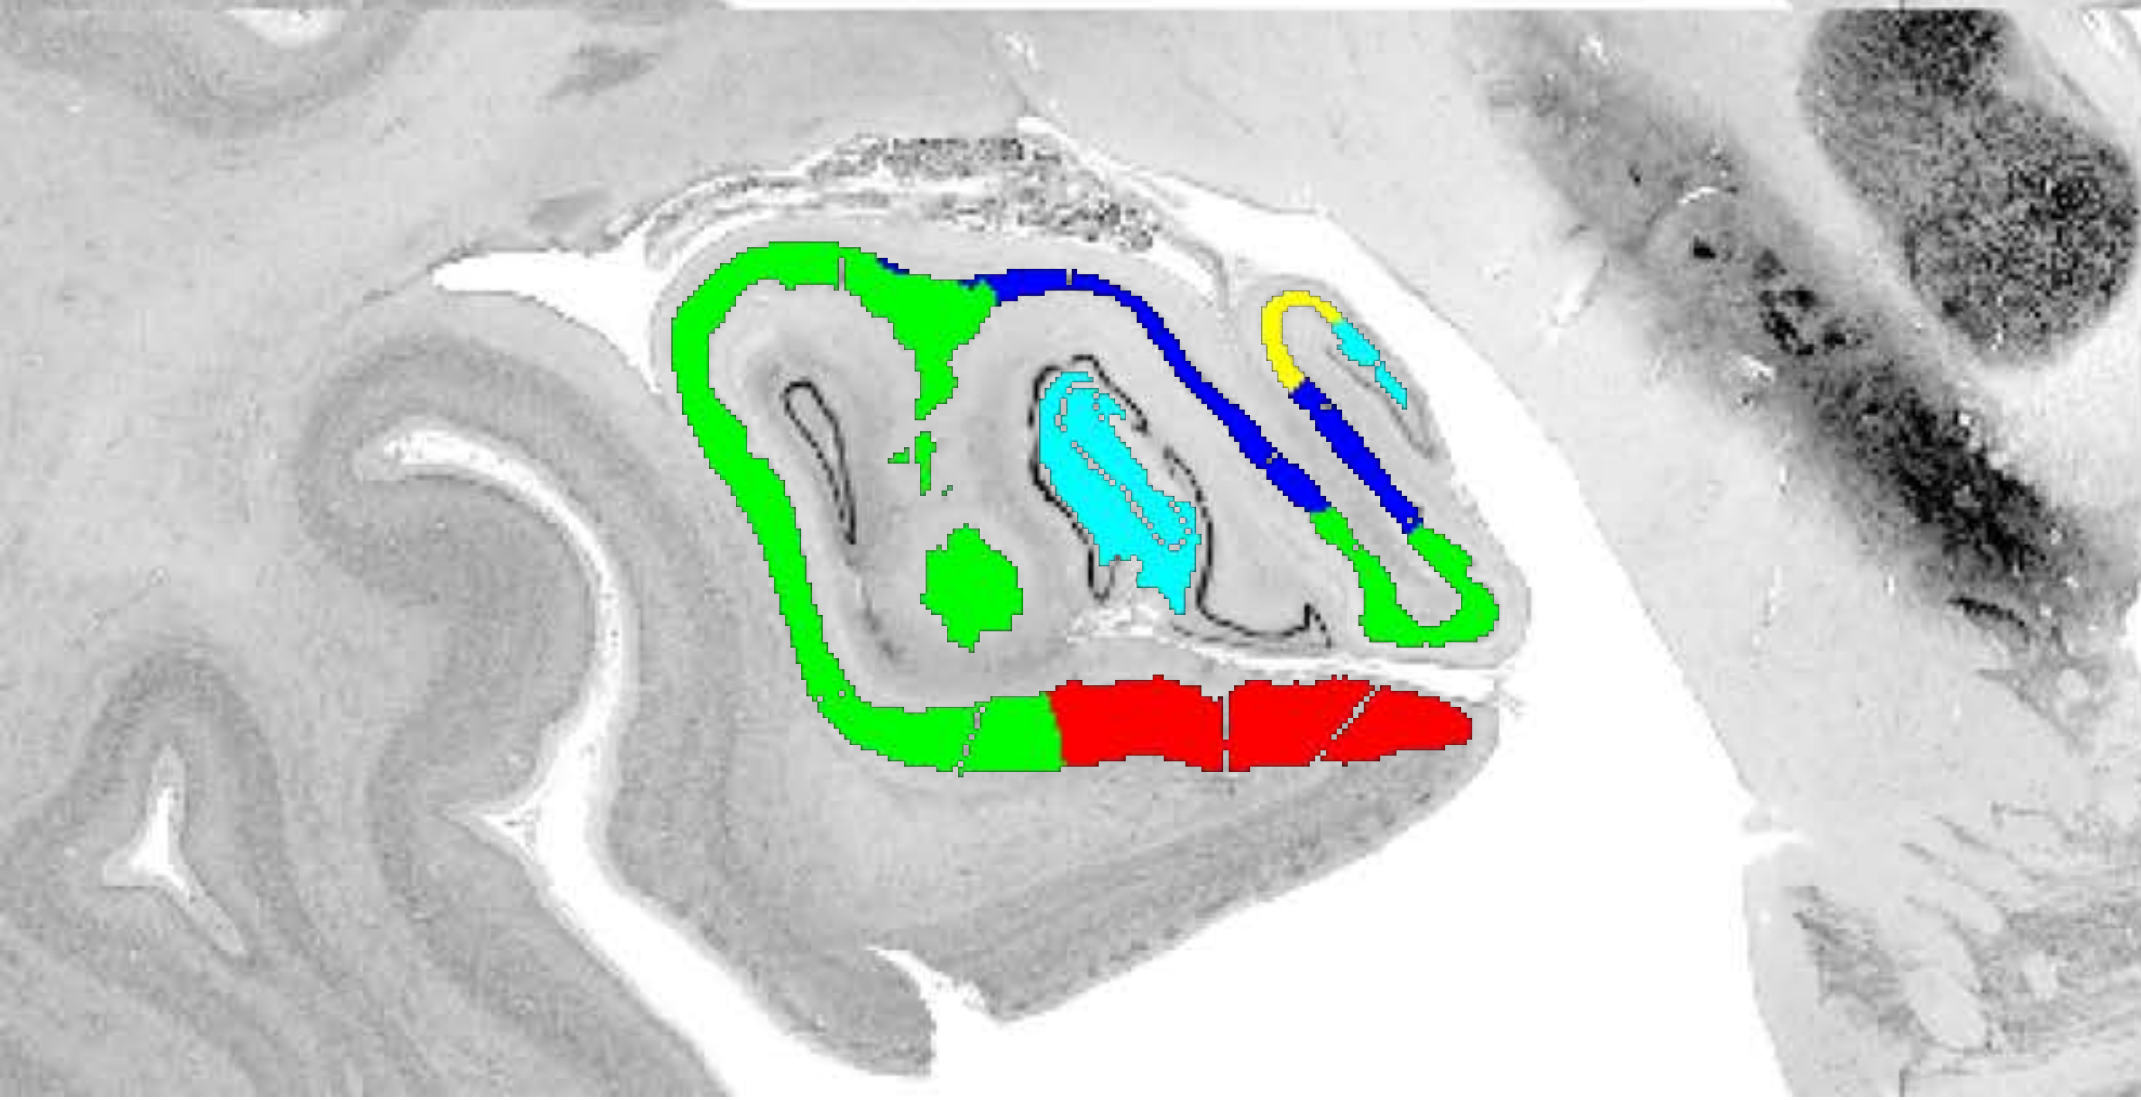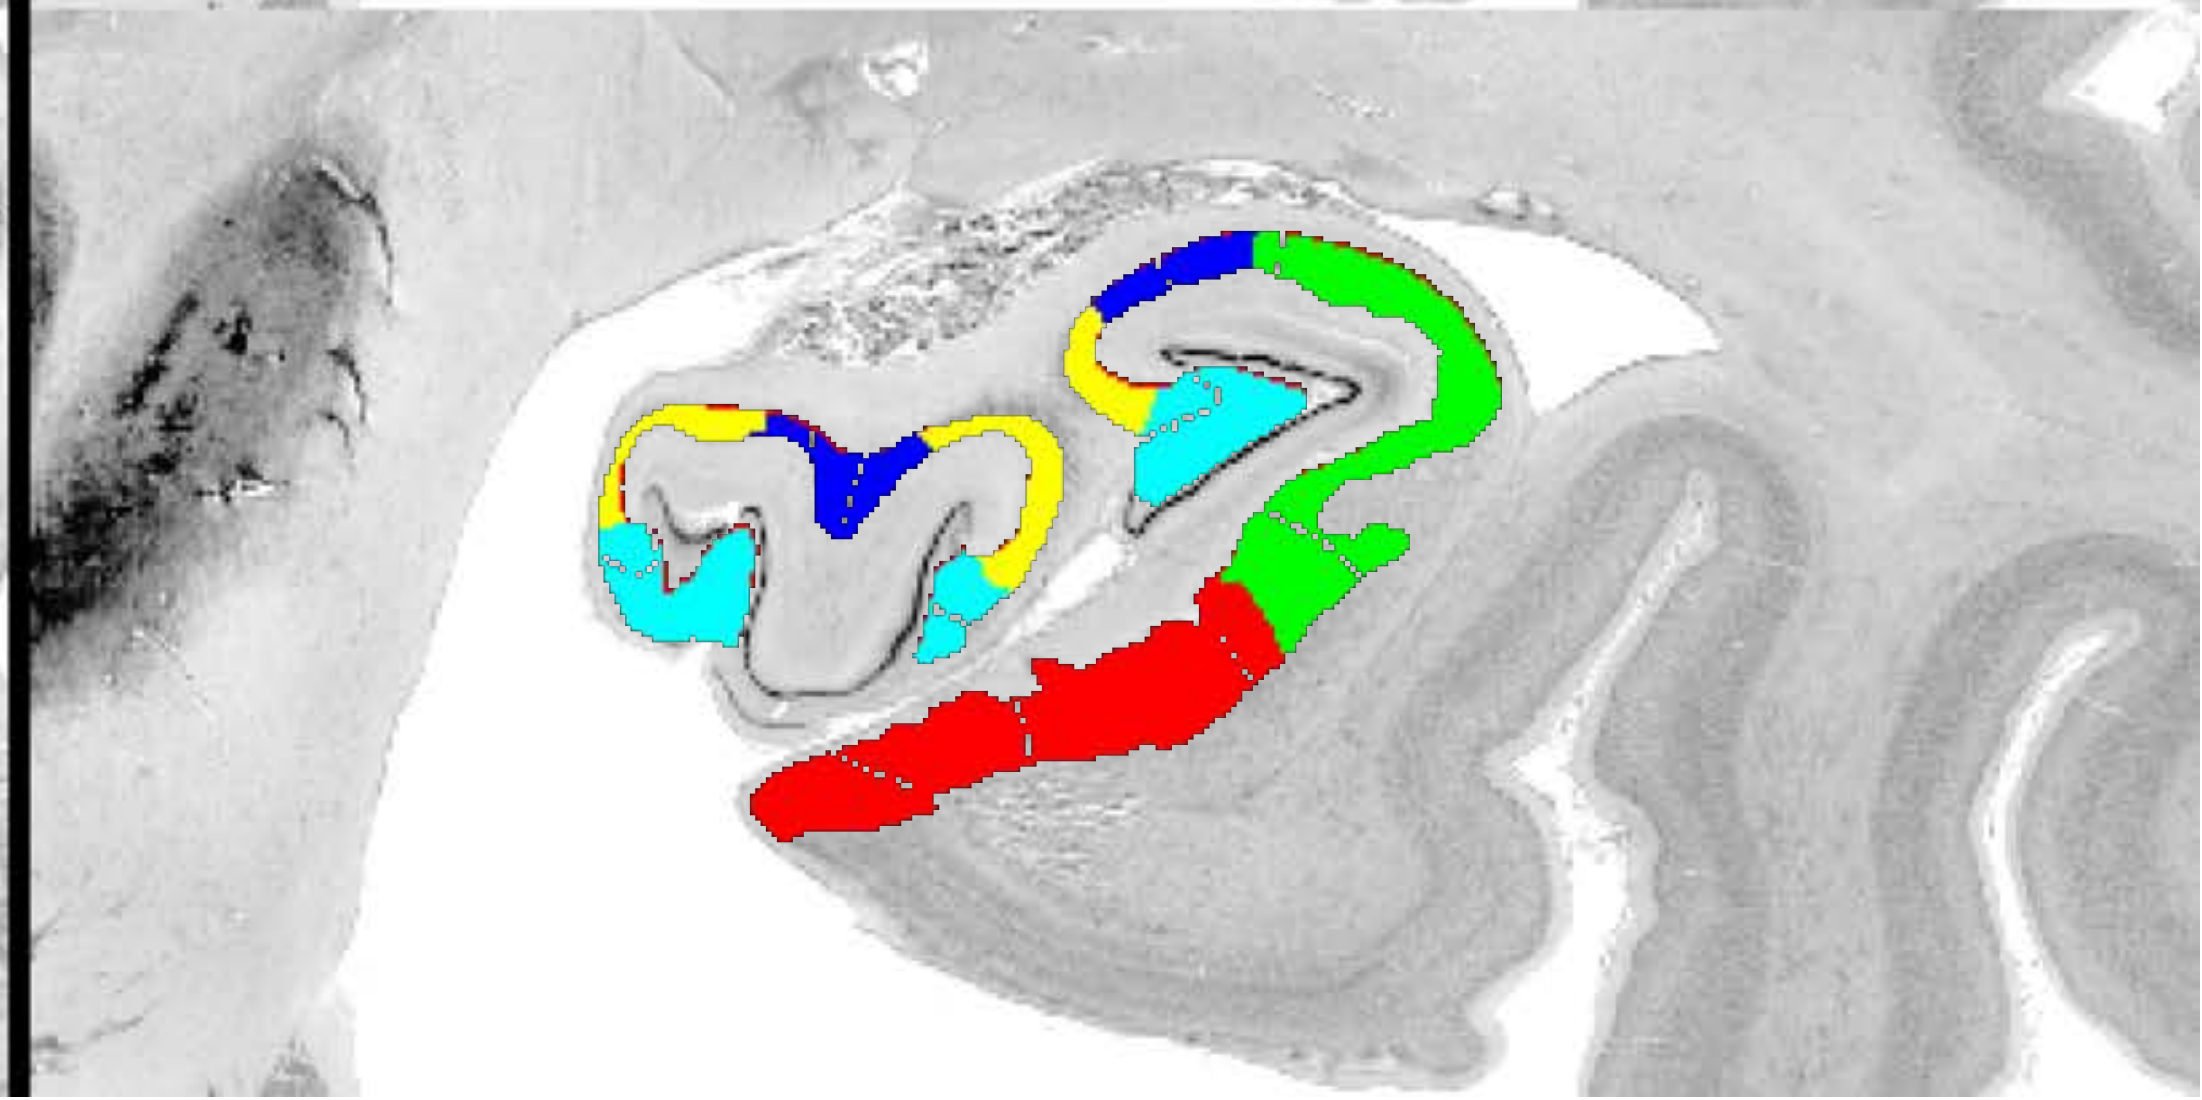



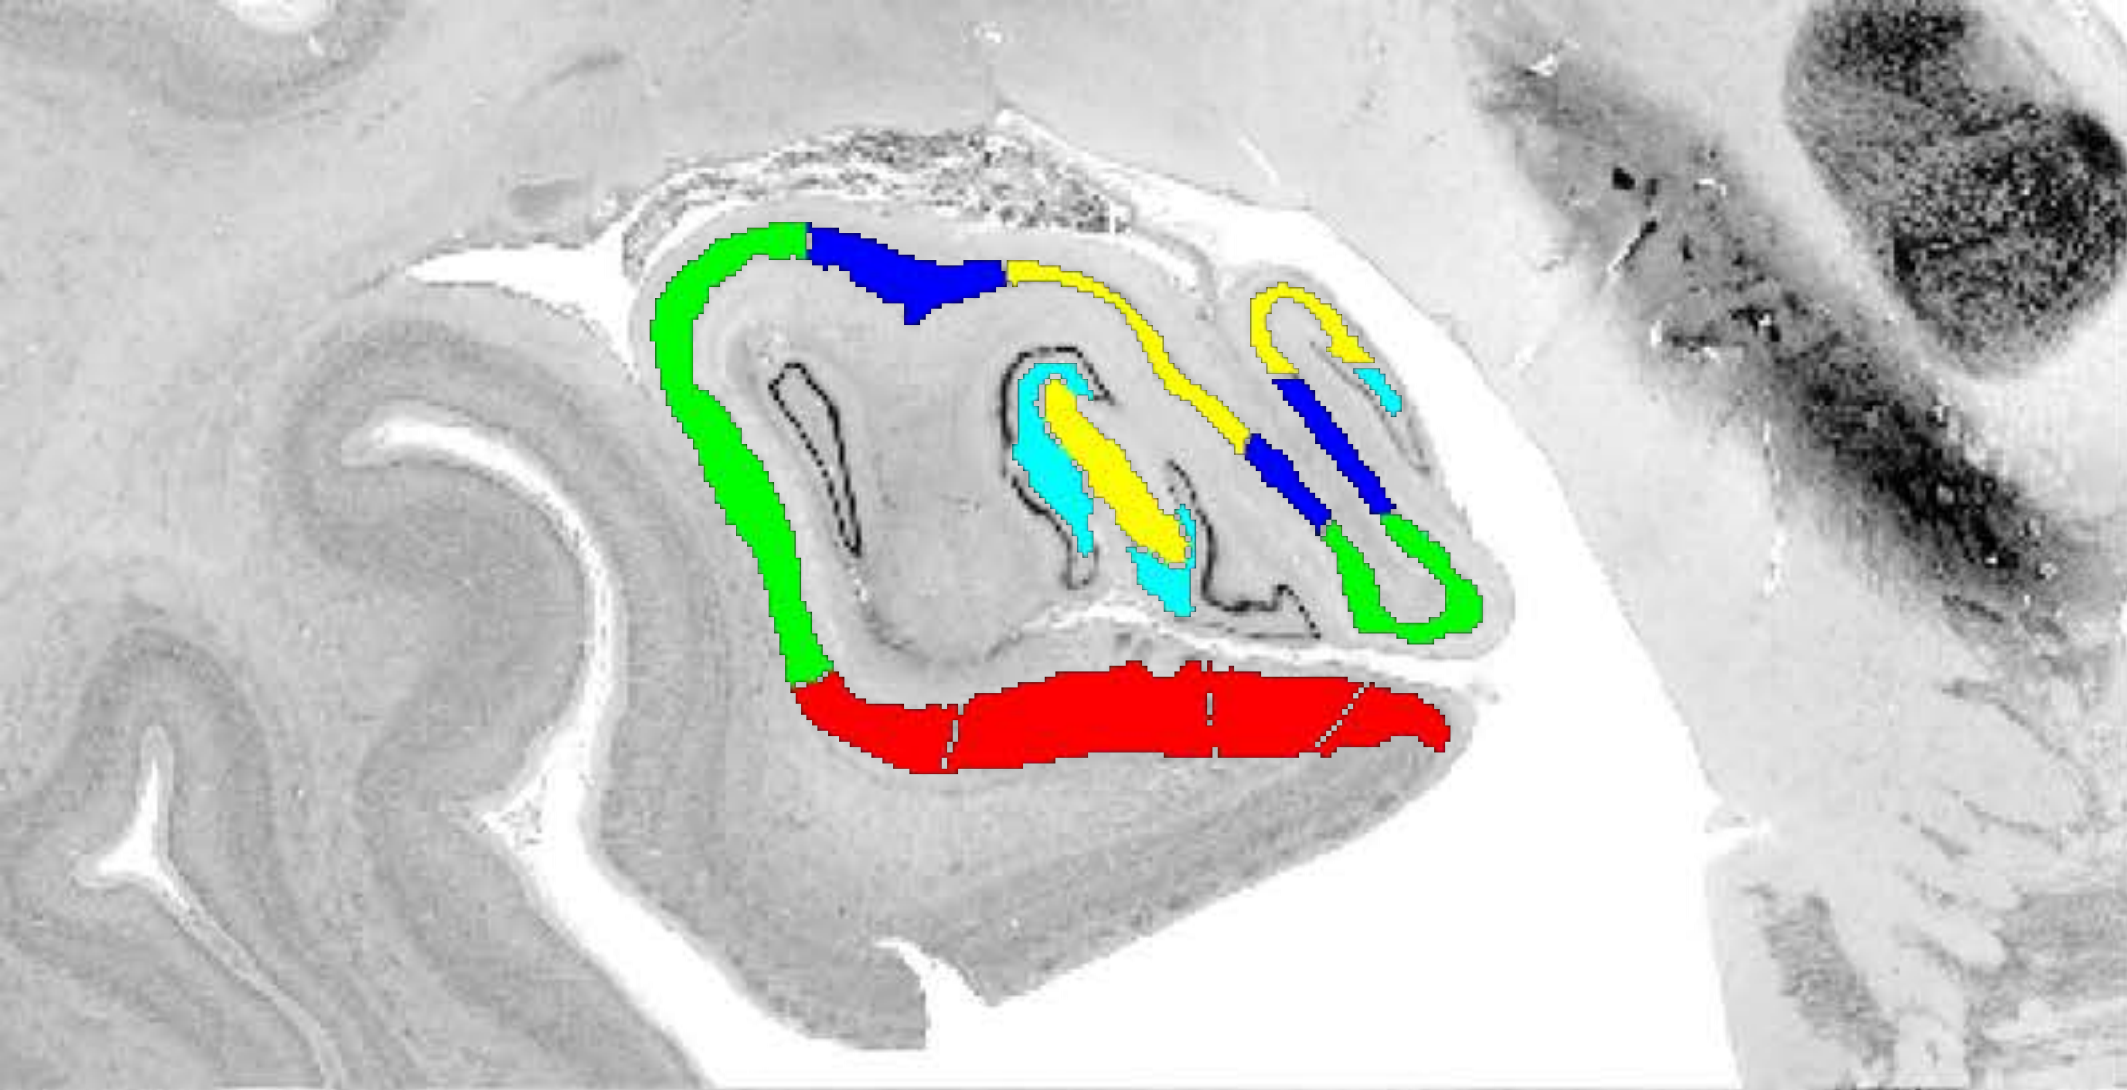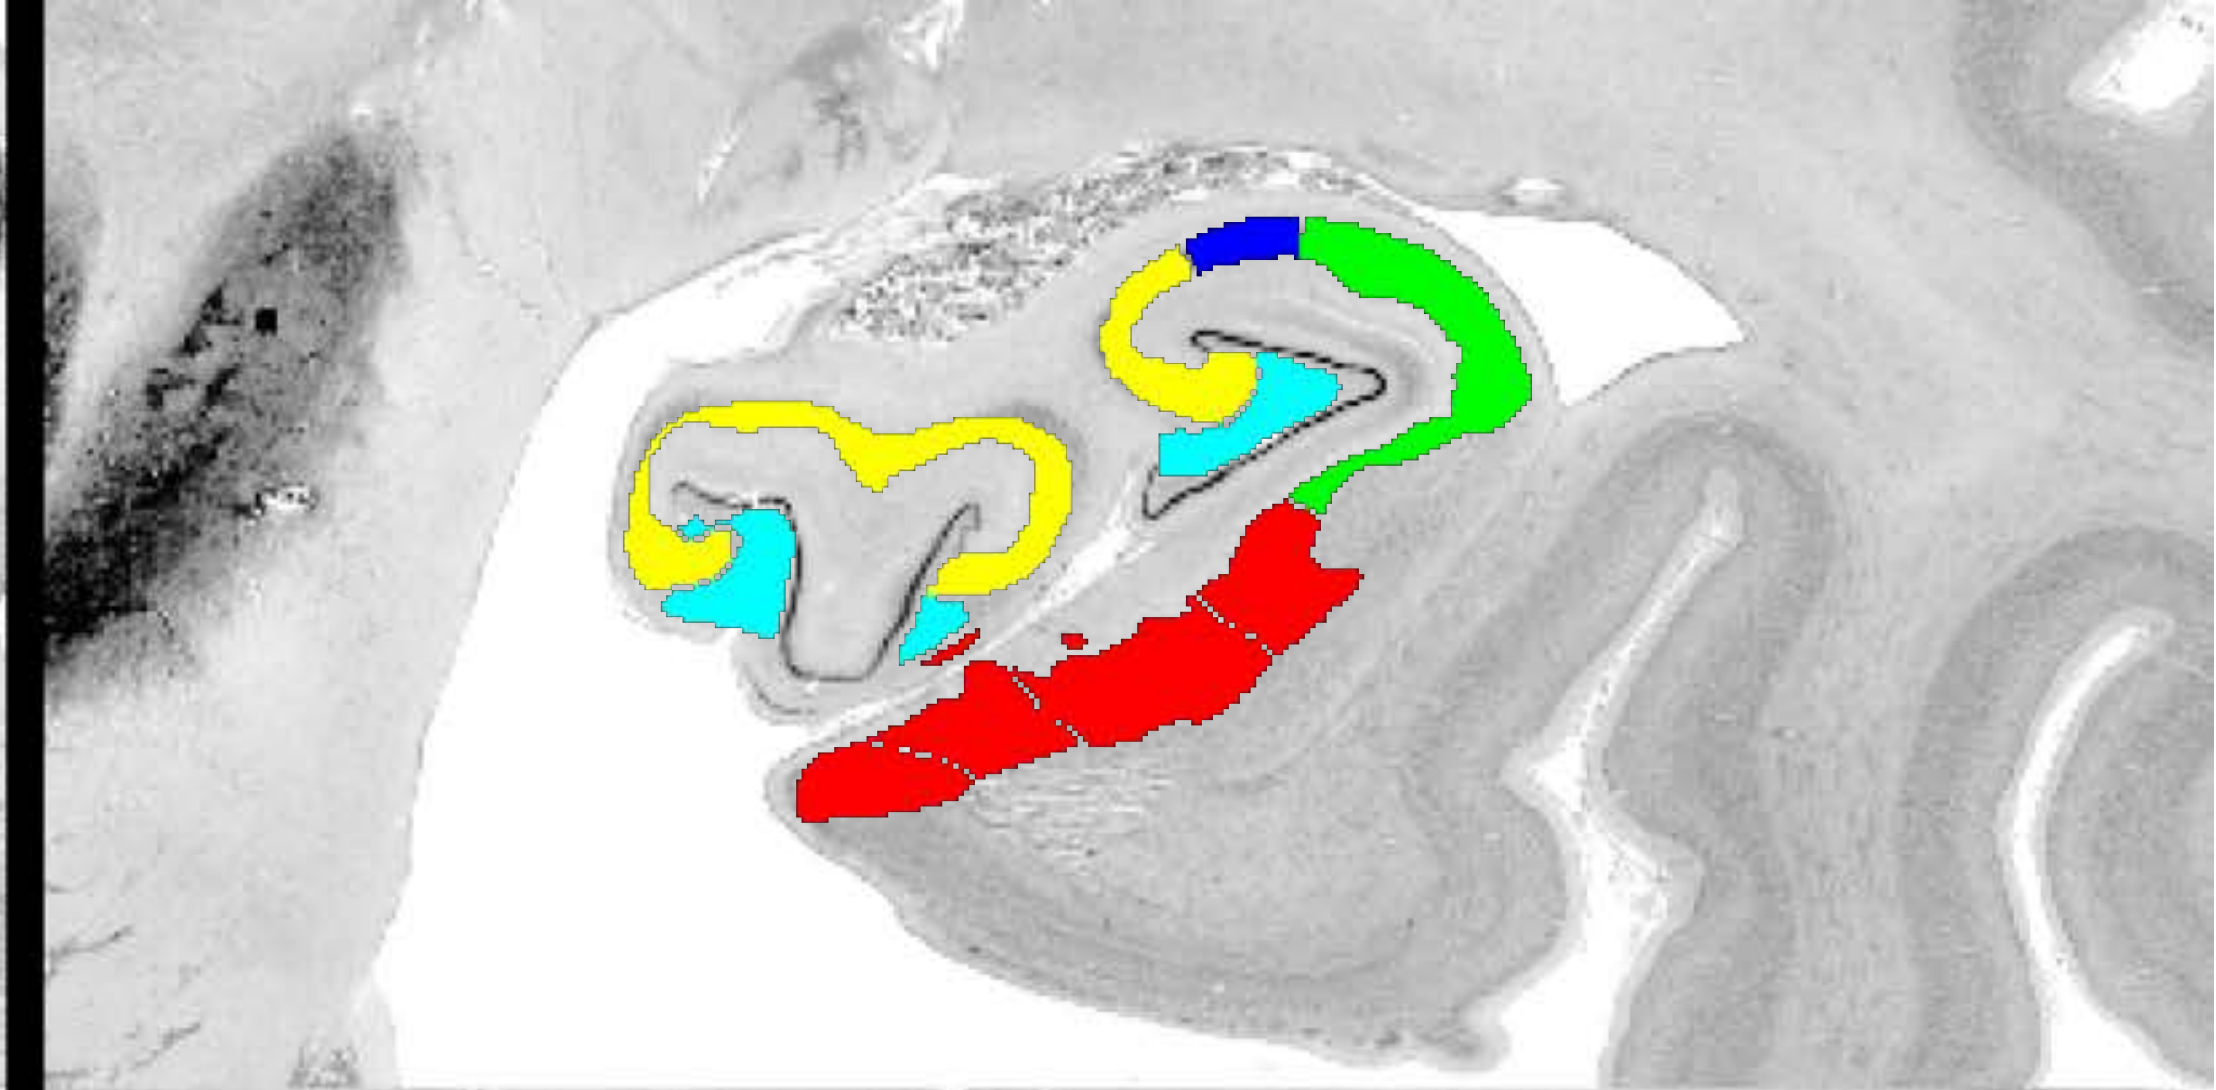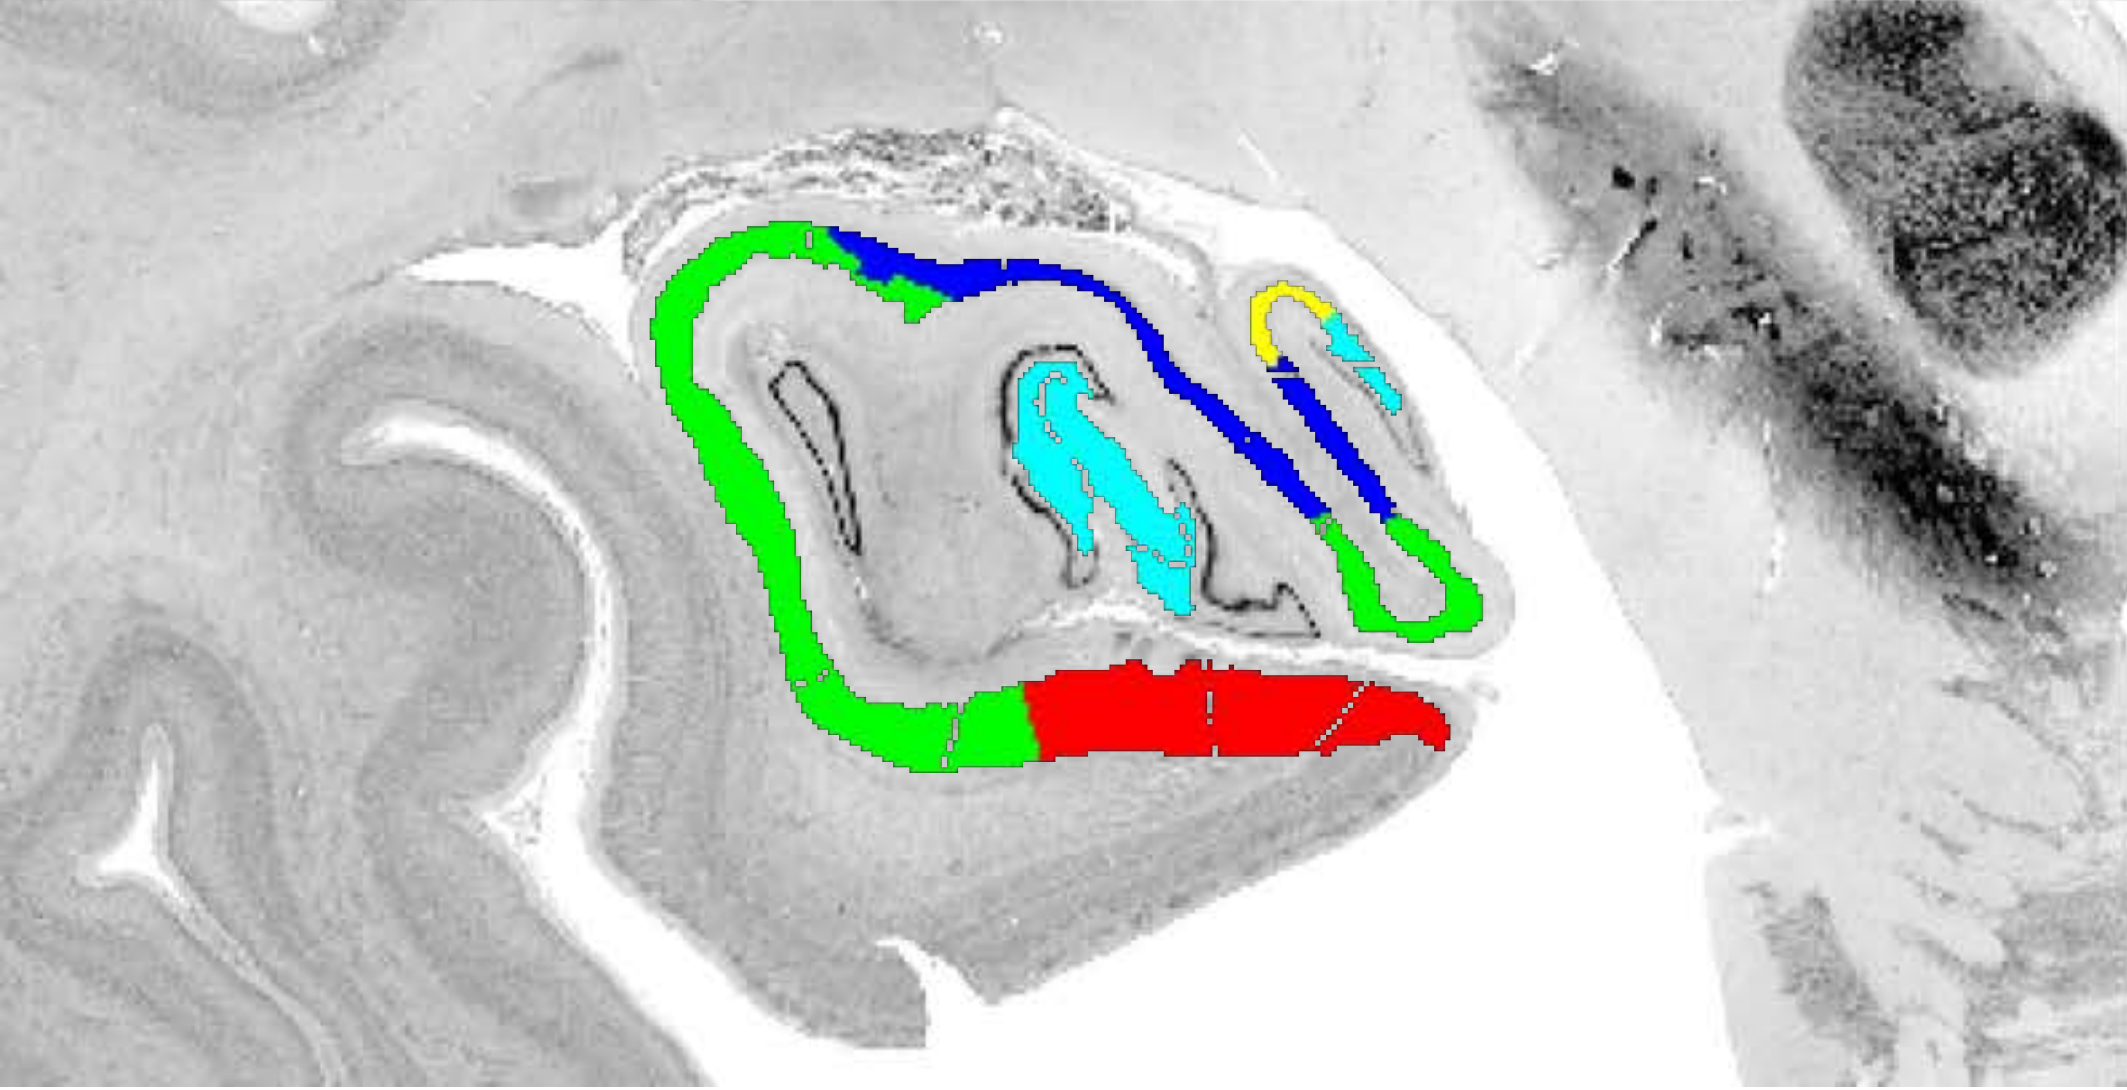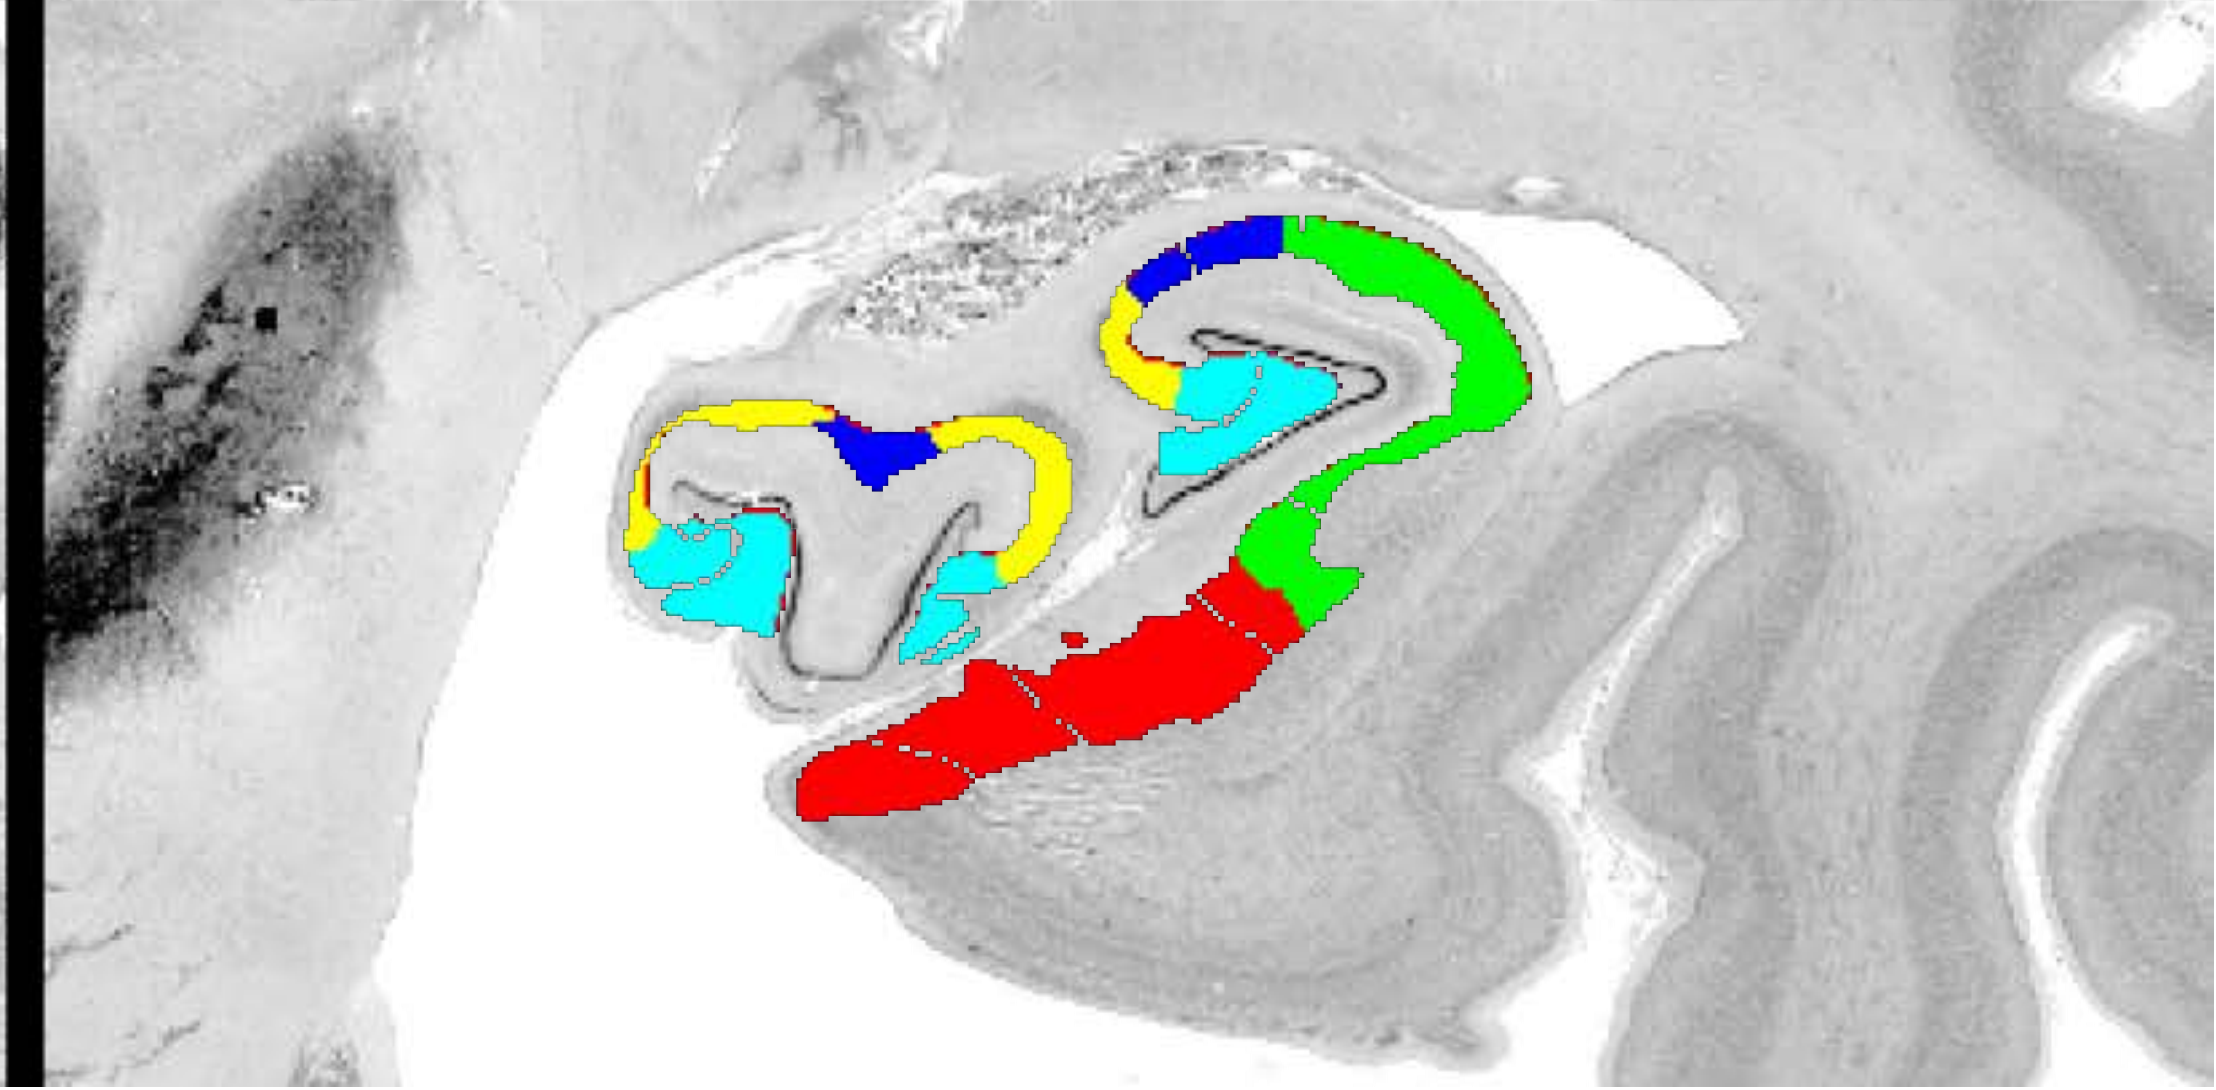



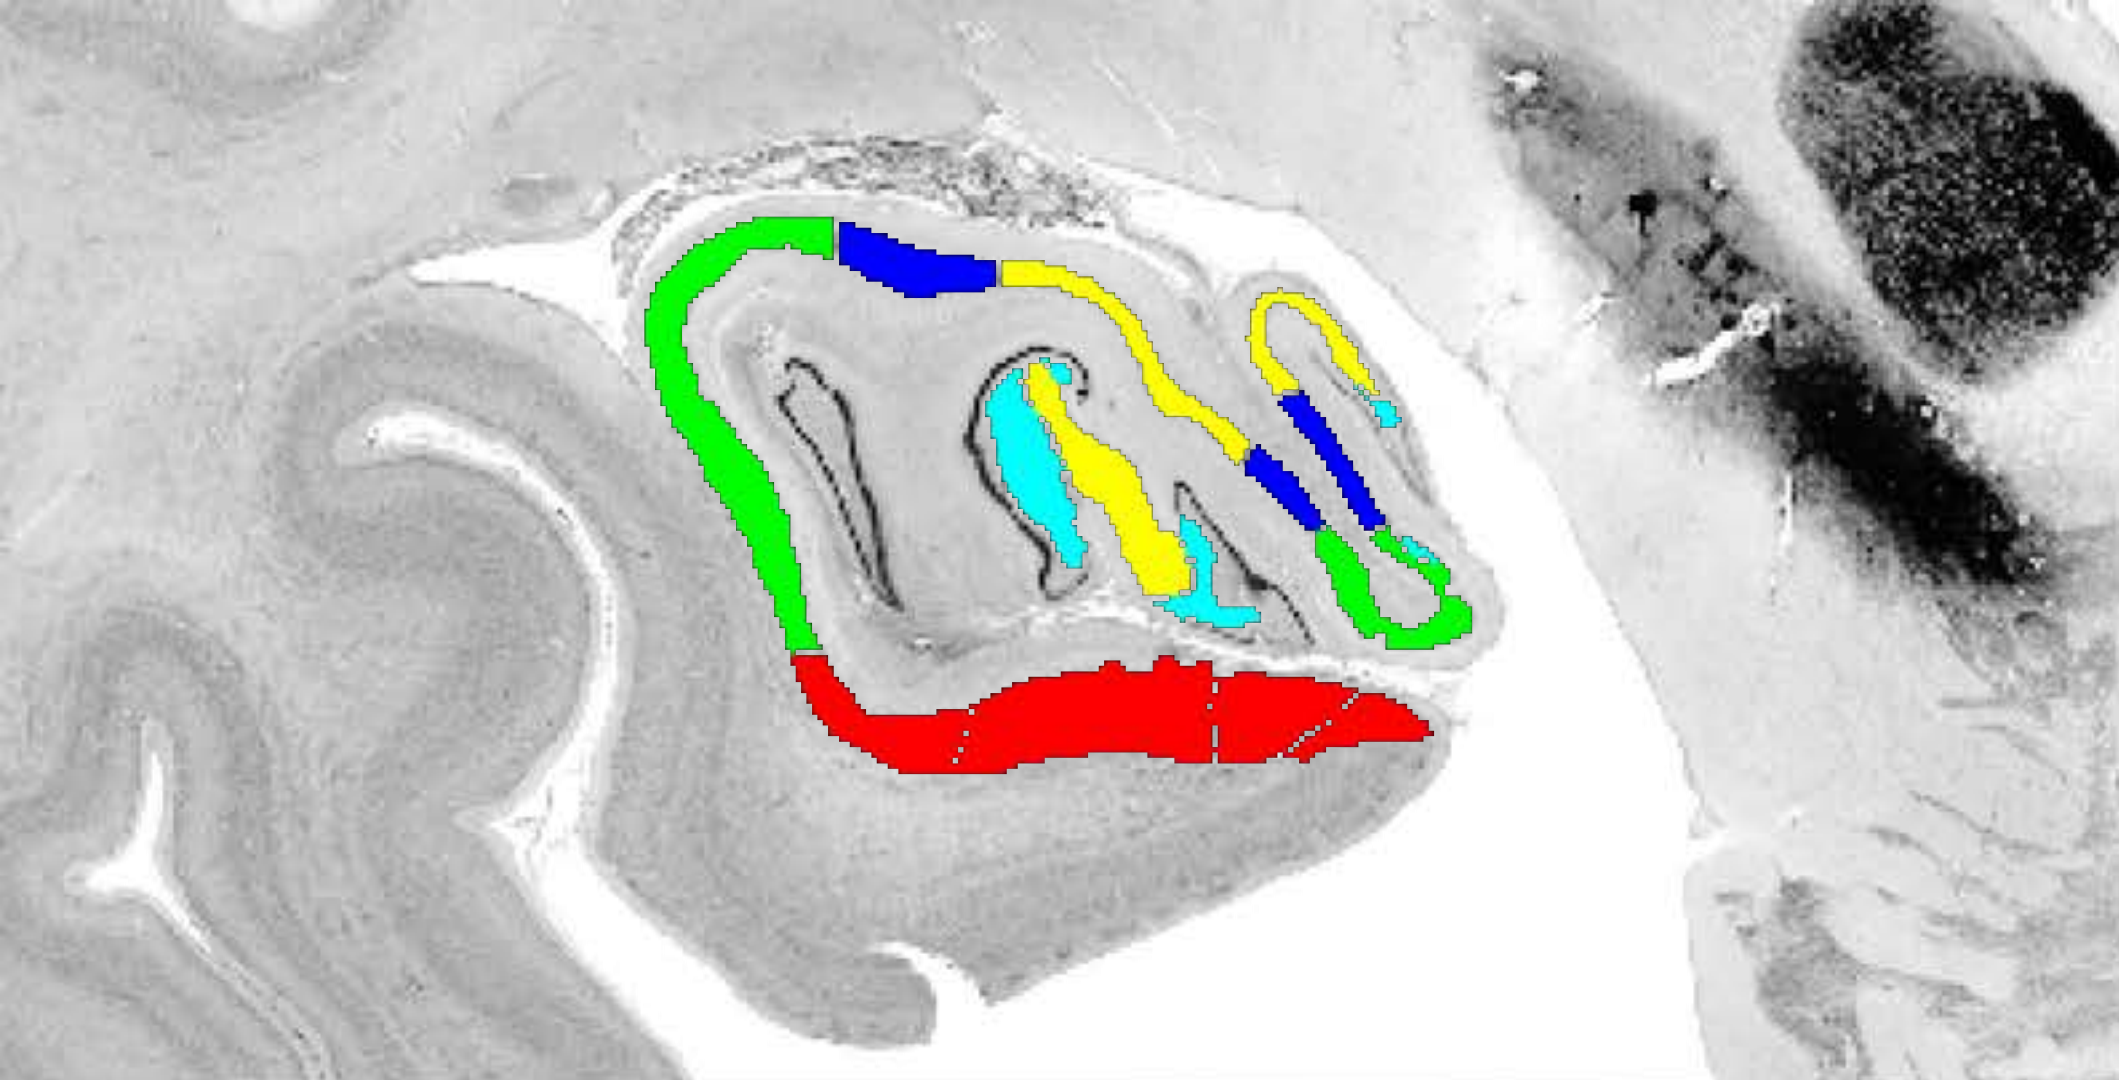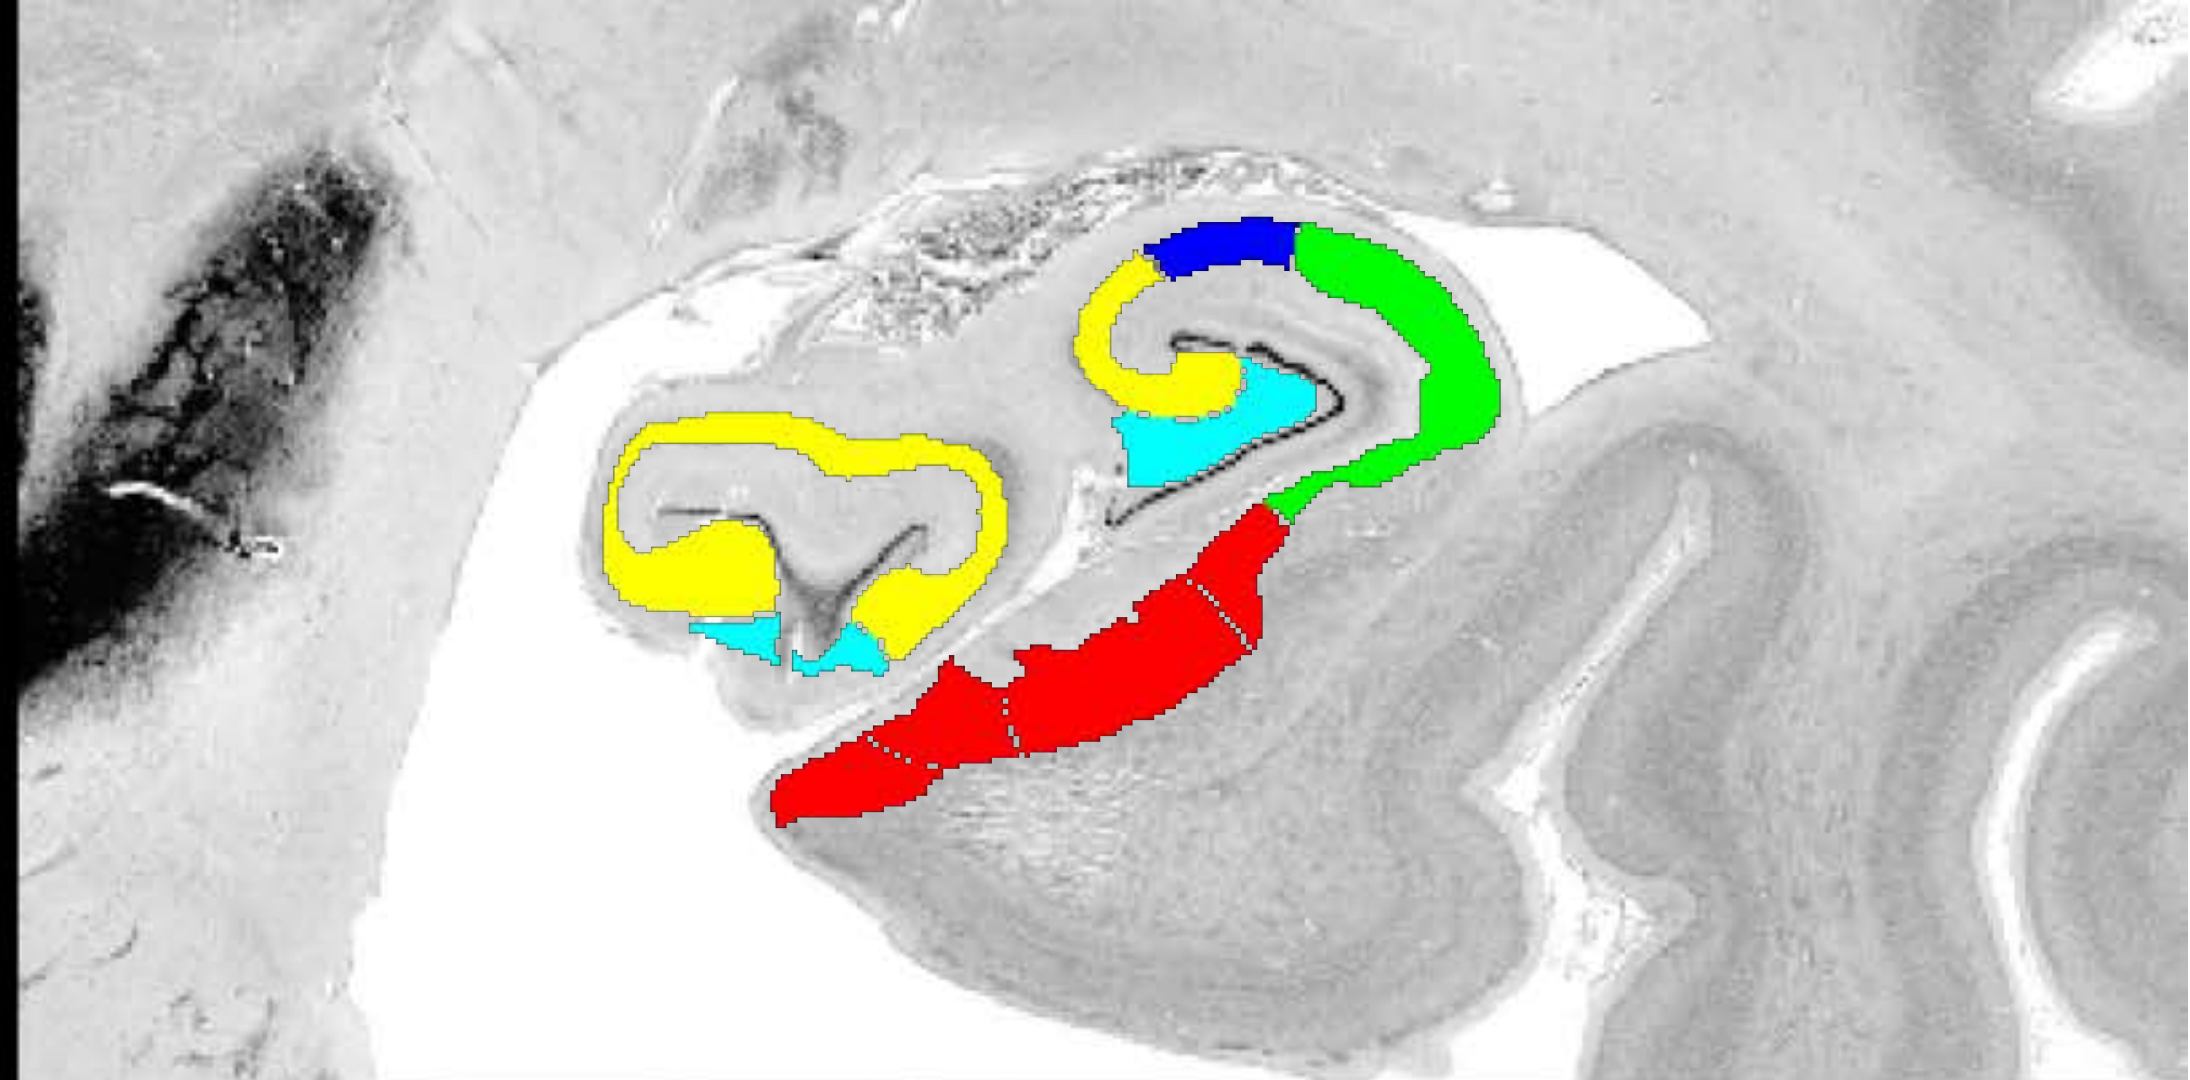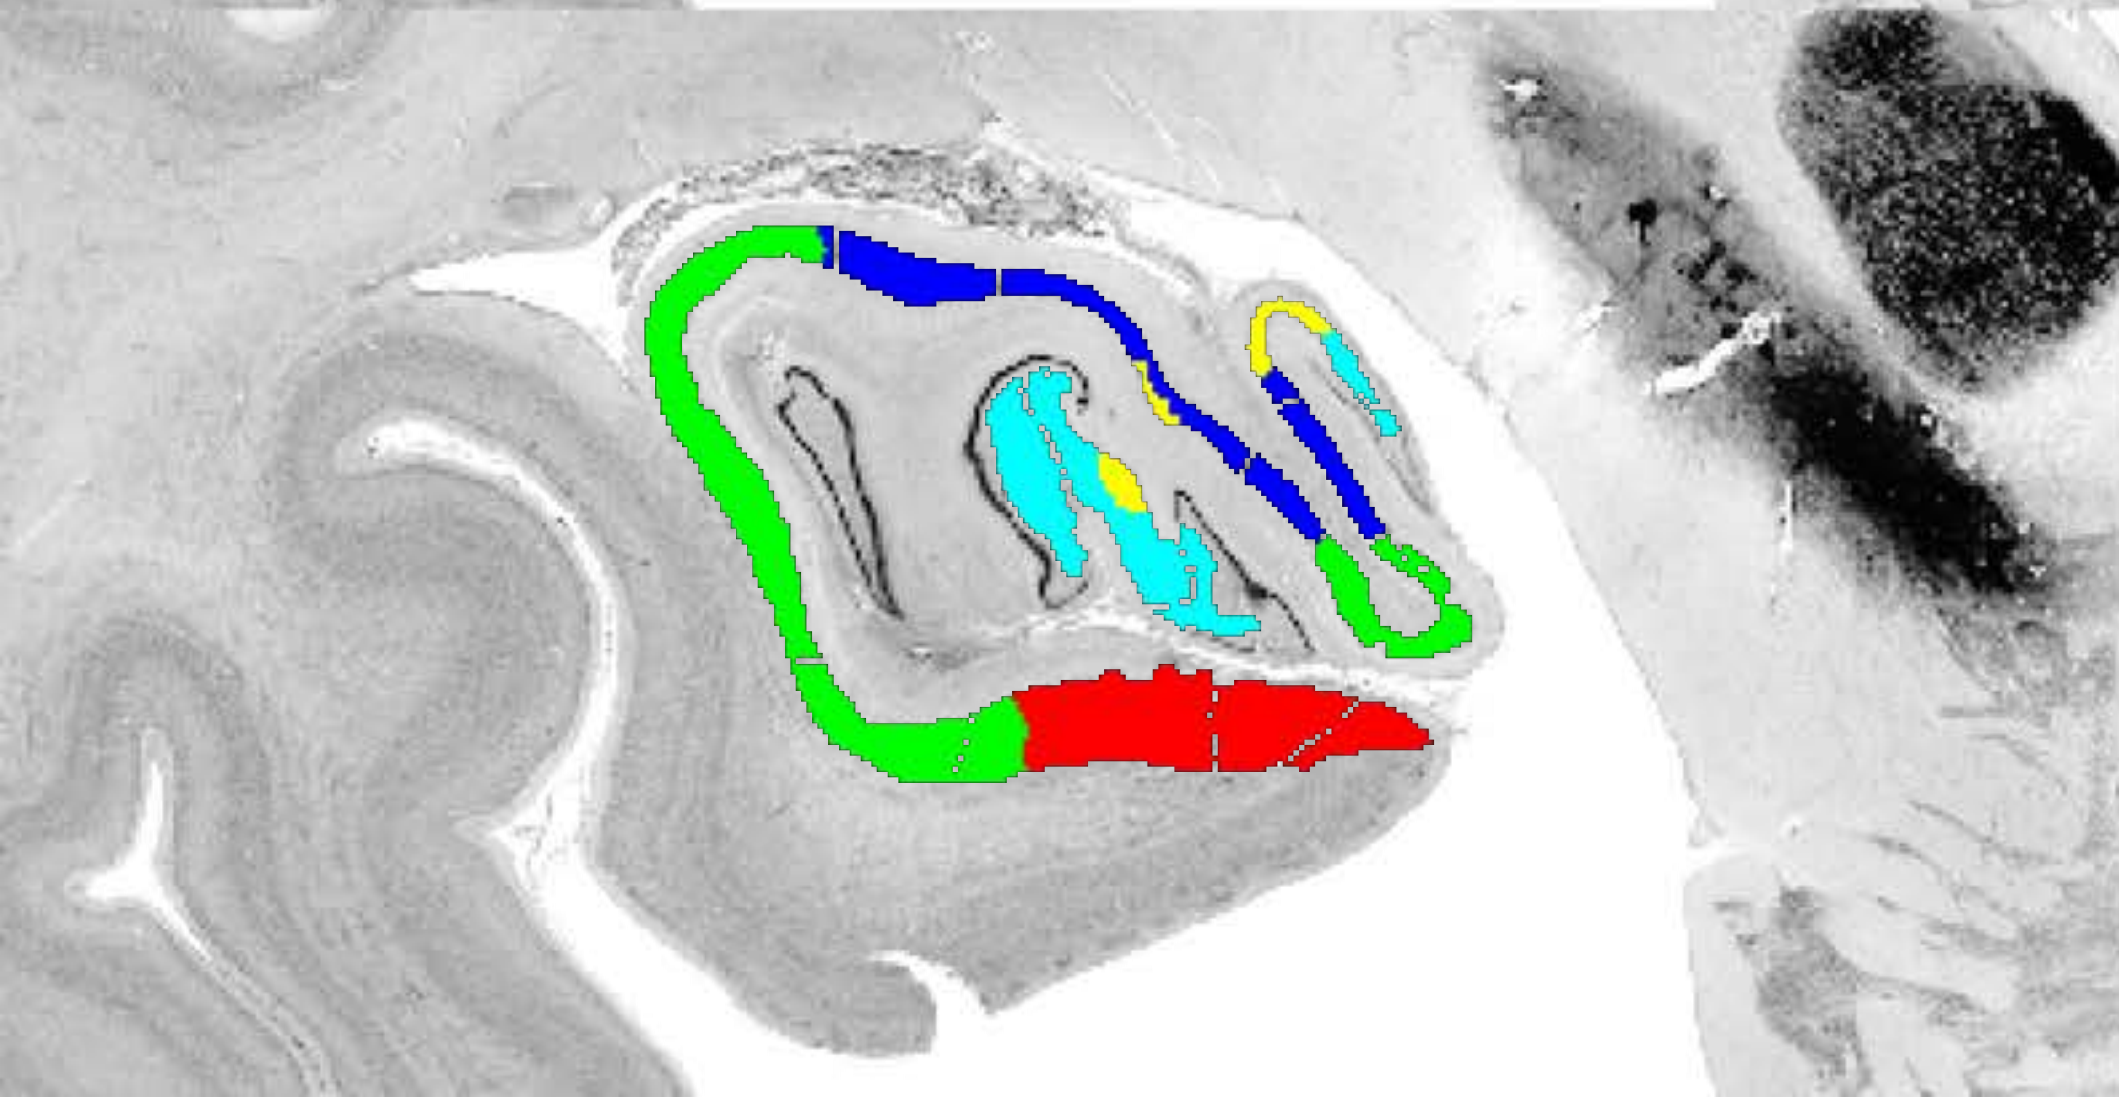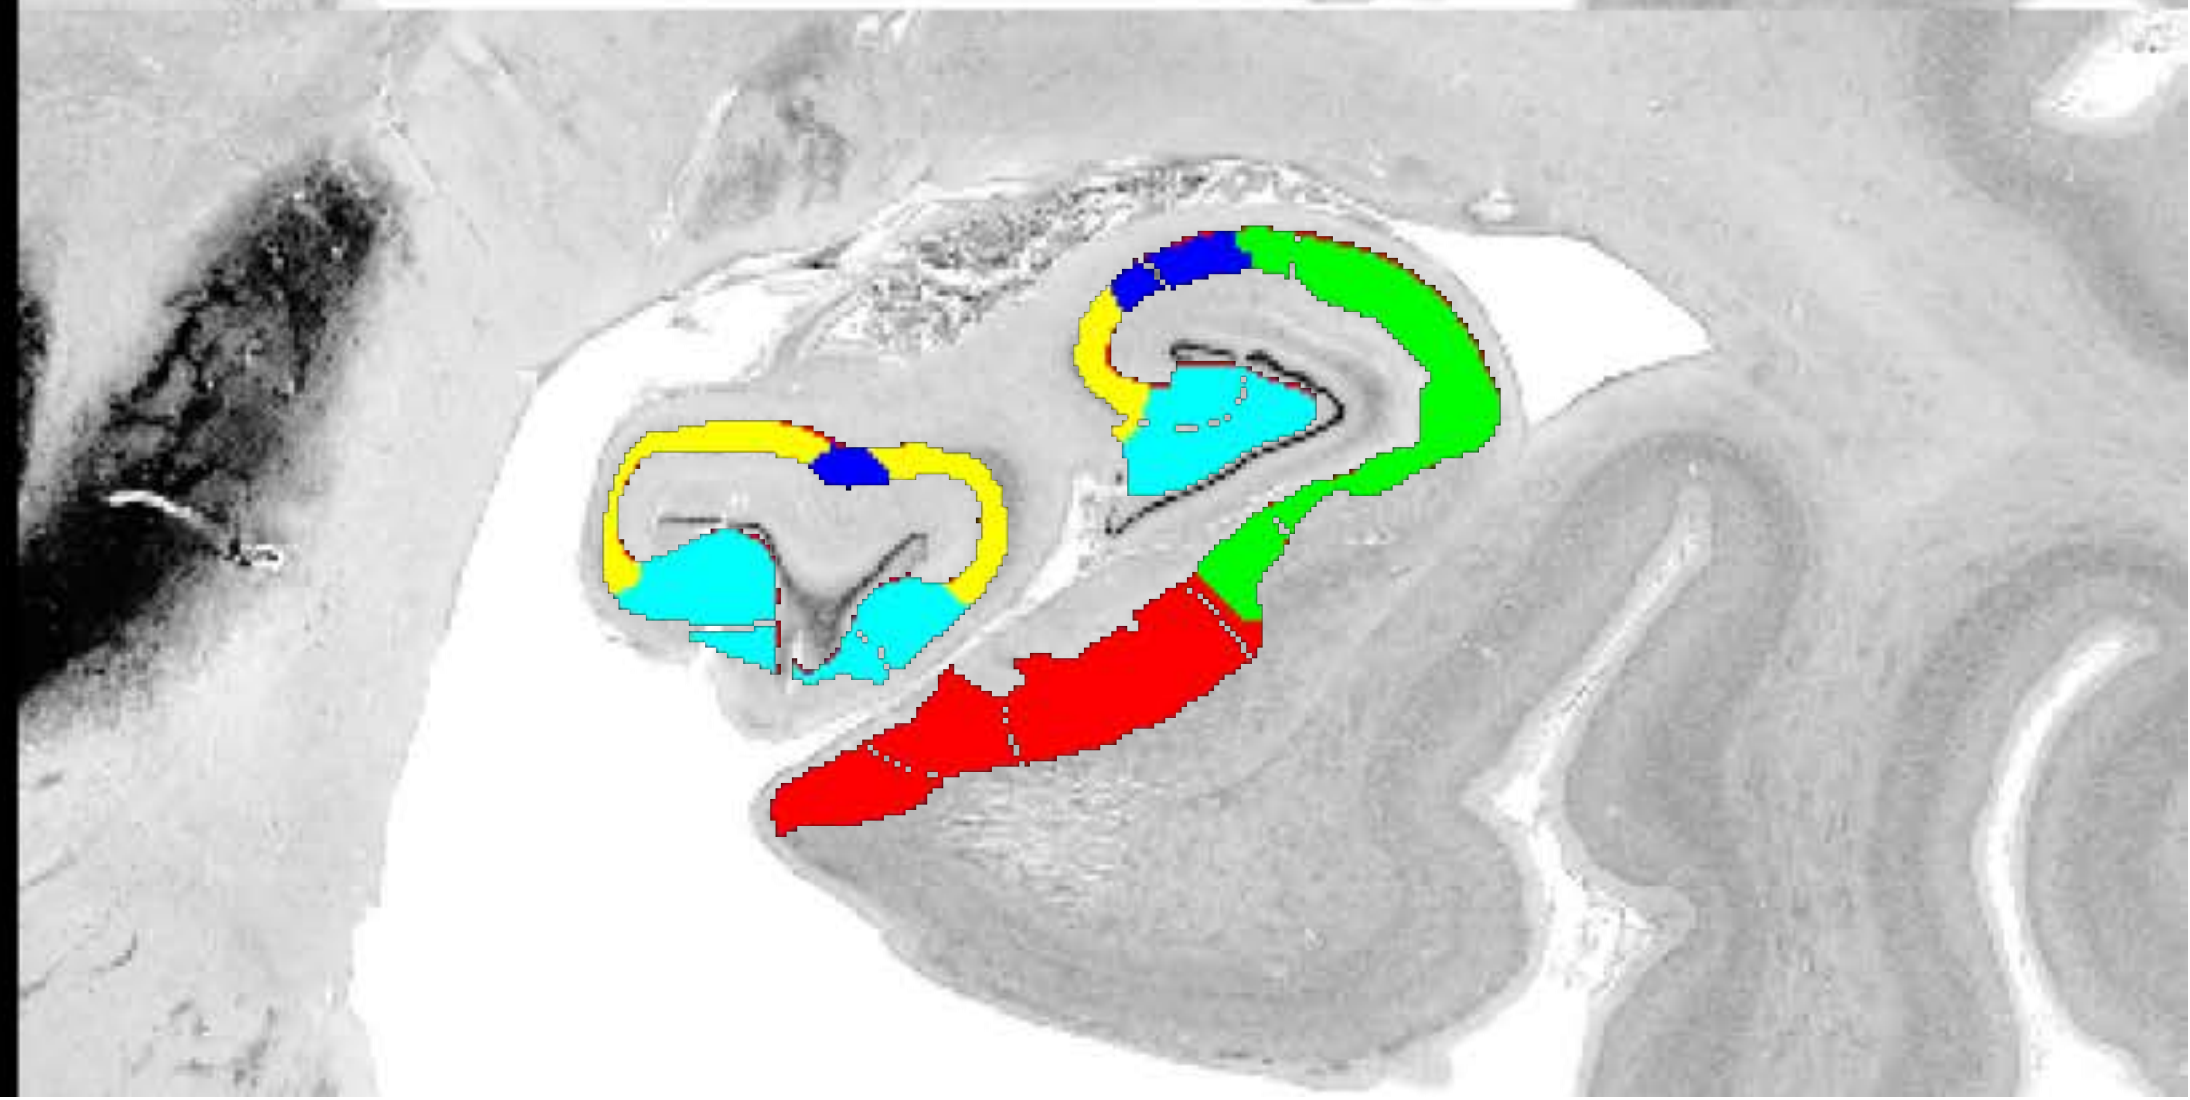



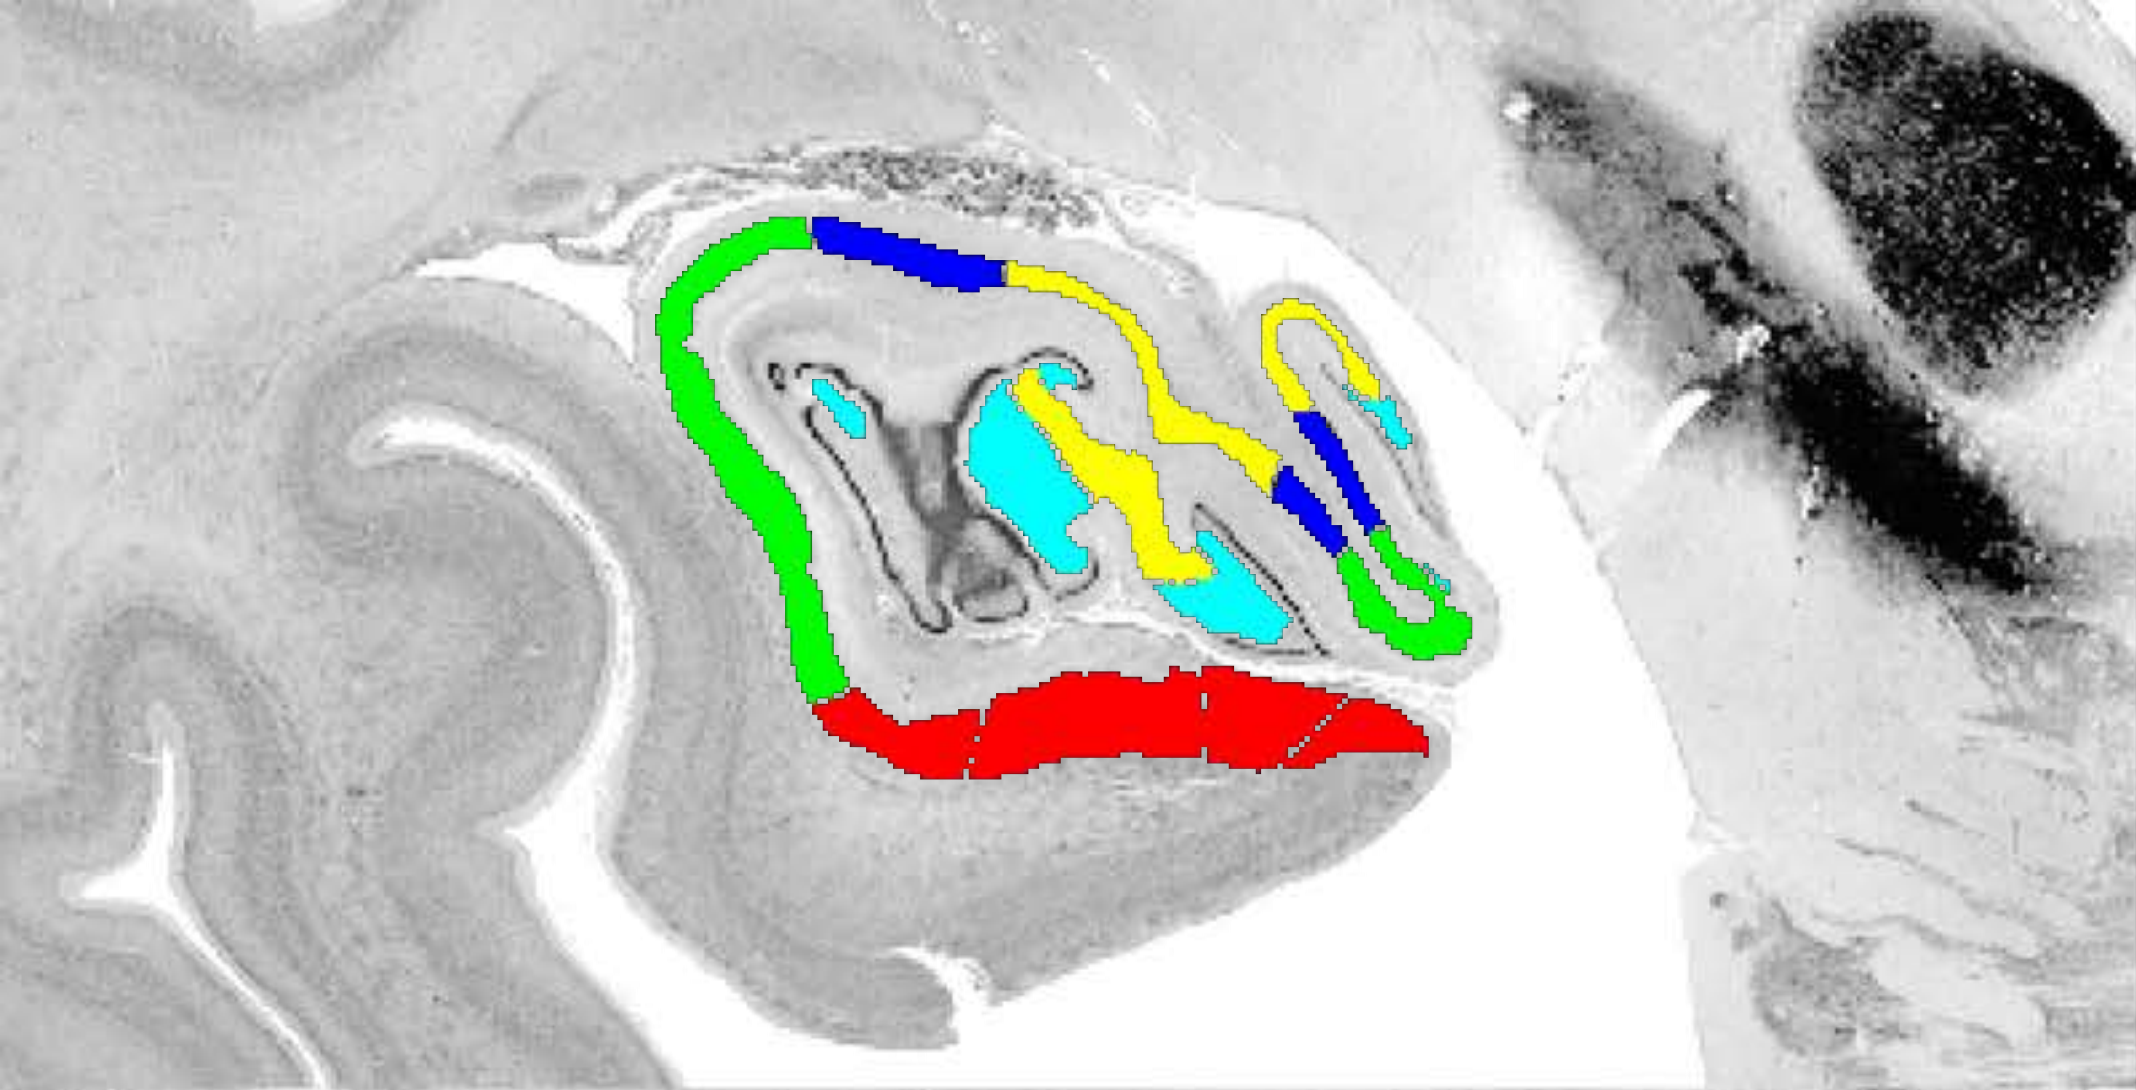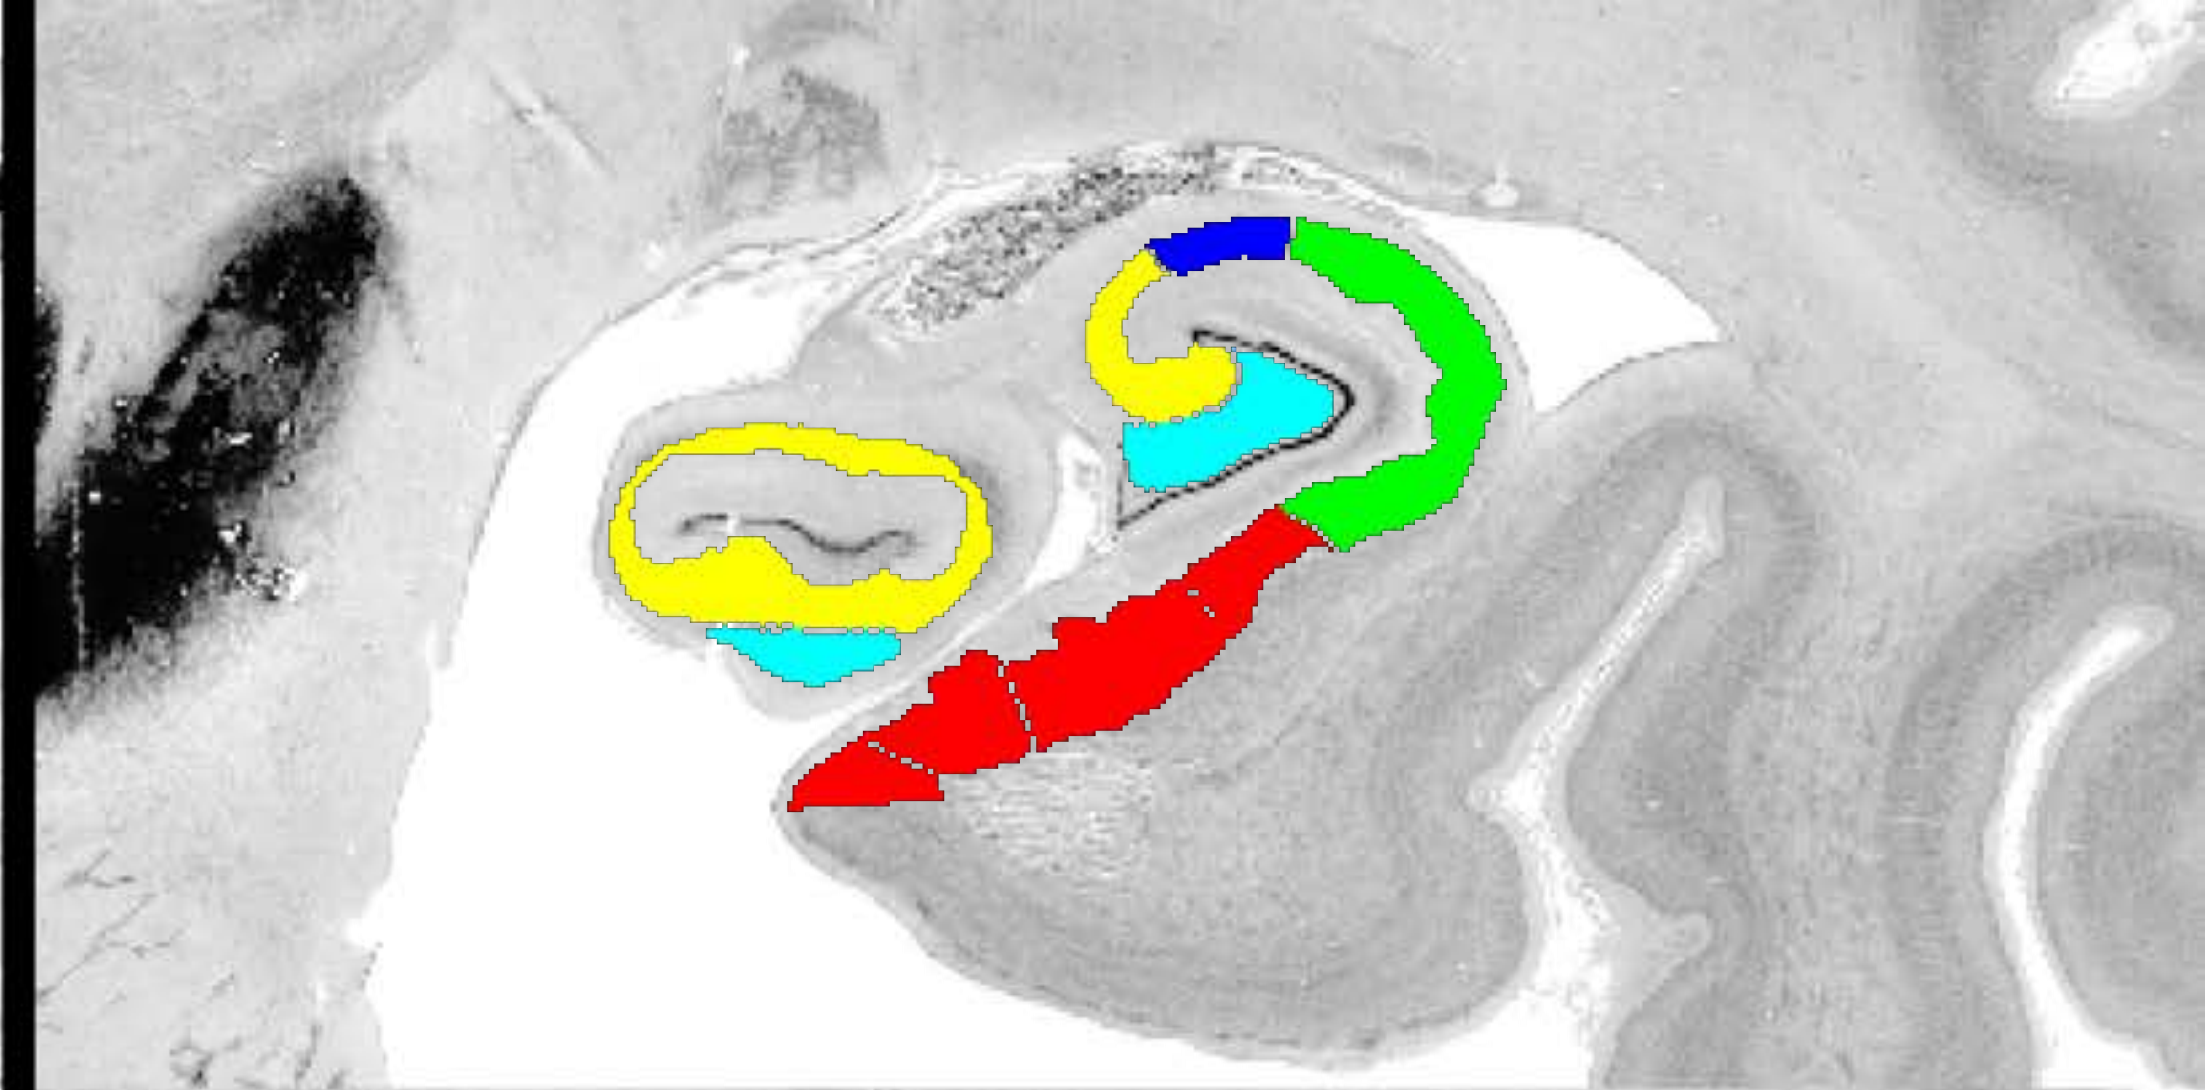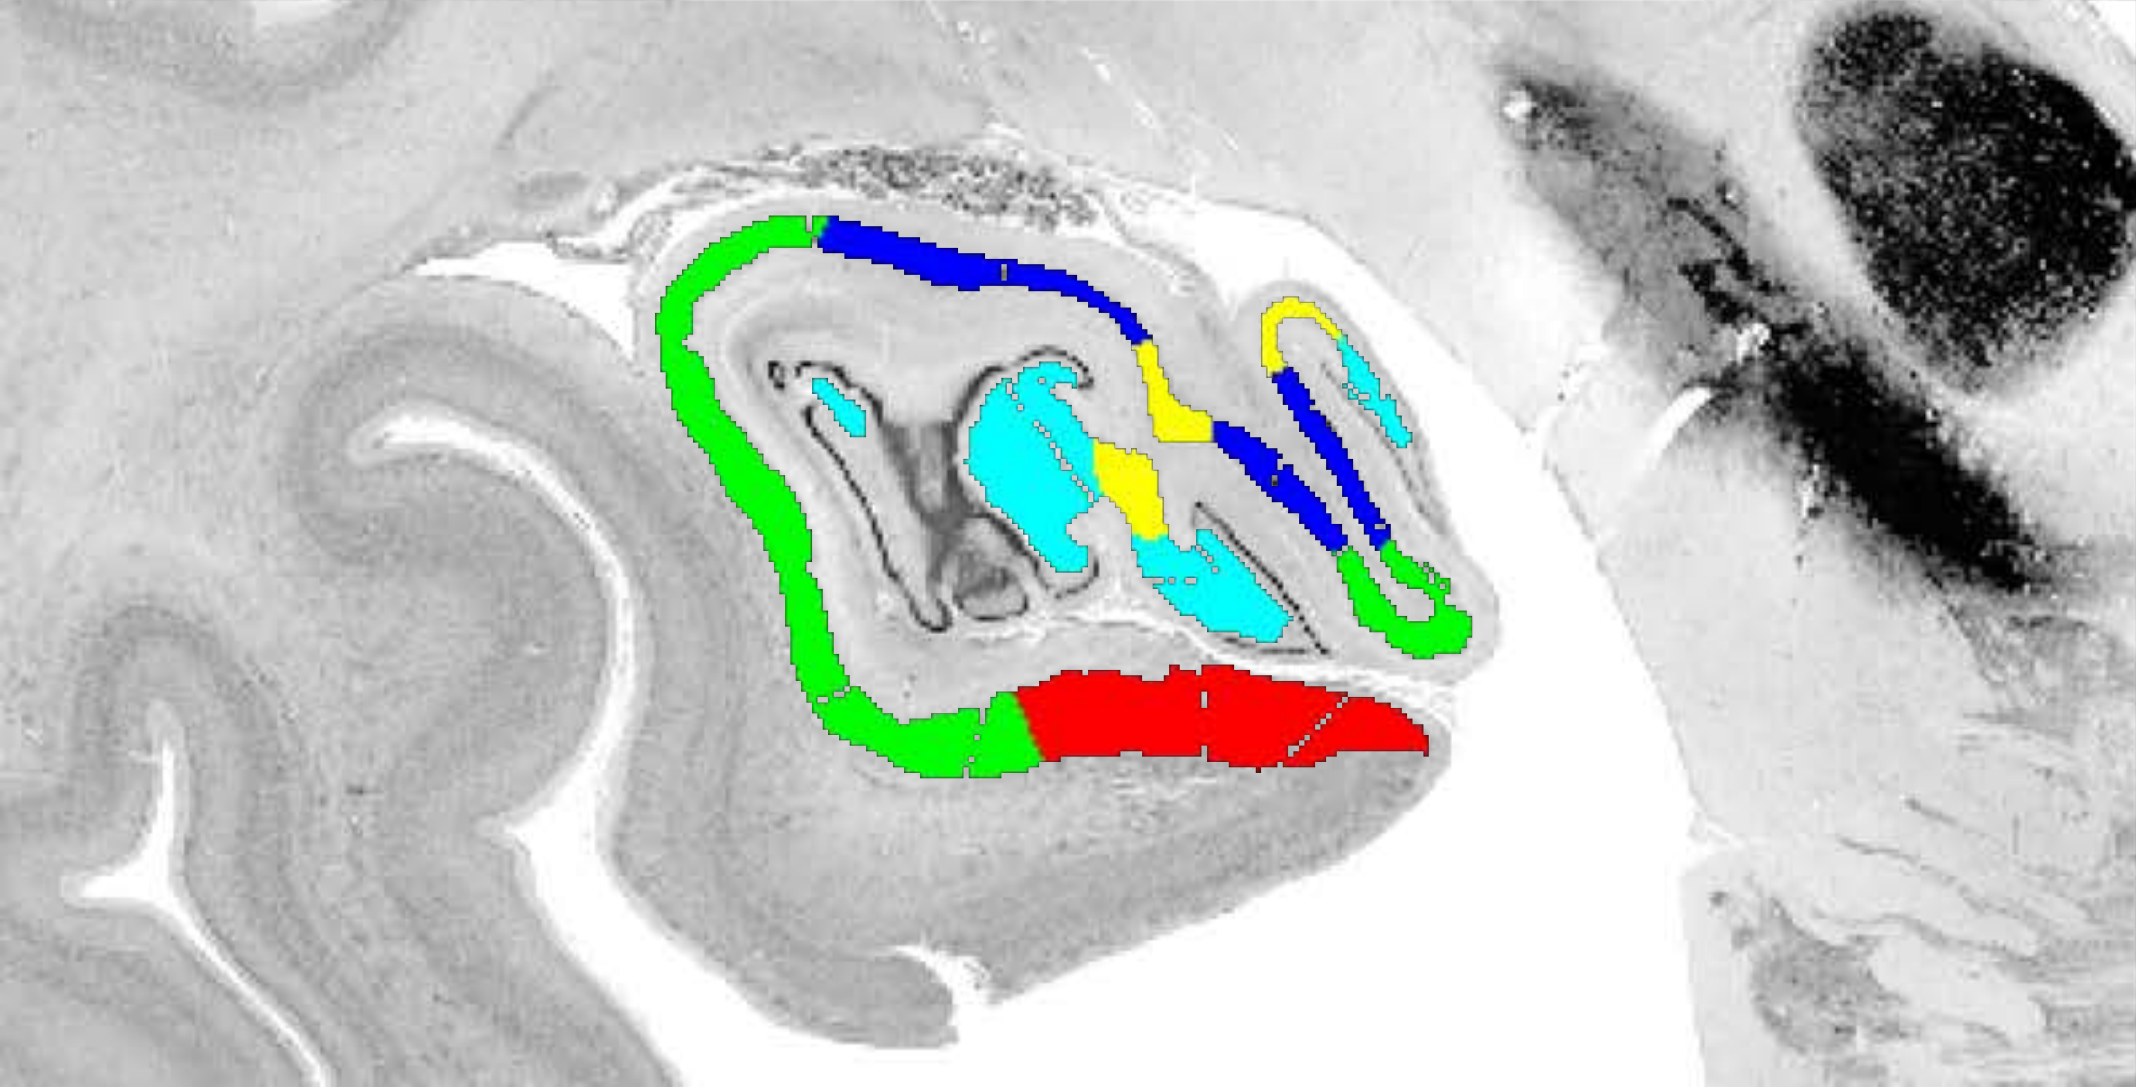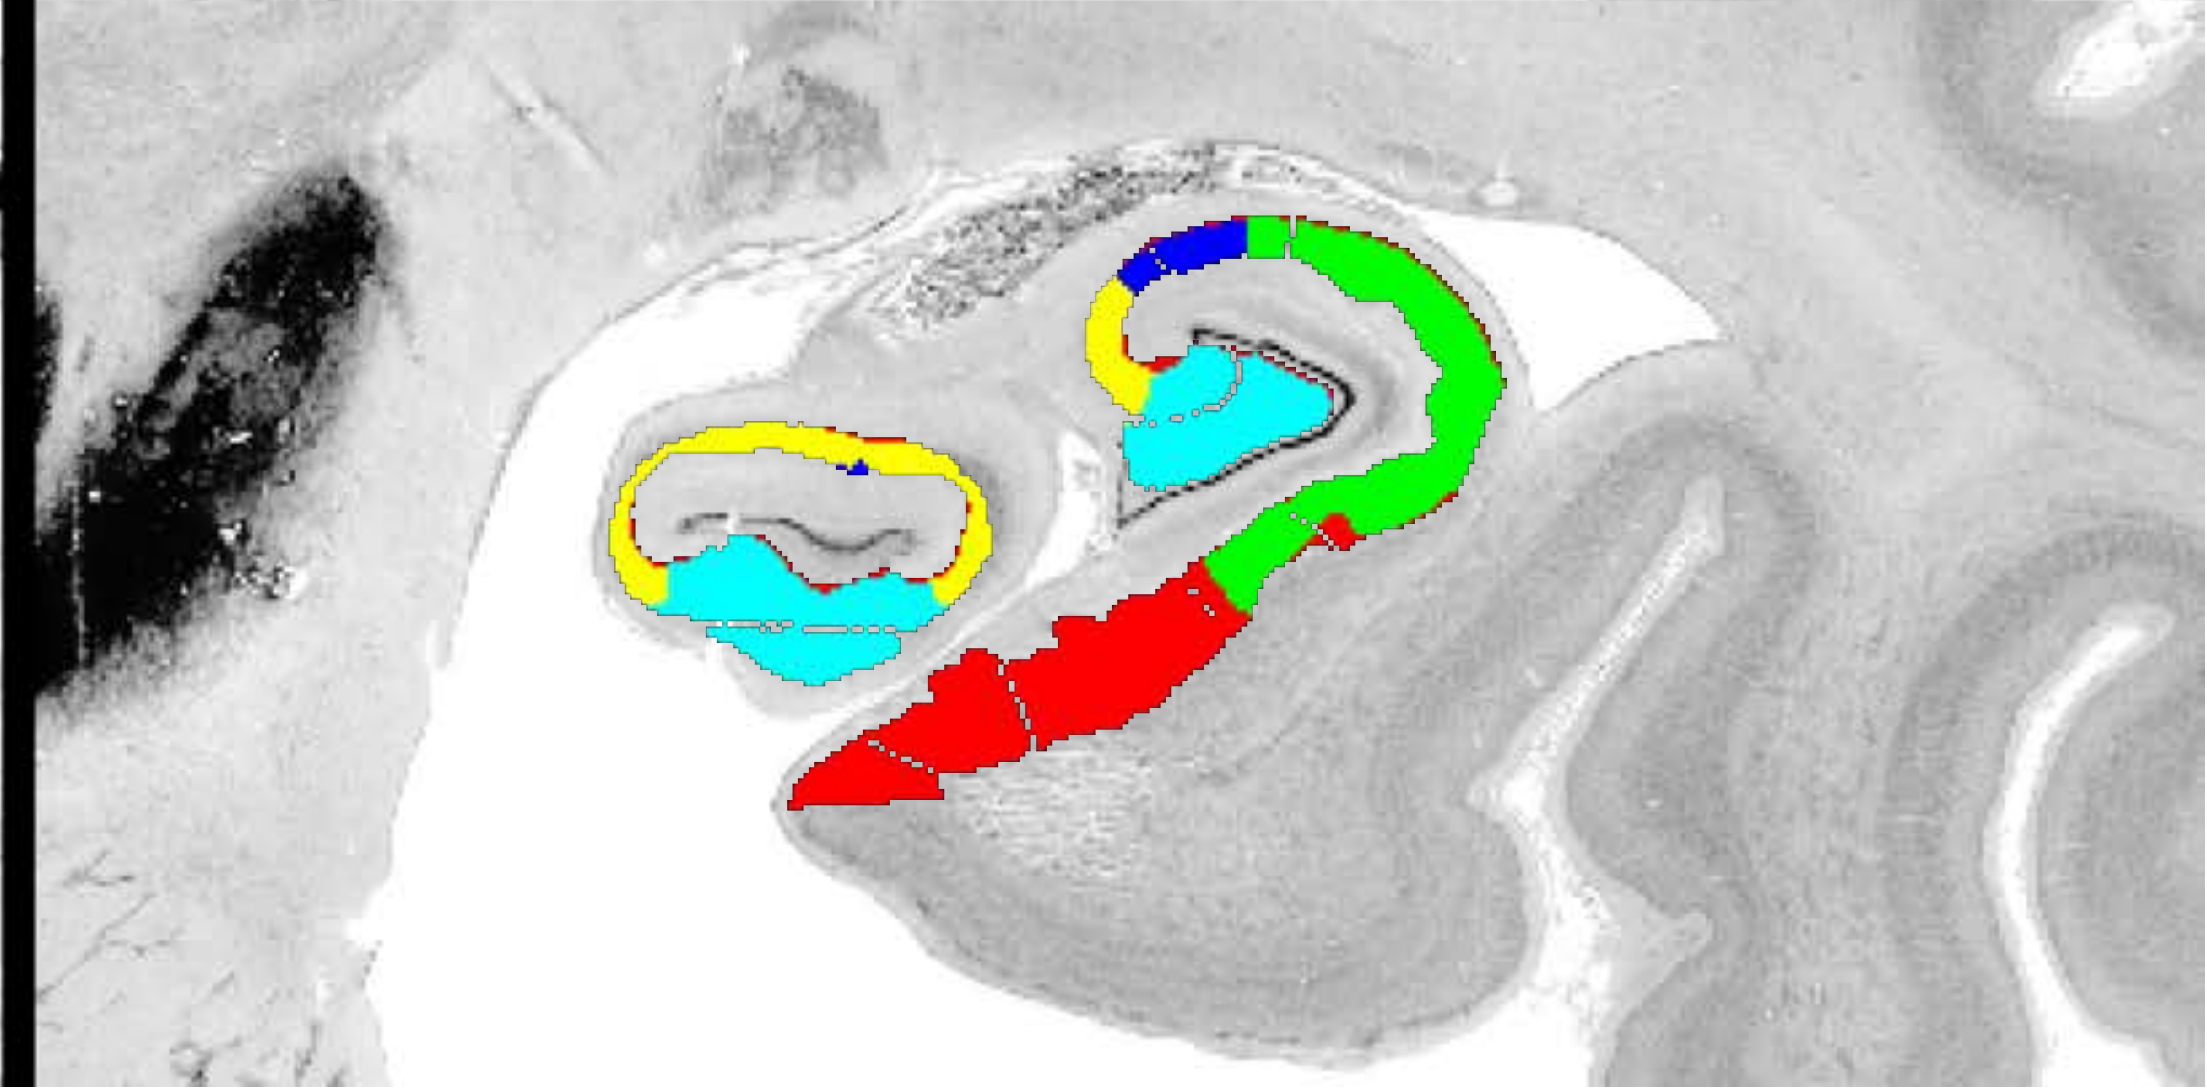



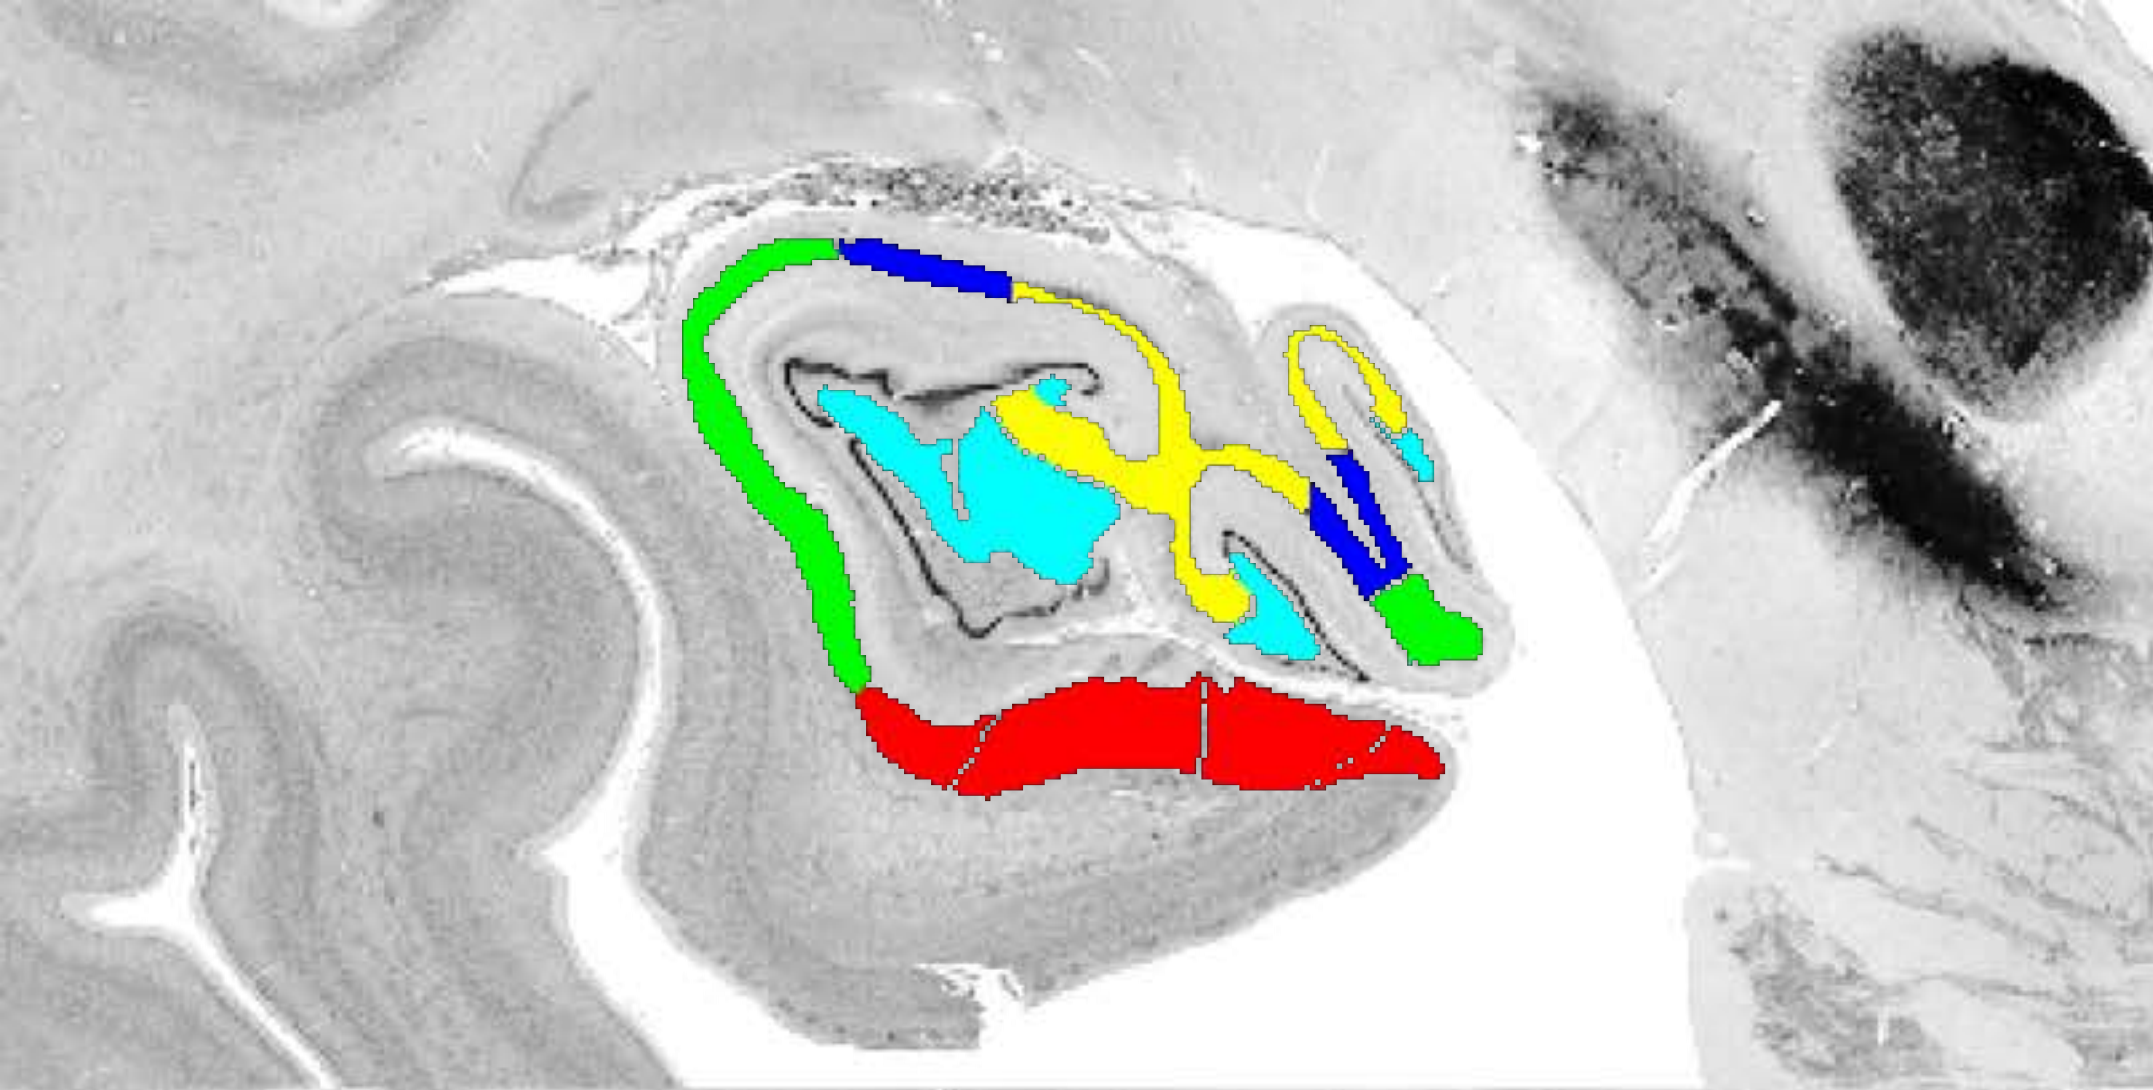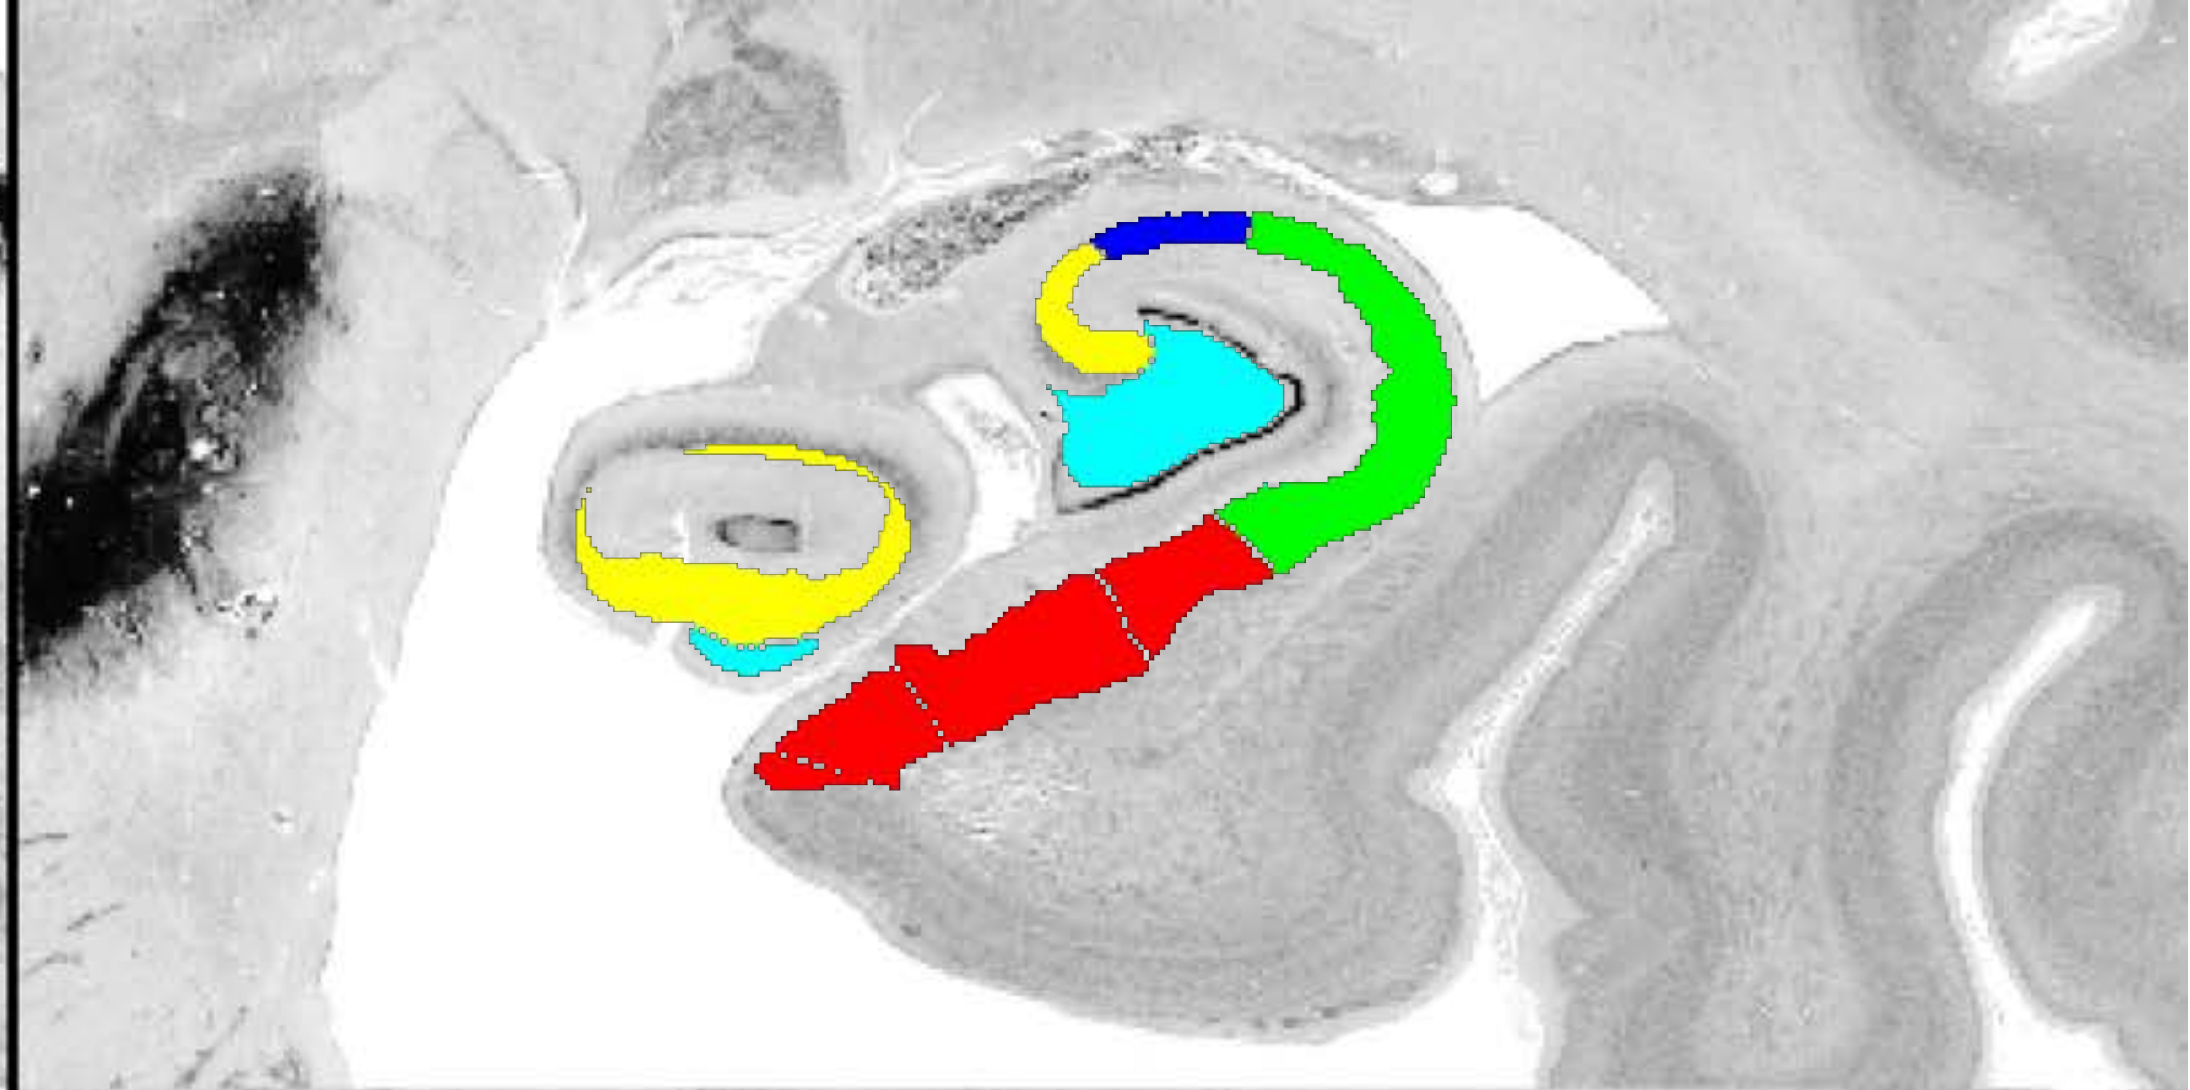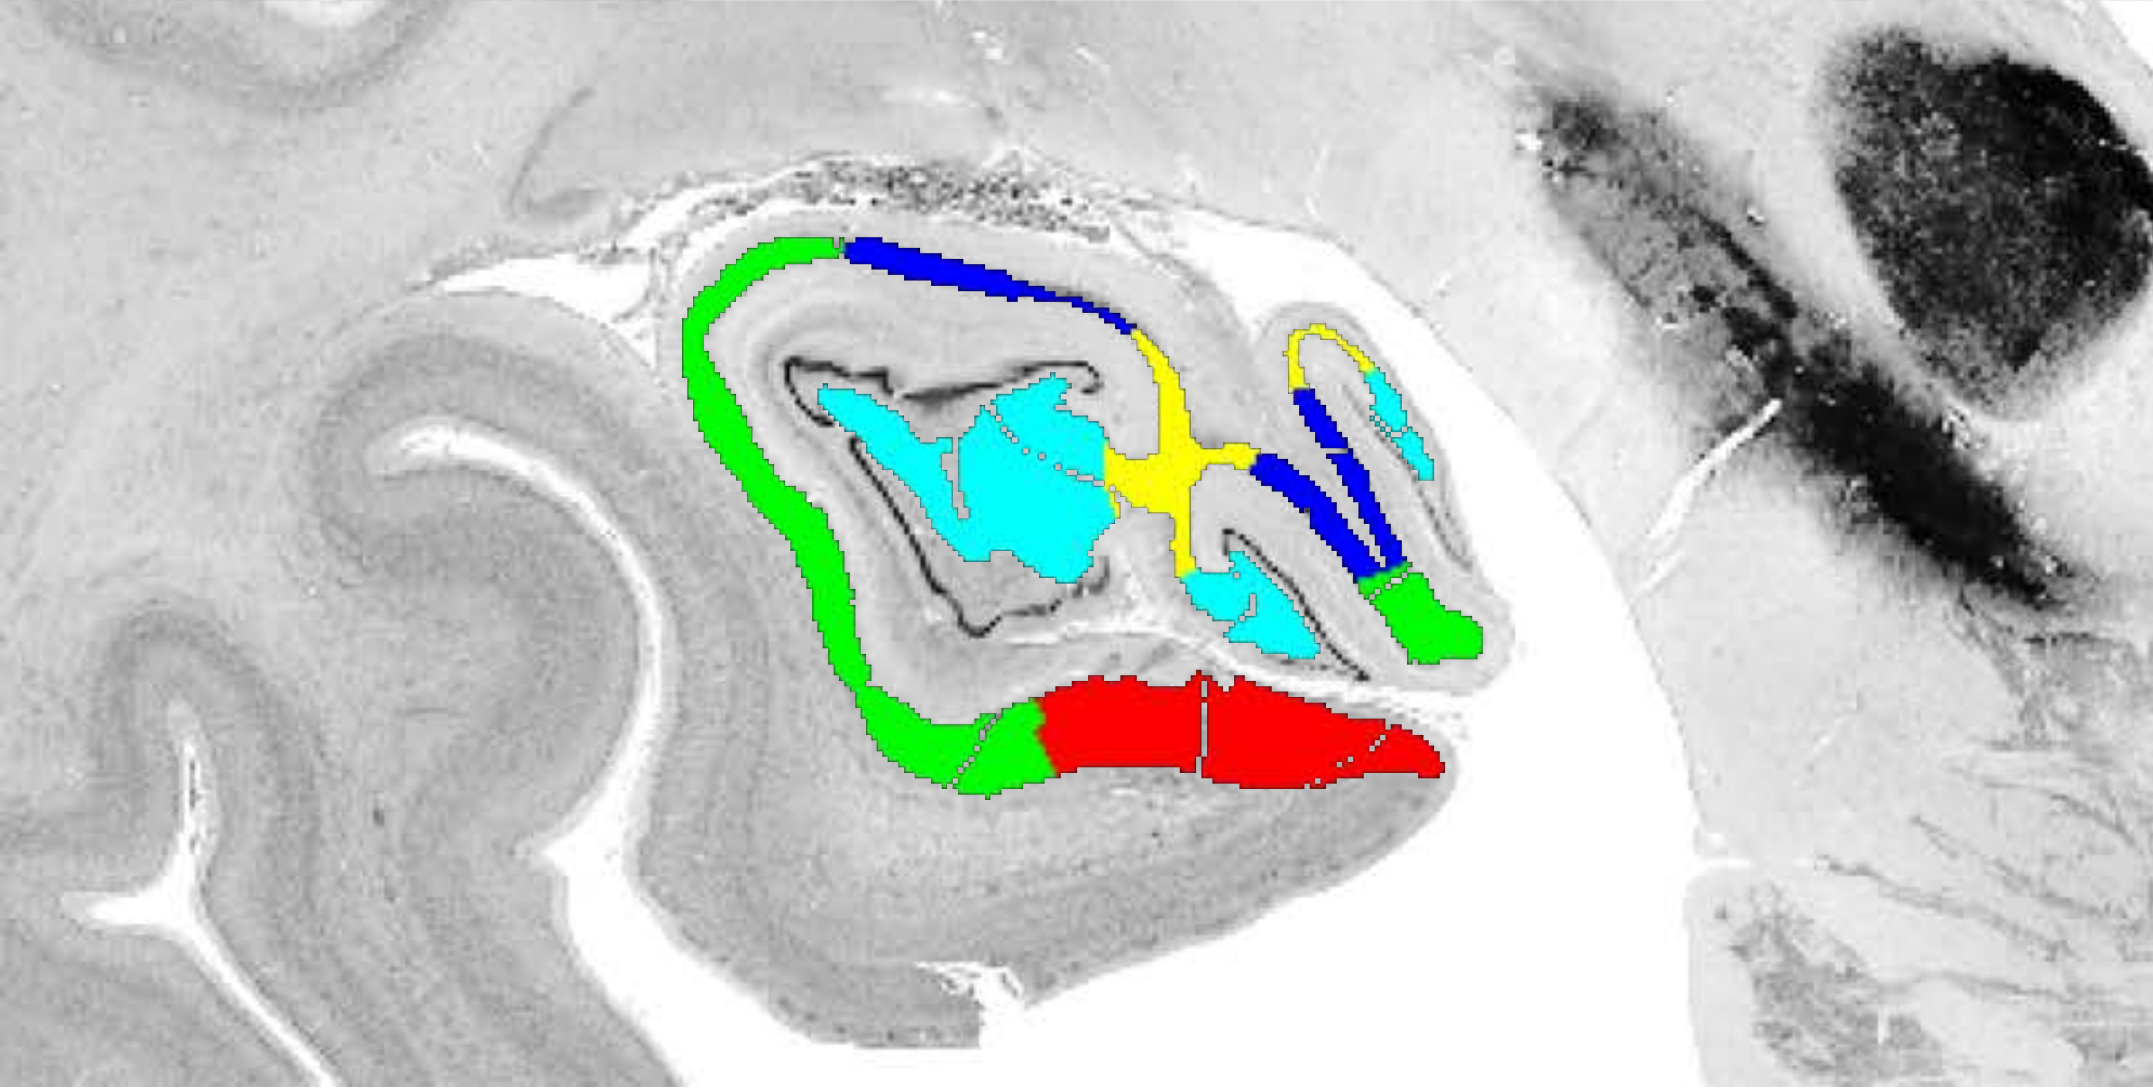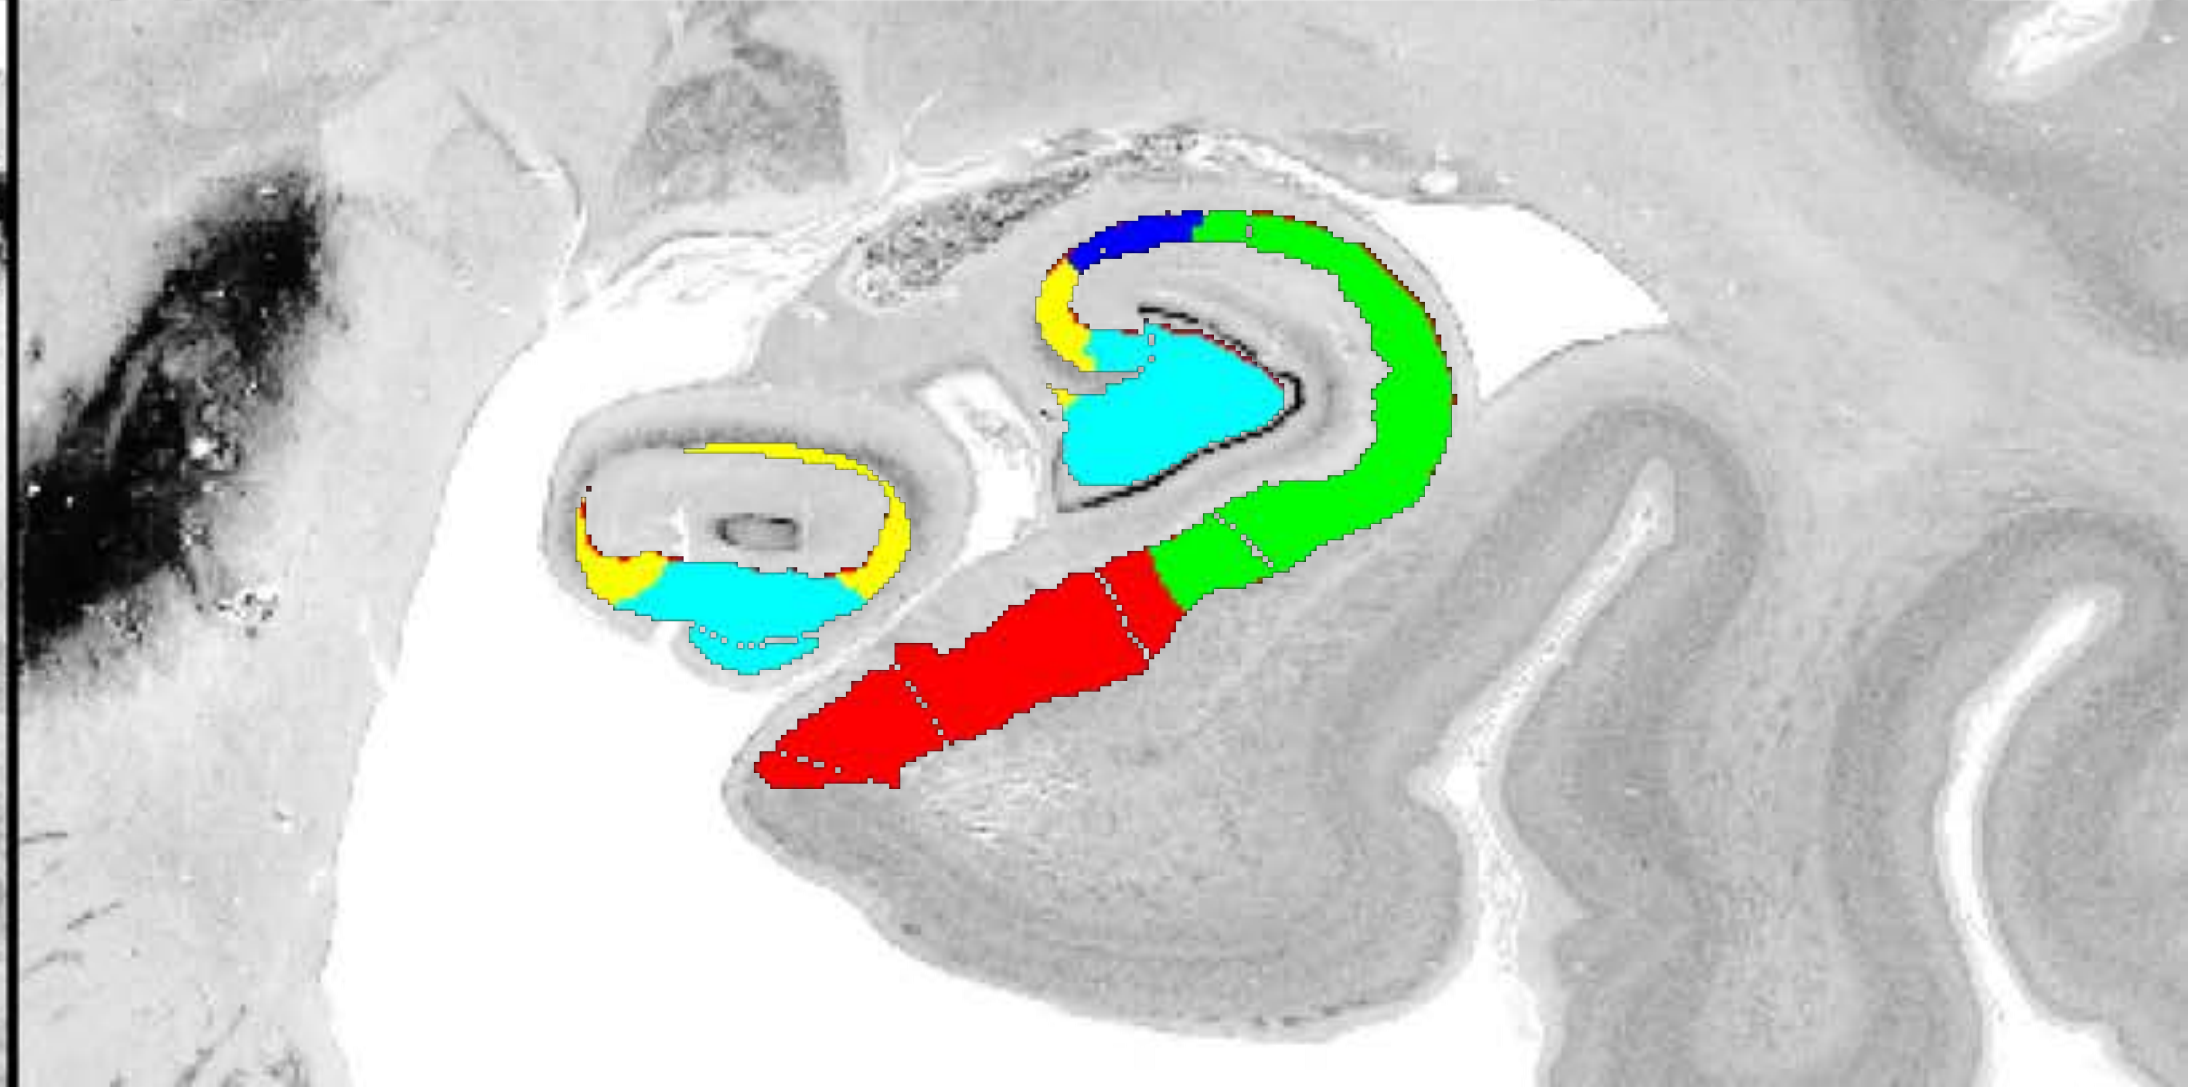



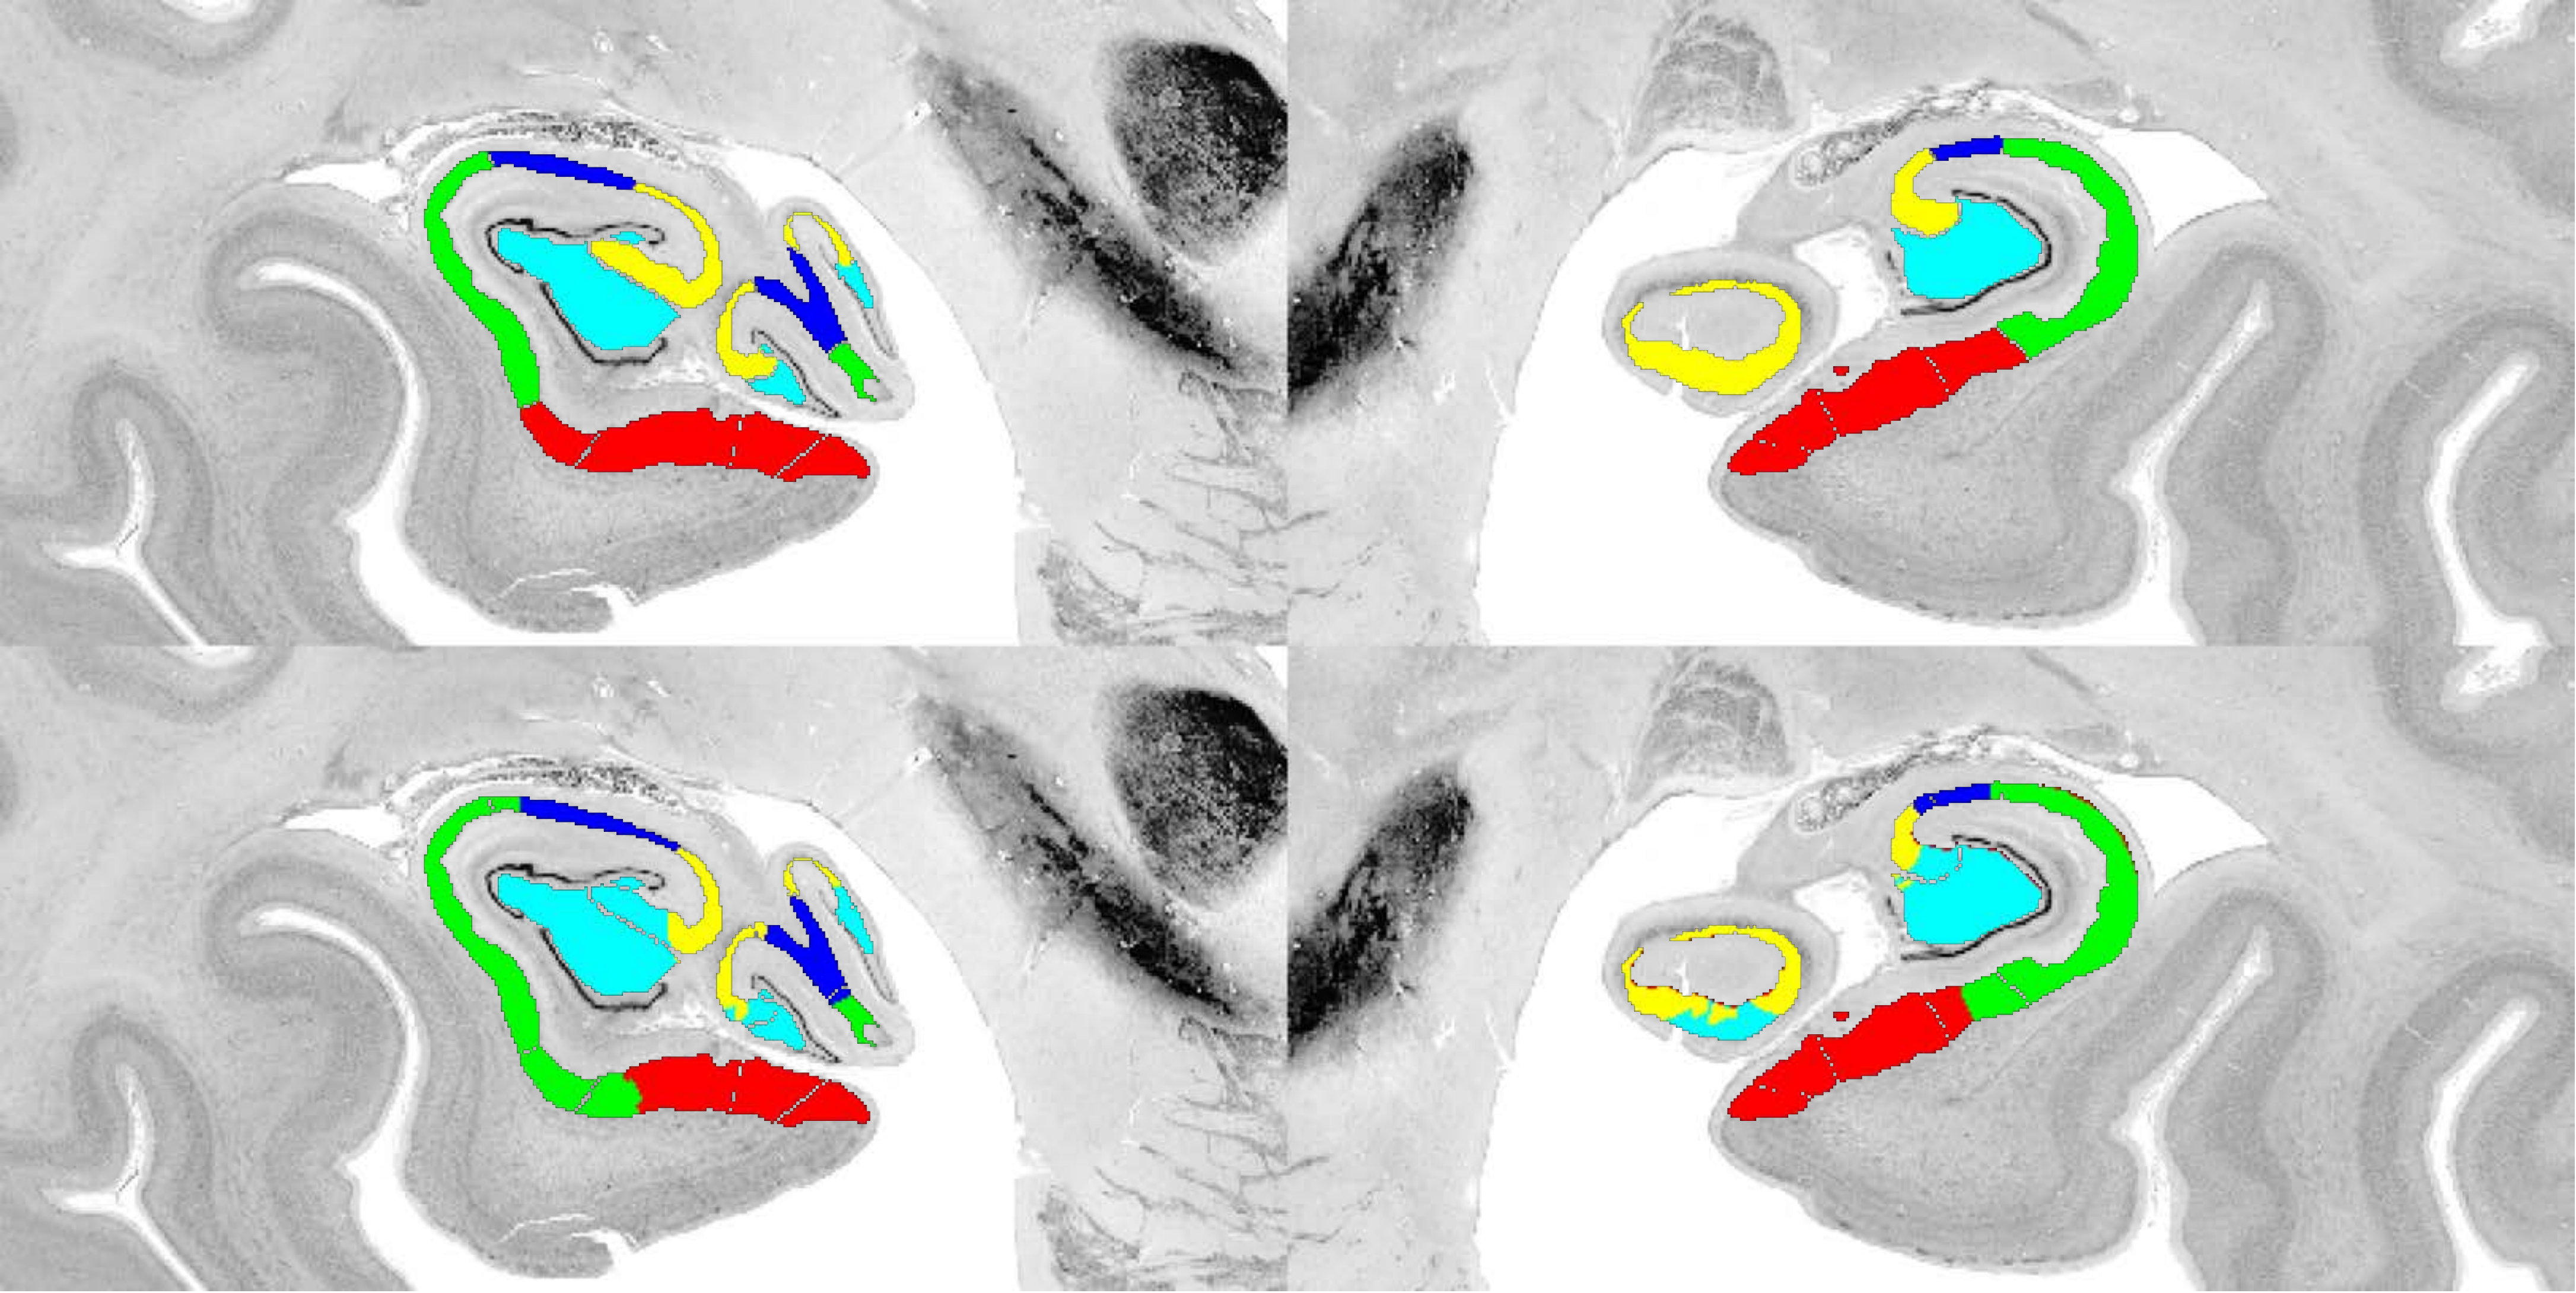



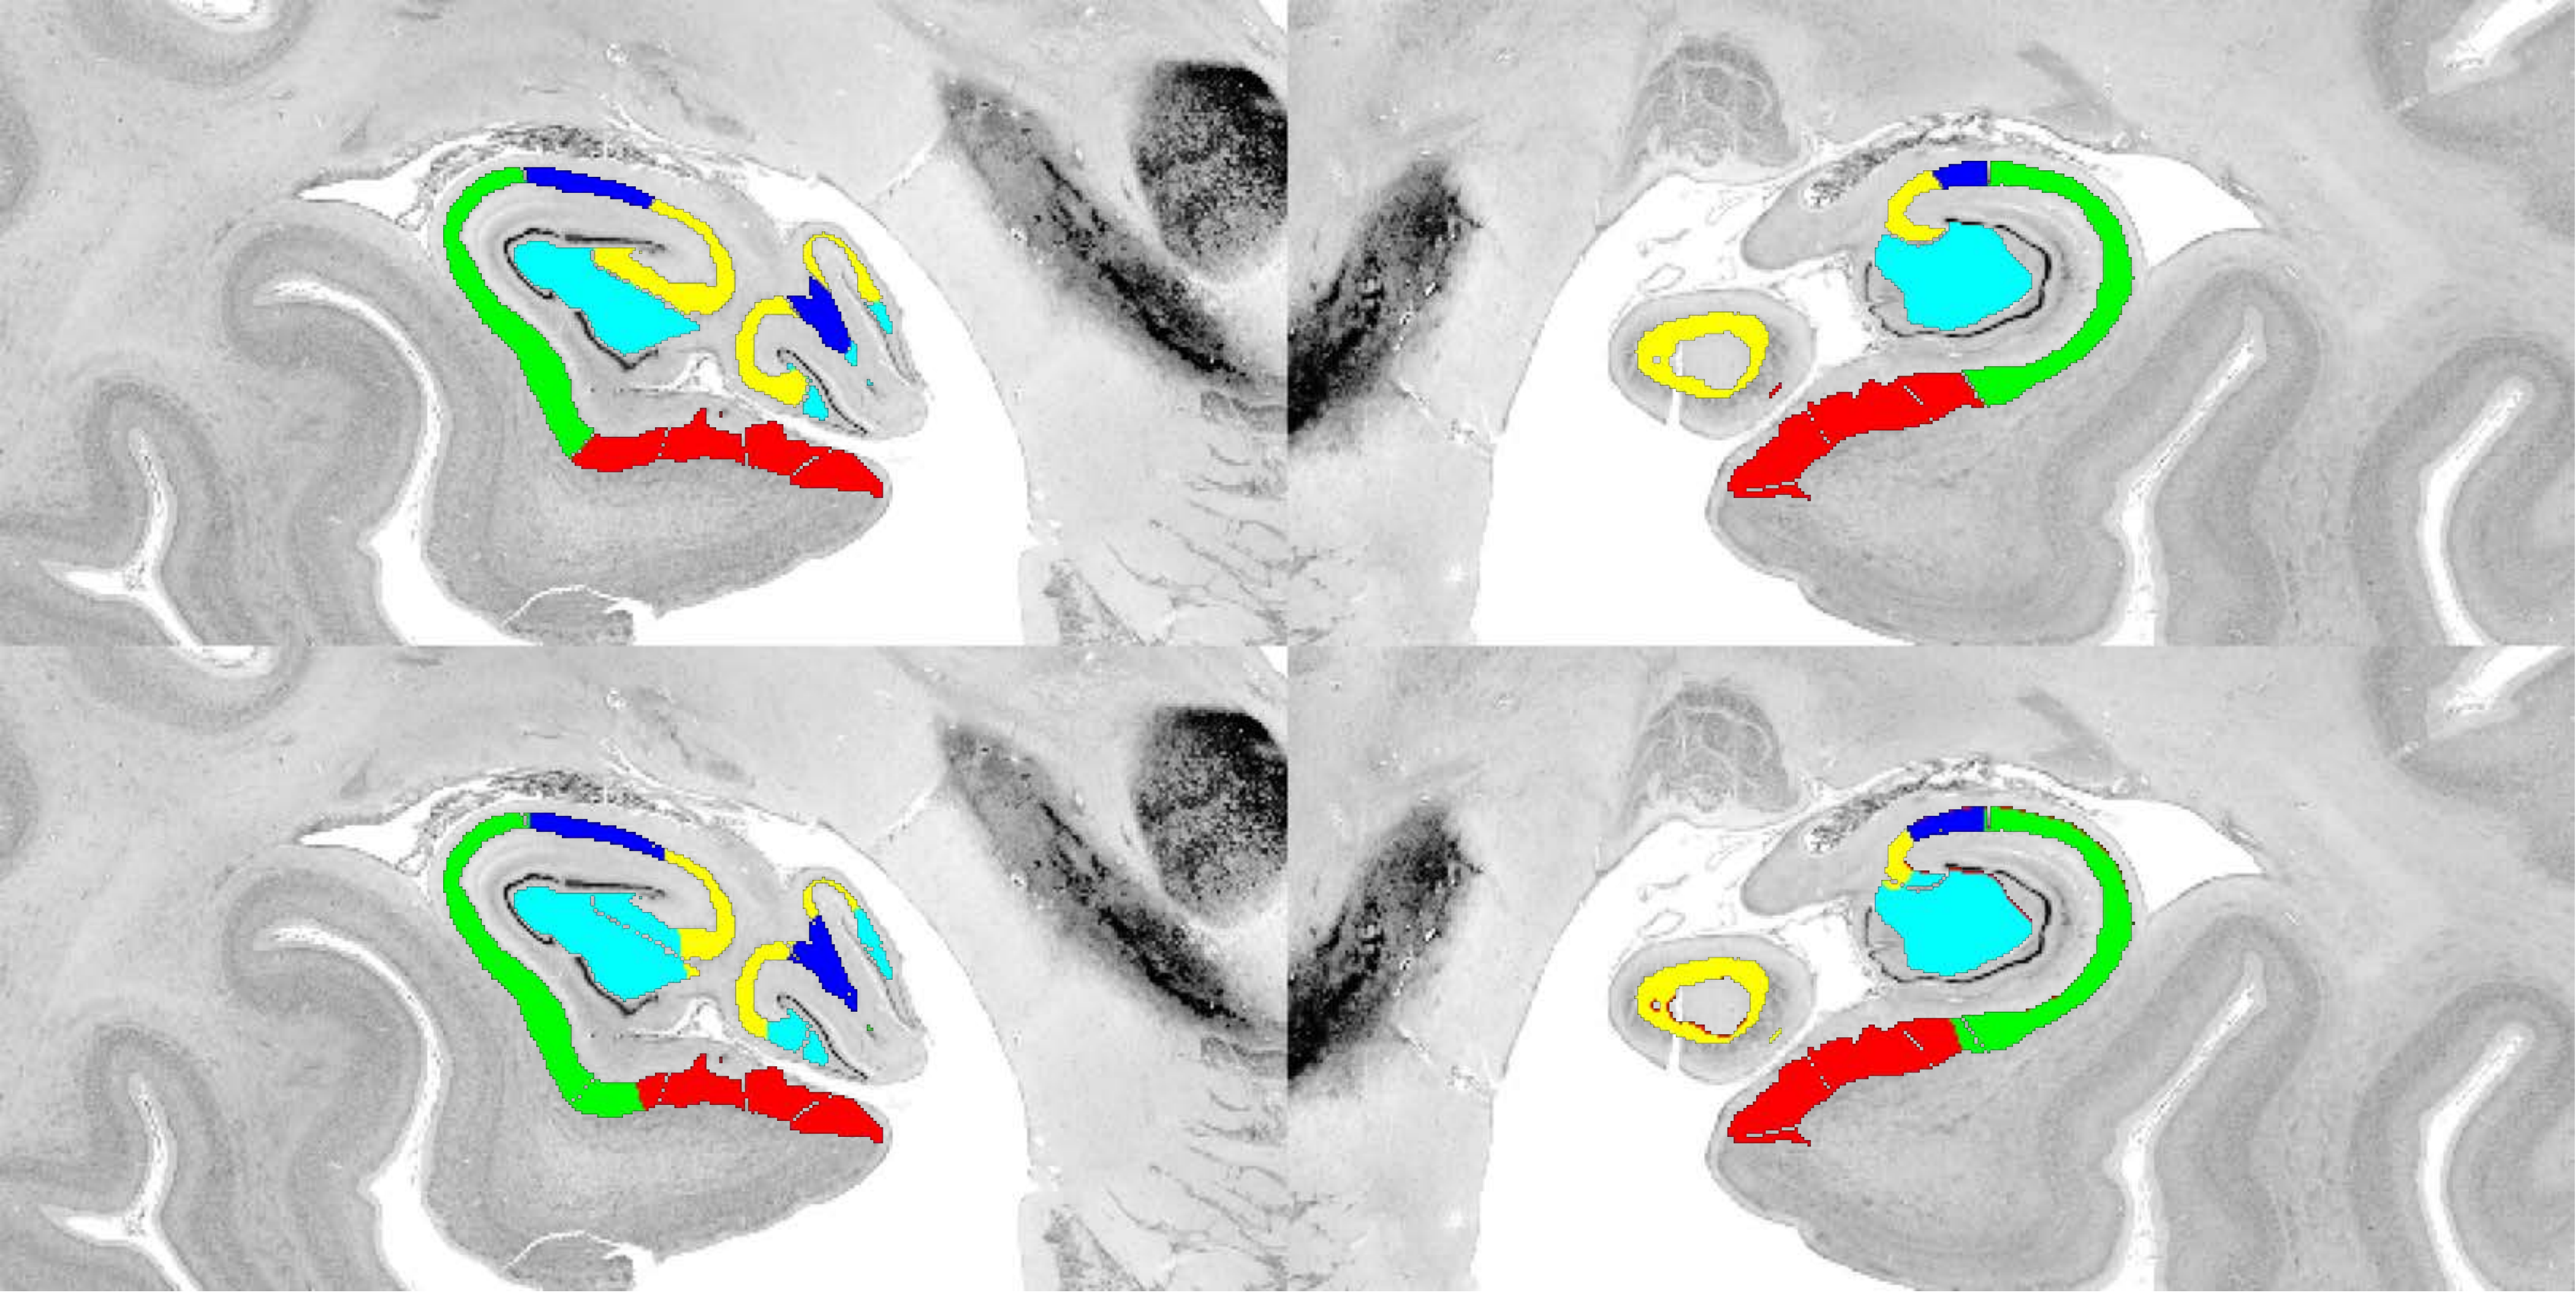



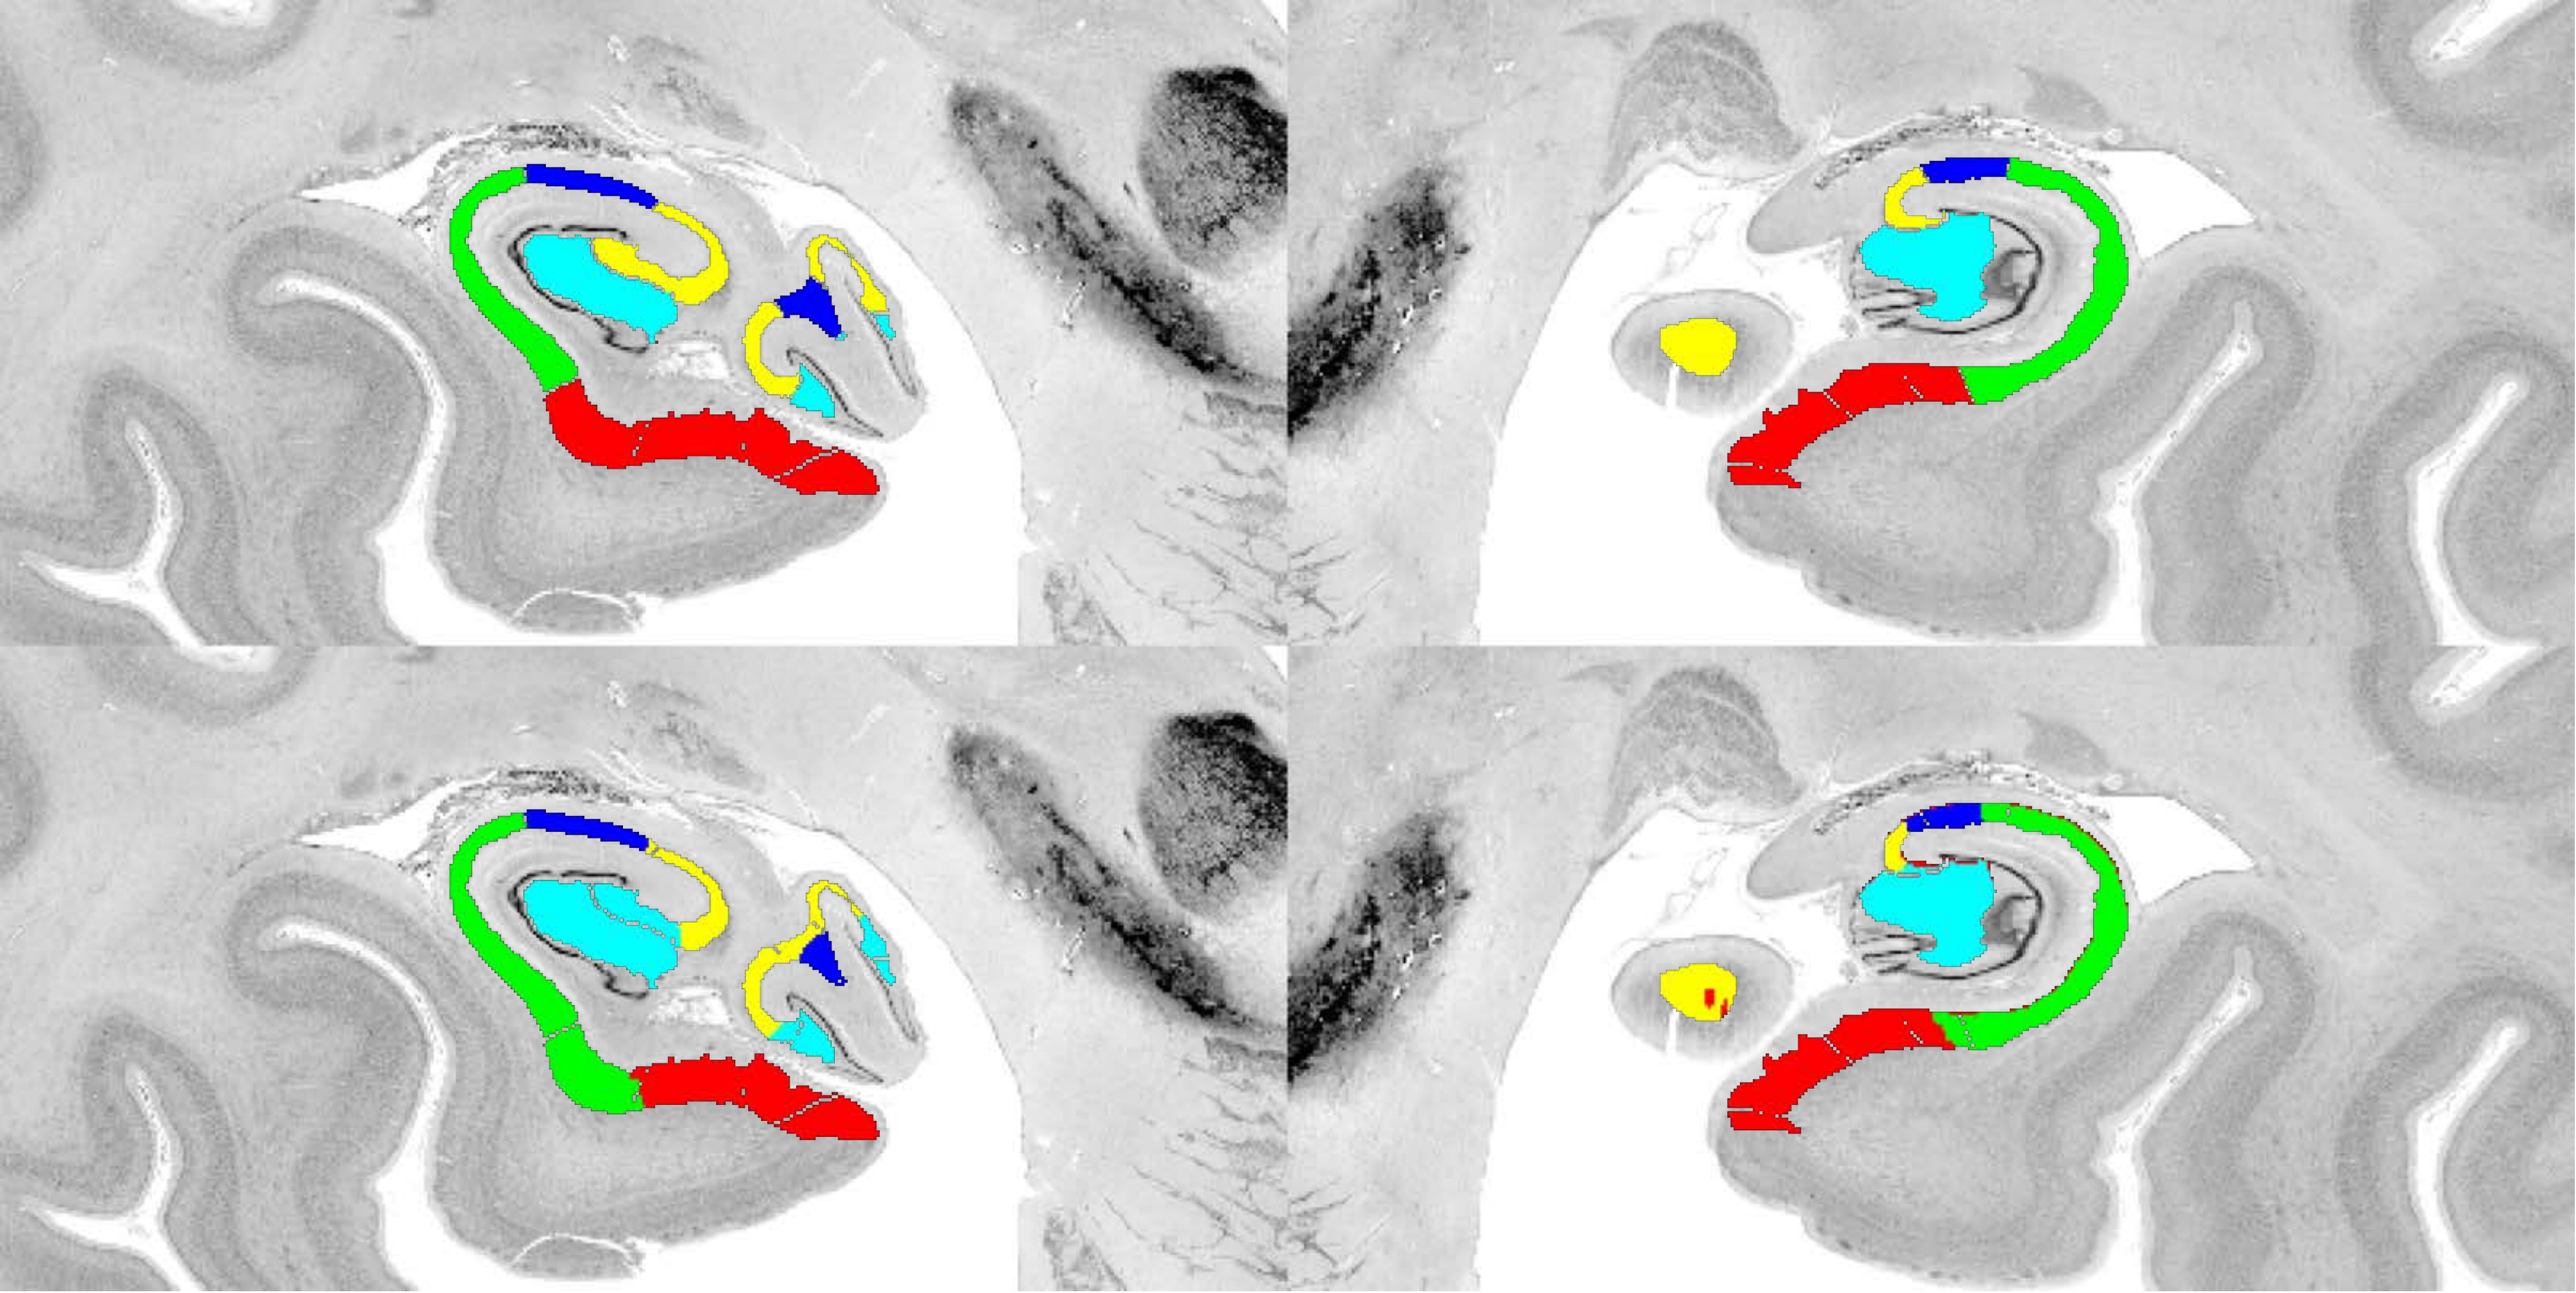



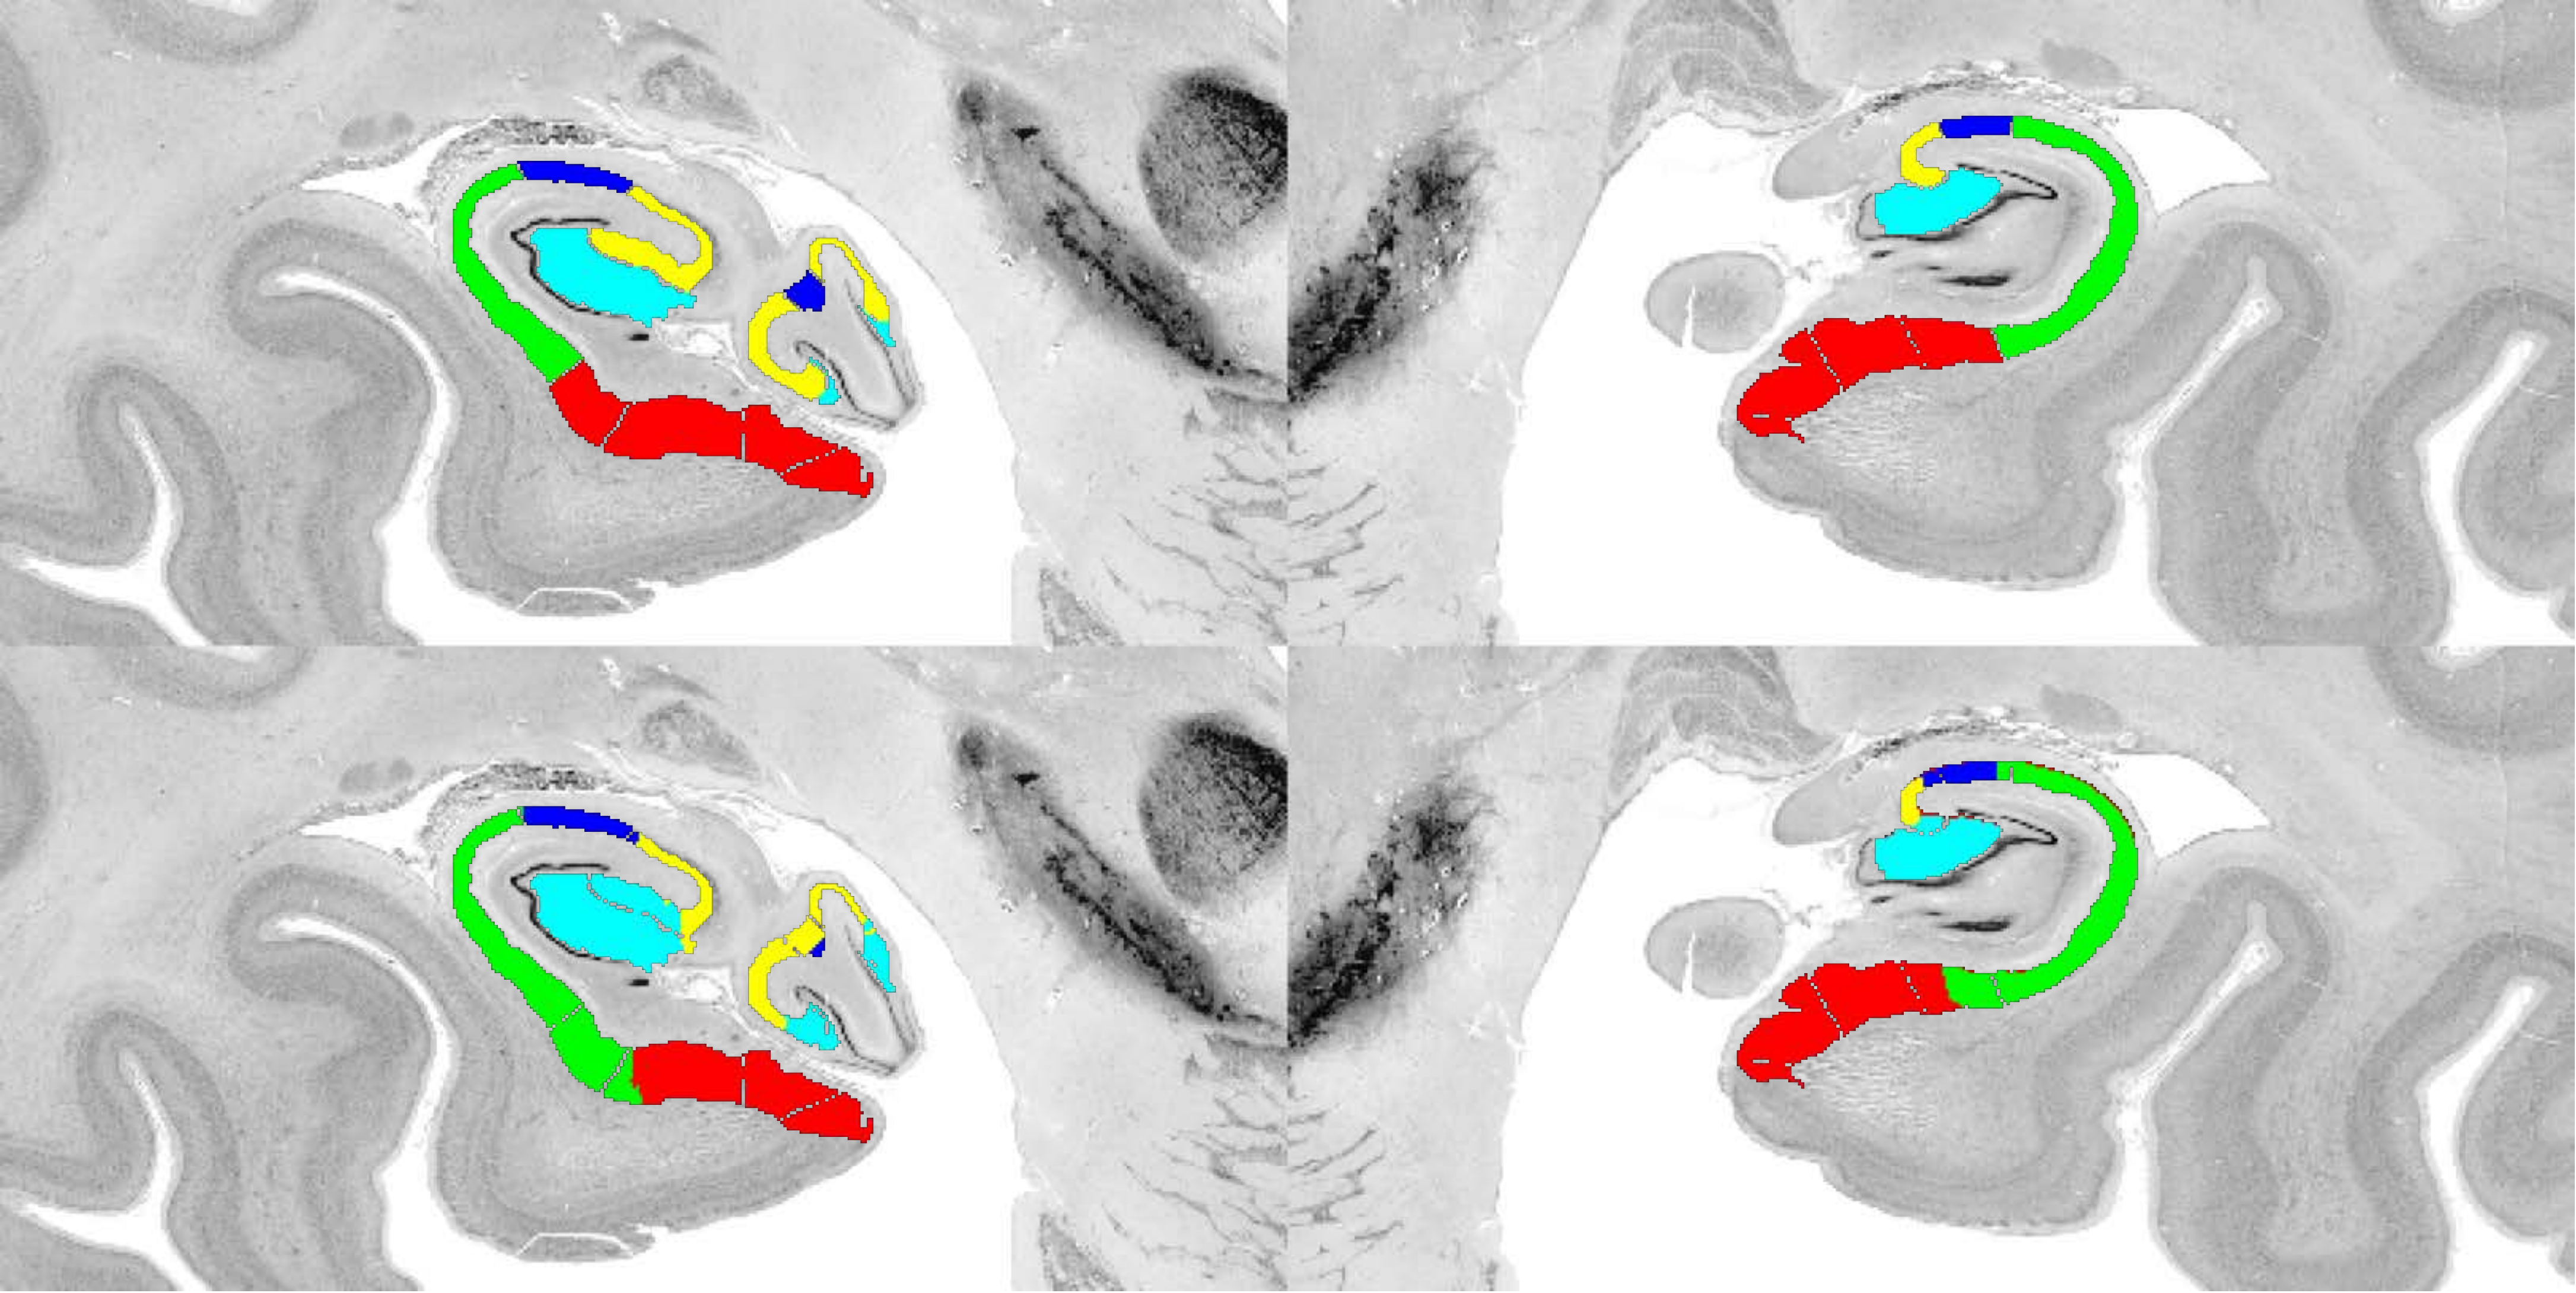



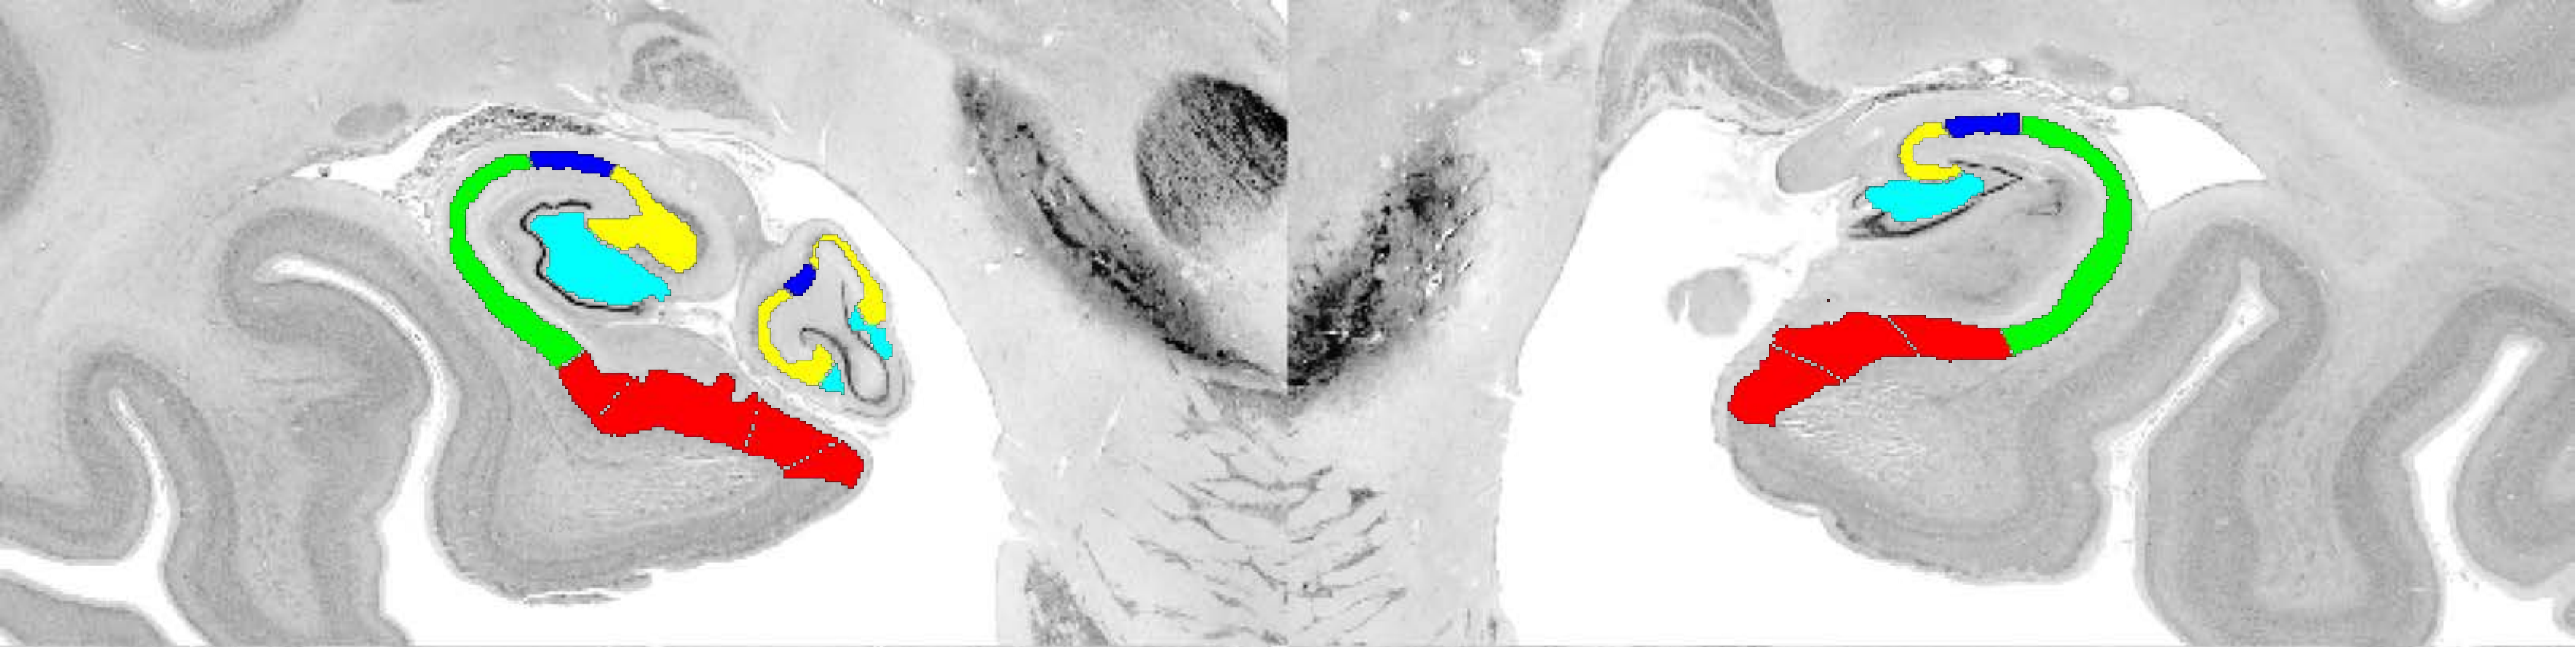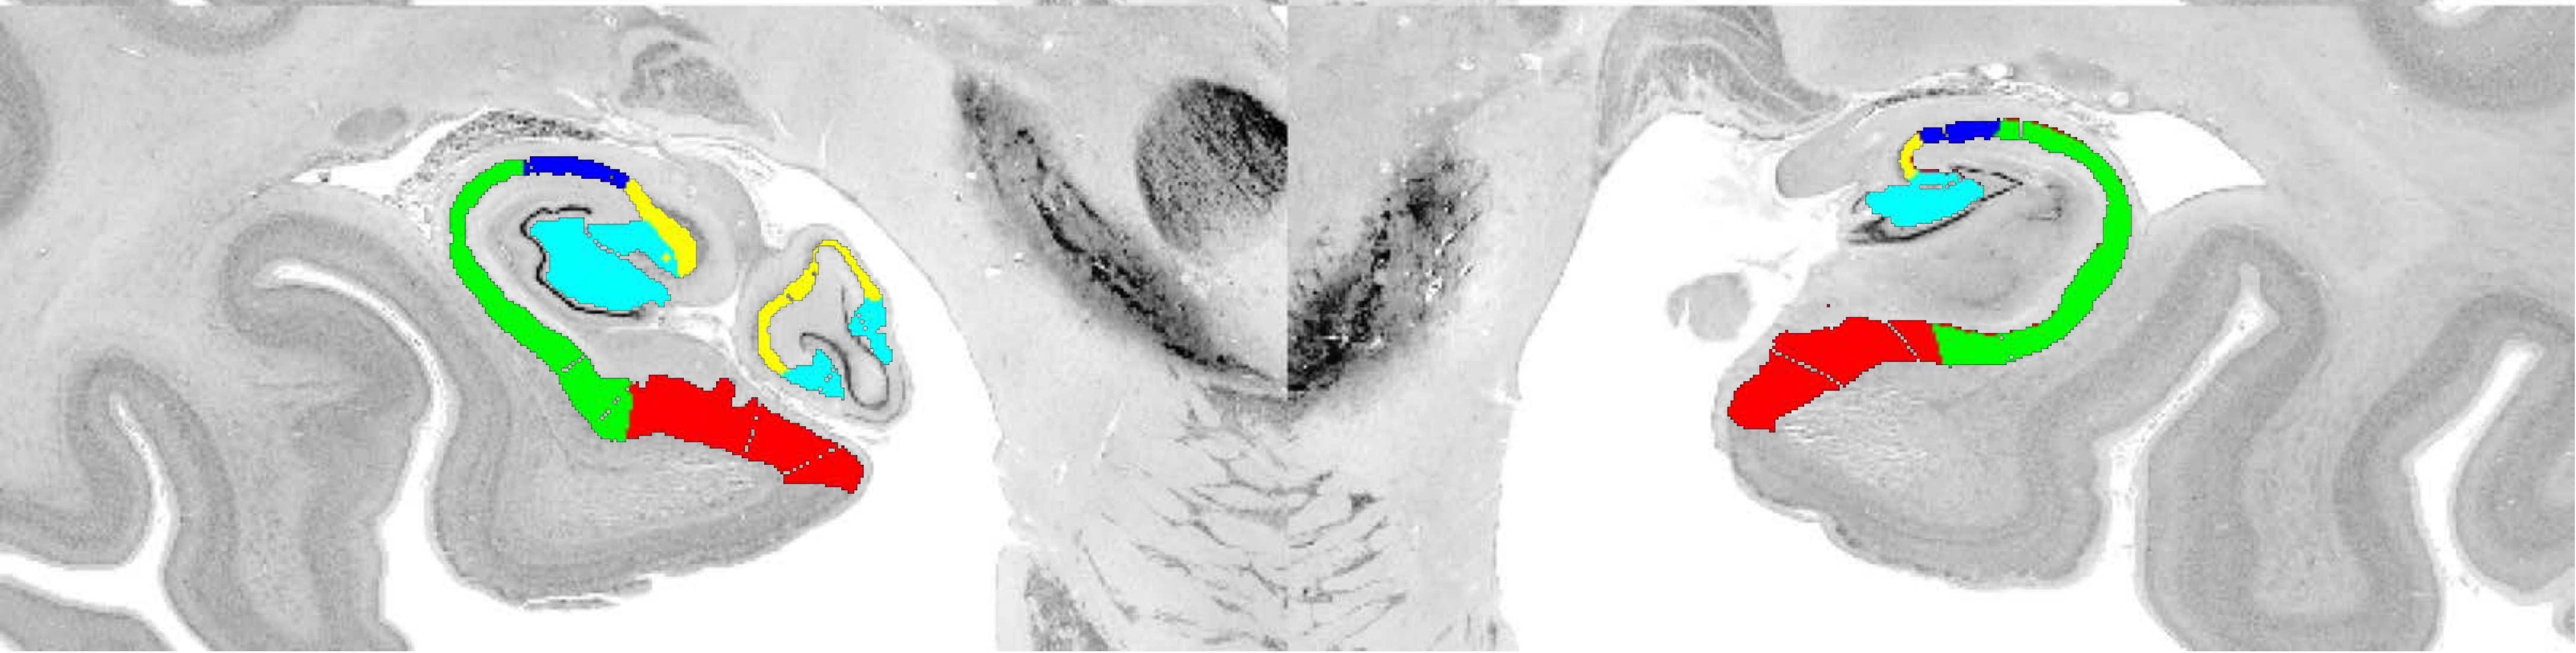



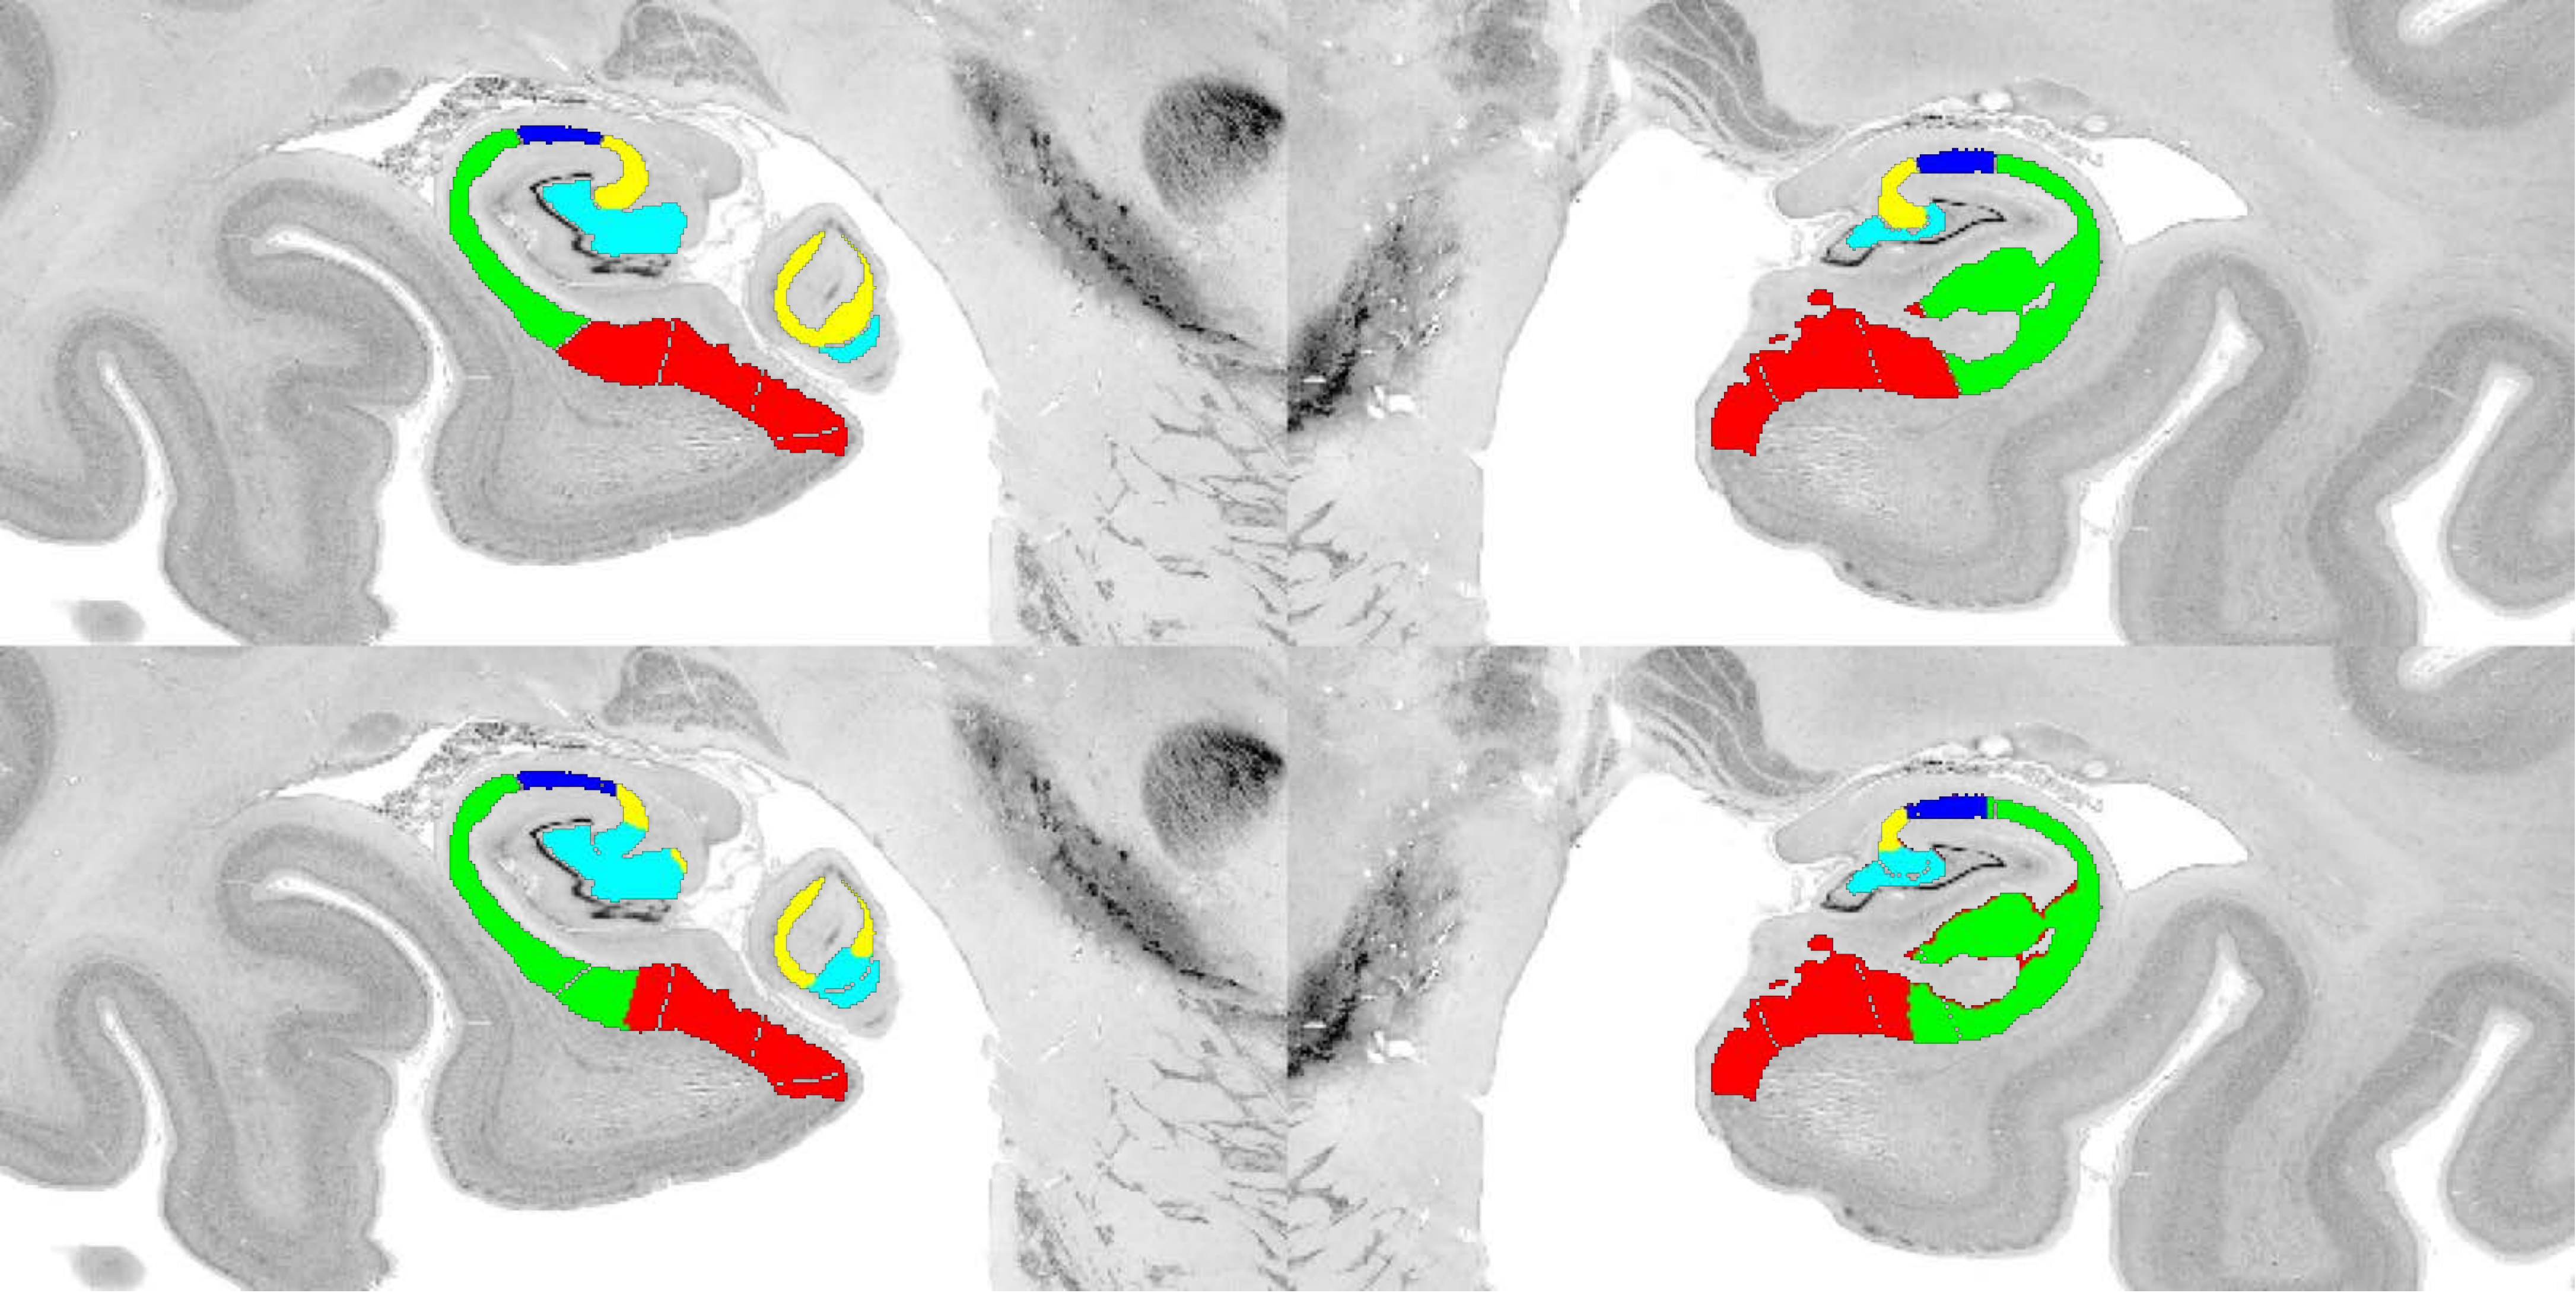



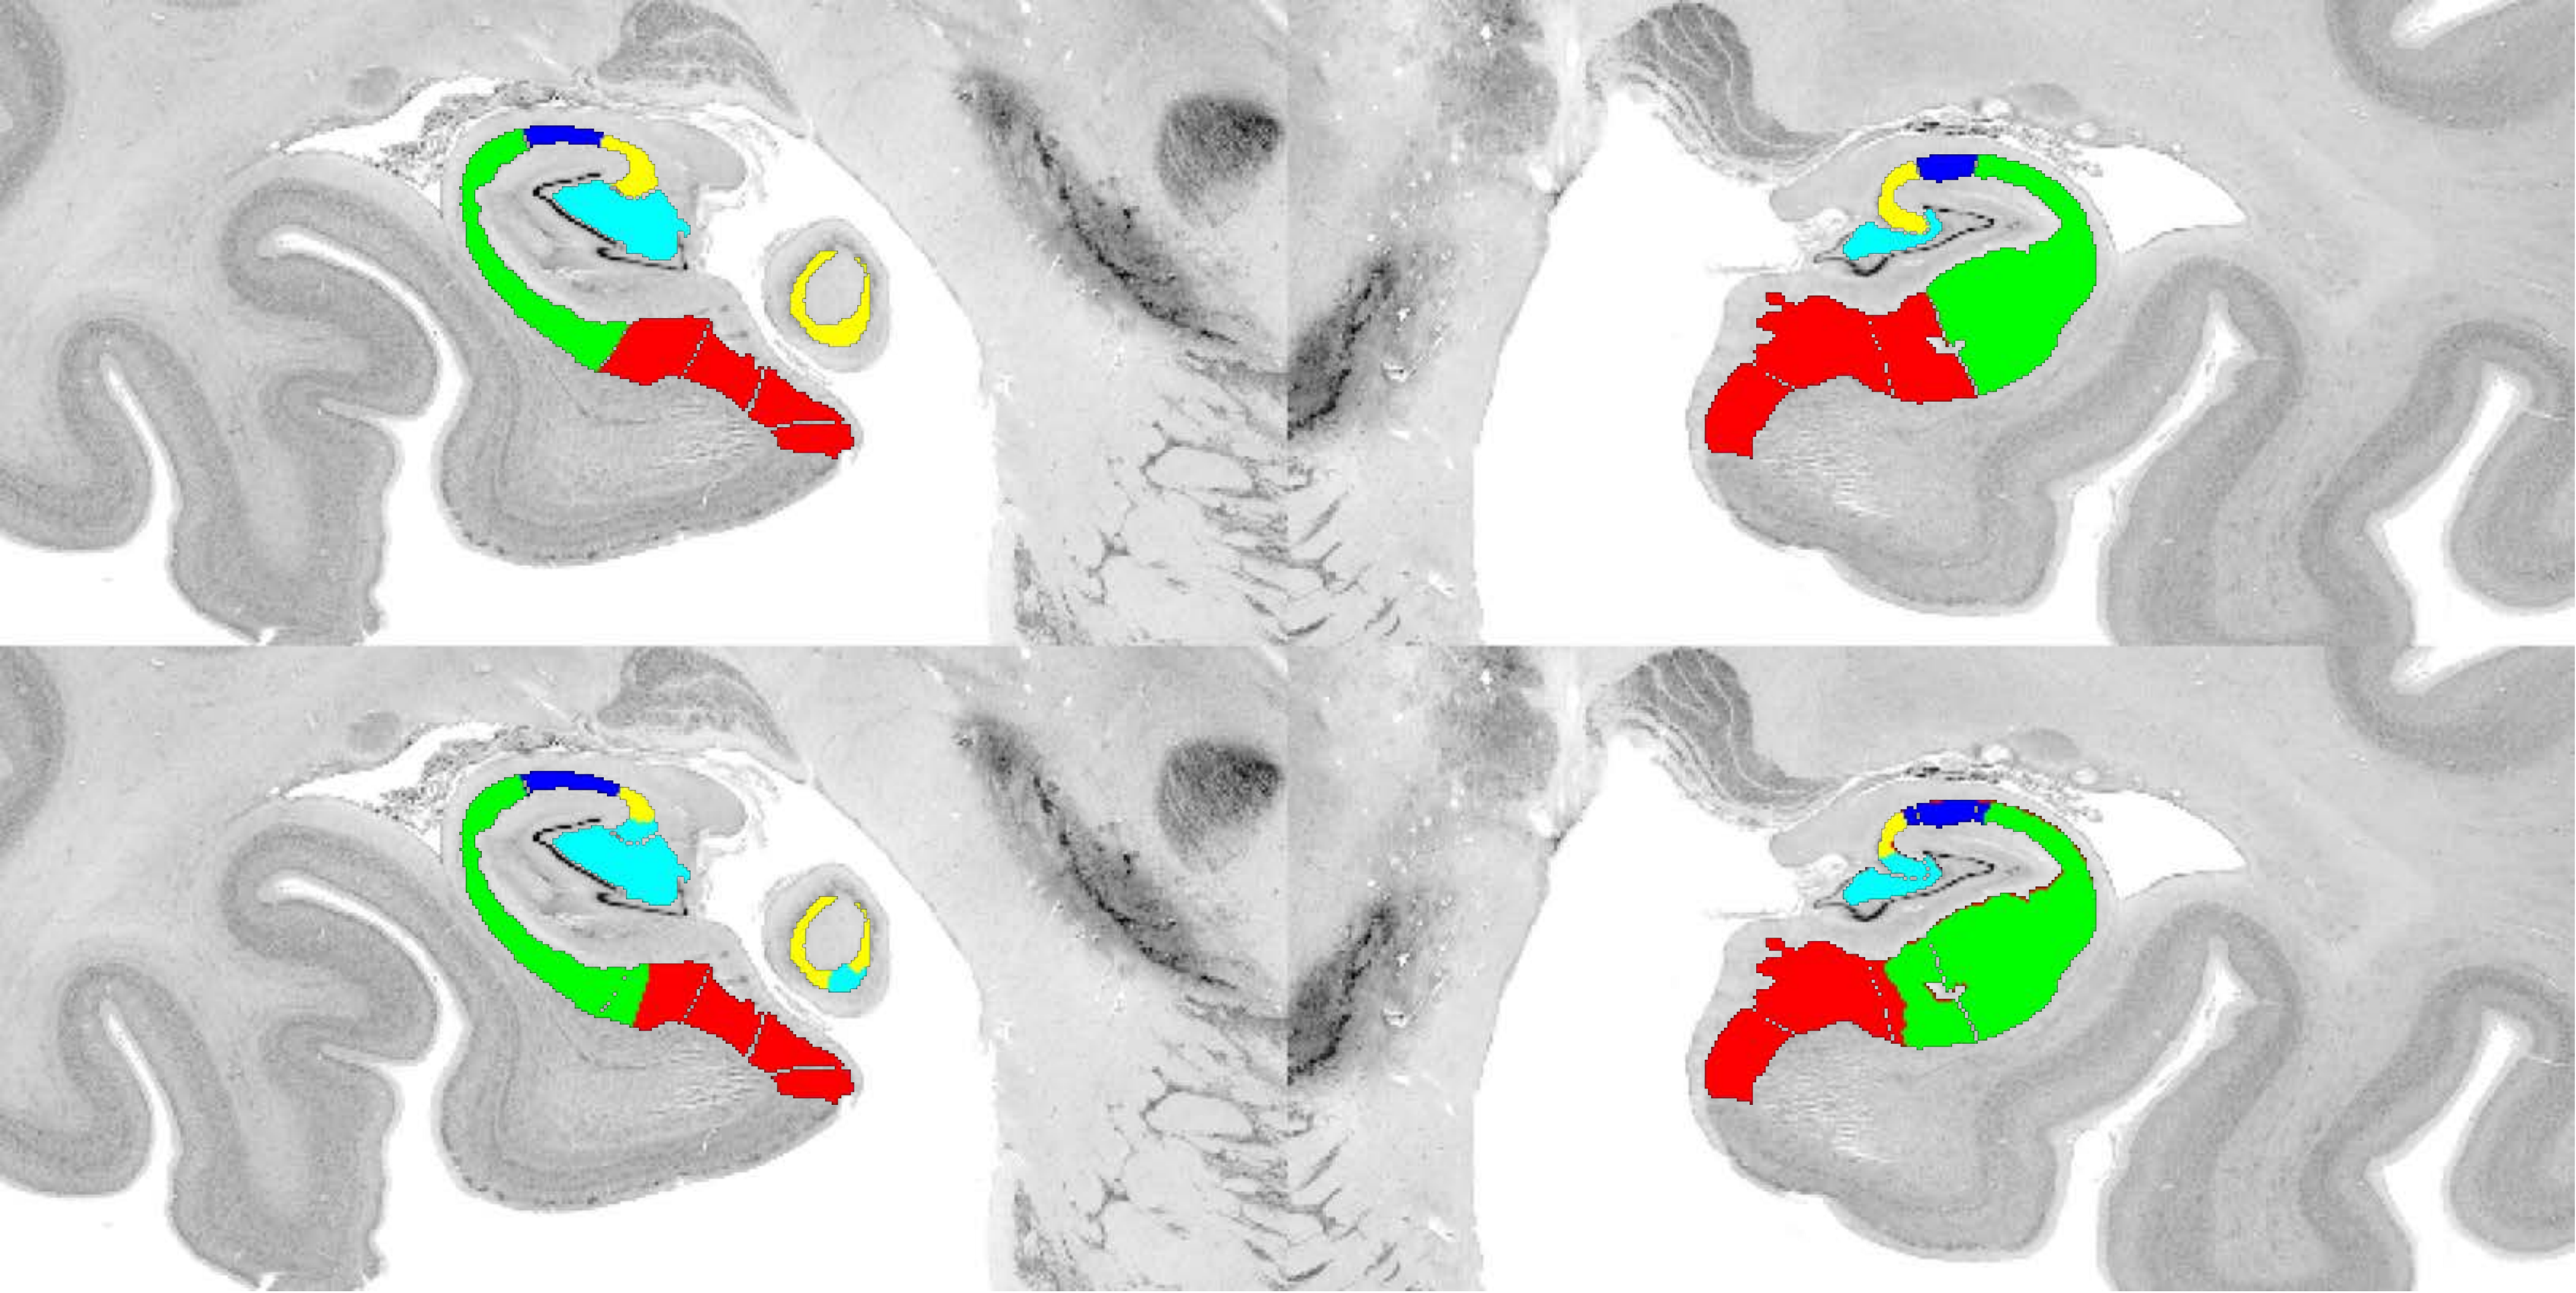



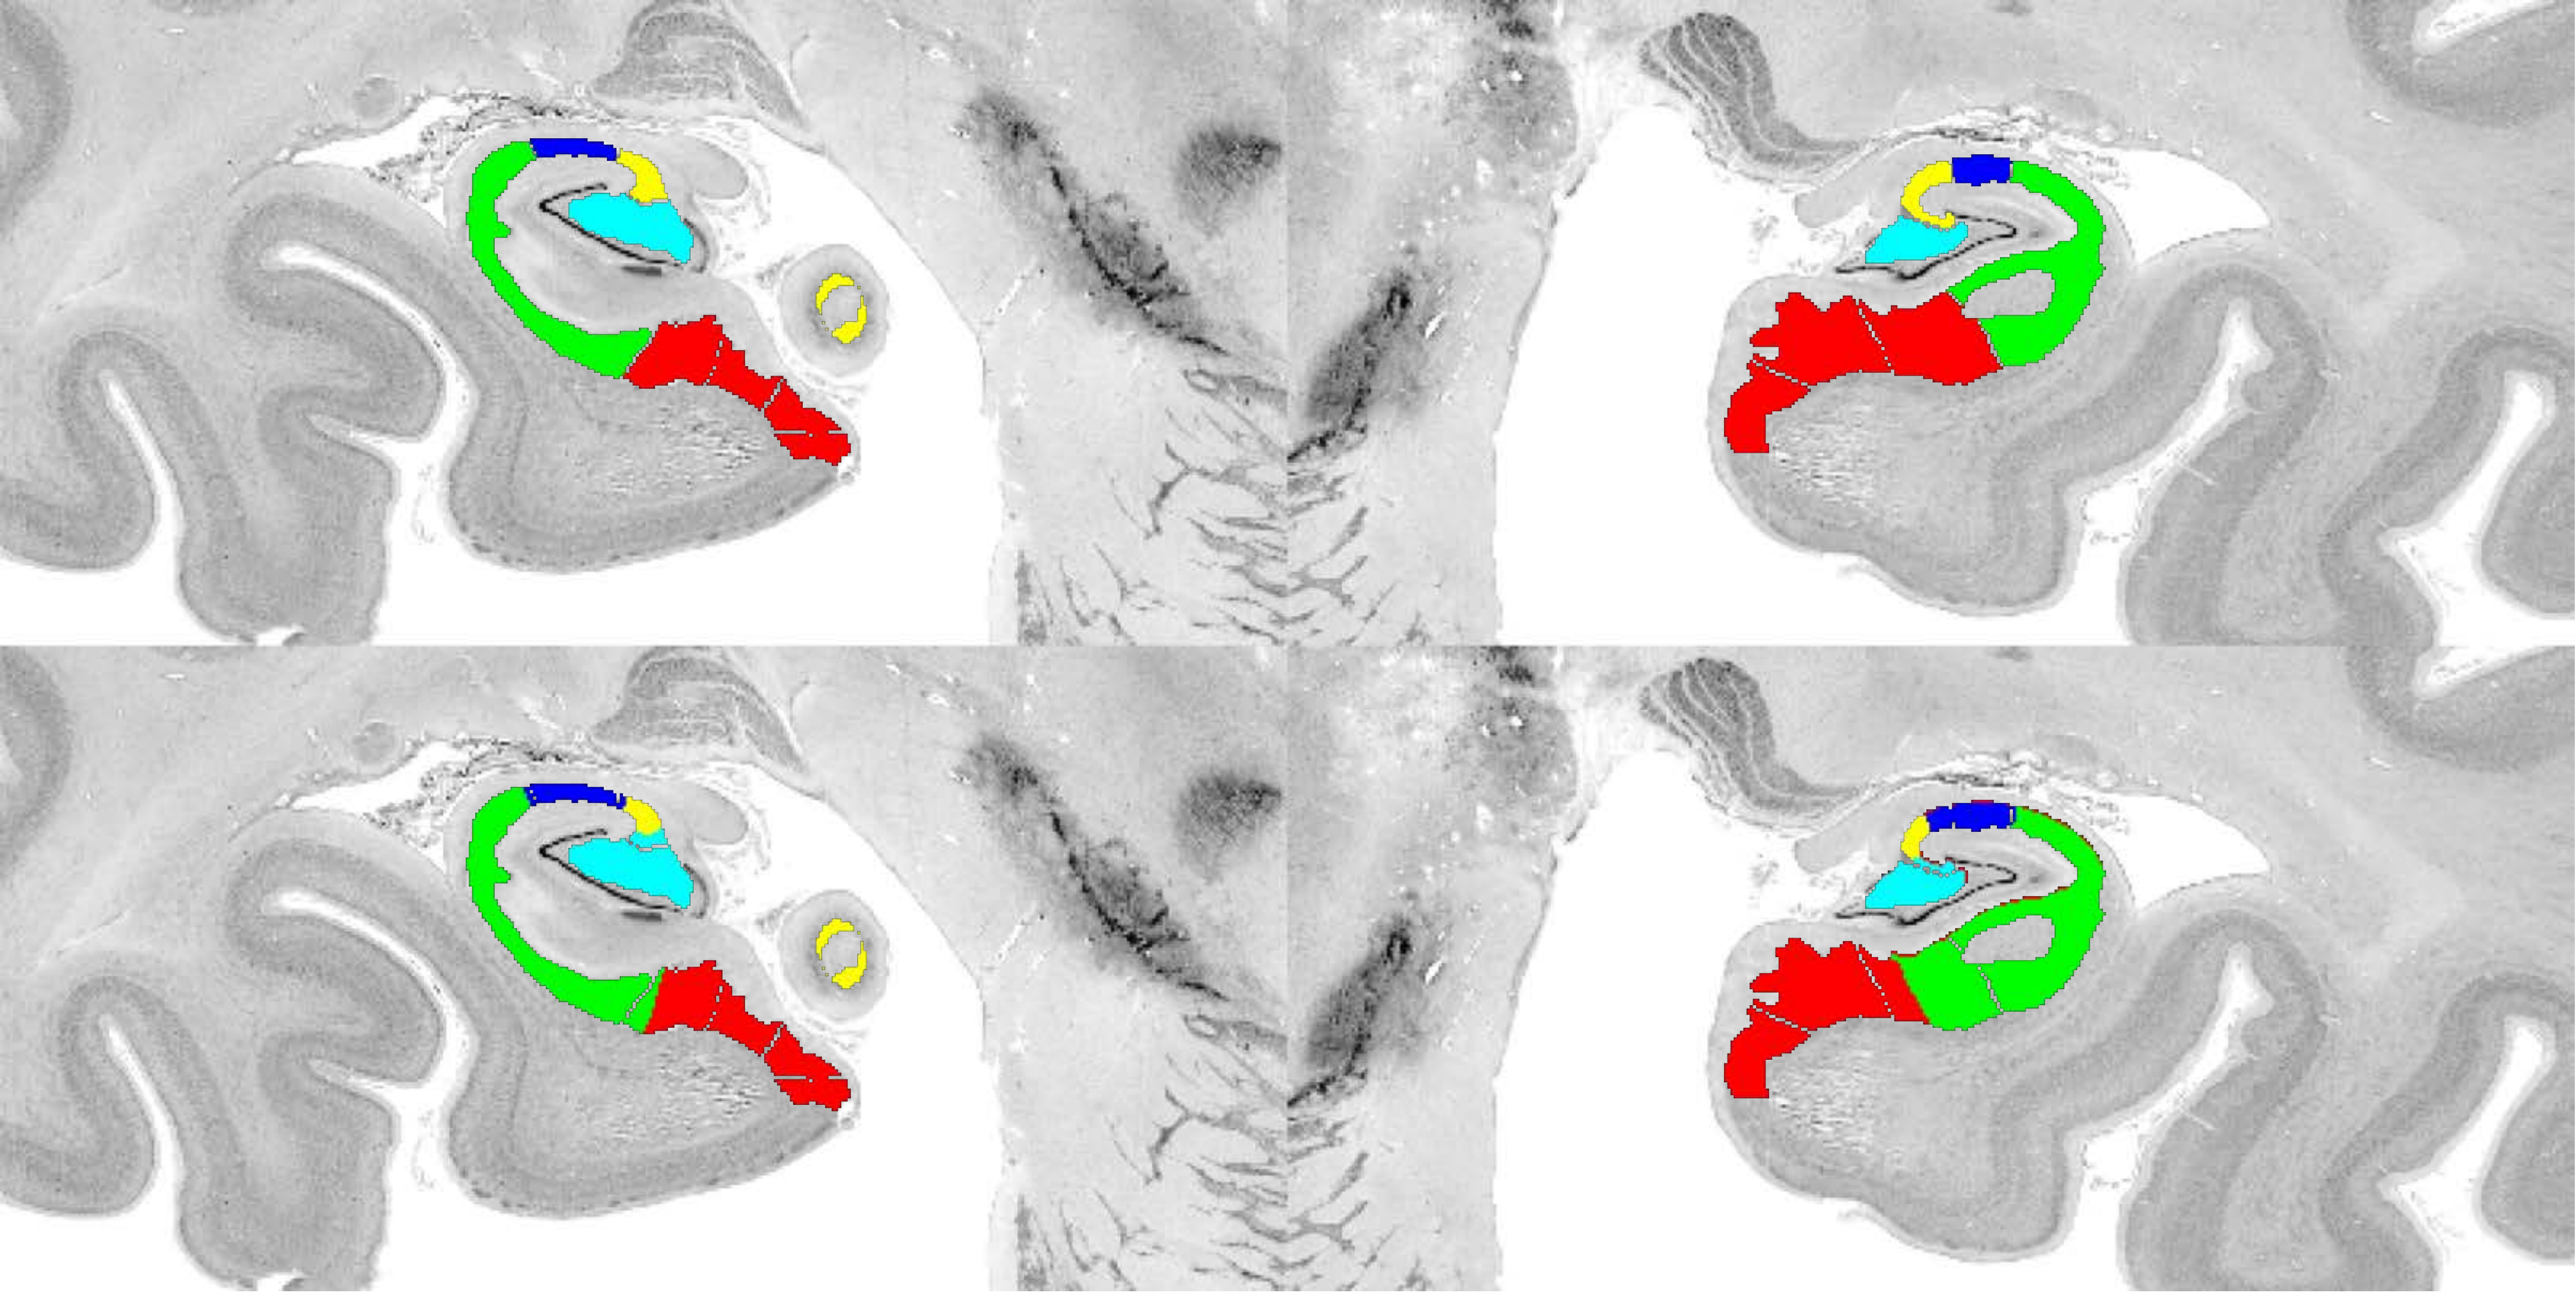



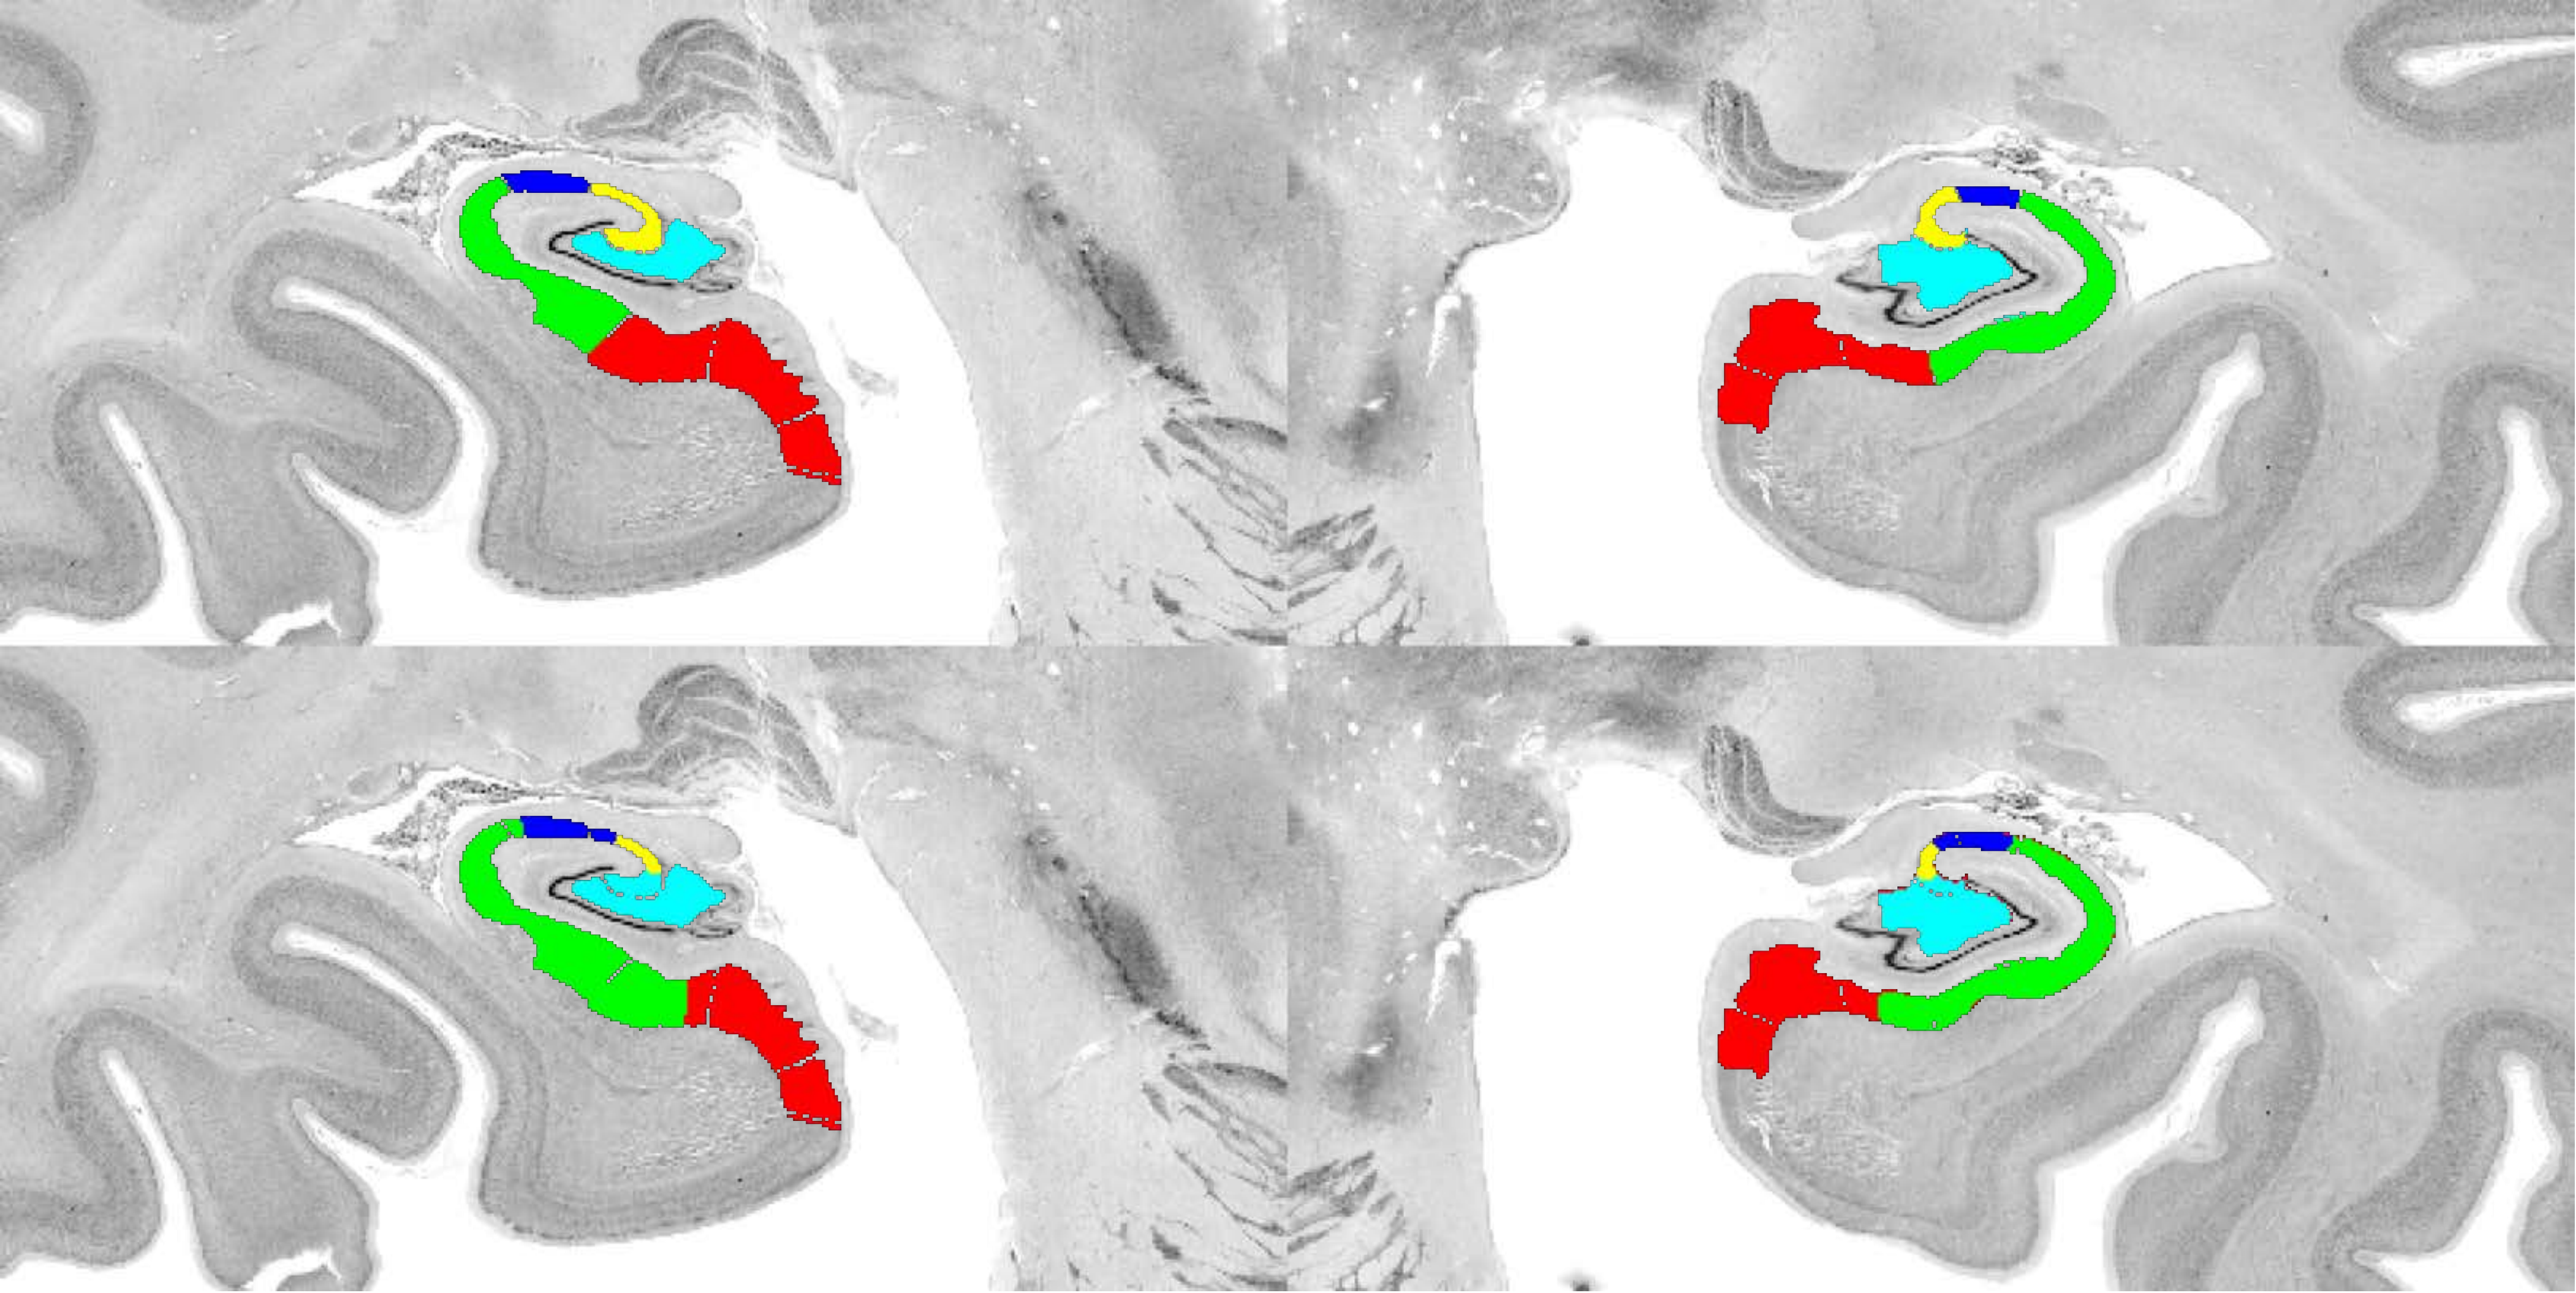



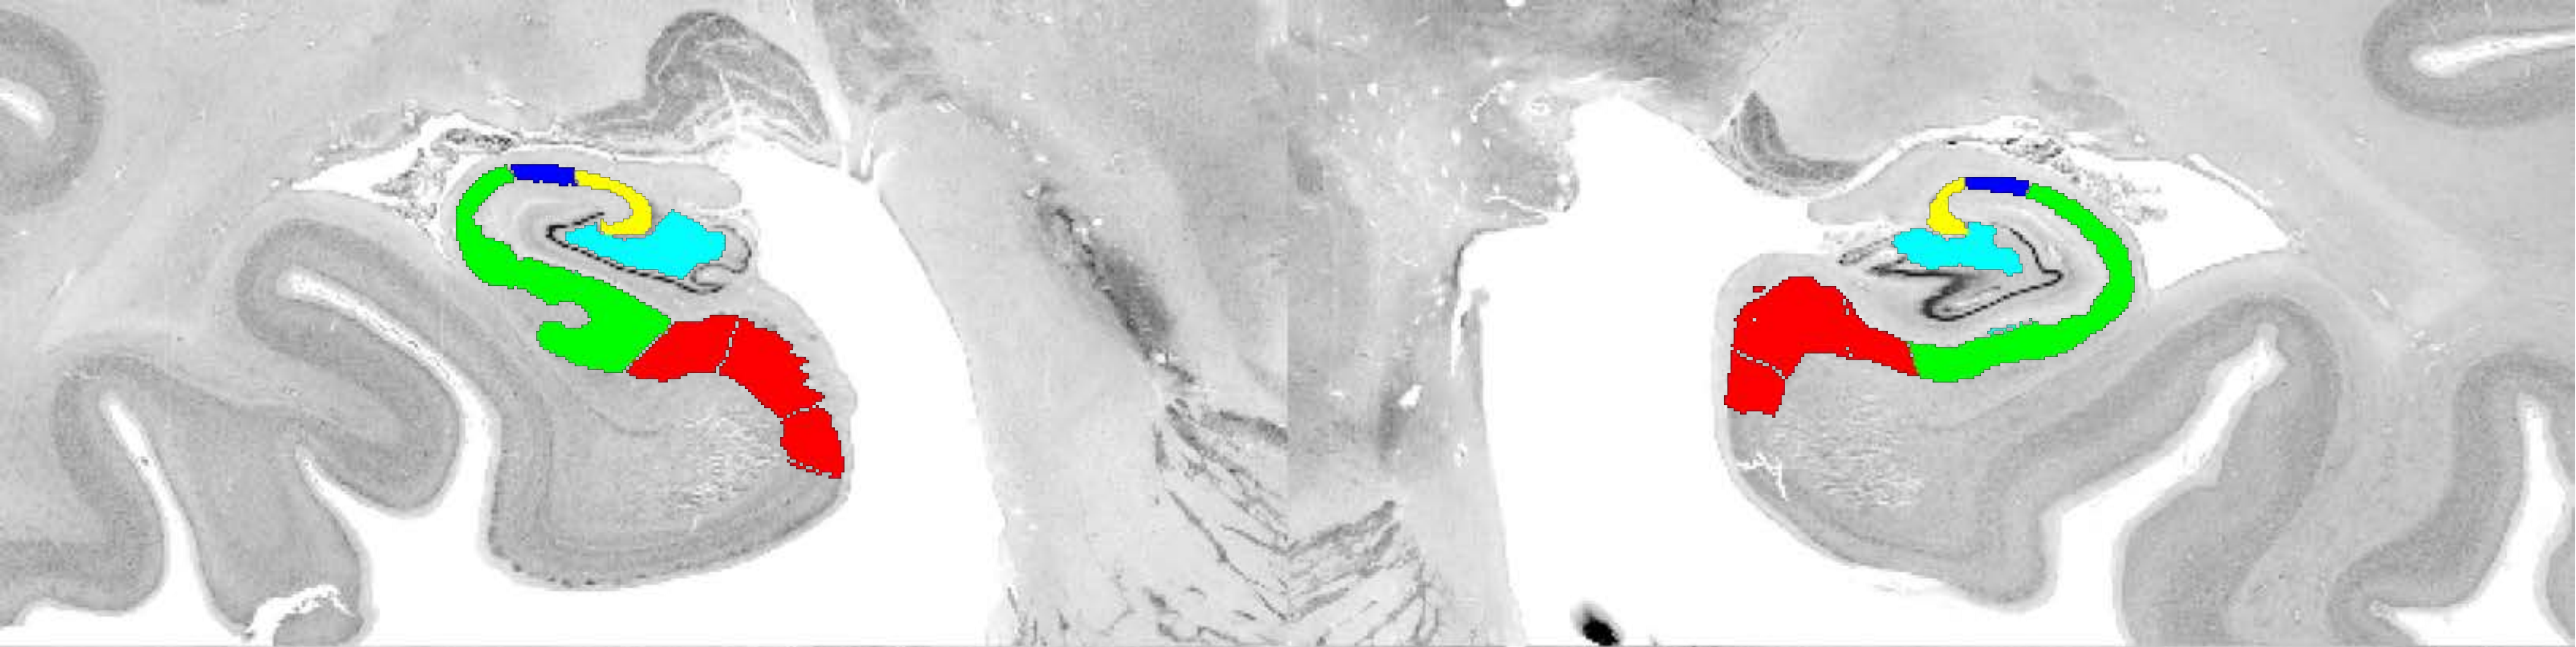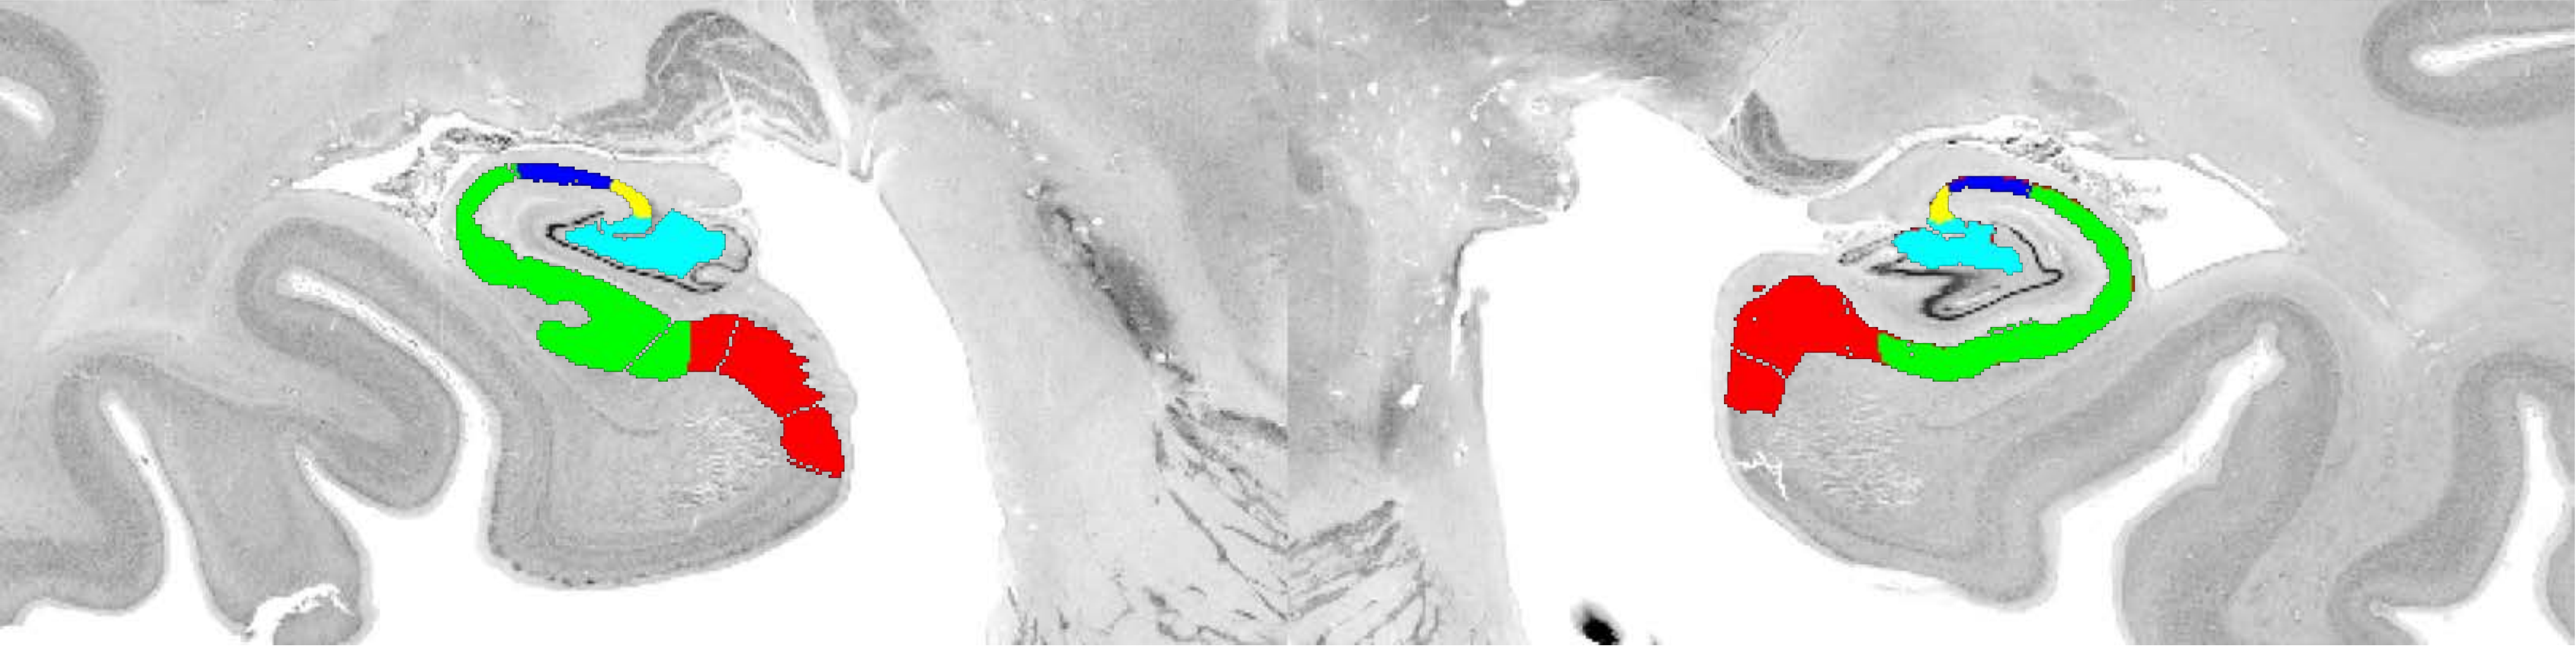



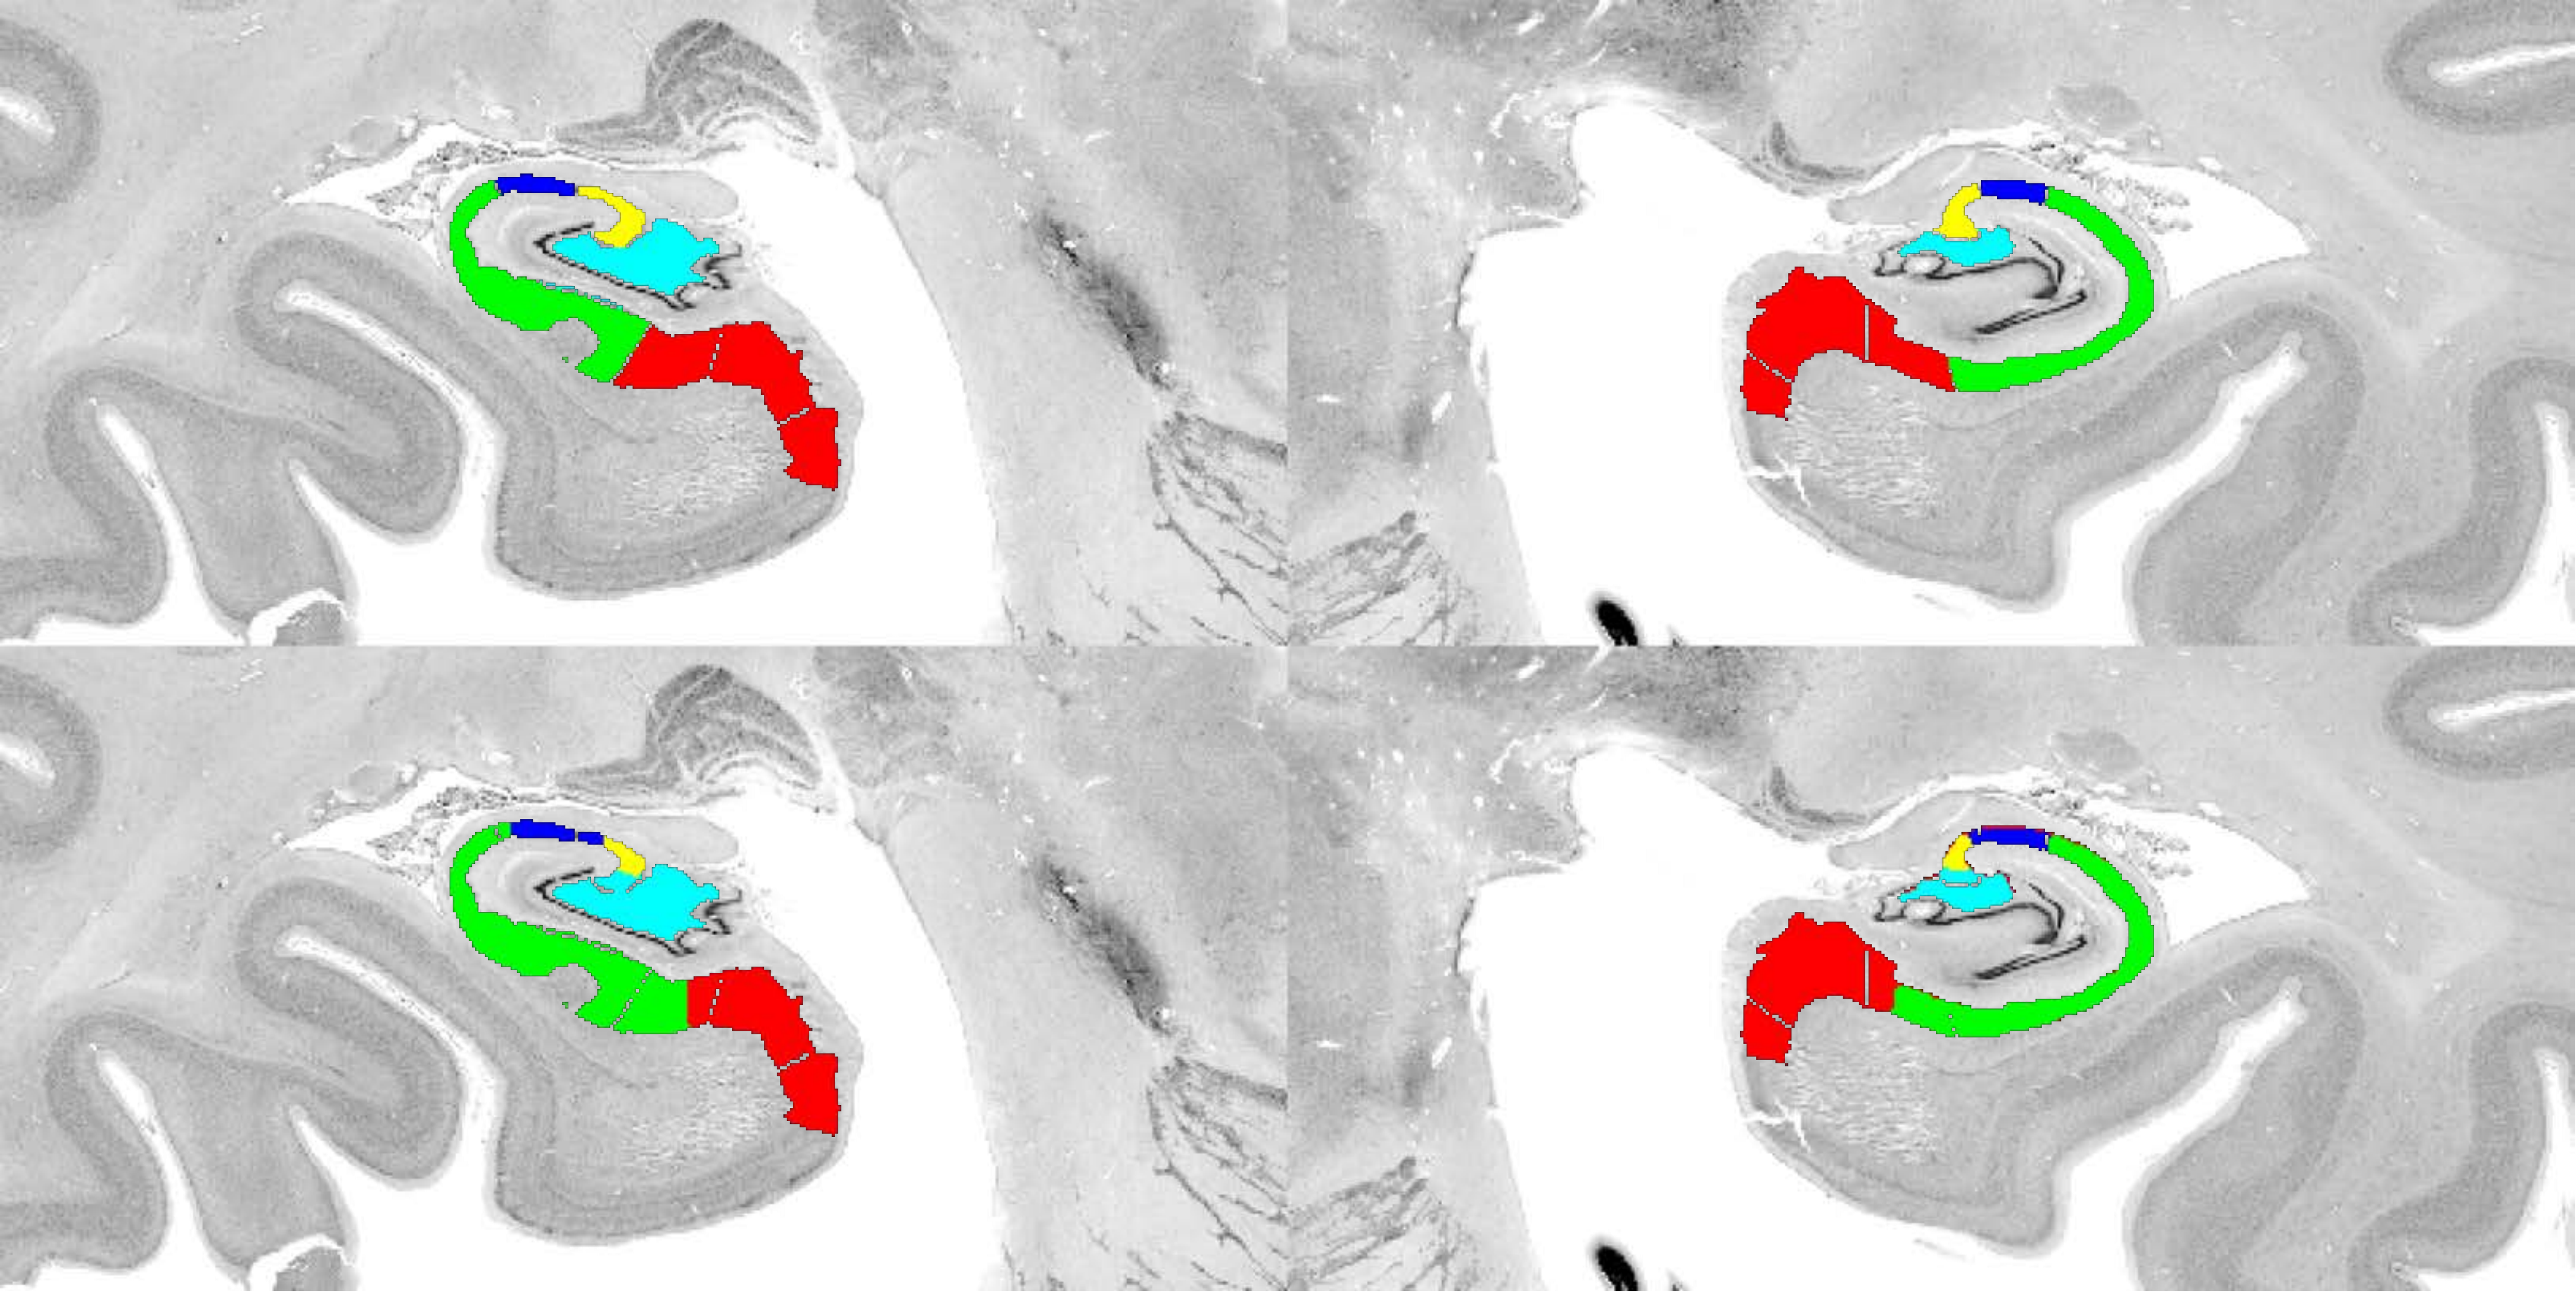



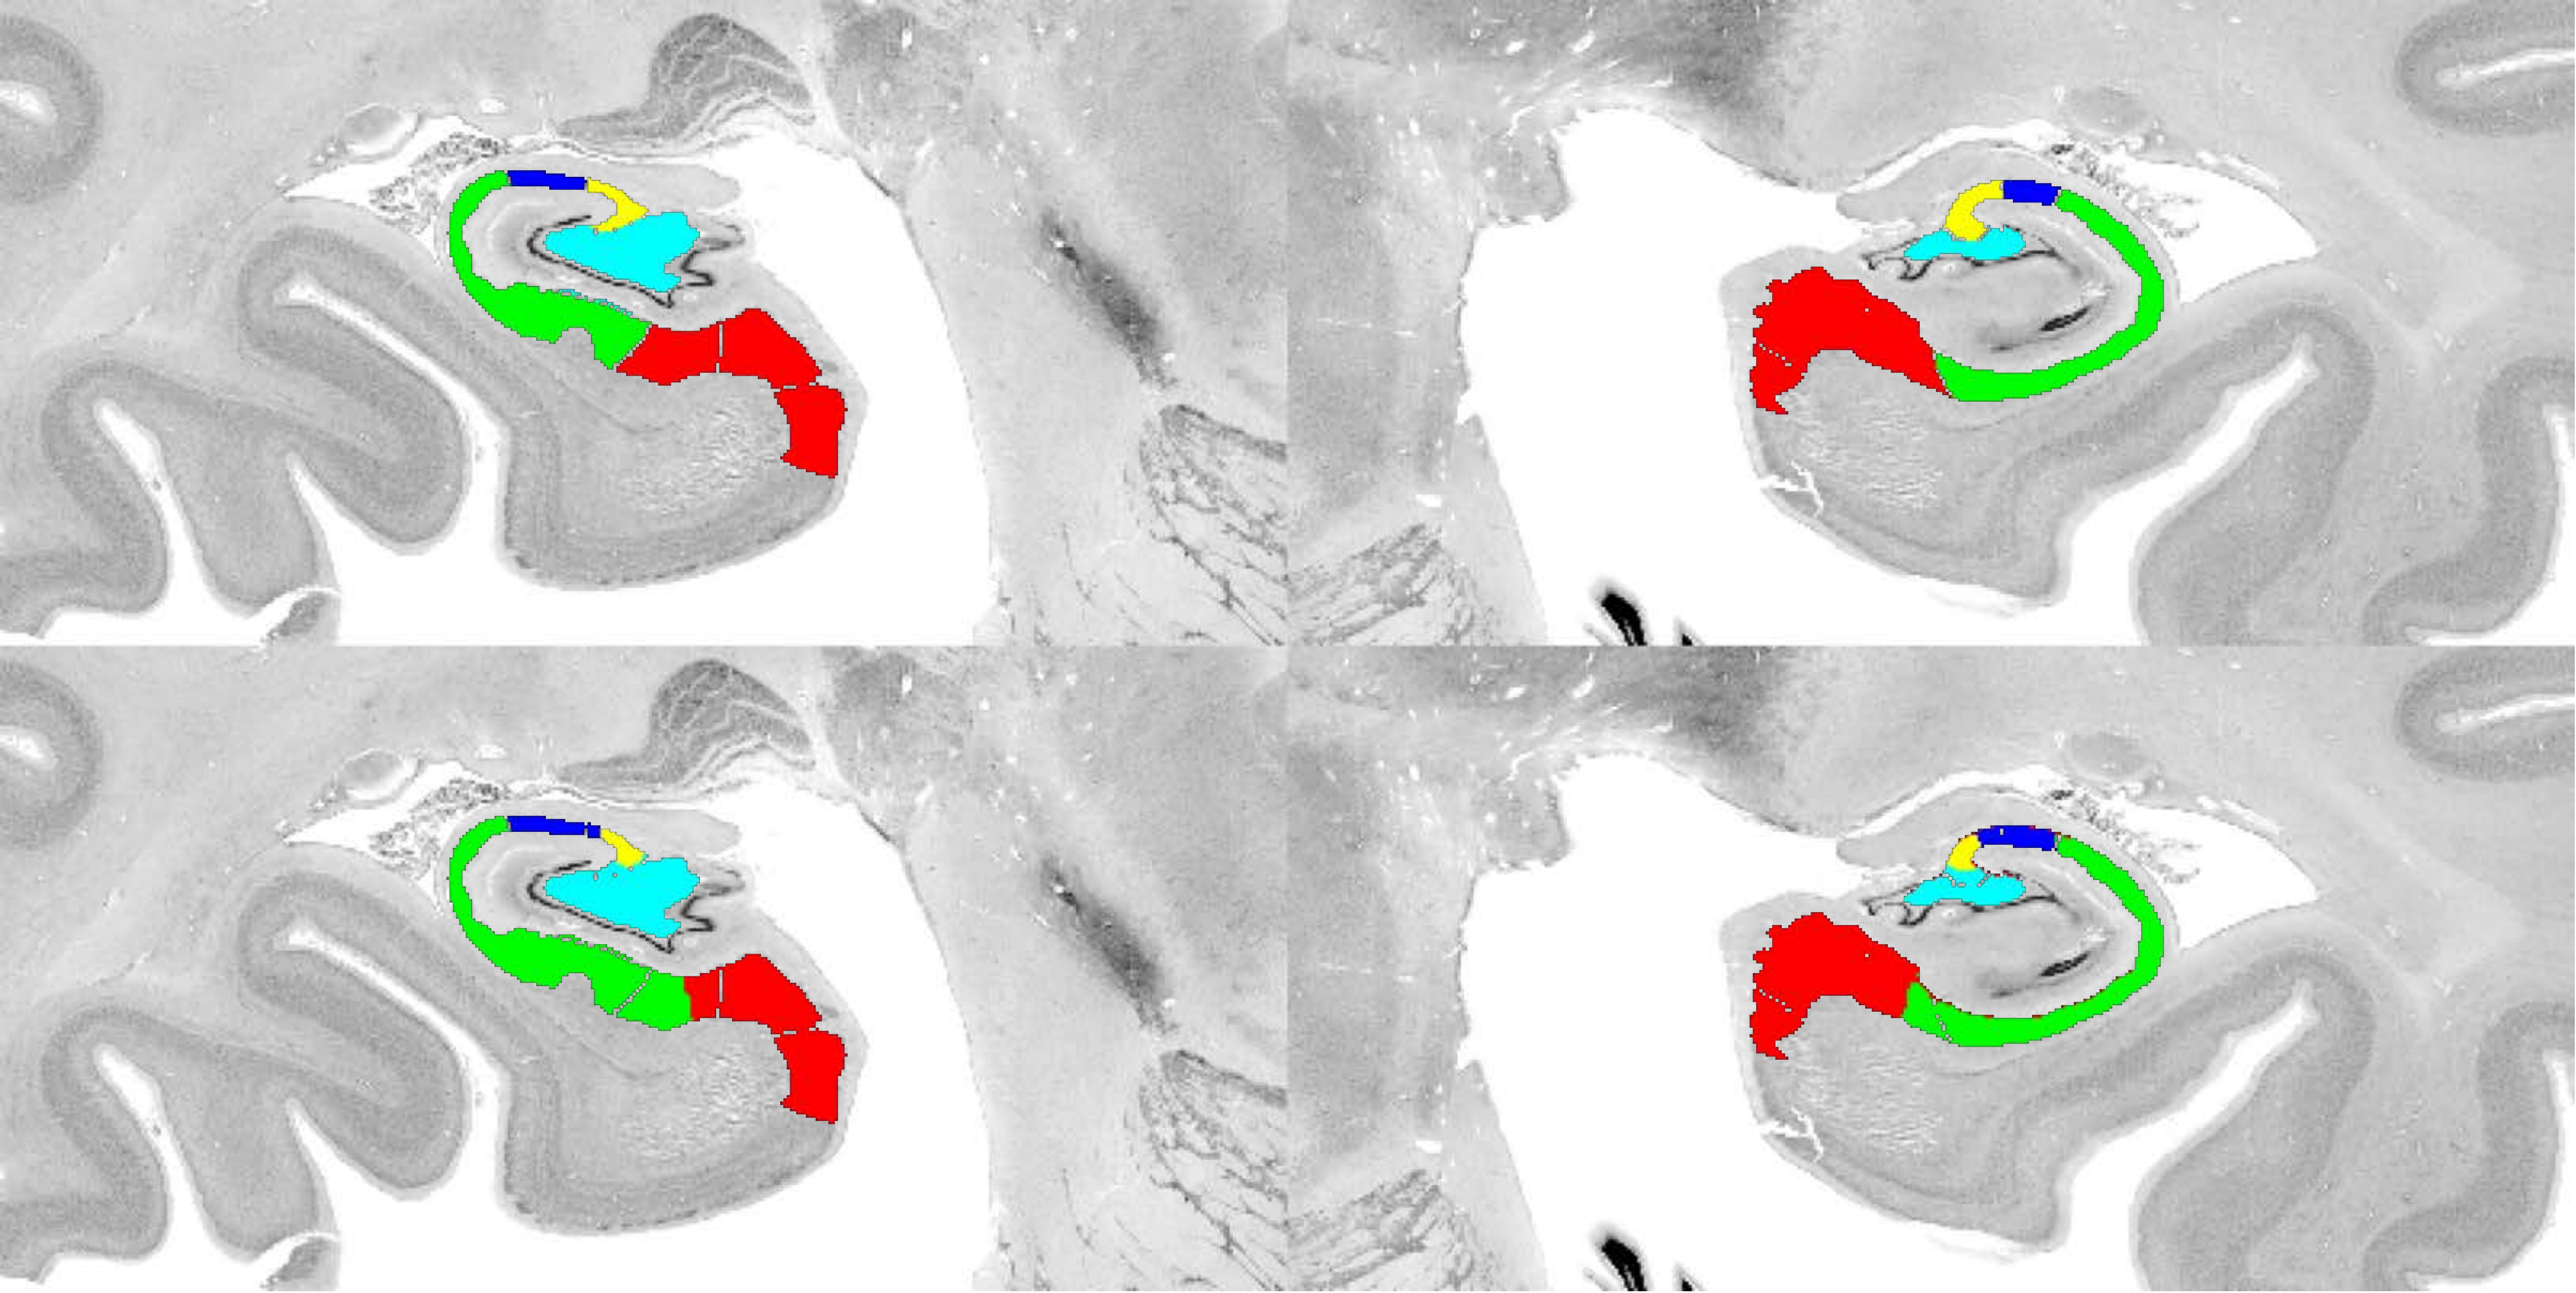



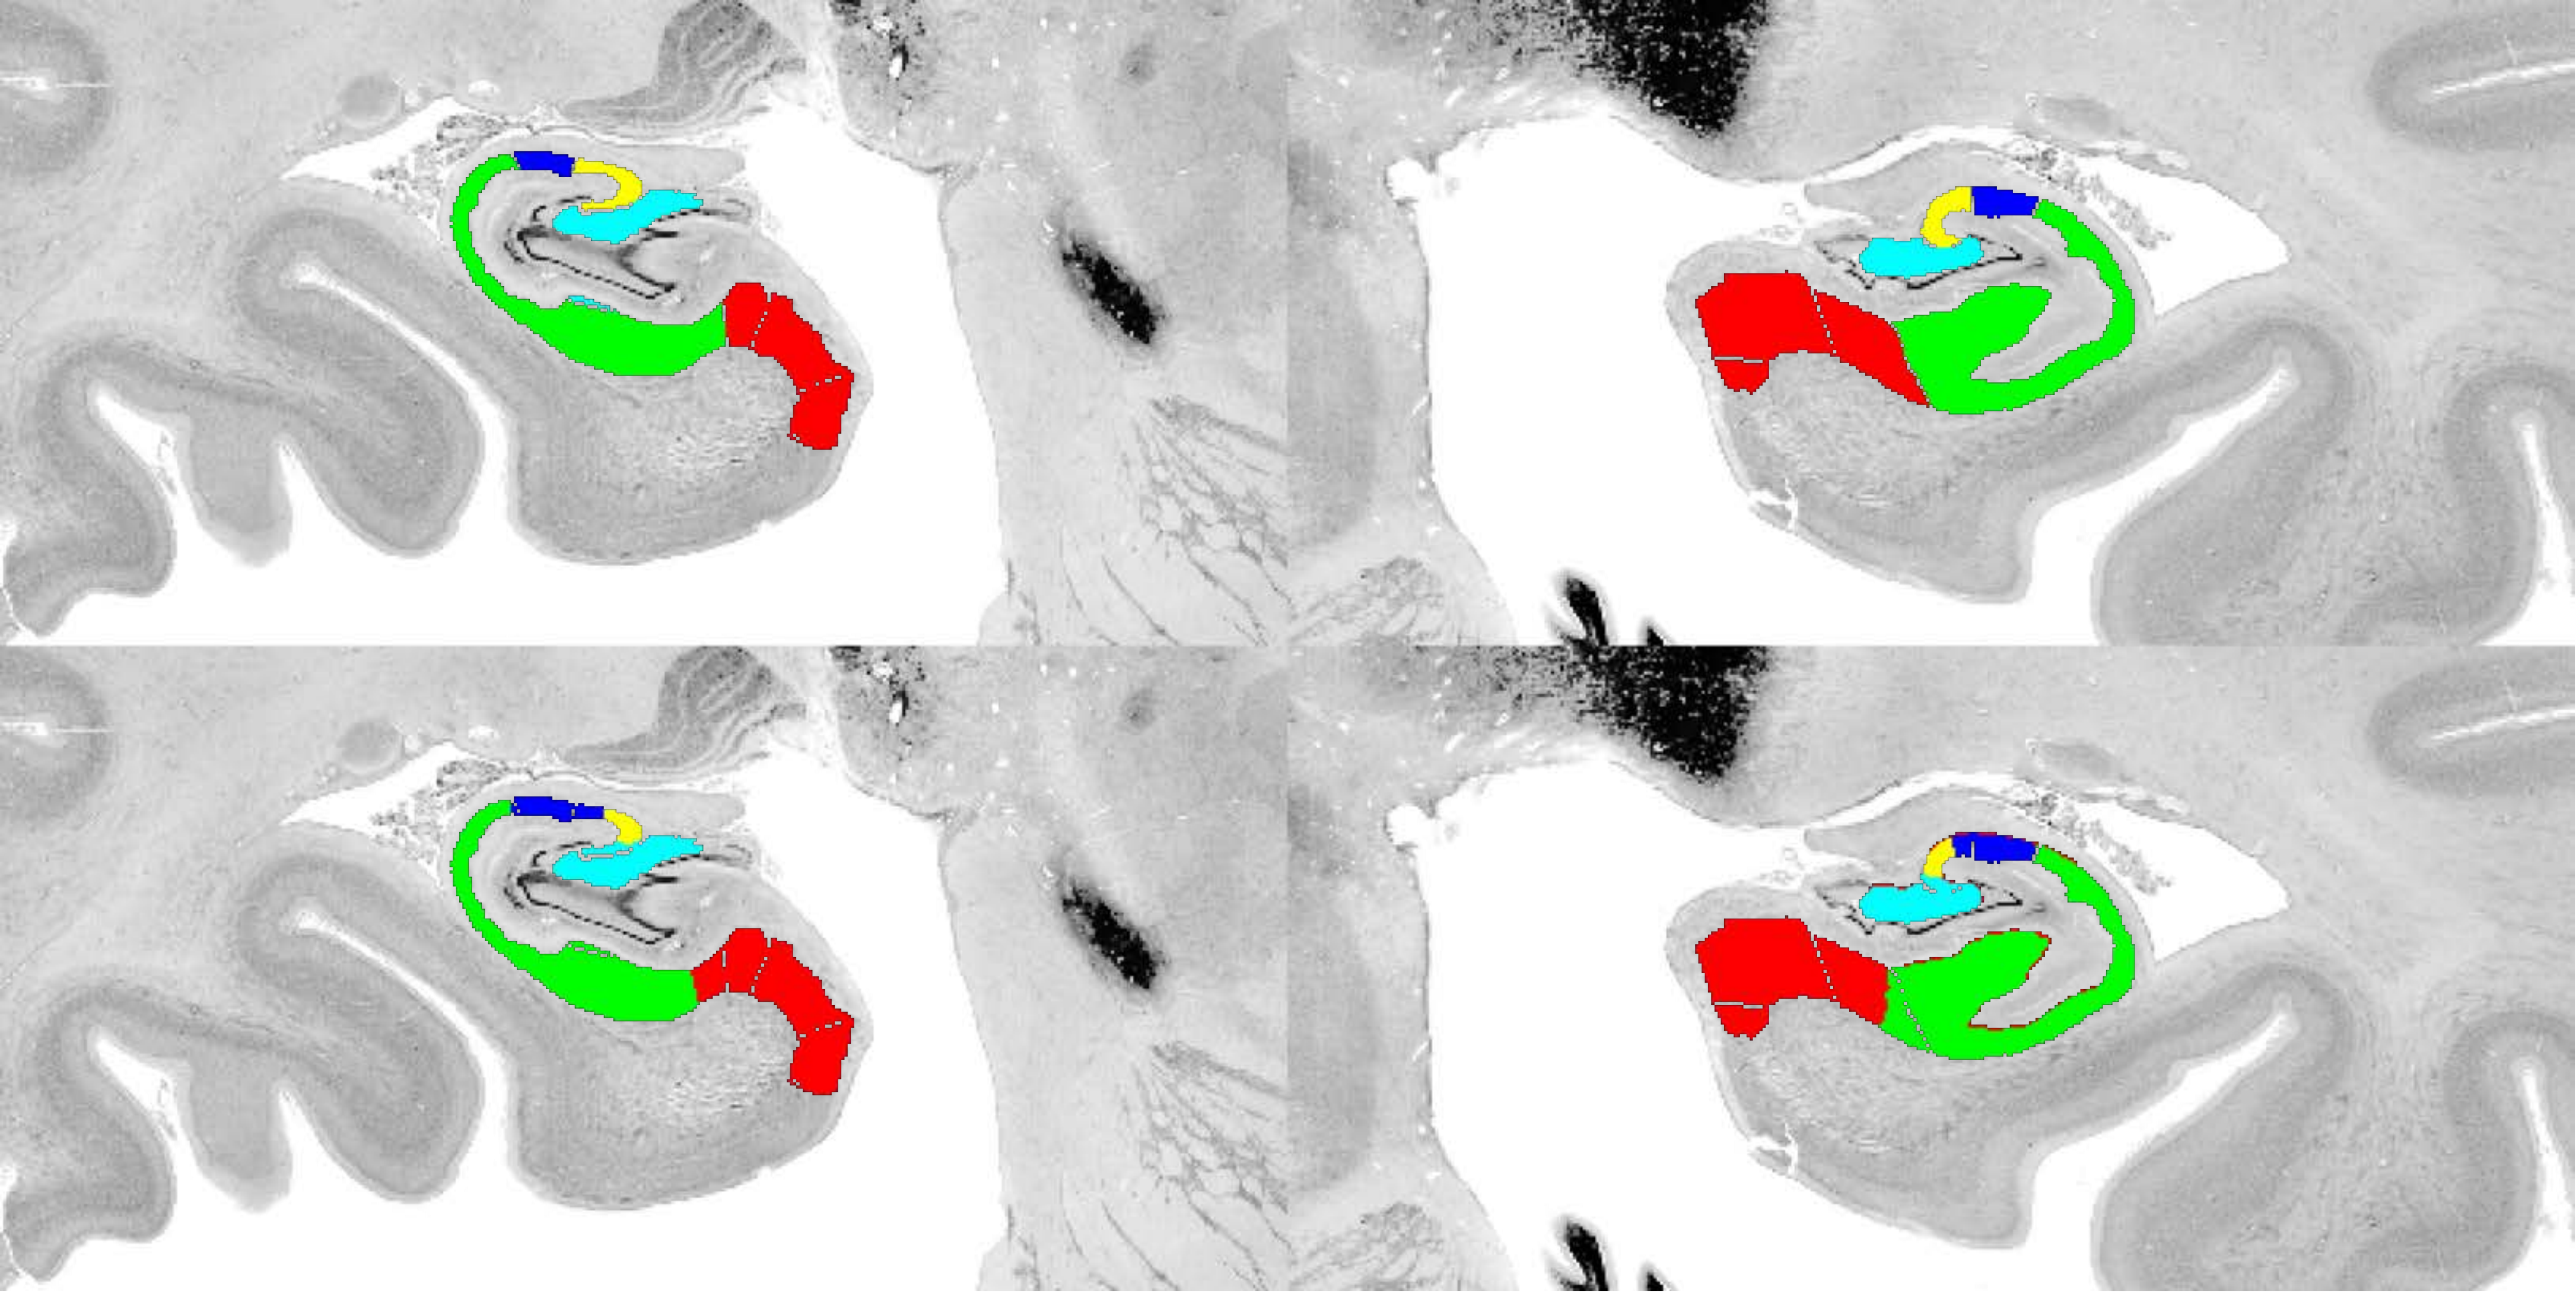



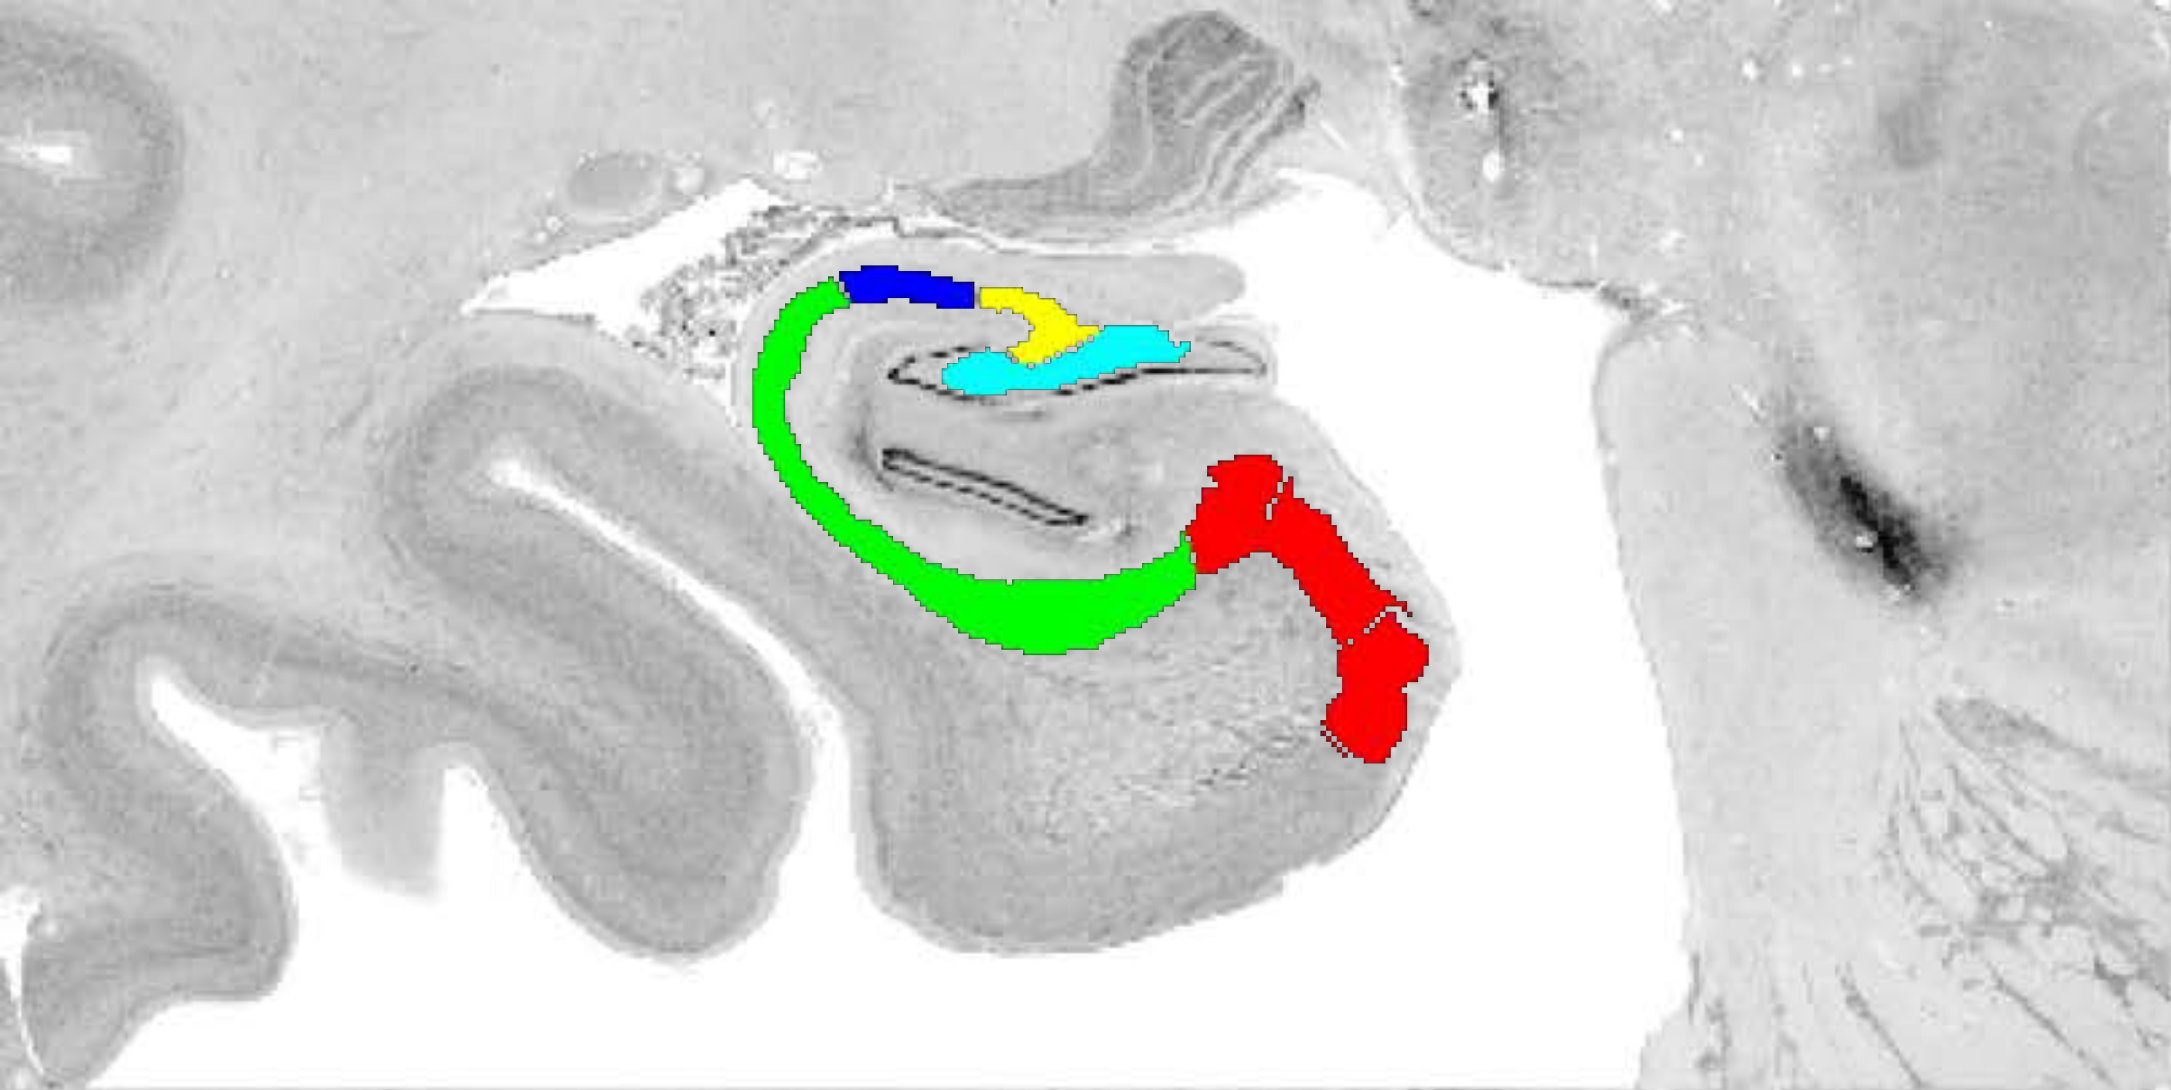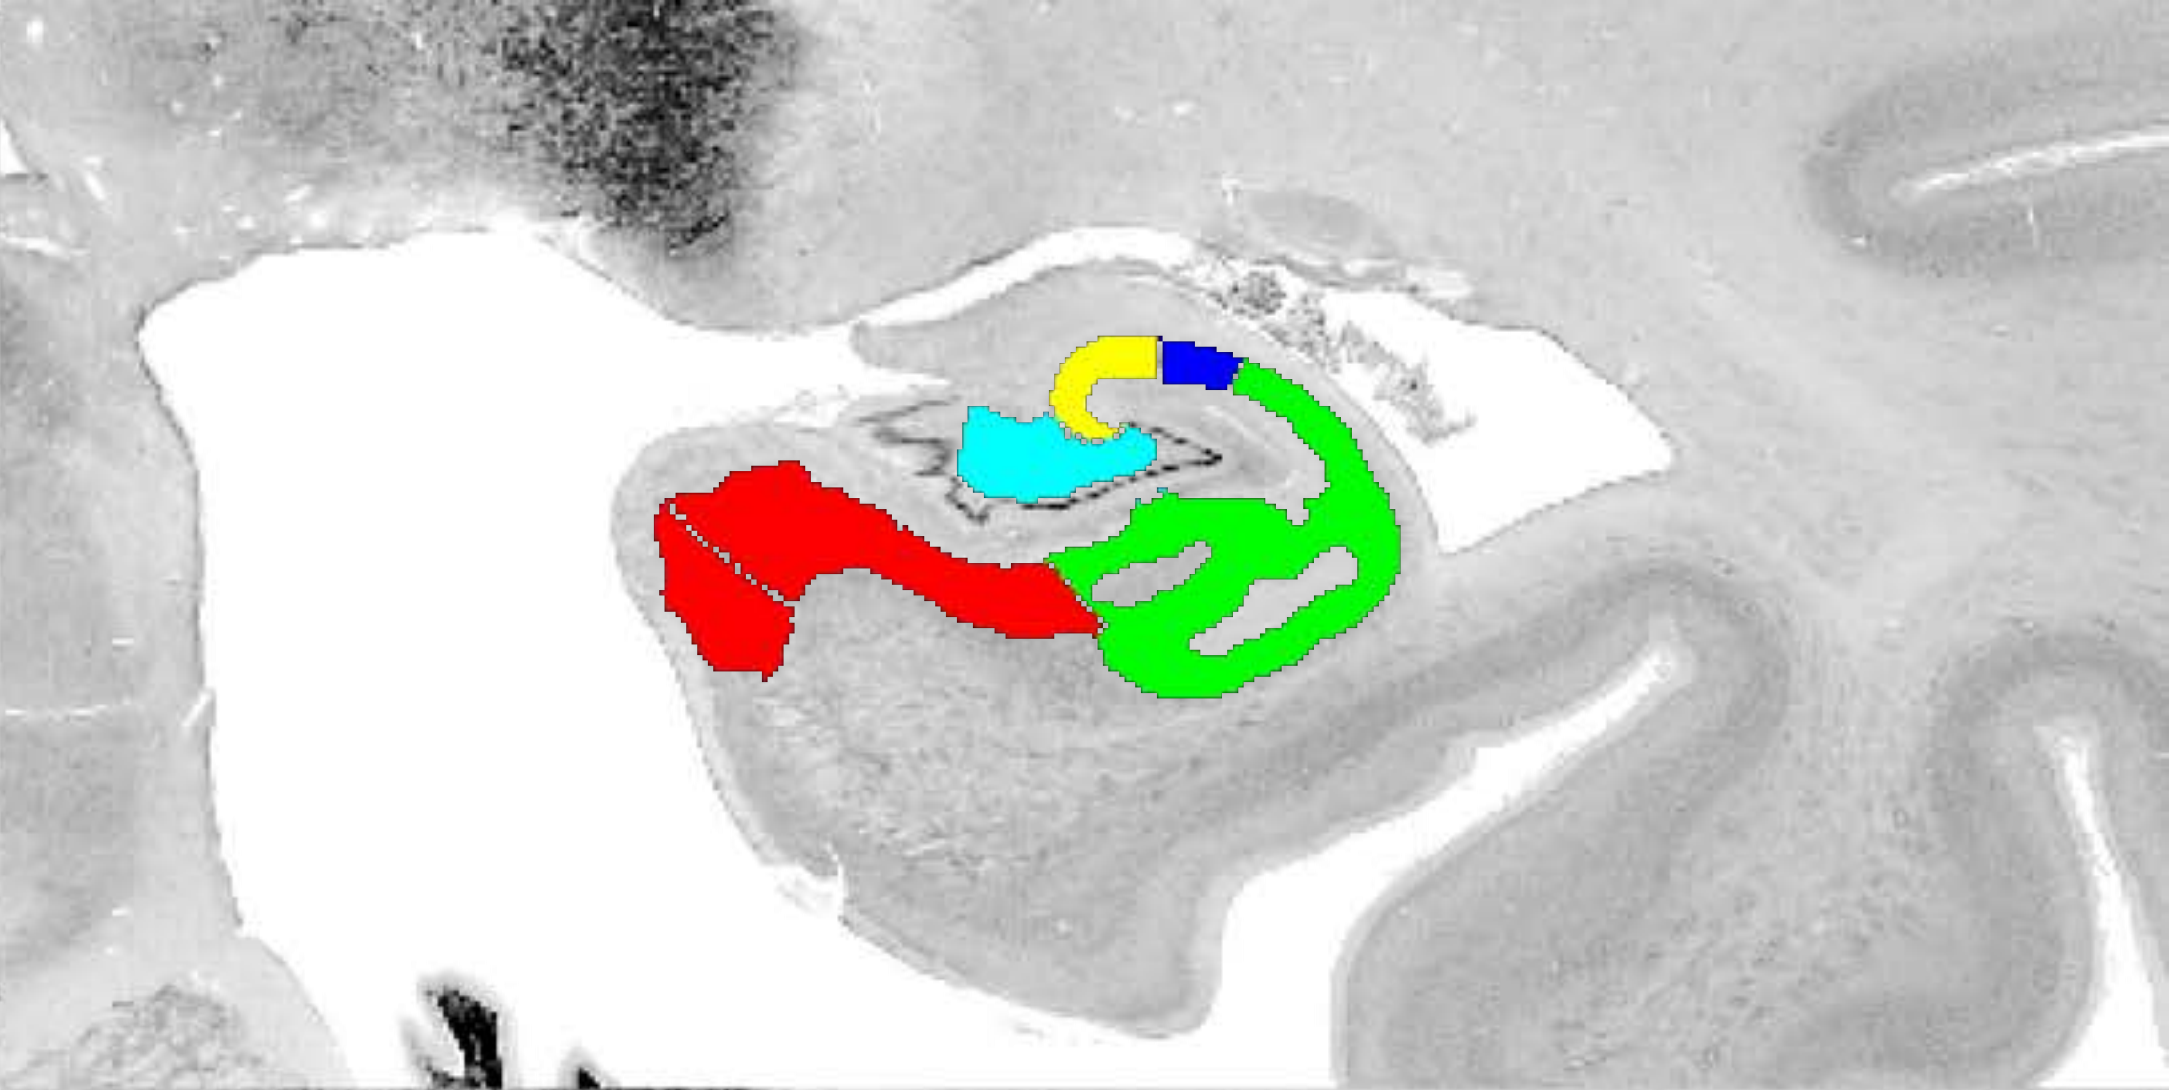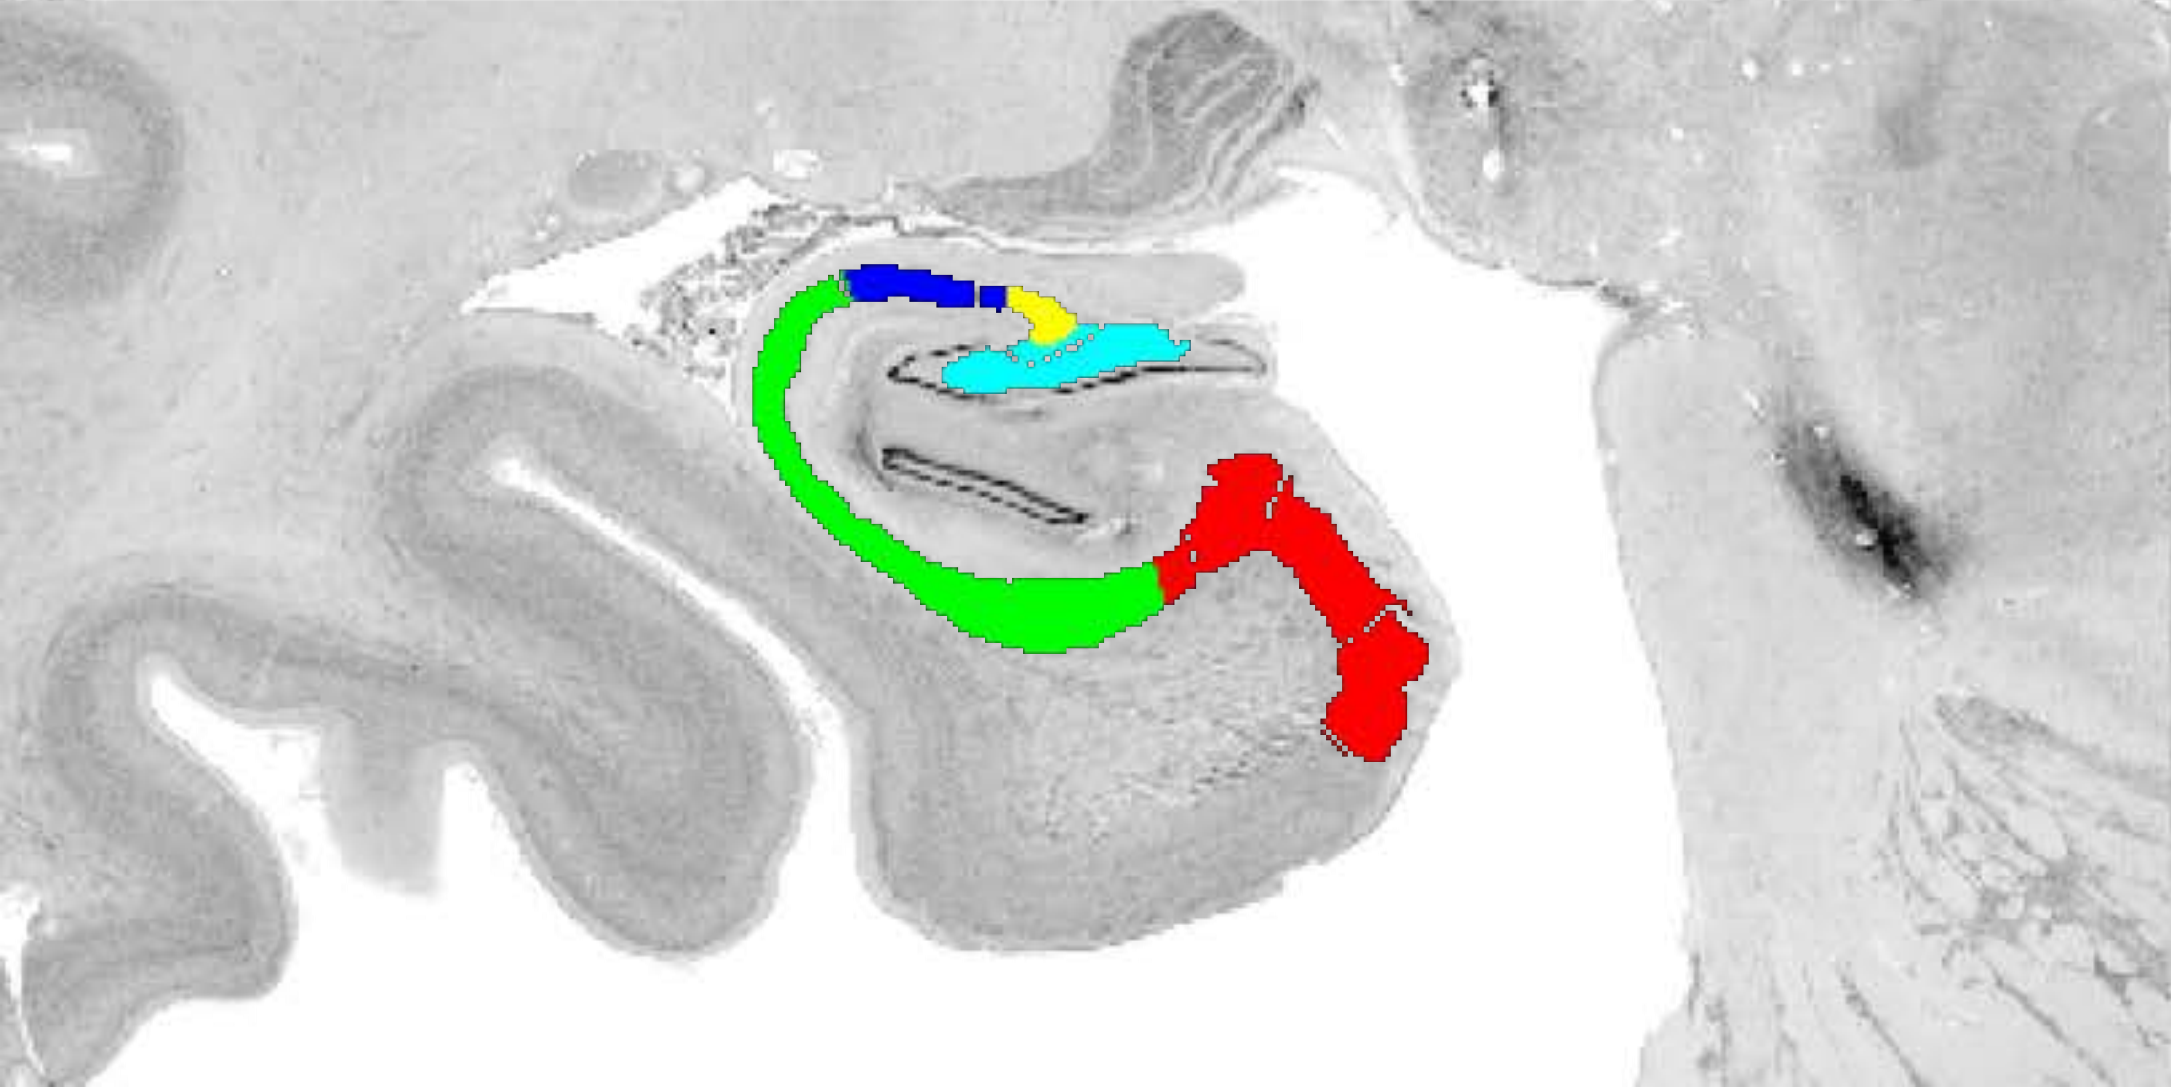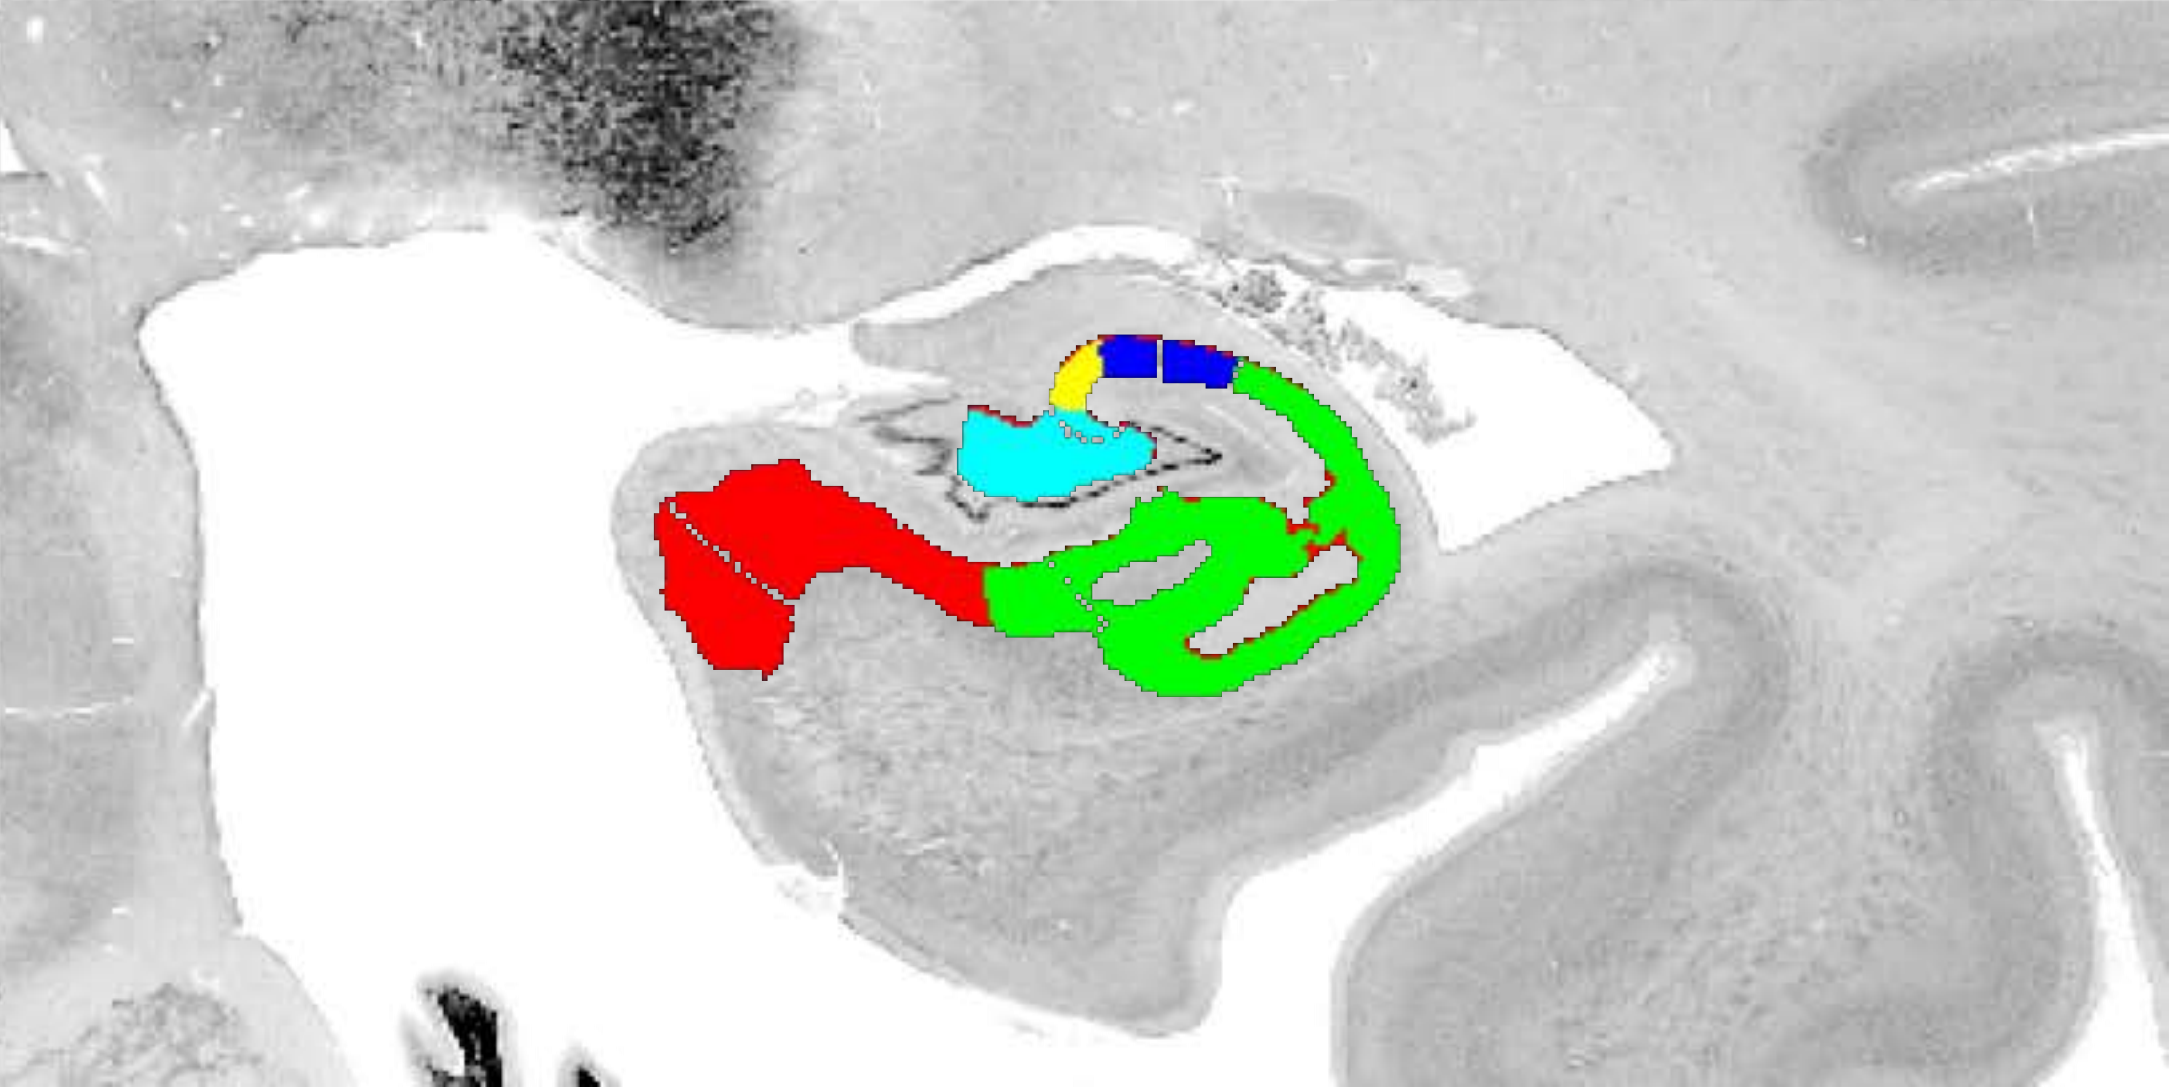



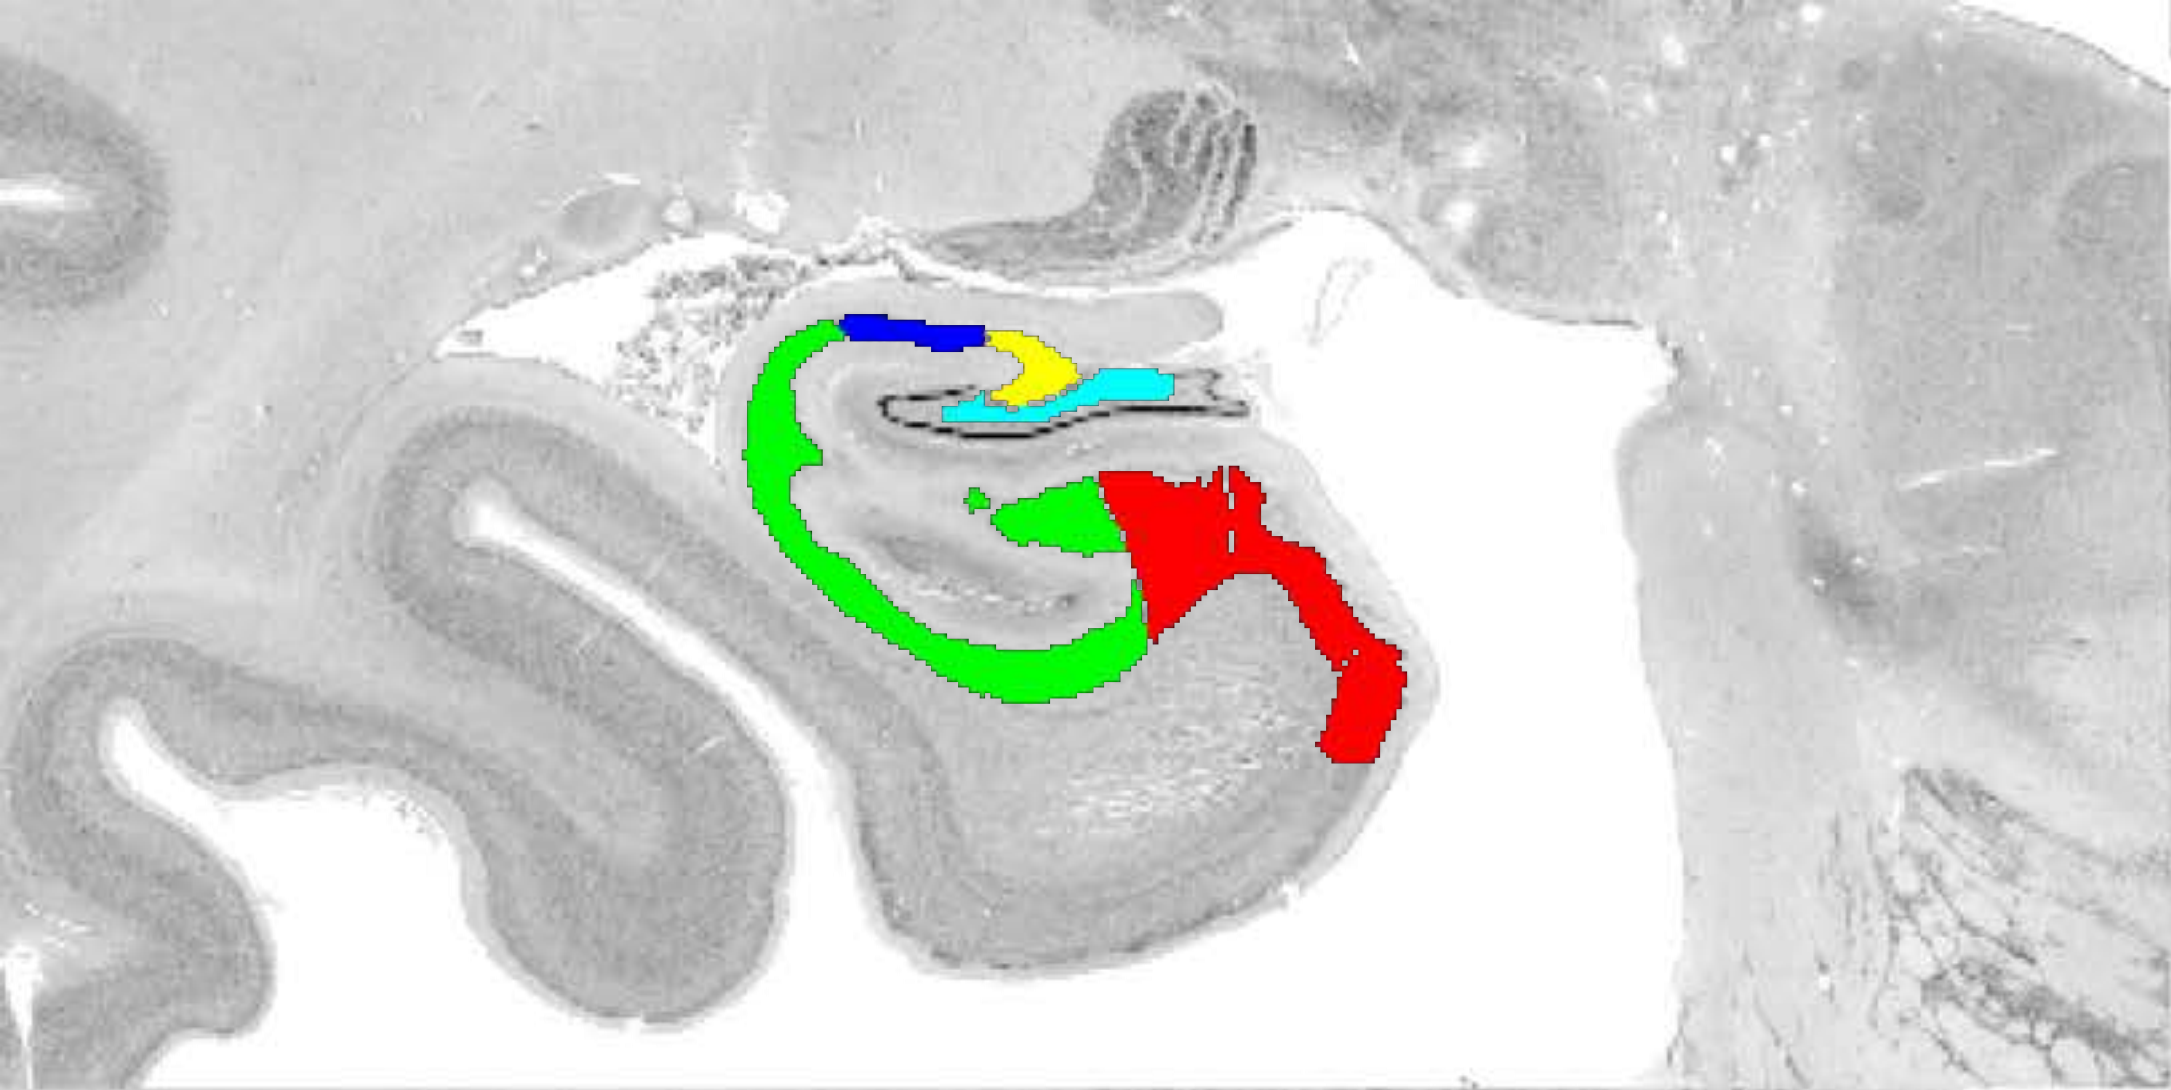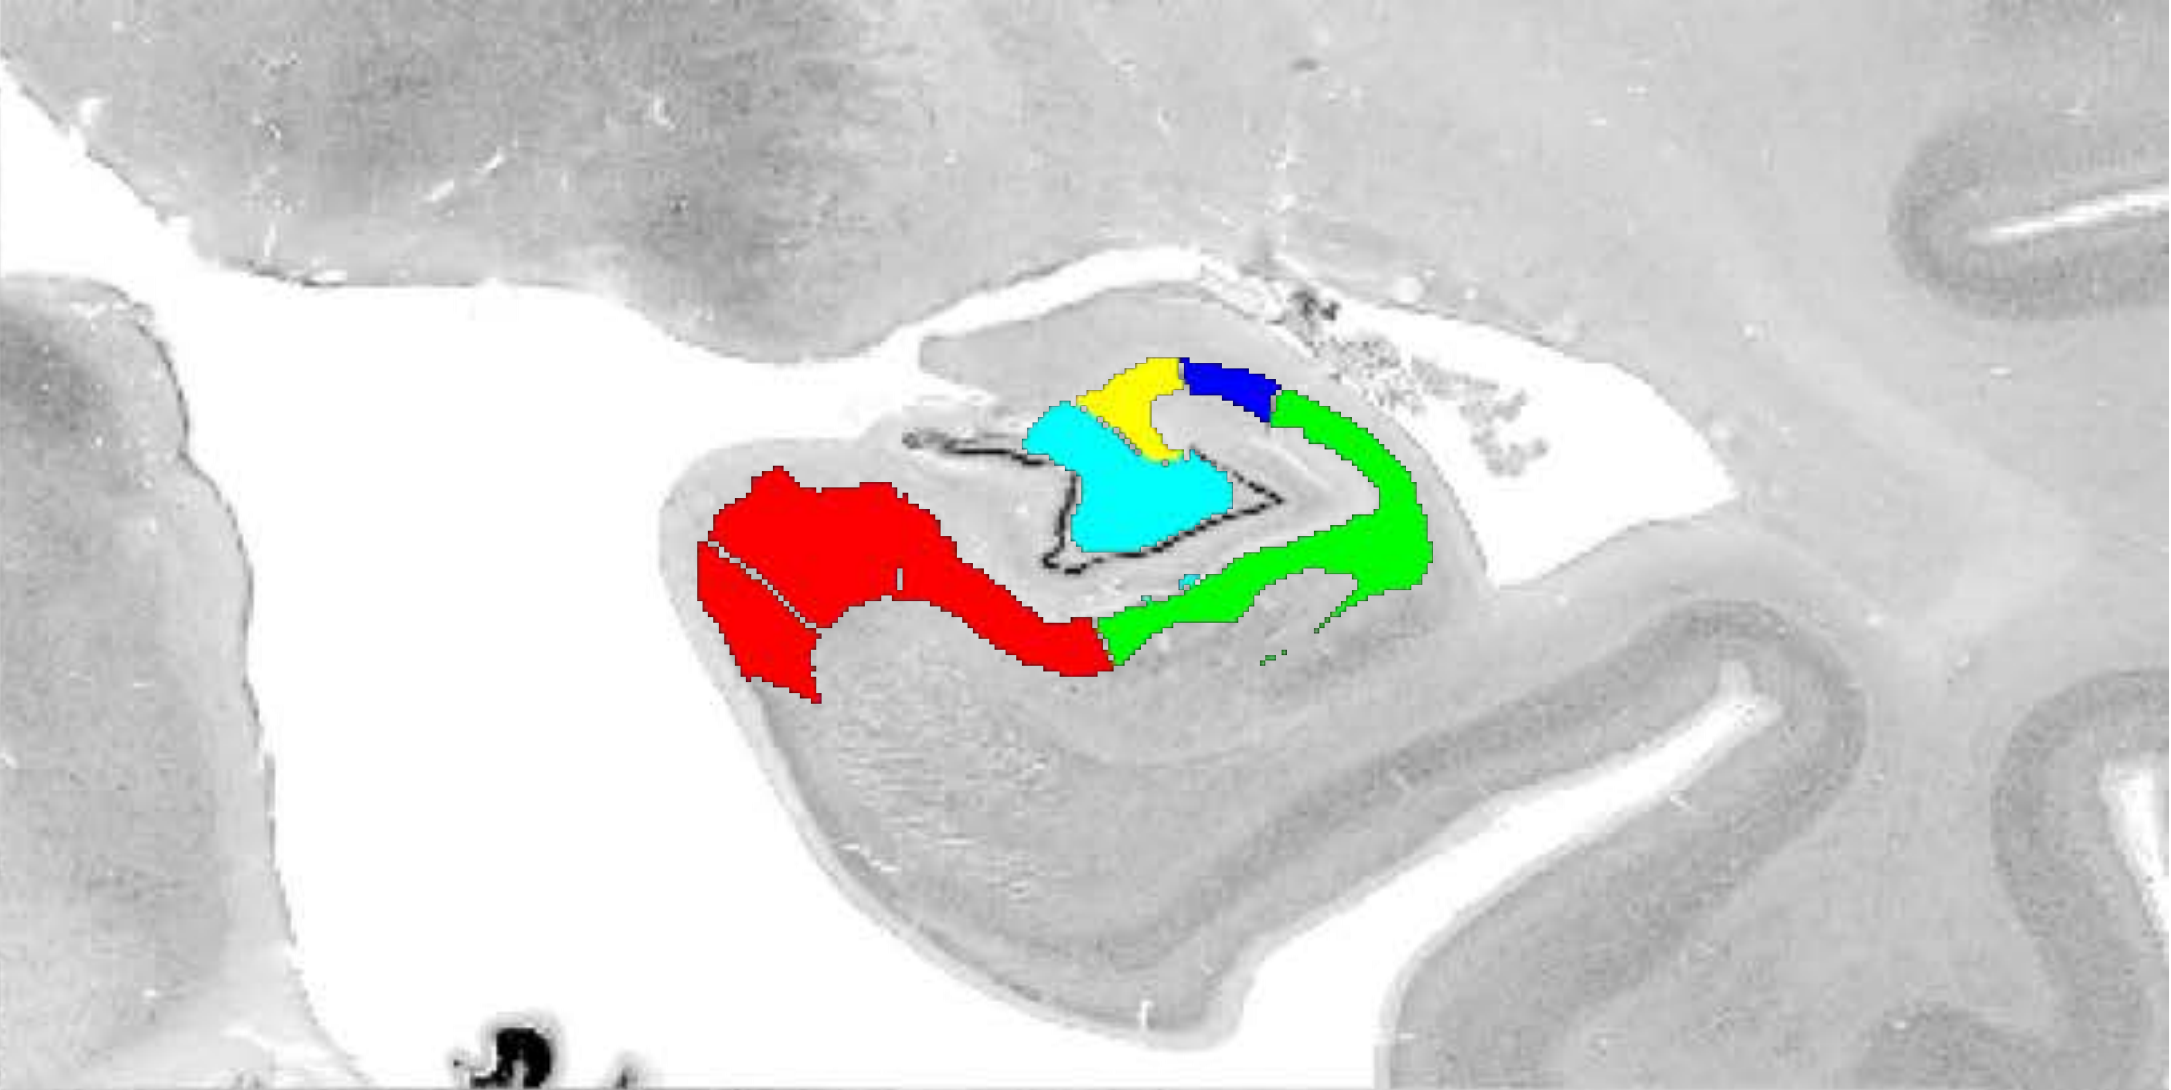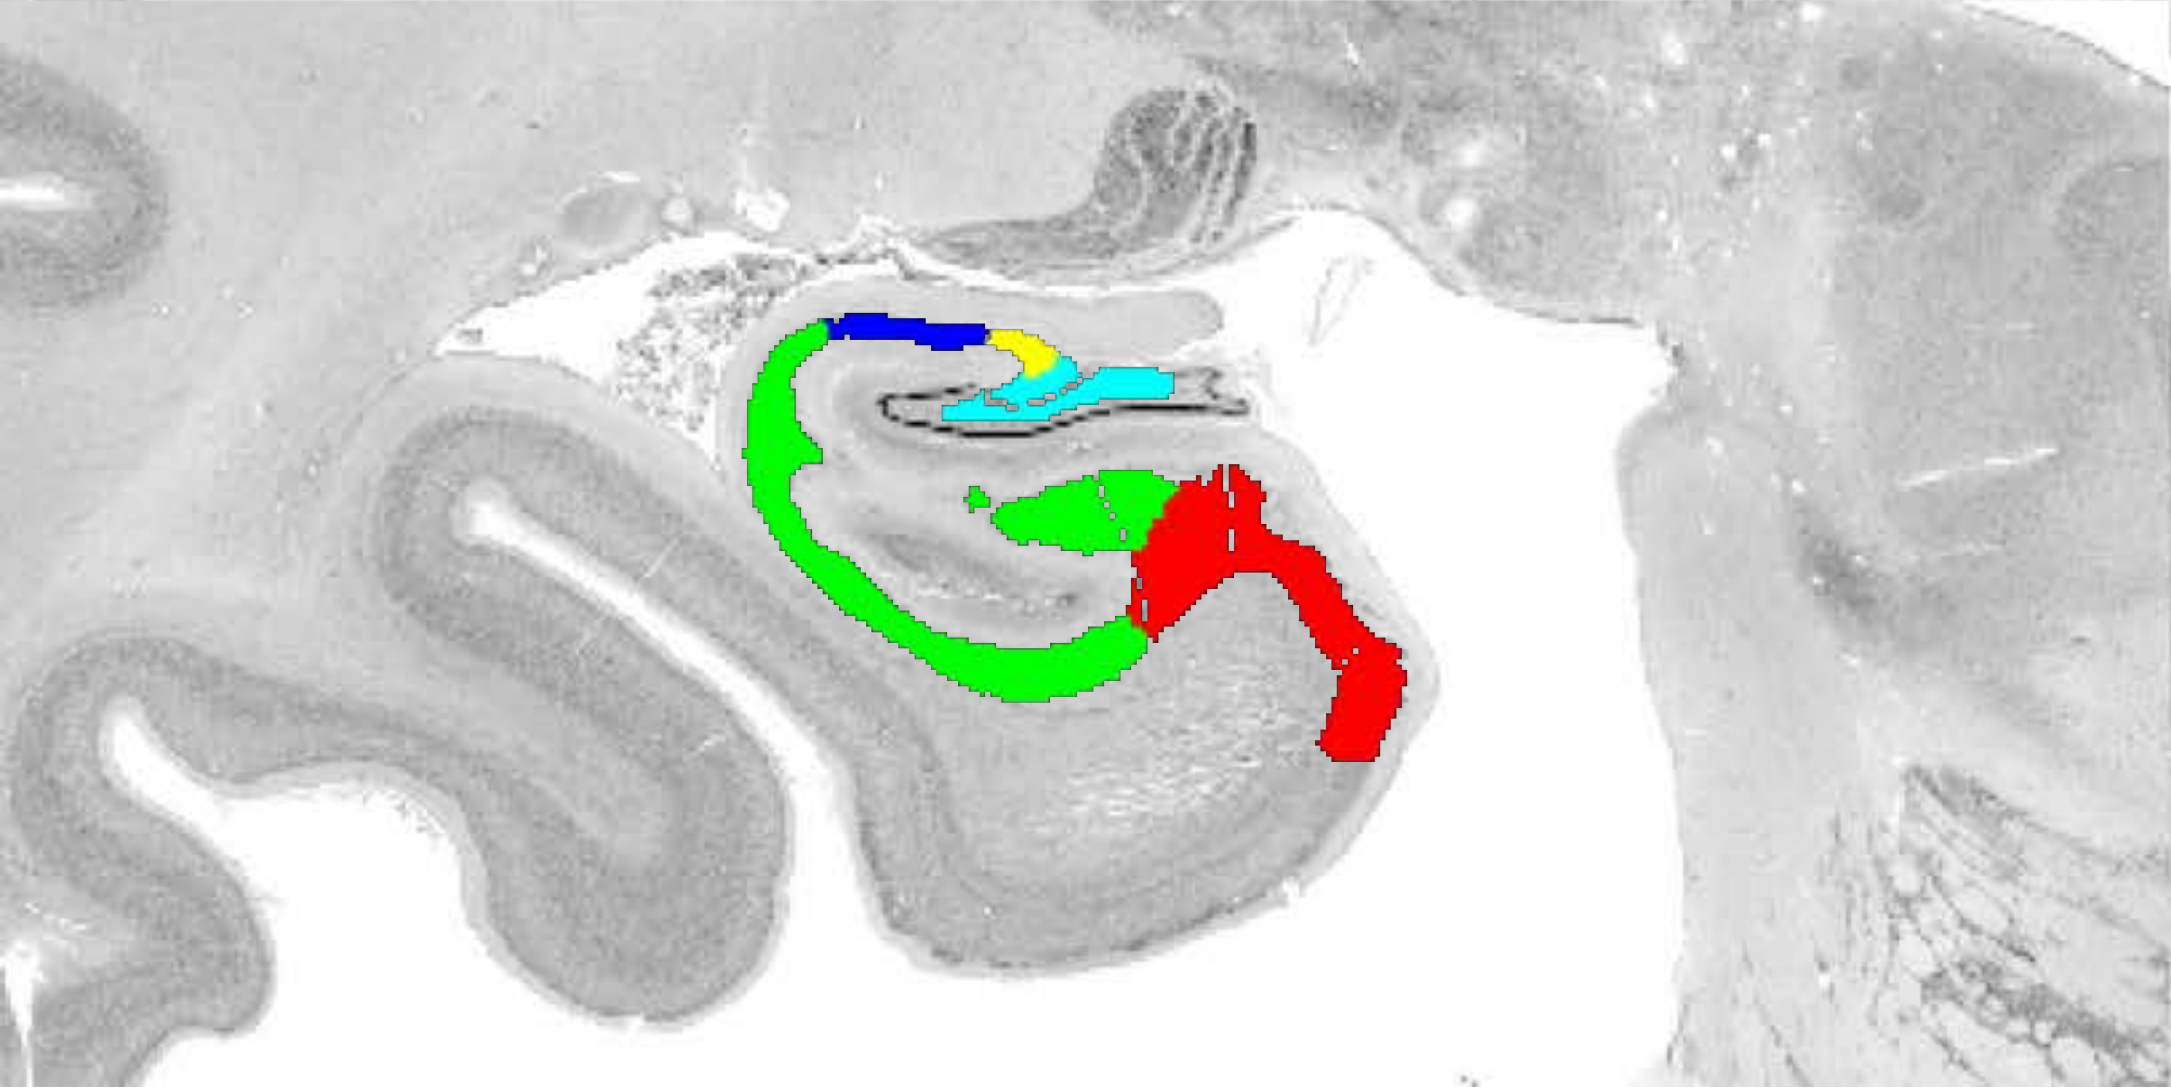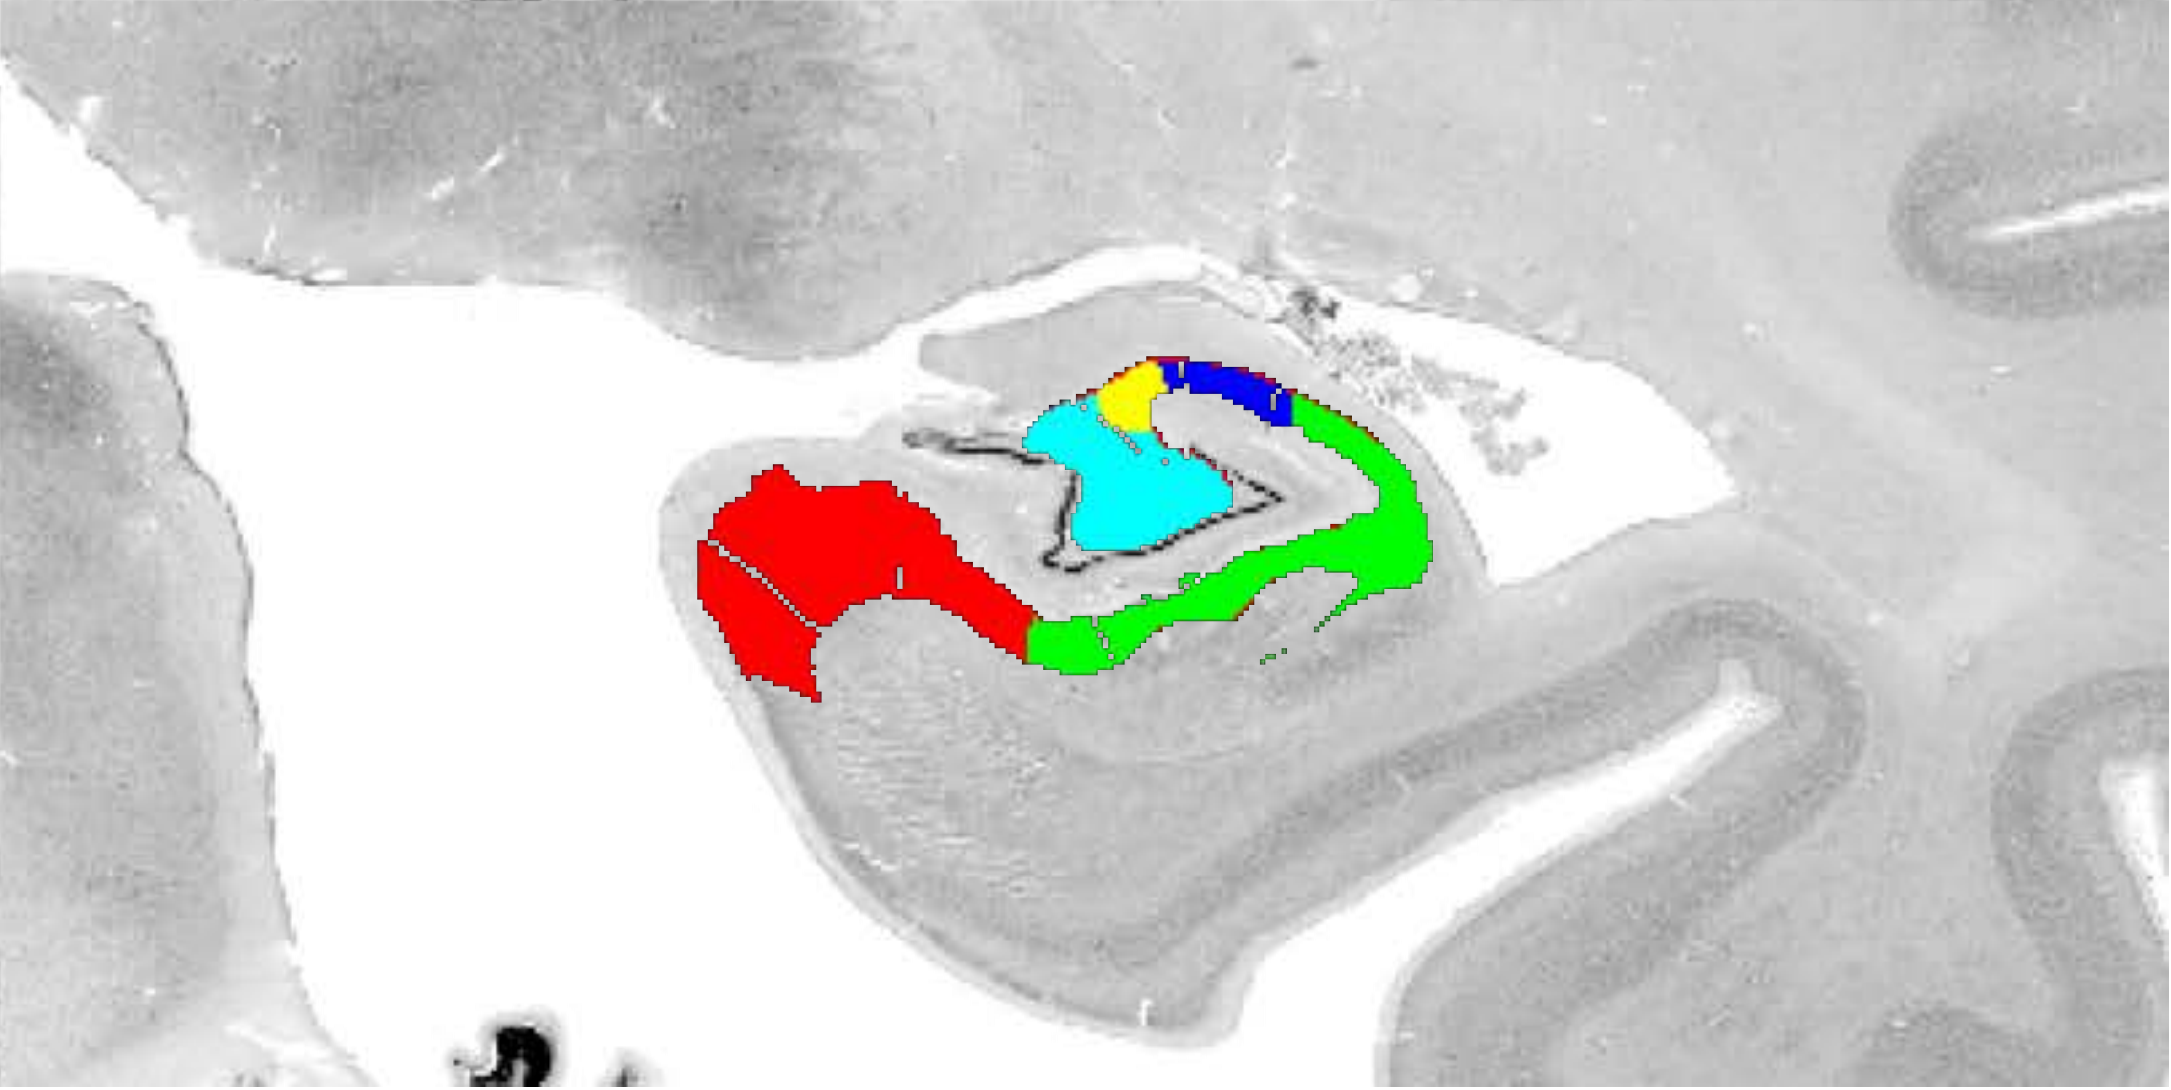



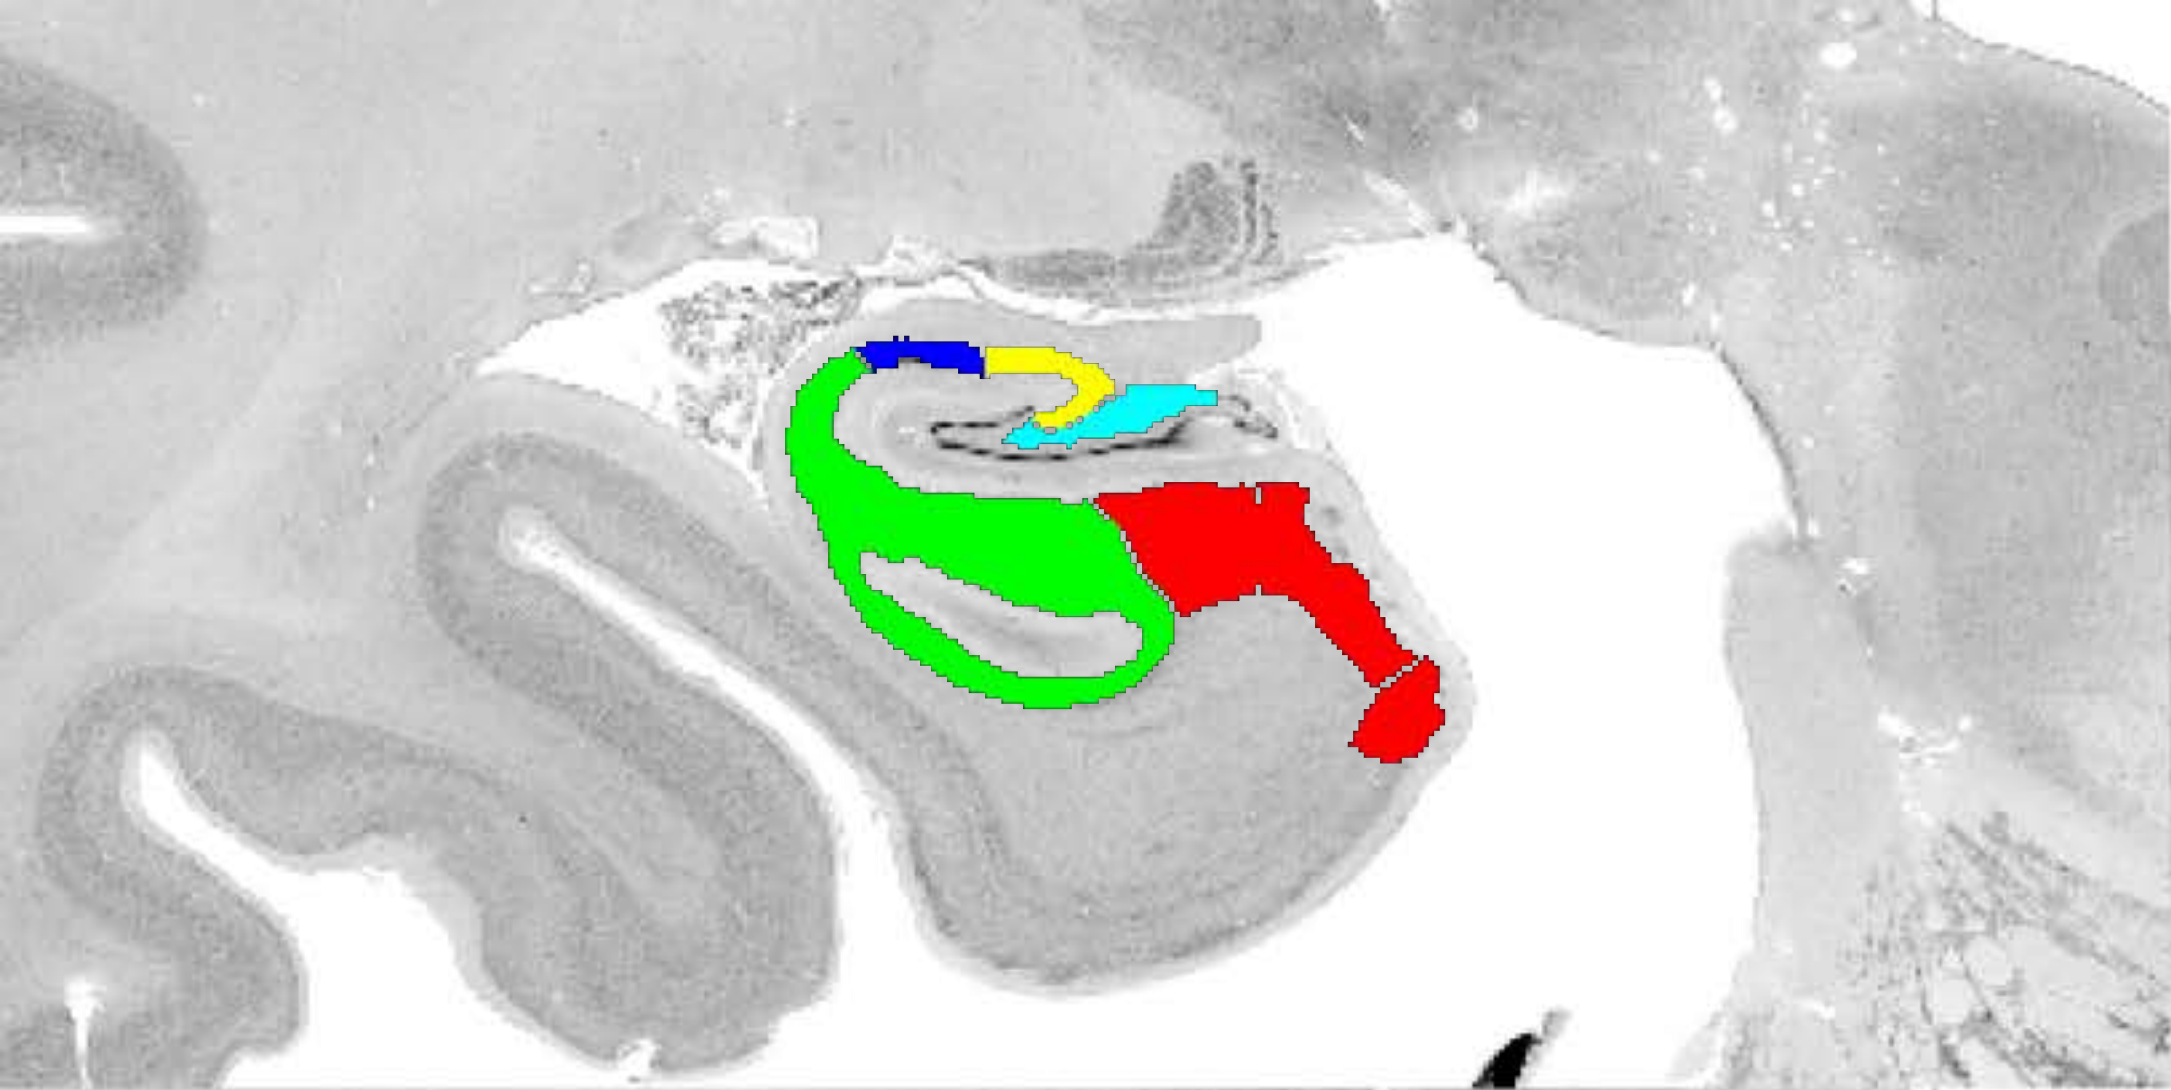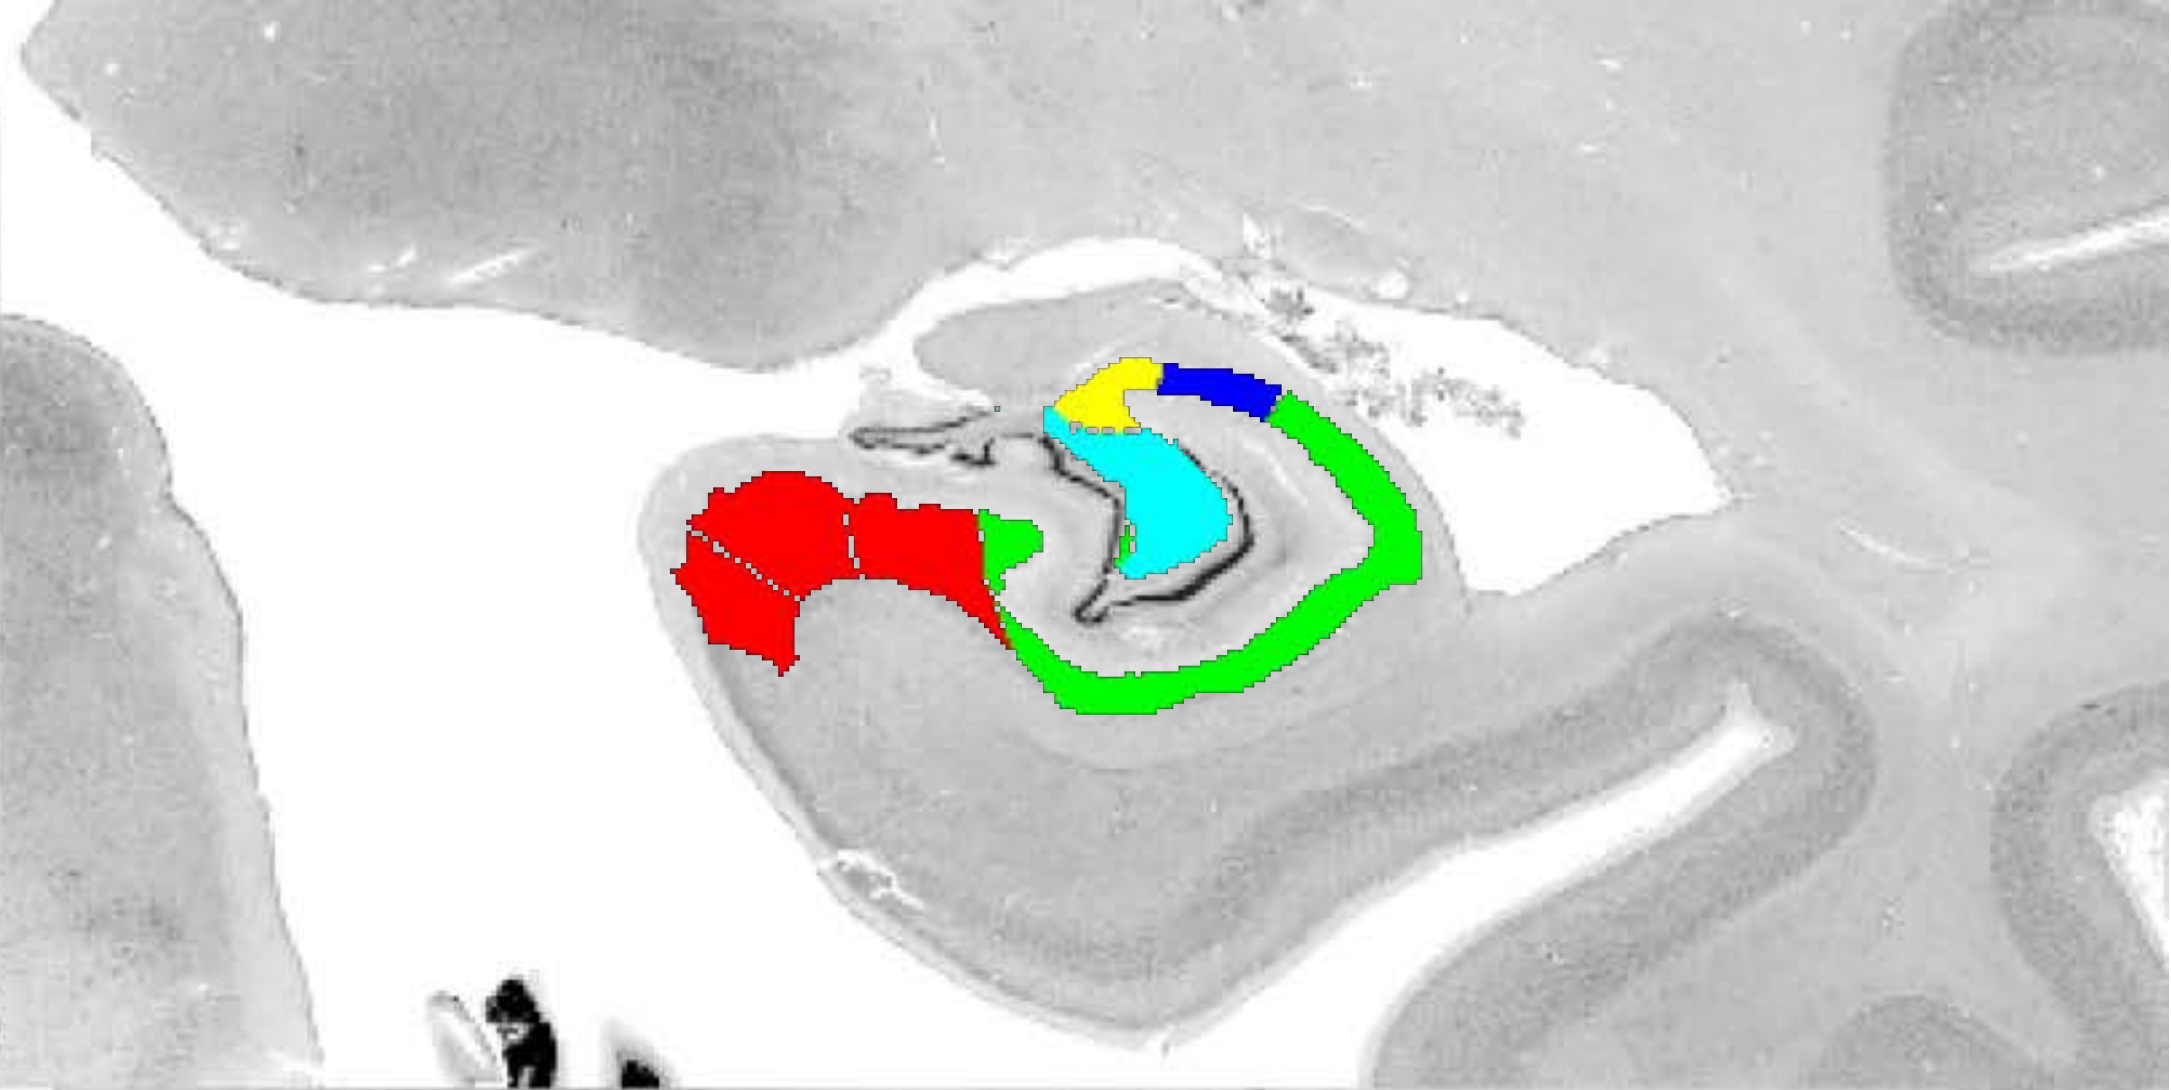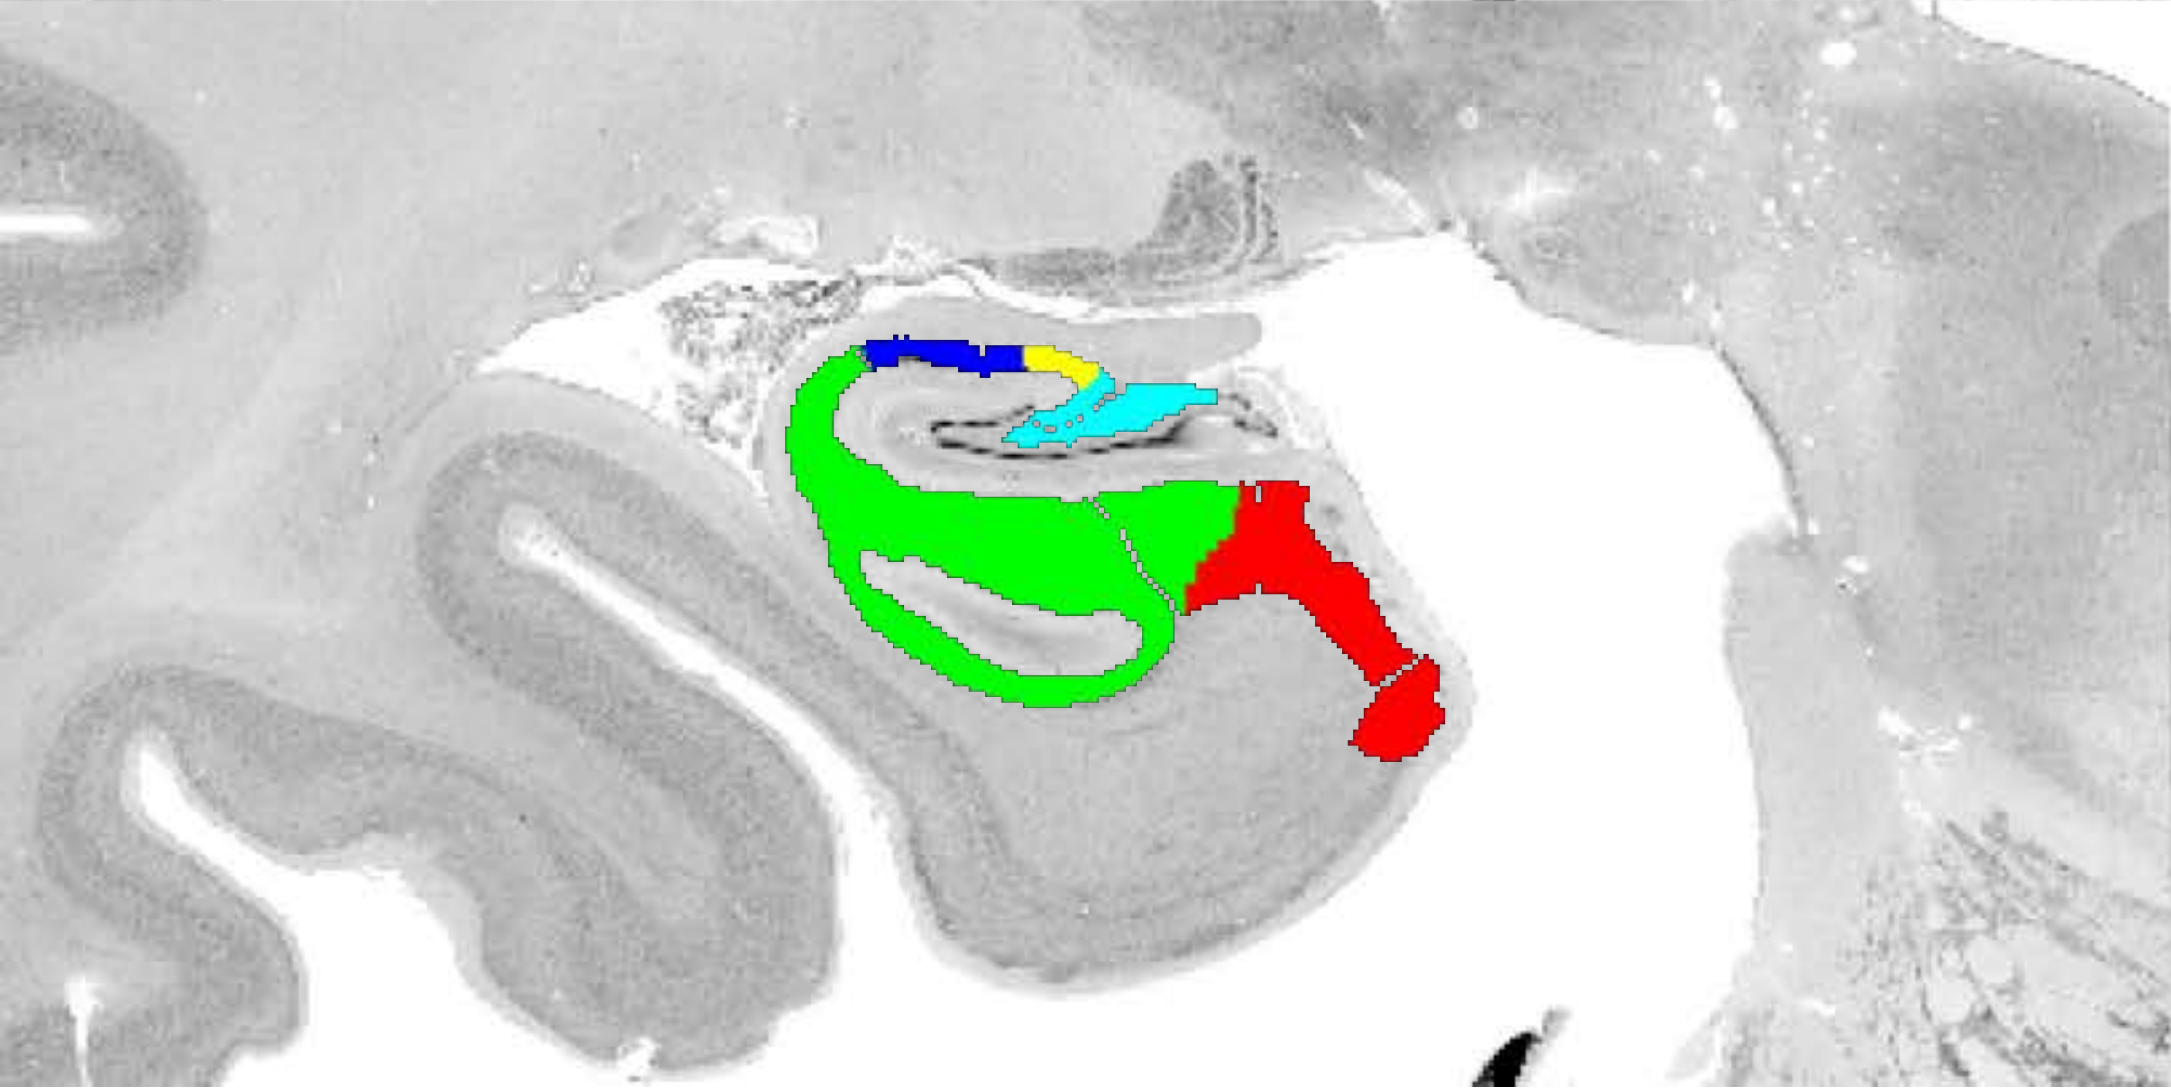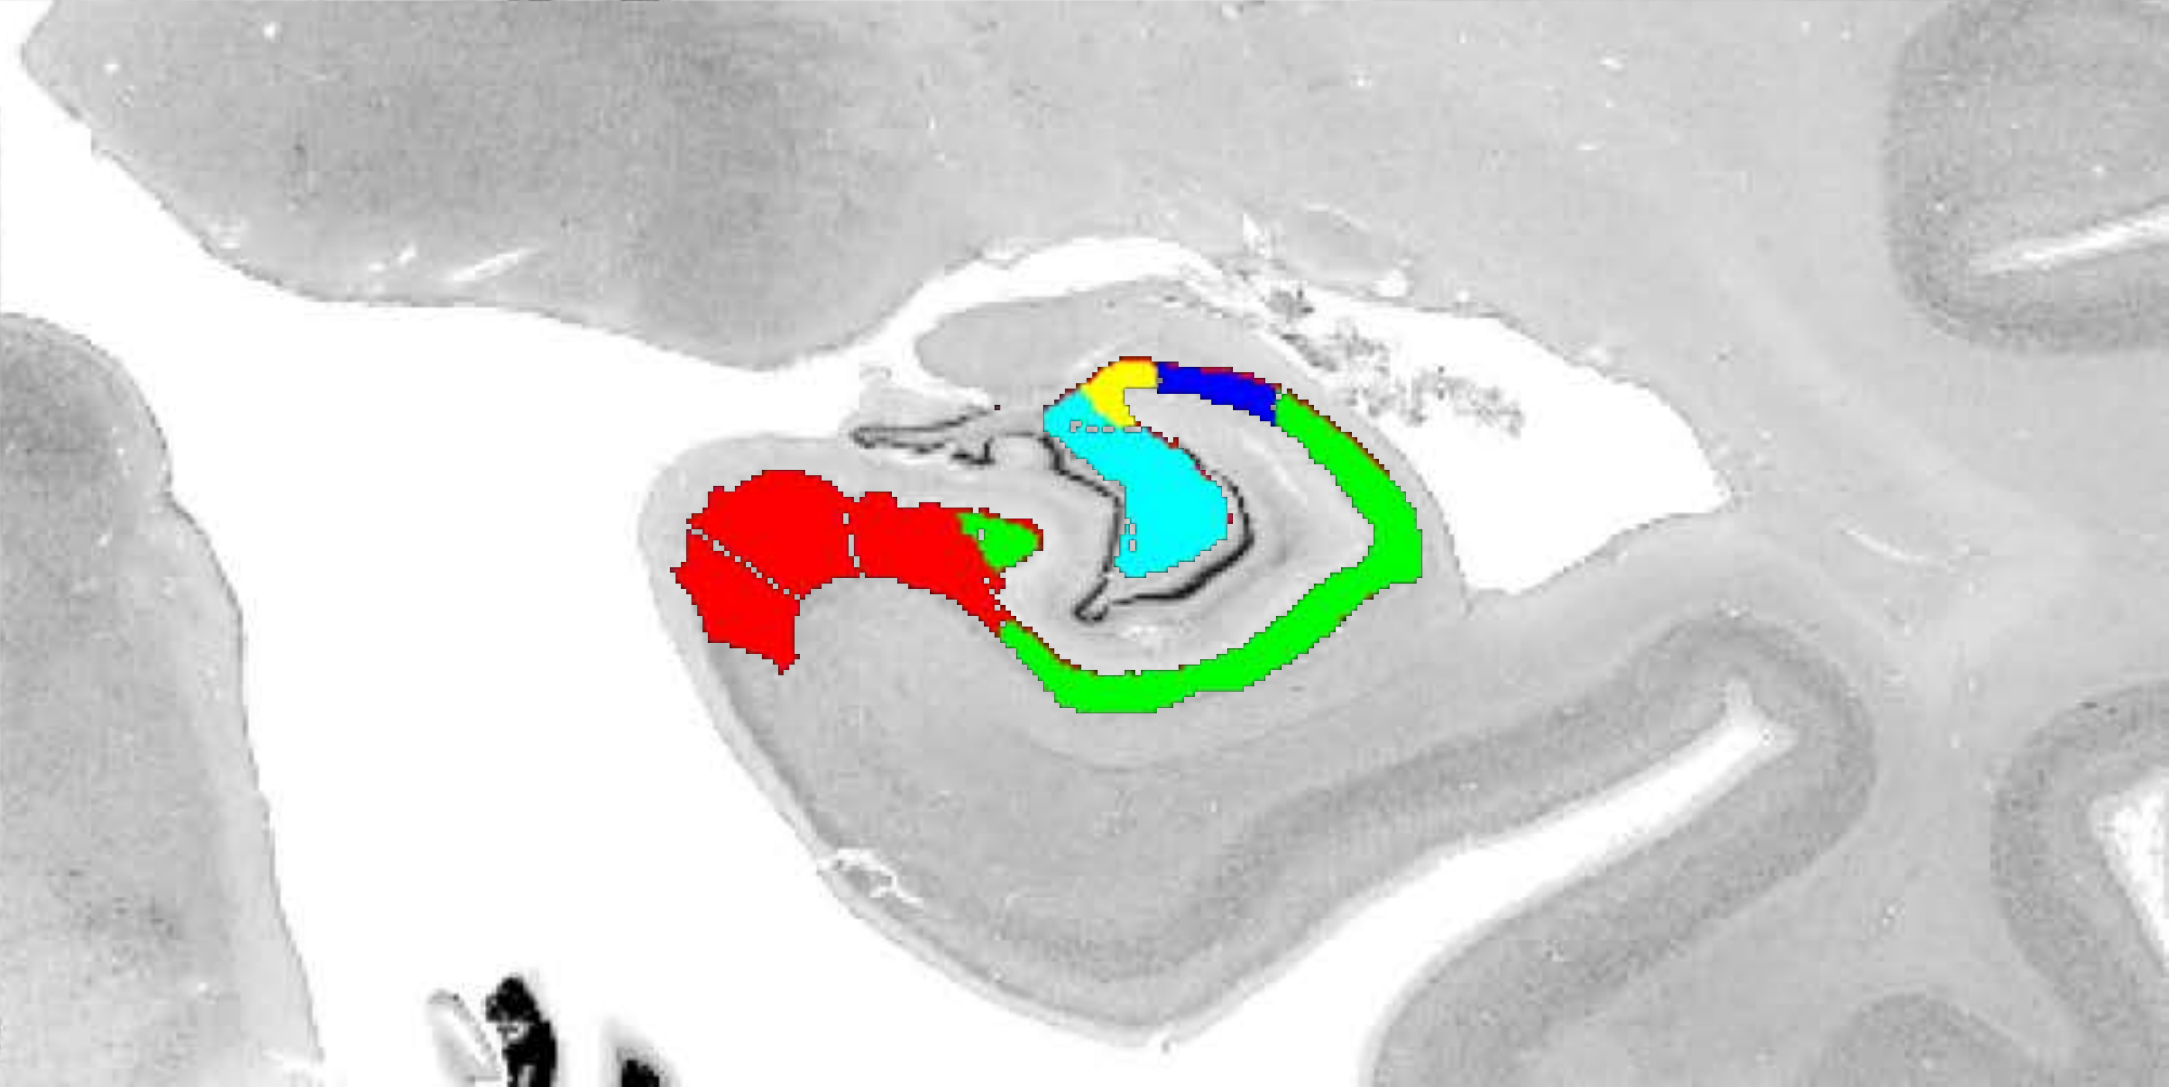



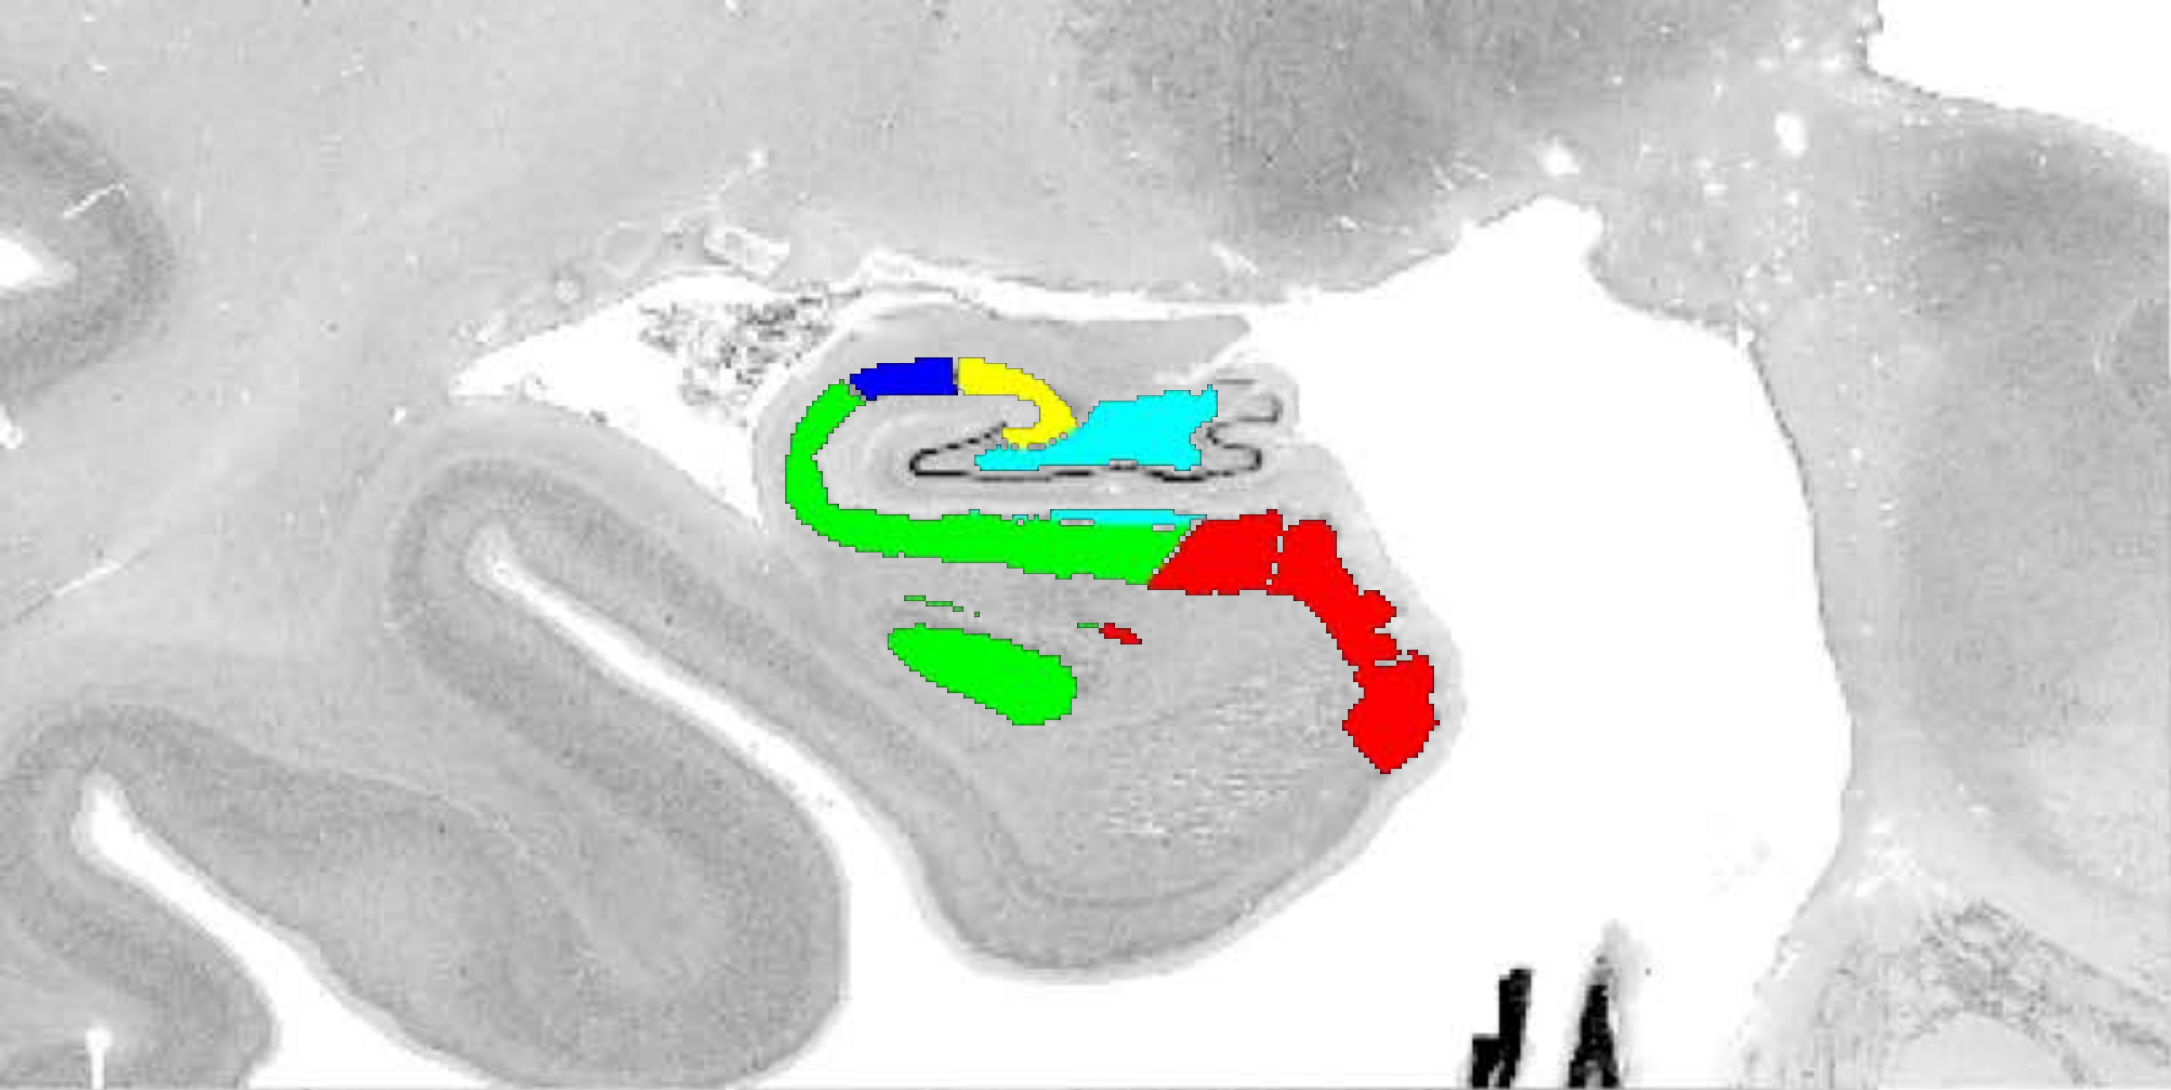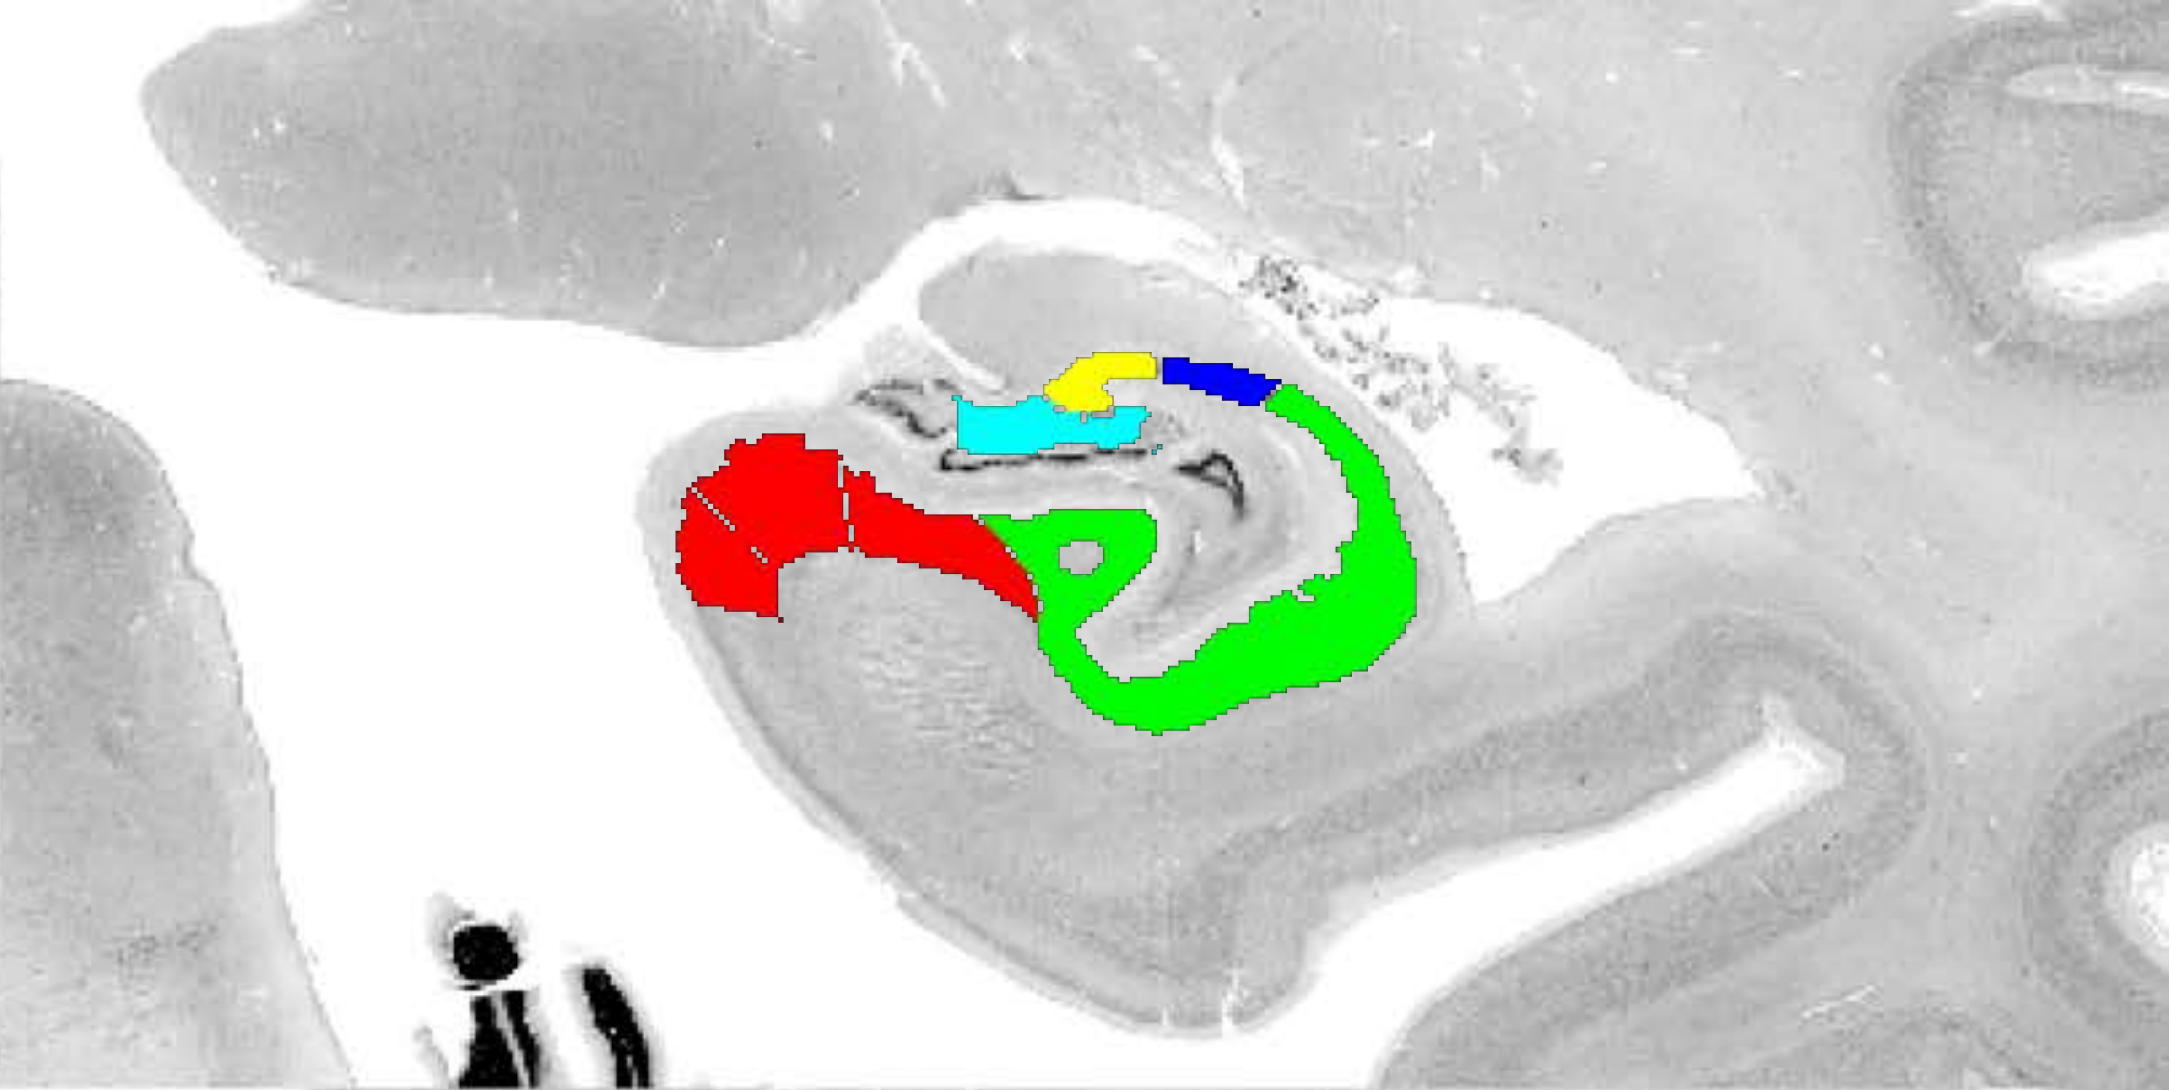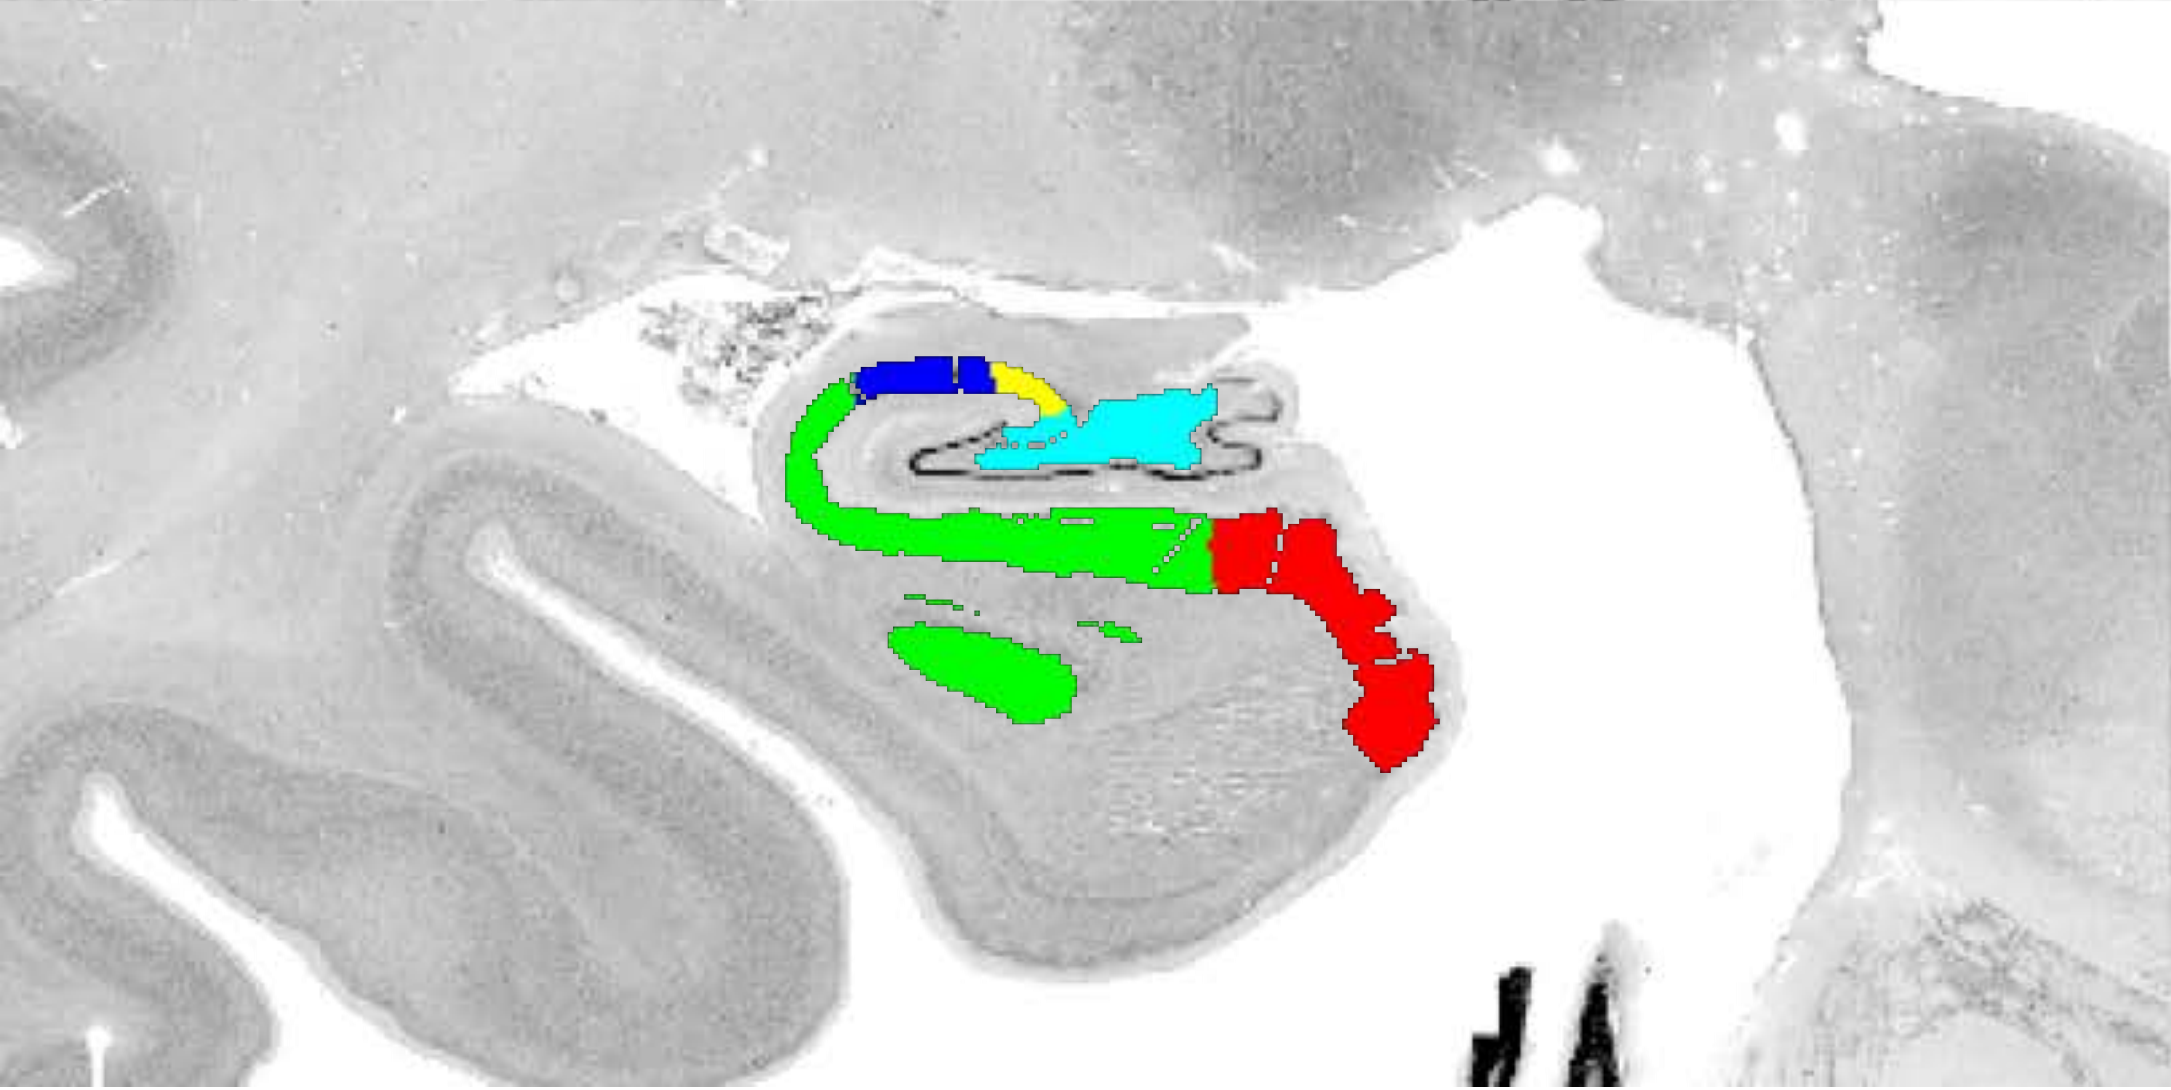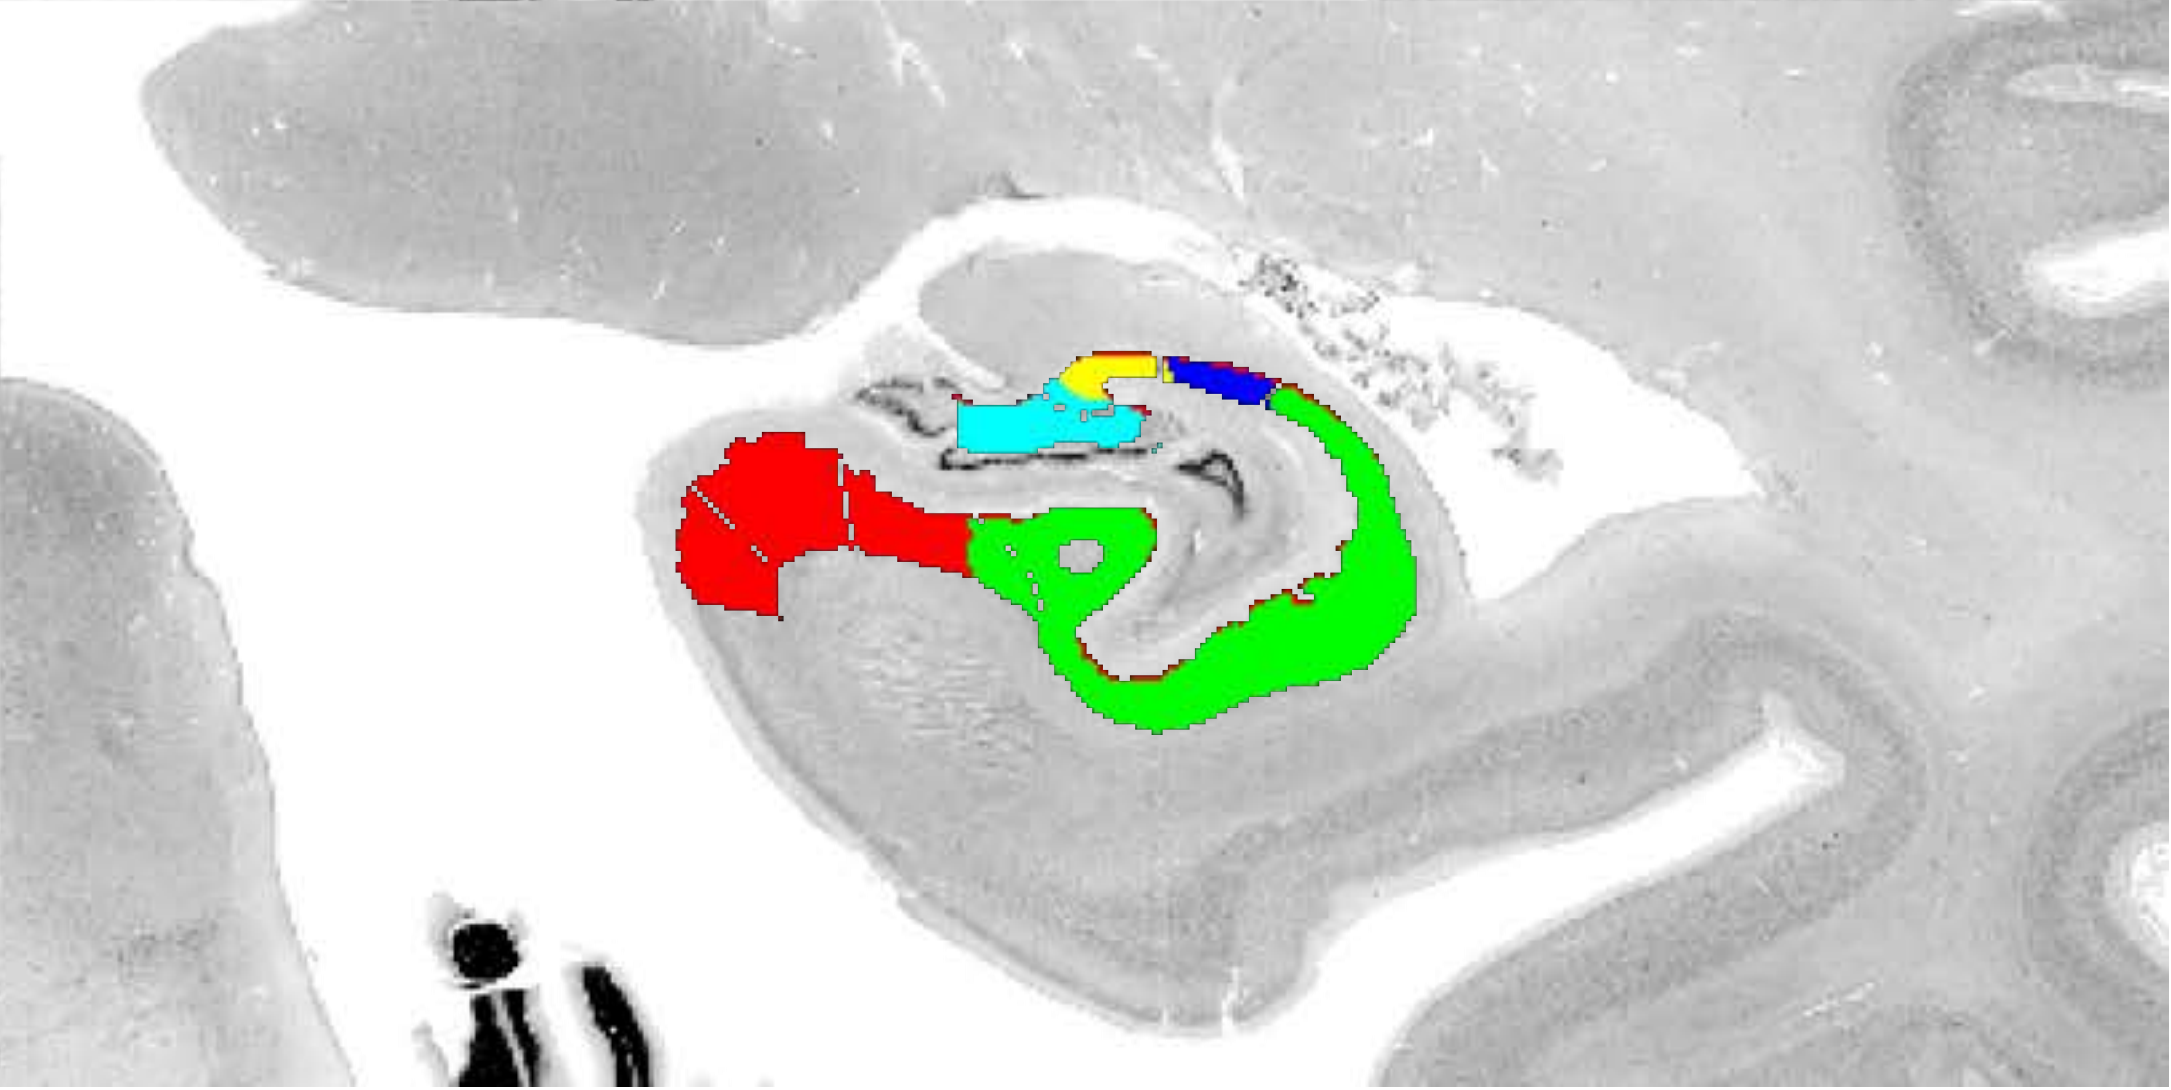



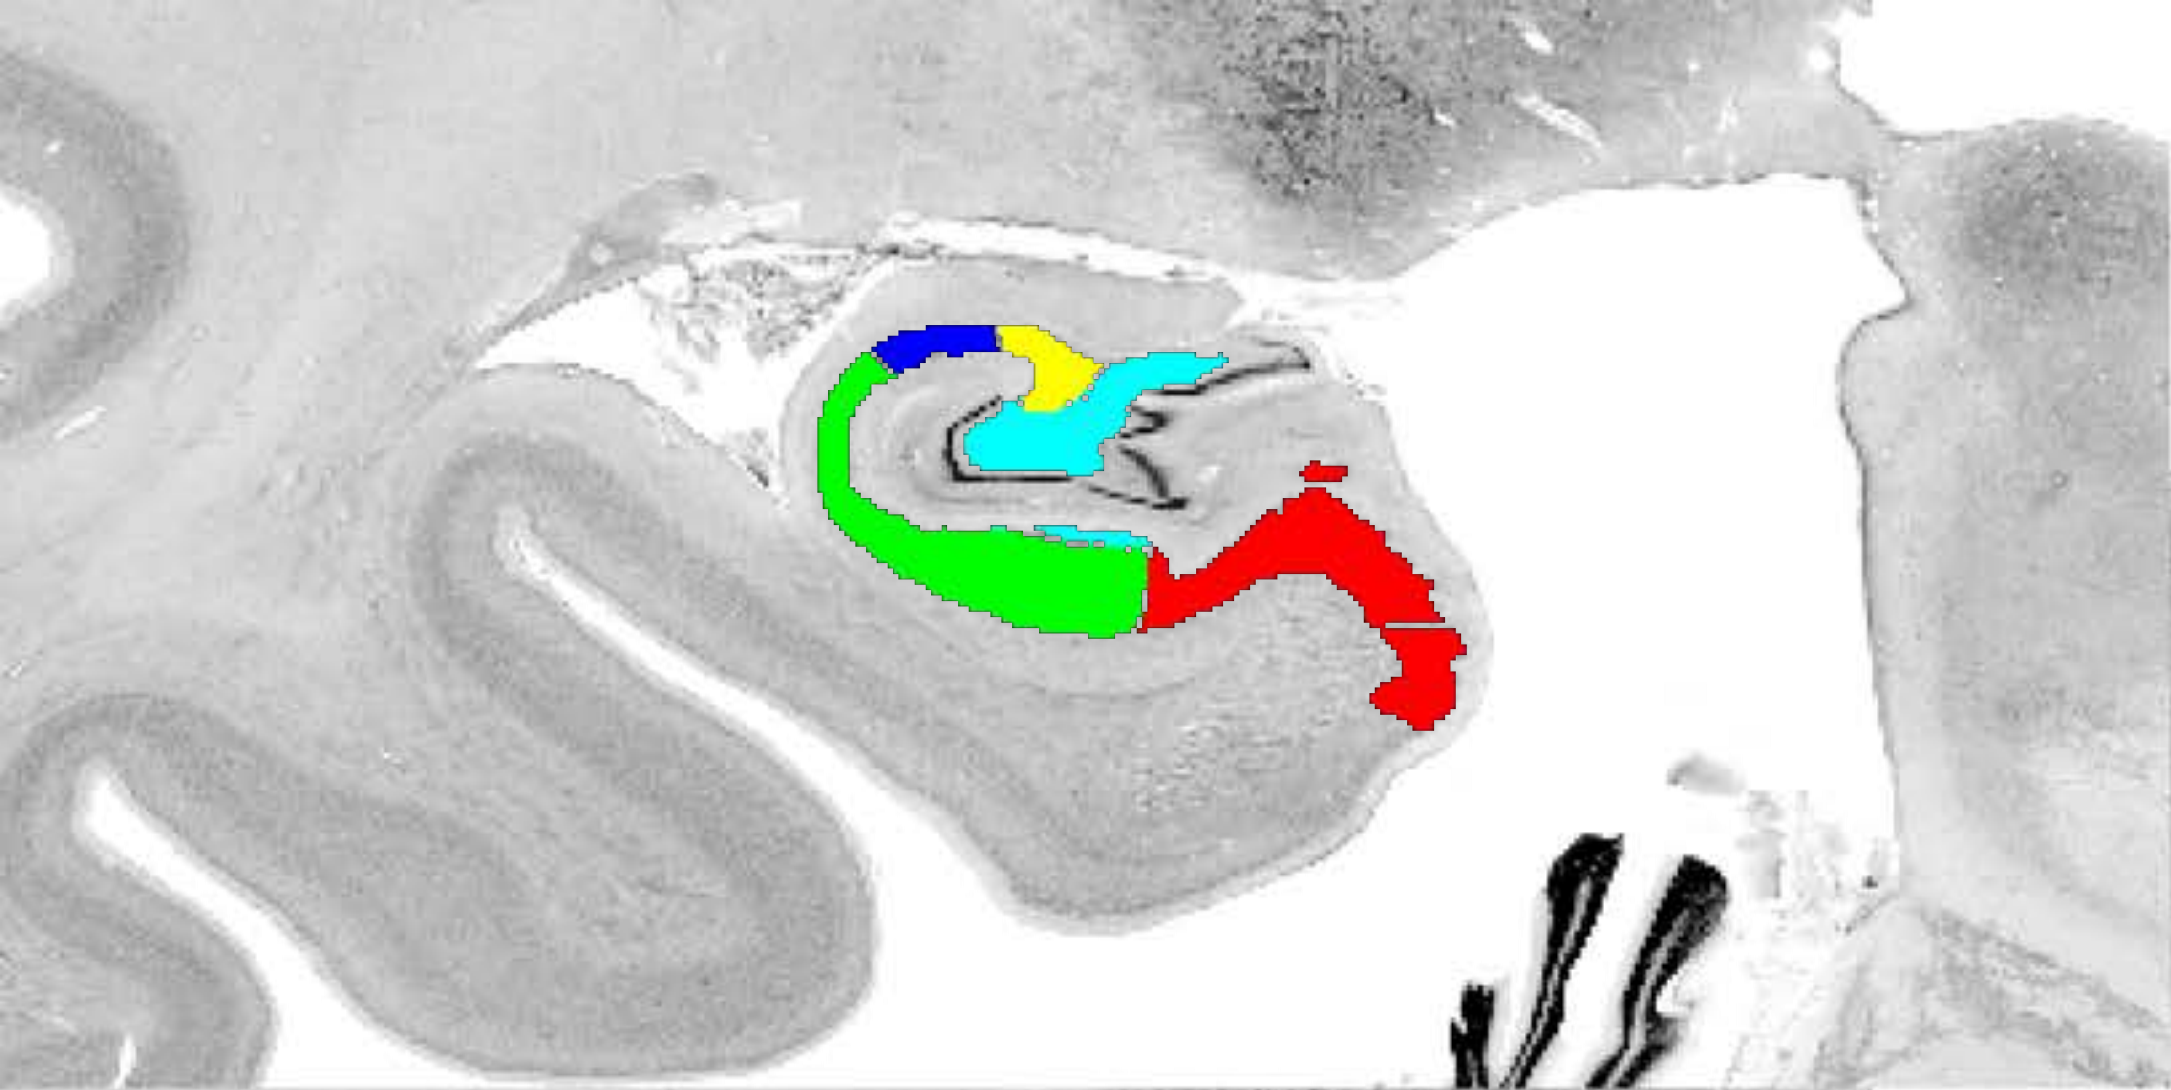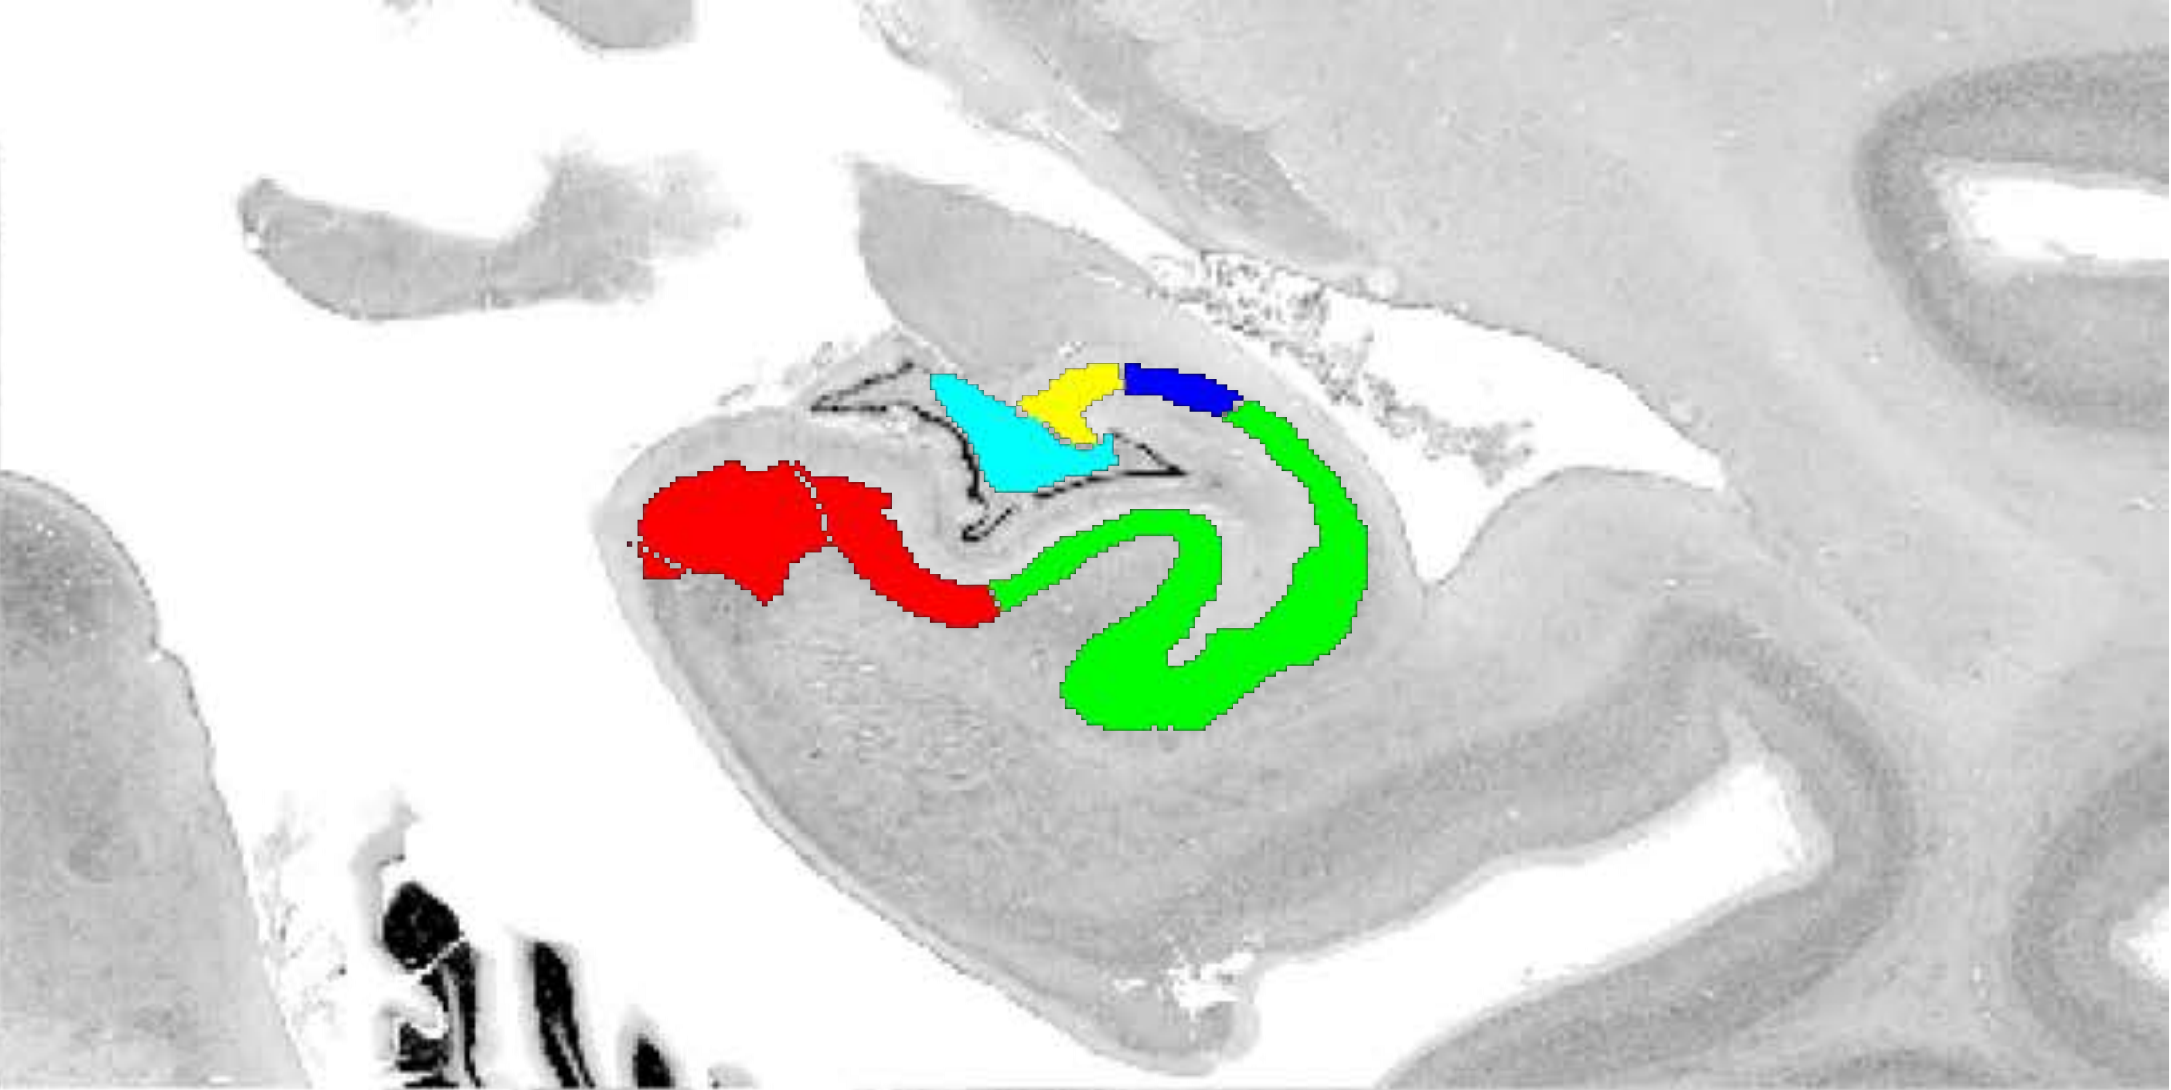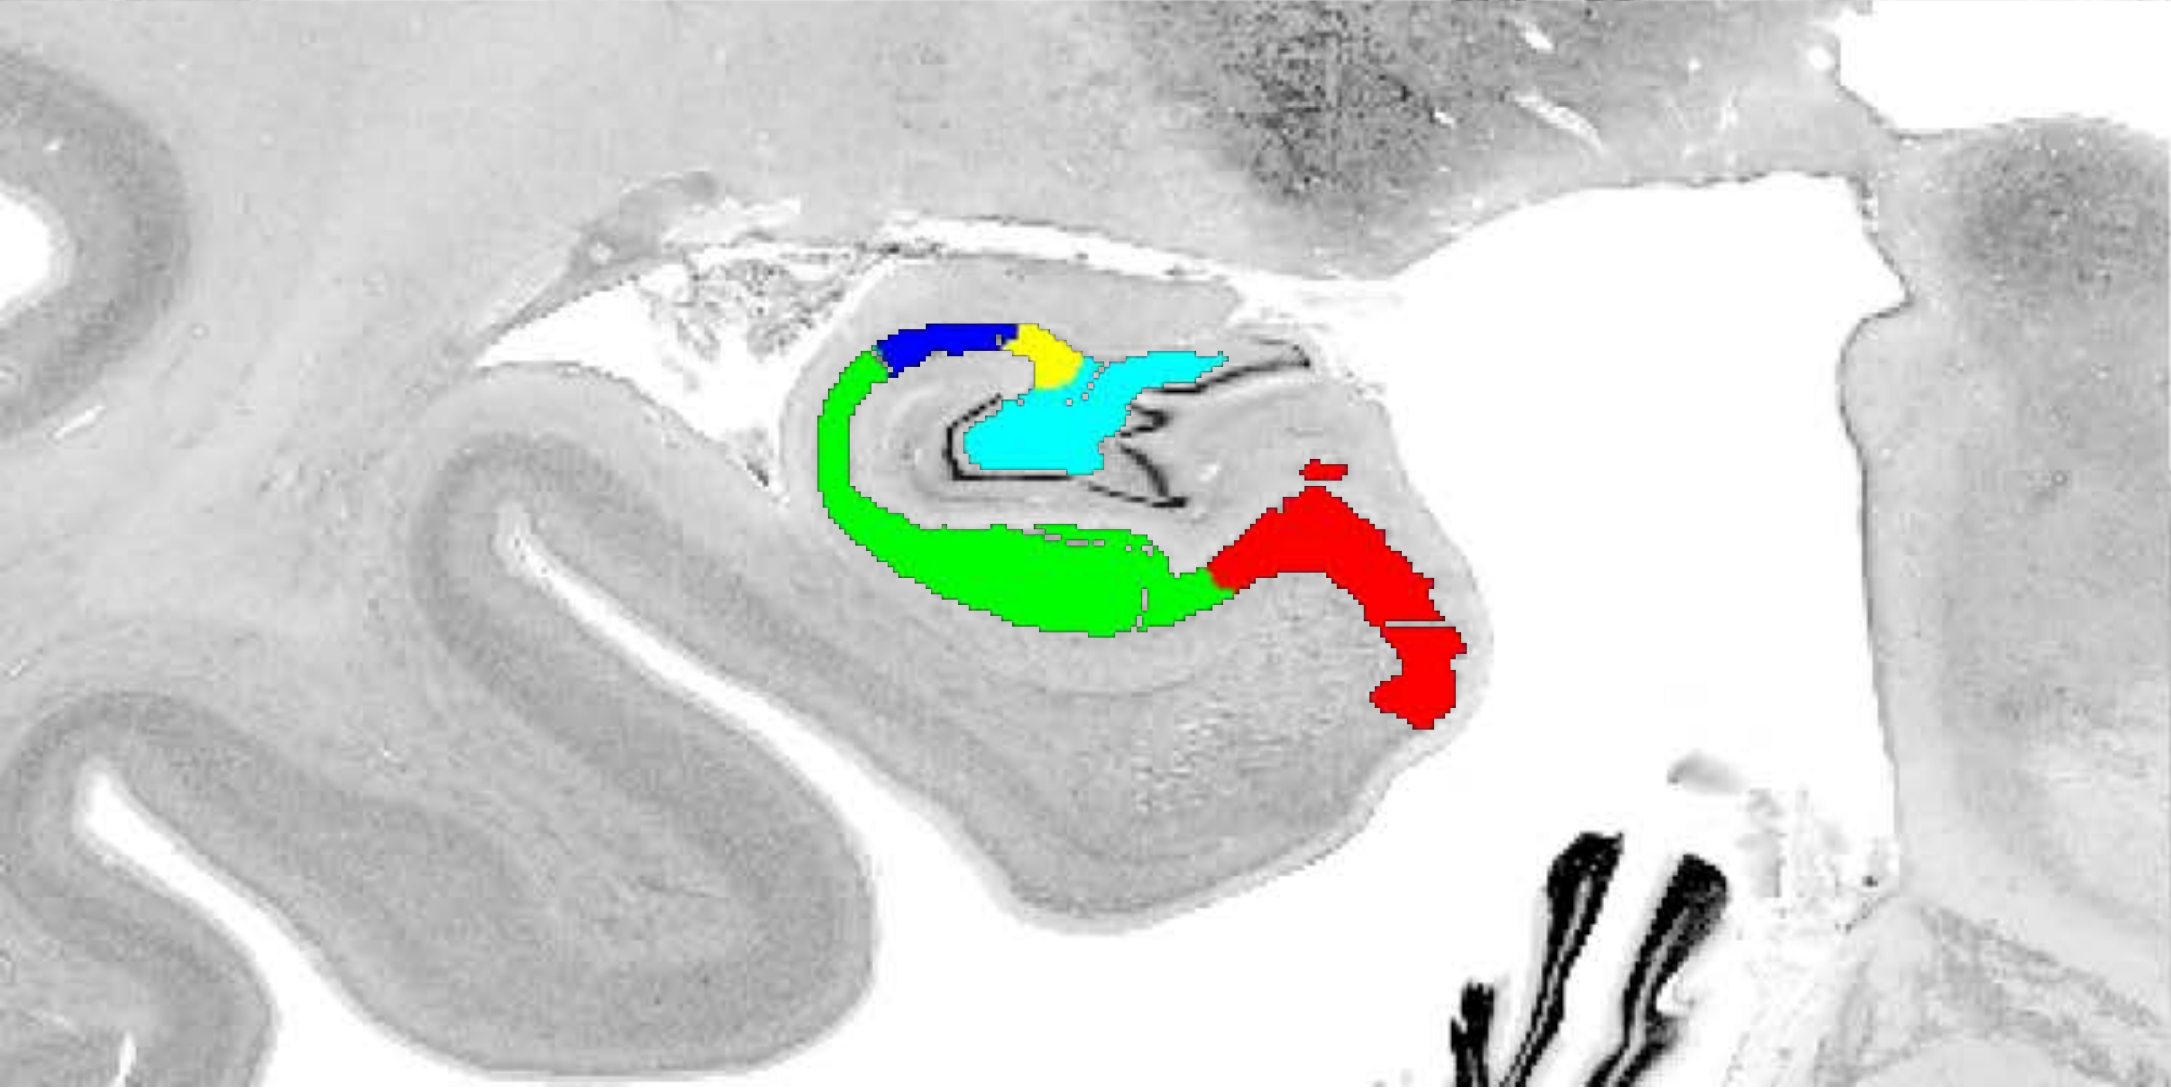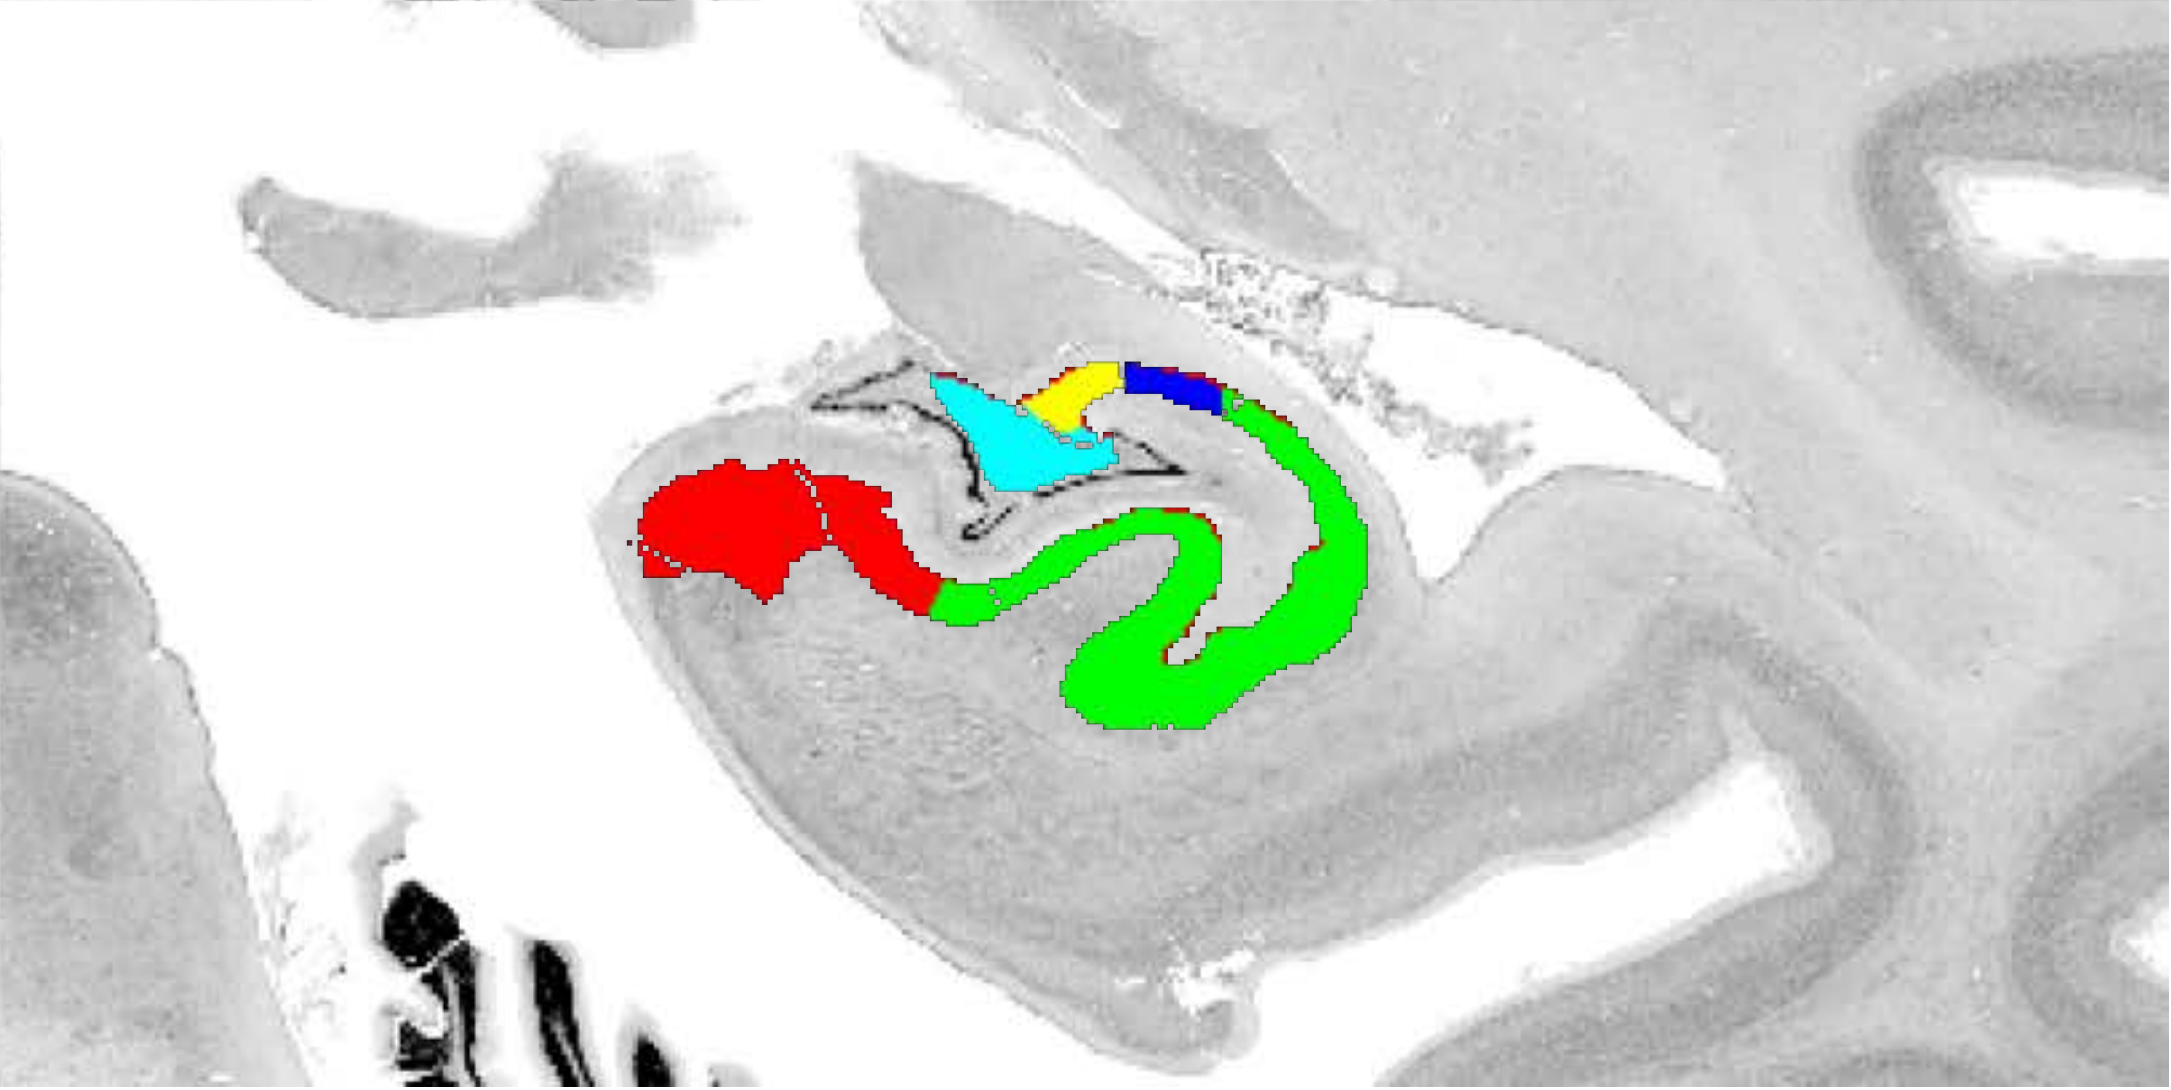



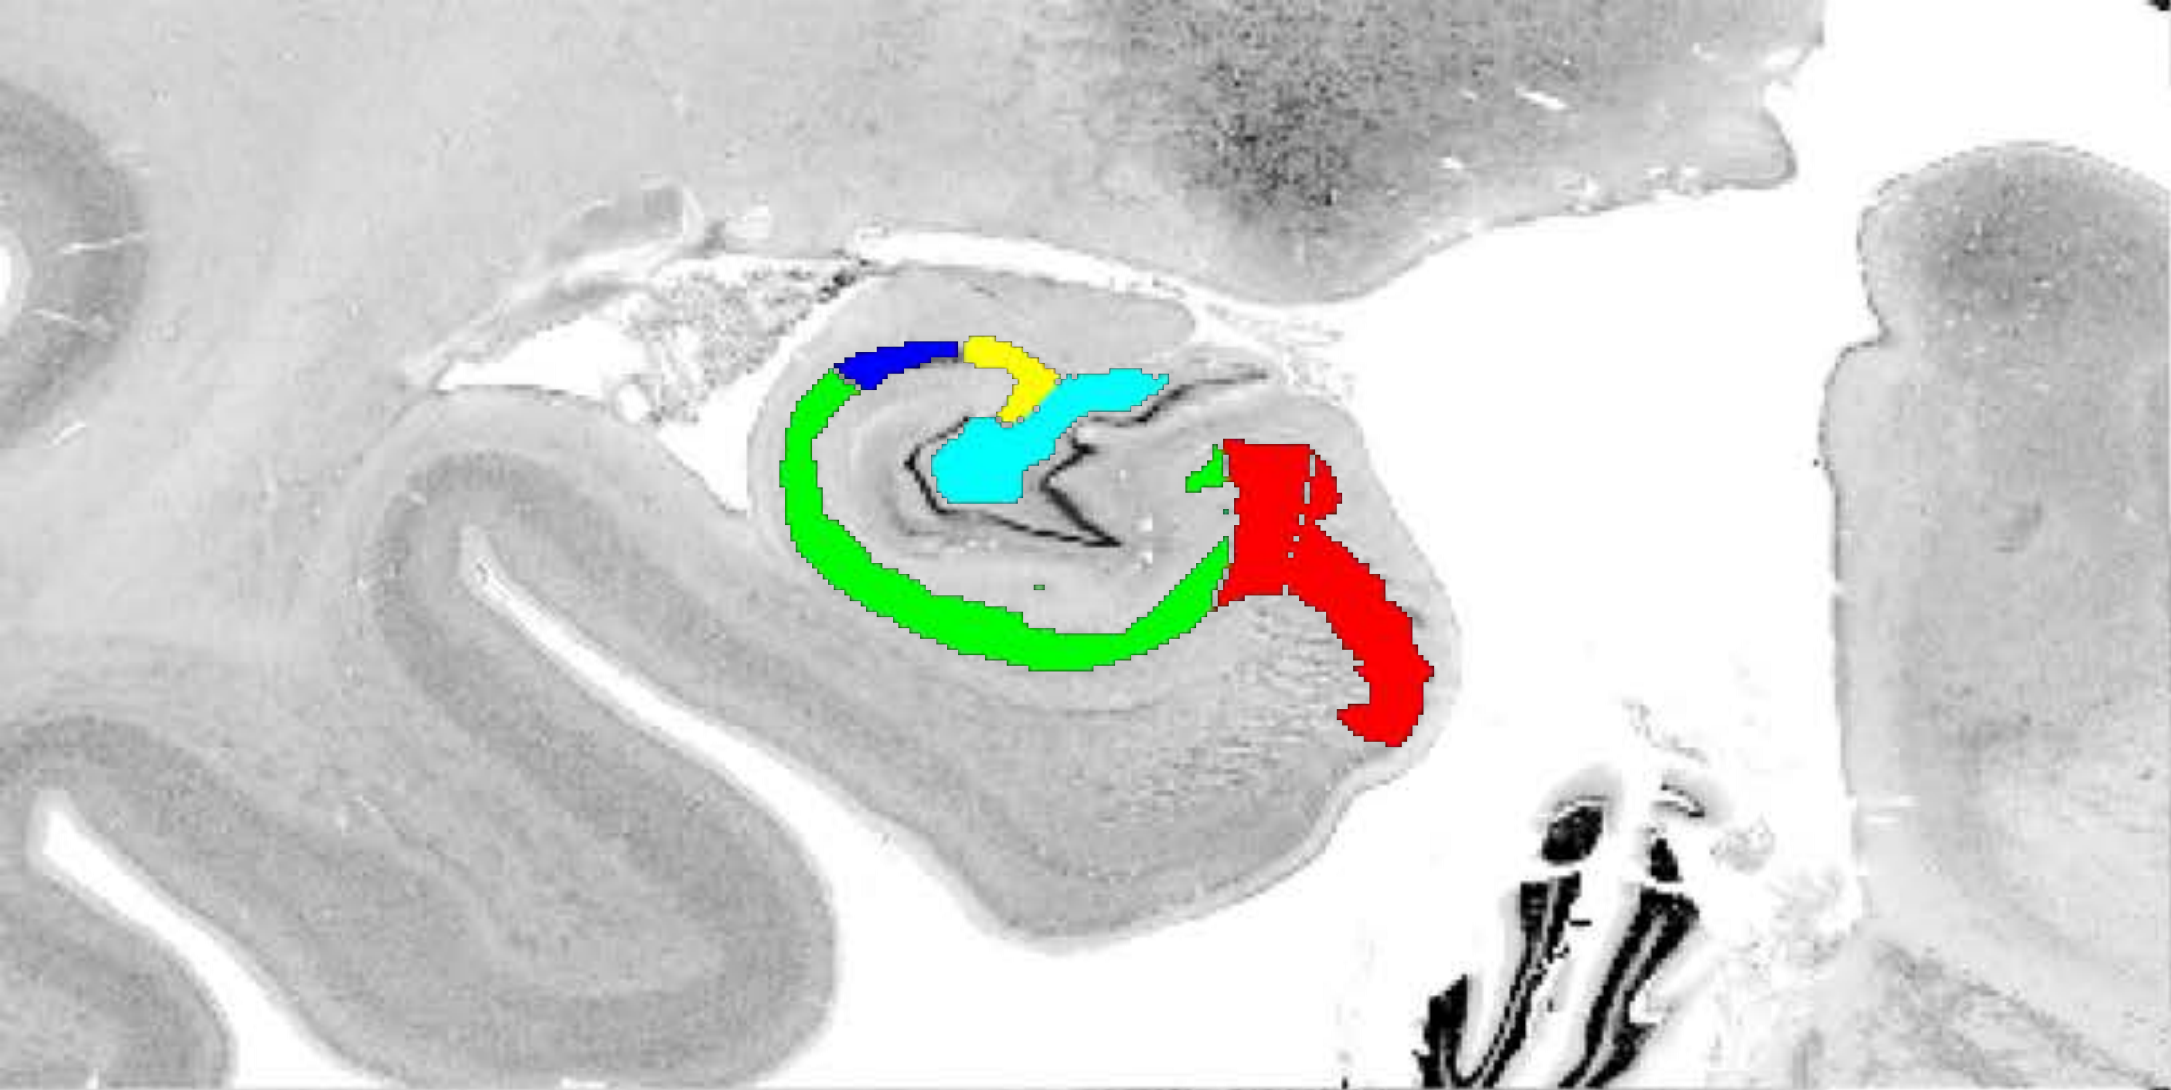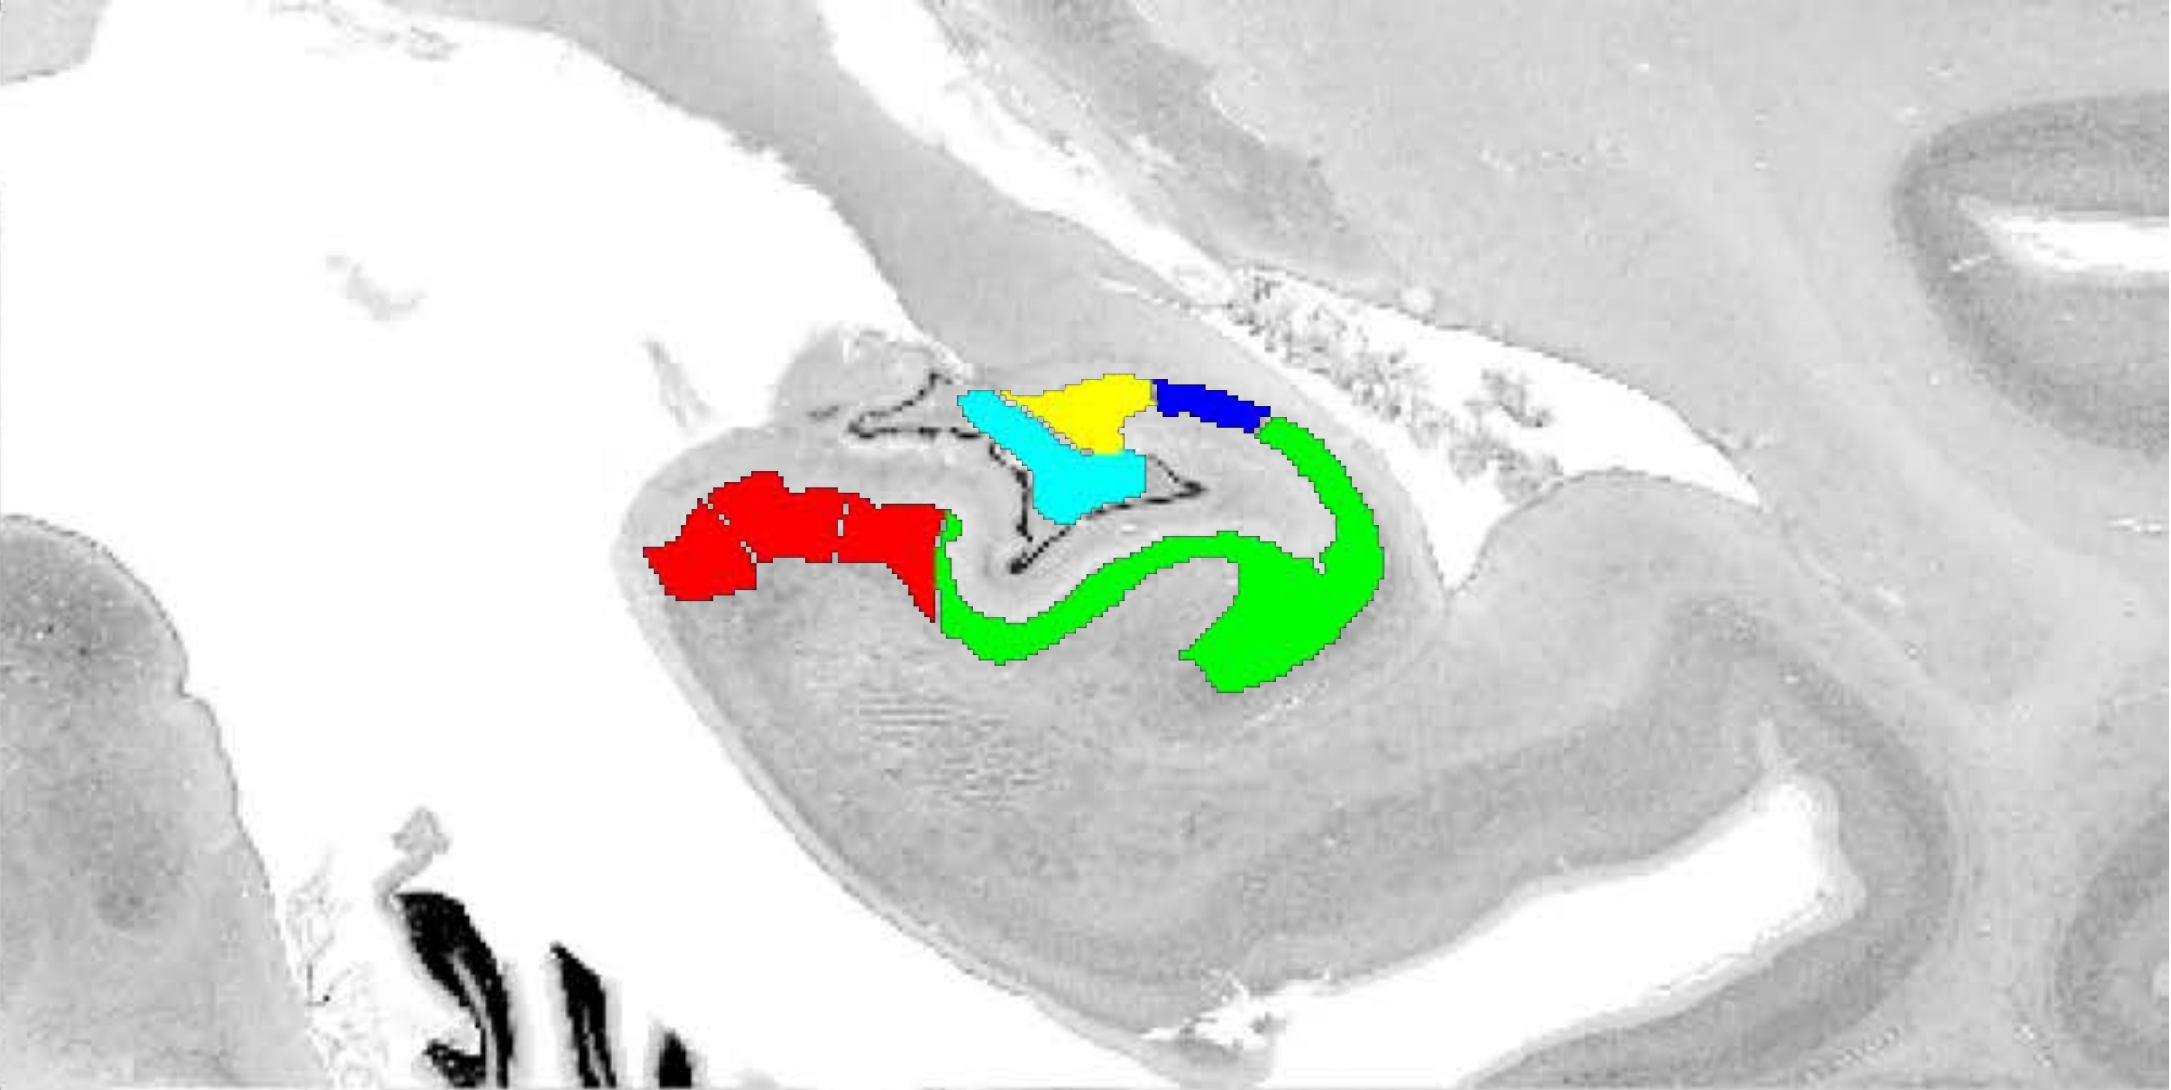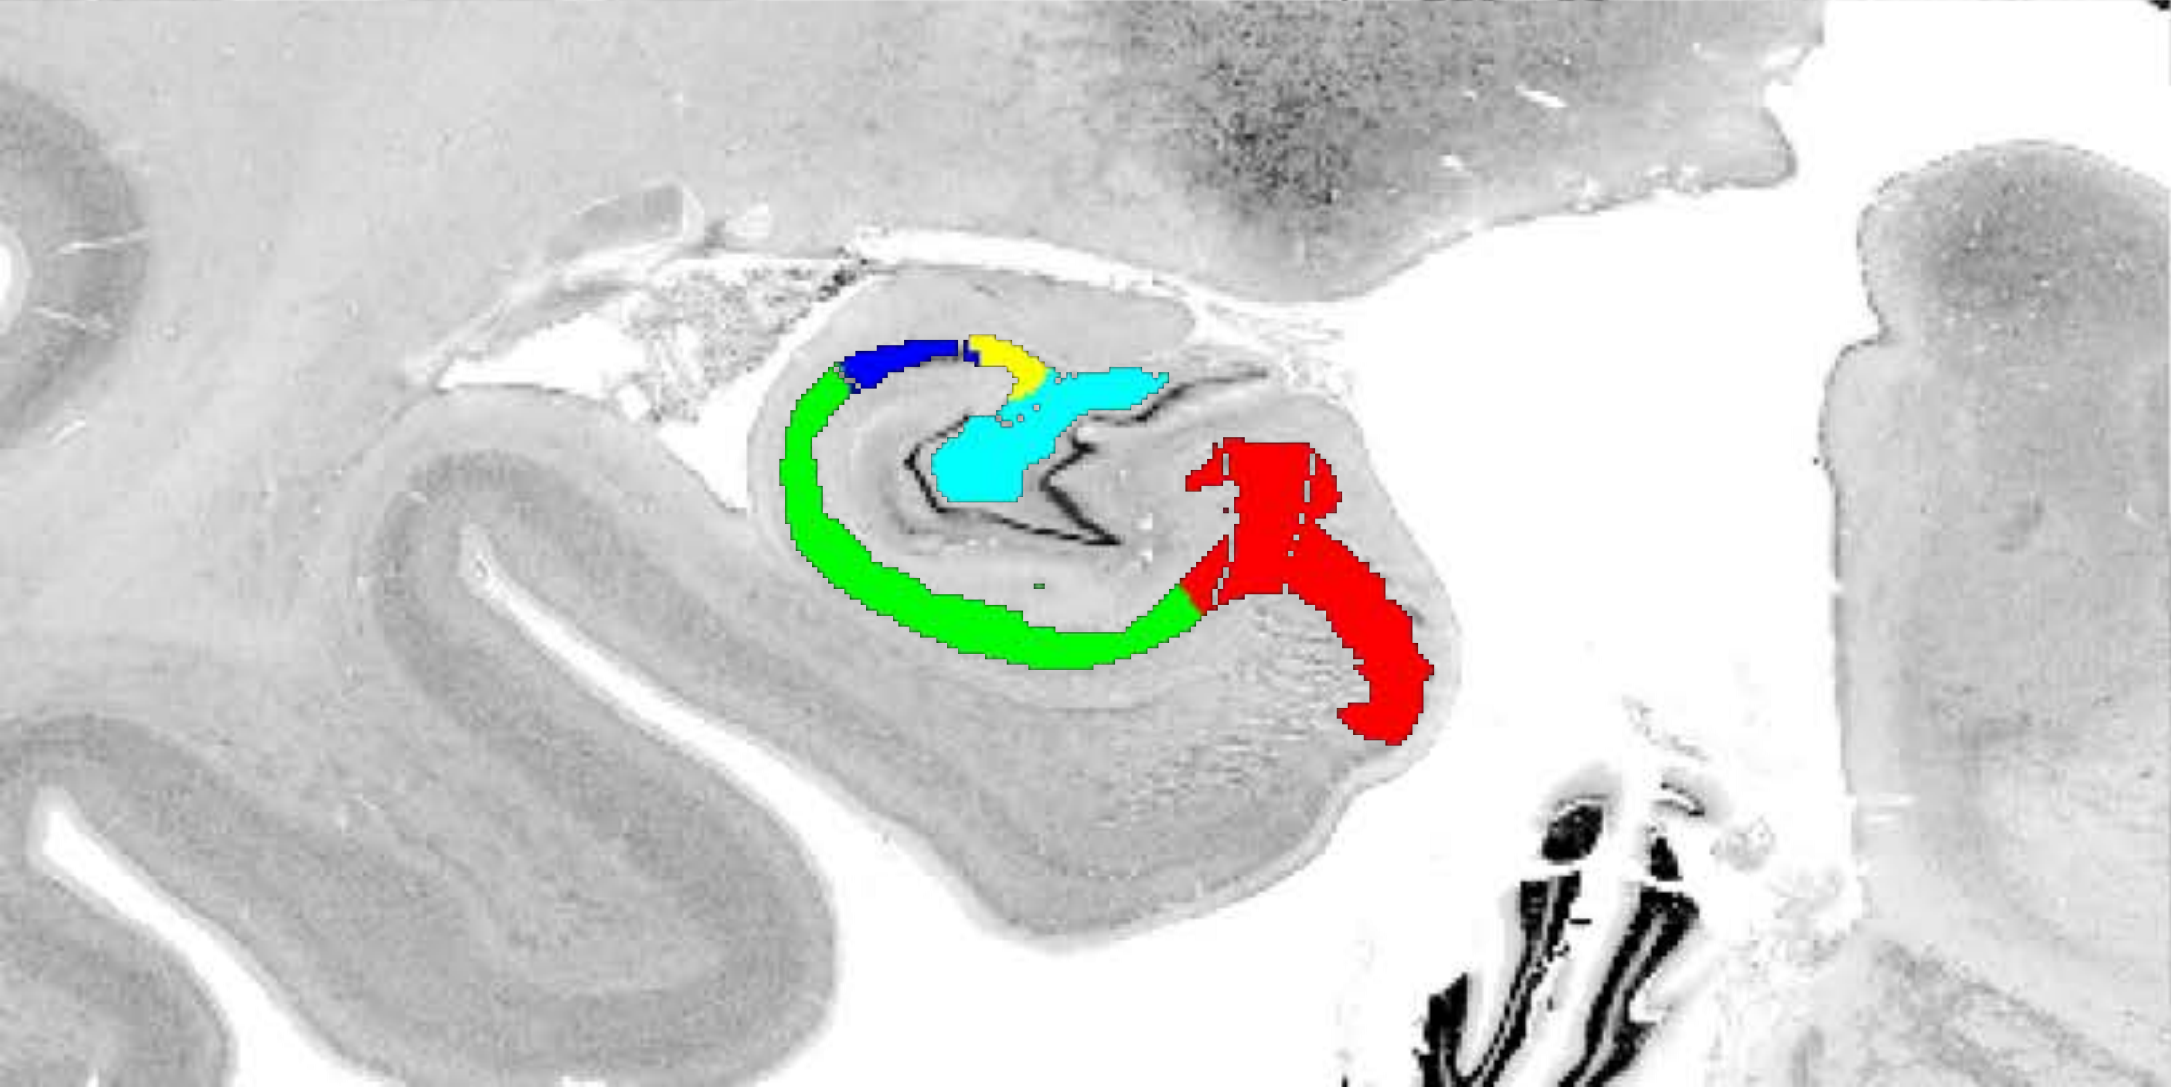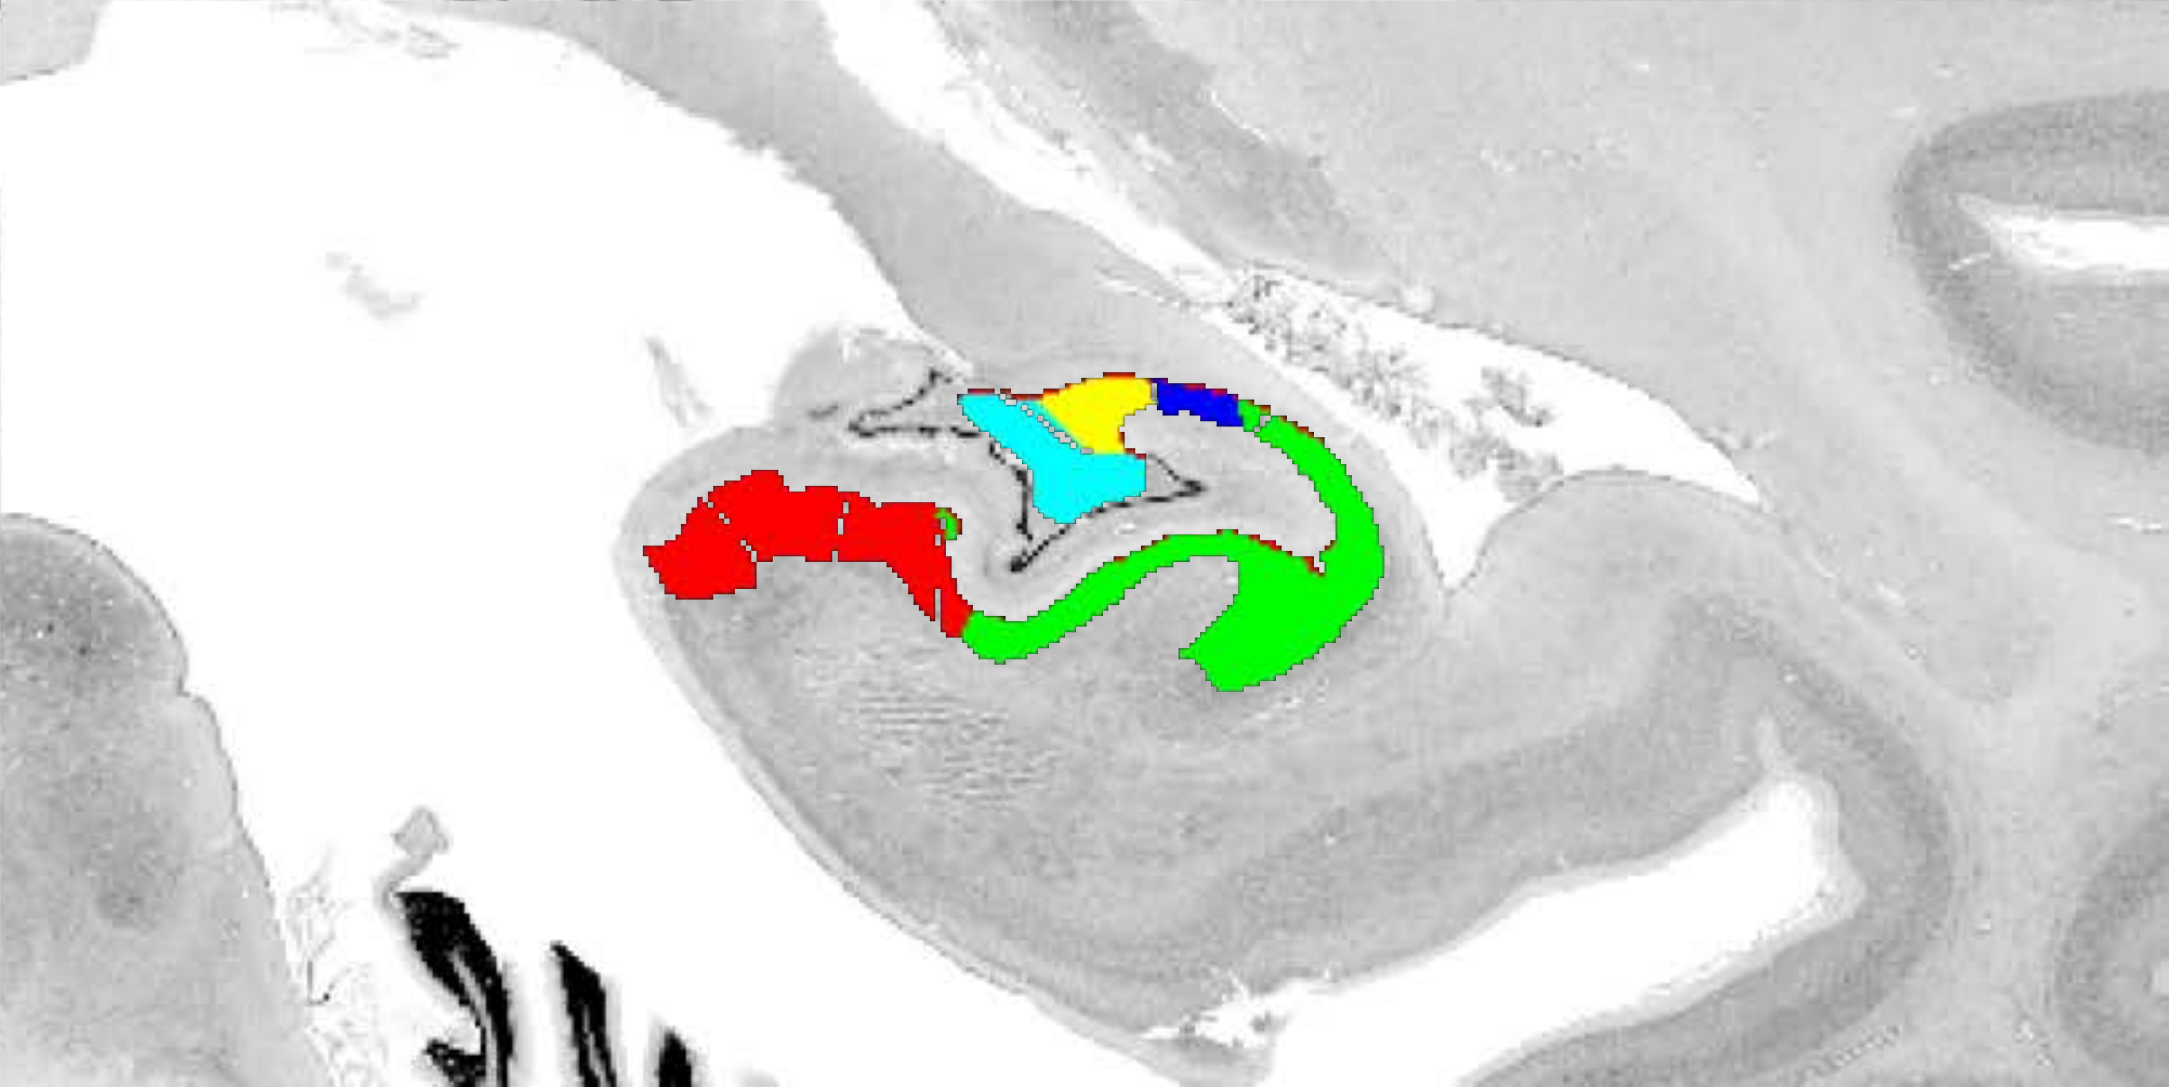



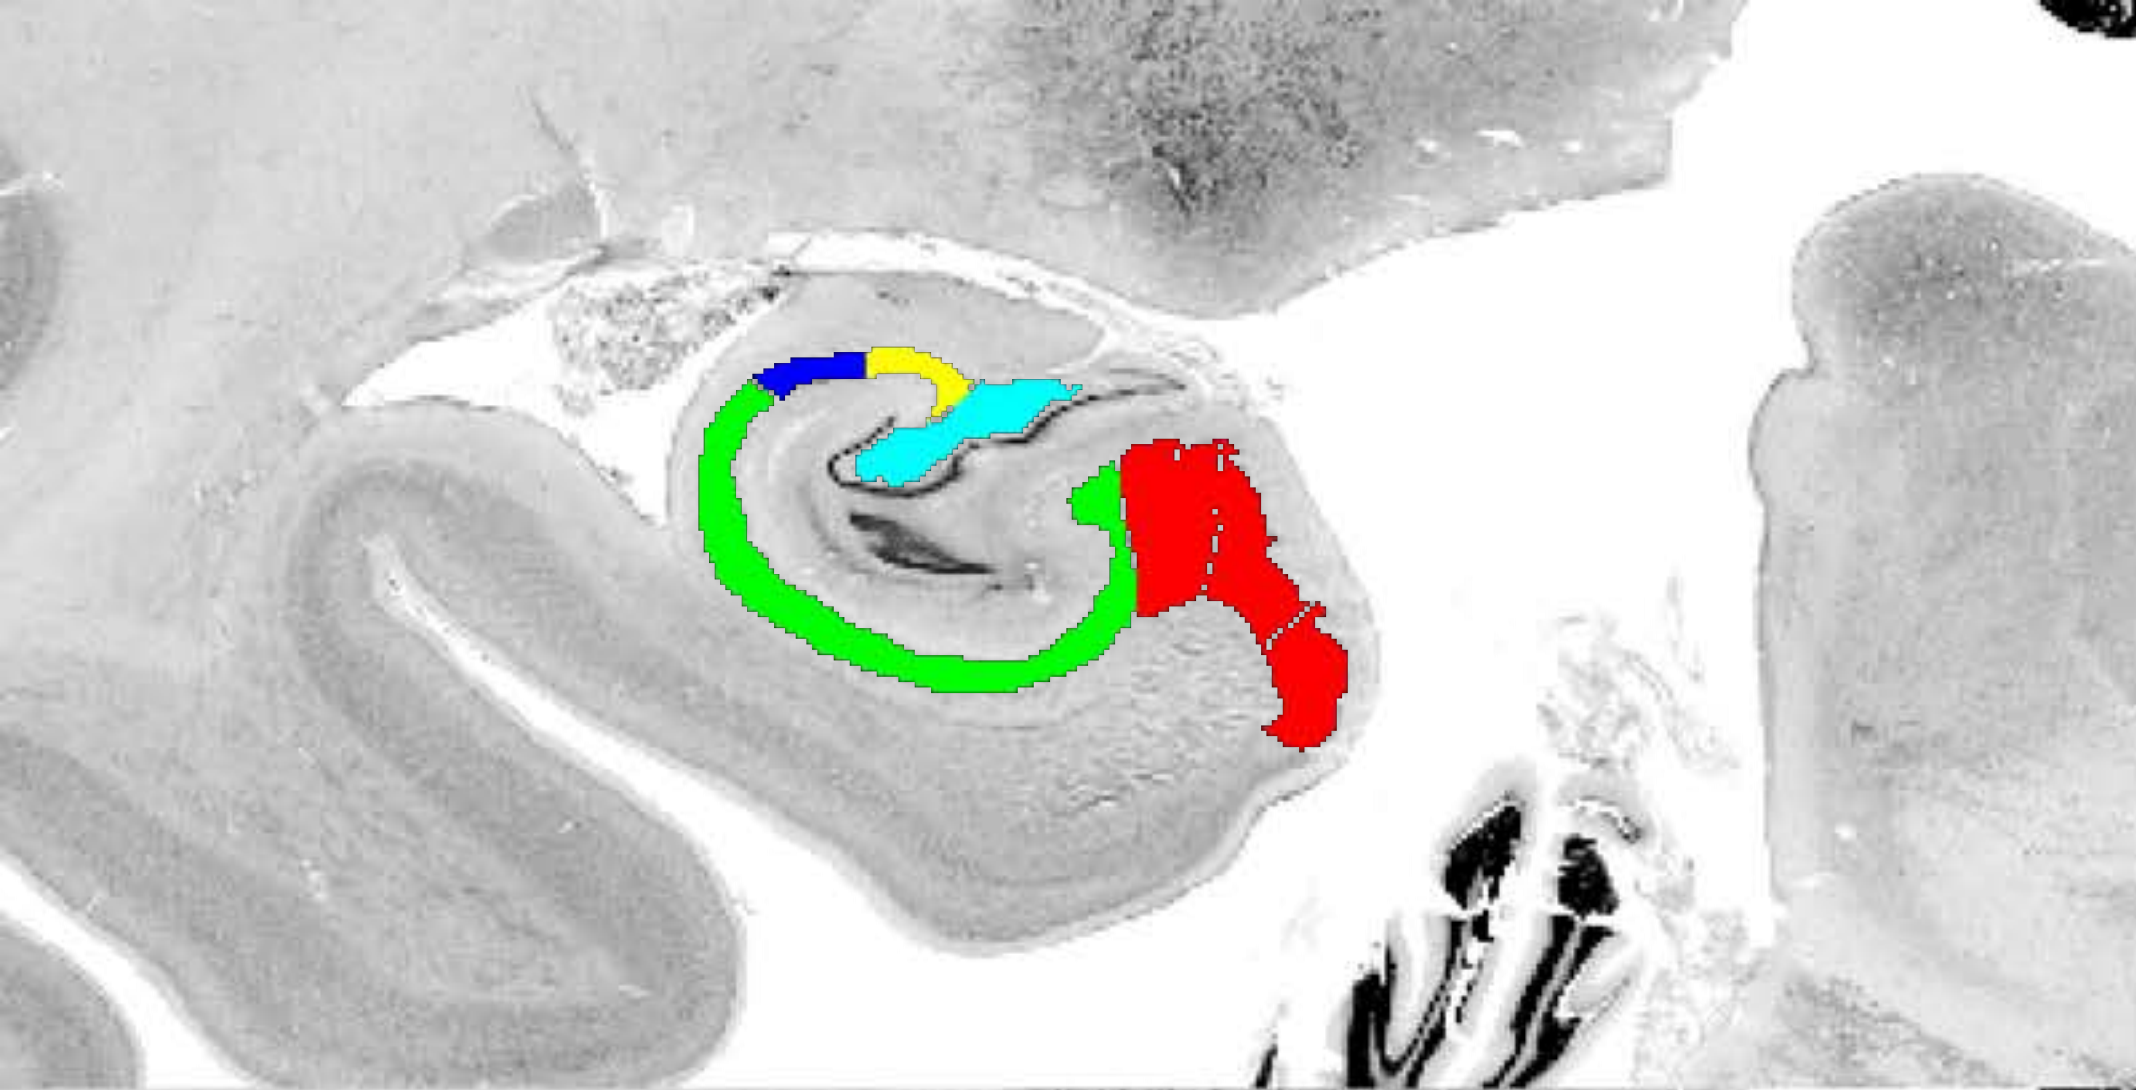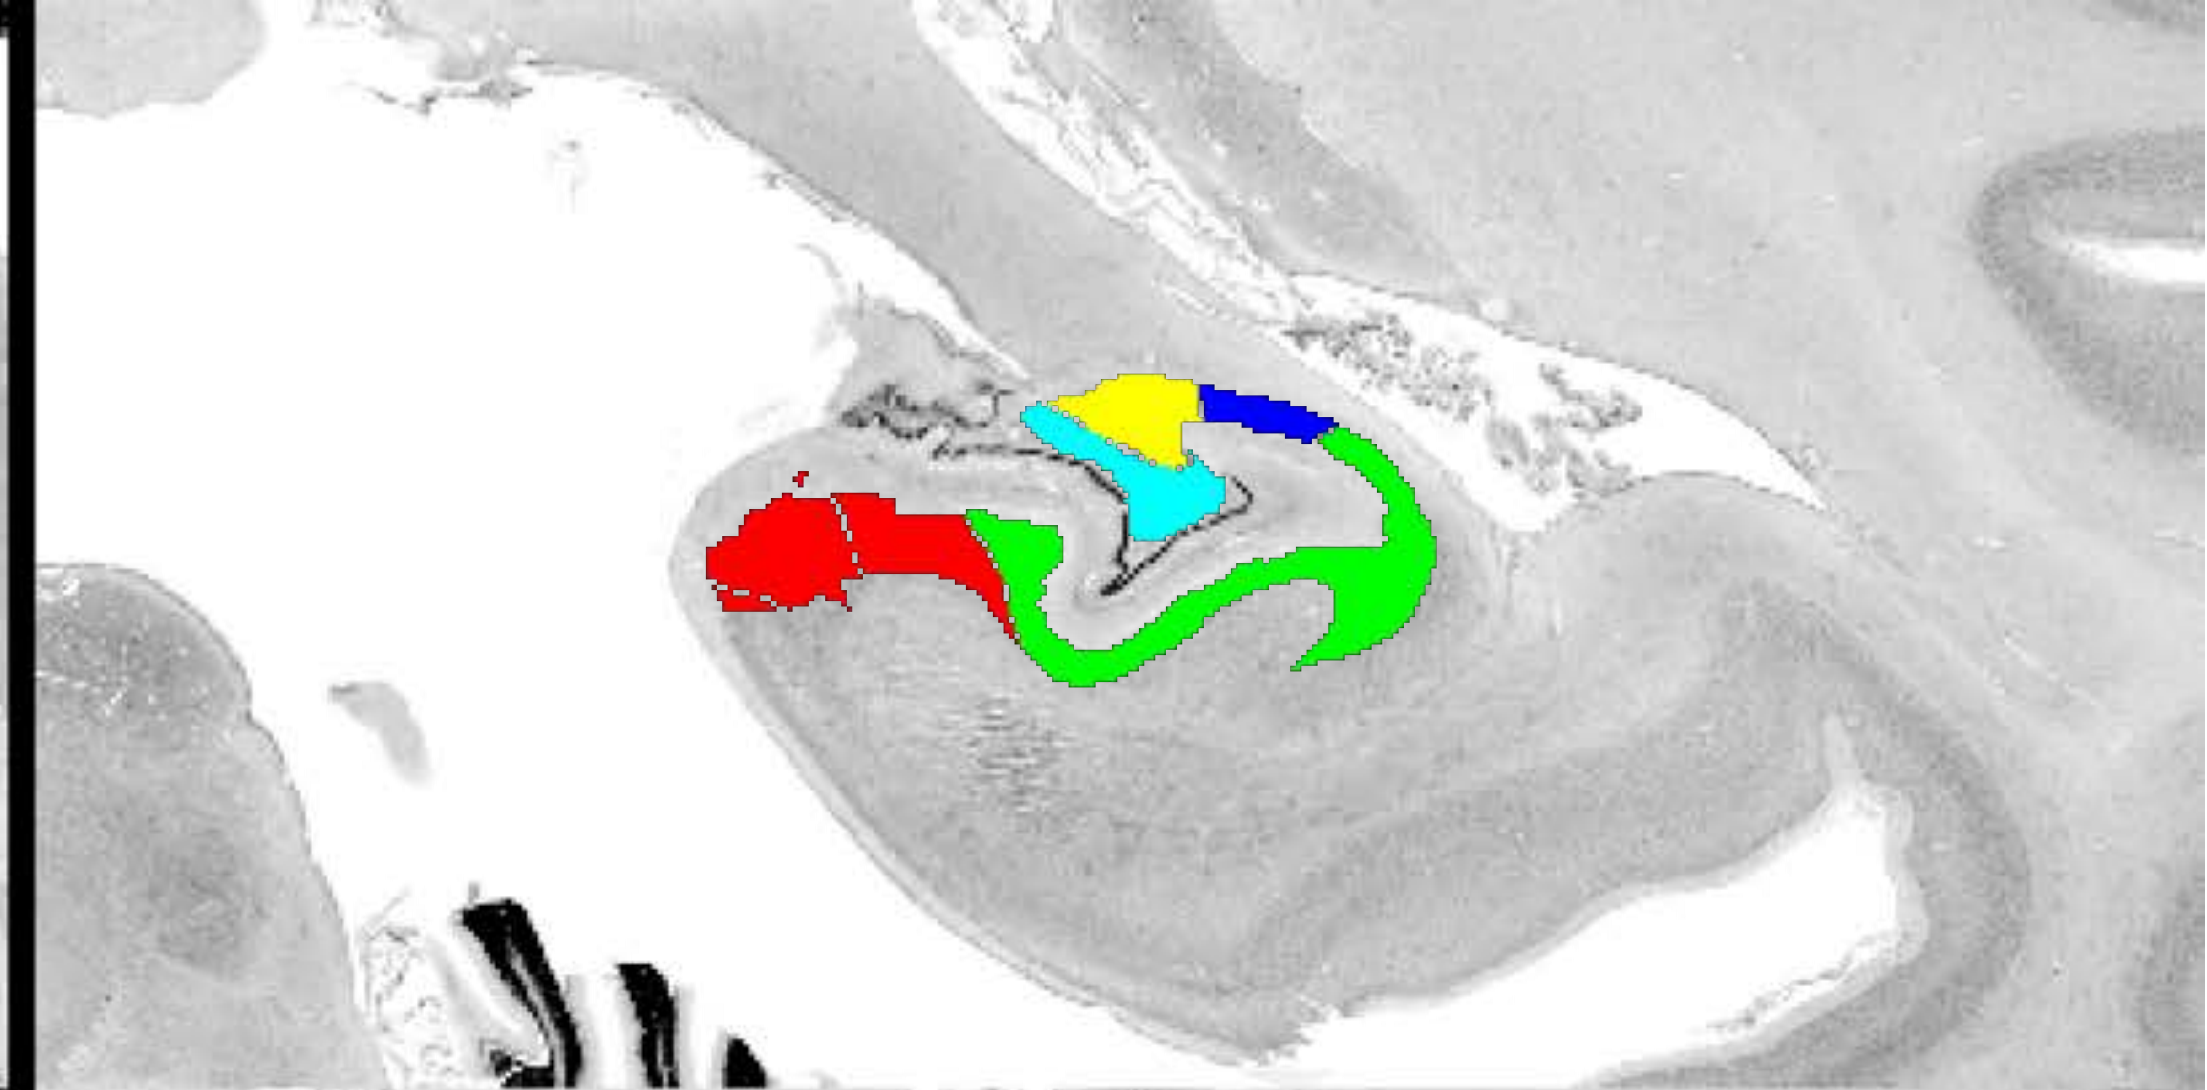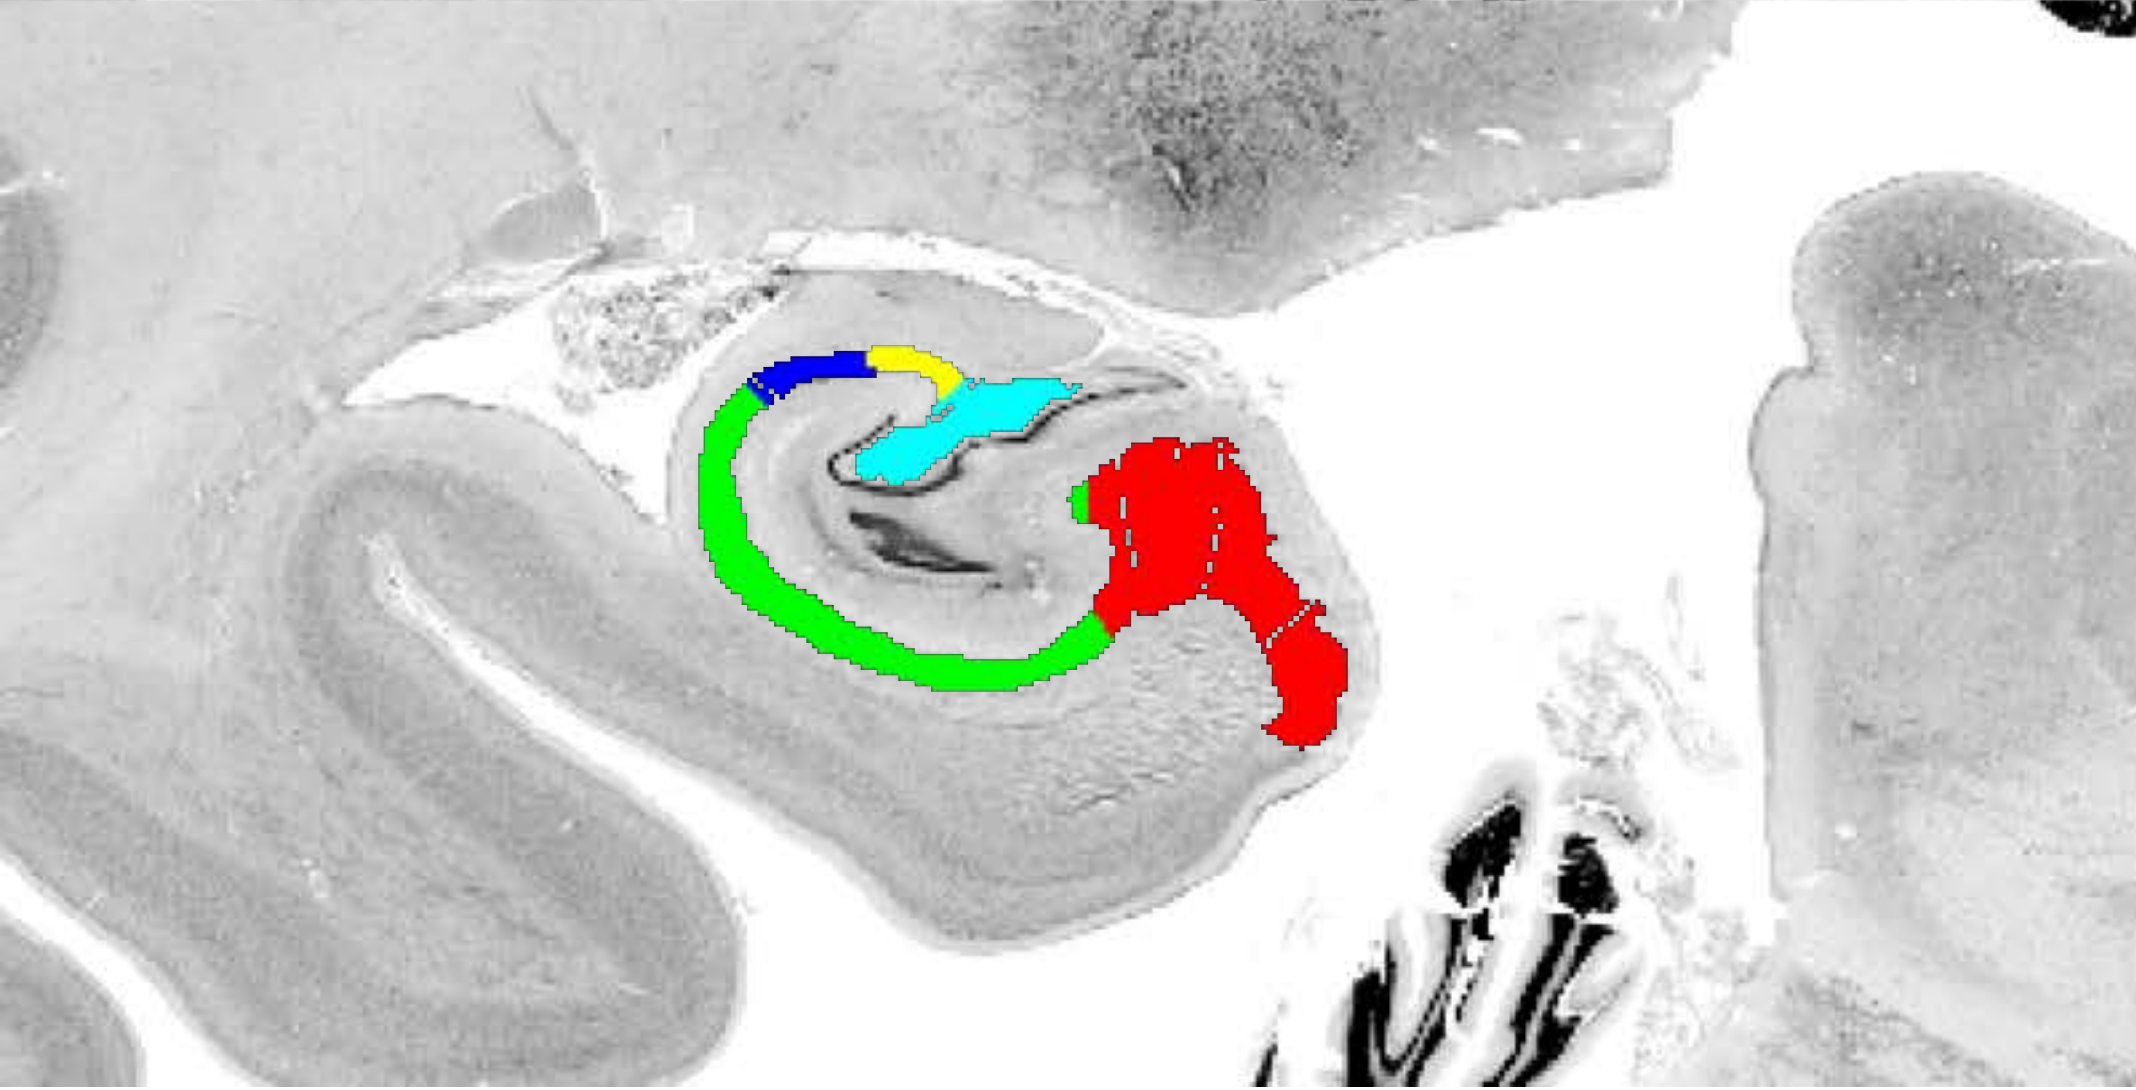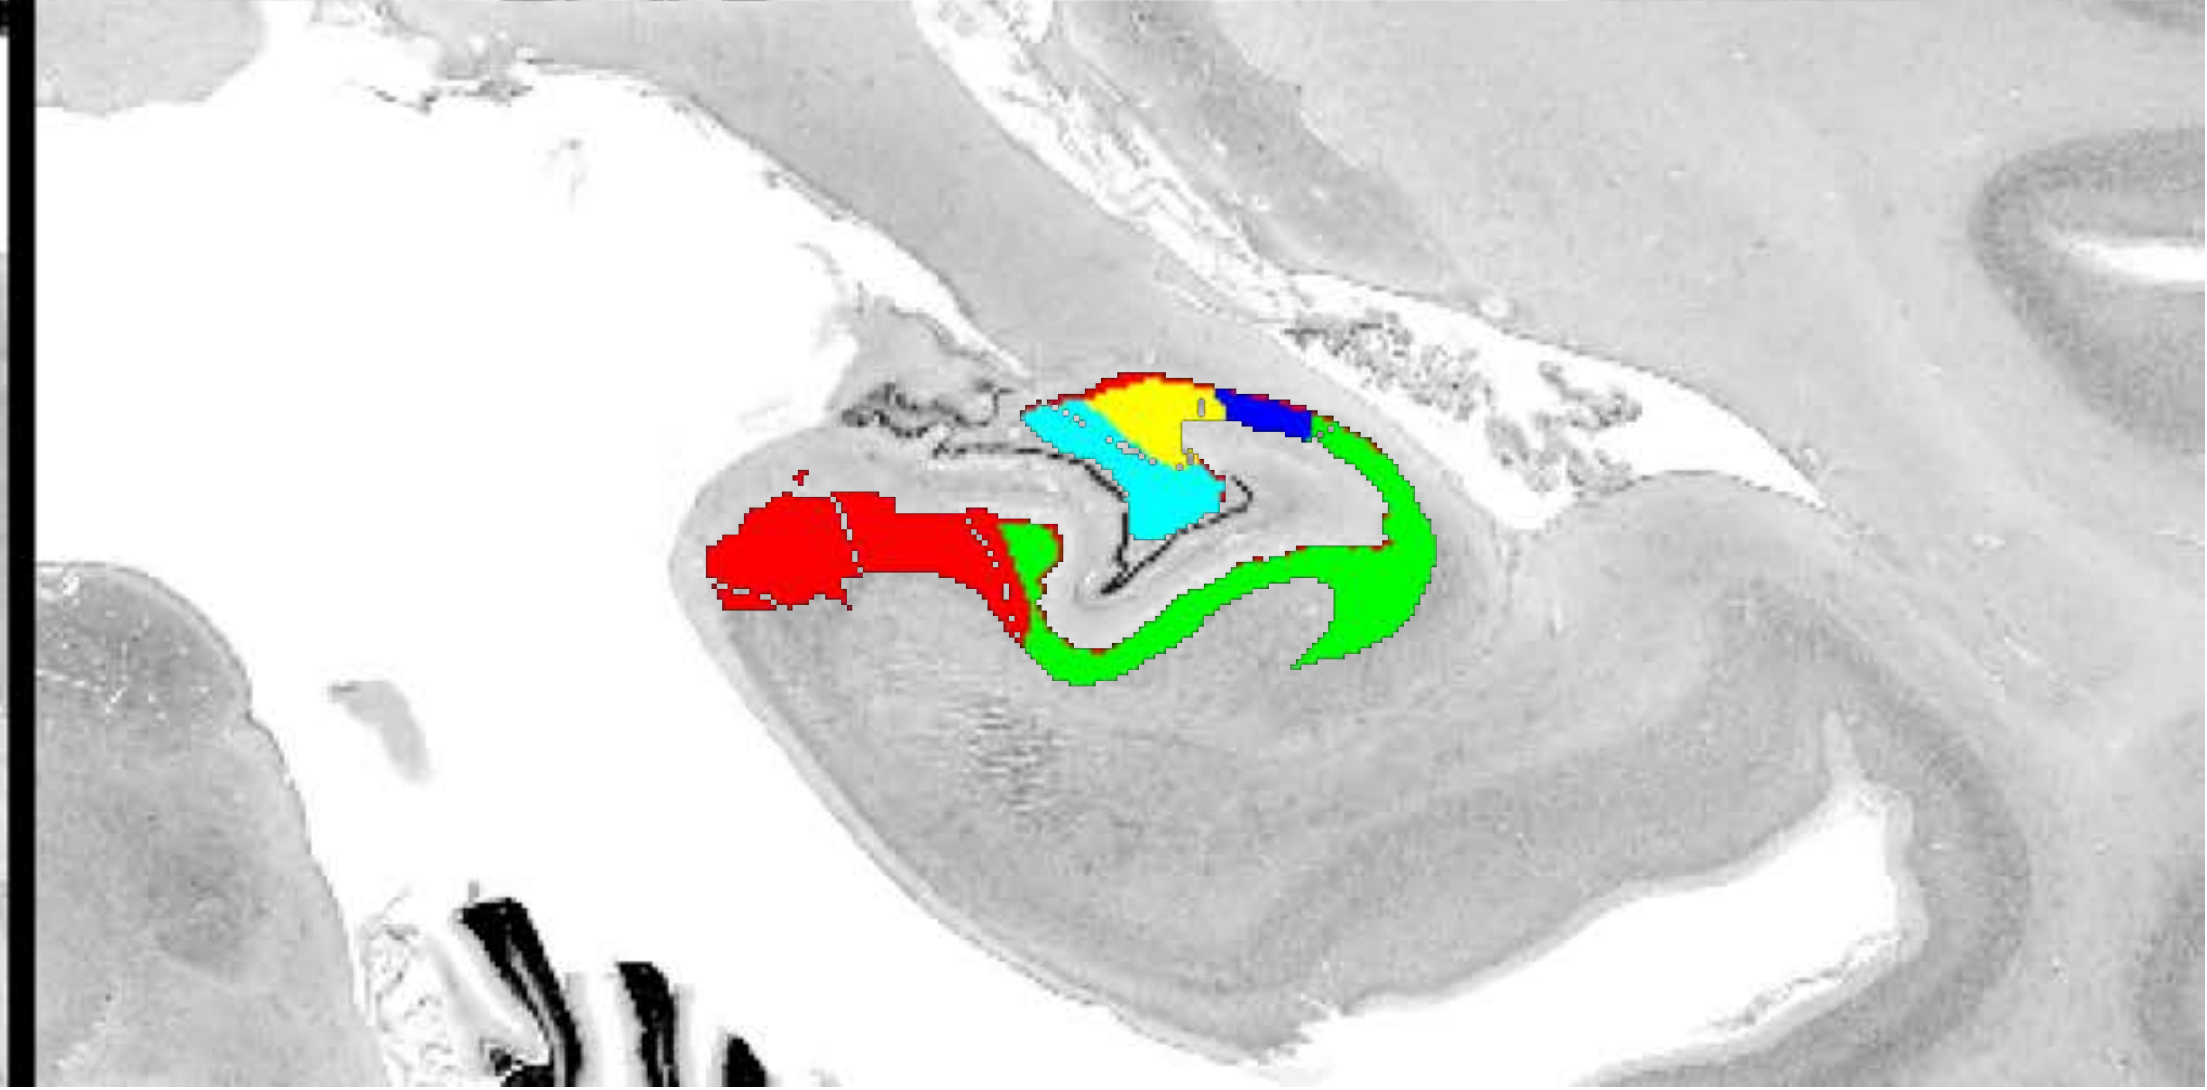



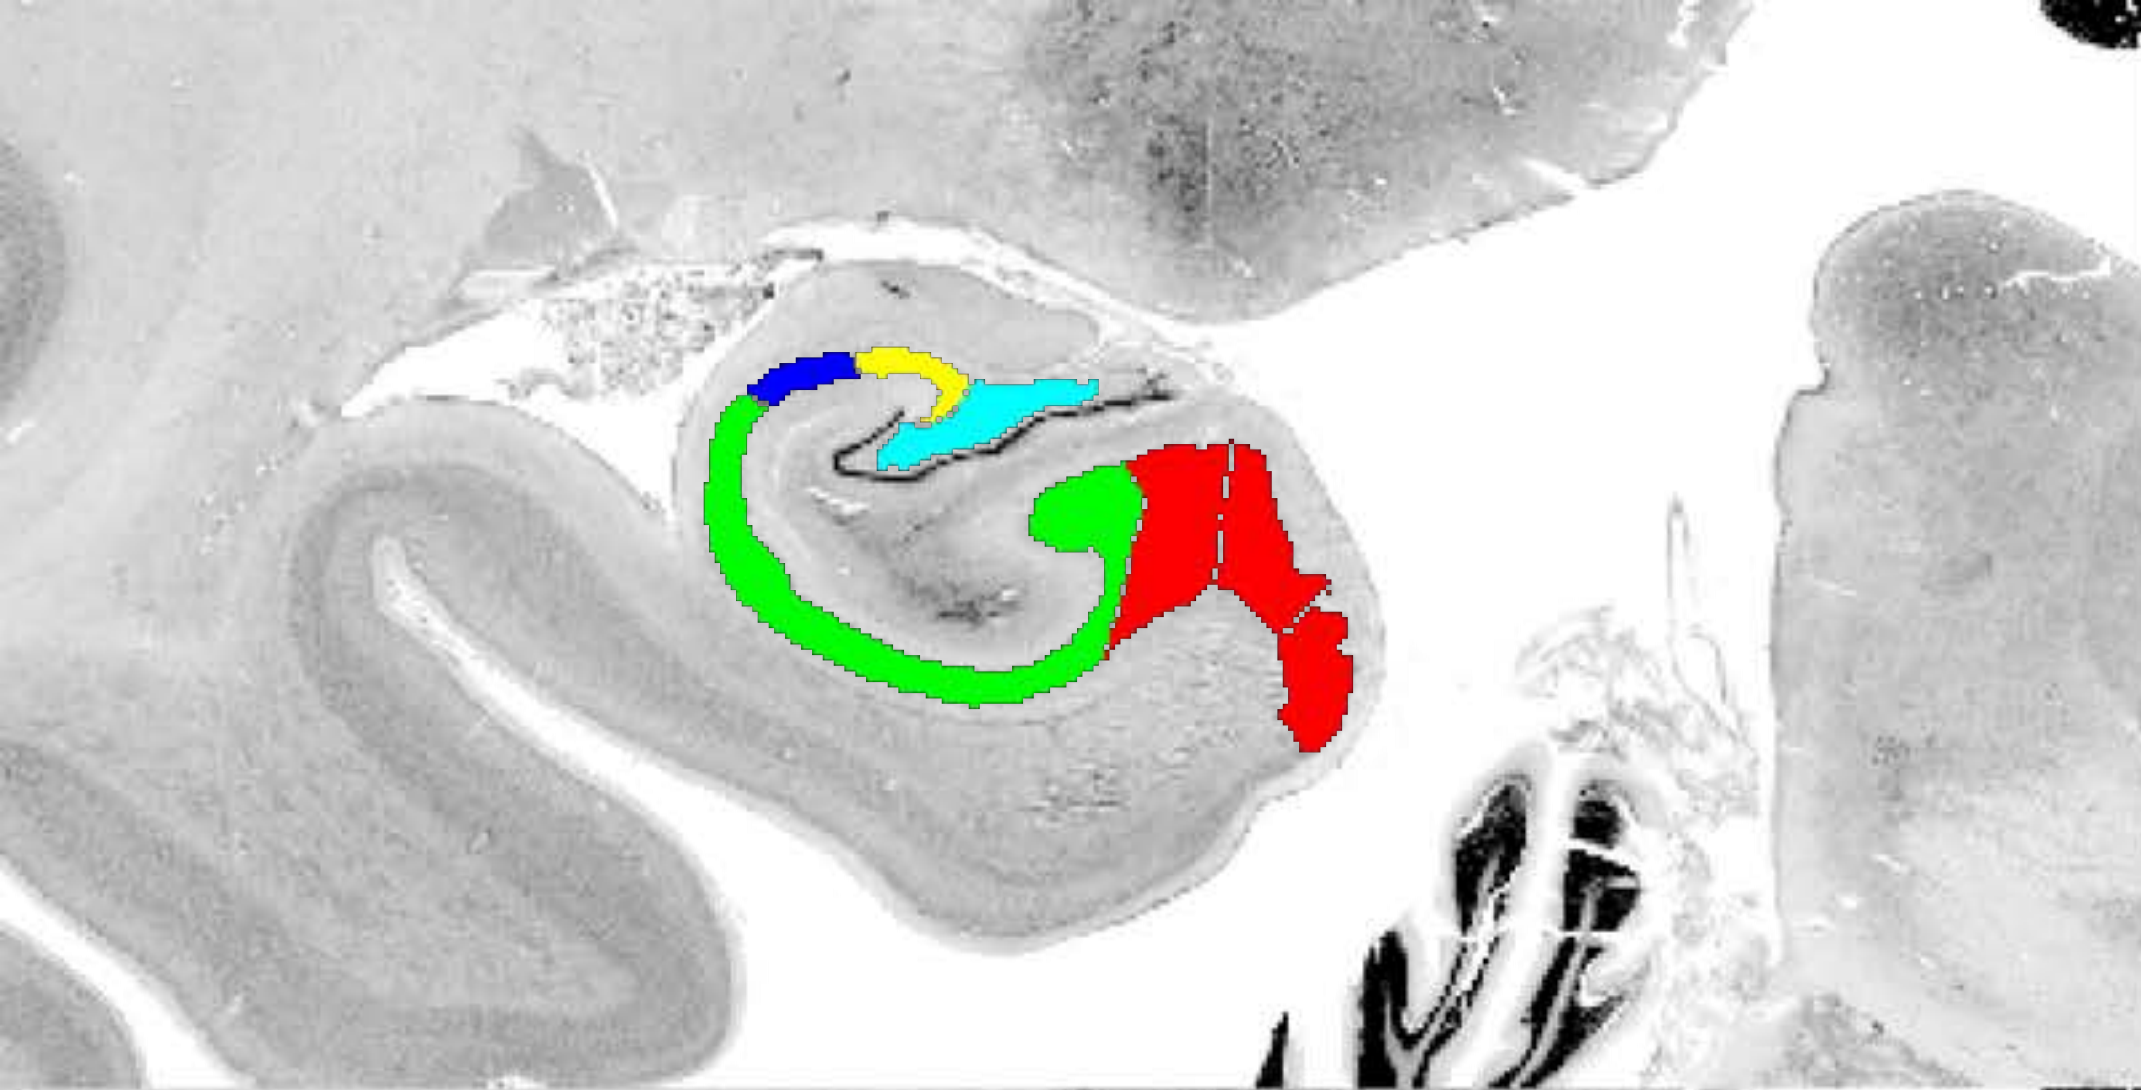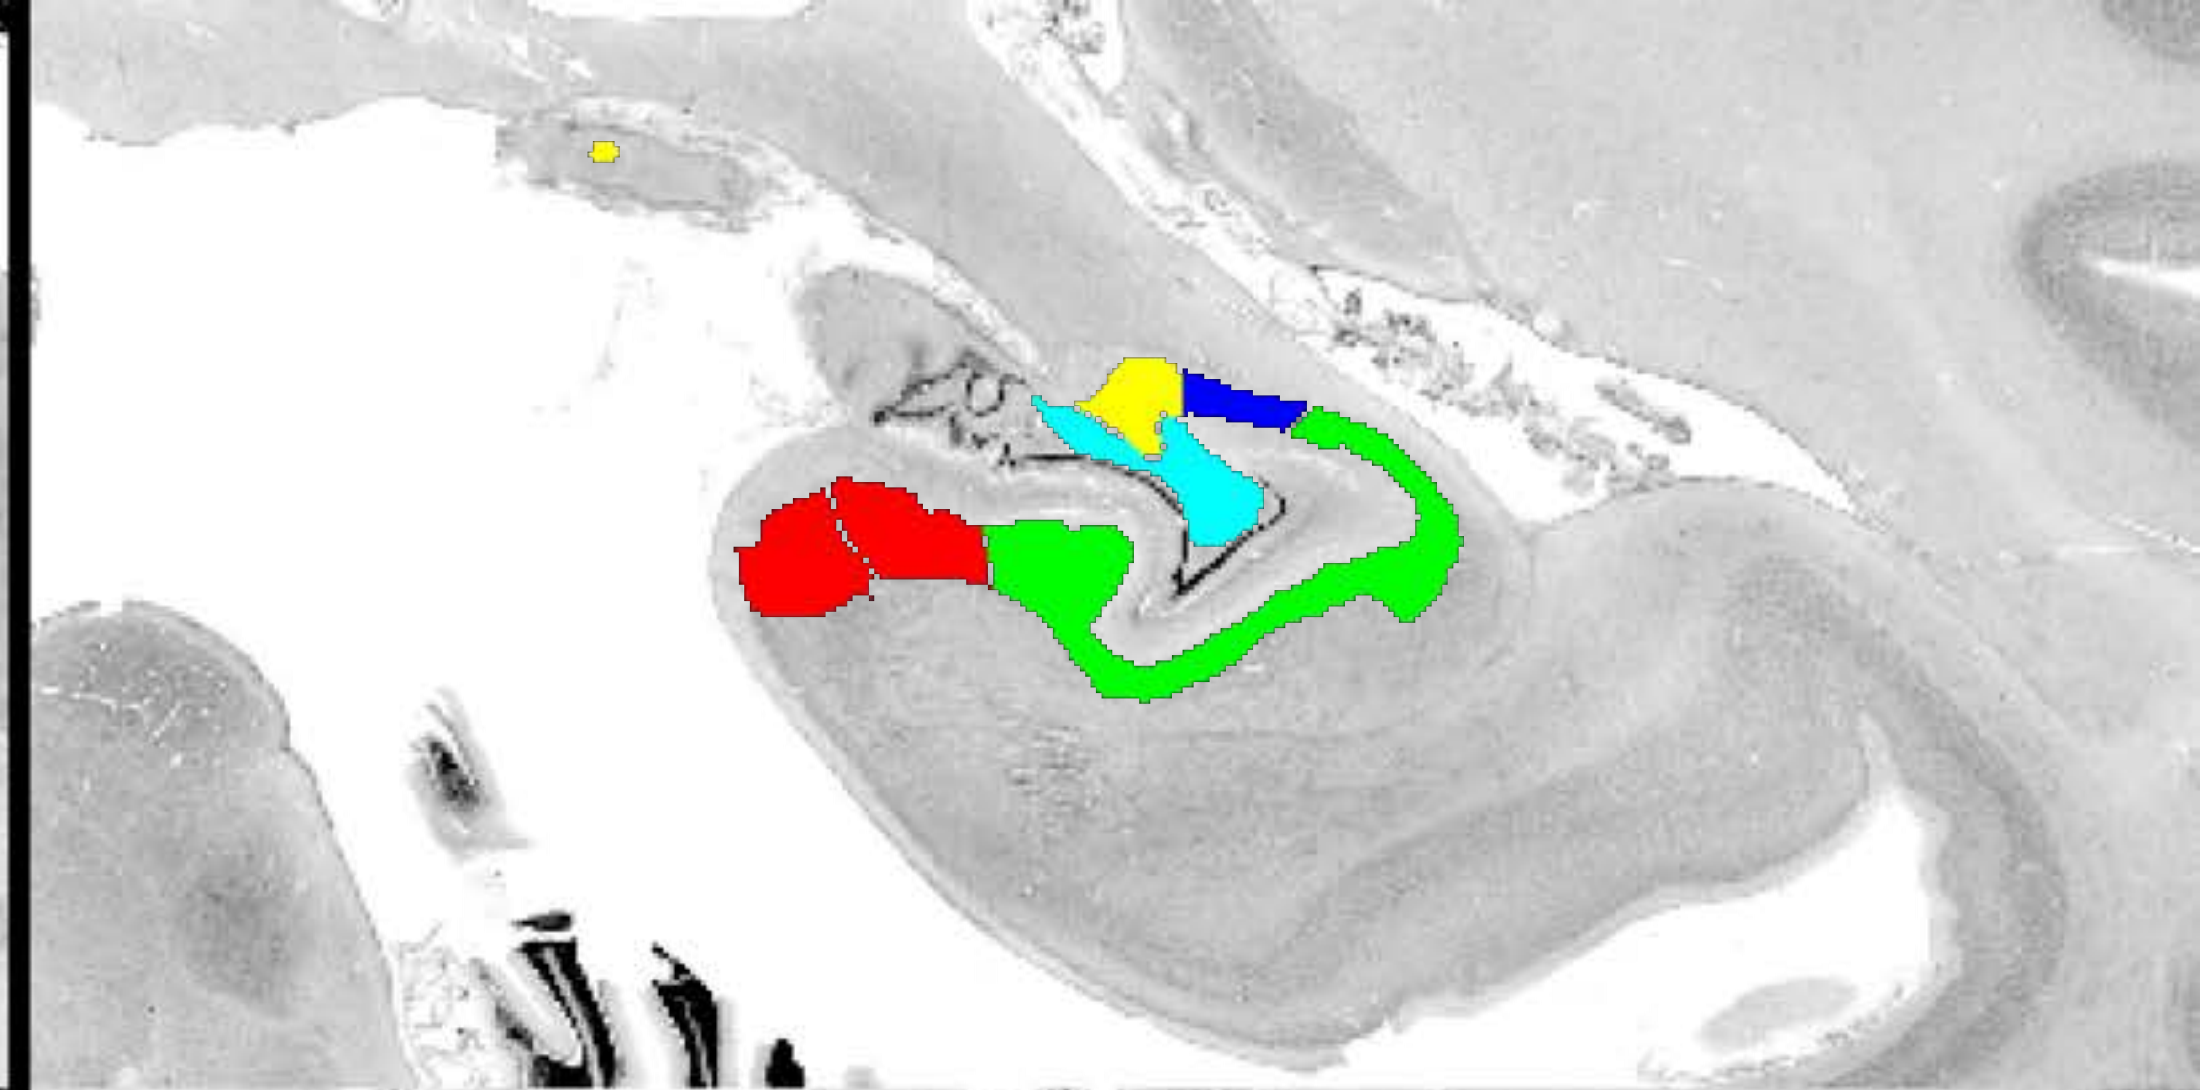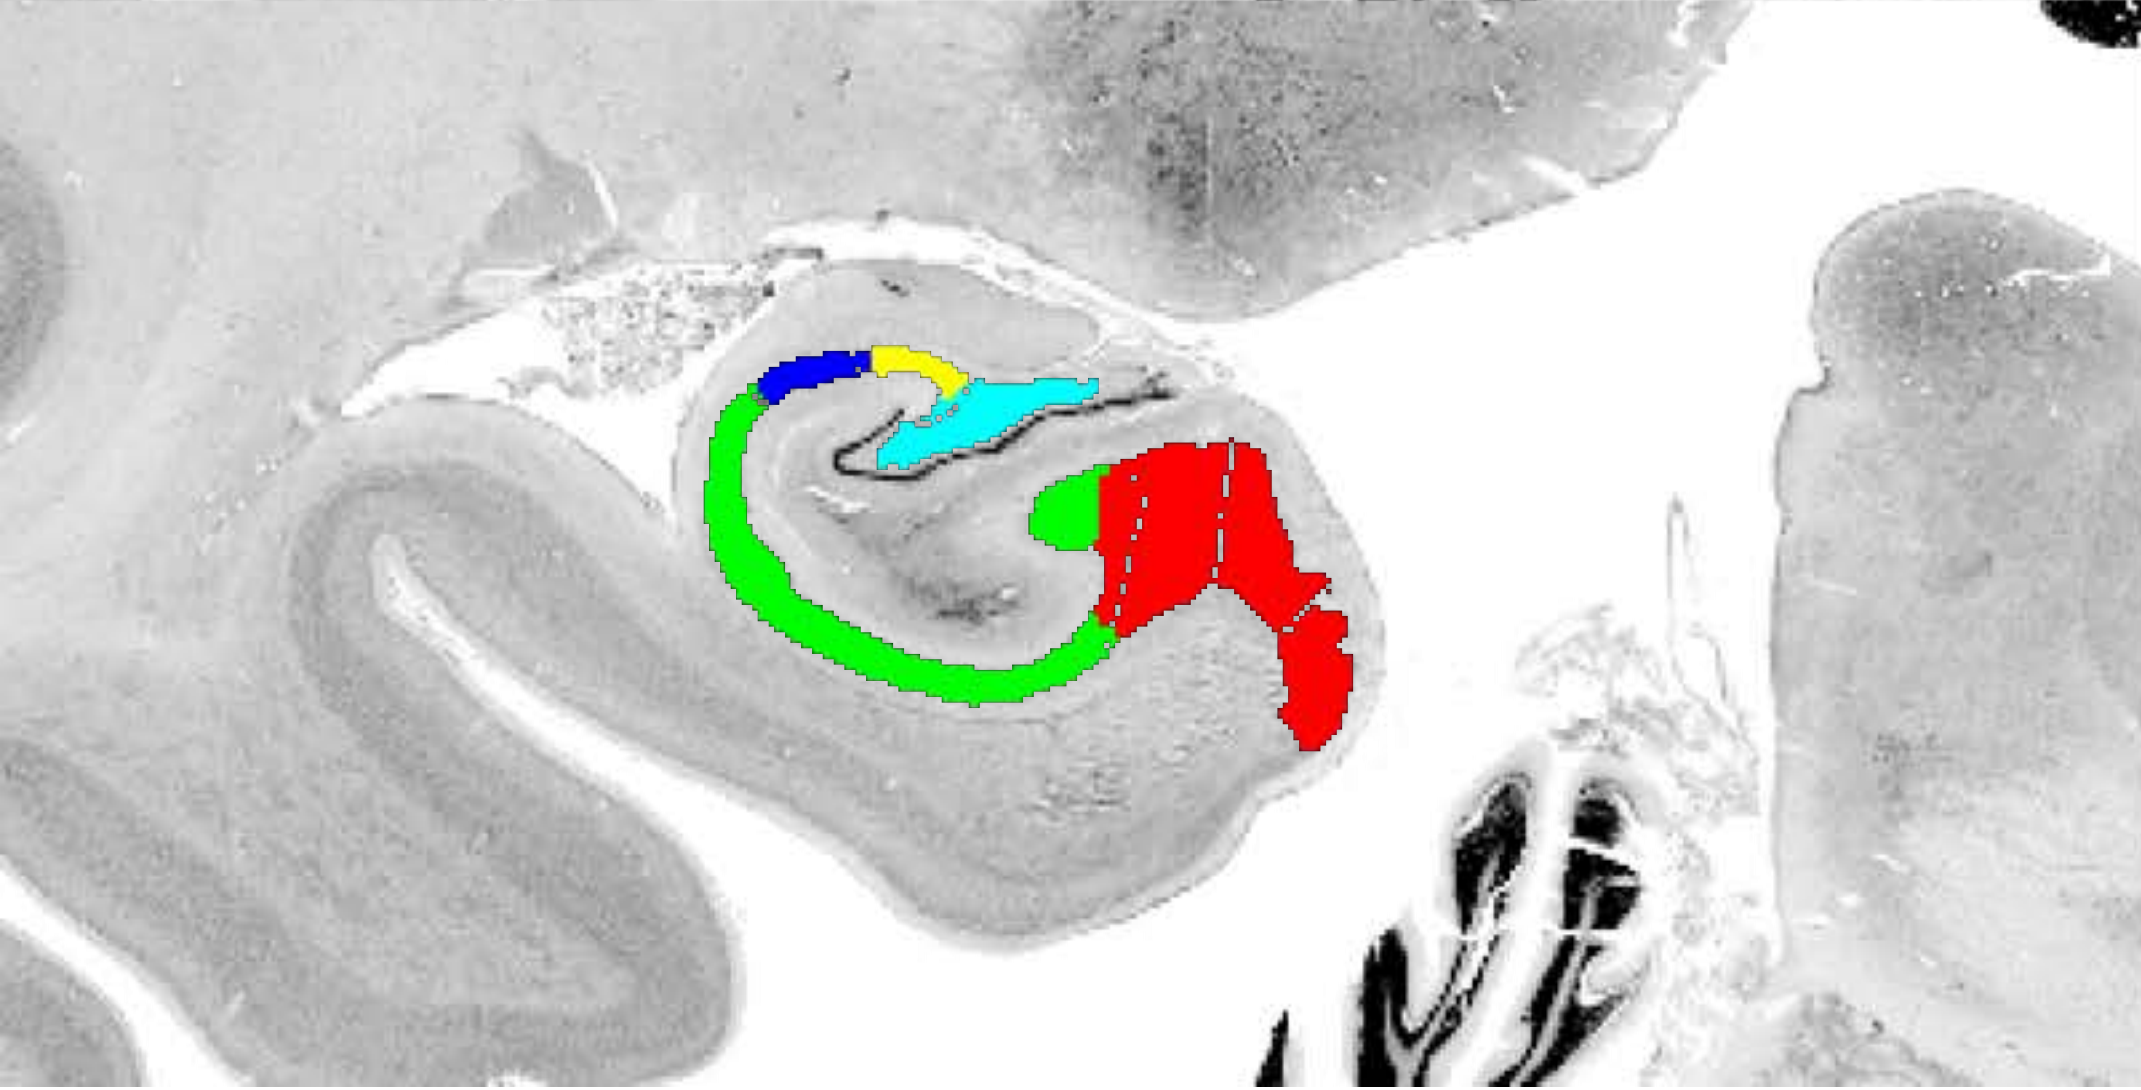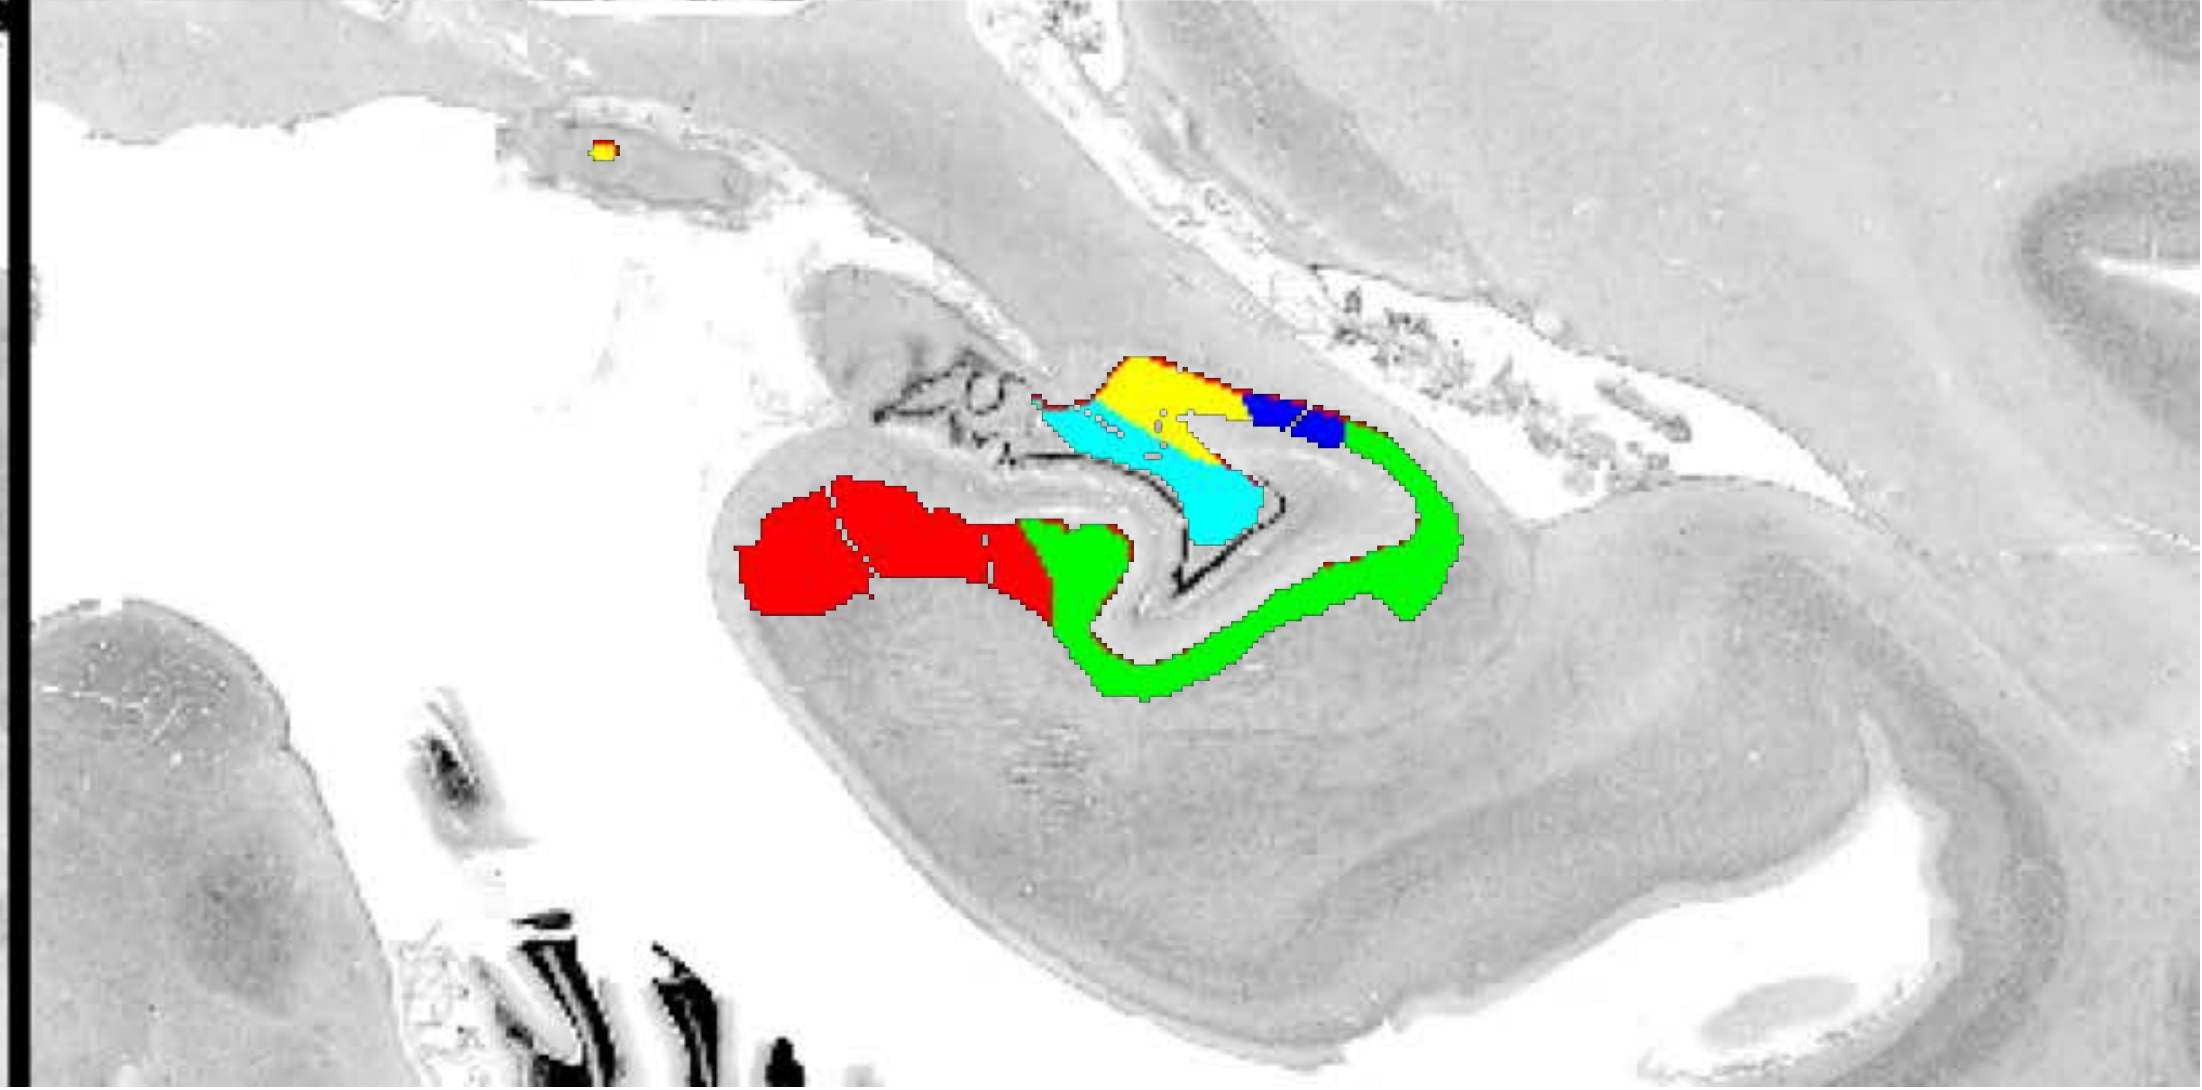



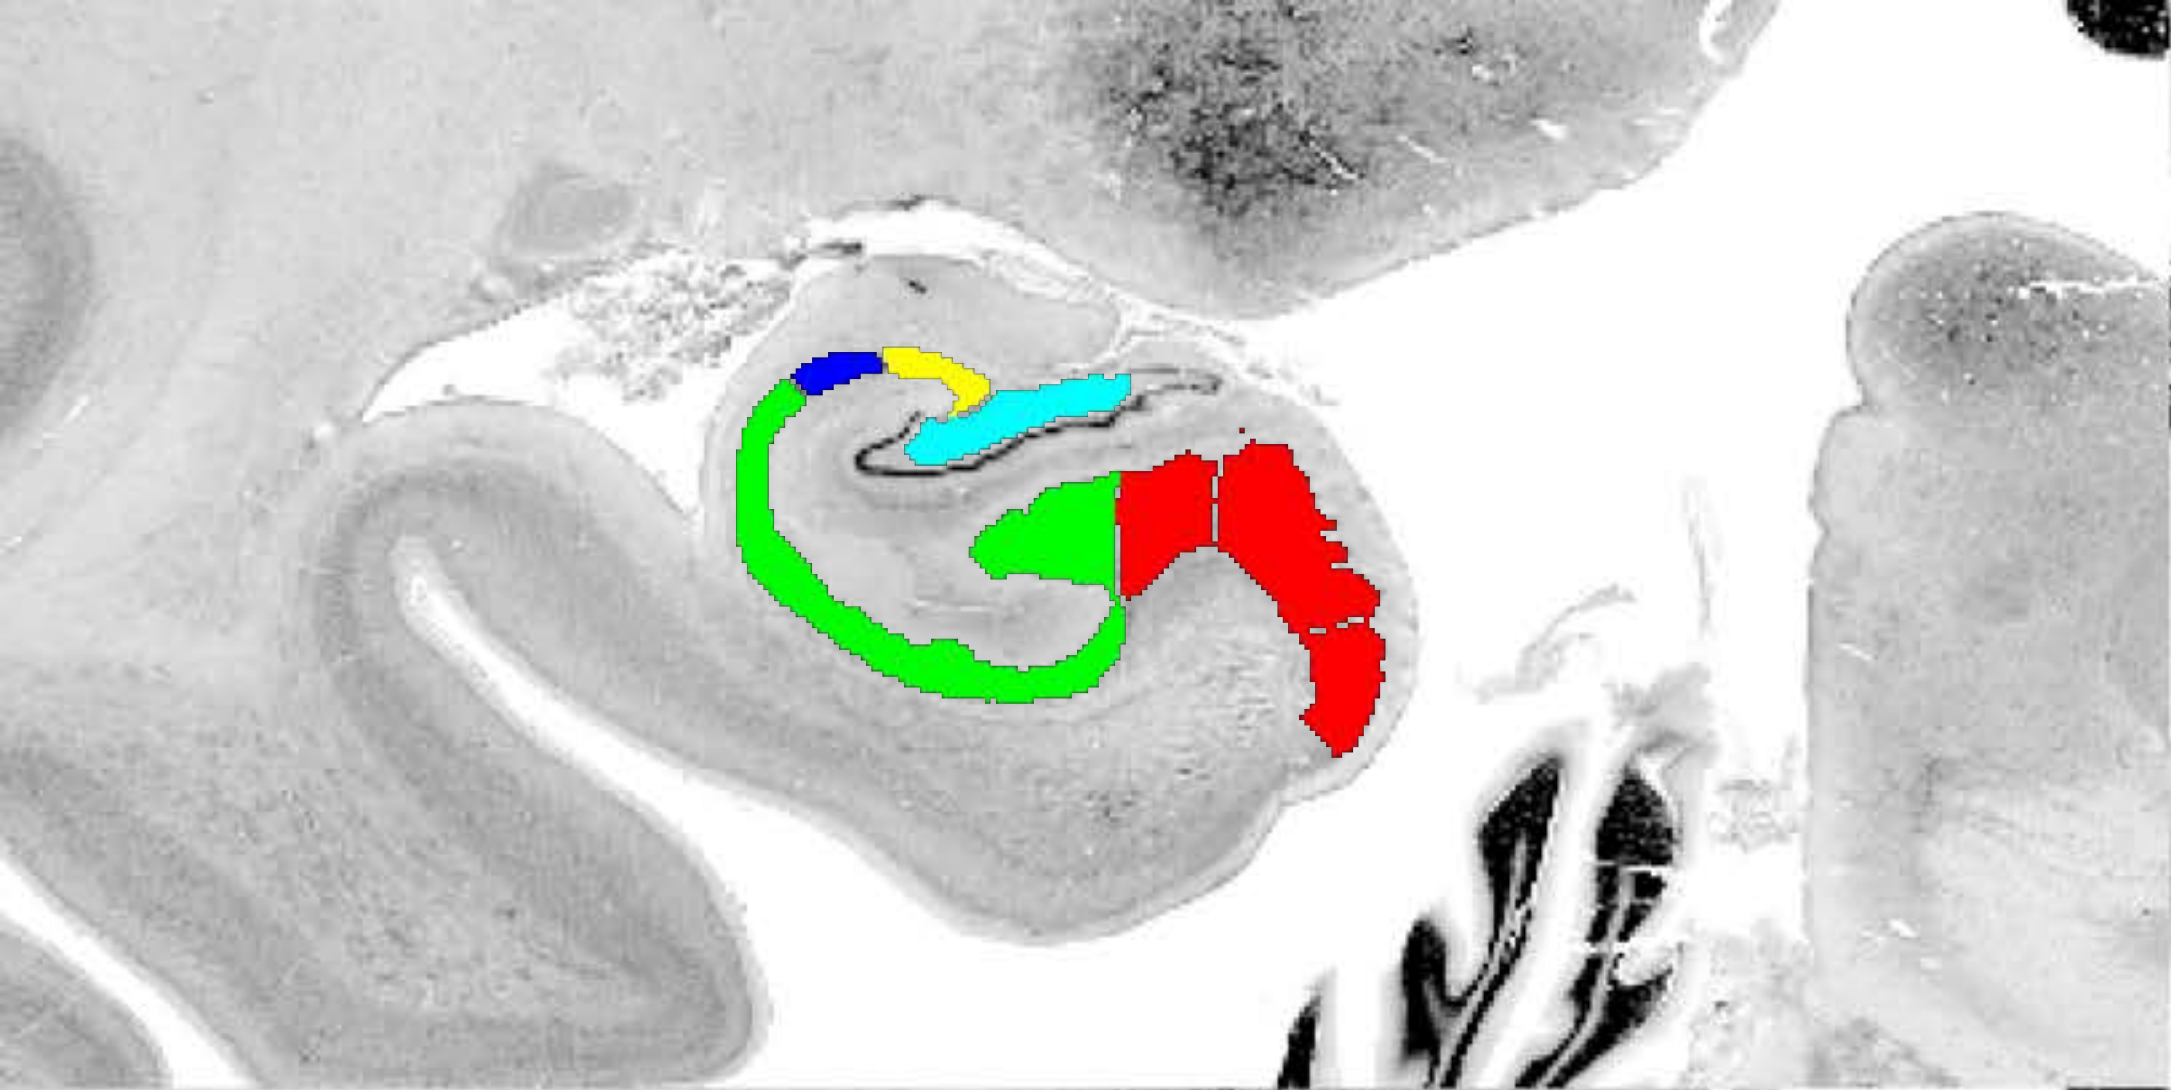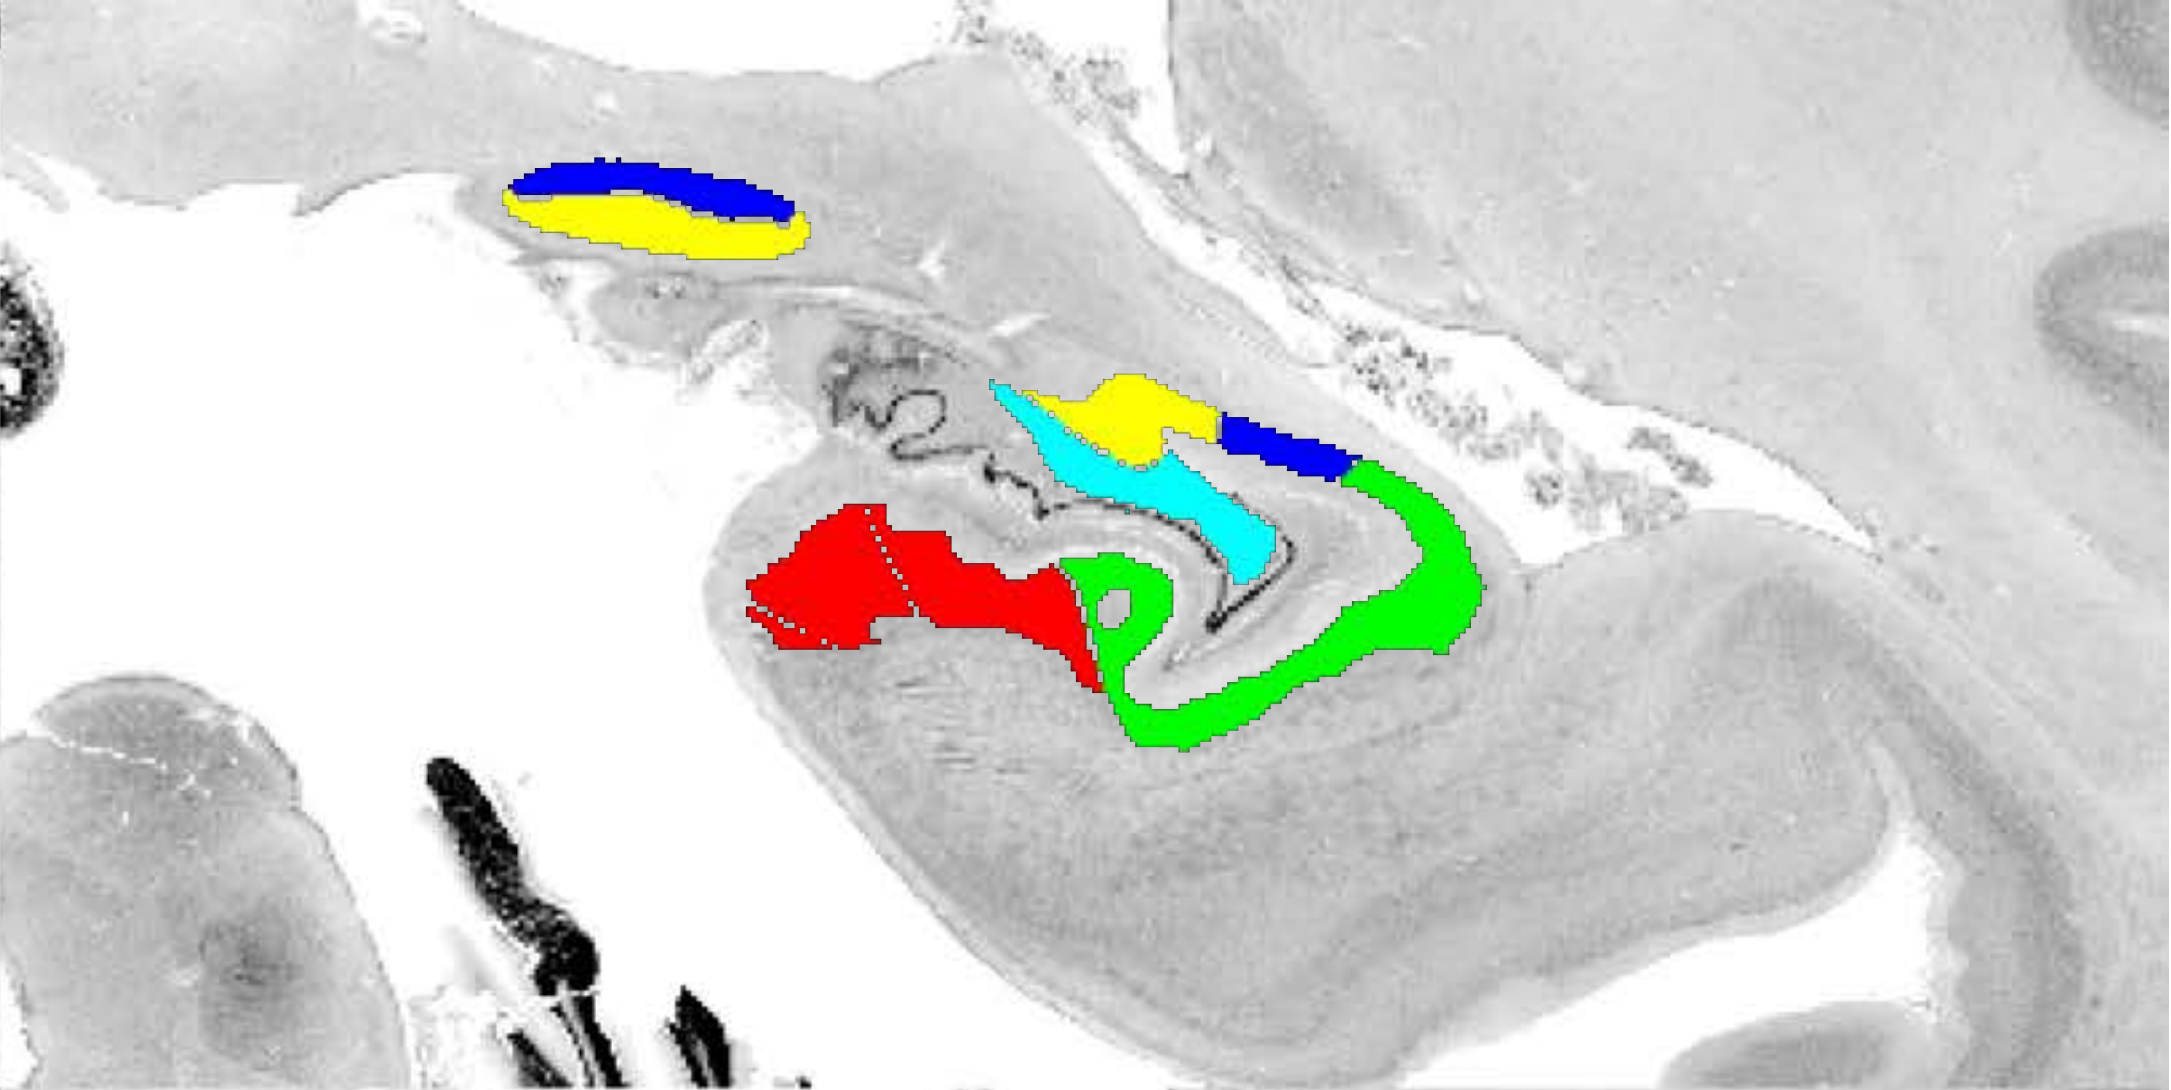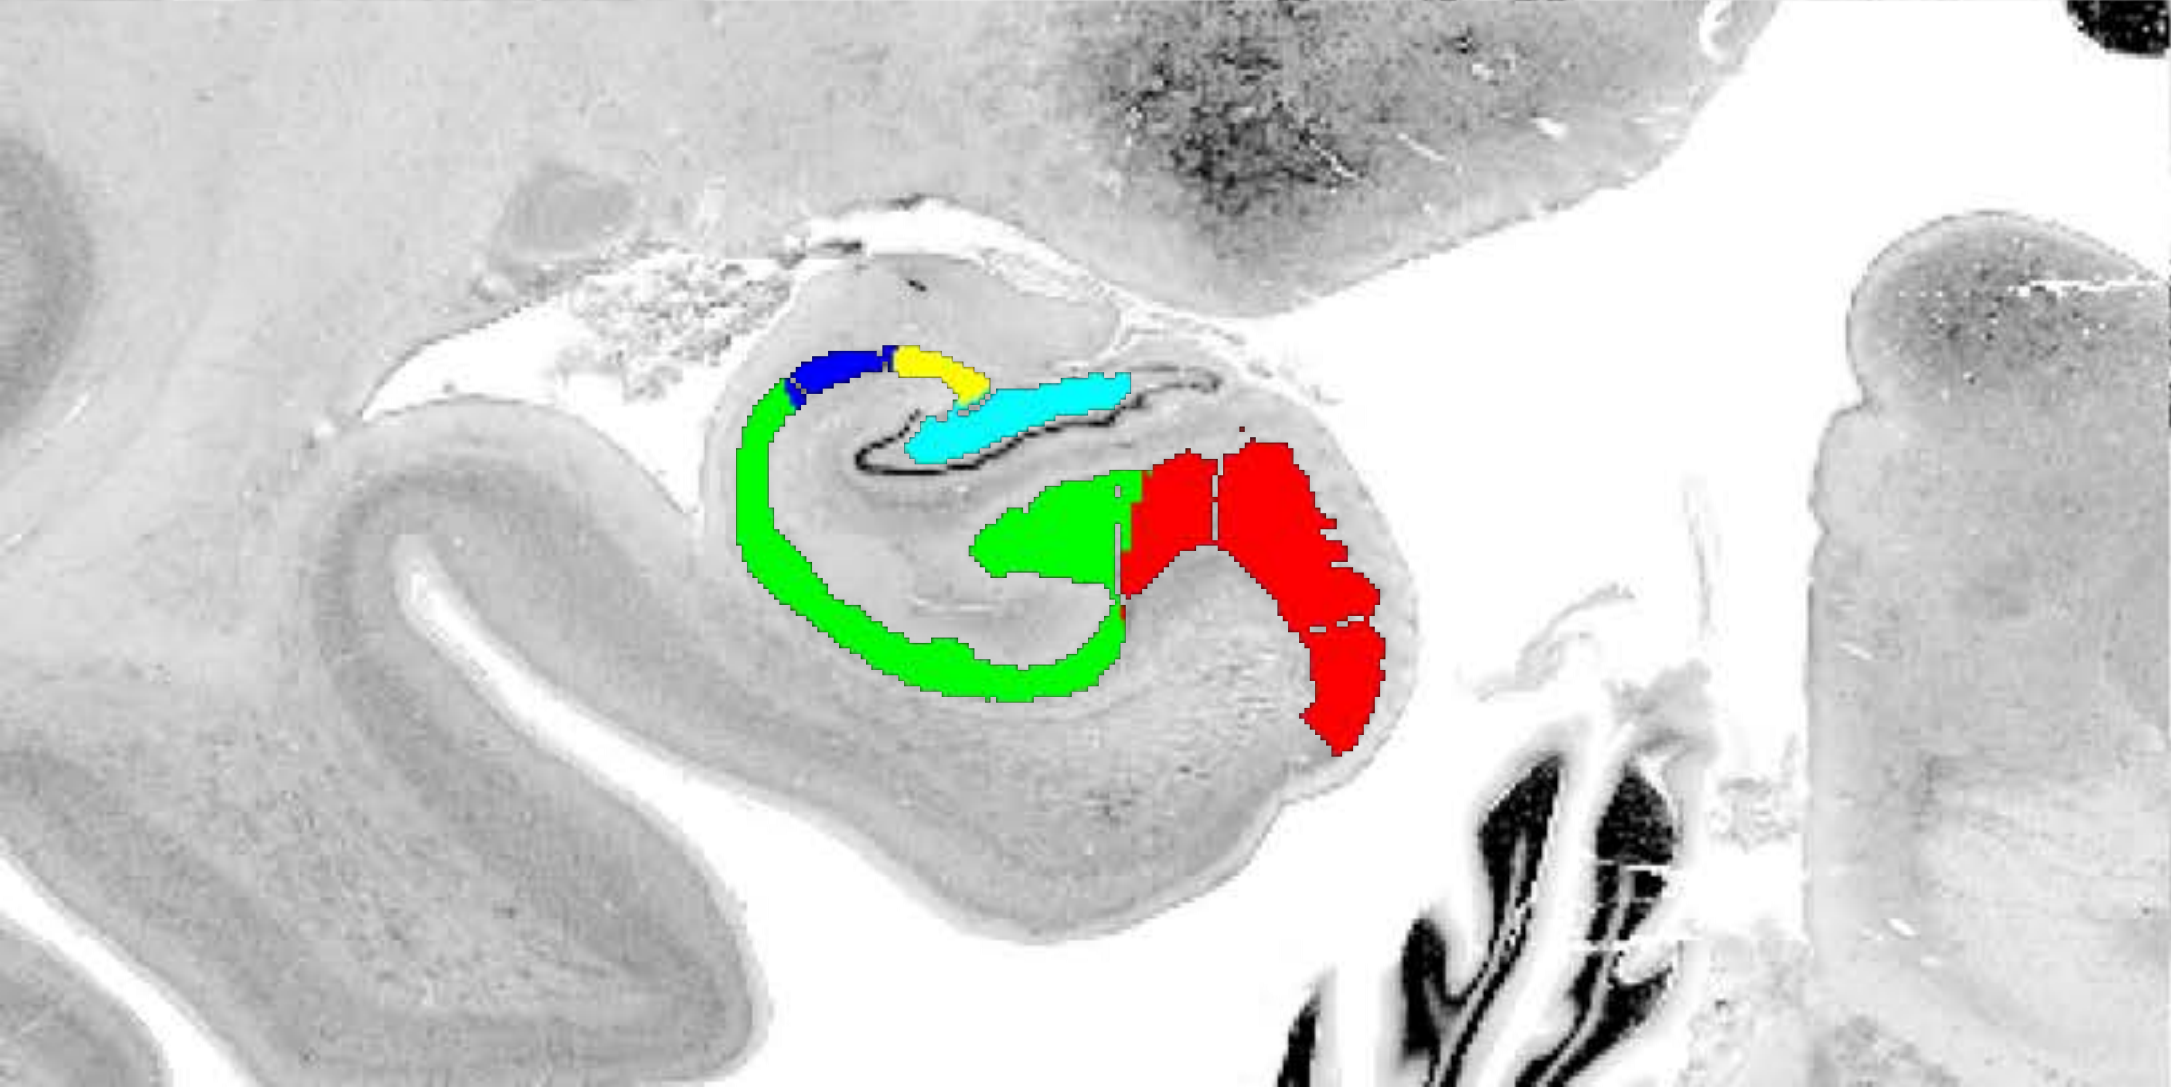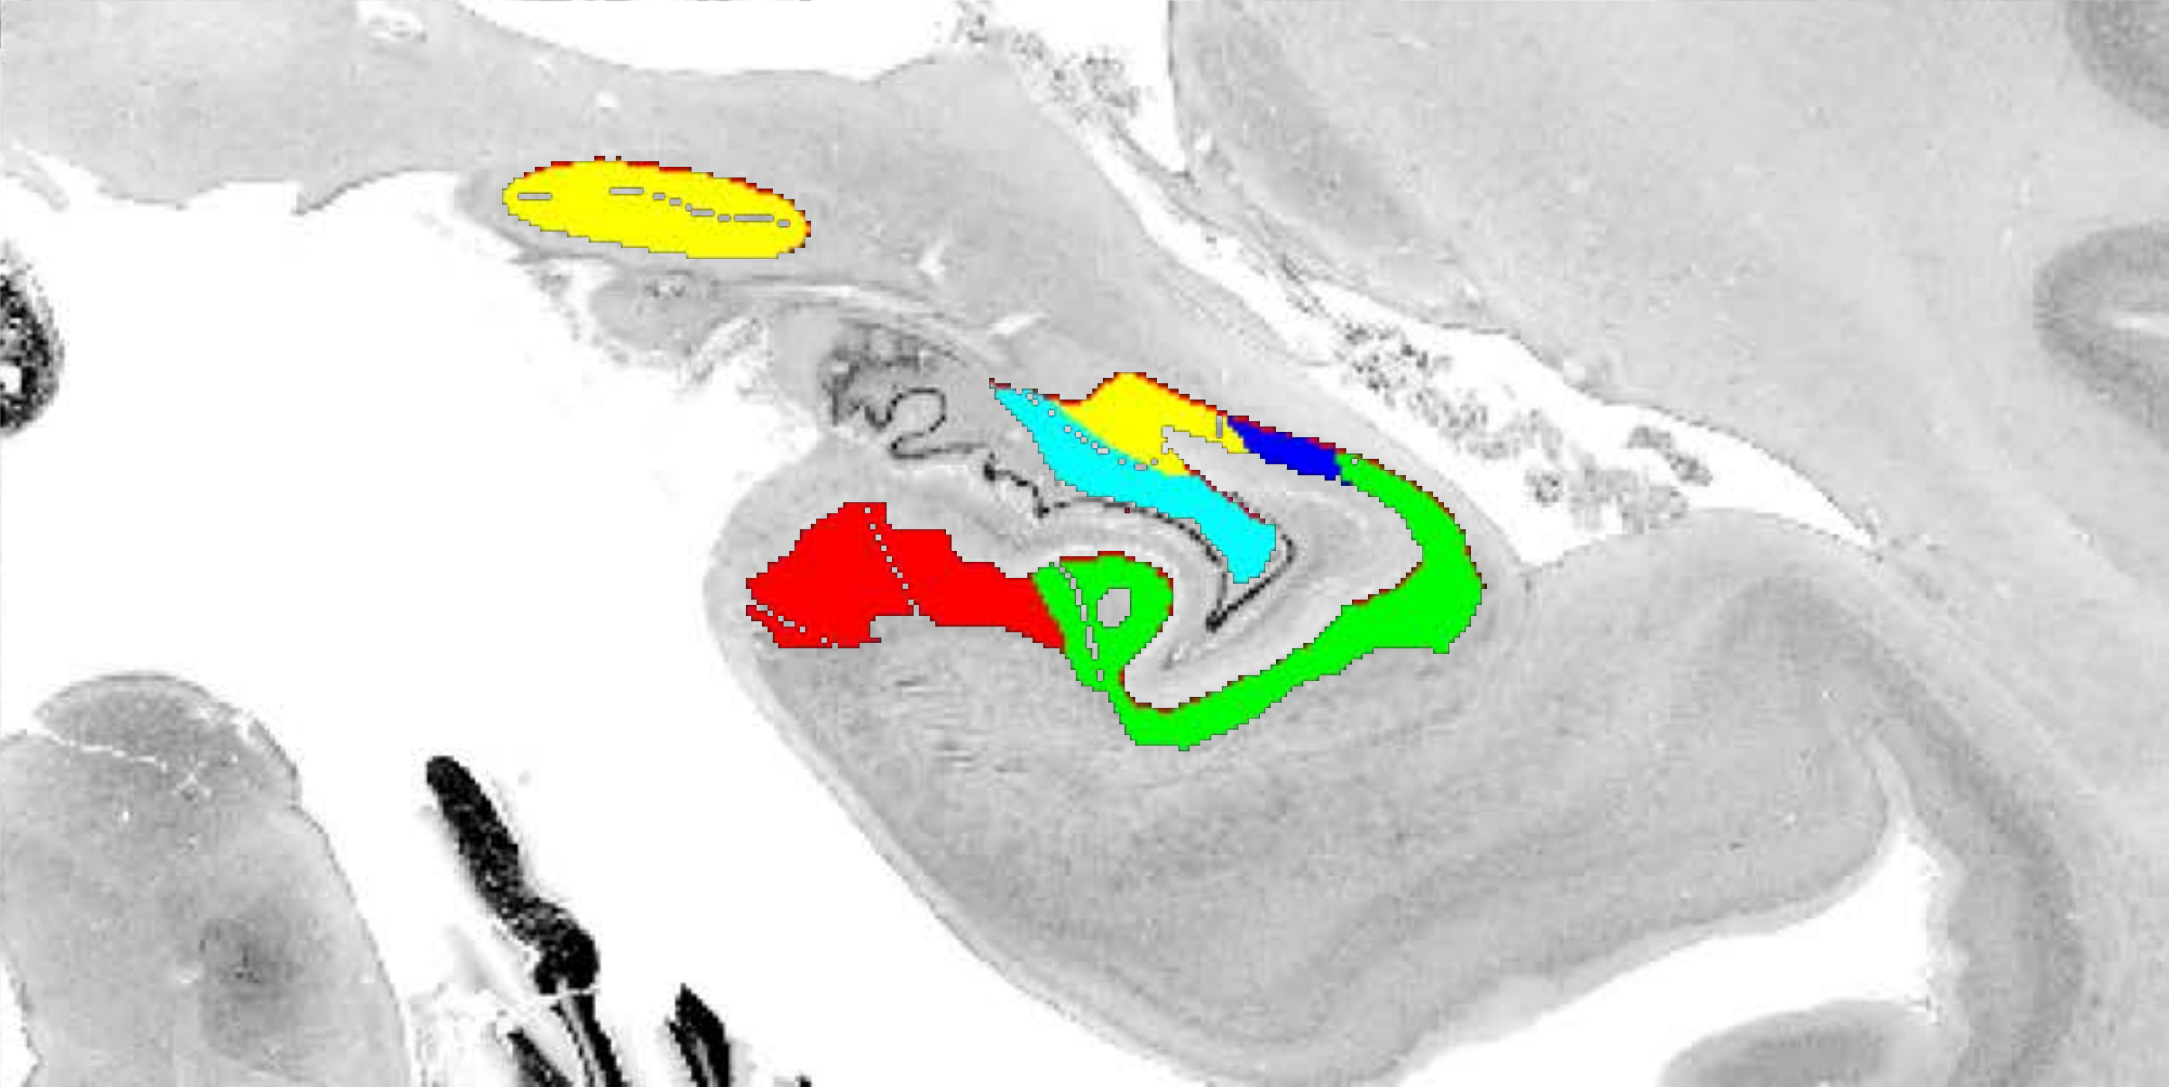



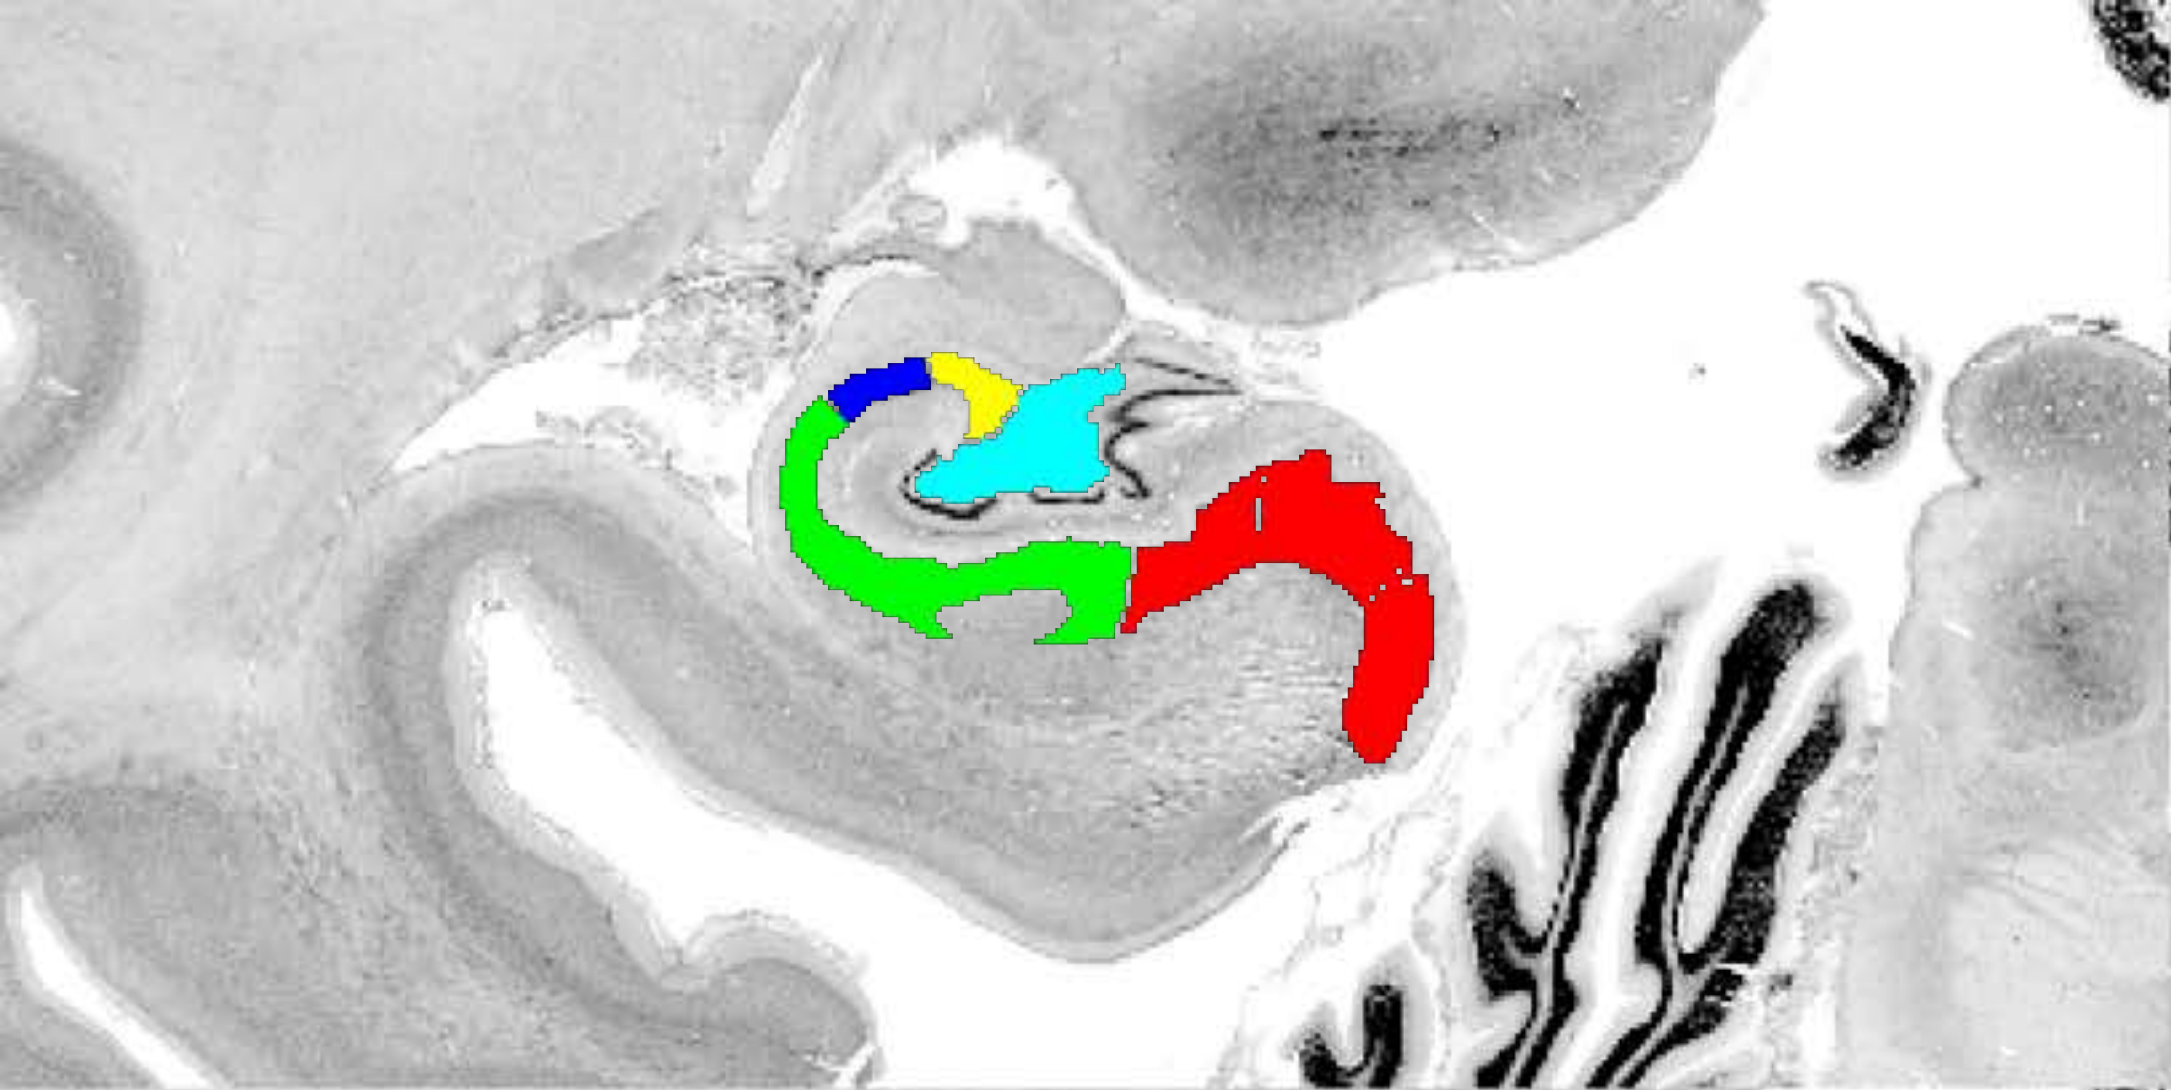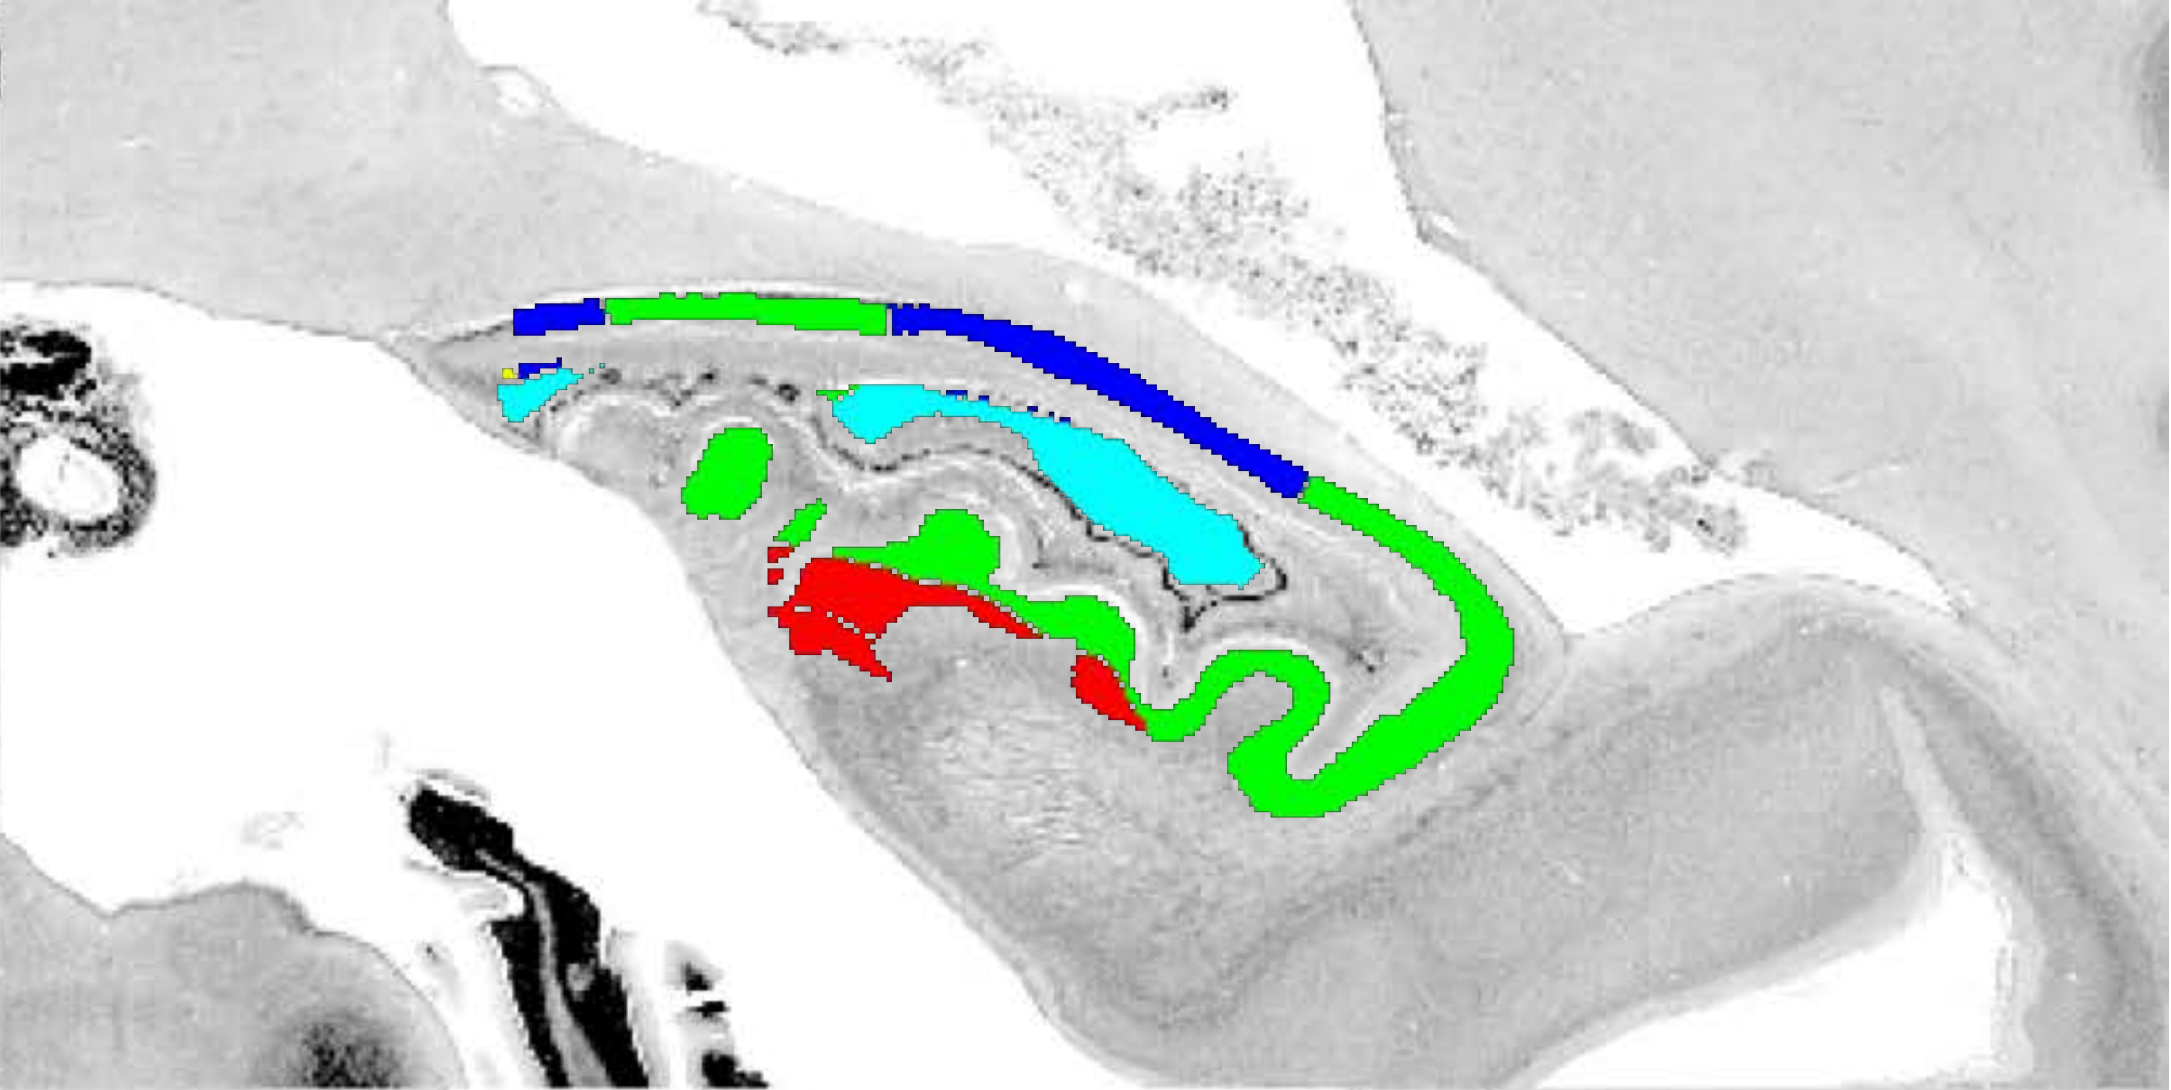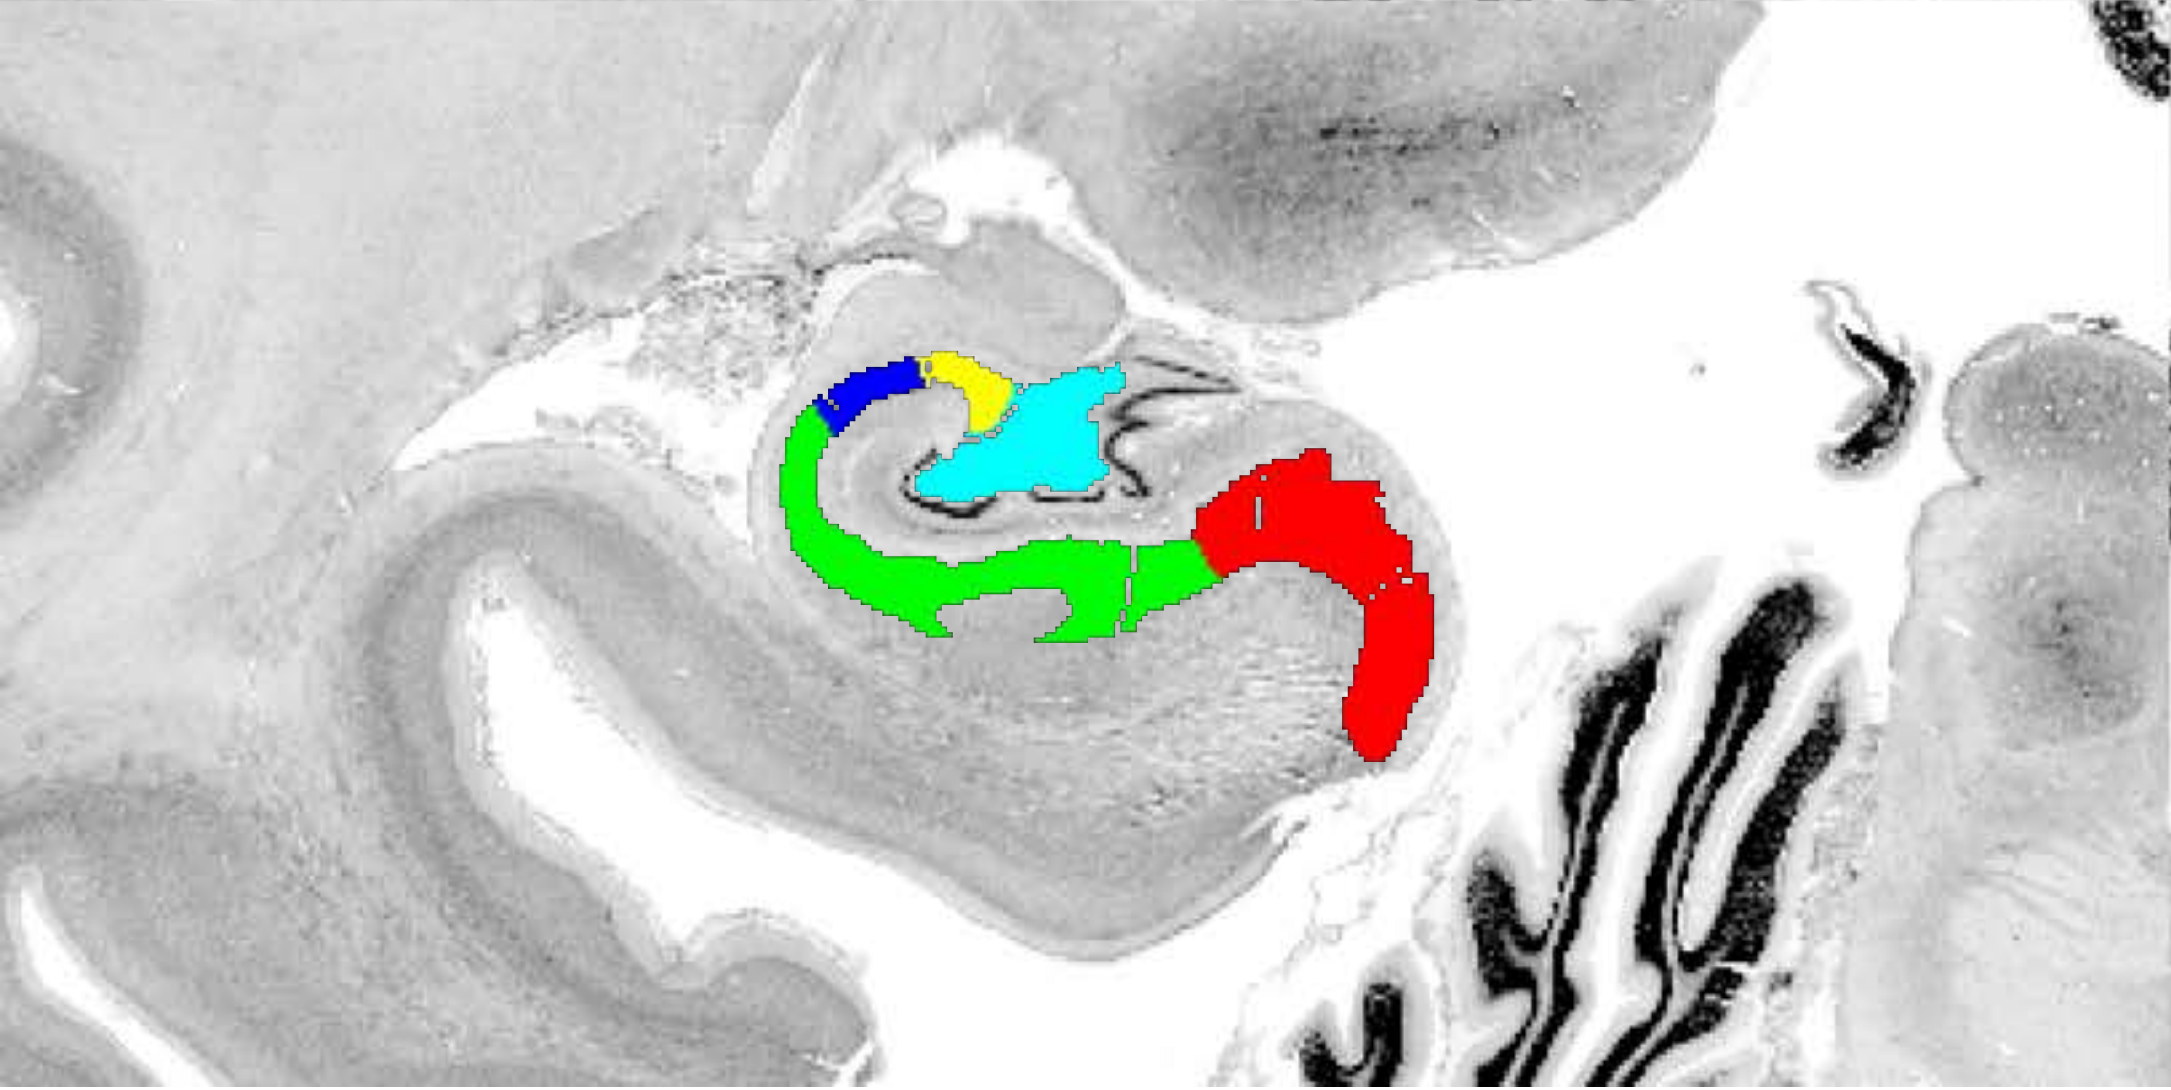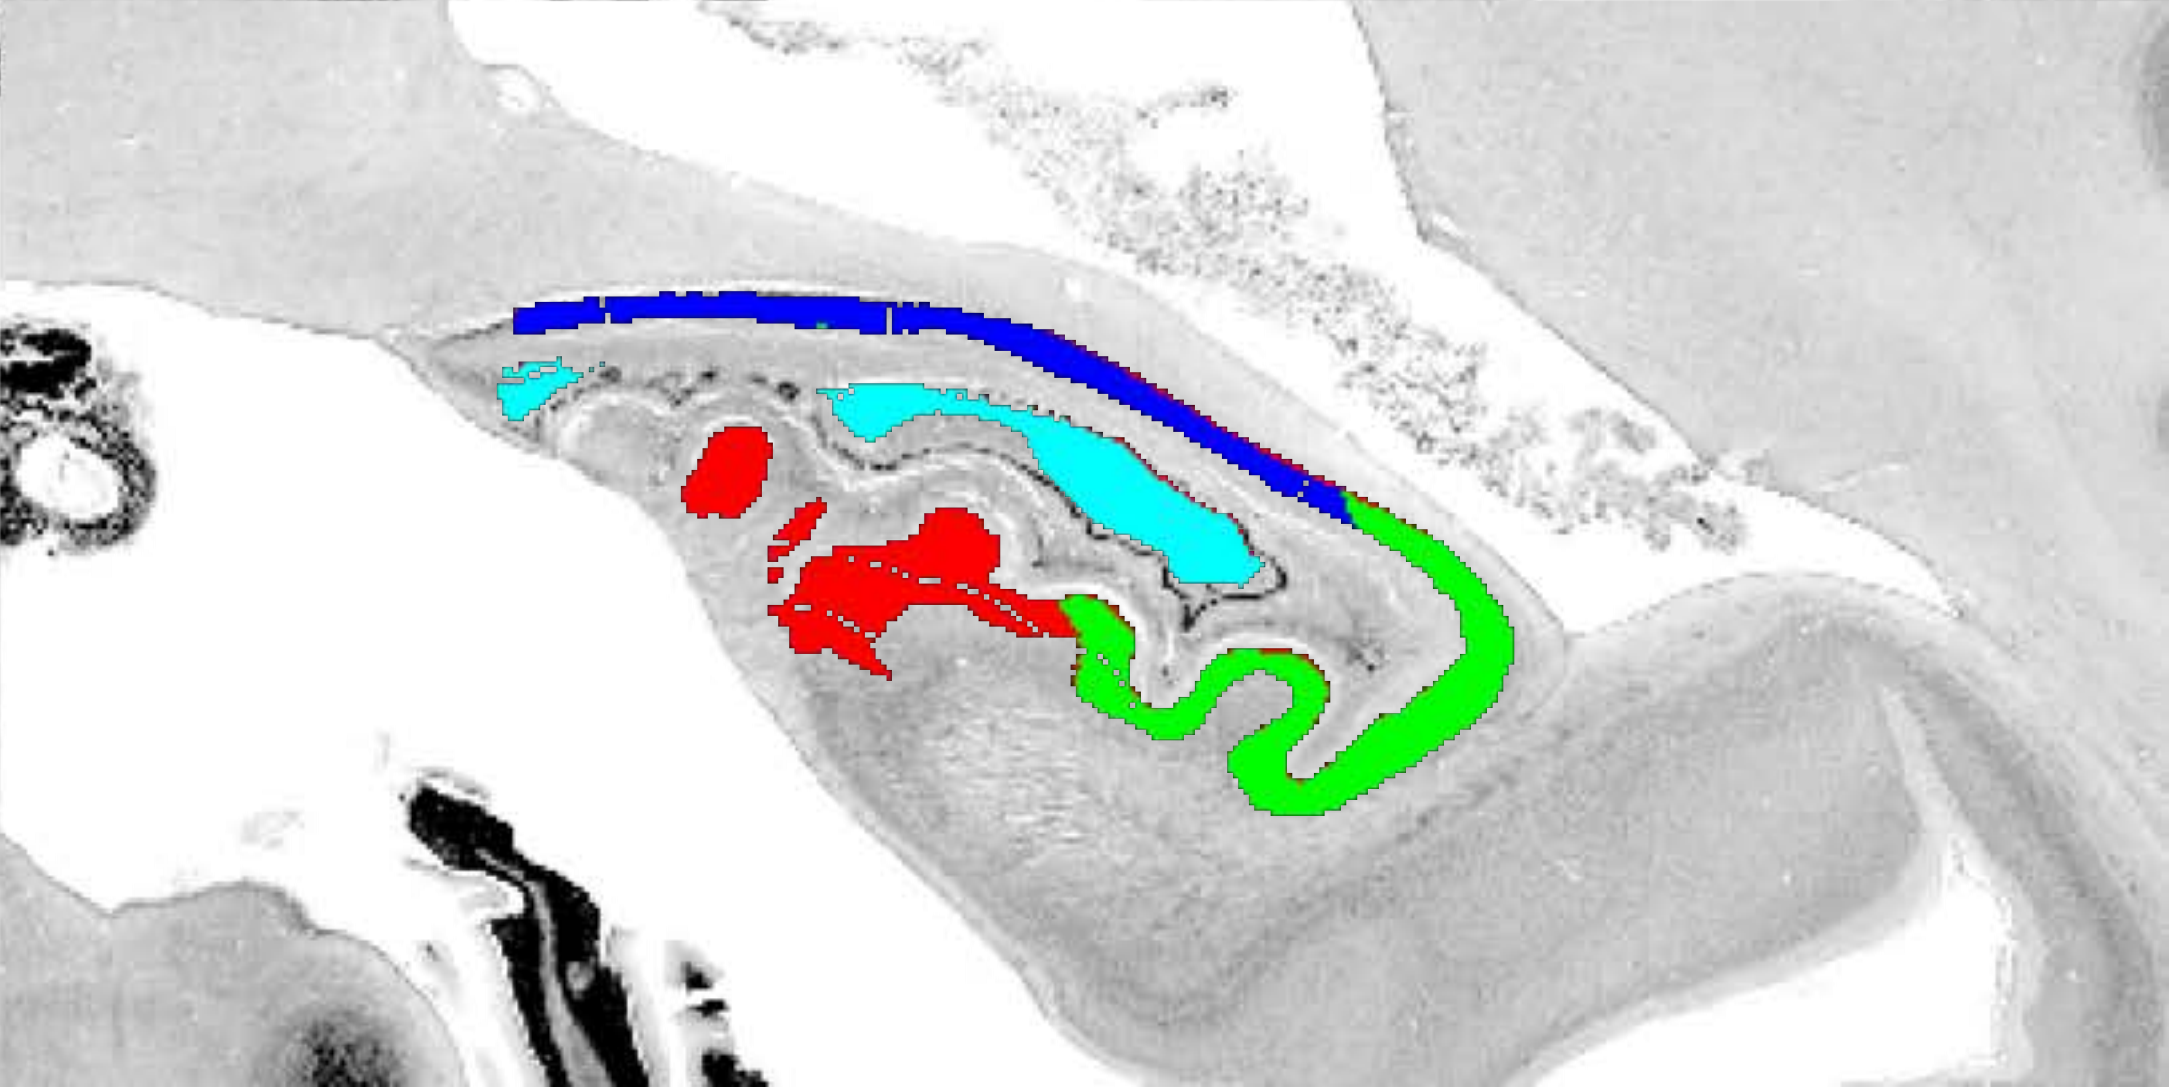



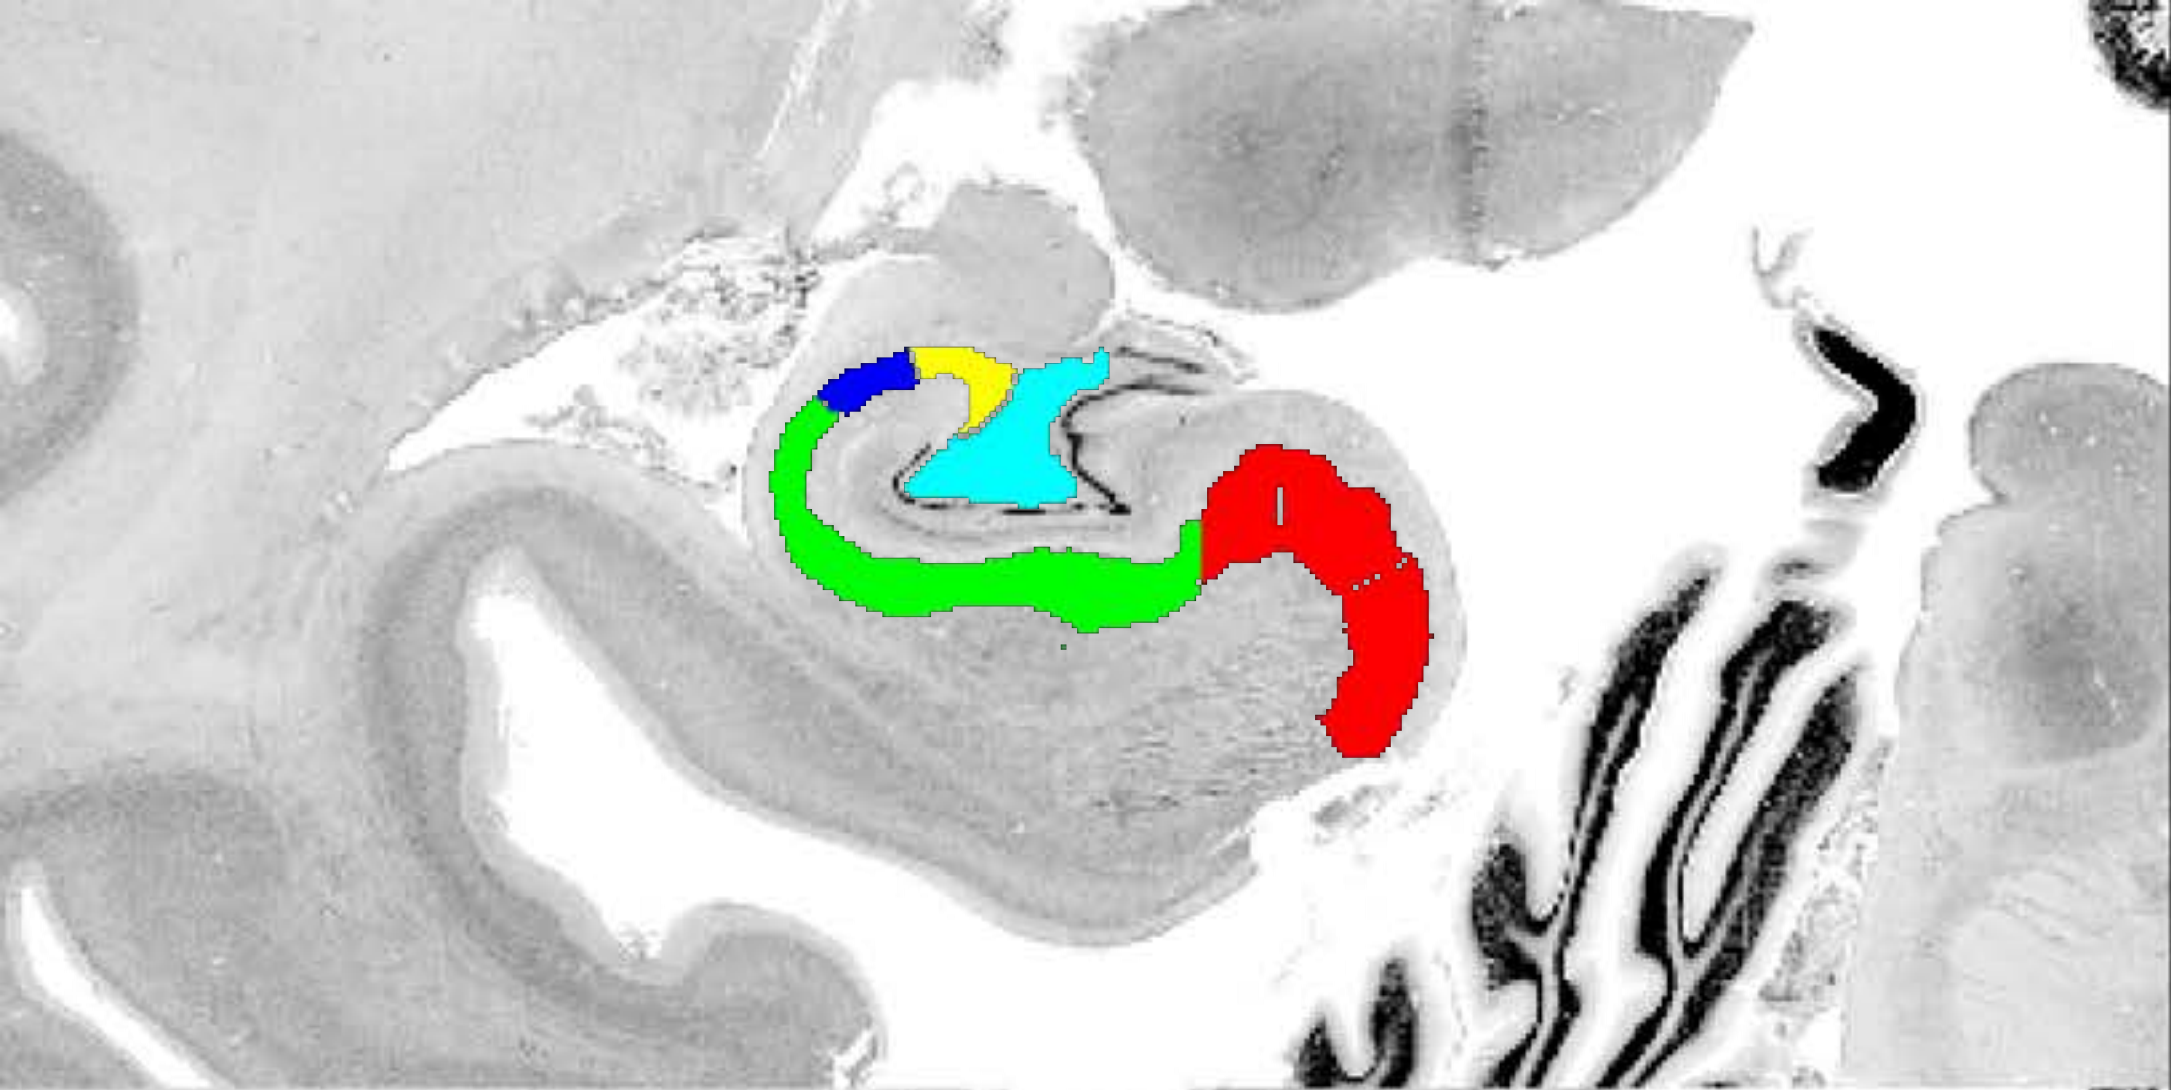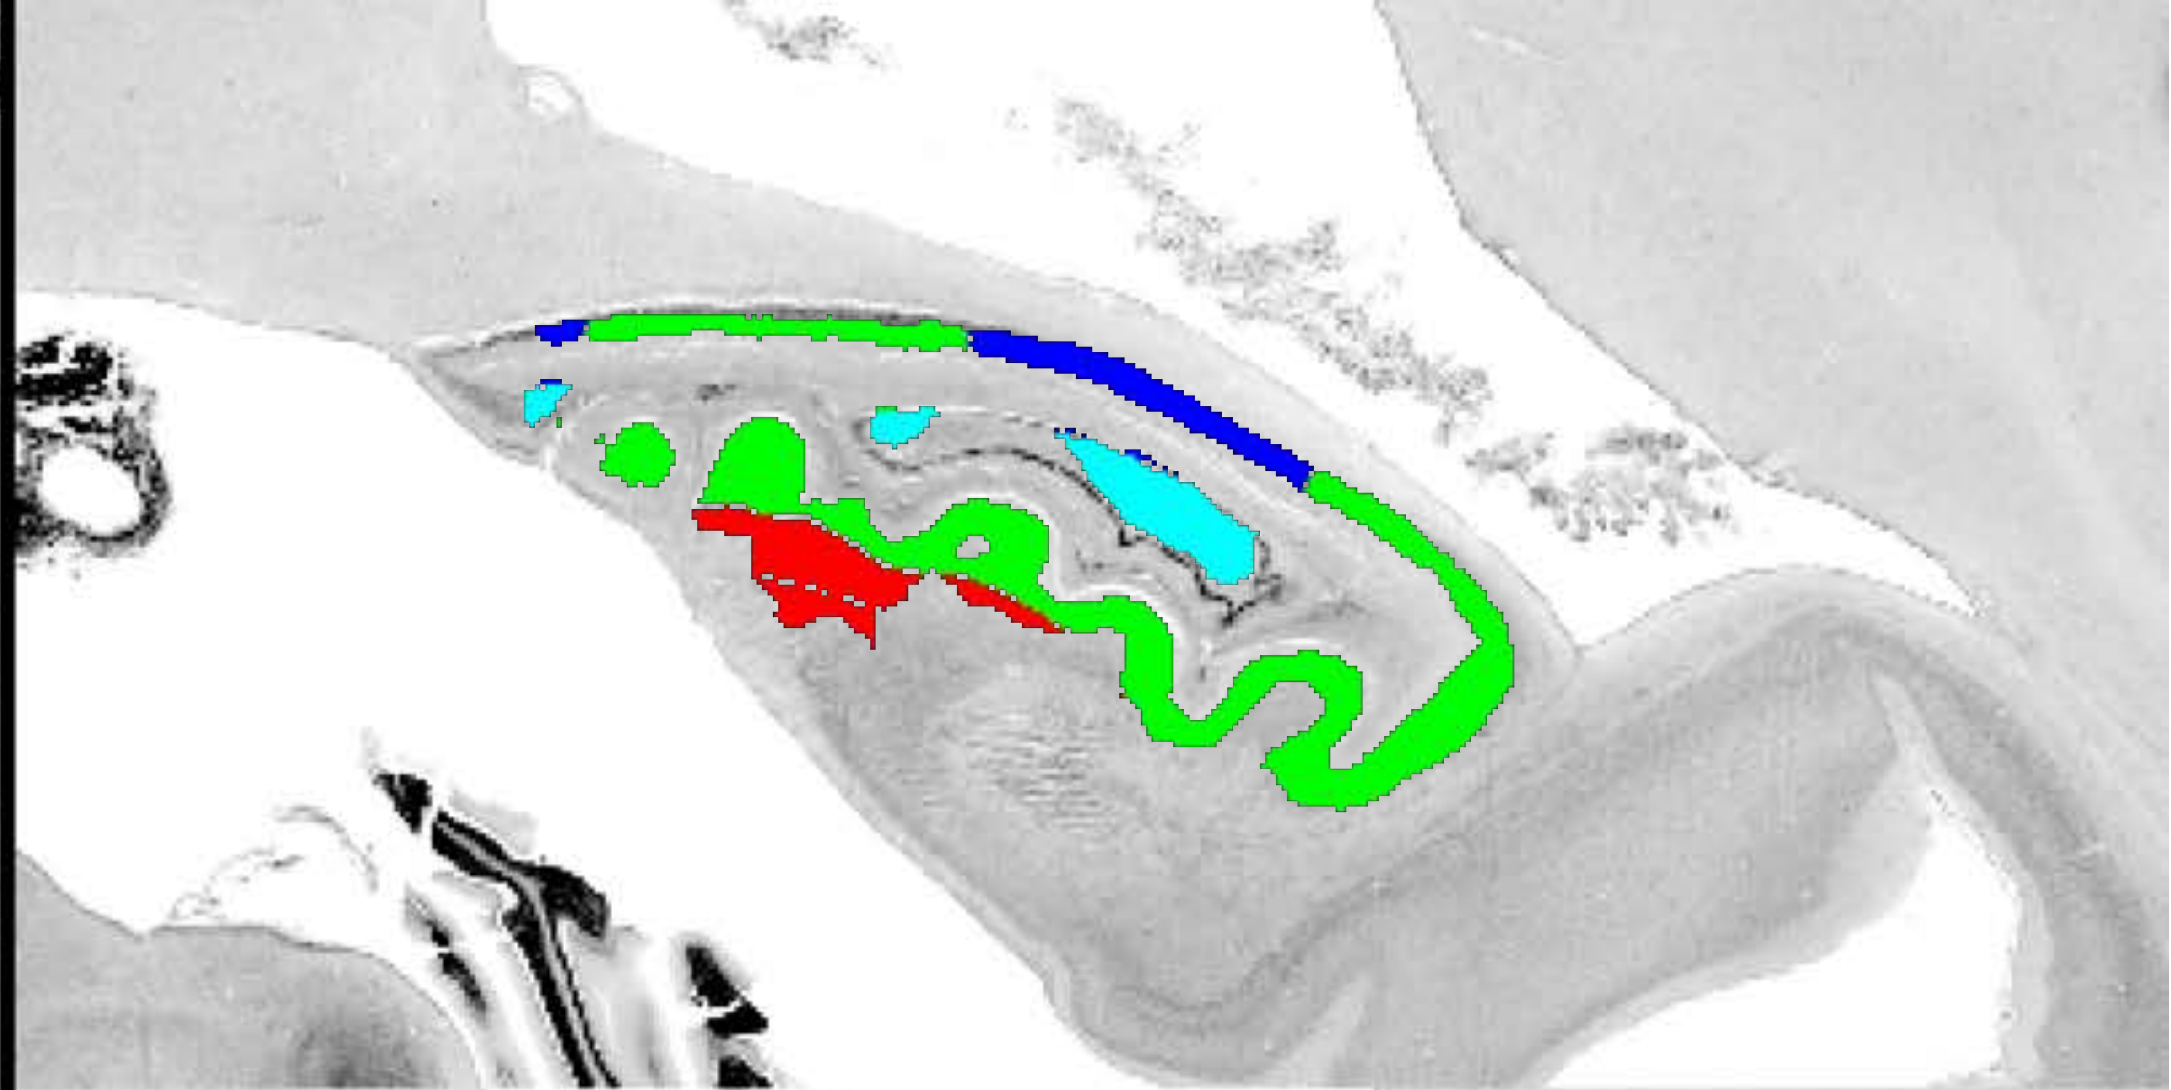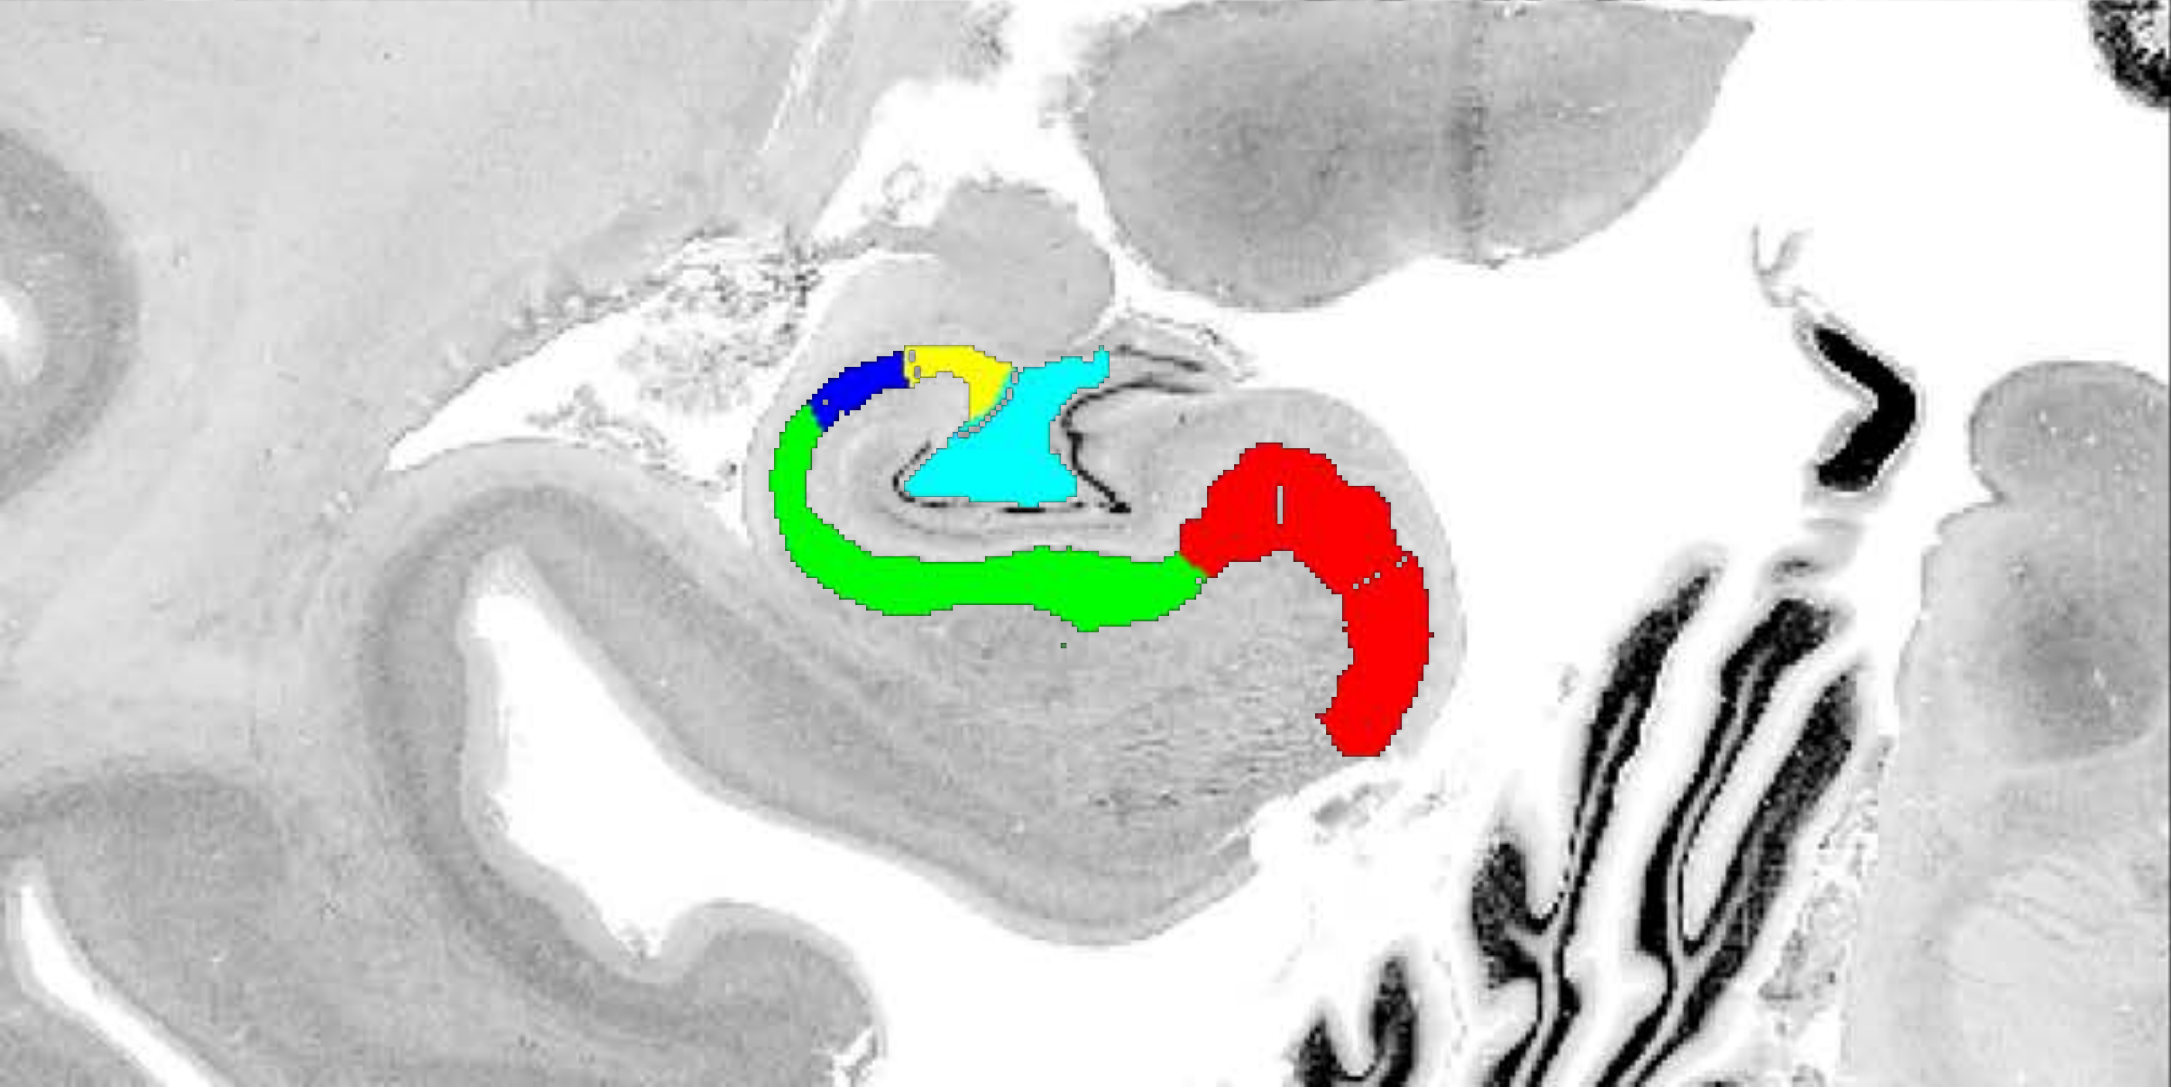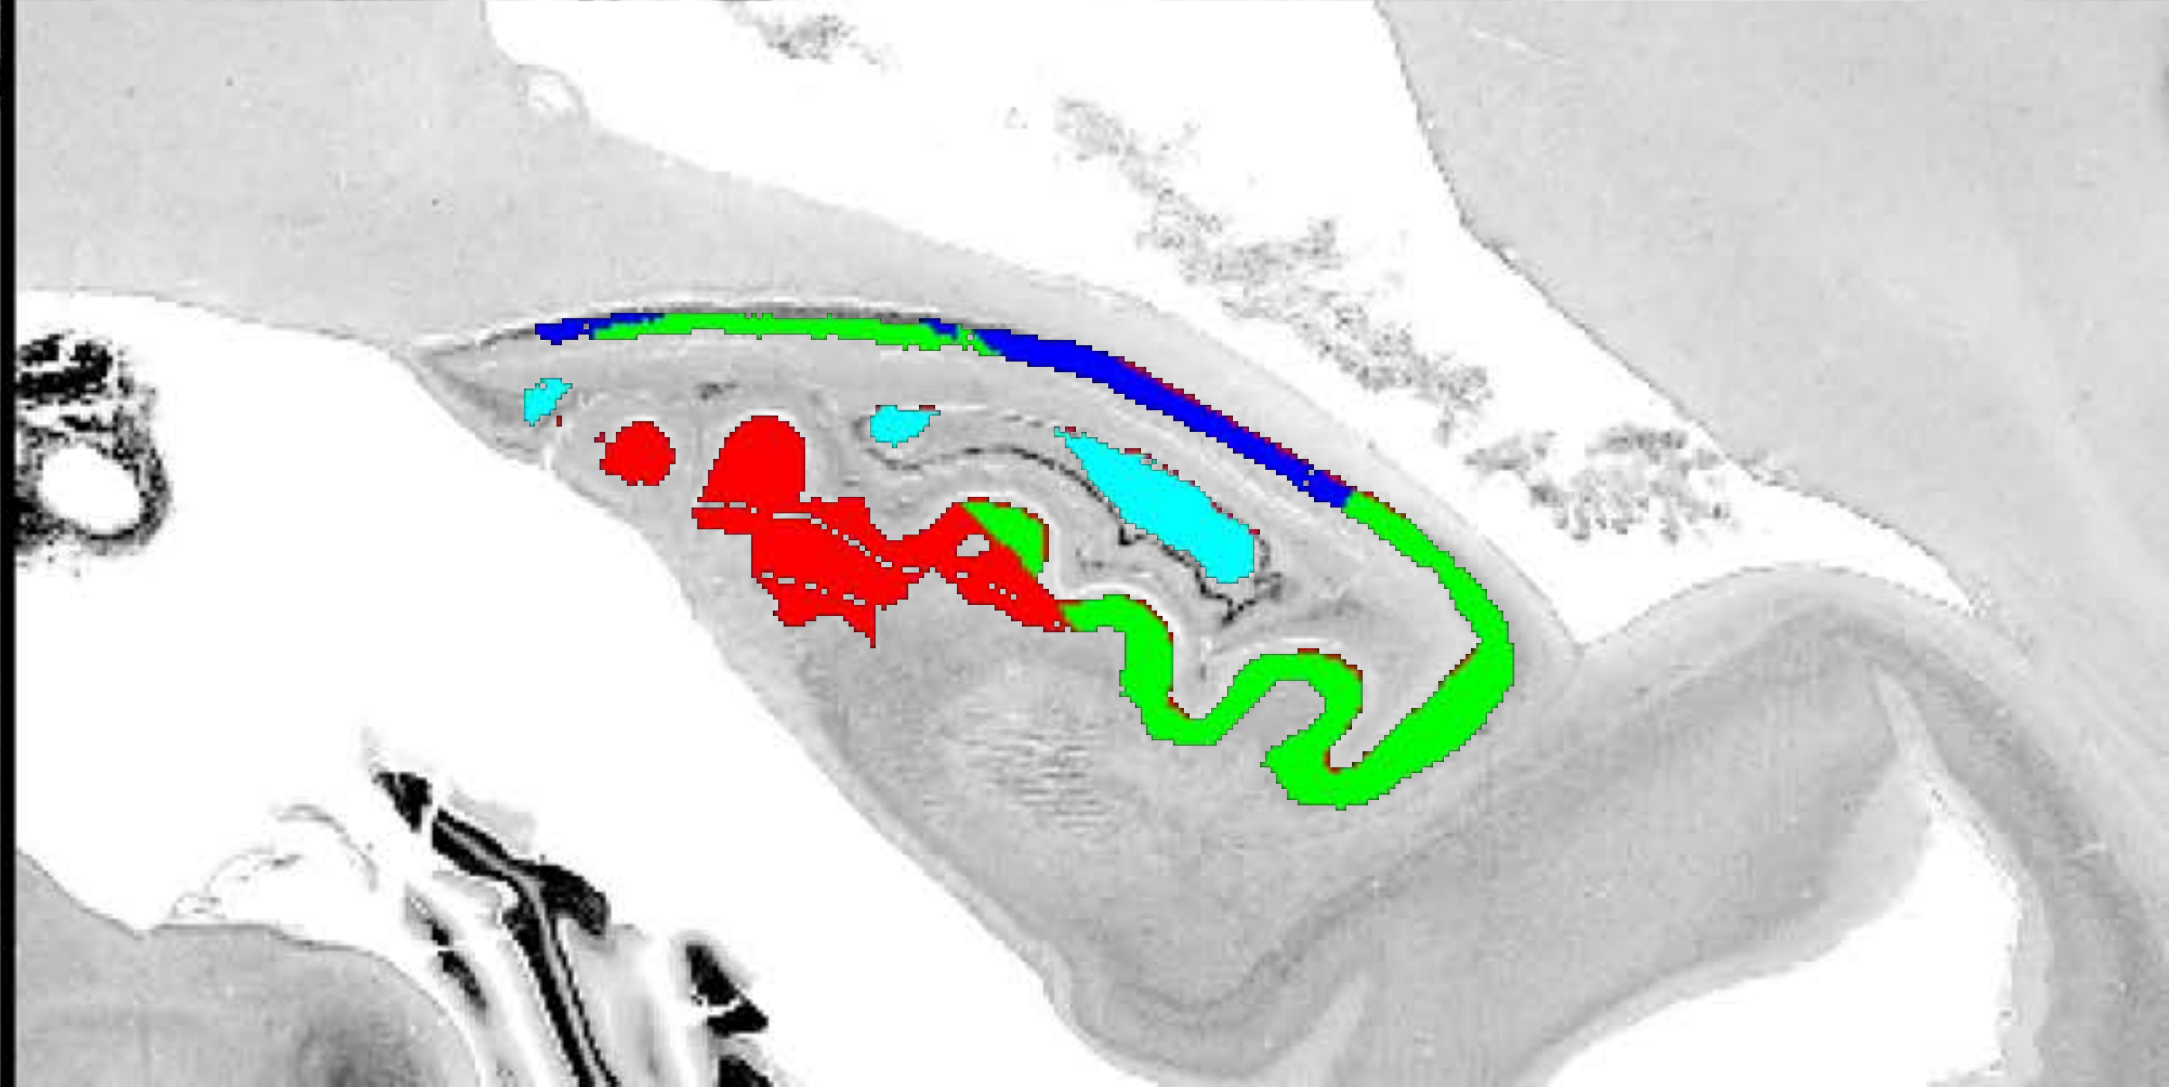



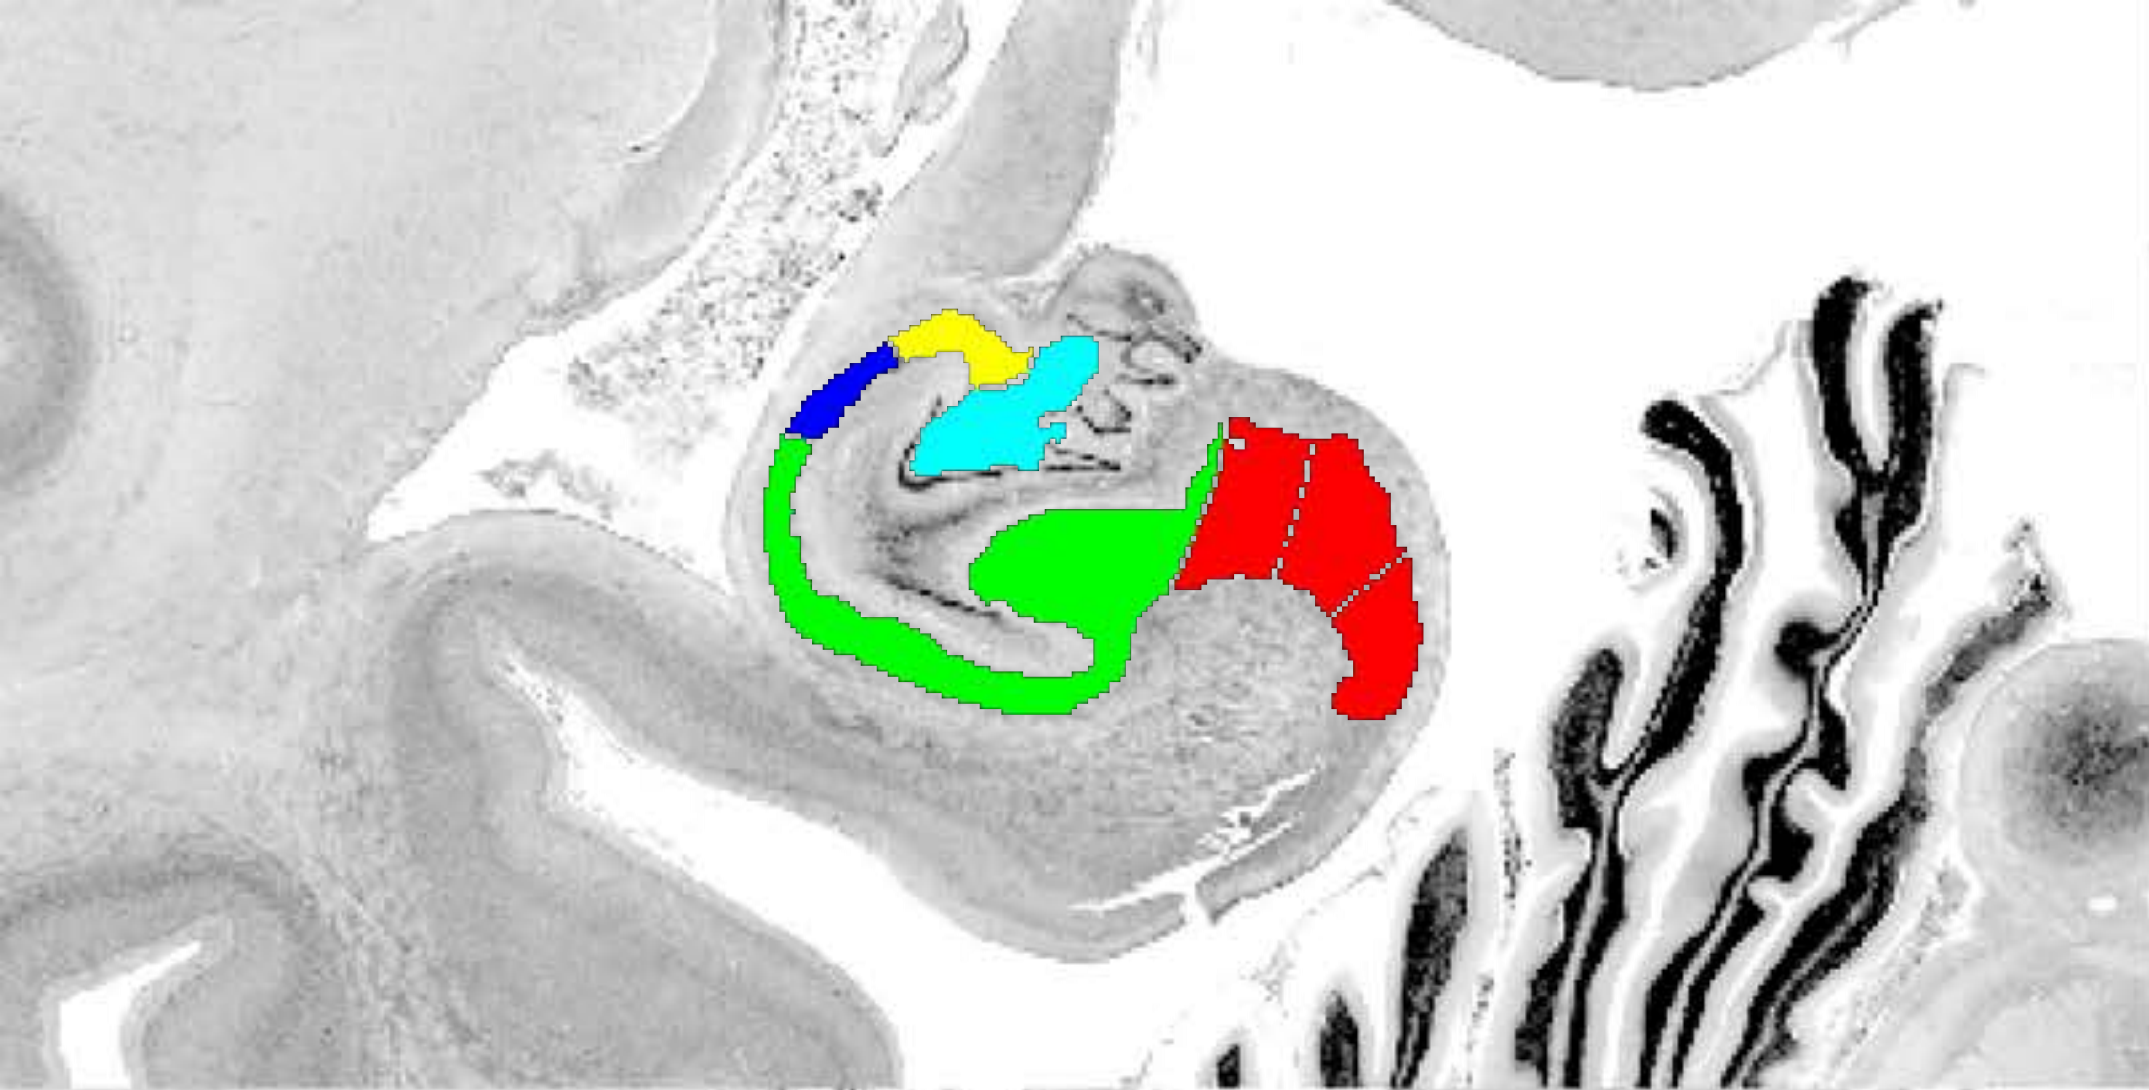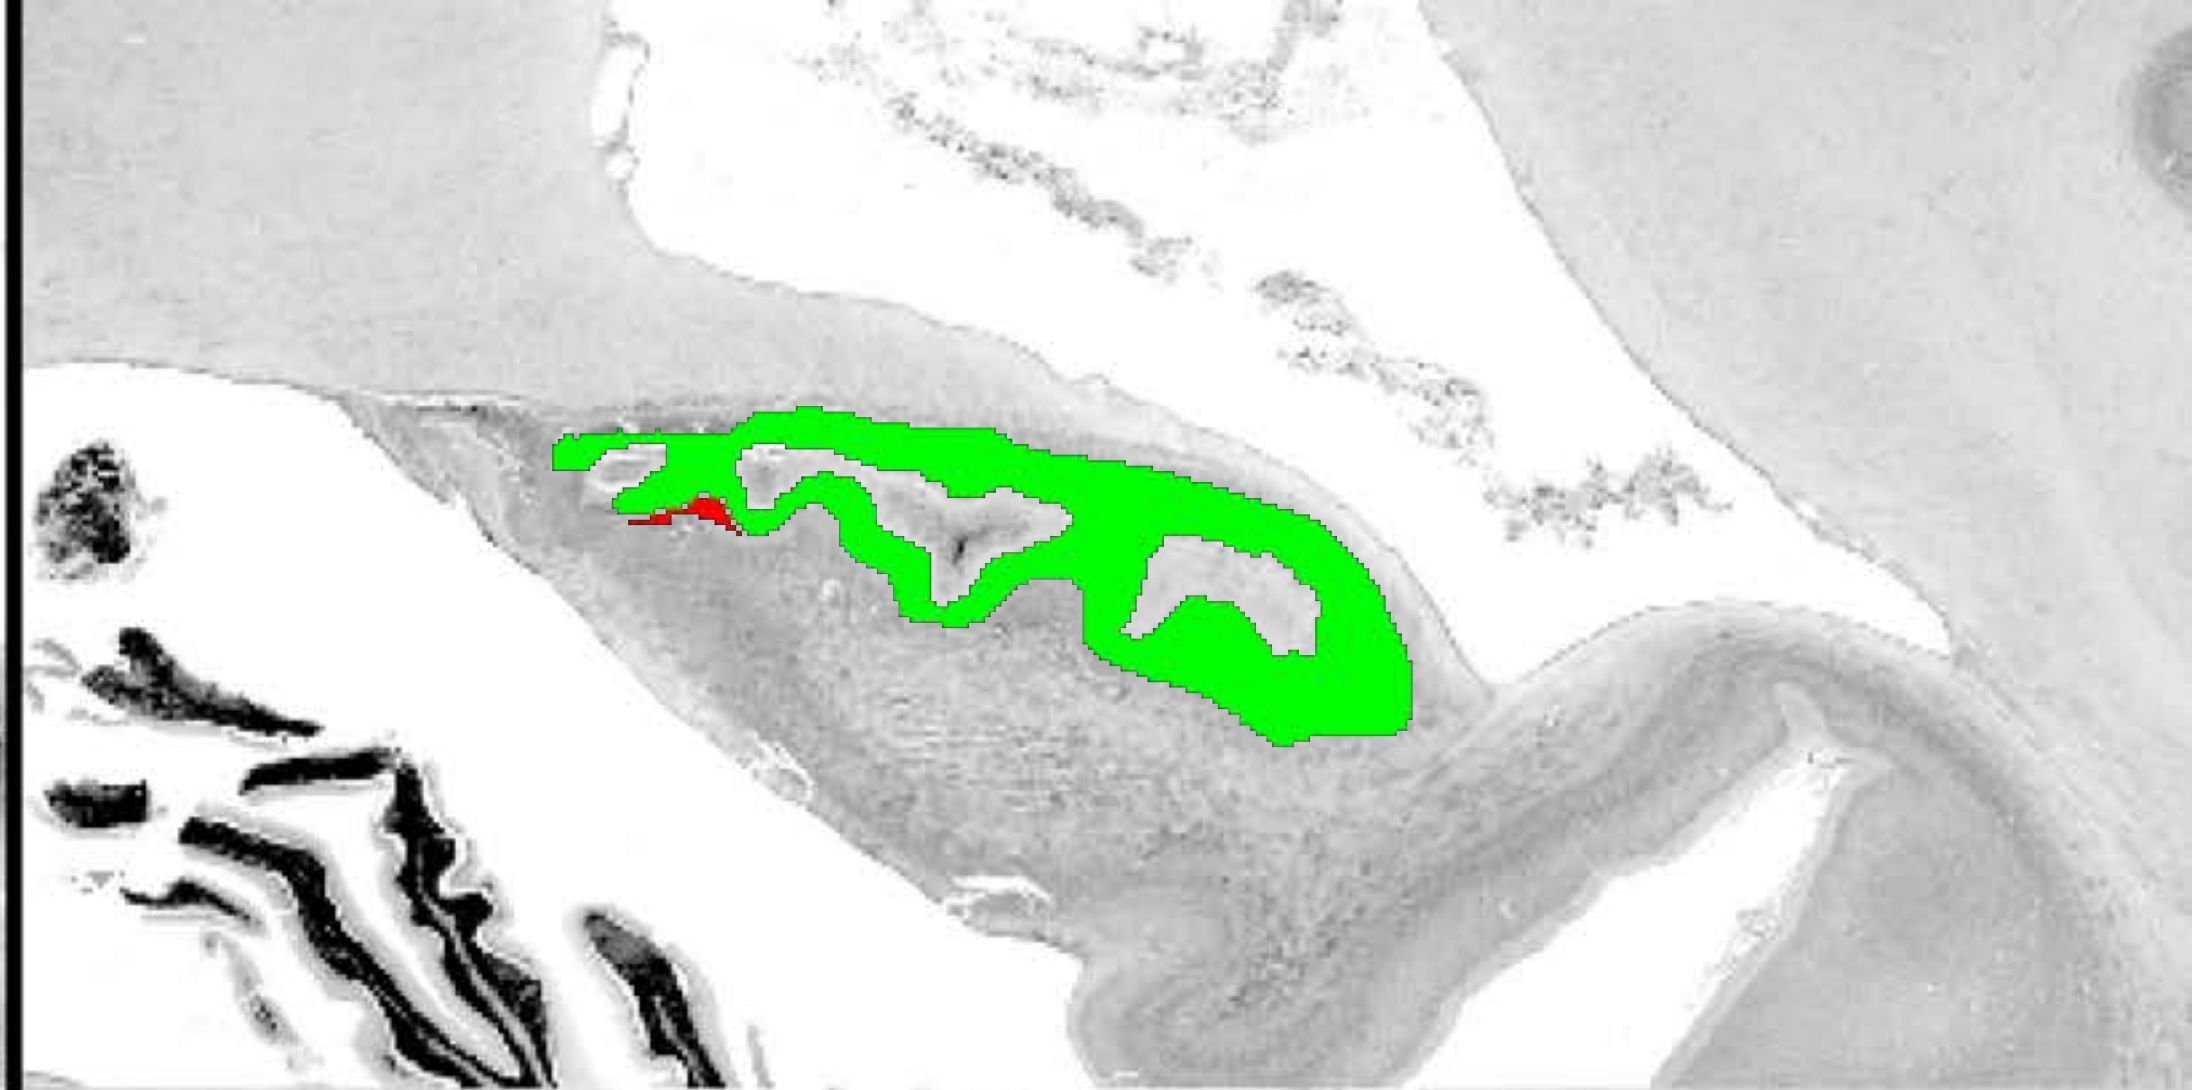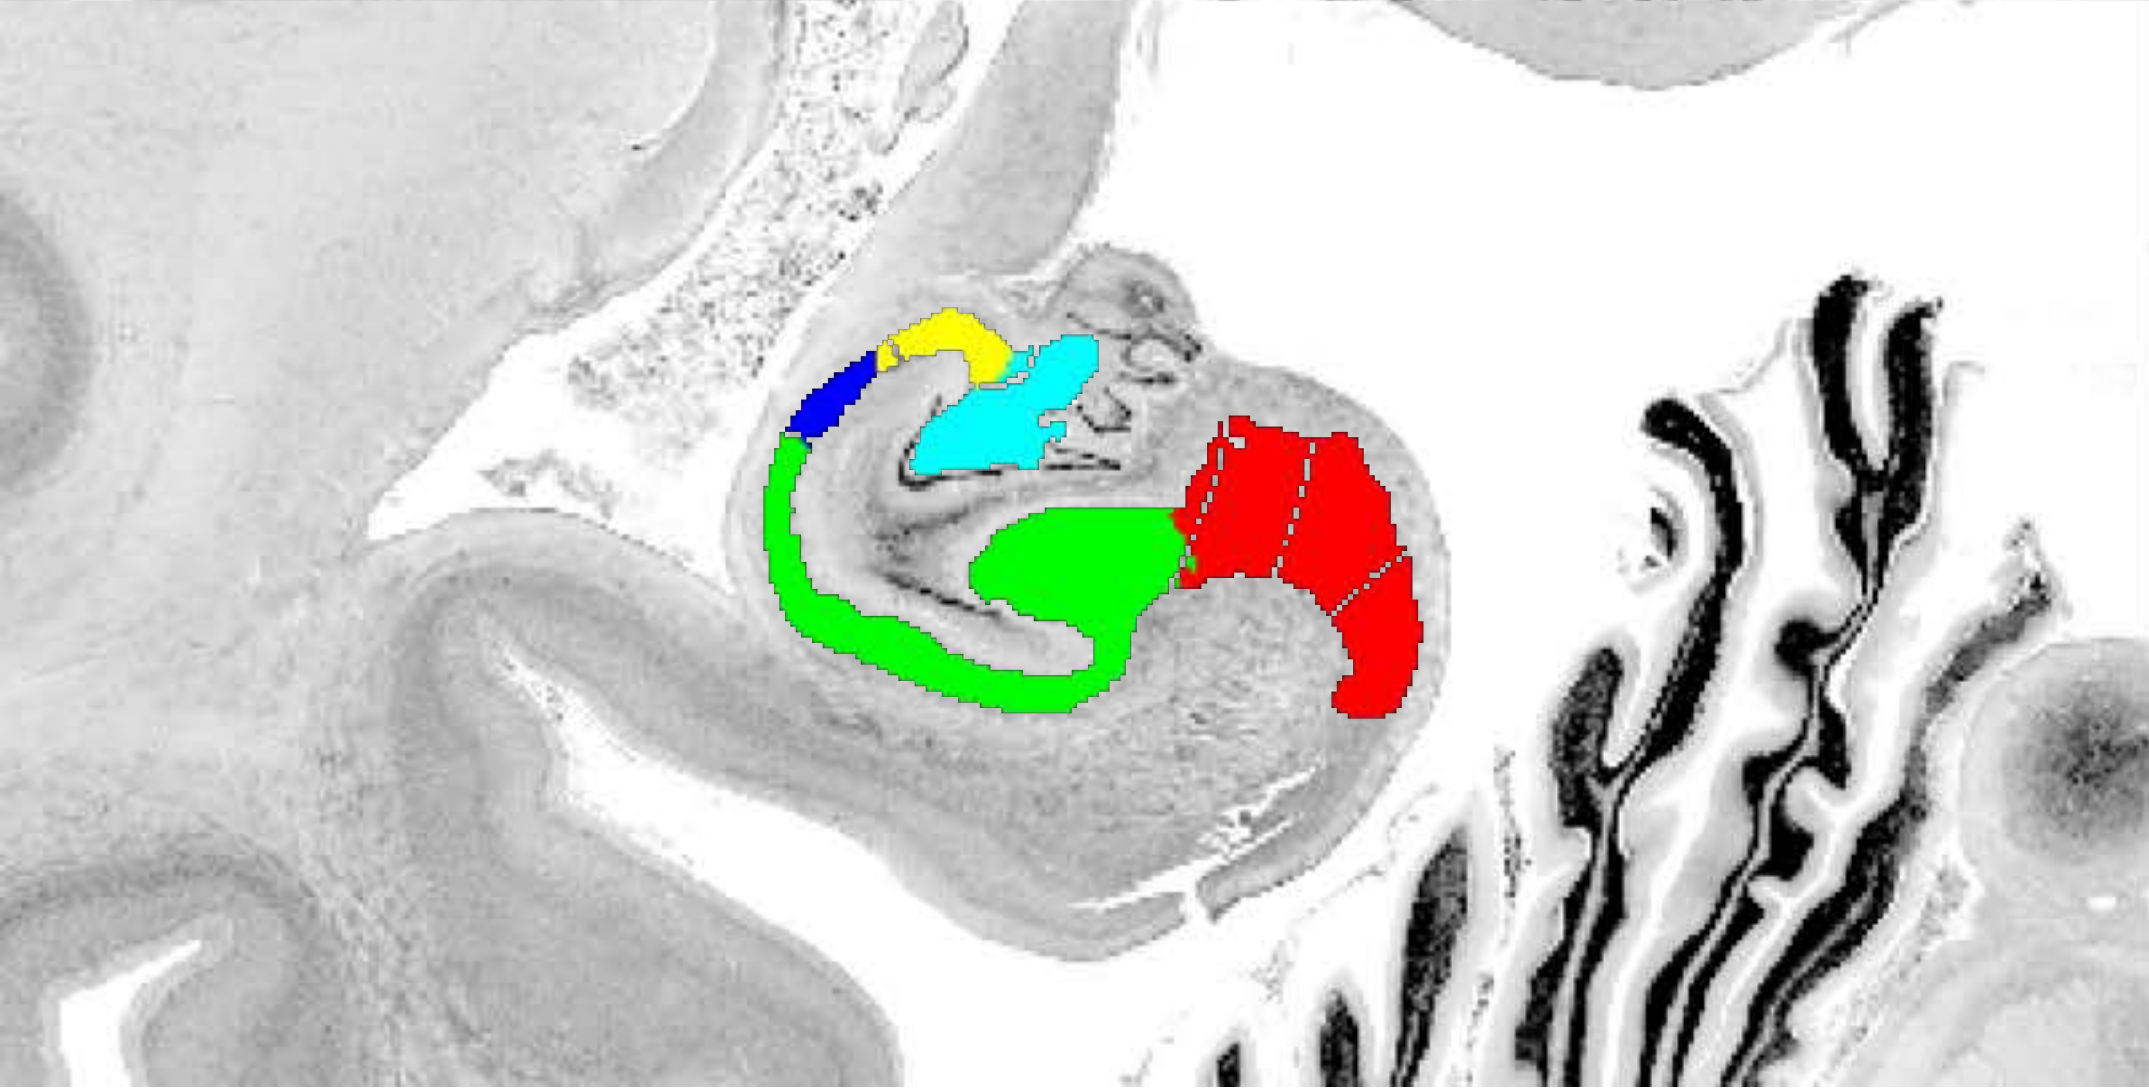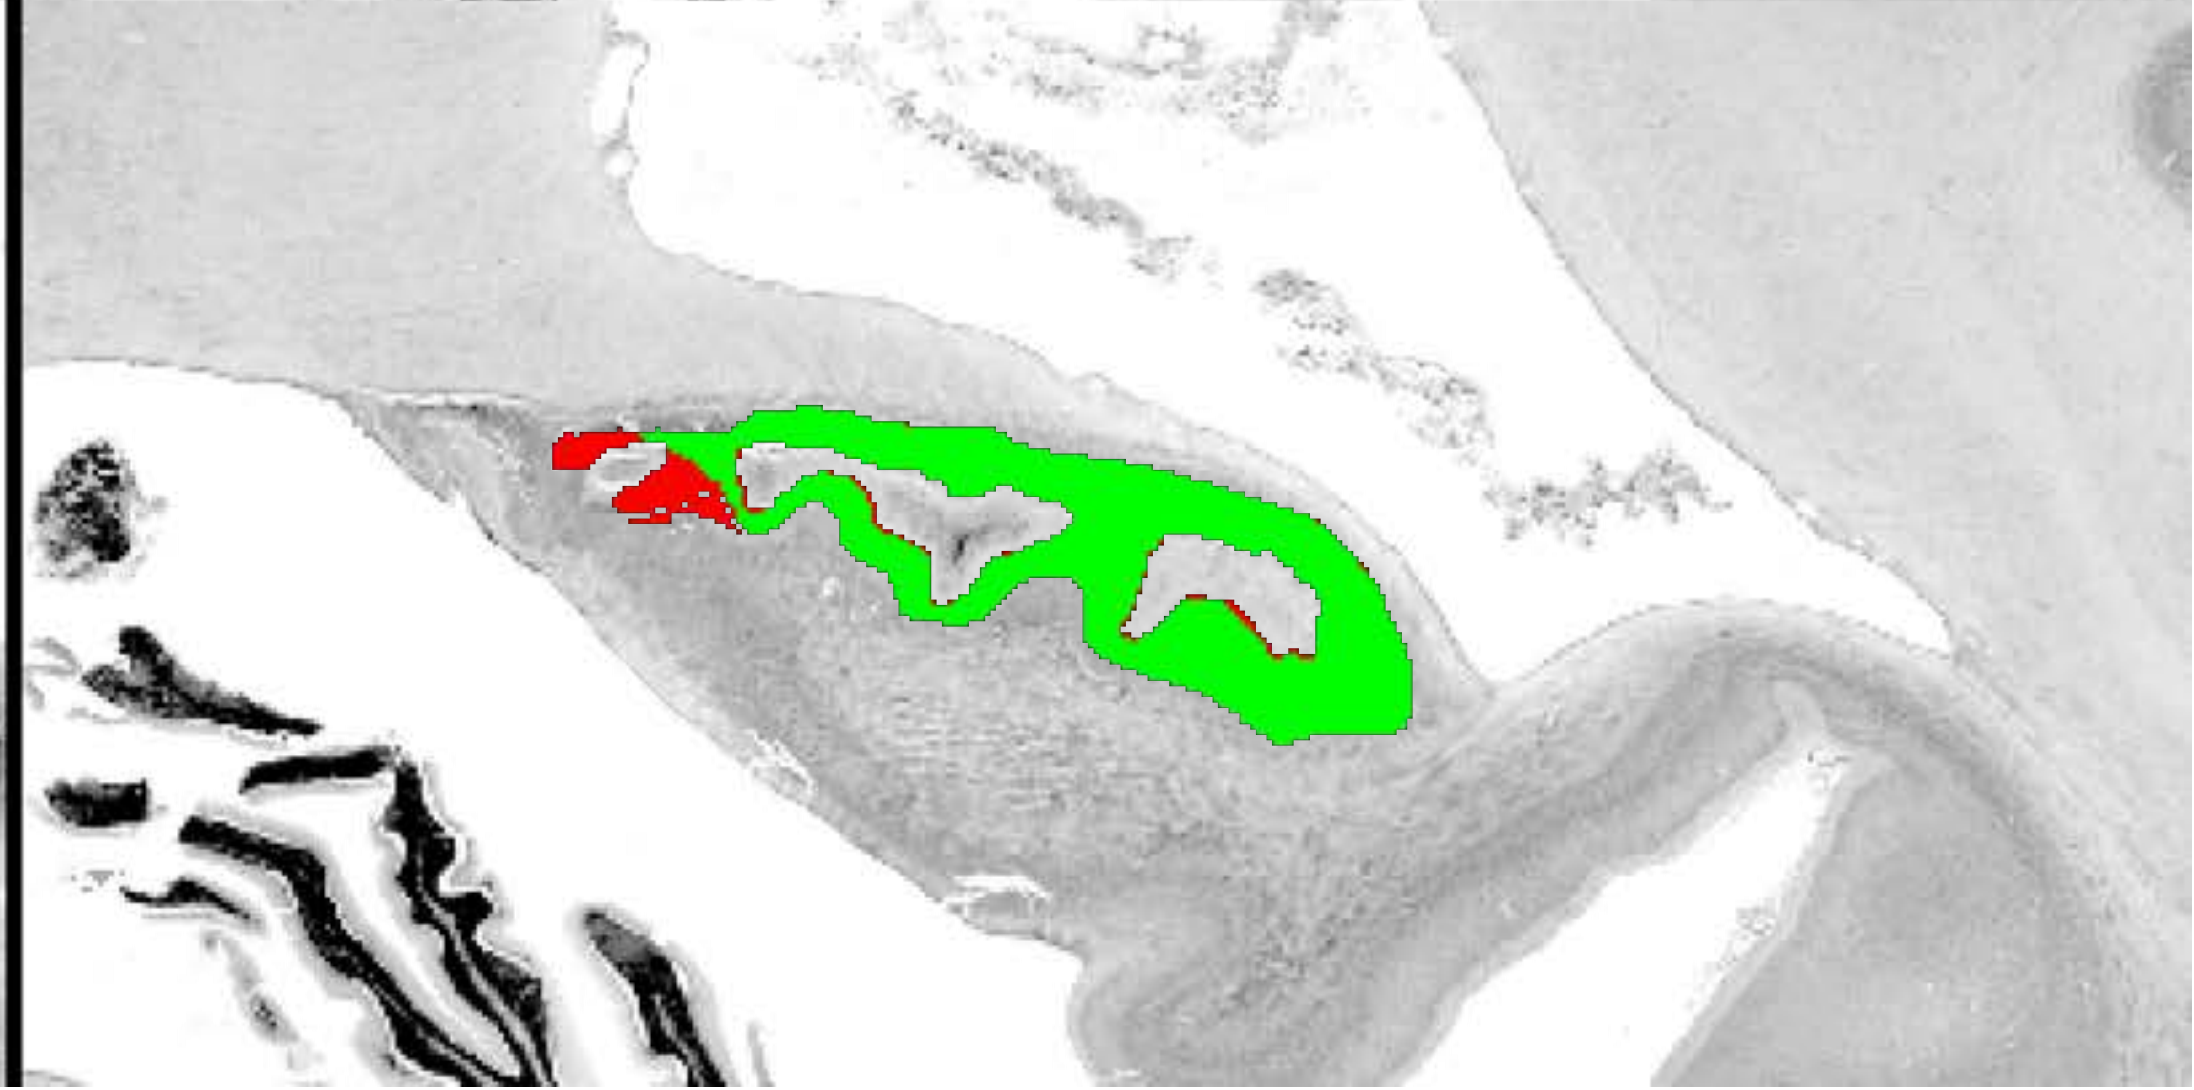



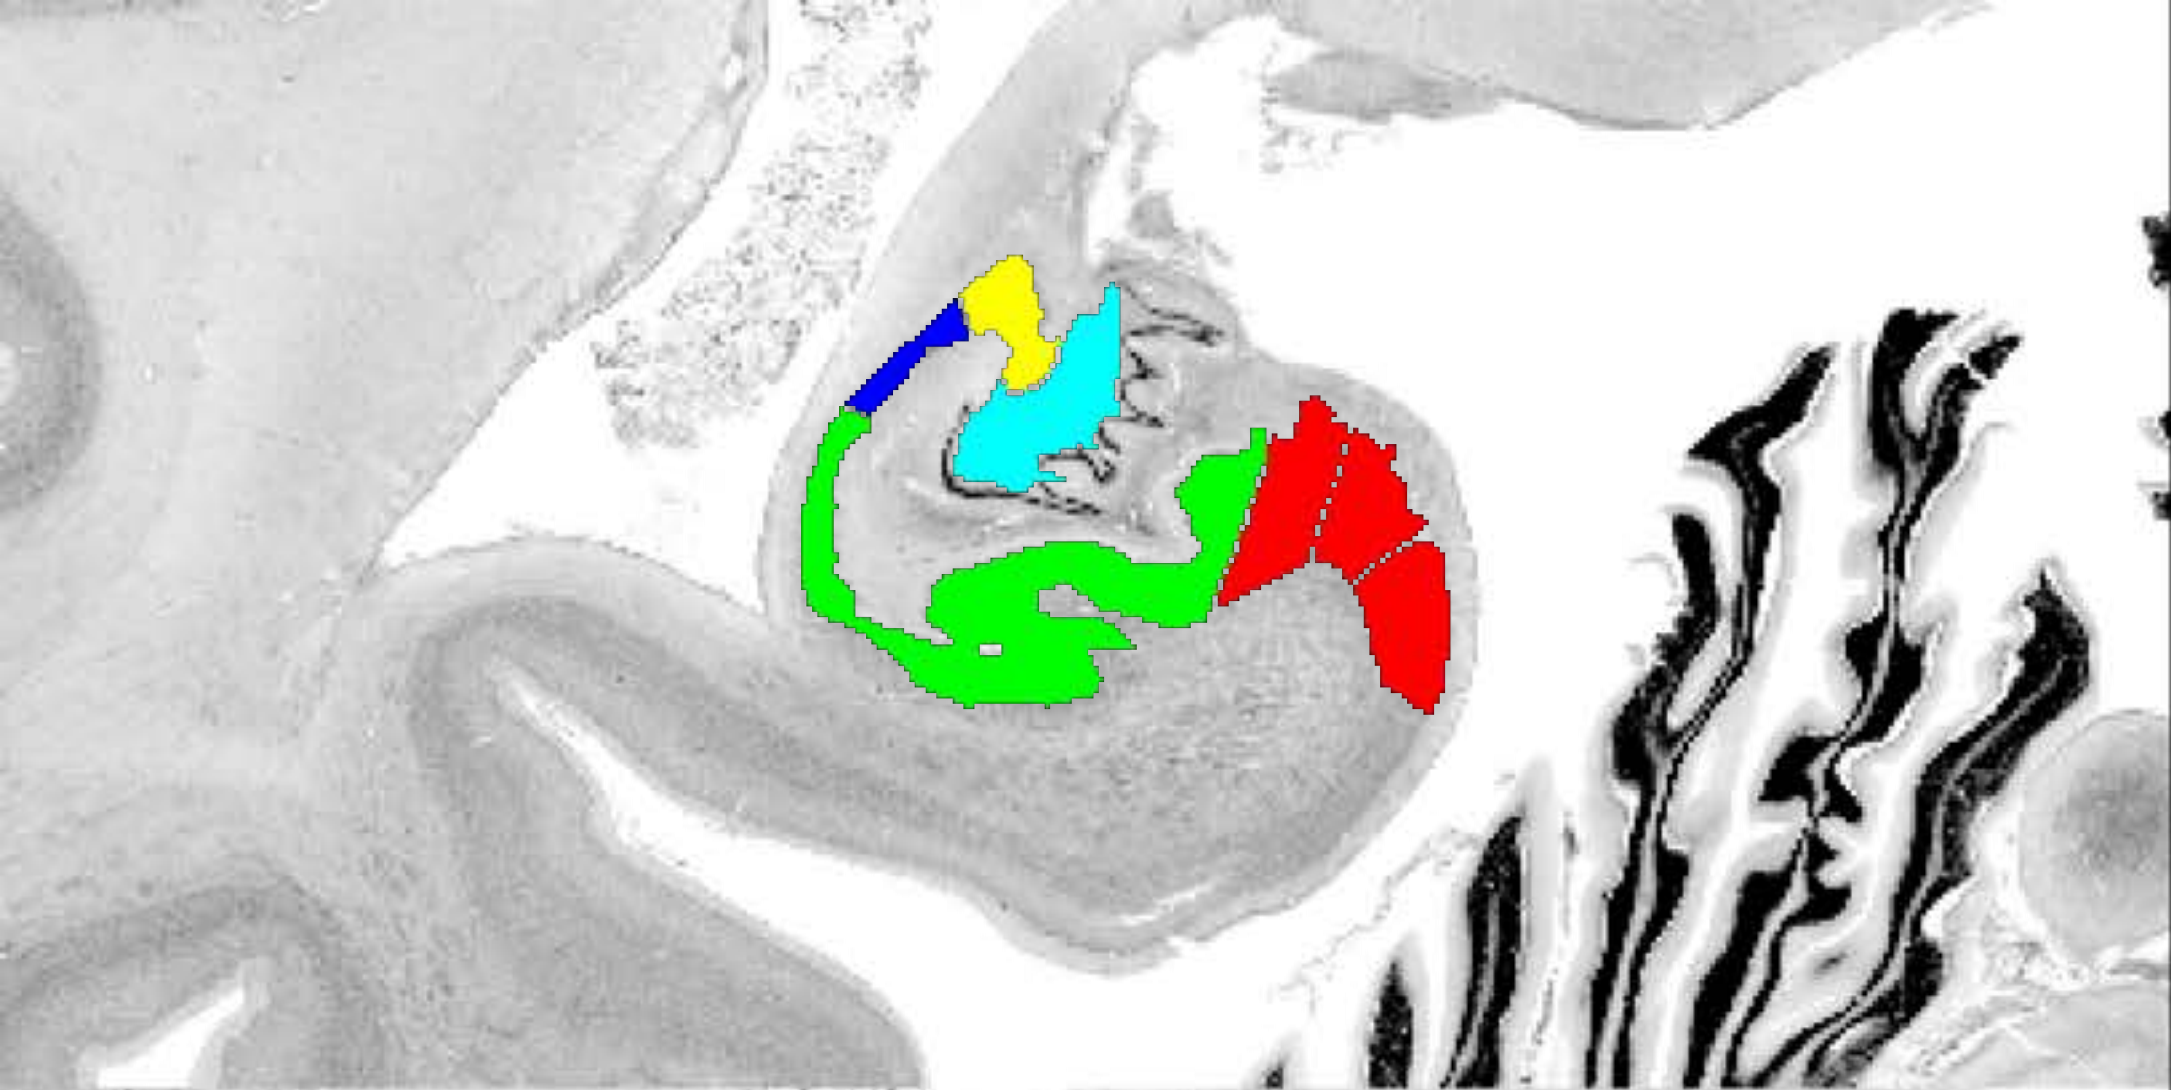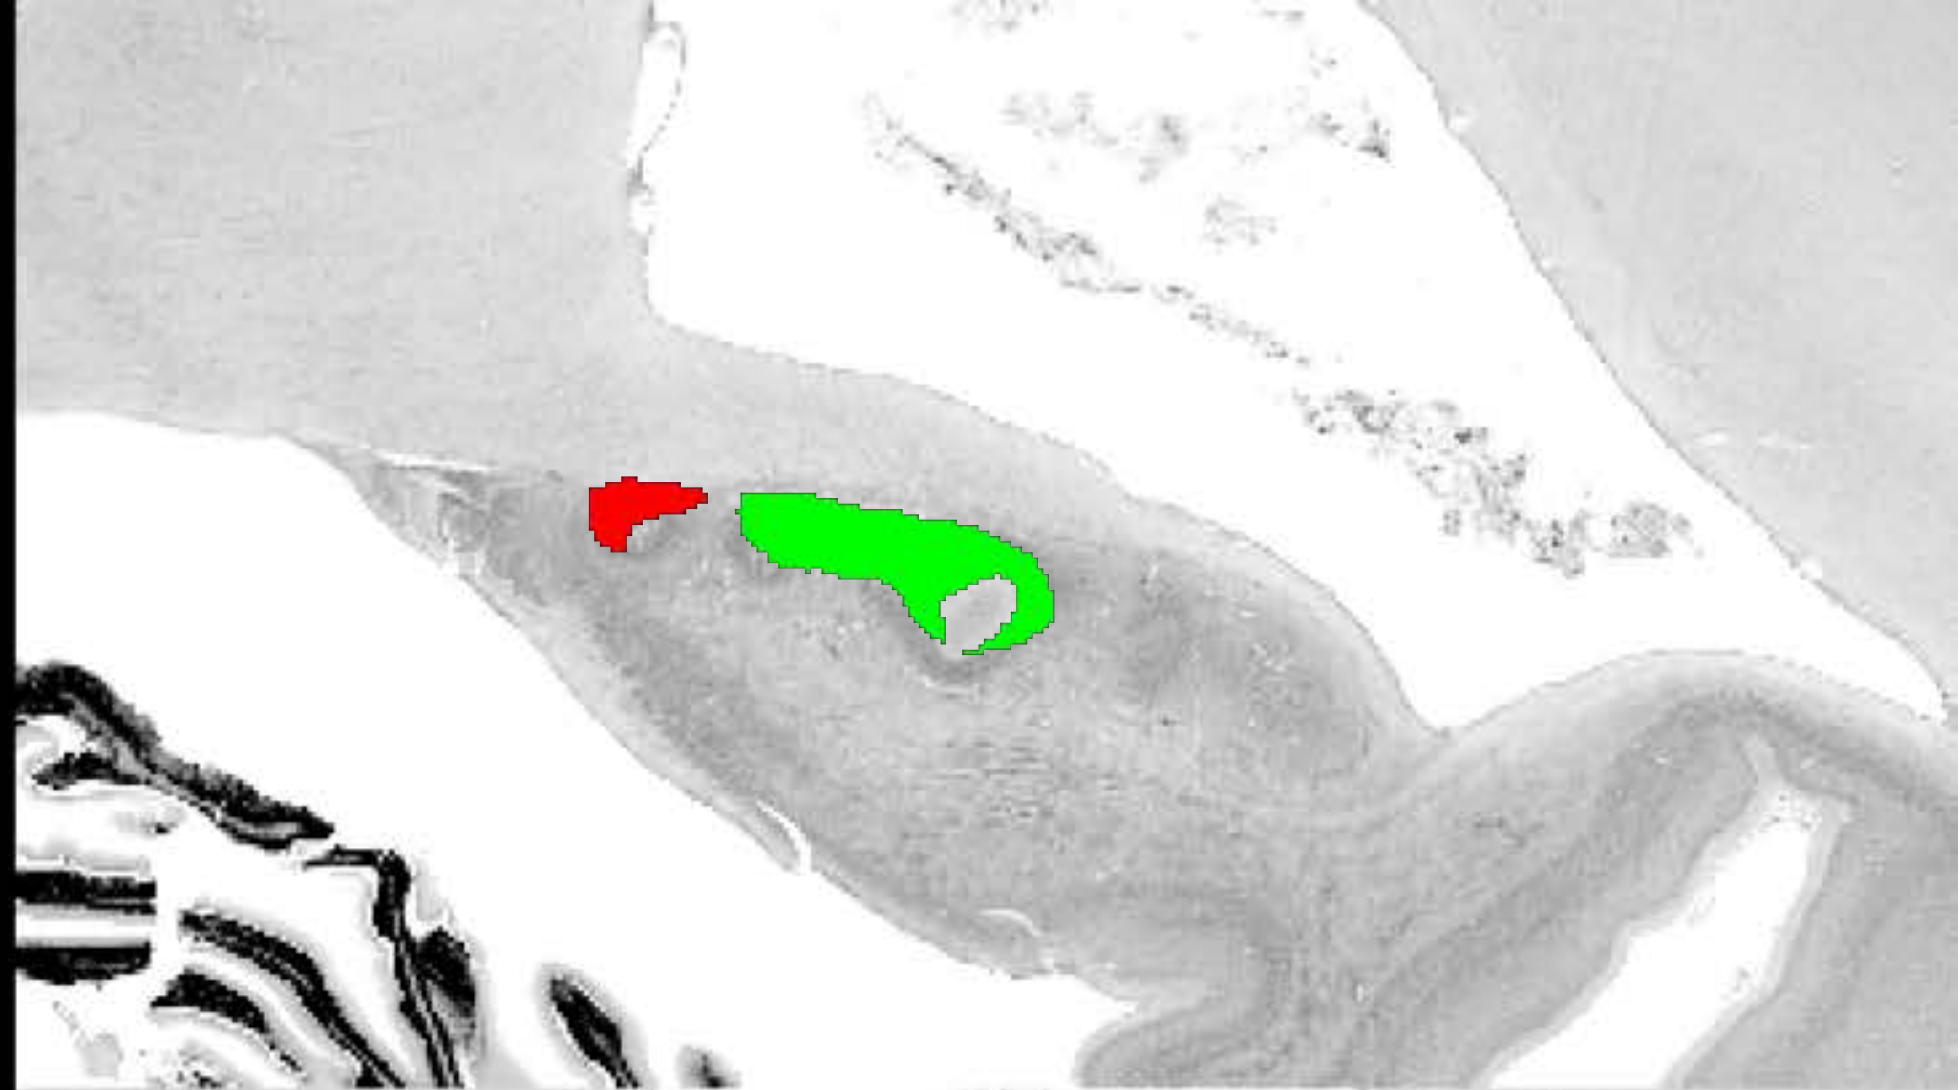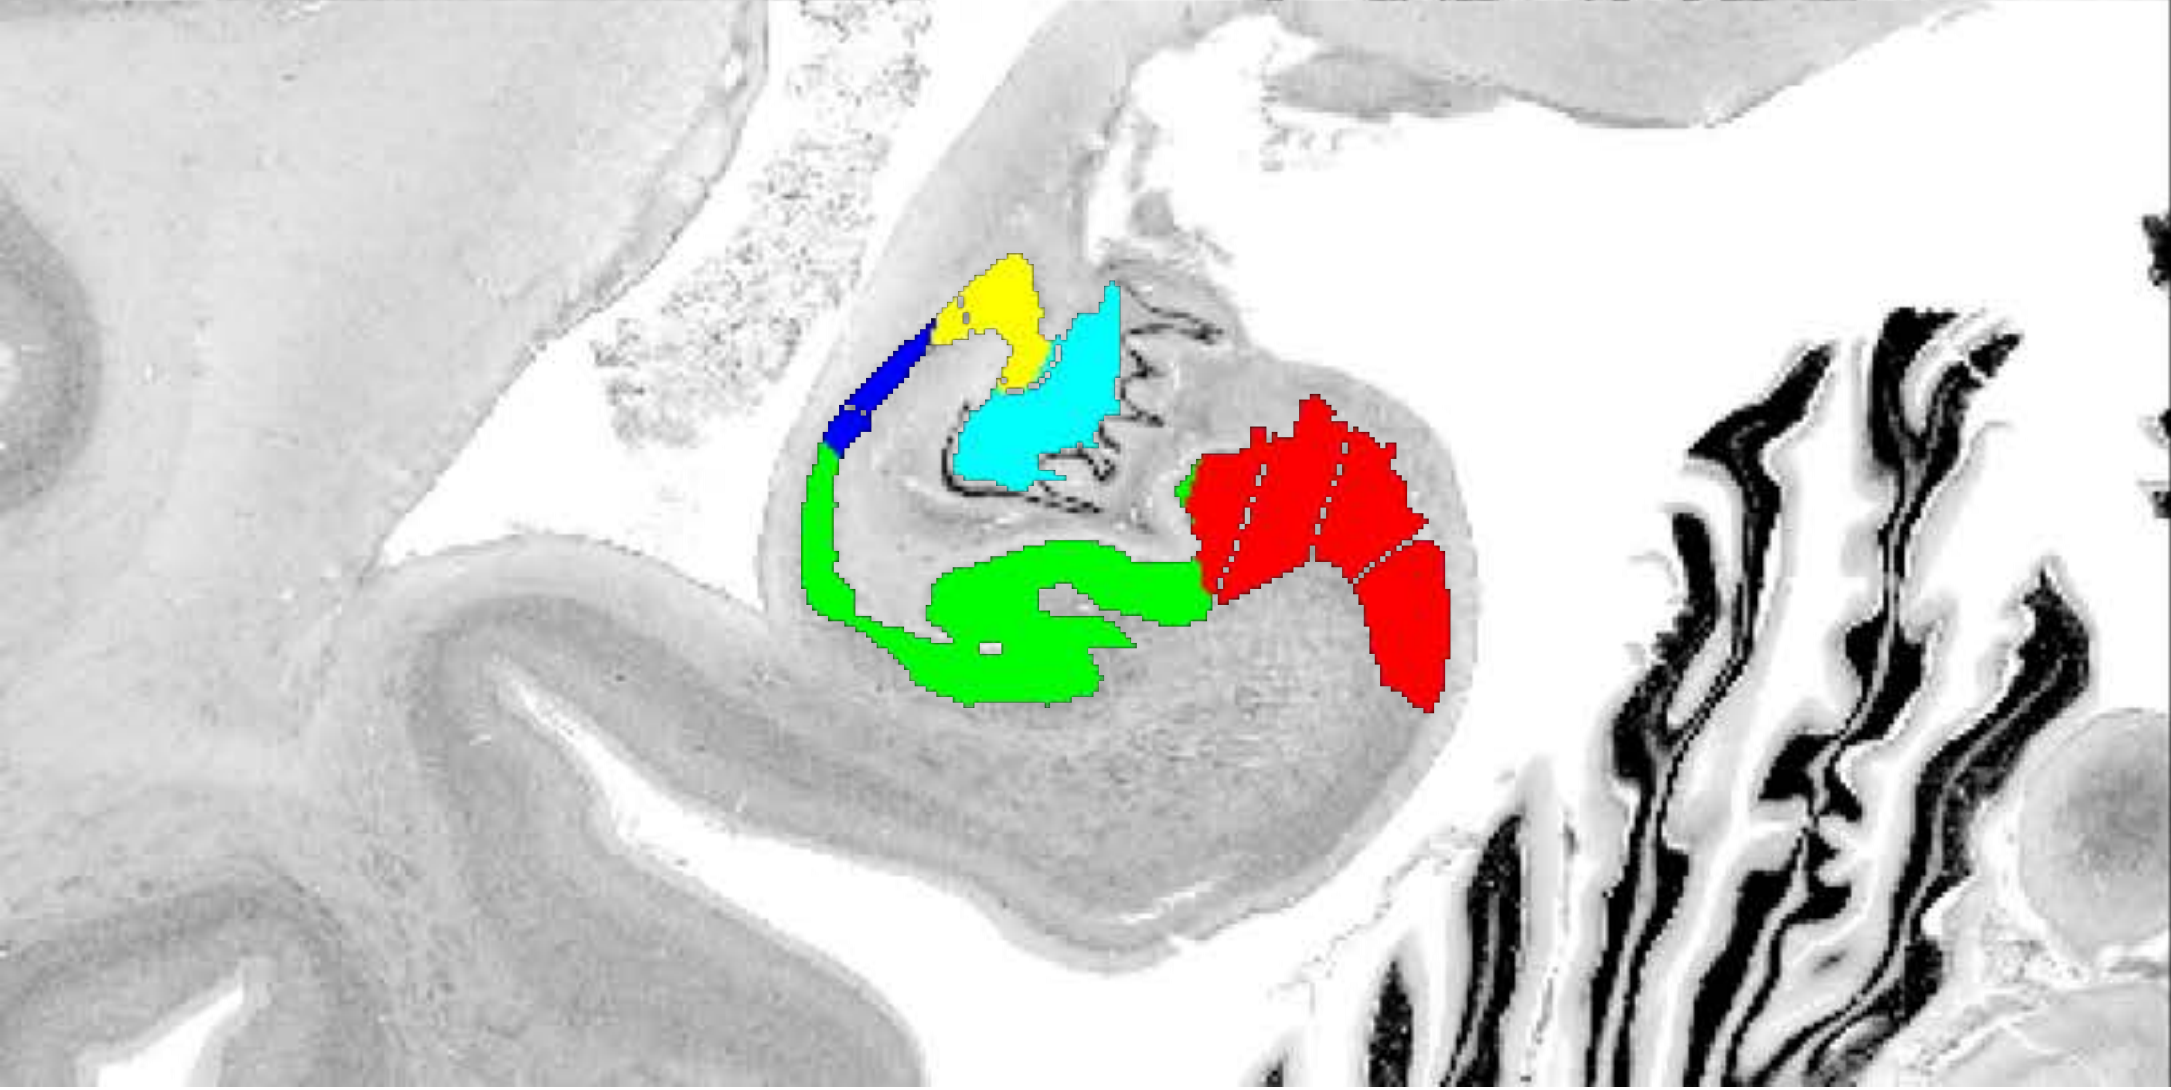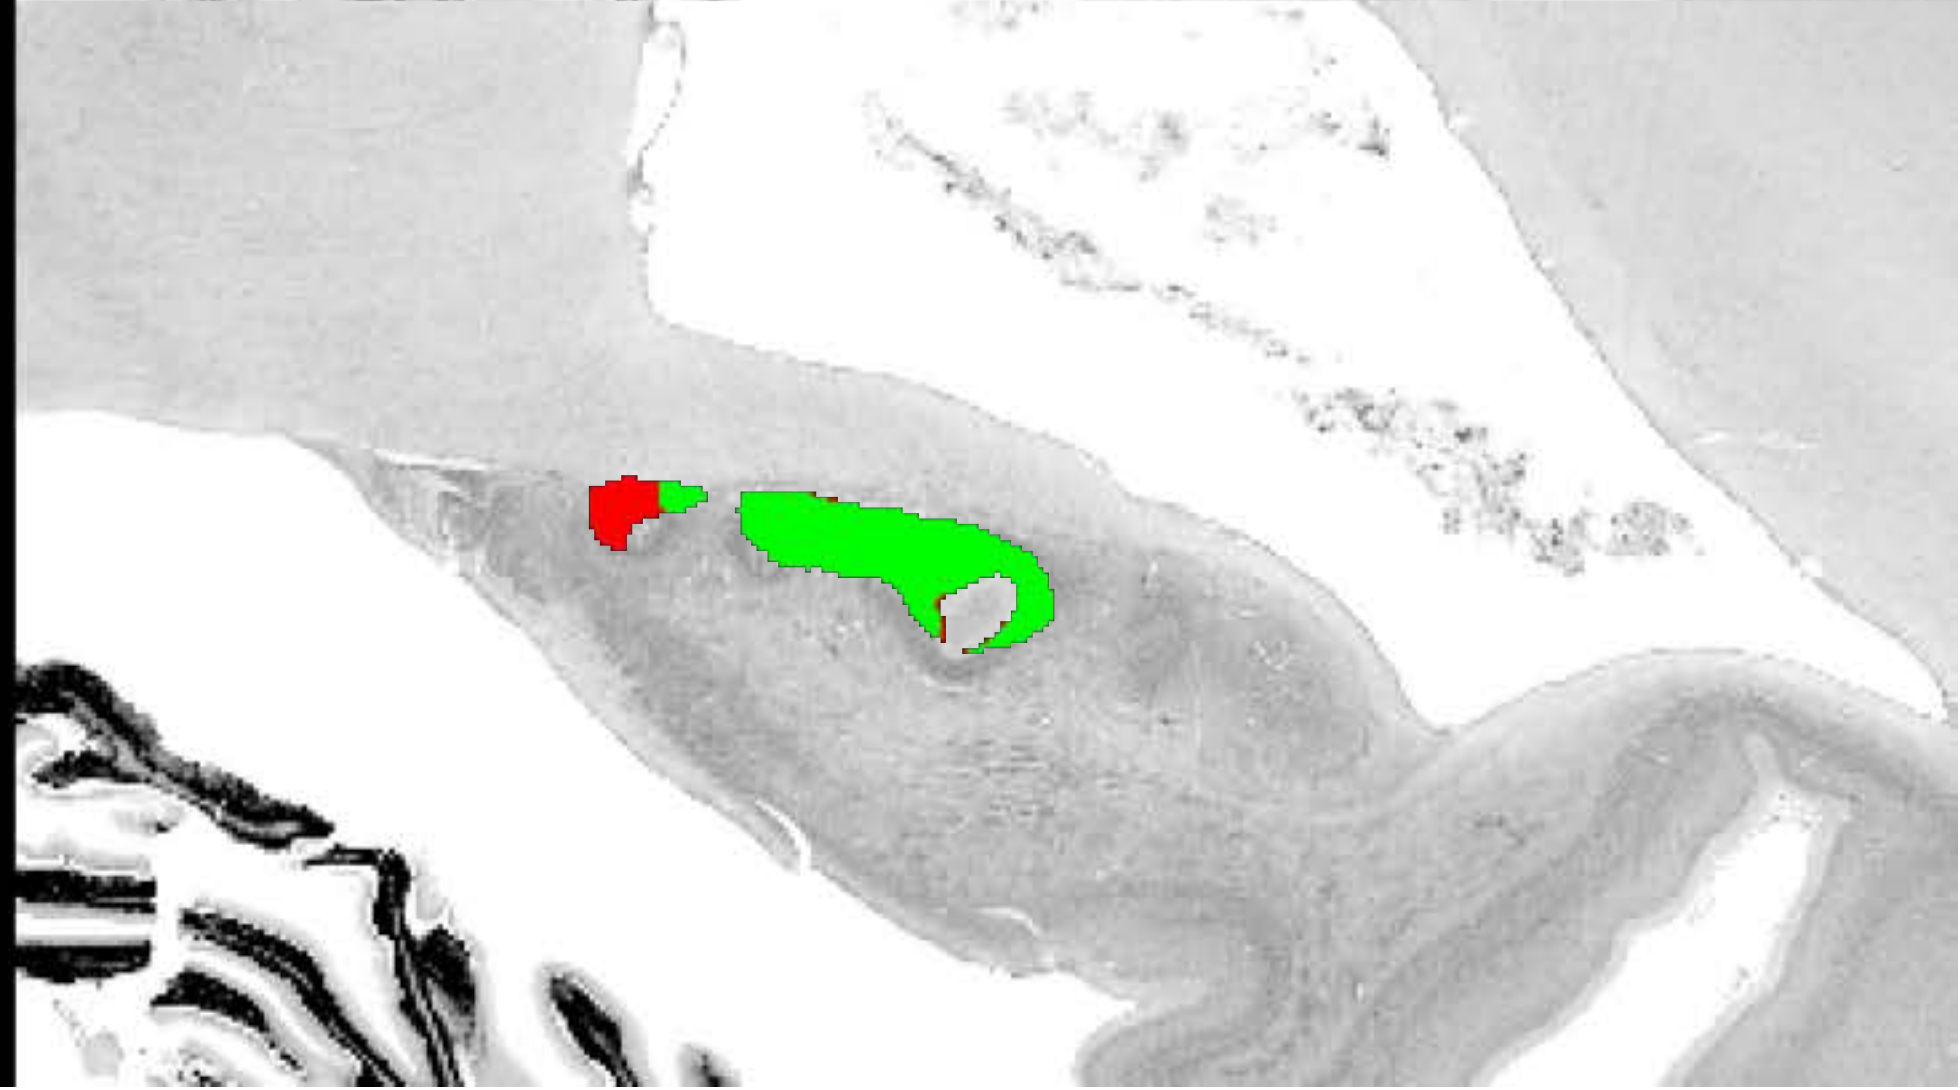



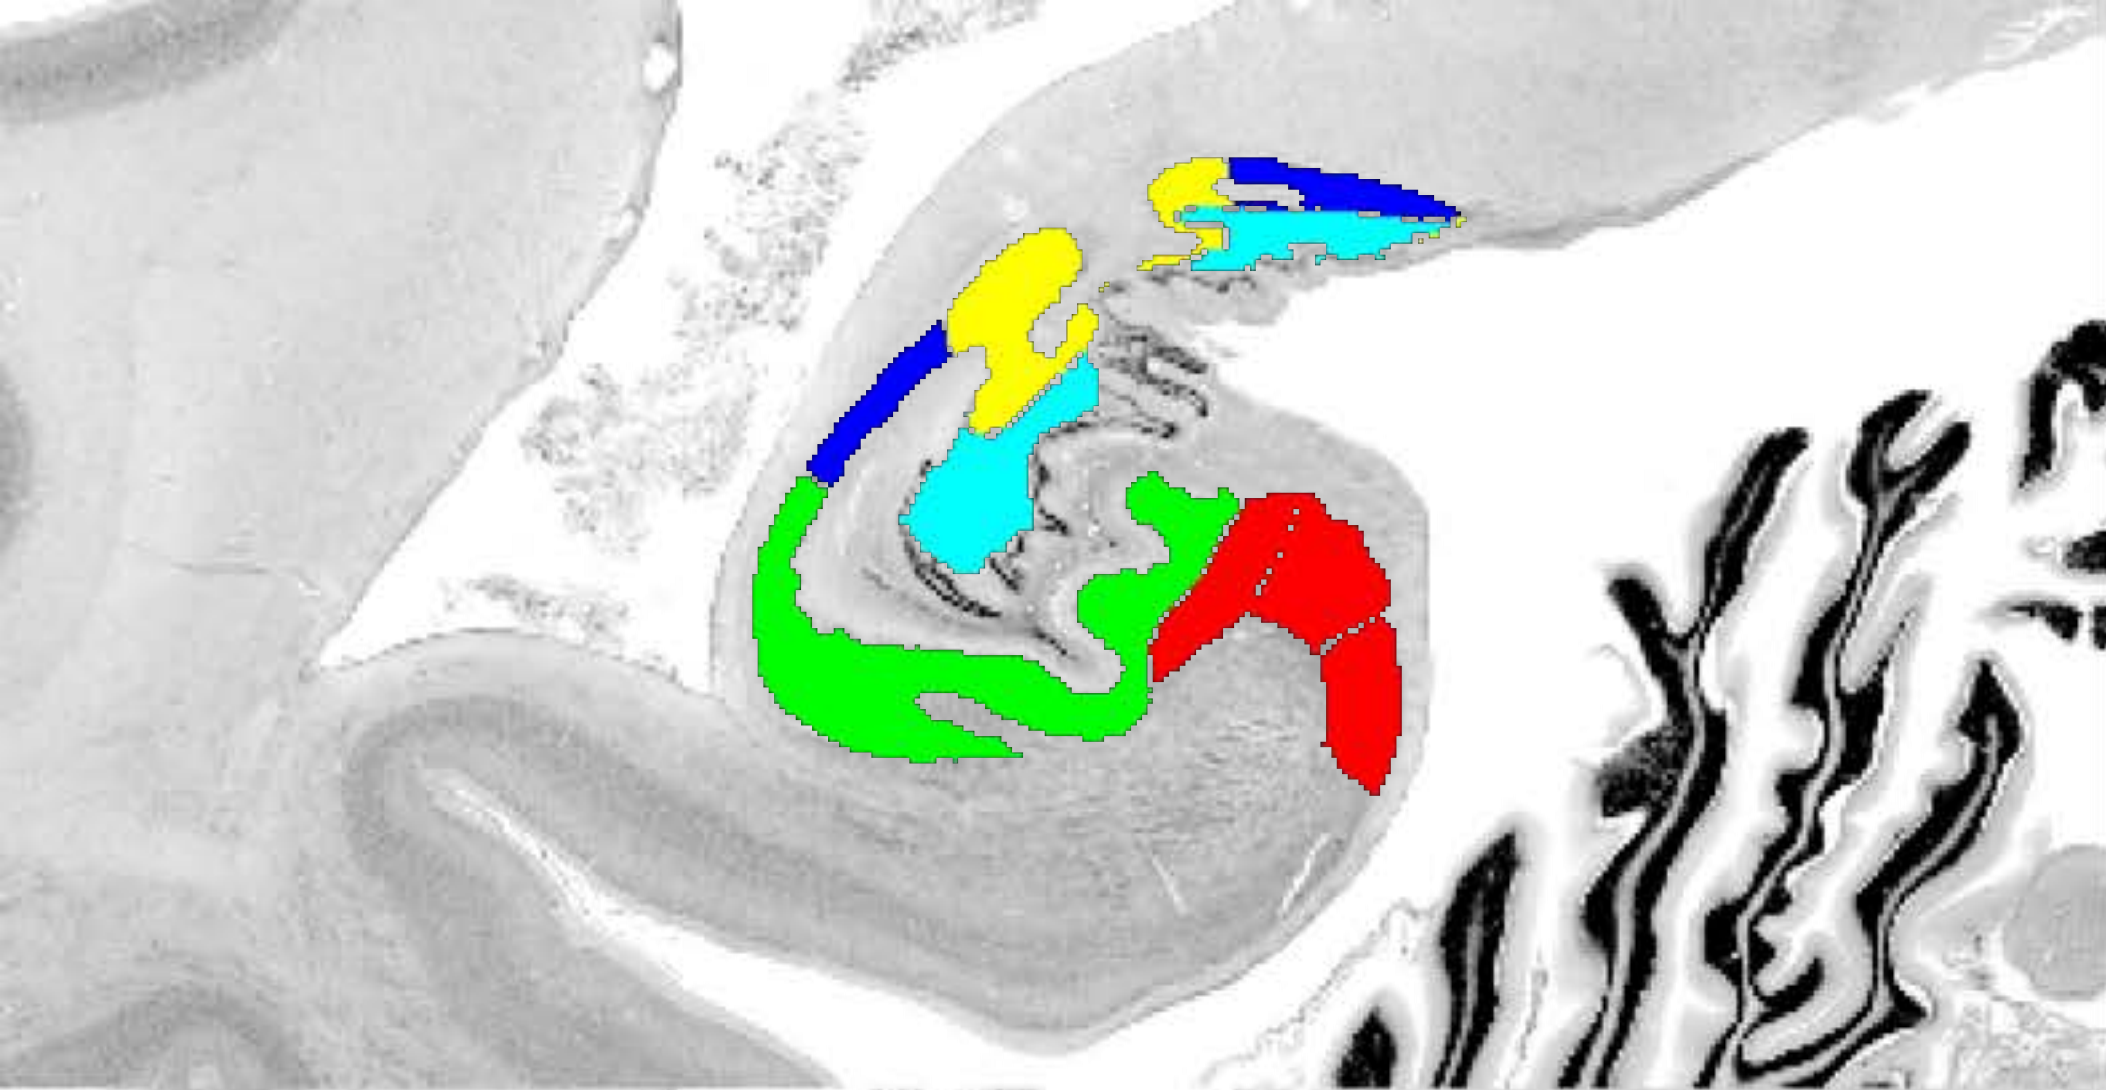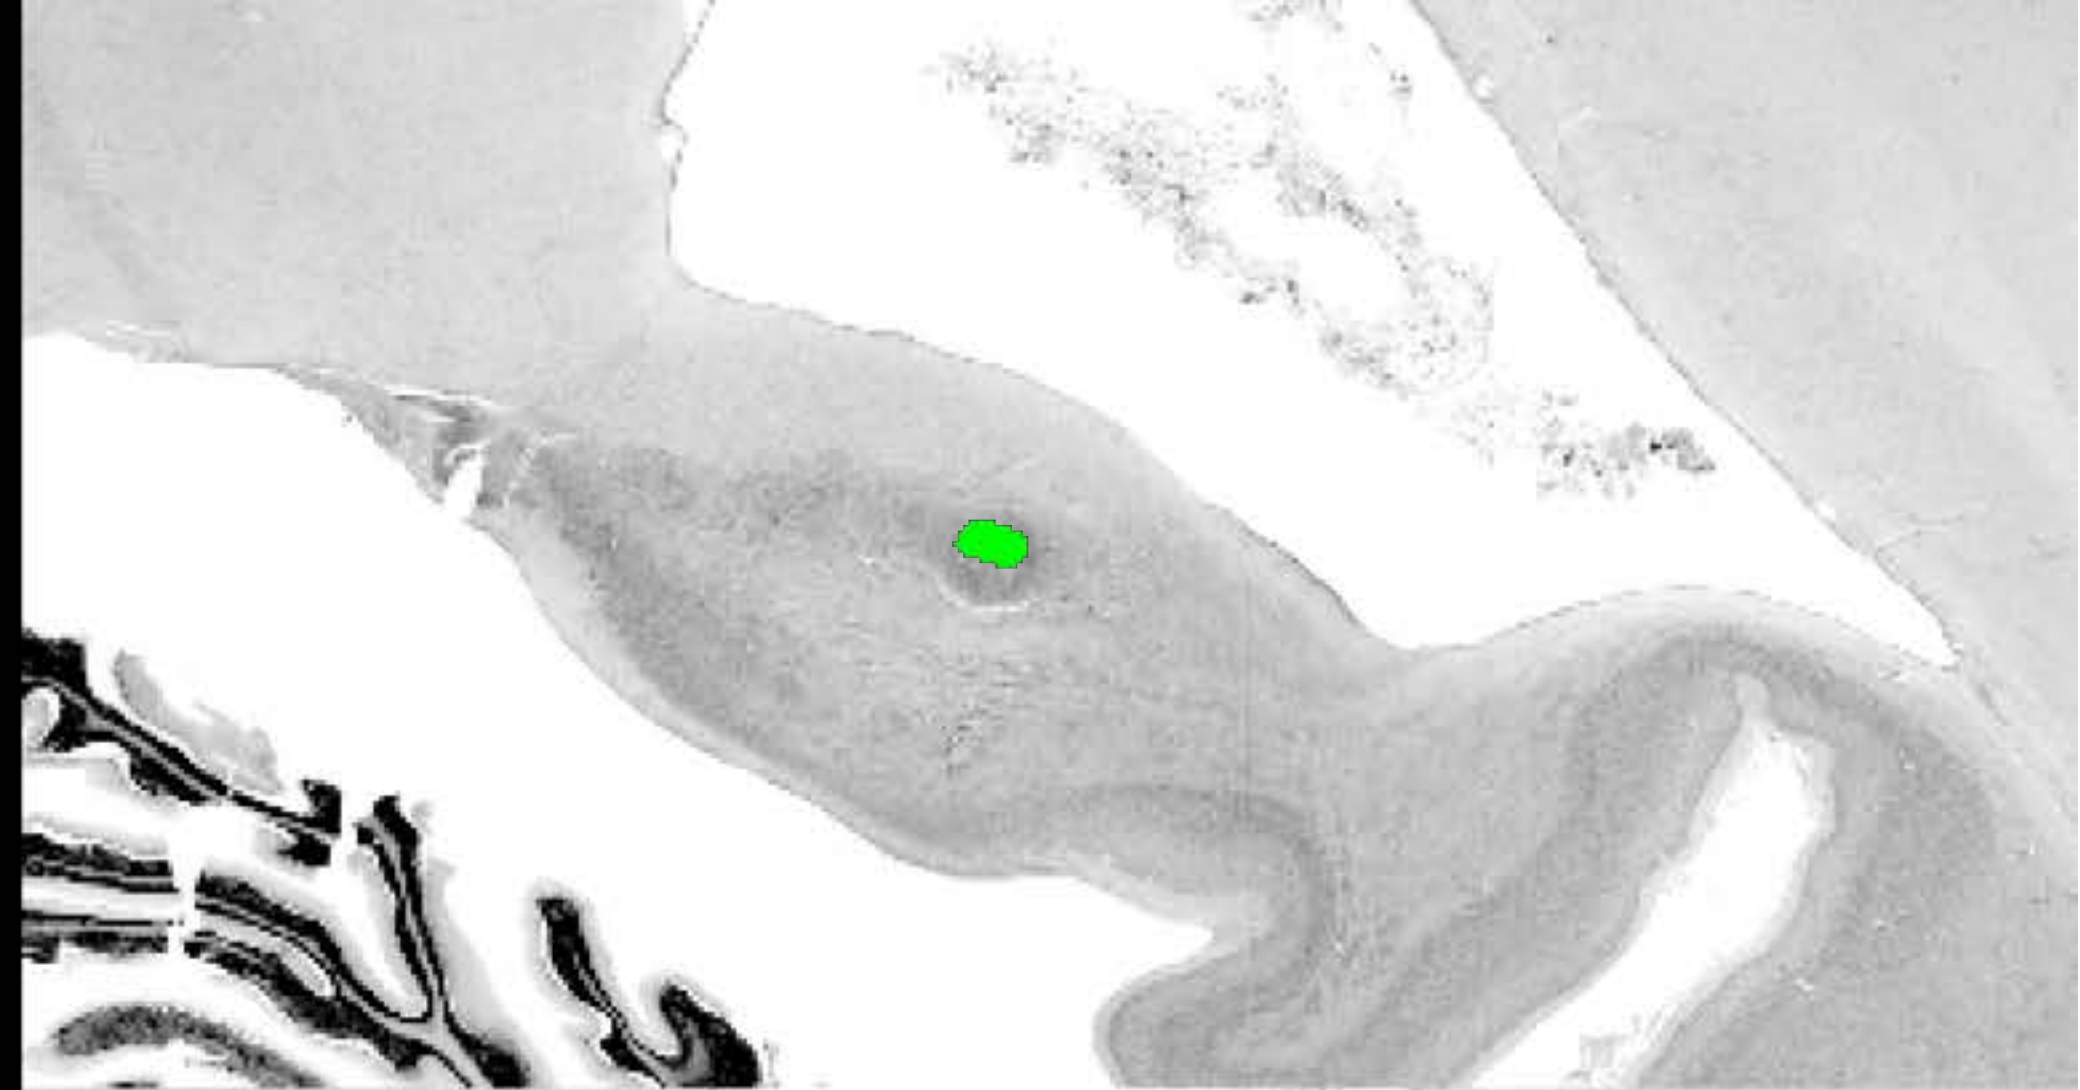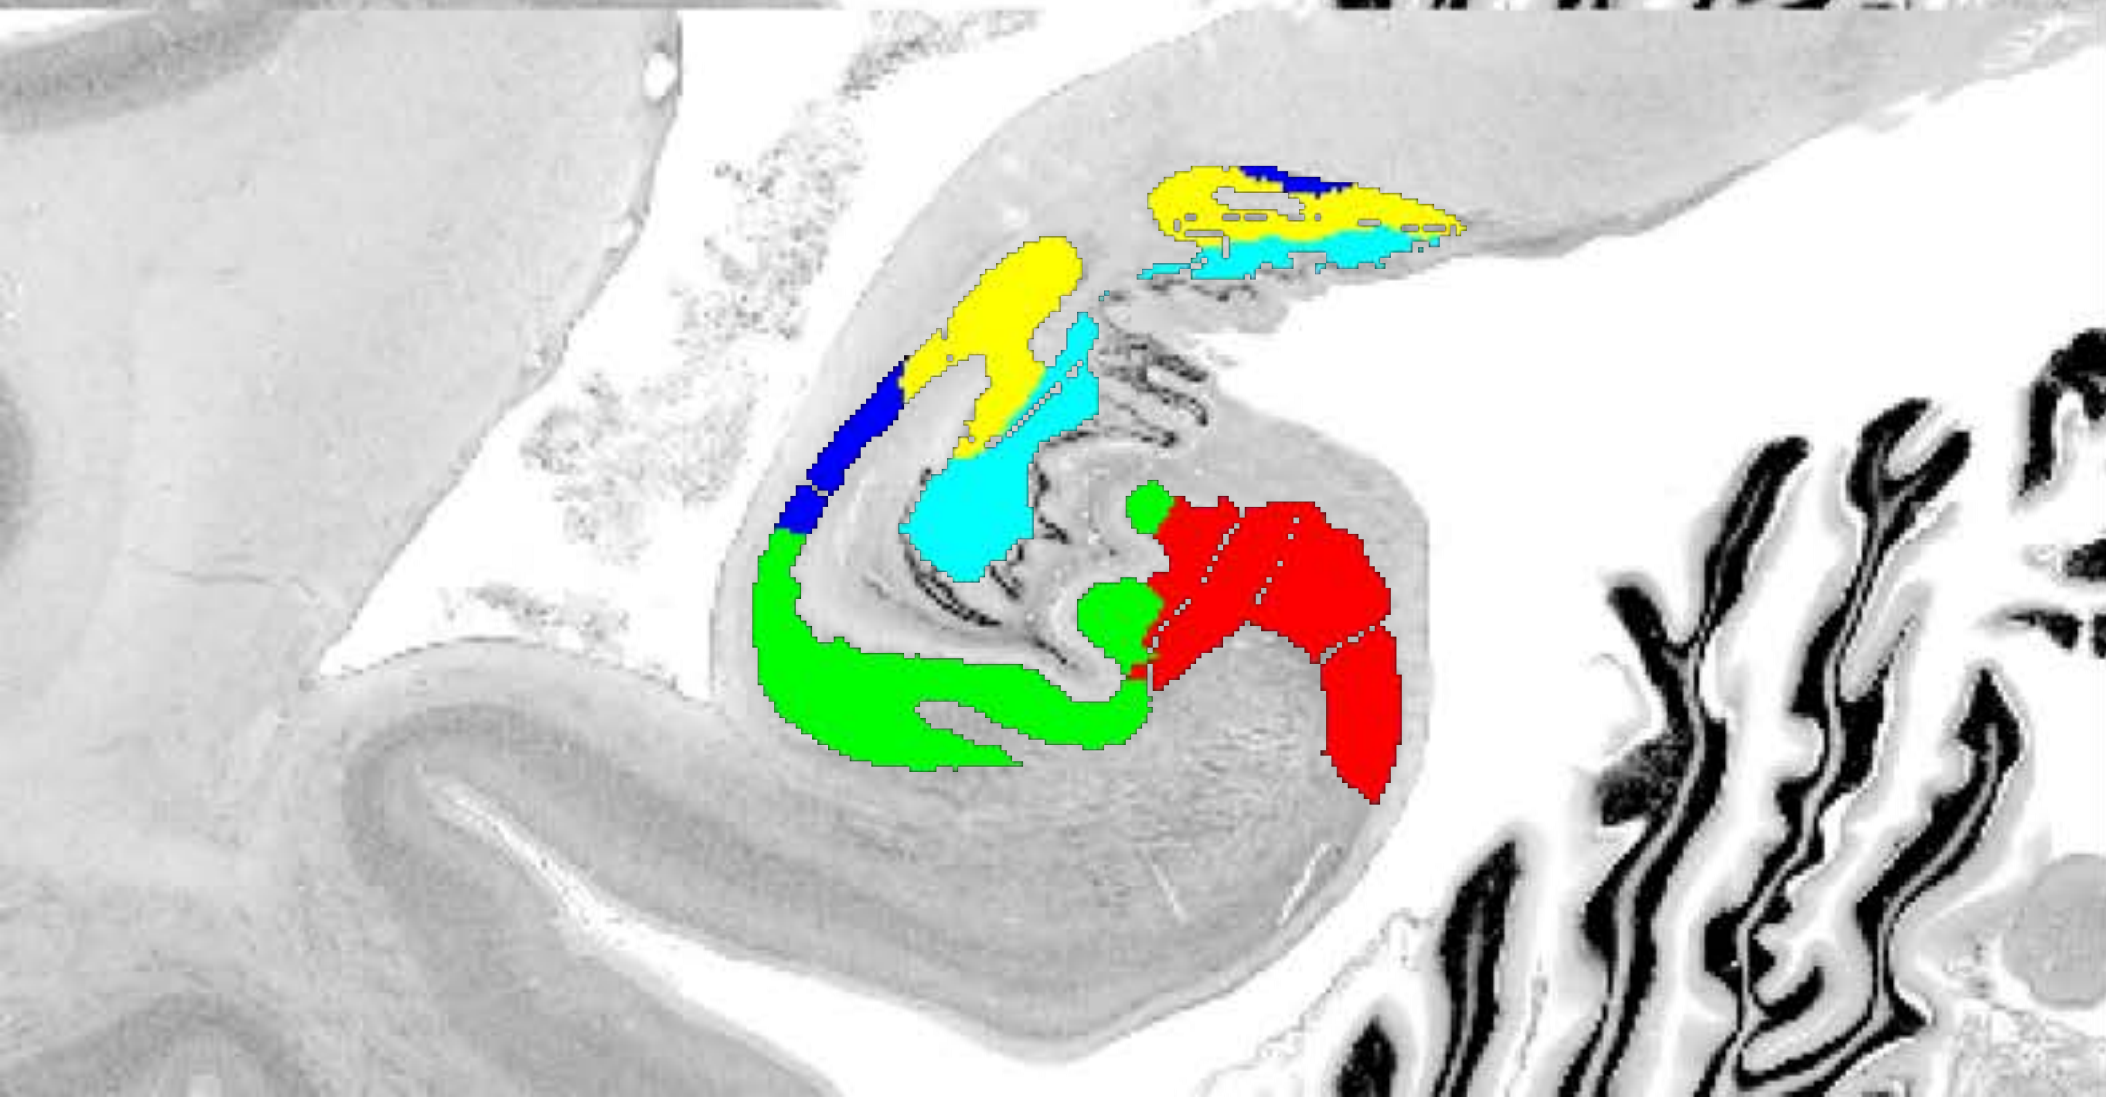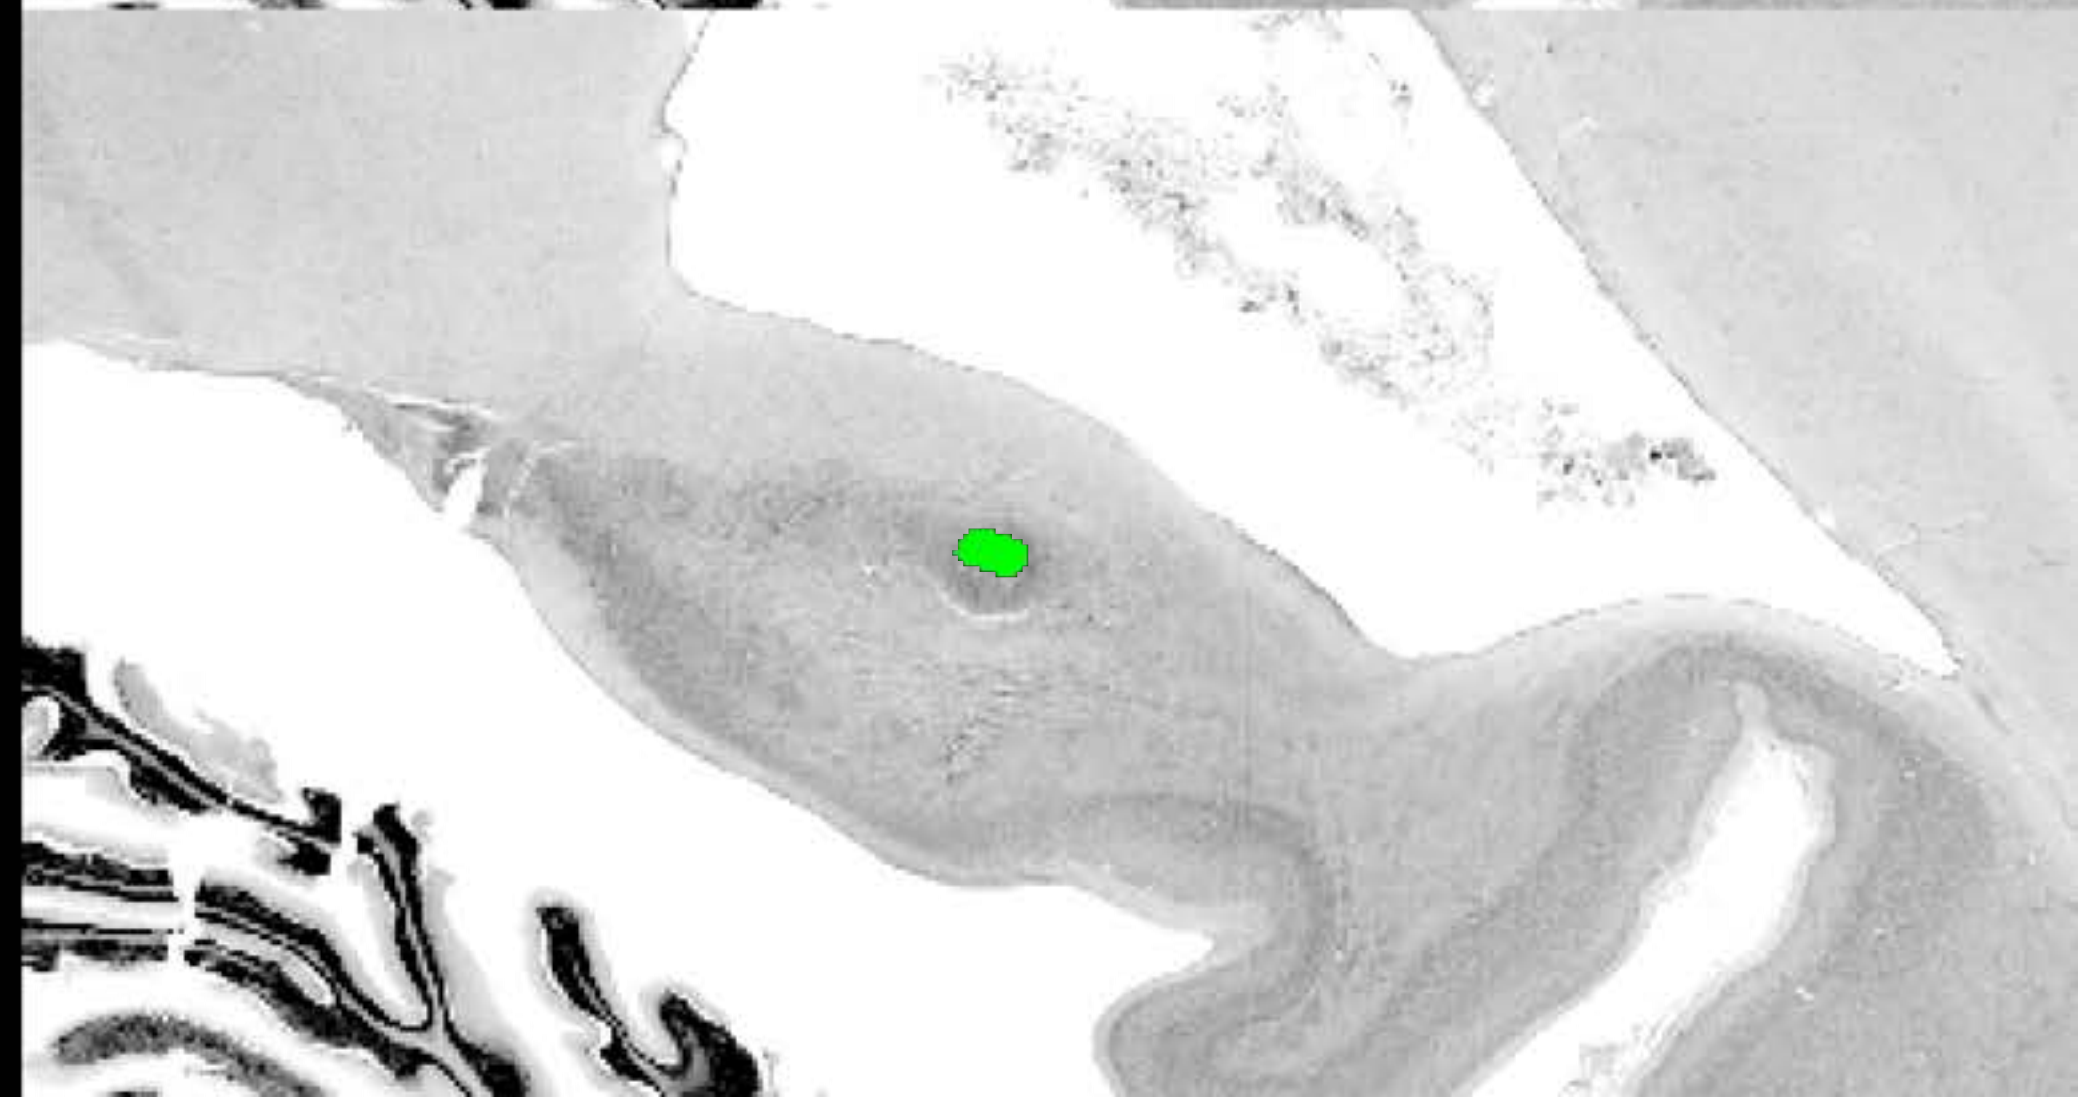

Supplement: supp1 [file elife-88404-supp1-v1.pdf]
